# Supplementary material for: Synthesis of difluoromethylated spiropyrazolones via [3 + 2] cycloaddition of difluoroacetohydrazonoyl bromides with alkylidene pyrazolones
Source: Royal Society of Chemistry journal article supplement (doi:10.1039/d4ob00044g), 2024-01-01
Supplement: d4ob00044g1.pdf [file d4ob00044g1.pdf]

## *Supporting Information*

# **Synthesis of Difluoromethylated Spiropyrazolones via [3+2] Cycloaddition of Difluoroacetohydrazoneyl Bromides with Alkylidene Pyrazolones**

Yang Feng, † Yuanyuan Ren, † Duoduo Tang, † Ke-Hu Wang, † Junjiao Wang, † Danfeng Huang, †  
Xiaobo Lv, § Yulai Hu\* † ‡

† College of Chemistry and Chemical Engineering, Northwest Normal University, 967 Anning East Road, Lanzhou 730070, P. R. China

‡ State Key Laboratory of Applied Organic Chemistry, Lanzhou University, Lanzhou 730000, P. R. China

§ Shanghai Sinofluoro Chemicals Co., Ltd., Shanghai 201321, P. R. China

E-mail: huyl@nwnu.edu.cn, huangdf@nwnu.edu.cn

### **Table of Contents**

|                                                                                                                                                          |     |
|----------------------------------------------------------------------------------------------------------------------------------------------------------|-----|
| Synthesis of Difluoroacetohydrazoneyl Bromide <b>1a</b> <sup>1</sup>                                                                                     |     |
| General procedure for the synthesis of trifluoroacetohydrazoneyl bromides <b>5</b> <sup>2,3</sup> .....                                                  | 2   |
| Synthesis of 4-arylidene pyrazolone derivatives <b>2</b> <sup>4</sup> .....                                                                              | 3   |
| References .....                                                                                                                                         | 3   |
| Optimization of asymmetric reaction conditions <sup>a</sup> .....                                                                                        | 4   |
| NMR and HRMS spectra copies of compounds <b>3a–3m</b> , <b>4a–4m</b> , <b>4l–4p</b> and <b>6a–6l</b> .....                                               | 5   |
| HPLC chromatogram of compounds <b>3a</b> , <b>4c</b> , <b>4f</b> , <b>4g</b> : .....                                                                     | 250 |
| Crystallography data of compound ( <i>cis</i> )- <b>3a</b> , ( <i>cis</i> )- <b>3j</b> , ( <i>trans</i> )- <b>3j</b> and ( <i>cis</i> )- <b>6a</b> ..... | 254 |

## Synthesis of Difluoroacetohydrazoneyl Bromide 1a<sup>1</sup>

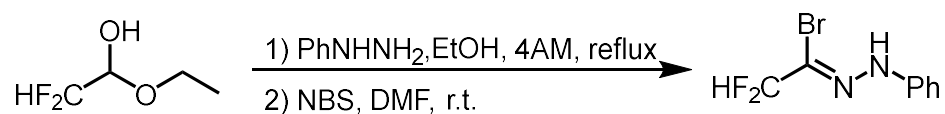

**Step 1:** A mixture of hydrazines (1.0 mmol, 1.0 equiv.), difluoroacetaldehyde ethyl hemiacetal (1.5 mmol, 1.5 equiv.), and freshly activated molecular sieves 4Å in EtOH (8 mL) was stirred at 75 °C in a round-bottom in an oil bath, and the reaction was monitored by TLC. After the reaction was completed, the solvent was removed in vacuo to afford intermediate product, which was used directly for the next step.

**Step 2:** To a solution of crude mixture from step 1 in DMF (8 mL) was added NBS. The resulting solution was stirred at room temperature, and the reaction was monitored by TLC. After the reaction was completed, the reaction was quenched with sat. NaCl aq., and the mixture was extracted with ethyl acetate (3 × 15 mL), dried over MgSO<sub>4</sub>, filtered, and concentrated in vacuo. The resulting products were purified by column chromatography on silica gel (EA)/petroleum ether (PE) (1:10–1:20) to afford difluoroacetohydrazoneyl bromide (76% yields).

## General procedure for the synthesis of trifluoroacetohydrazoneyl bromides 5<sup>2,3</sup>

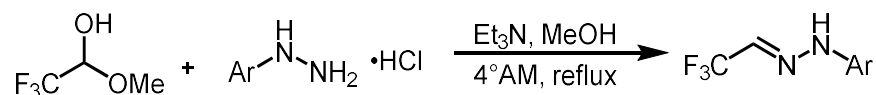

**Step 1:** A mixture of hydrazine hydrochlorides (2.0 mmol, 1.0 equiv.), triethylamine (1.0 mmol, 1.0 equiv.), trifluoroacetaldehyde ethyl hemiacetal (1.5 mmol, 1.5 equiv.), and freshly activated molecular sieves 4 Å in EtOH (8 mL) was stirred at 75 °C in a round-bottom in an oil bath, and the reaction was monitored by TLC. After the reaction was completed, the solvent was removed in vacuo to afford intermediate products, which was used directly for the next step.

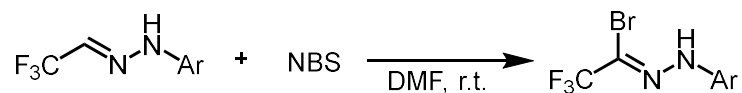

**Step 2:** To a solution of crude mixture from step 1 in DMF (8 mL) was added NBS (2.2 mmol, 1.1 equiv.). The resulting solution was stirred at room temperature, and the reaction was monitored by TLC. After the reaction was completed, the reaction was quenched with sat. NaCl aq., and the mixture was extracted with ethyl acetate (3 x 15 mL), dried over MgSO<sub>4</sub>, filtered, and concentrated in vacuo. The resulting products was purified by column chromatography on silica gel (EA)/petroleum ether (PE) (1:8–1:20) to afford trifluoroacetohydrazoneyl bromides 5.



## Synthesis of 4-arylidene pyrazolone derivatives **2** <sup>4</sup>

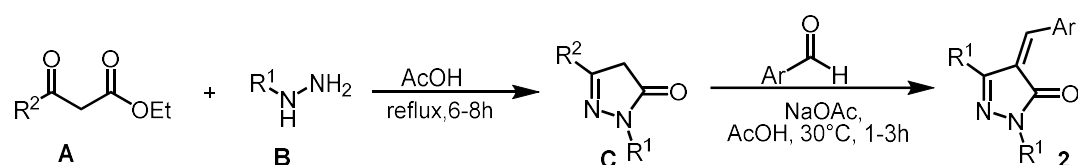

**Step 1:** The solution of corresponding ethyl ester **A** (10 mmol, 1.0 equiv.), hydrazine **B** (11 mmol, 1.1 equiv.) in acetic acid (20 mL) was refluxed in oil bath for 6-8 h, and left to cool. The crude product **C** could be obtained by recrystallization by using acetic acid as a yellow solid, which could be used directly in next step without further purification.

**Step 2:** To a solution of above product **C** (8.0 mmol, 1.0 equiv.) in acetic acid (20 mL) was added aldehyde (8.8 mmol, 1.1 equiv.) and sodium acetate (8.8 mmol, 1.1 equiv.). The mixture was stirred at 30 °C for 1-3 h after completion, H<sub>2</sub>O (50 mL) was added to reaction mixture. The aqueous phase was extracted with EtOAc (3 × 20 mL), dried over sodium sulfate, and concentrated in *vacuo*. The crude residue was subjected to column chromatography (silica gel) using Hexanes/EtOAc (100:1) as eluent.

## References

- [1] Kaneko, S.; Yamazaki, T.; Kitazume, T. A remarkably simple route to versatile difluoromethylated molecules. *J. Org. Chem.* **1993**, *58*, 2302.
- [2] Tanaka, K.; Maeno, S.; Mitsunashi, K. Cycloadditions of *N*-Aryl-C (Trifluoromethyl)nitrilimines with Dimethyl Fumarate and Maleate. *J. Heterocyclic Chem.* **1985**, *22*, 565.
- [3] Mloston, G.; Urbaniak, K.; Utecht, G.; Lentz, D.; Jasinski, M. Trifluoromethylated 2,3-dihydro-1,3,4-thiadiazoles via the regioselective [3+2]-cycloadditions of fluorinated nitrile imines with aryl, hetaryl, and ferrocenyl thioketones. *J. Fluor. Chem.* **2016**, *192*, 147.
- [4]. Khairnar, P. V.; Su, Y.-H.; Chen, Y.-C.; Edukondalu, A.; Chen, Y.-R.; Lin, W. Organophosphane-Catalyzed Direct  $\beta$ -Acylation of 4-Arylidene Pyrazolones and 5-Arylidene Thiazolones with Acyl Chlorides. *Org. Lett.* **2020**, *22*, 6868.

## Optimization of asymmetric reaction conditions <sup>a</sup>

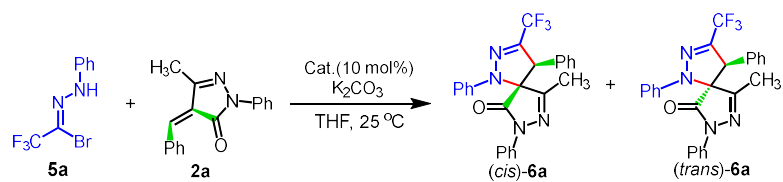

| Entry    | Cat | Total Yield <sup>b</sup> (%) | (cis)-6a/(trans)-6a |
|----------|-----|------------------------------|---------------------|
| <b>1</b> |     | 77                           | 2.3:1.0             |
| <b>2</b> |     | 20                           | 4.0:1.0             |
| <b>3</b> |     | 95                           | 2.0:1.0             |
| <b>4</b> |     | 49                           | 2.8:1.0             |
| <b>5</b> |     | 81                           | 1.0:1.4             |

<sup>a</sup>Reactions were performed with **1a** (0.12 mmol, 1.2 equiv.), **2a** (0.1 mmol, 1.0 equiv.), and  $K_2CO_3$  (0.12 mmol, 1.2 equiv.) in solvent (3.0 mL) at 25 °C in metal bath for 12 h. <sup>b</sup>Isolated yield.

# NMR and HRMS spectra copies of compounds 3a–3m, 4a–4m ,4l–4p and 6a–6l

NMR copies of compound (*trans*)-3a:

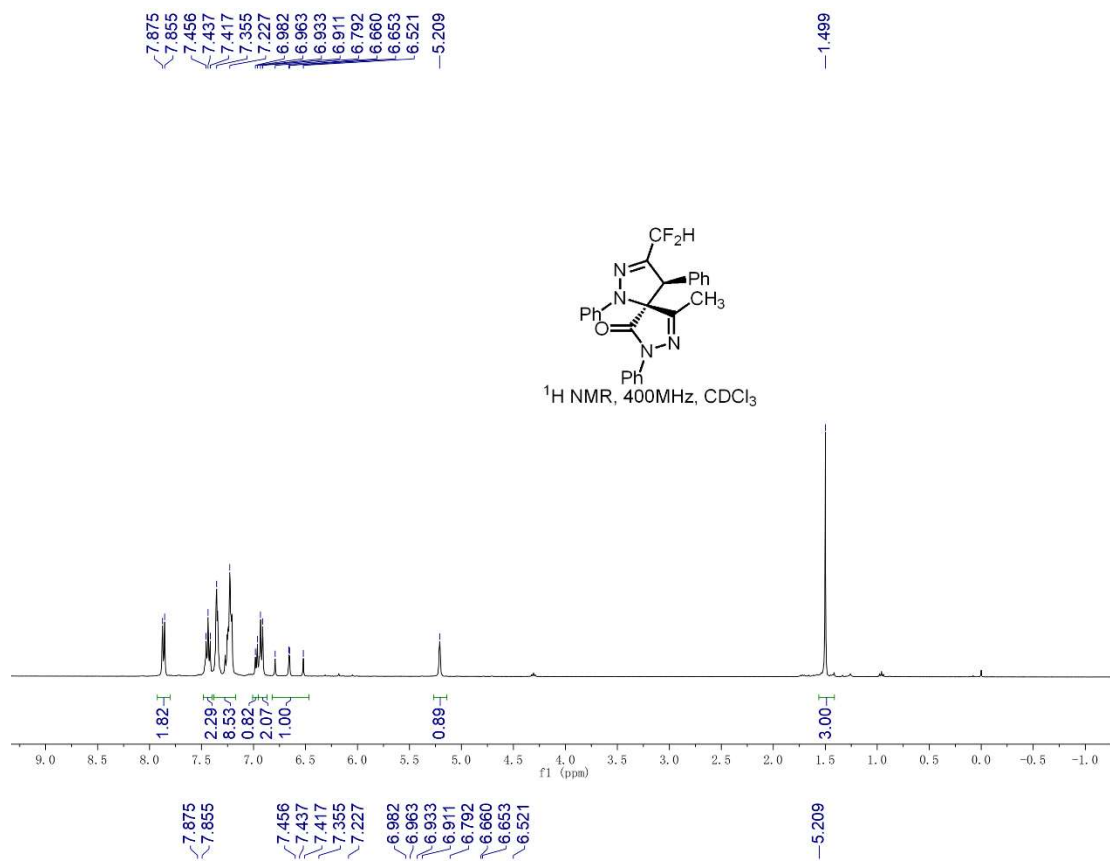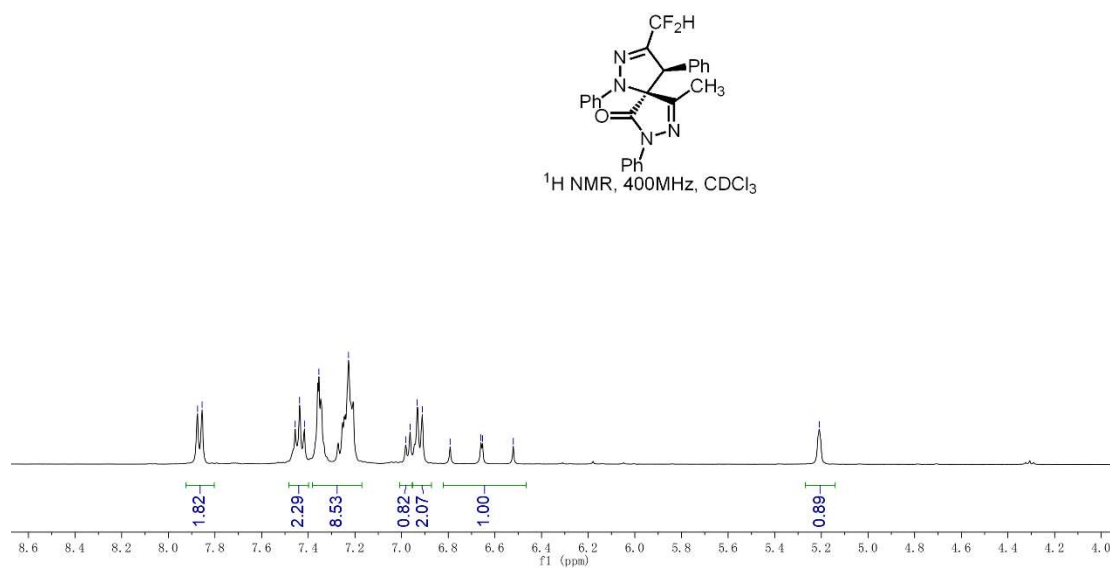

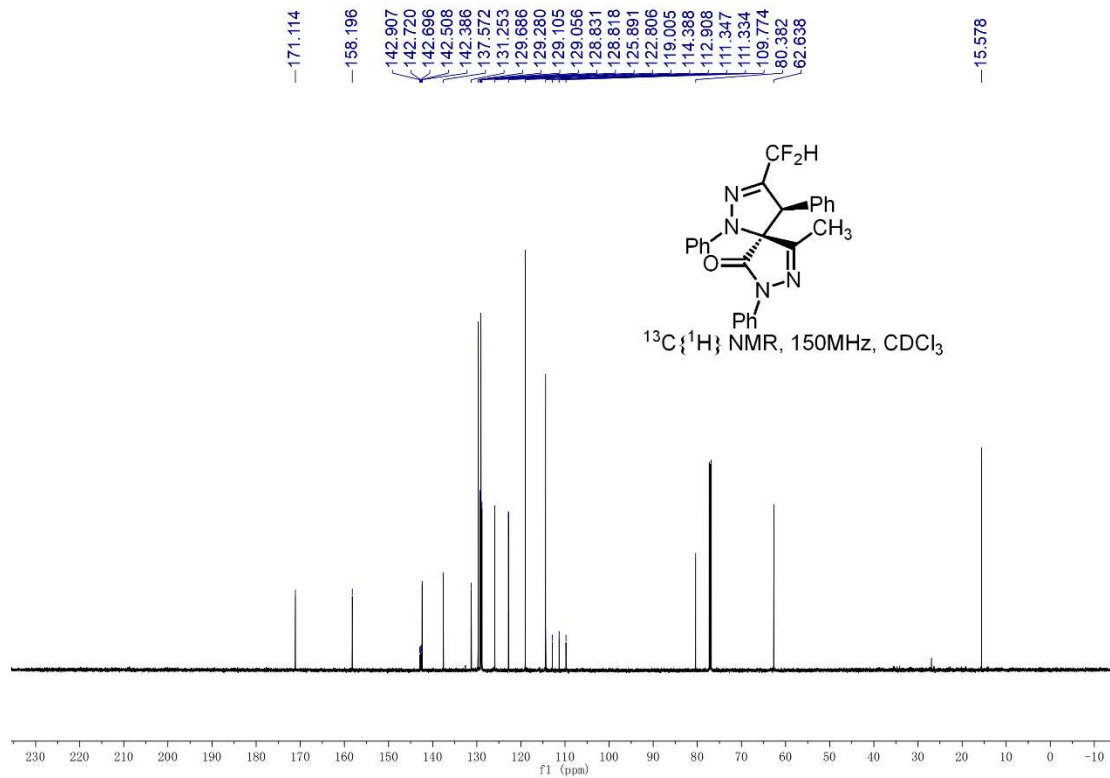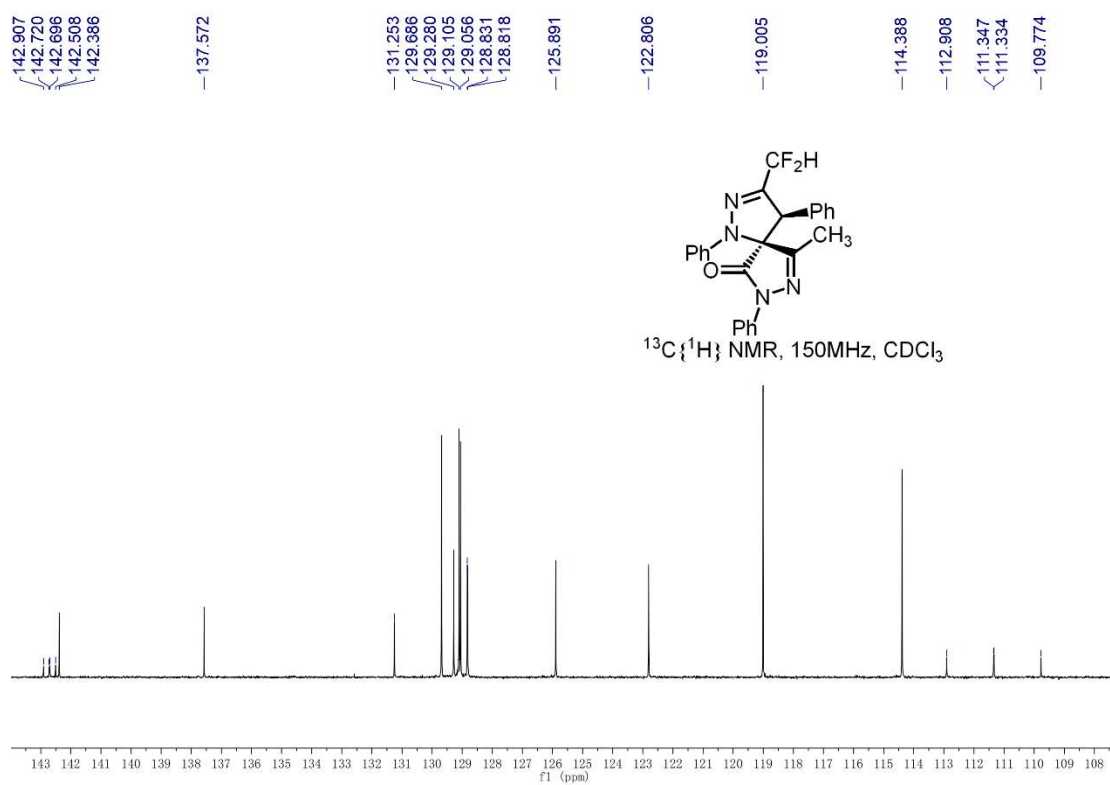

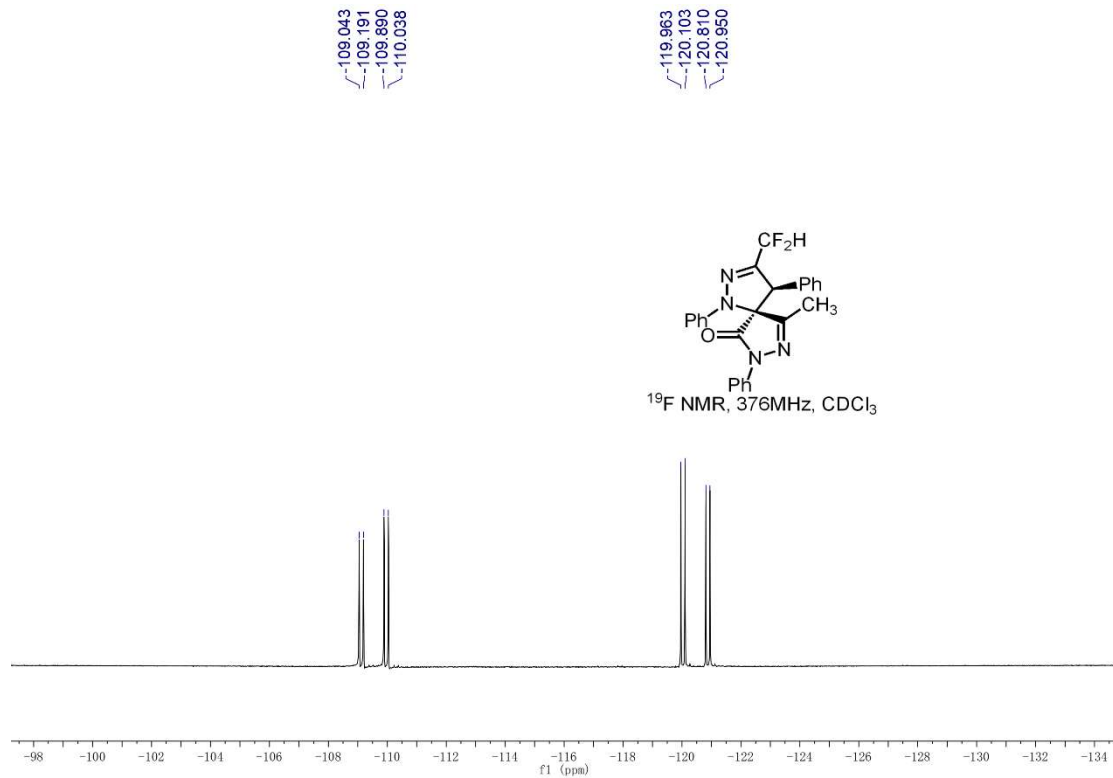

HRMS (ESI) copy of compound ((*trans*)-**3a**):

### Mass Spectrum SmartFormula Report

**Analysis Info**

Analysis Name D:\Data\user\fengyang 20220616-11.d  
 Method tune\_low.m  
 Sample Name A-1  
 Comment

Acquisition Date 2022-6-16 10:47:19

Operator BDAL@DE  
 Instrument / Ser# micrOTOF-Q 20453

**Acquisition Parameter**

|             |          |                       |           |                  |           |
|-------------|----------|-----------------------|-----------|------------------|-----------|
| Source Type | ESI      | Ion Polarity          | Positive  | Set Nebulizer    | 0.4 Bar   |
| Focus       | Active   | Set Capillary         | 4500 V    | Set Dry Heater   | 180 jA°C  |
| Scan Begin  | 100 m/z  | Set End Plate Offset  | -500 V    | Set Dry Gas      | 2.0 l/min |
| Scan End    | 1000 m/z | Set Collision Cell RF | 300.0 Vpp | Set Divert Valve | Waste     |

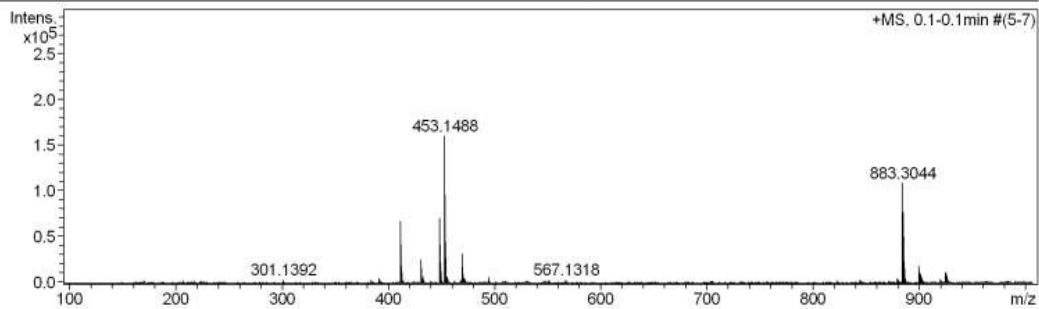

| Meas. m/z | # | Formula                                                           | m/z      | err [ppm] | Mean err [ppm] | rdb  | N-R | e j ≠ Conf | mS  | Std | Std | Std | Std | Std   | Std |
|-----------|---|-------------------------------------------------------------------|----------|-----------|----------------|------|-----|------------|-----|-----|-----|-----|-----|-------|-----|
|           |   |                                                                   |          |           |                |      |     |            |     |     |     |     |     |       |     |
| 453.1488  | 1 | C <sub>25</sub> H <sub>20</sub> F <sub>2</sub> N <sub>4</sub> NaO | 453.1497 | 2.1       | 2.1            | 16.5 | ok  | even       | 3.1 | 4.3 | 1.1 | 1.9 | 0.3 | 842.7 |     |

NMR copies of compound (*cis*)-**3a**:

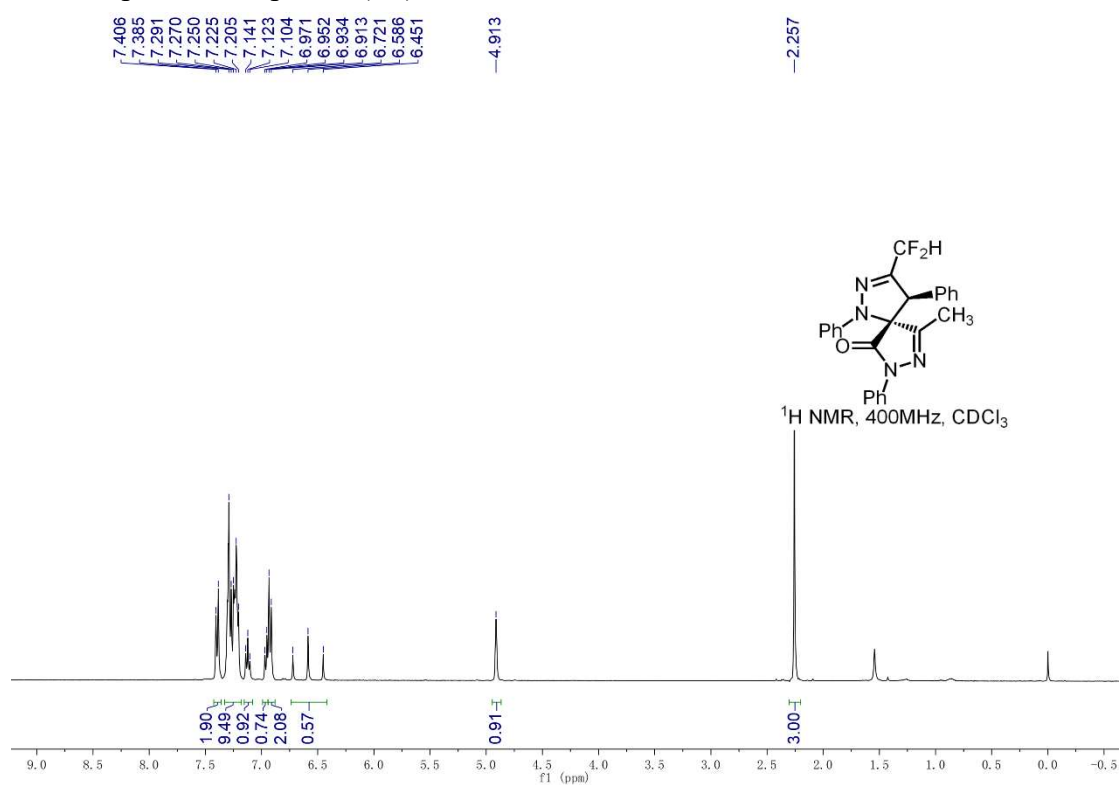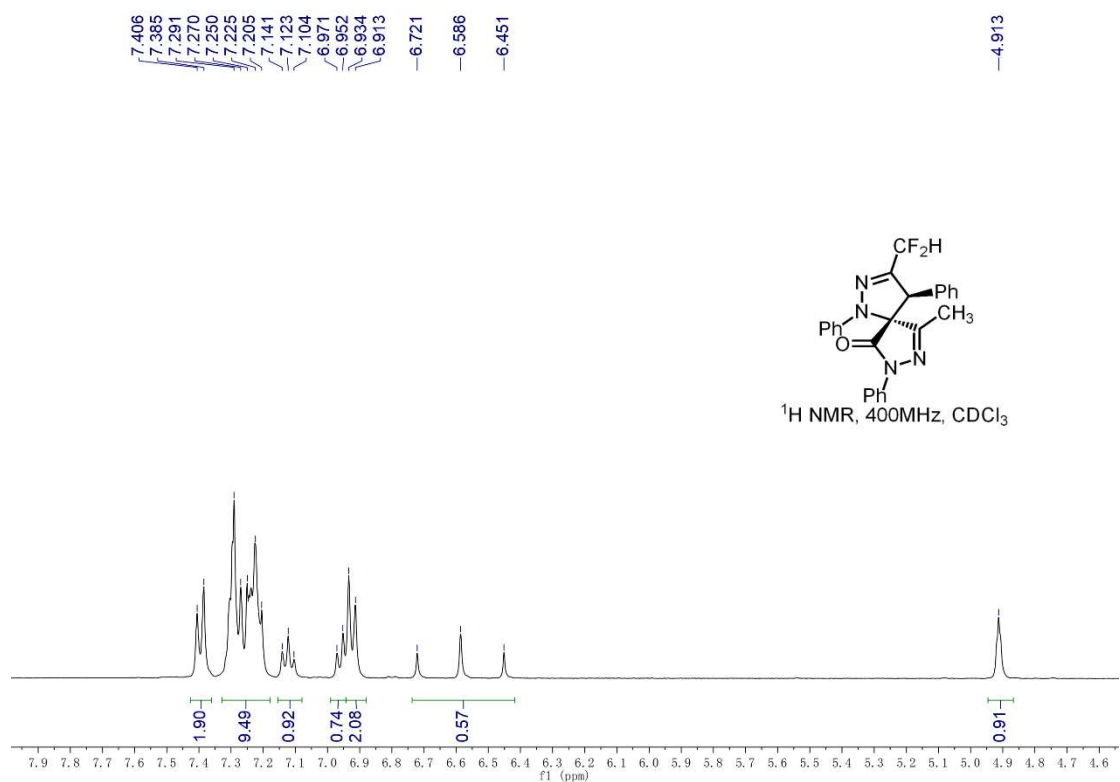

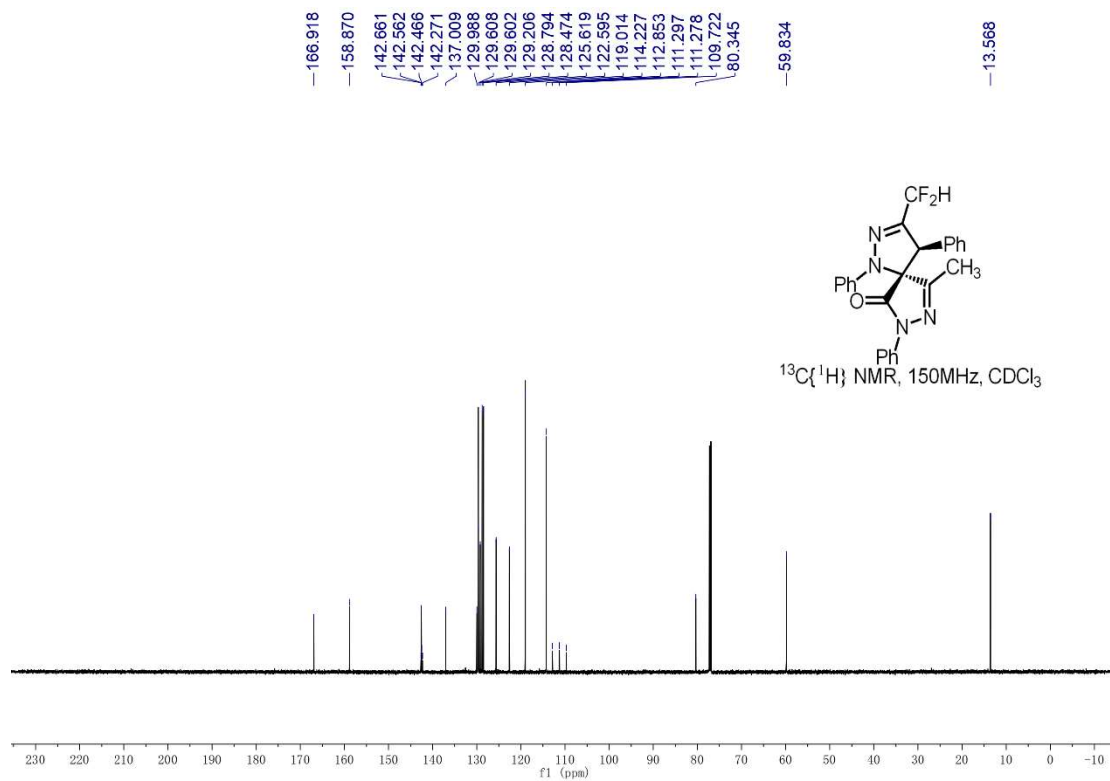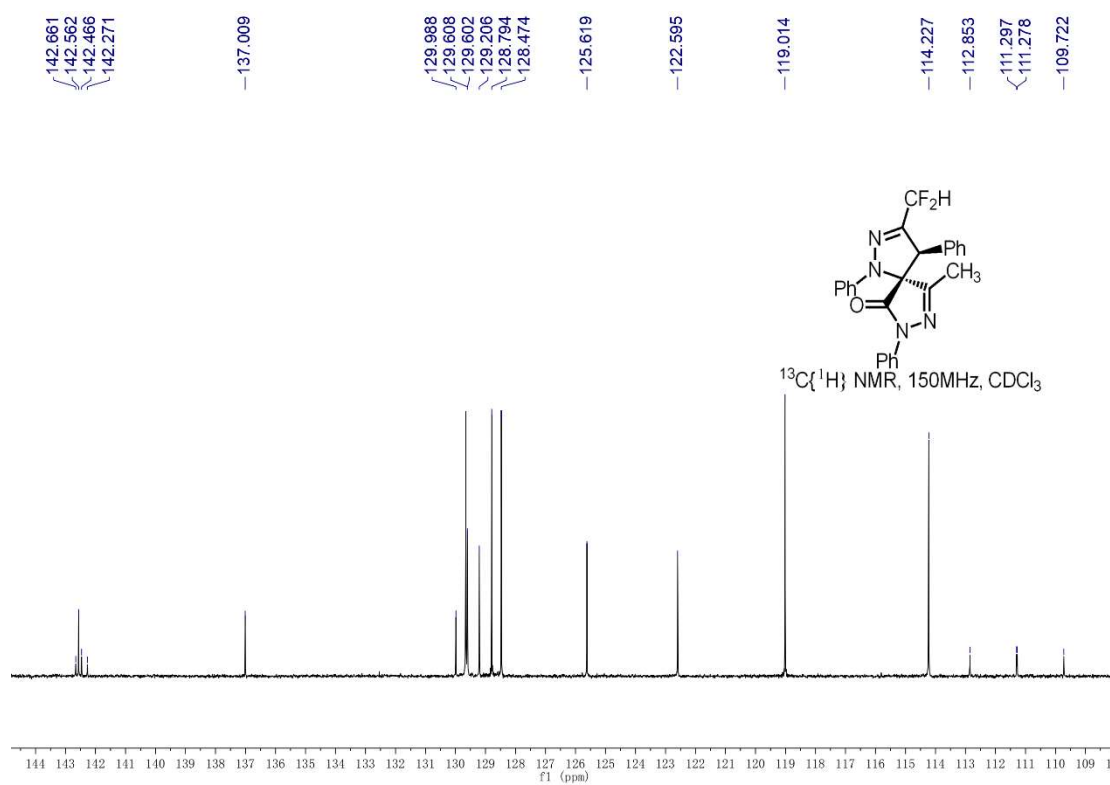

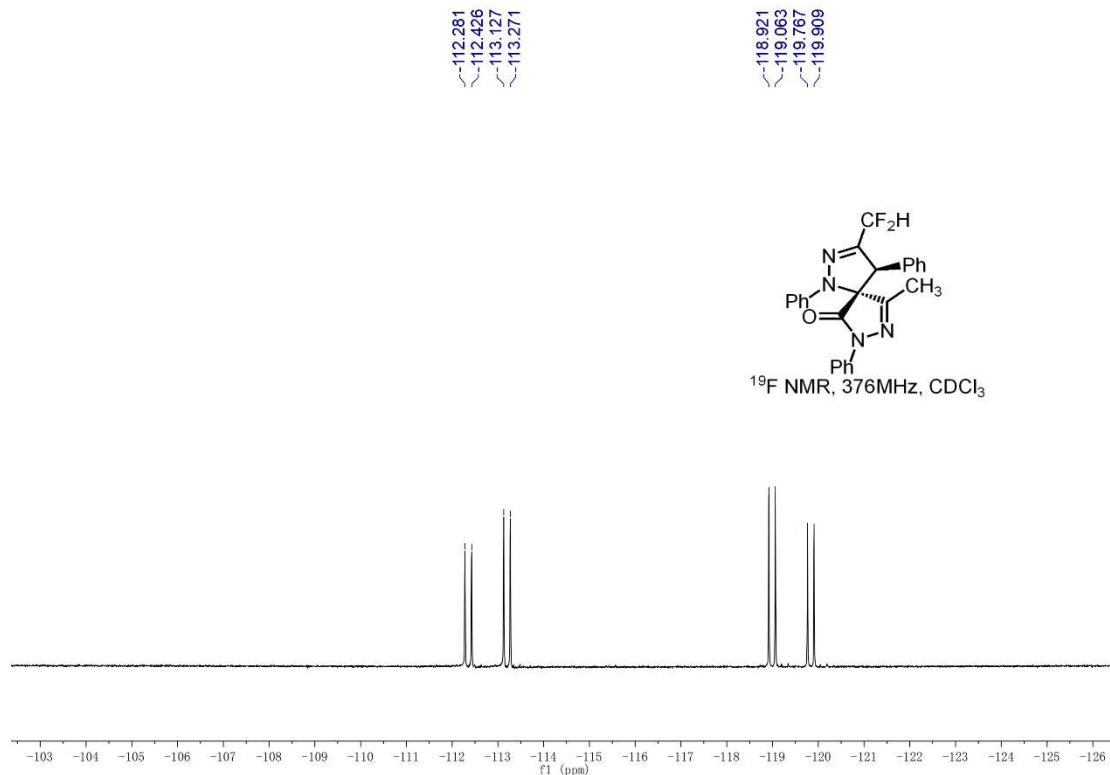

HRMS (ESI) copy of compound (*cis*)-**3a**:

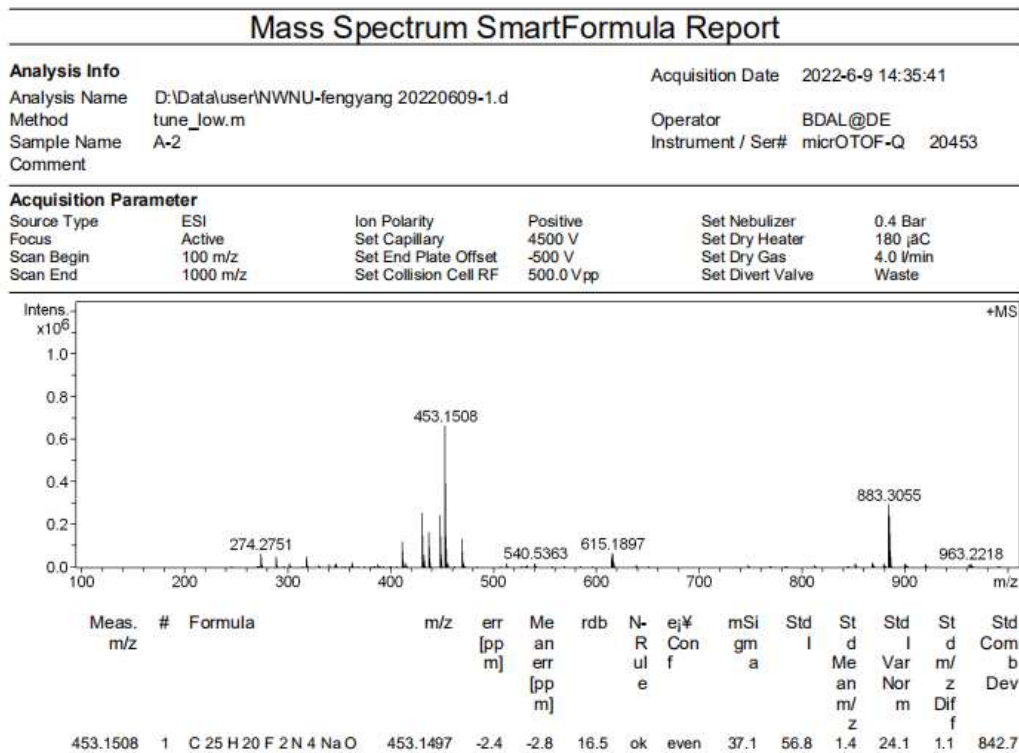



NMR copies of compound (*trans*)-**3b**:

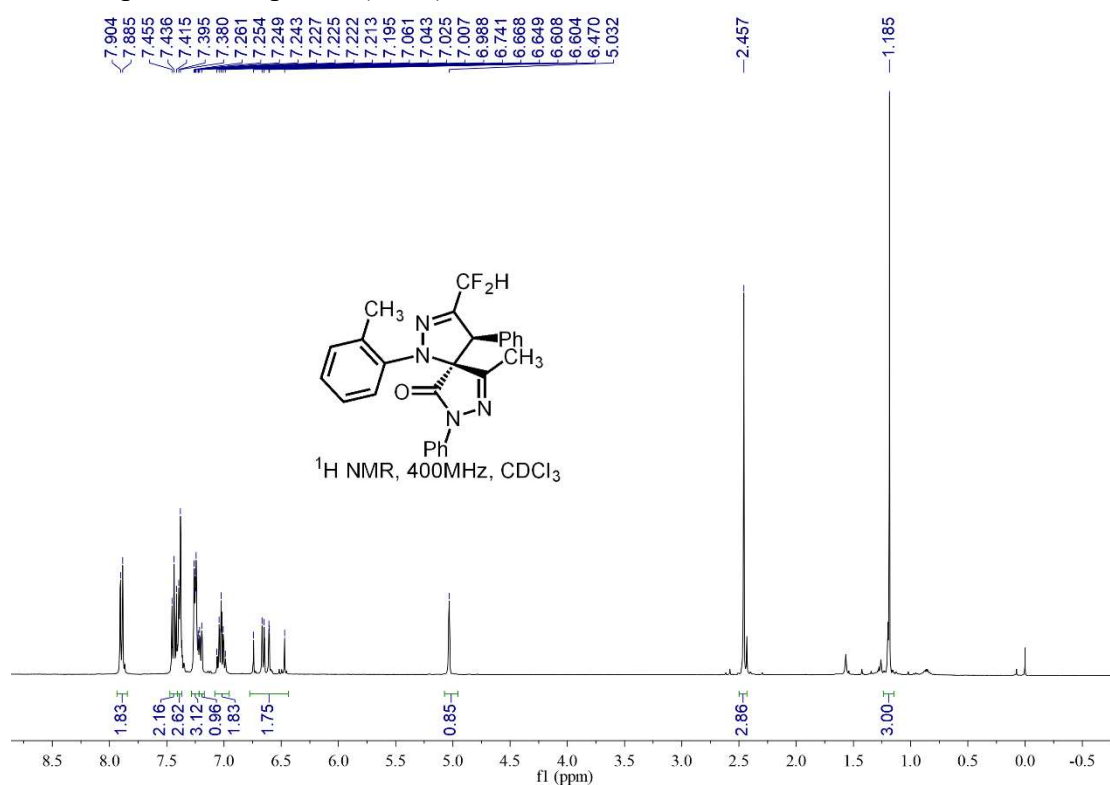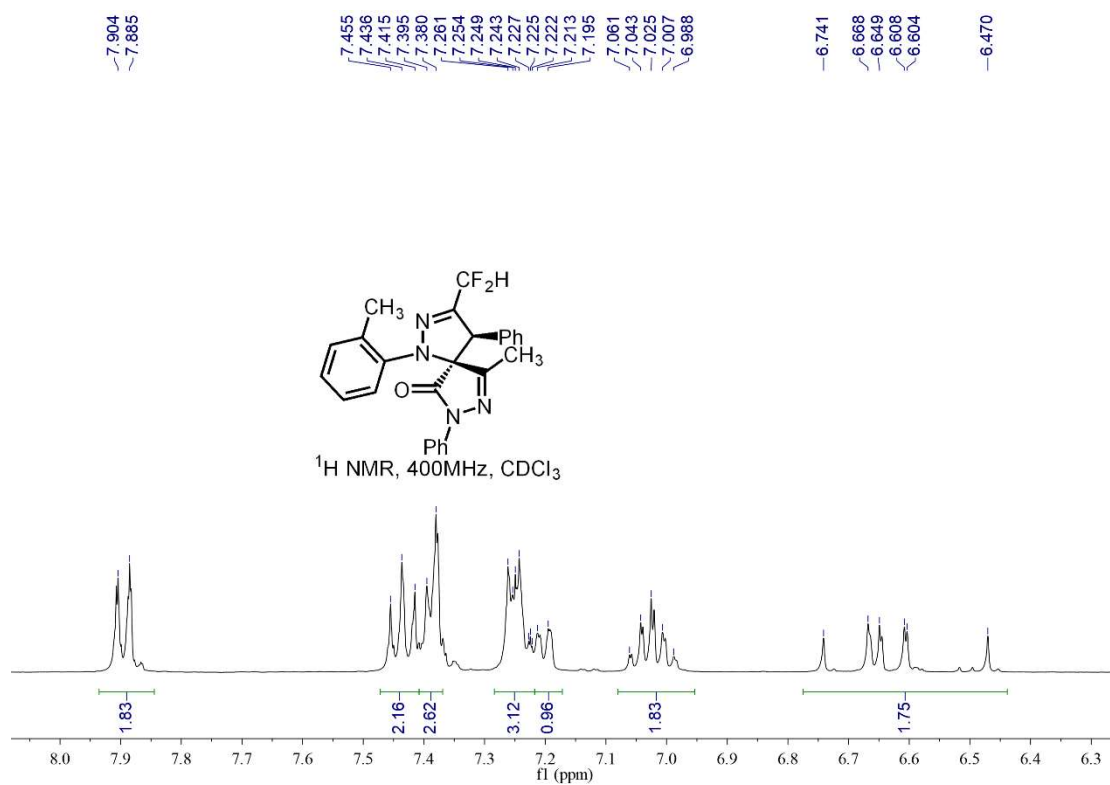

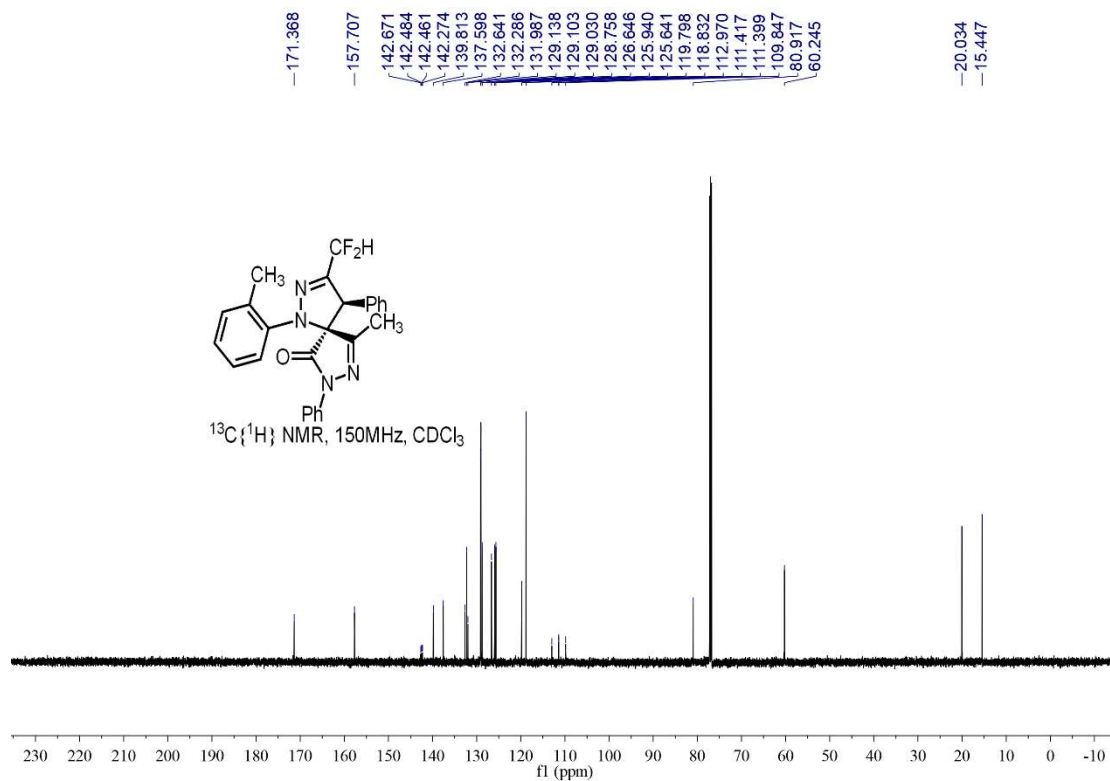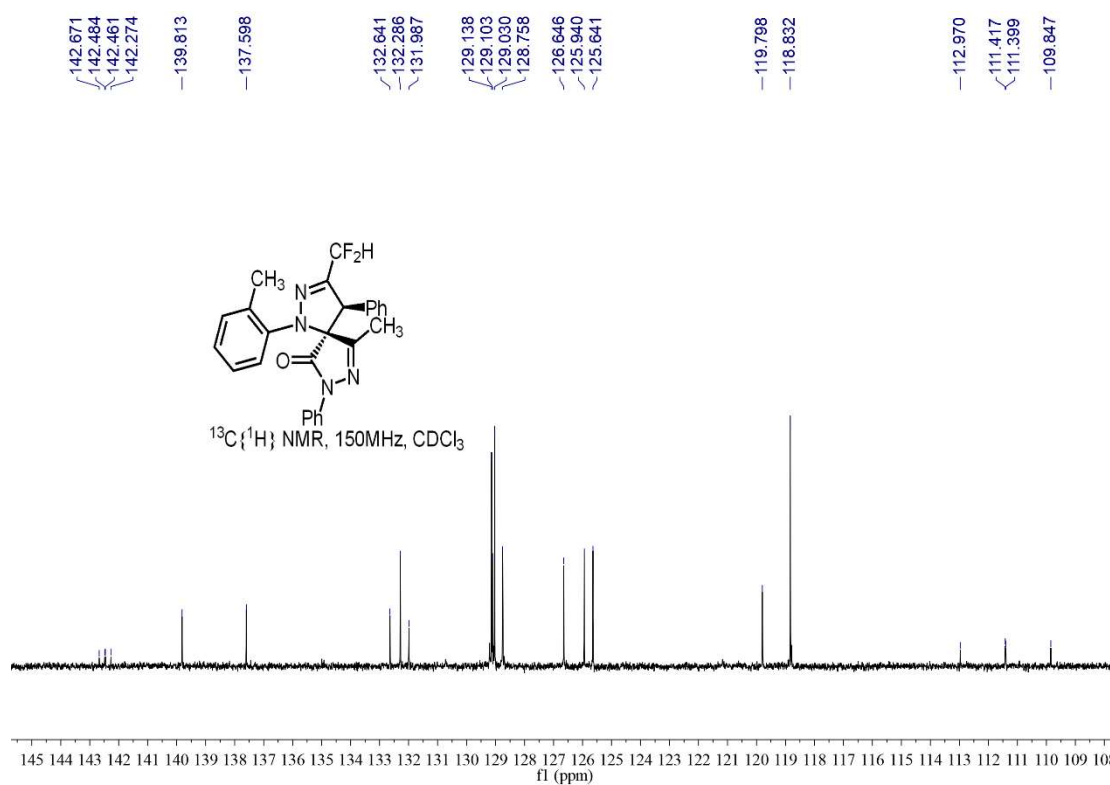

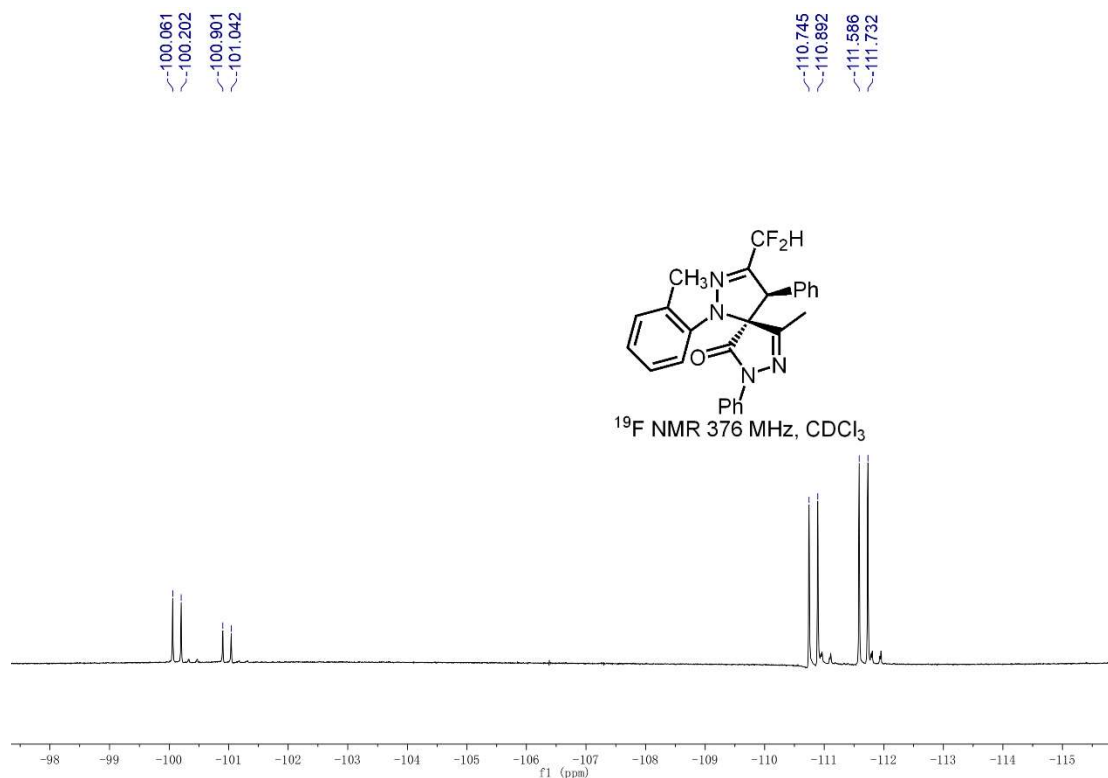

HRMS (ESI) copy of compound (*trans*)-**3b**:

### Mass Spectrum SmartFormula Report

**Analysis Info**

Analysis Name D:\Data\user\NWNNU-fengyang 20220609-6.d  
 Method tune\_low.m  
 Sample Name A-20  
 Comment

Acquisition Date 2022-6-9 14:46:41  
 Operator BDAL@DE  
 Instrument / Ser# micrOTOF-Q 20453

**Acquisition Parameter**

|             |          |                       |           |                  |           |
|-------------|----------|-----------------------|-----------|------------------|-----------|
| Source Type | ESI      | Ion Polarity          | Positive  | Set Nebulizer    | 0.4 Bar   |
| Focus       | Active   | Set Capillary         | 4500 V    | Set Dry Heater   | 180 j°C   |
| Scan Begin  | 100 m/z  | Set End Plate Offset  | -500 V    | Set Dry Gas      | 4.0 l/min |
| Scan End    | 1000 m/z | Set Collision Cell RF | 500.0 Vpp | Set Divert Valve | Waste     |

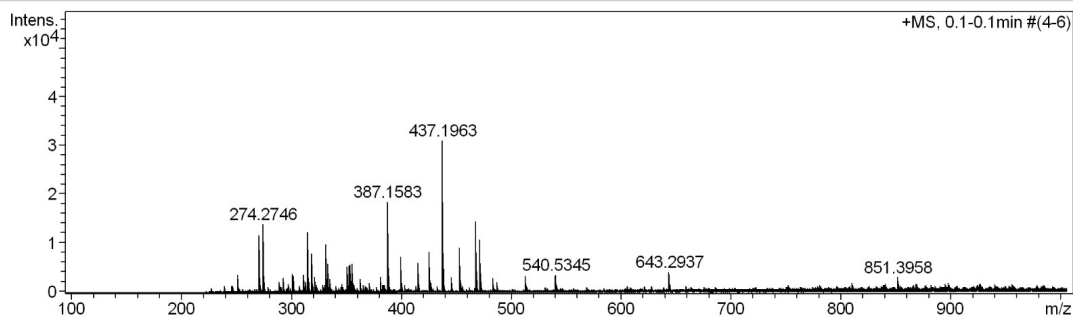

| Meas. #  | Formula                                                           | m/z      | err [ppm] | Me an err [ppm] | rdb  | N-R | e; Con | mSi gm | Std l | St d      | Std l     | St d  | Std Com |
|----------|-------------------------------------------------------------------|----------|-----------|-----------------|------|-----|--------|--------|-------|-----------|-----------|-------|---------|
| m/z      |                                                                   |          |           |                 |      | ul  | f      | a      |       | Me an m/z | Var Nor m | Dif z | b Dev   |
| 467.1660 | C <sub>26</sub> H <sub>22</sub> F <sub>2</sub> N <sub>4</sub> NaO | 467.1654 | -1.2      | -1.7            | 16.5 | ok  | even   | 24.7   | 33.1  | 0.9       | 26.0      | 0.9   | 842.7   |

NMR copies of compound (*cis*)-**3b**:

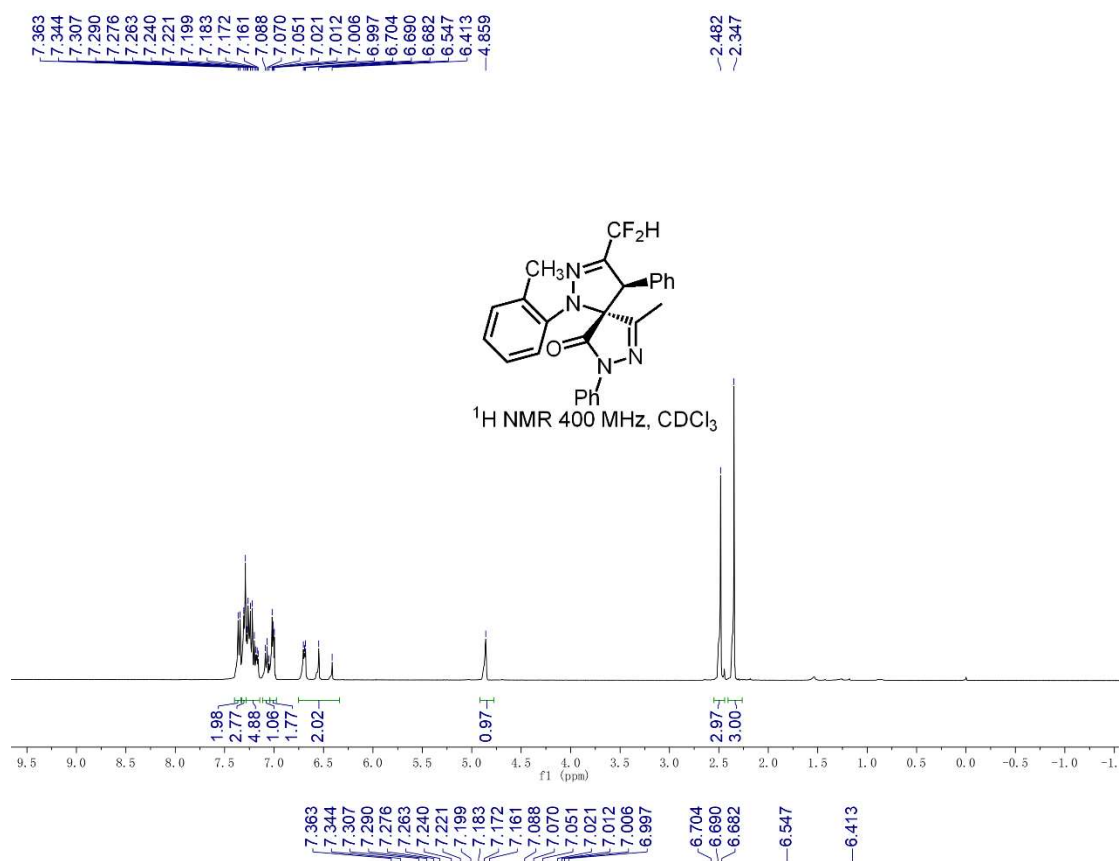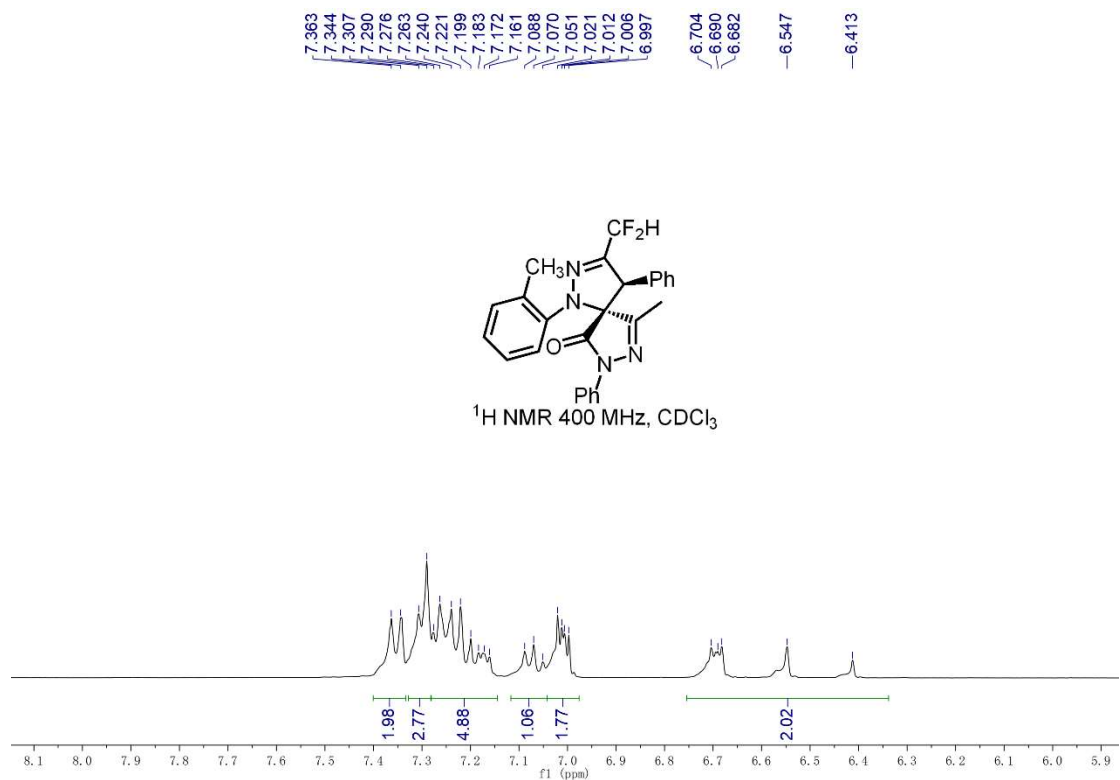

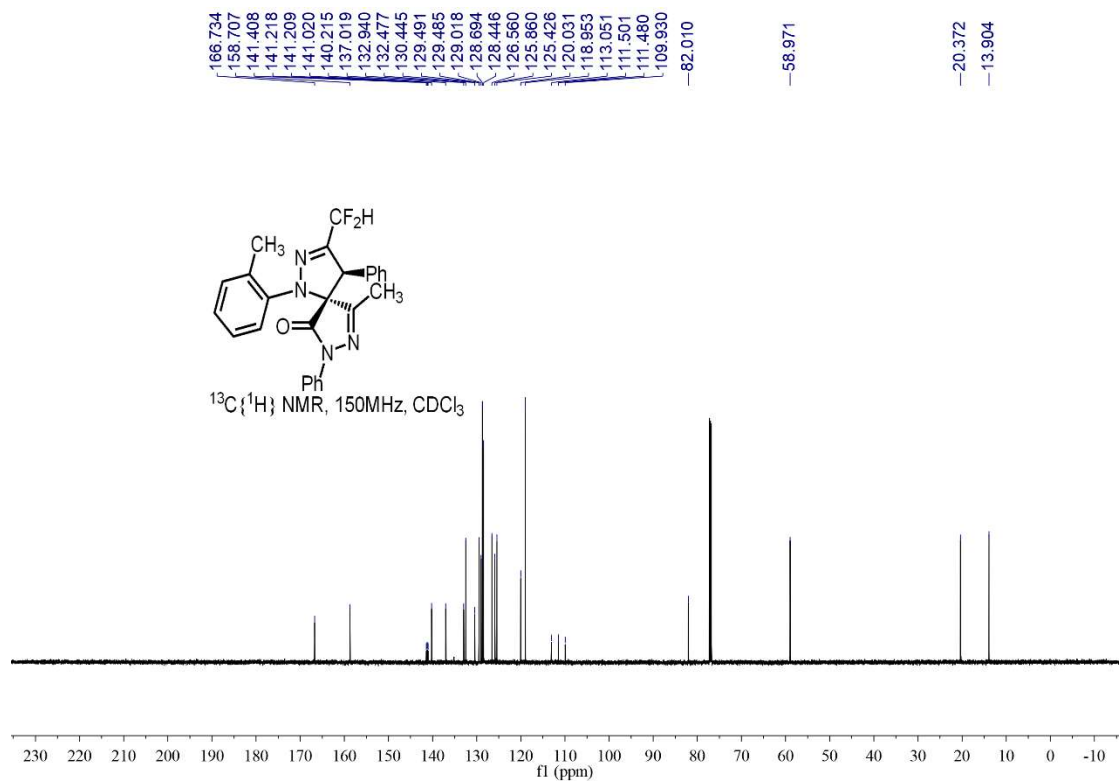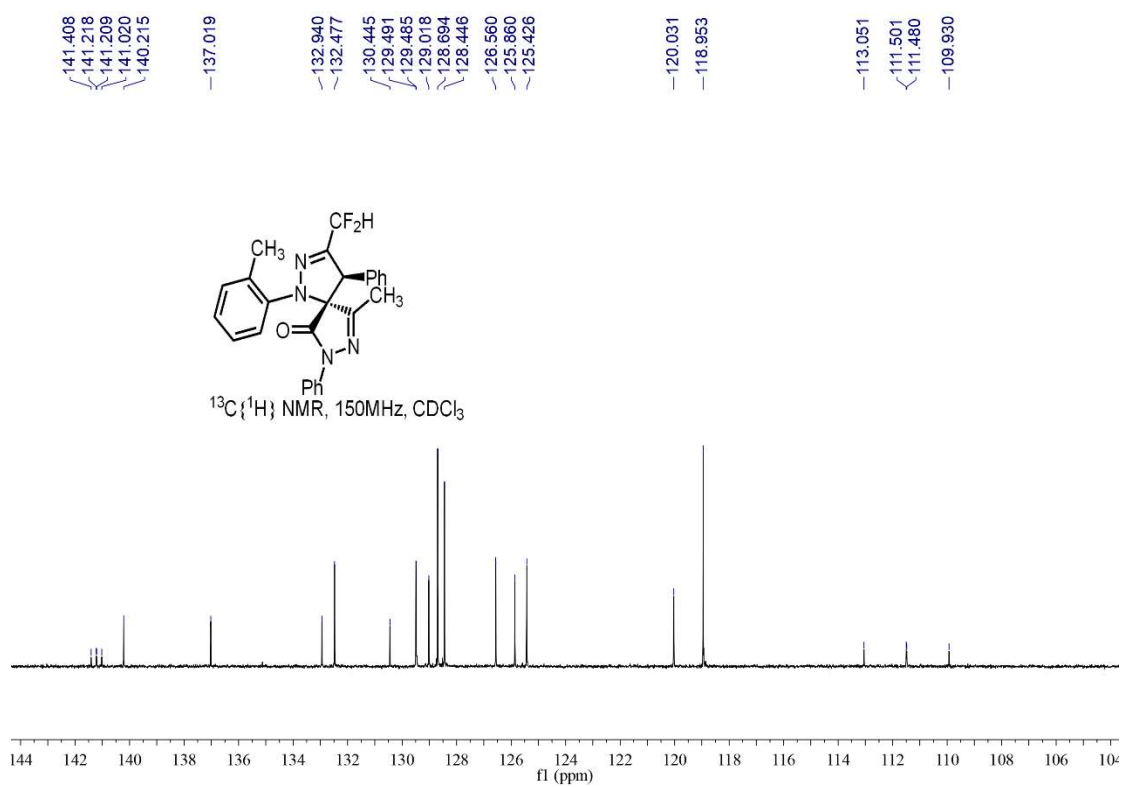

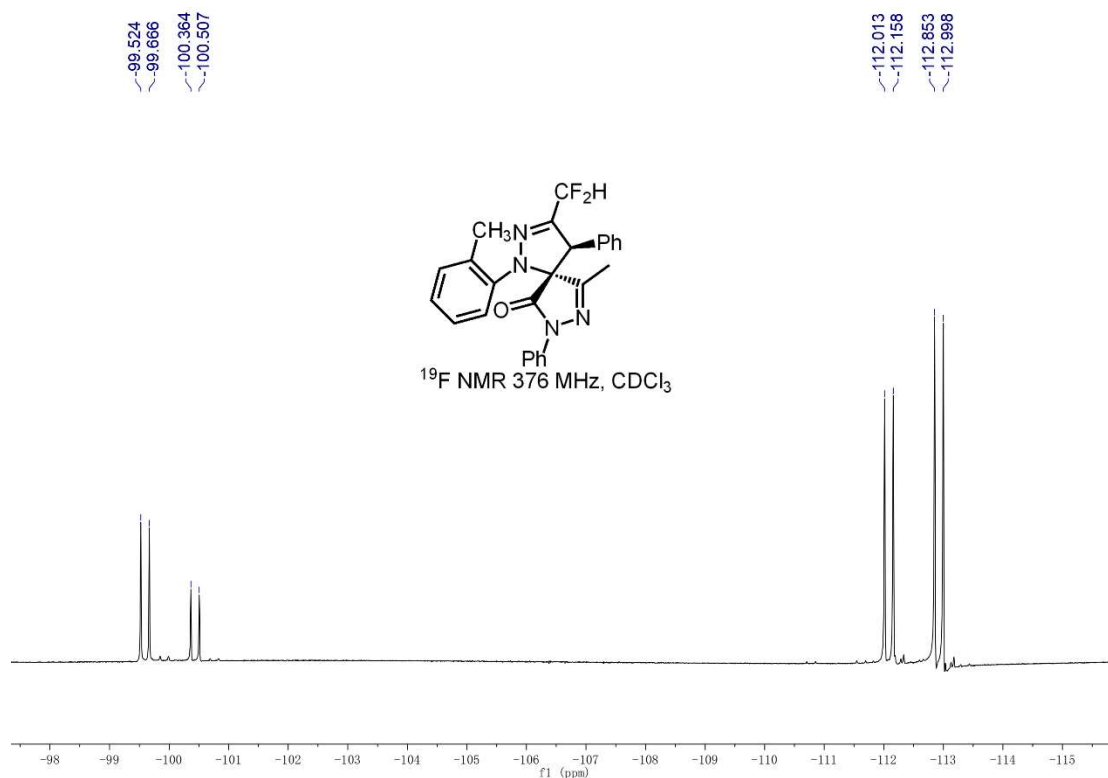

HRMS (ESI) copy of compound (*cis*)-**3b**:

### Mass Spectrum SmartFormula Report

**Analysis Info**

Analysis Name D:\Data\user\NWNW-fengyang 20220609--7.d  
 Method tune\_low.m  
 Sample Name A-201  
 Comment

Acquisition Date 2022-6-9 14:49:12  
 Operator BDAL@DE  
 Instrument / Ser# micrOTOF-Q 20453

**Acquisition Parameter**

|             |          |                       |           |                  |           |
|-------------|----------|-----------------------|-----------|------------------|-----------|
| Source Type | ESI      | Ion Polarity          | Positive  | Set Nebulizer    | 0.4 Bar   |
| Focus       | Active   | Set Capillary         | 4500 V    | Set Dry Heater   | 180 j°C   |
| Scan Begin  | 100 m/z  | Set End Plate Offset  | -500 V    | Set Dry Gas      | 4.0 l/min |
| Scan End    | 1000 m/z | Set Collision Cell RF | 500.0 Vpp | Set Divert Valve | Waste     |

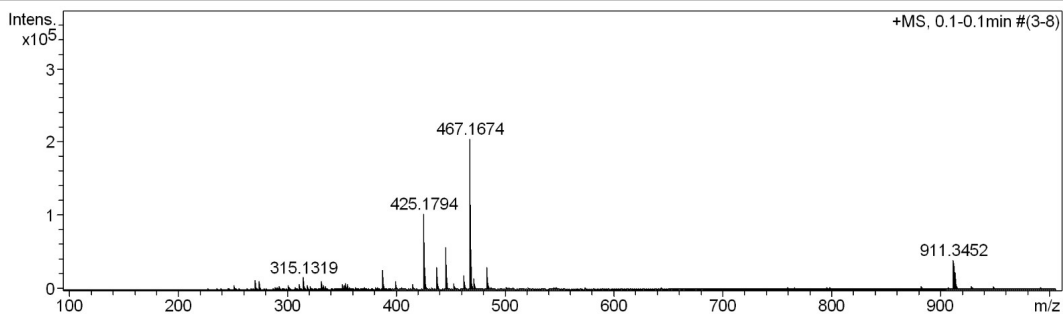

| Meas. #  | Formula                                                             | m/z      | err [ppm] | Me an err [ppm] | rdb  | N-R | e <sub>i</sub> % | Con | mSi gm | Std l | St d Me an m/z | Std l Var m | Std d m/z Dif | Std Com b Dev |
|----------|---------------------------------------------------------------------|----------|-----------|-----------------|------|-----|------------------|-----|--------|-------|----------------|-------------|---------------|---------------|
| 467.1674 | 1 C <sub>26</sub> H <sub>22</sub> F <sub>2</sub> N <sub>4</sub> NaO | 467.1654 | -4.4      | -4.5            | 16.5 | ok  | even             |     | 17.3   | 25.6  | 2.1            | 10.9        | 0.4           | 842.7         |

NMR copies of compound (*trans*)-3c:

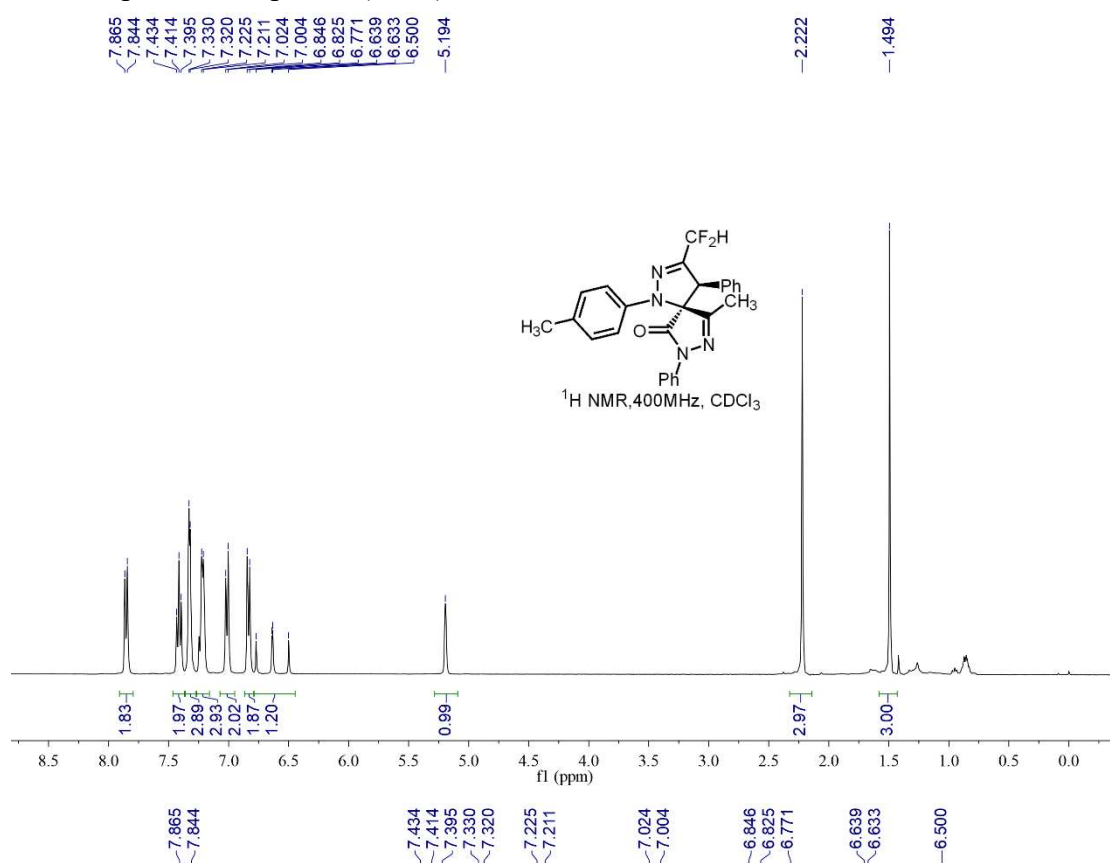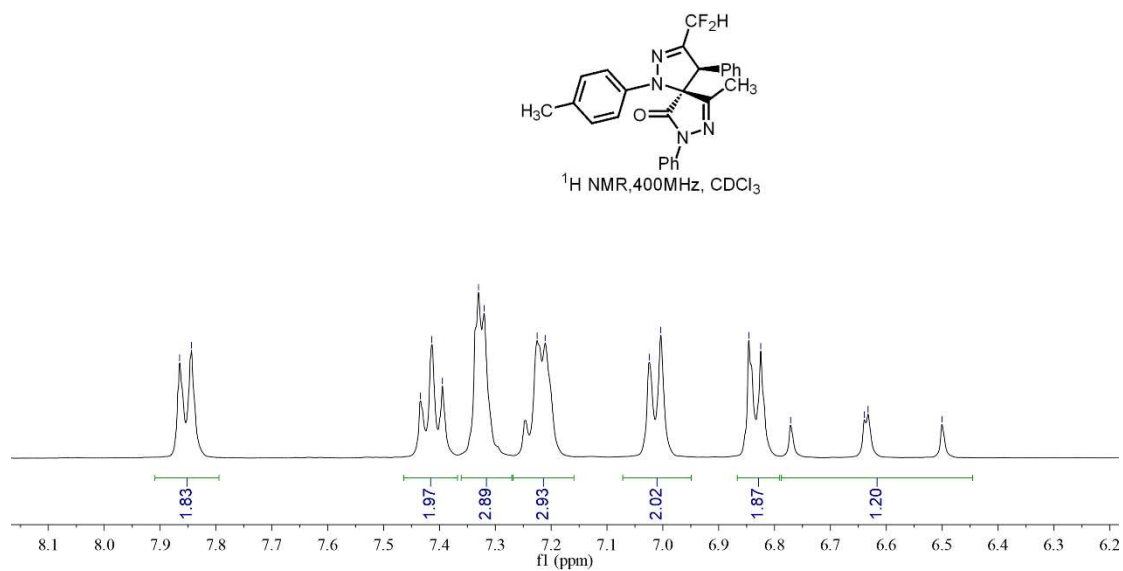

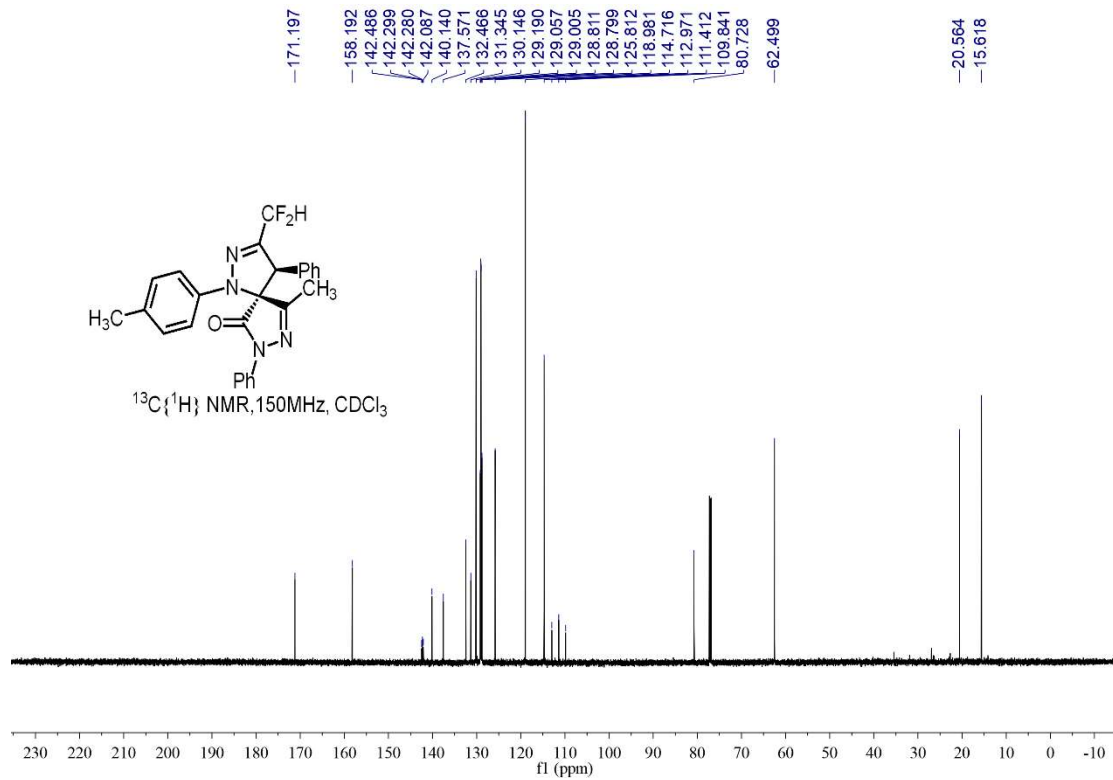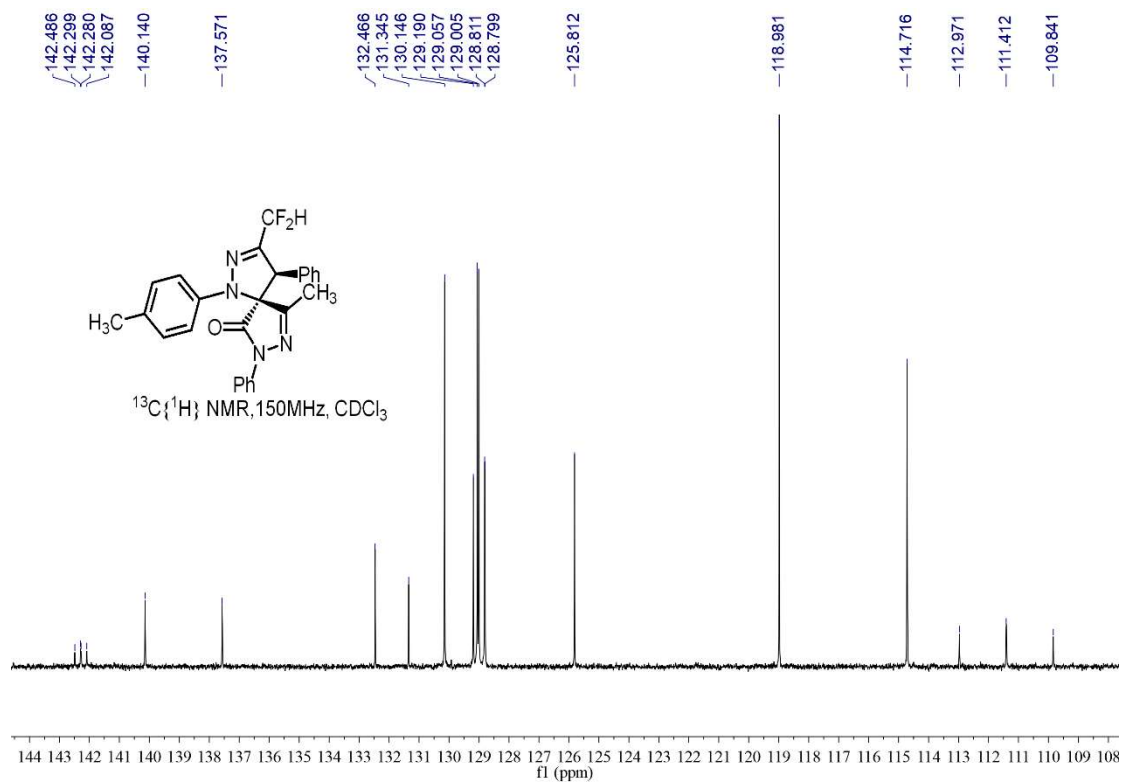



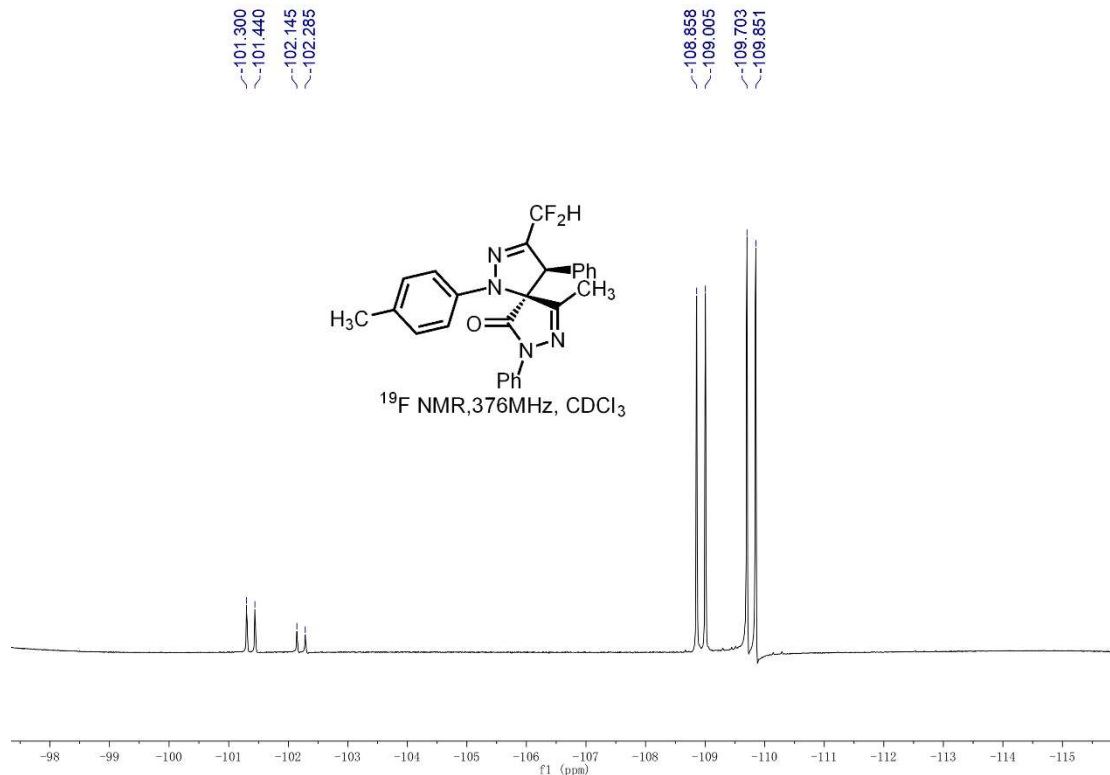

HRMS (ESI) copy of compound (*trans*)-**3c**:

### Mass Spectrum SmartFormula Report

**Analysis Info**

Analysis Name D:\Data\user\fengyang 20220616-12.d  
 Method tune\_low.m  
 Sample Name A-14  
 Comment

Acquisition Date 2022-6-16 10:50:36  
 Operator BDAL@DE  
 Instrument / Ser# micrOTOF-Q 20453

**Acquisition Parameter**

|             |          |                       |           |                  |                   |
|-------------|----------|-----------------------|-----------|------------------|-------------------|
| Source Type | ESI      | Ion Polarity          | Positive  | Set Nebulizer    | 0.4 Bar           |
| Focus       | Active   | Set Capillary         | 4500 V    | Set Dry Heater   | 180 $\mu\text{A}$ |
| Scan Begin  | 100 m/z  | Set End Plate Offset  | -500 V    | Set Dry Gas      | 2.0 l/min         |
| Scan End    | 1000 m/z | Set Collision Cell RF | 300.0 Vpp | Set Divert Valve | Waste             |

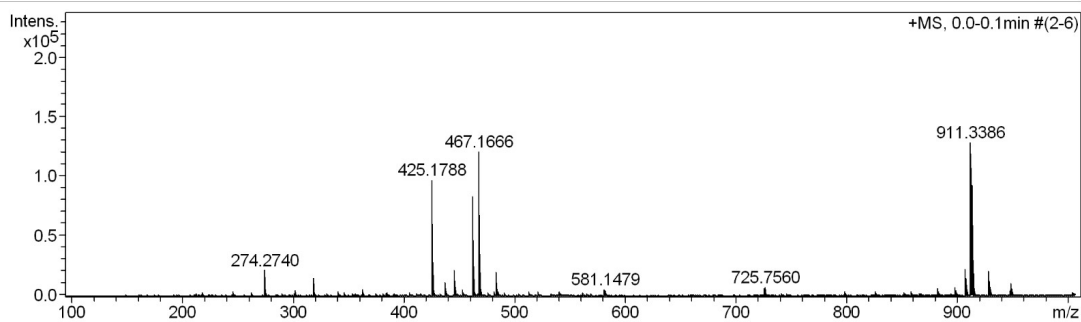

| Meas. #  | Formula                                                             | m/z      | err [ppm] | Me an err [ppm] | rdb  | N- R | e; % Conf | mS ig ma | Std l | Std Me an Va z or m | Std l m/ z Diff | Std Com b Dev |       |
|----------|---------------------------------------------------------------------|----------|-----------|-----------------|------|------|-----------|----------|-------|---------------------|-----------------|---------------|-------|
| 467.1666 | 1 C <sub>26</sub> H <sub>22</sub> F <sub>2</sub> N <sub>4</sub> NaO | 467.1654 | -2.5      | -2.8            | 16.5 | ok   | even      | 3.8      | 4.9   | 1.5                 | 2.7             | 1.0           | 842.7 |

NMR copies of compound (*cis*)-**3c**:

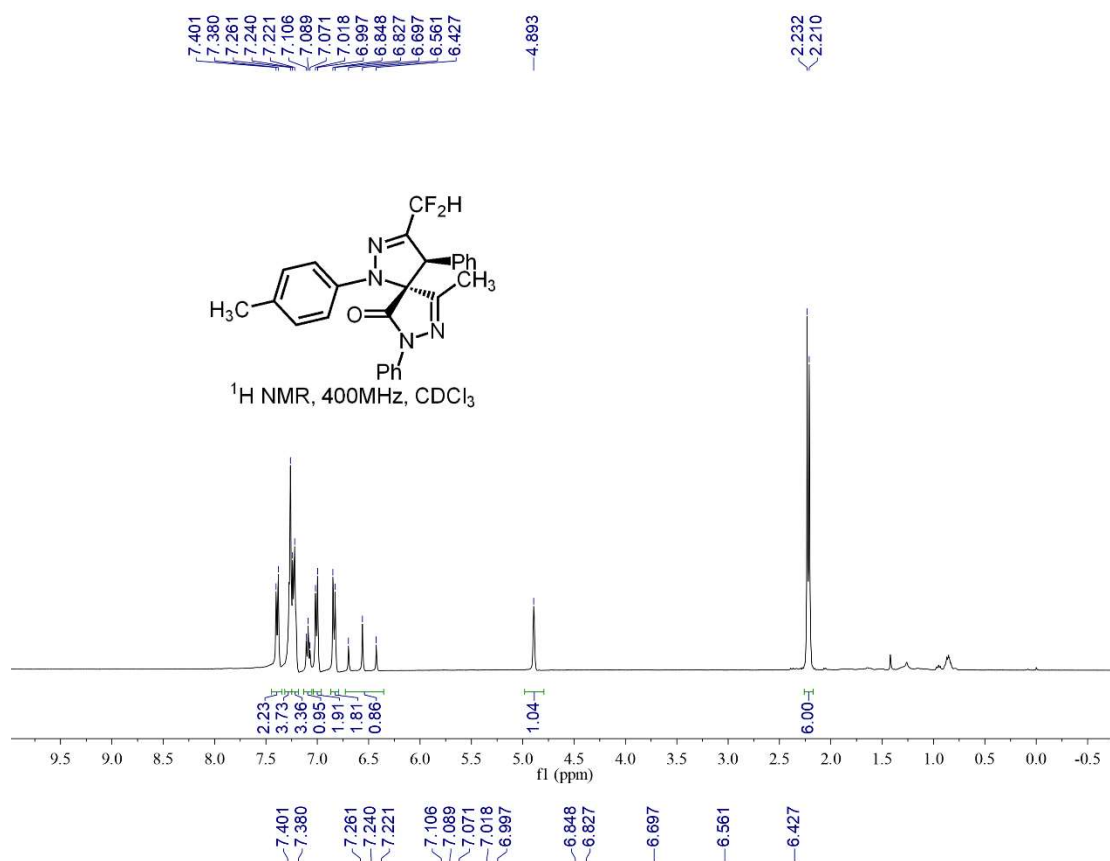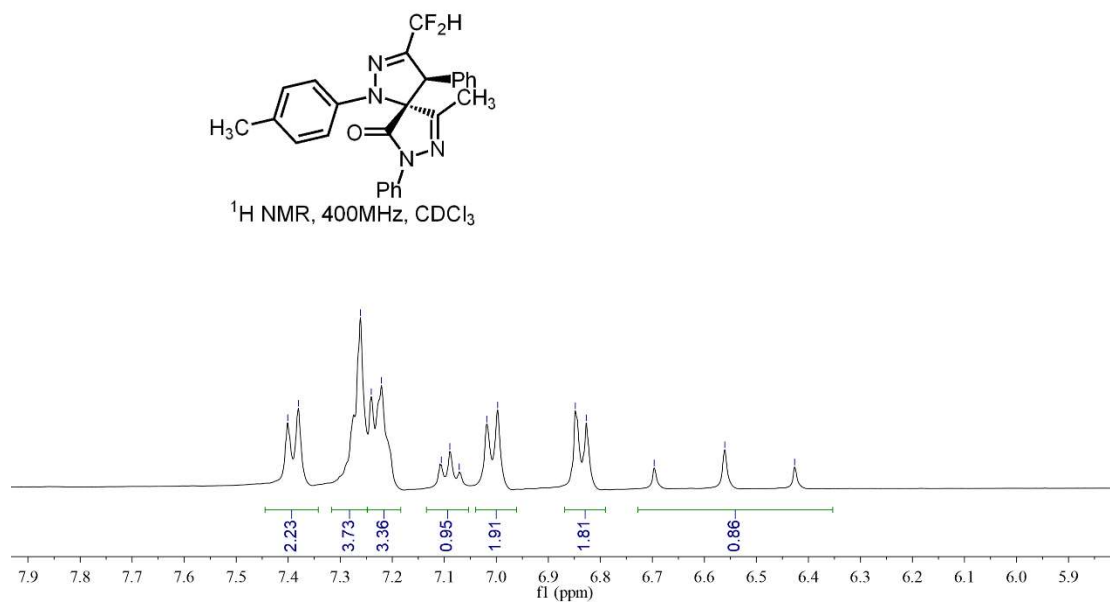

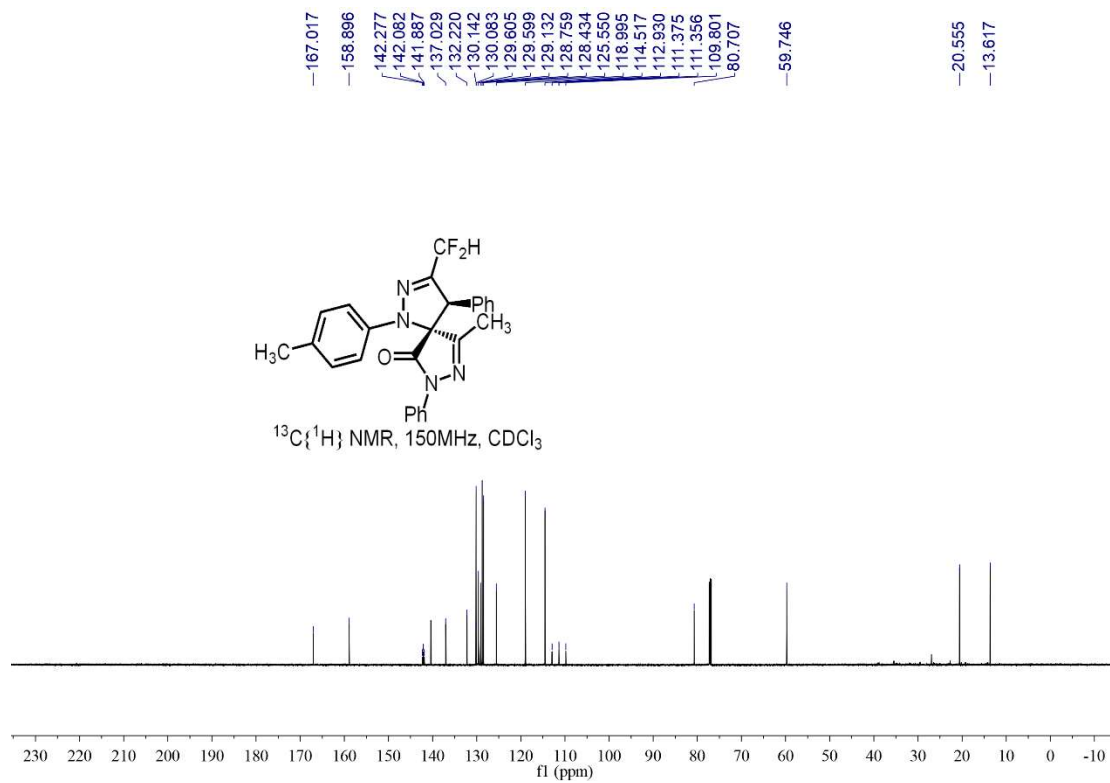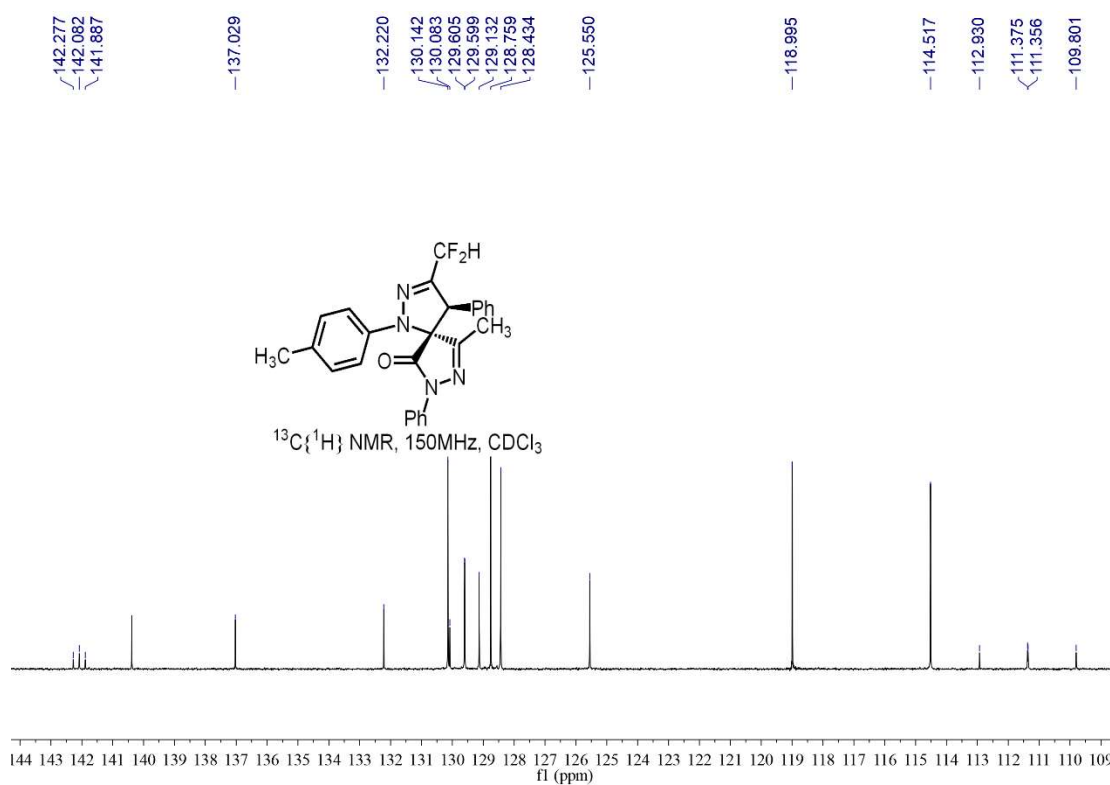

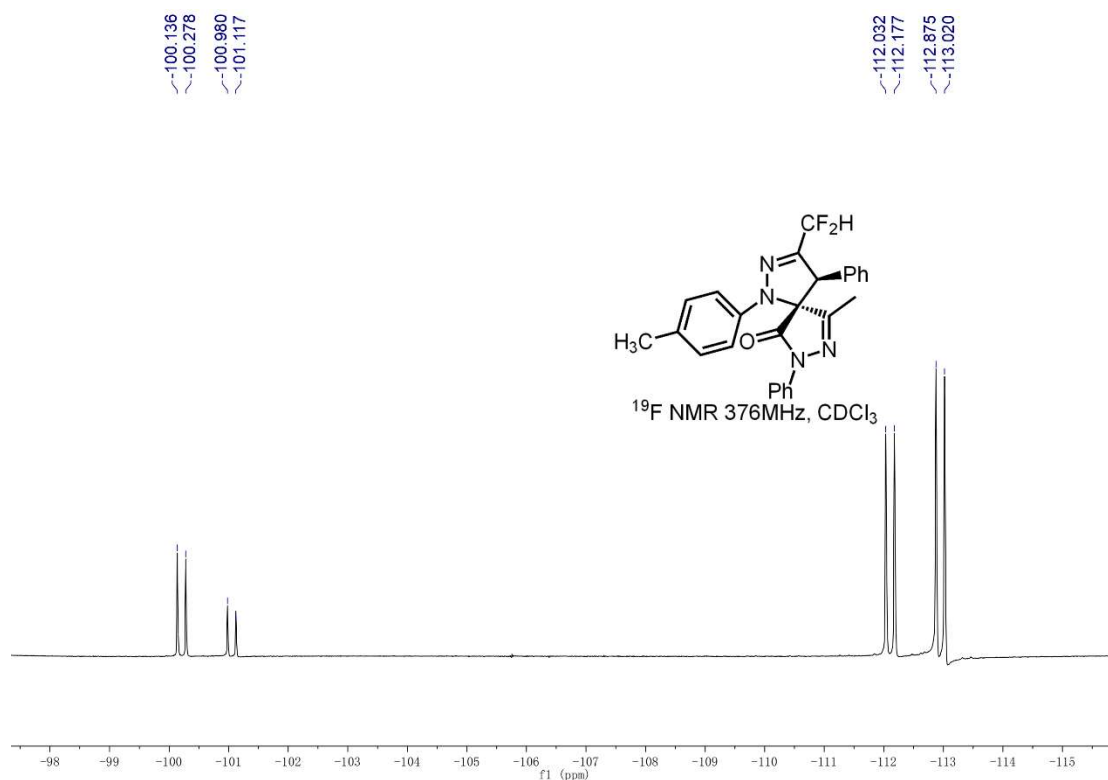

HRMS (ESI) copy of compound (*cis*)-**3c**:

### Mass Spectrum SmartFormula Report

#### Analysis Info

Analysis Name D:\Data\user\fengyang 20220616-13.d  
 Method tune\_low.m  
 Sample Name A-141  
 Comment

Acquisition Date 2022-6-16 10:52:46  
 Operator BDAL@DE  
 Instrument / Ser# micrOTOF-Q 20453

#### Acquisition Parameter

|             |          |                       |           |                  |           |
|-------------|----------|-----------------------|-----------|------------------|-----------|
| Source Type | ESI      | Ion Polarity          | Positive  | Set Nebulizer    | 0.4 Bar   |
| Focus       | Active   | Set Capillary         | 4500 V    | Set Dry Heater   | 180 j°C   |
| Scan Begin  | 100 m/z  | Set End Plate Offset  | -500 V    | Set Dry Gas      | 2.0 l/min |
| Scan End    | 1000 m/z | Set Collision Cell RF | 300.0 Vpp | Set Divert Valve | Waste     |

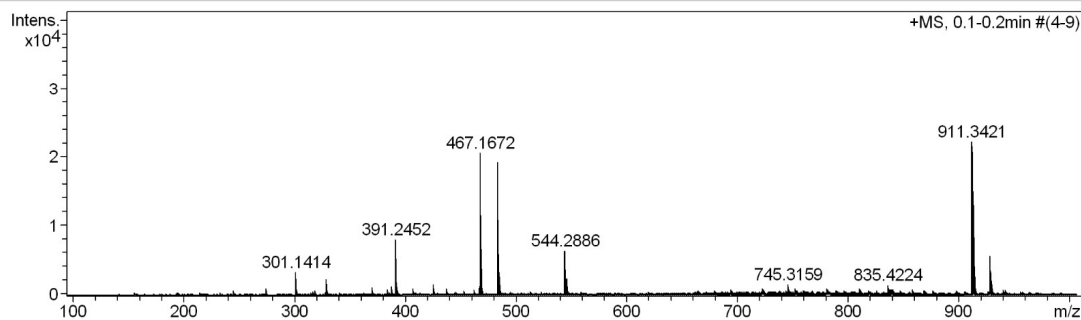

| Meas. #  | Formula                                                             | m/z      | err [ppm] | Me an err [ppm] | rdb  | N-R | e j % Conf | mSi gm a | Std l | St d l Me an z m | St d l rN z m | St d l m/ z f | Std Com b Dev |
|----------|---------------------------------------------------------------------|----------|-----------|-----------------|------|-----|------------|----------|-------|------------------|---------------|---------------|---------------|
| 467.1672 | 1 C <sub>26</sub> H <sub>22</sub> F <sub>2</sub> N <sub>4</sub> NaO | 467.1654 | -3.9      | -3.4            | 16.5 | ok  | even       | 14.3     | 21.6  | 2.1              | 9.5           | 0.2           | 842.7         |

NMR copies of compound (*trans*)-**3d**:

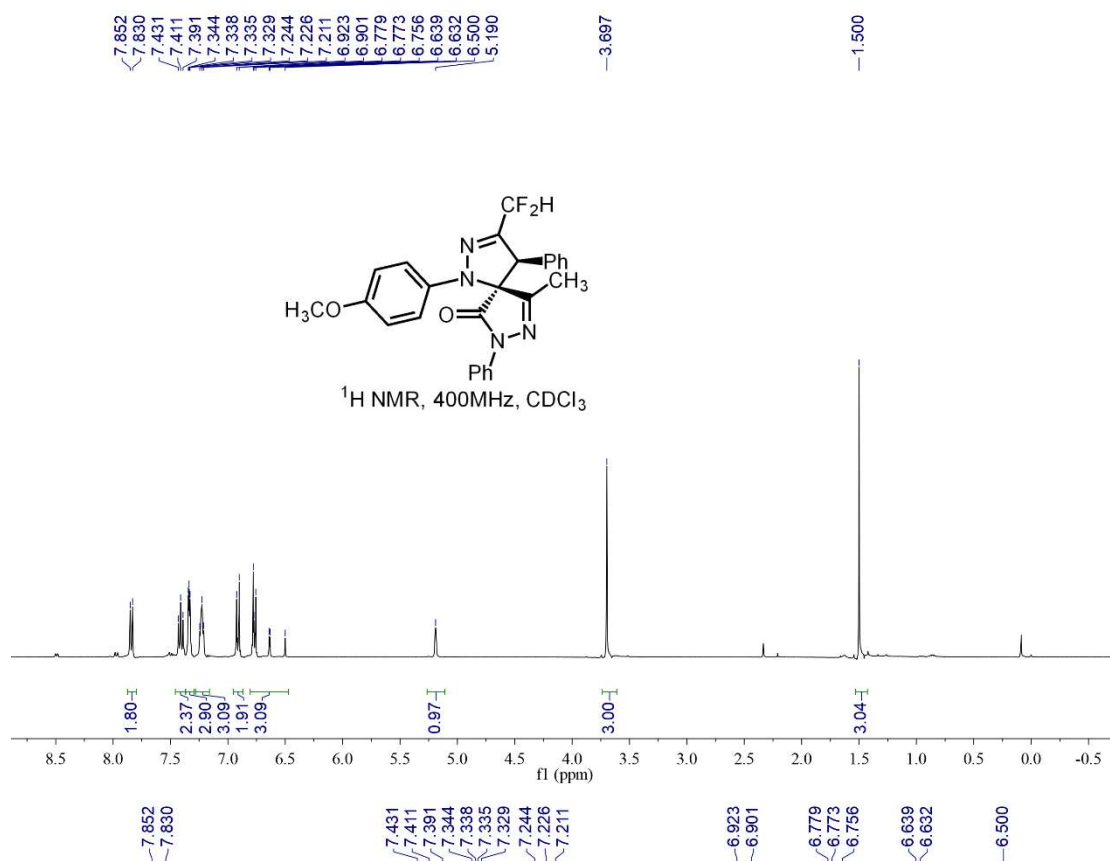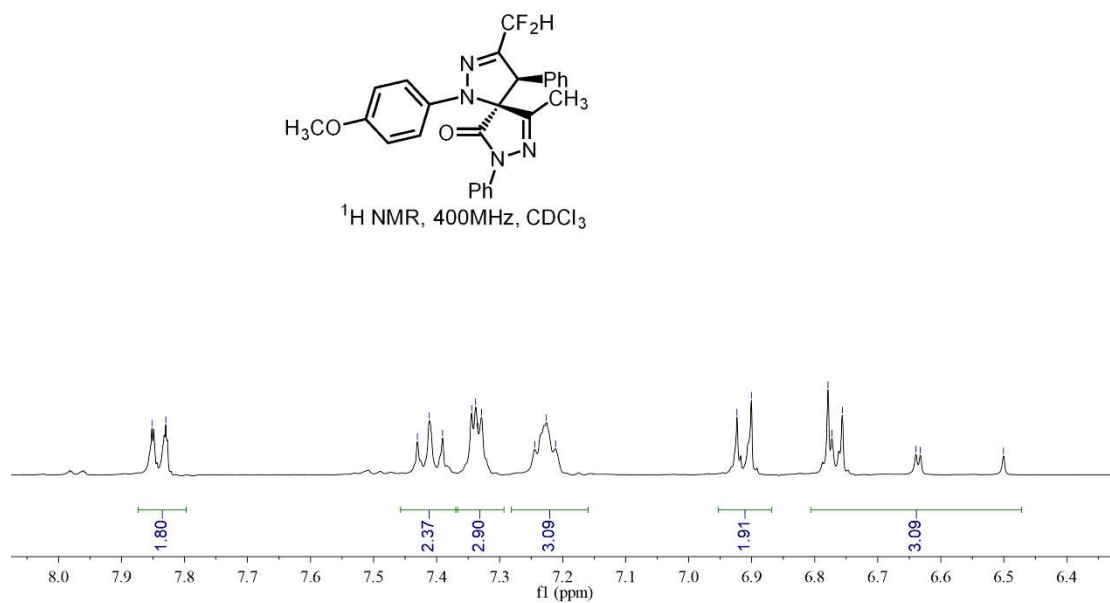

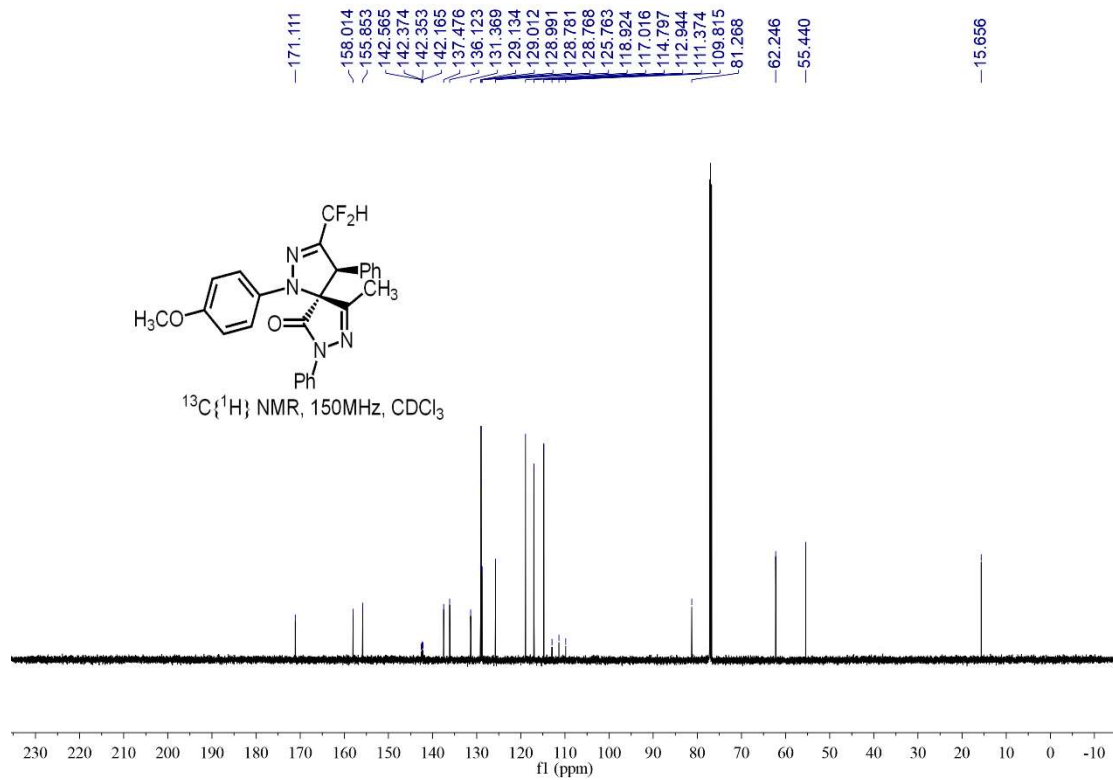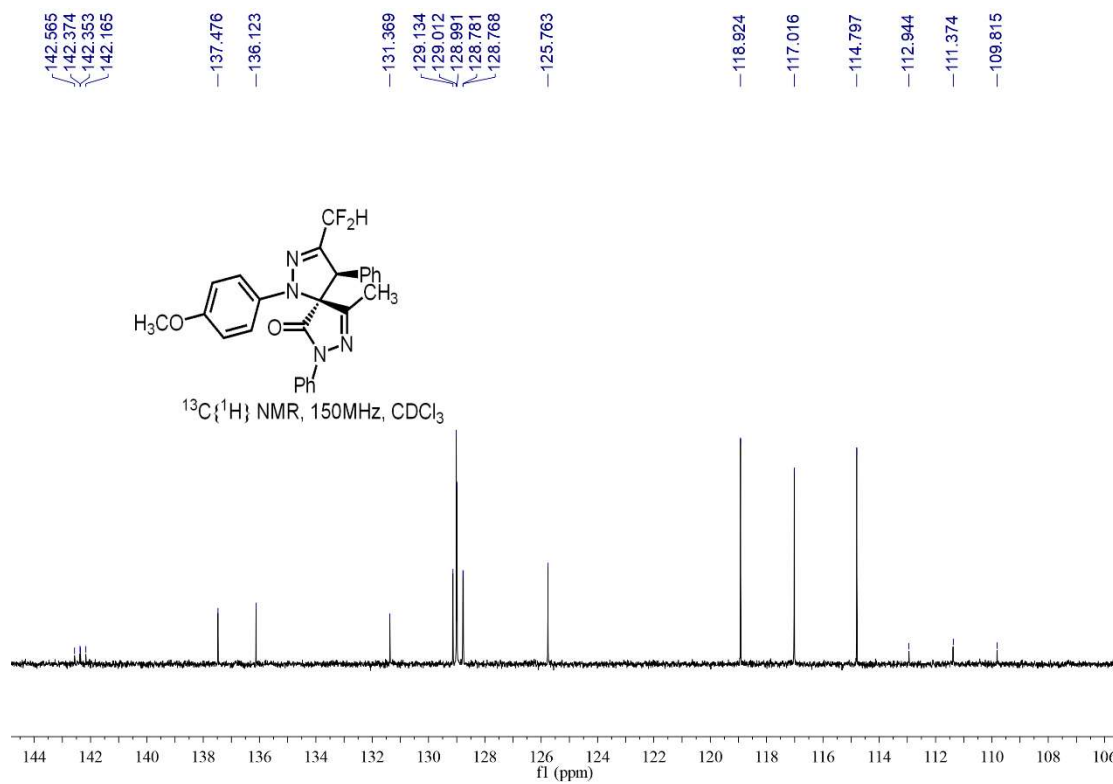

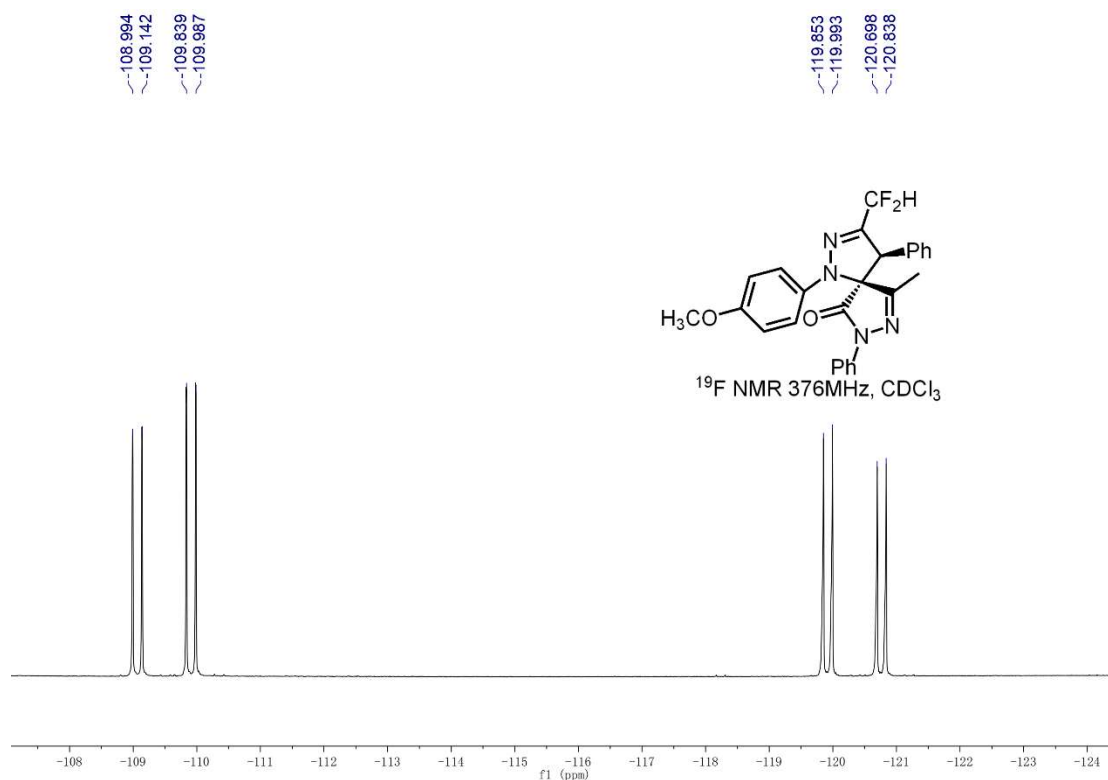

HRMS (ESI) copy of compound (*trans*)-**3d**:

### Mass Spectrum SmartFormula Report

#### Analysis Info

Analysis Name D:\Data\user\NWNW-fengyang 20220707-1.d  
 Method tune\_low.m  
 Sample Name A22  
 Comment

Acquisition Date 2022-7-7 11:16:10

Operator BDAL@DE  
 Instrument / Ser# micrOTOF-Q 20453

#### Acquisition Parameter

|             |          |                       |           |                  |           |
|-------------|----------|-----------------------|-----------|------------------|-----------|
| Source Type | ESI      | Ion Polarity          | Positive  | Set Nebulizer    | 0.4 Bar   |
| Focus       | Active   | Set Capillary         | 4500 V    | Set Dry Heater   | 180 j°C   |
| Scan Begin  | 100 m/z  | Set End Plate Offset  | -500 V    | Set Dry Gas      | 4.0 l/min |
| Scan End    | 2000 m/z | Set Collision Cell RF | 600.0 Vpp | Set Divert Valve | Waste     |

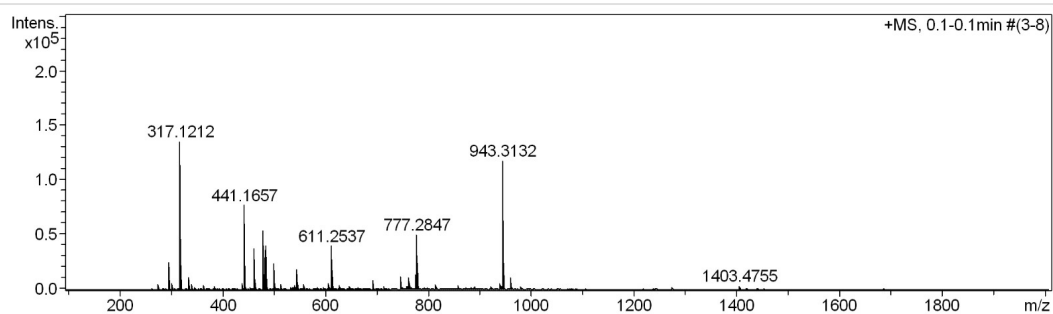

| Meas. #  | Formula                                                                        | m/z      | err [ppm] | Me an err [ppm] | rdB  | N-R | ej# Conf | mSi gma | Std l | St d Me an m/z | Std l Var m | Std l Dif f | Std Com b Dev |
|----------|--------------------------------------------------------------------------------|----------|-----------|-----------------|------|-----|----------|---------|-------|----------------|-------------|-------------|---------------|
| 461.1788 | 1 C <sub>26</sub> H <sub>23</sub> F <sub>2</sub> N <sub>4</sub> O <sub>2</sub> | 461.1784 | -0.9      | 0.2             | 16.5 | ok  | even     | 42.9    | 66.5  | 1.2            | 28.7        | 1.8         | 842.7         |

NMR copies of compound (*cis*)-**3d**:

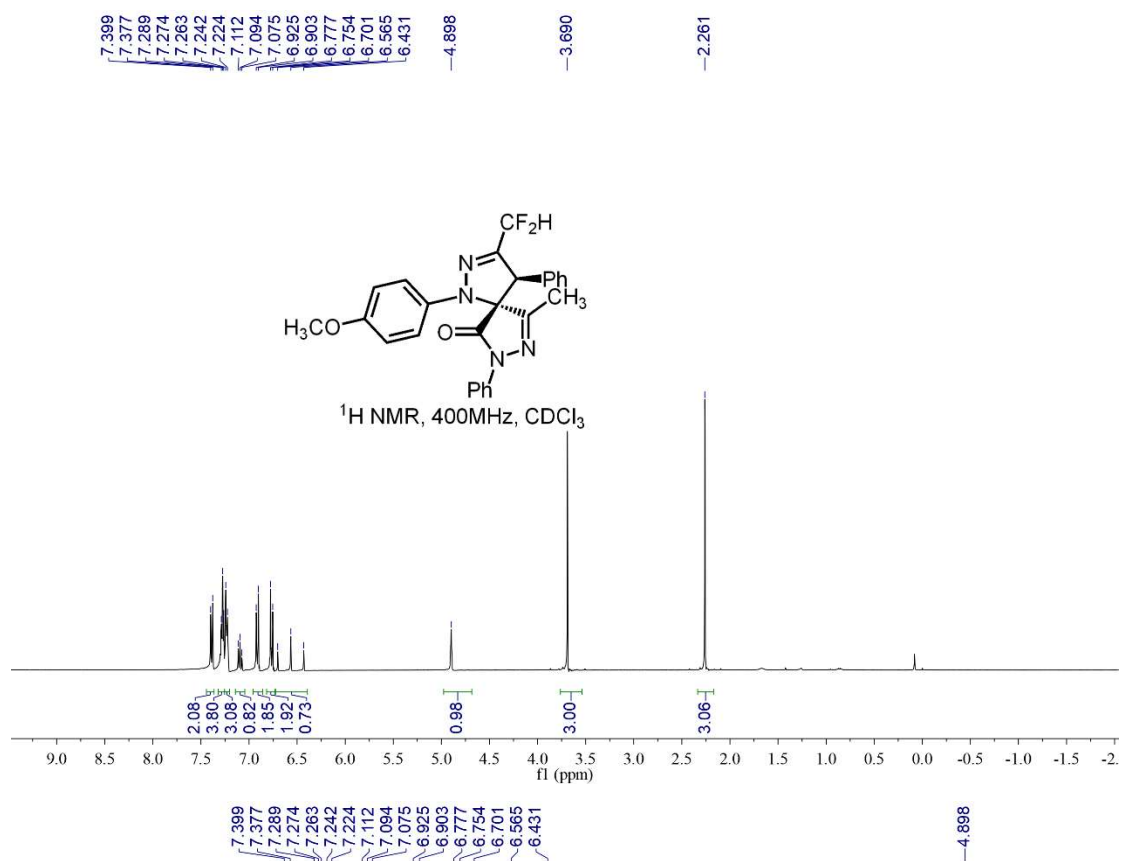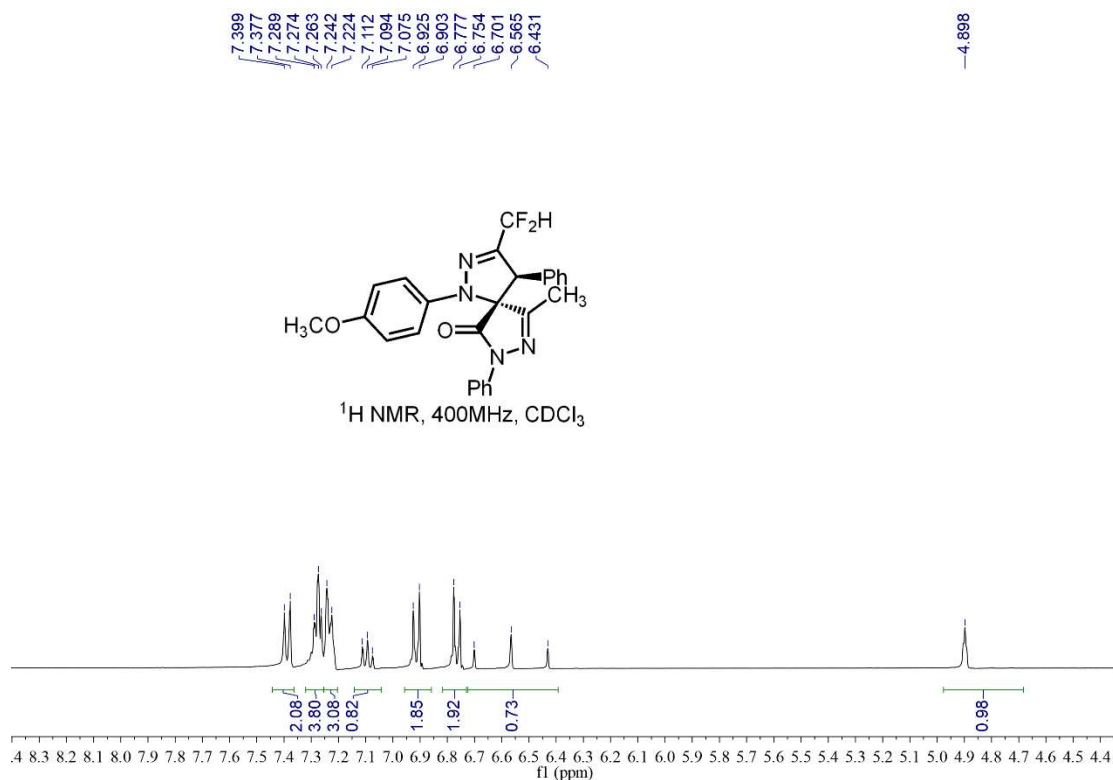



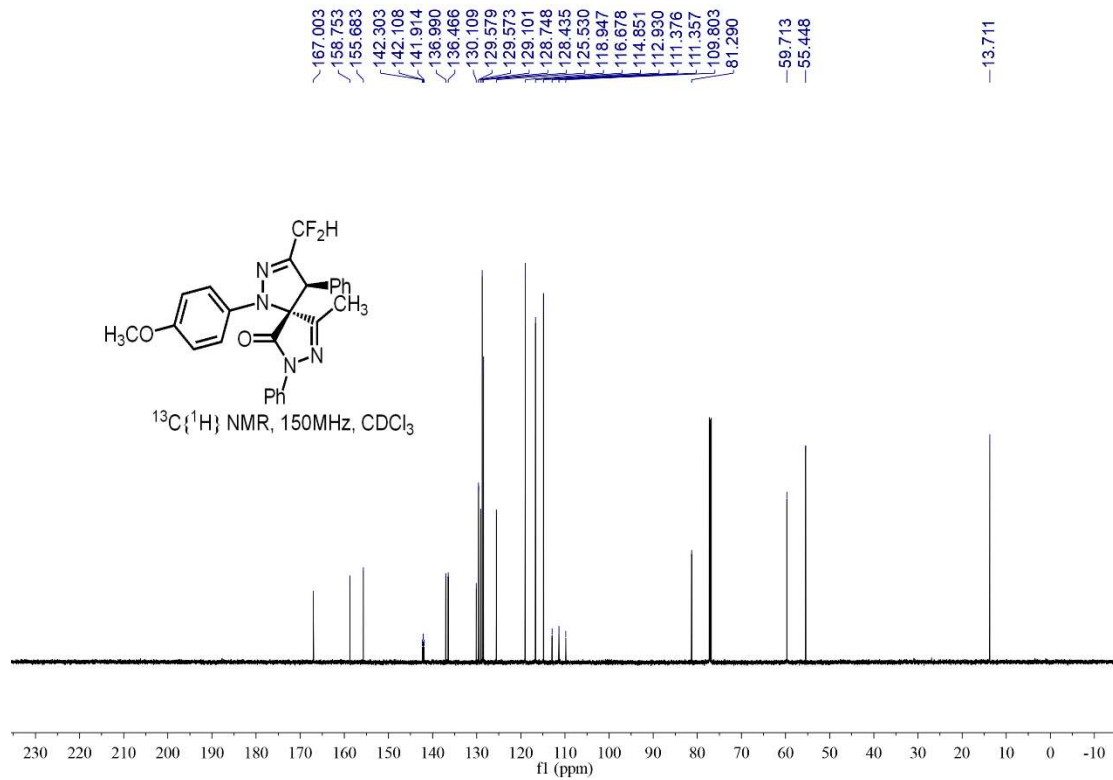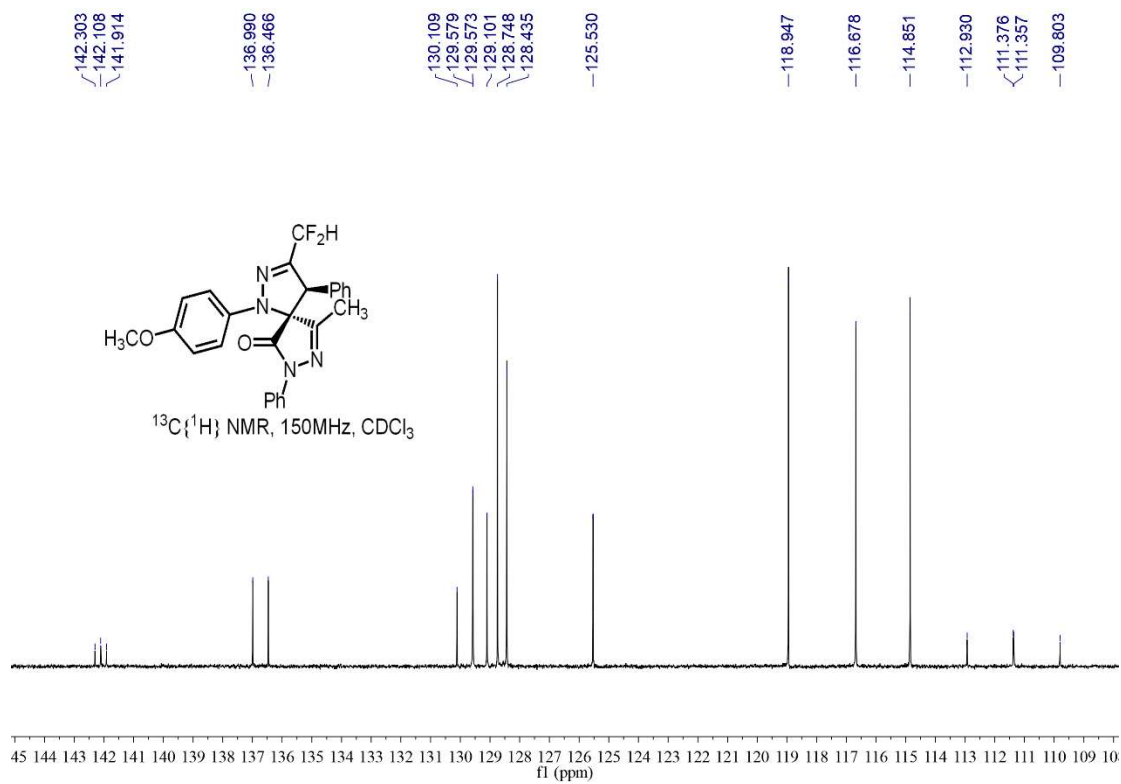

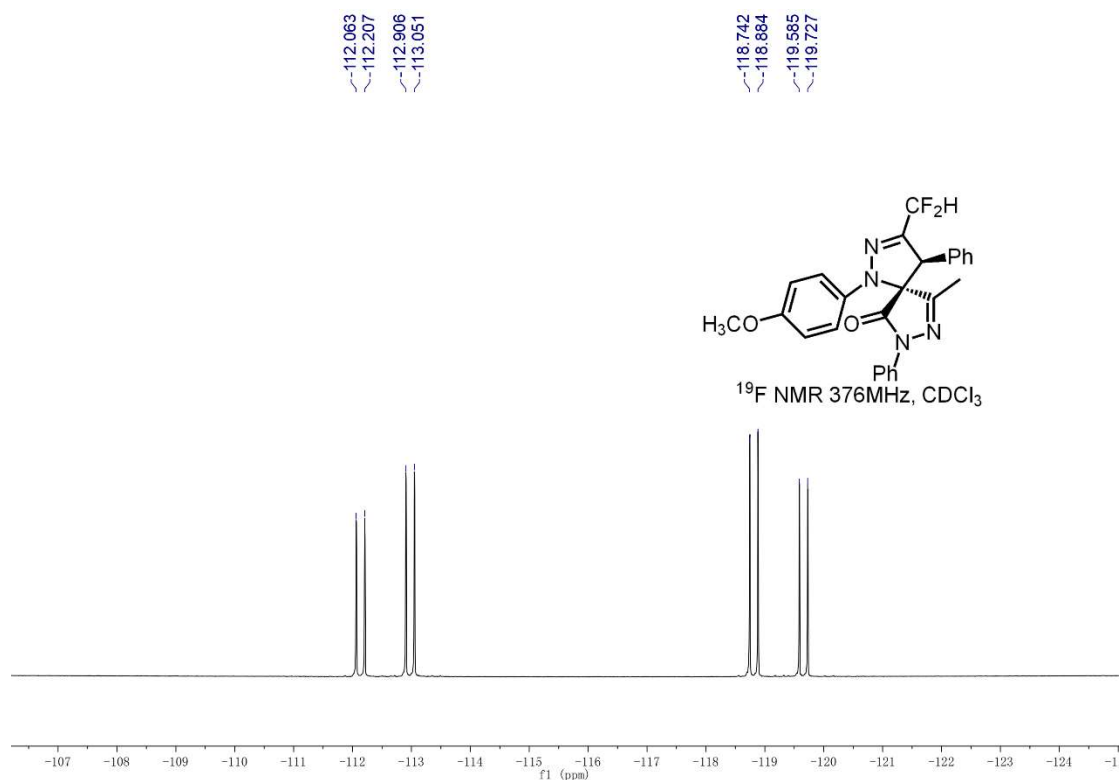

HRMS (ESI) copy of compound (*cis*)-**3d**:

### Mass Spectrum SmartFormula Report

#### Analysis Info

Analysis Name D:\Data\user\NWNNU-fengyang 20220707---2.d  
 Method tune\_low.m  
 Sample Name A221  
 Comment

Acquisition Date 2022-7-7 11:25:15  
 Operator BDAL@DE  
 Instrument / Ser# micrOTOF-Q 20453

#### Acquisition Parameter

|             |          |                       |           |                  |           |
|-------------|----------|-----------------------|-----------|------------------|-----------|
| Source Type | ESI      | Ion Polarity          | Positive  | Set Nebulizer    | 0.4 Bar   |
| Focus       | Active   | Set Capillary         | 4500 V    | Set Dry Heater   | 180 j°C   |
| Scan Begin  | 100 m/z  | Set End Plate Offset  | -500 V    | Set Dry Gas      | 4.0 l/min |
| Scan End    | 1000 m/z | Set Collision Cell RF | 500.0 Vpp | Set Divert Valve | Waste     |

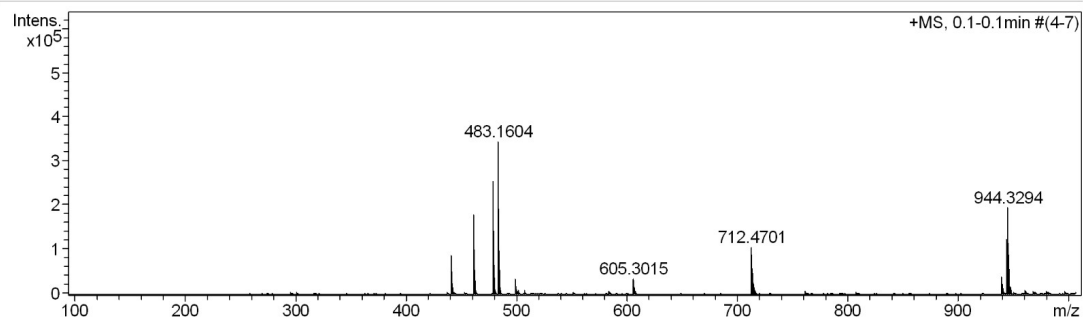

| Meas. #  | Formula                                                                          | m/z      | err [ppm] | Mean err [ppm] | rdb  | N-R | e <sub>i</sub> ≠ Conf | m Sigma | St d l | St d l | St d l | St d l | Std Com b Dev |
|----------|----------------------------------------------------------------------------------|----------|-----------|----------------|------|-----|-----------------------|---------|--------|--------|--------|--------|---------------|
| 483.1604 | 1 C <sub>26</sub> H <sub>22</sub> F <sub>2</sub> N <sub>4</sub> NaO <sub>2</sub> | 483.1603 | -0.3      | -0.8           | 16.5 | ok  | even                  | 4.5     | 6.5    | 0.7    | 2.8    | 0.7    | 842.7         |

NMR copies of compound (*trans*)-**3e**:

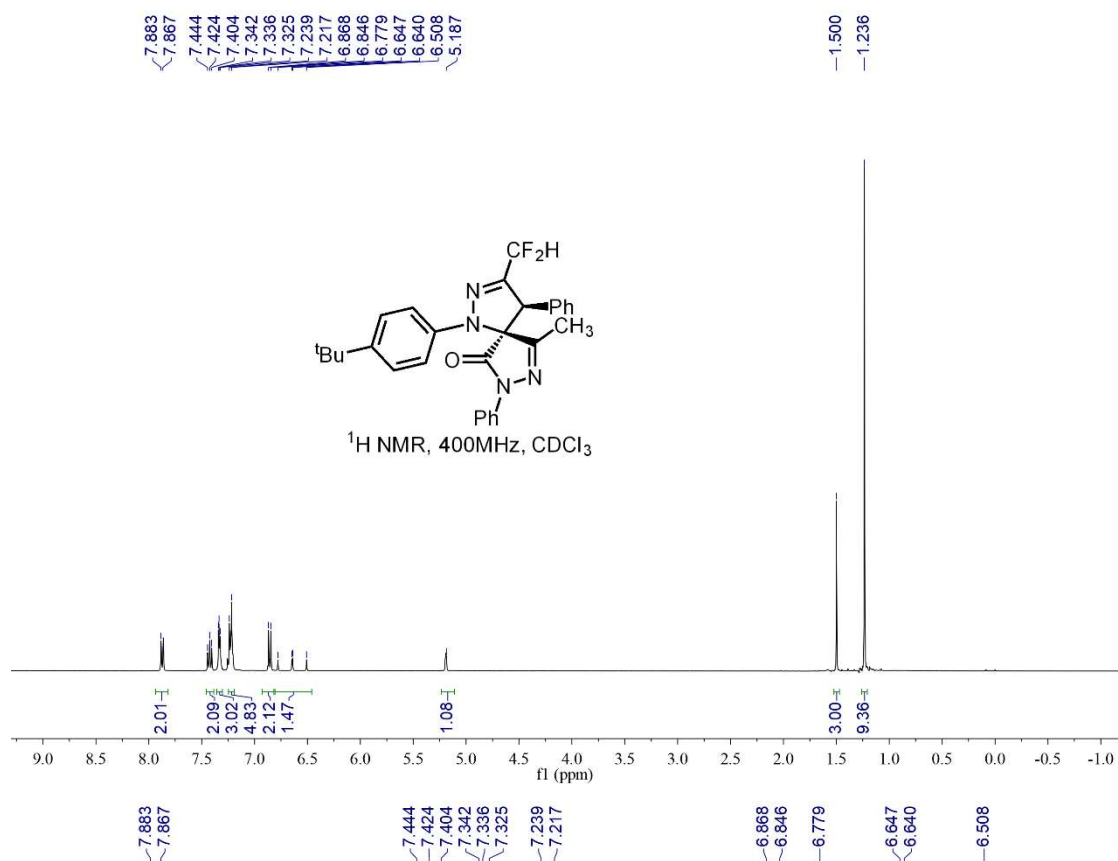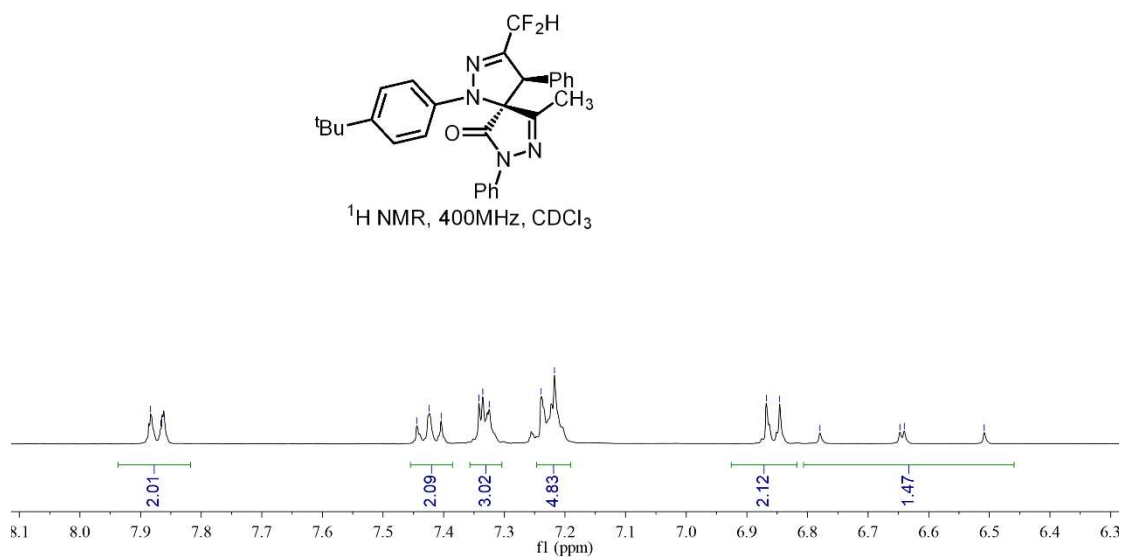

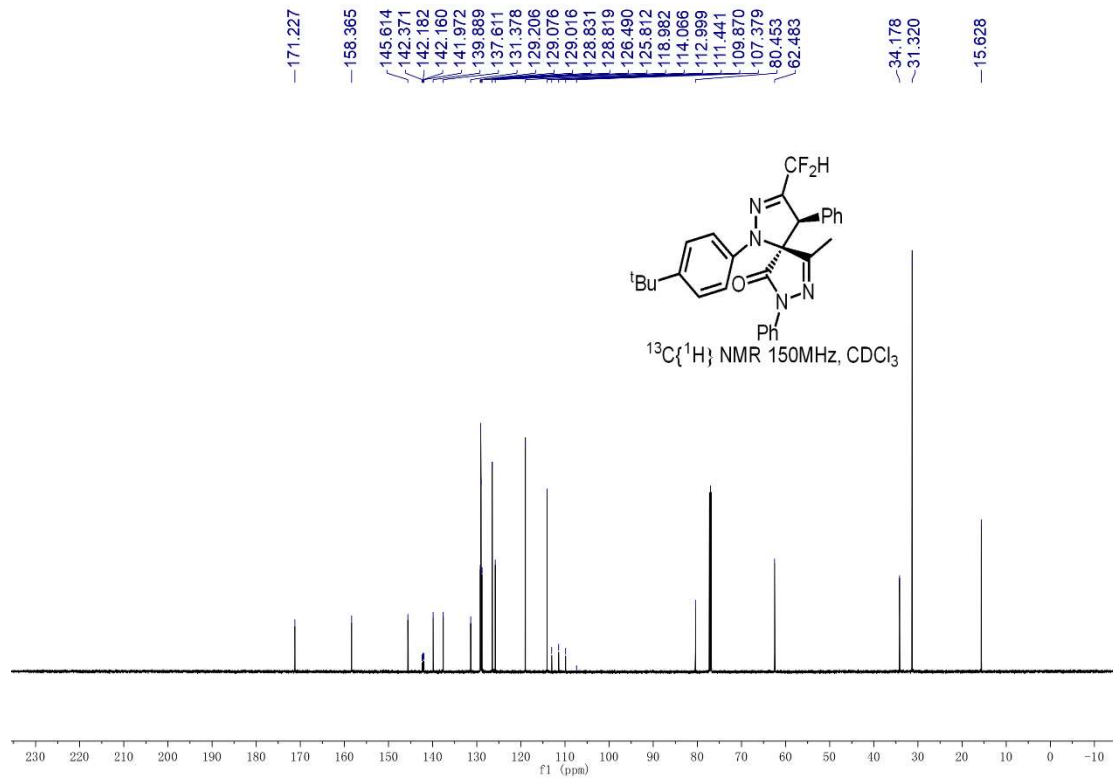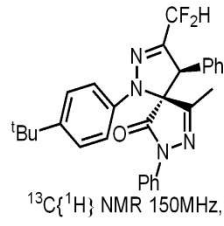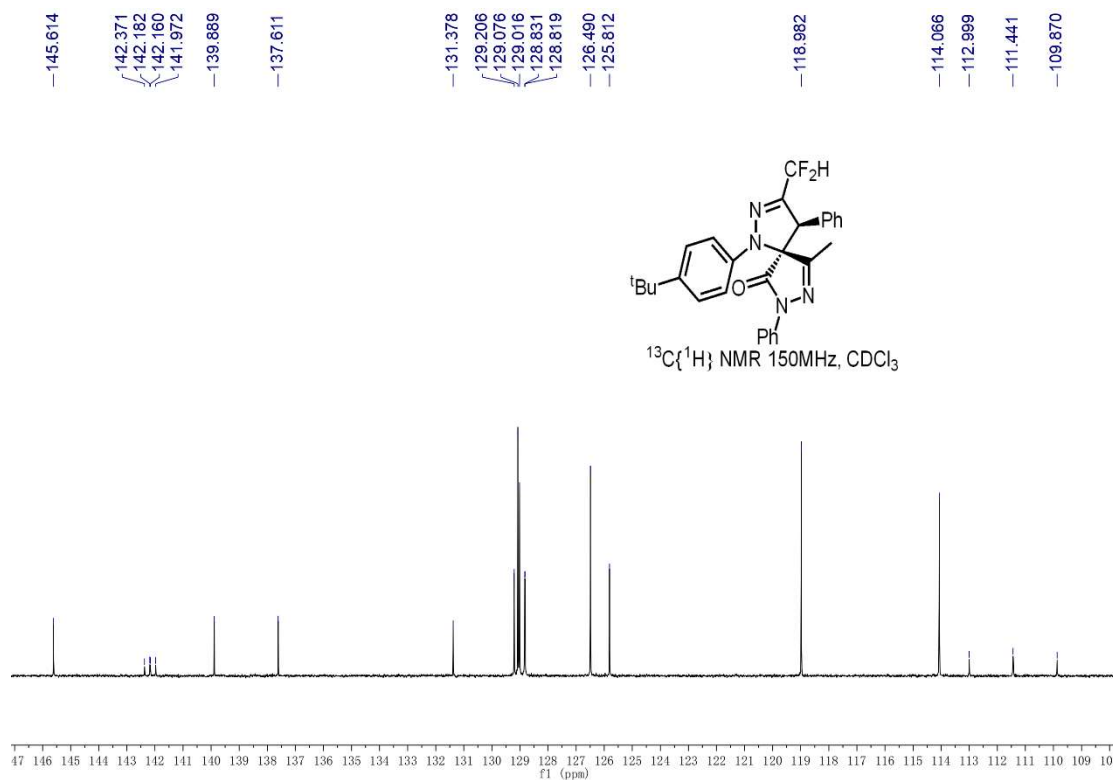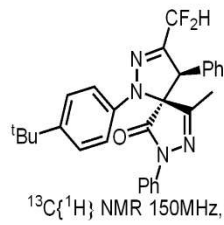

-108.930  
-109.077  
-109.775  
-109.923

-119.828  
-119.968  
-120.673  
-120.813

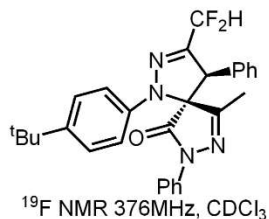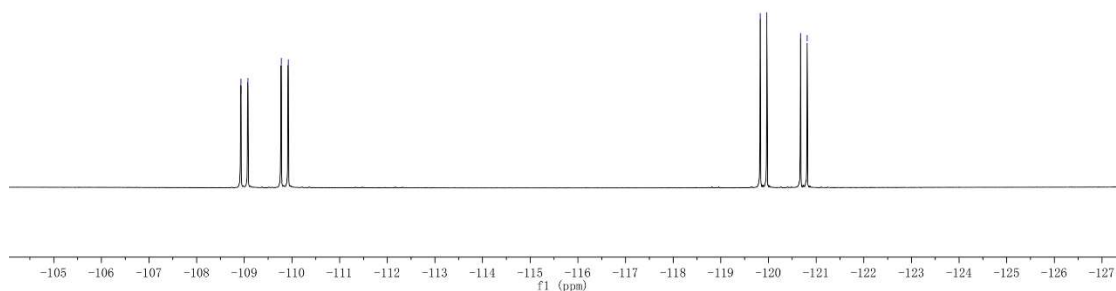

HRMS (ESI) copy of compound (*trans*)-3e:

### Mass Spectrum SmartFormula Report

#### Analysis Info

Analysis Name D:\Data\user\NWNWU-fengyang 20220707-5.d  
Method tune\_low.m  
Sample Name A-25  
Comment

Acquisition Date 2022-7-7 11:29:58

Operator BDAL@DE  
Instrument / Ser# micrOTOF-Q 20453

#### Acquisition Parameter

|             |          |                       |           |                  |           |
|-------------|----------|-----------------------|-----------|------------------|-----------|
| Source Type | ESI      | Ion Polarity          | Positive  | Set Nebulizer    | 0.4 Bar   |
| Focus       | Active   | Set Capillary         | 4500 V    | Set Dry Heater   | 180 j°C   |
| Scan Begin  | 100 m/z  | Set End Plate Offset  | -500 V    | Set Dry Gas      | 4.0 l/min |
| Scan End    | 1000 m/z | Set Collision Cell RF | 500.0 Vpp | Set Divert Valve | Waste     |

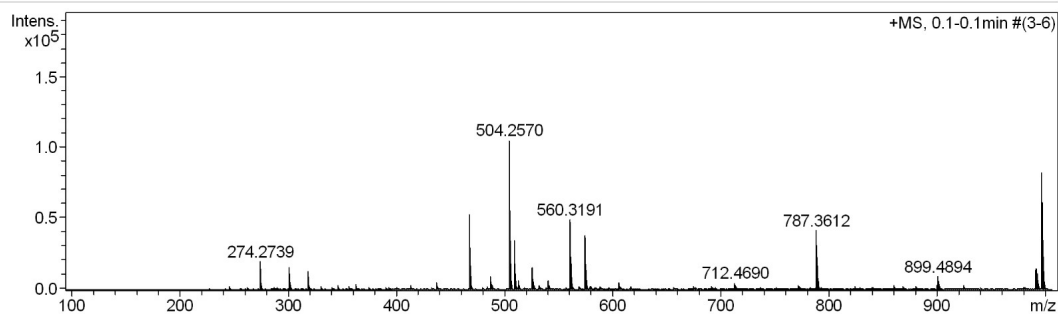

| Meas. #  | Formula                                                             | m/z      | err [ppm] | Me an err [ppm] | rdb  | N-R | e <sub>i</sub> ≠ | mS Conf | Std | Std | Std | Std | Std   |
|----------|---------------------------------------------------------------------|----------|-----------|-----------------|------|-----|------------------|---------|-----|-----|-----|-----|-------|
| m/z      |                                                                     |          |           |                 |      |     |                  |         | l   | l   | l   | l   | l     |
| 509.2129 | 1 C <sub>29</sub> H <sub>28</sub> F <sub>2</sub> N <sub>4</sub> NaO | 509.2123 | -1.0      | -1.0            | 16.5 | ok  | even             | 6.3     | 9.1 | 0.5 | 4.0 | 0.5 | 842.7 |

NMR copies of compound (*cis*)-**3e**:

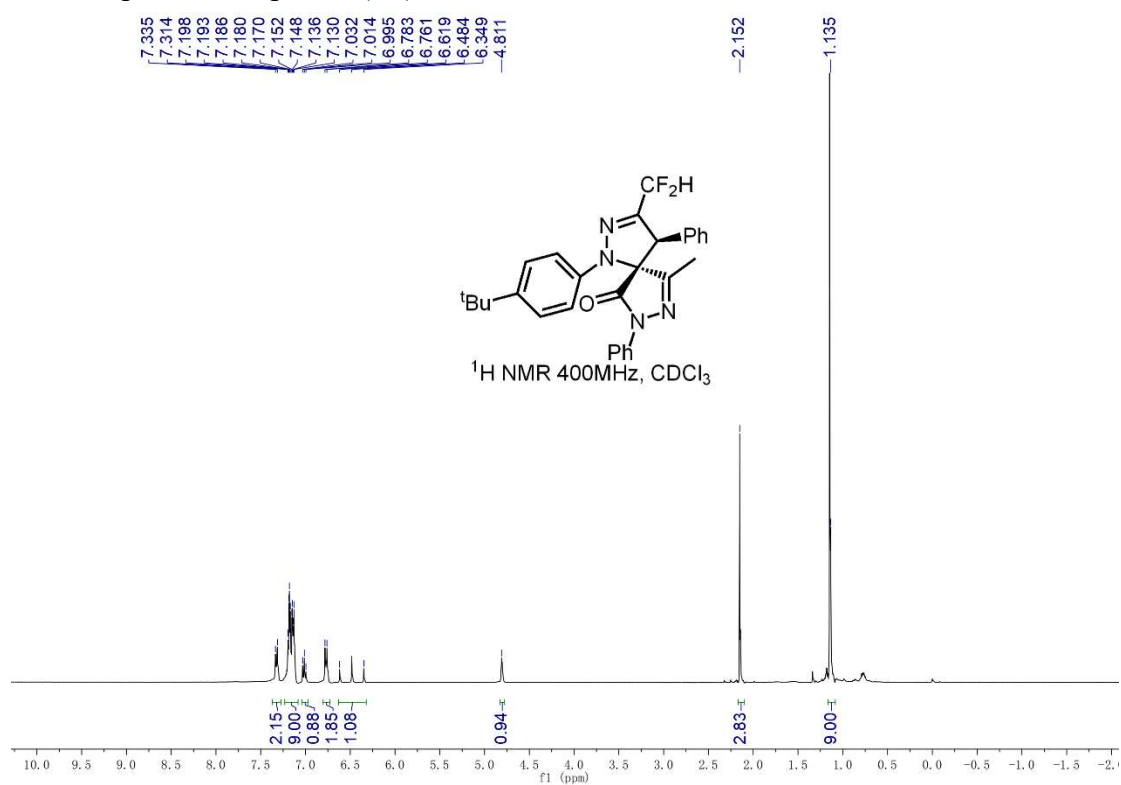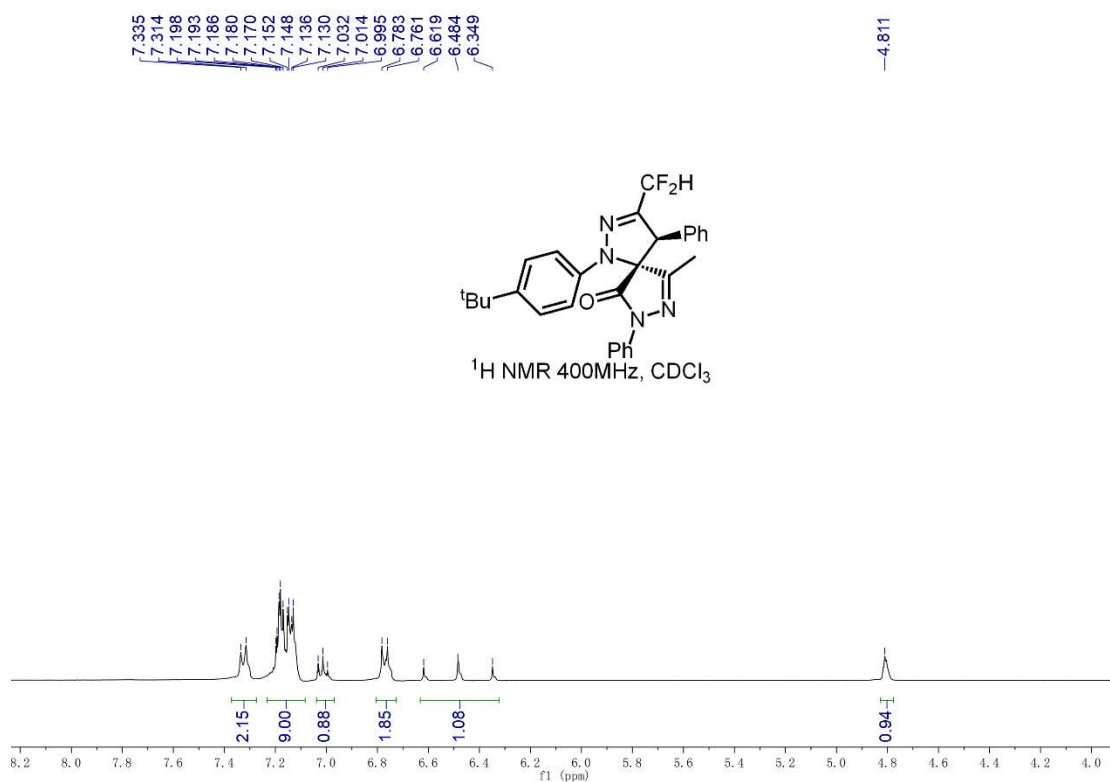

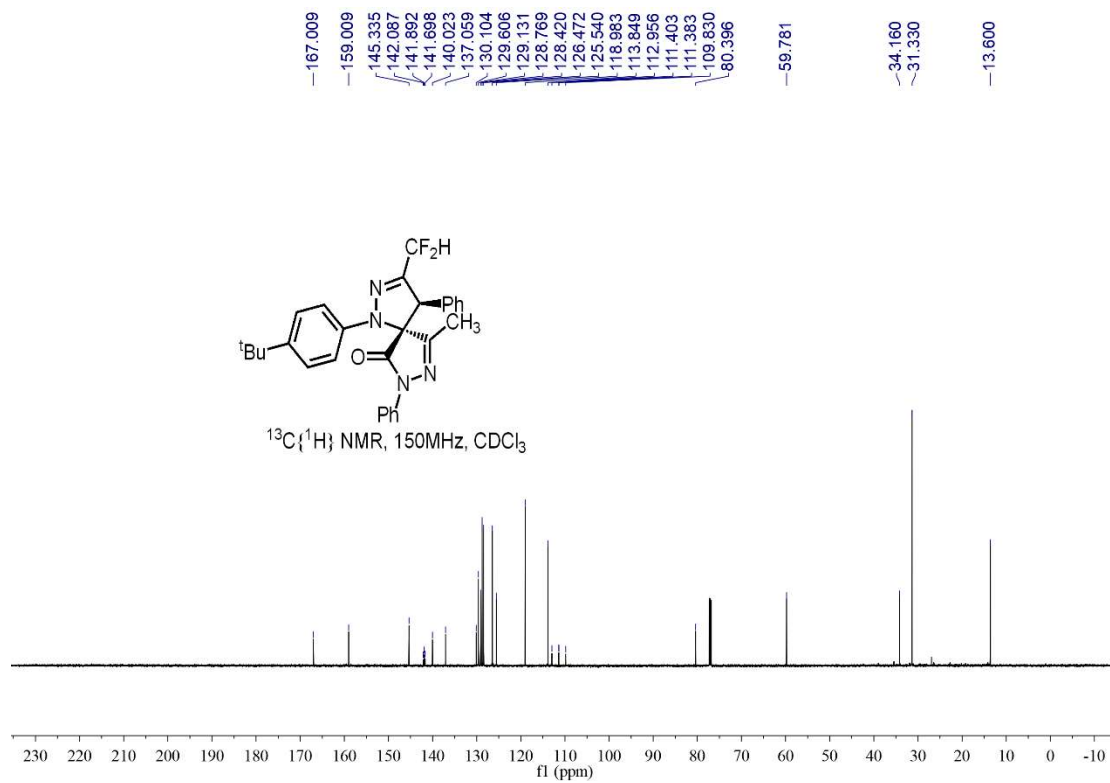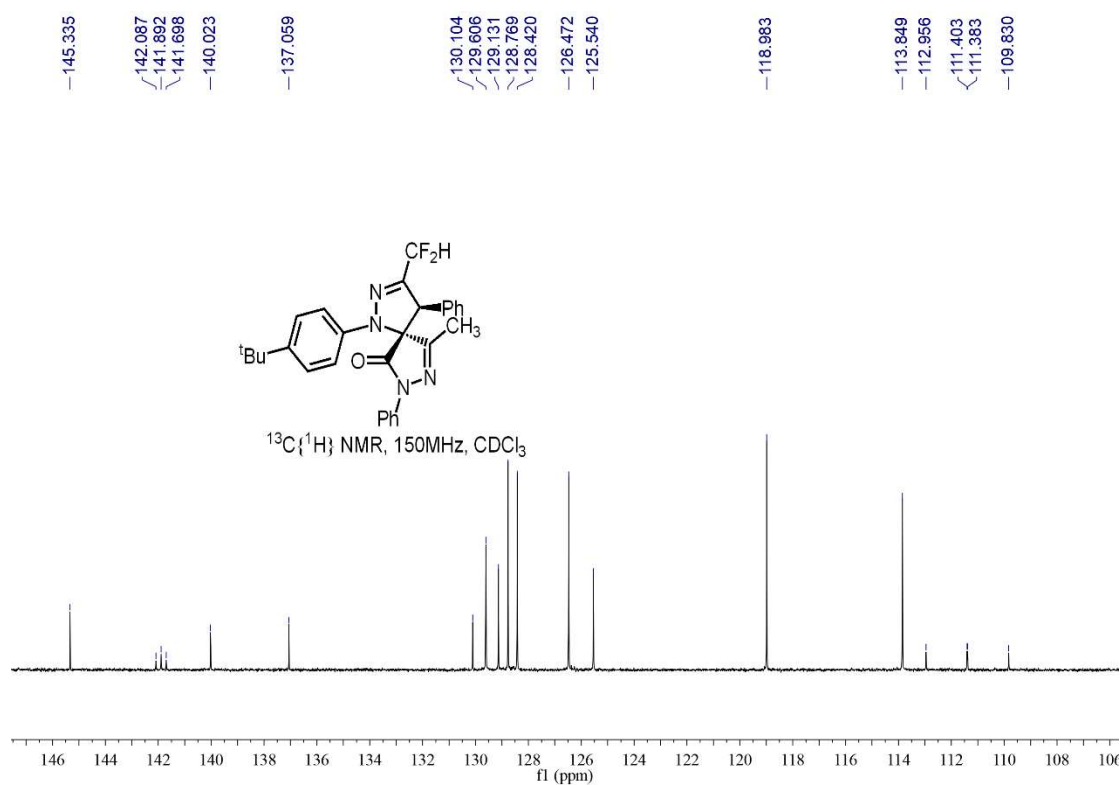

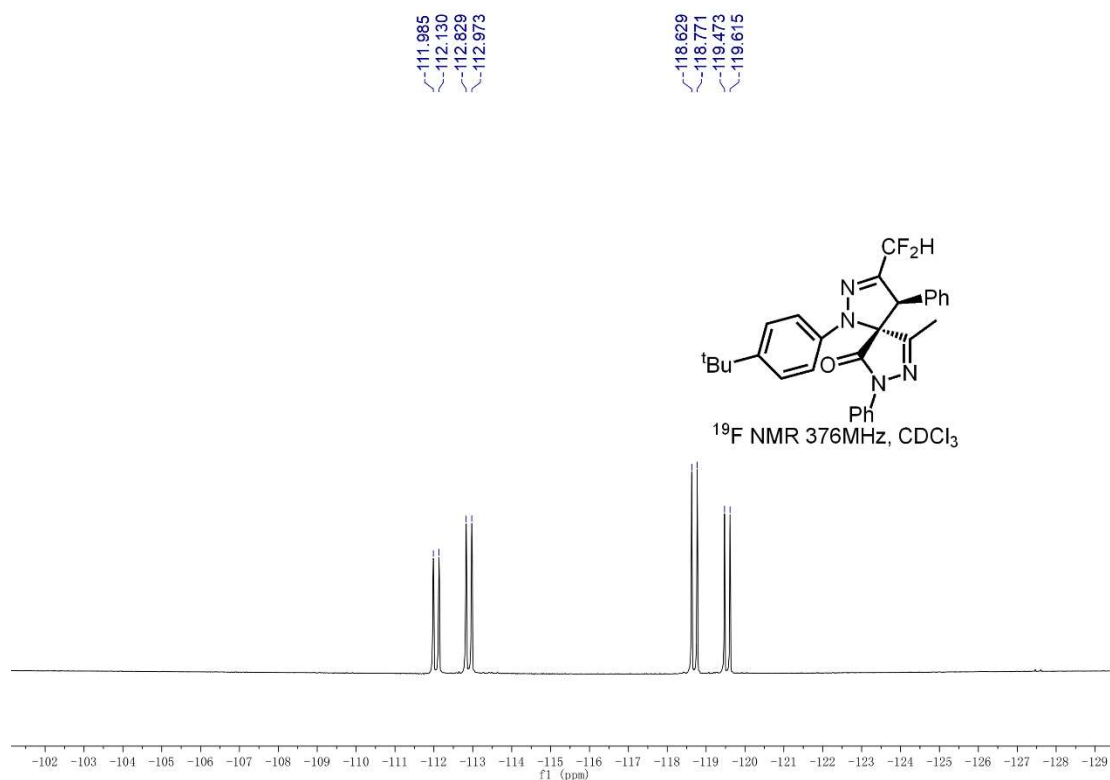

HRMS (ESI) copy of compound (*cis*)-**3e**:

### Mass Spectrum SmartFormula Report

#### Analysis Info

Analysis Name D:\Data\user\NWNNU-fengyang 20220707-6.d  
 Method tune\_low.m  
 Sample Name A-251  
 Comment

Acquisition Date 2022-7-7 11:31:21

Operator BDAL@DE  
 Instrument / Ser# micrOTOF-Q 20453

#### Acquisition Parameter

|             |          |                       |           |                  |           |
|-------------|----------|-----------------------|-----------|------------------|-----------|
| Source Type | ESI      | Ion Polarity          | Positive  | Set Nebulizer    | 0.4 Bar   |
| Focus       | Active   | Set Capillary         | 4500 V    | Set Dry Heater   | 180 j°C   |
| Scan Begin  | 100 m/z  | Set End Plate Offset  | -500 V    | Set Dry Gas      | 4.0 l/min |
| Scan End    | 1000 m/z | Set Collision Cell RF | 500.0 Vpp | Set Divert Valve | Waste     |

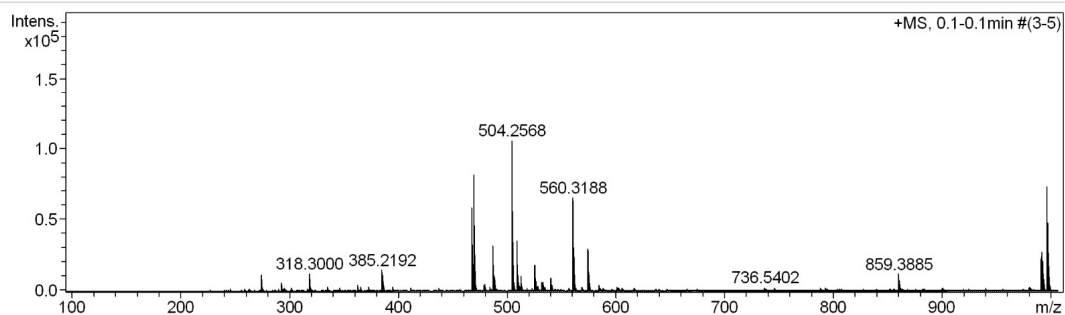

| Meas. #  | Formula                                                             | m/z      | err [ppm] | Me an err [ppm] | rdb  | N-R | e j% Con f | mSi gm a | Std l | St d Me m/z | Std l Var Nor m | Std m/z Diff | Std Com b Dev |
|----------|---------------------------------------------------------------------|----------|-----------|-----------------|------|-----|------------|----------|-------|-------------|-----------------|--------------|---------------|
| 509.2131 | 1 C <sub>29</sub> H <sub>28</sub> F <sub>2</sub> N <sub>4</sub> NaO | 509.2123 | -1.4      | -5.9            | 16.5 | ok  | even       | 20.0     | 31.6  | 9.1         | 15.6            | 23.7         | 842.7         |



NMR copies of compound (*trans*)-**3f**:

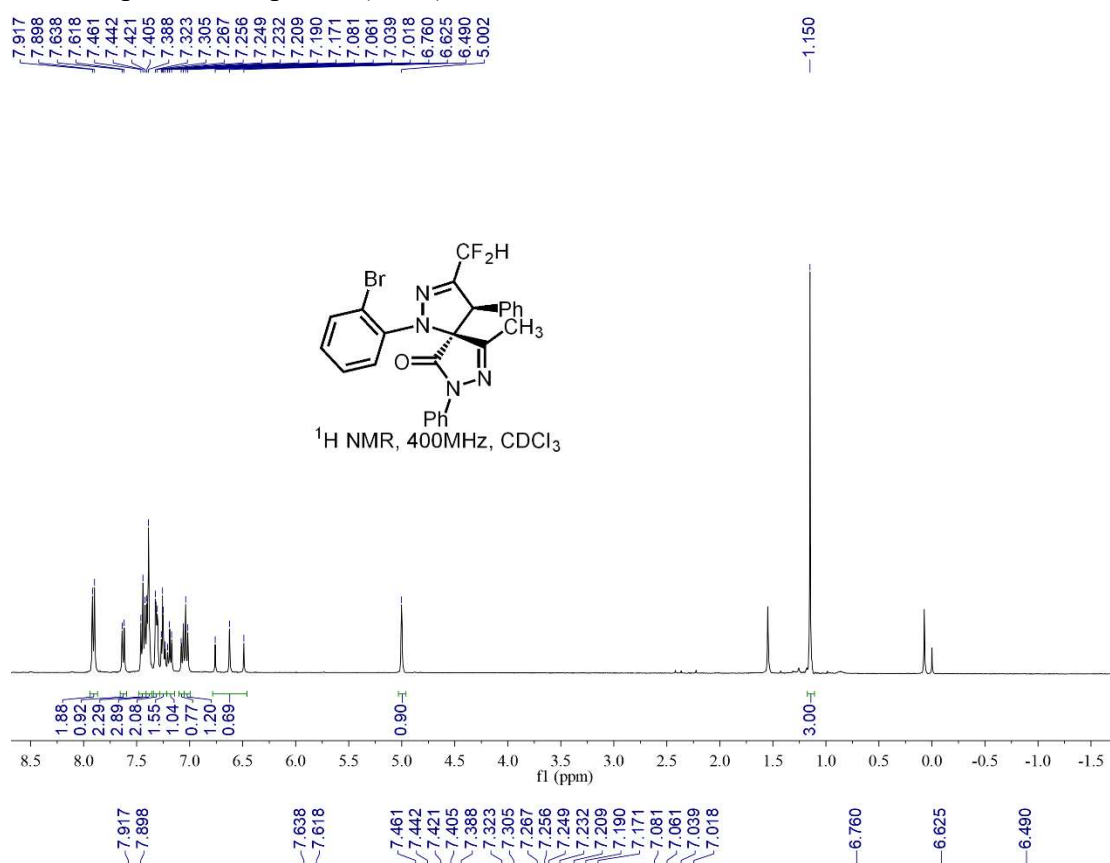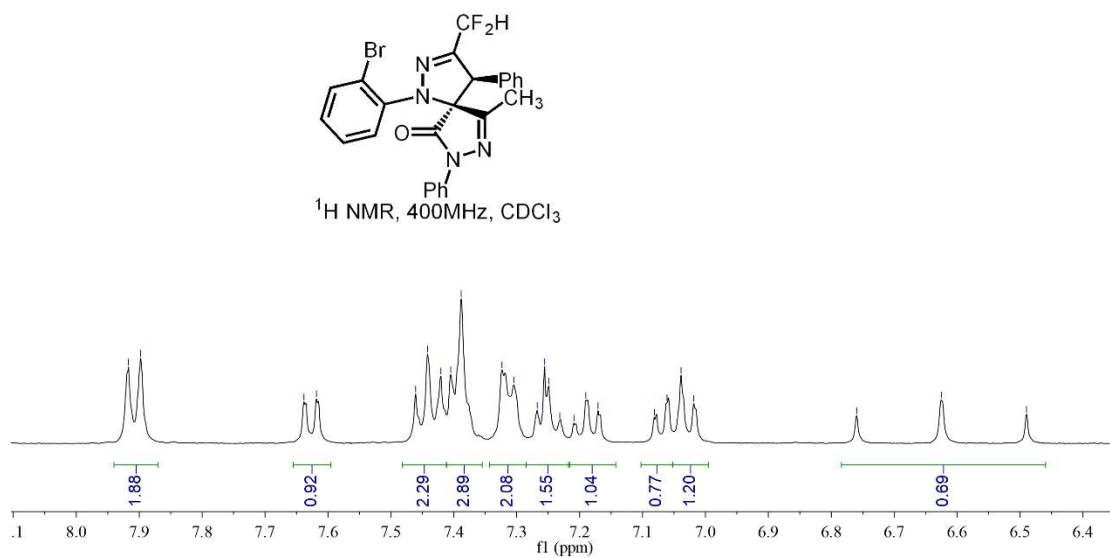

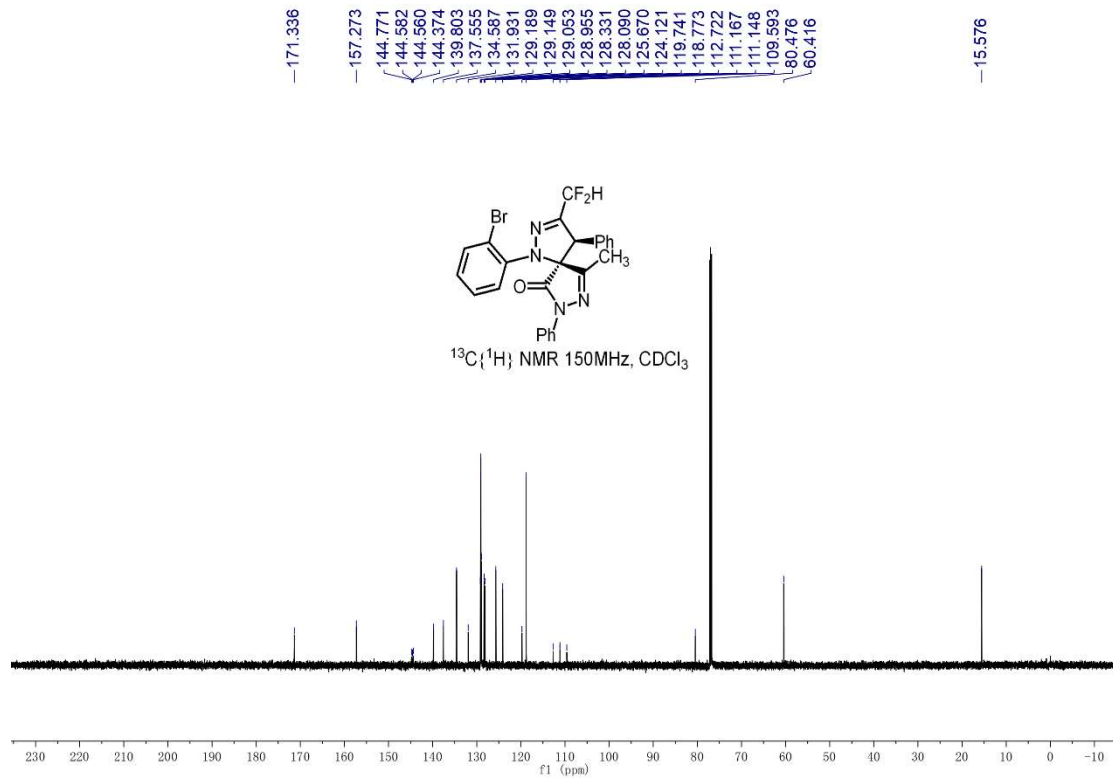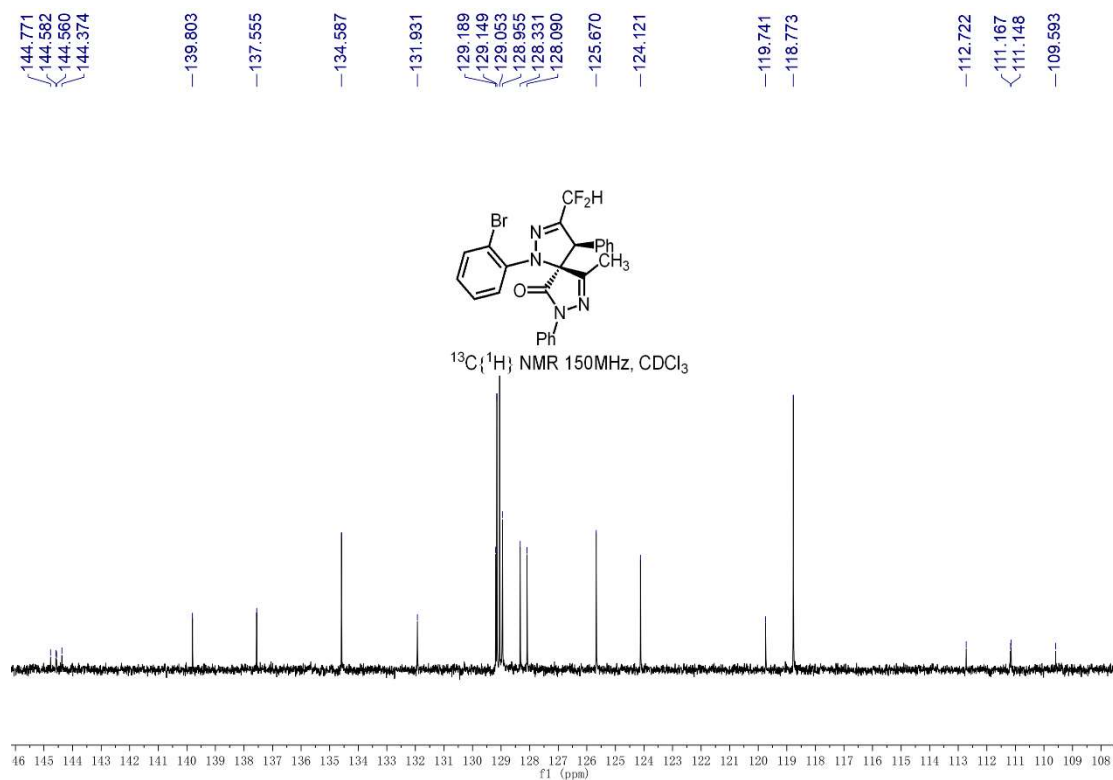

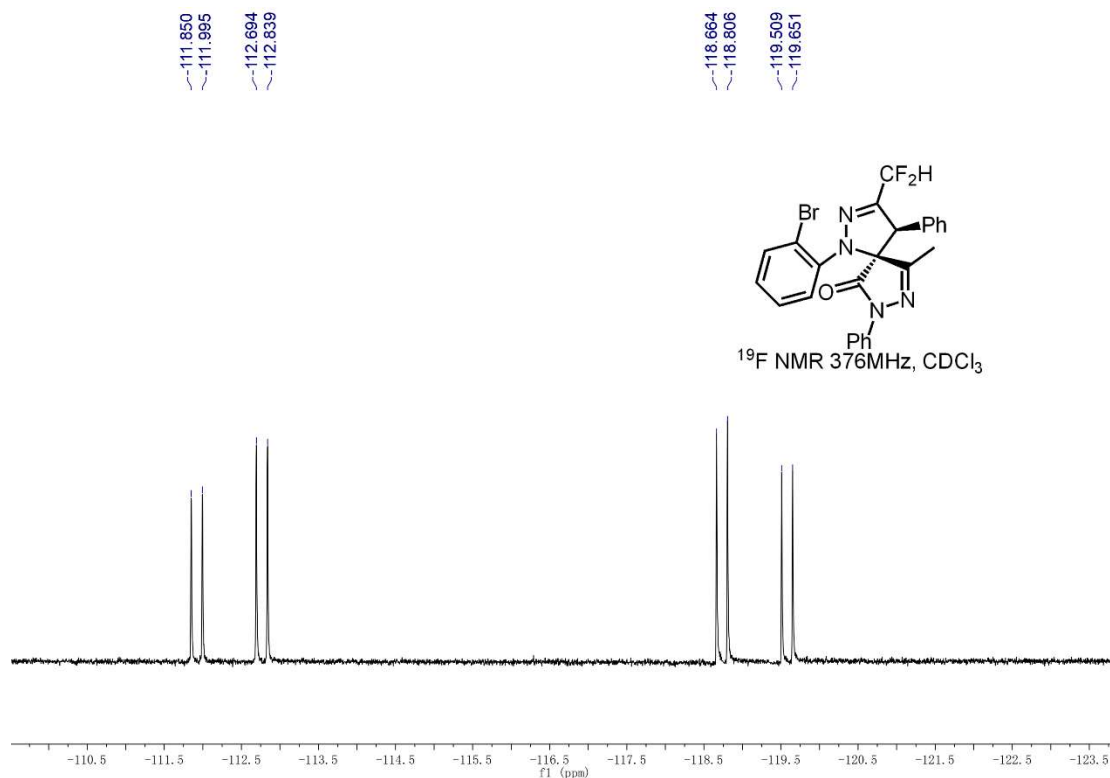

HRMS (ESI) copy of compound (*trans*)-3f:

### Mass Spectrum SmartFormula Report

**Analysis Info**

Analysis Name D:\Data\user\NWNNU-fengyang 20230321--1.d  
 Method tune\_low.m  
 Sample Name A-18  
 Comment

Acquisition Date 2023-3-21 15:30:09

Operator BDAL@DE  
 Instrument / Ser# micrOTOF-Q 20453

**Acquisition Parameter**

|             |          |                       |           |                  |           |
|-------------|----------|-----------------------|-----------|------------------|-----------|
| Source Type | ESI      | Ion Polarity          | Positive  | Set Nebulizer    | 0.4 Bar   |
| Focus       | Active   | Set Capillary         | 4500 V    | Set Dry Heater   | 180 °C    |
| Scan Begin  | 50 m/z   | Set End Plate Offset  | -500 V    | Set Dry Gas      | 4.0 l/min |
| Scan End    | 1000 m/z | Set Collision Cell RF | 300.0 Vpp | Set Divert Valve | Waste     |

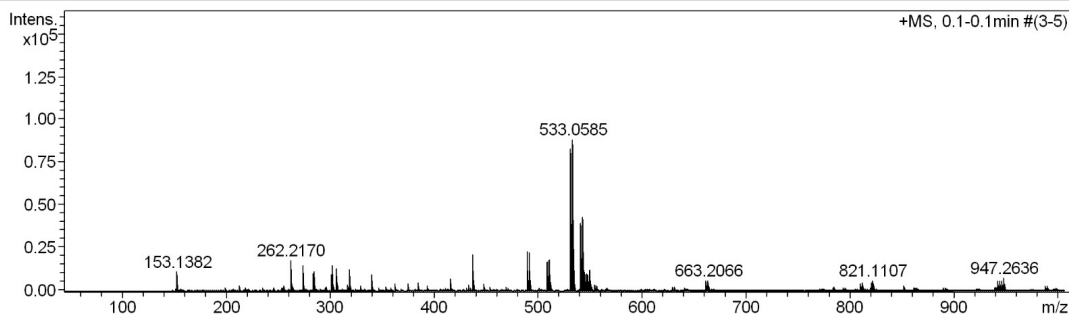

| Meas. #  | Formula                                                               | m/z      | err [ppm] | Me an err [ppm] | rdb  | N-R | ej% Conf | mSi gm a | Std l | St d l | St d l | St d l | Std Com b |
|----------|-----------------------------------------------------------------------|----------|-----------|-----------------|------|-----|----------|----------|-------|--------|--------|--------|-----------|
| 531.0600 | 1 C <sub>25</sub> H <sub>19</sub> BrF <sub>2</sub> N <sub>4</sub> NaO | 531.0603 | 0.6       | 0.4             | 16.5 | ok  | even     | 22.2     | 17.7  | 0.5    | 5.9    | 0.7    | 842.7     |

NMR copies of compound (*cis*)-**3f**:

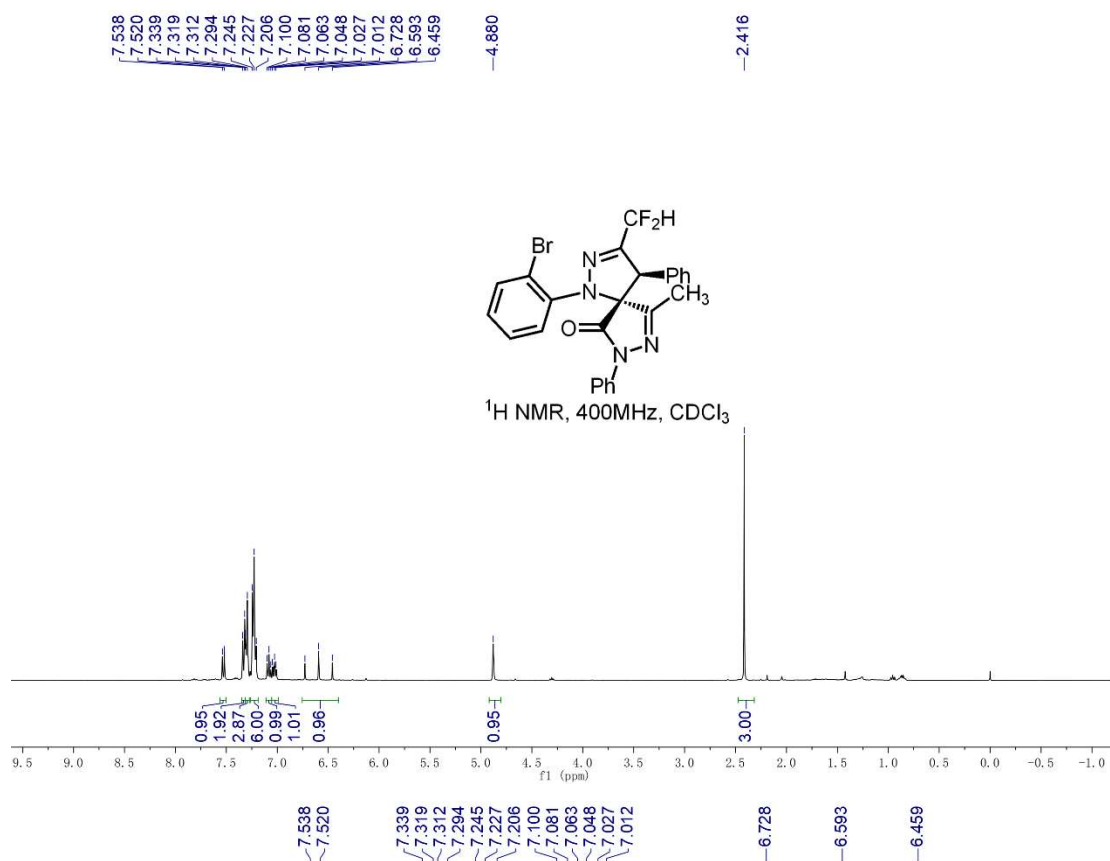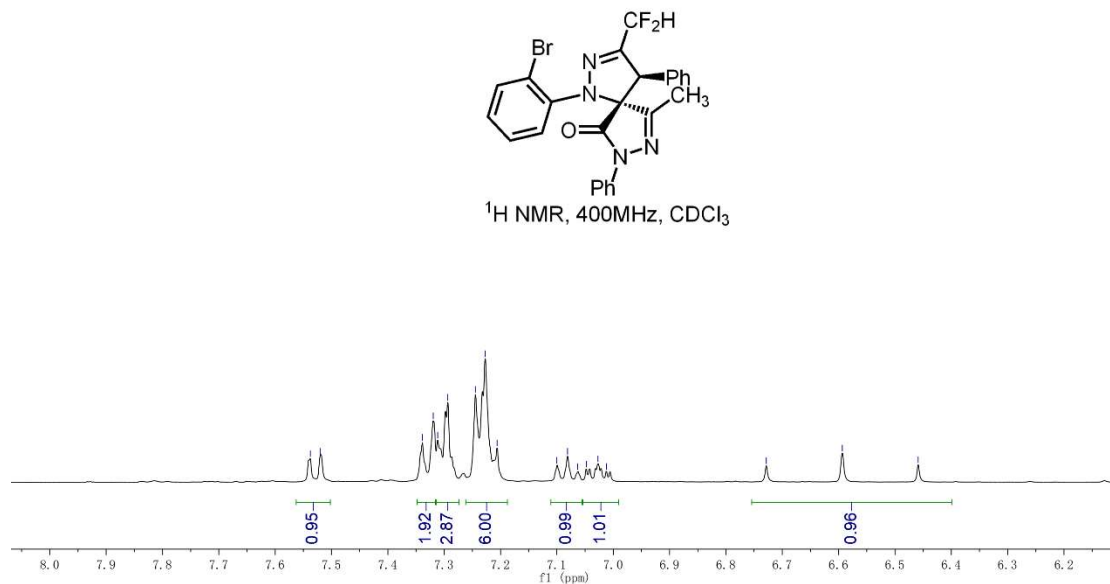

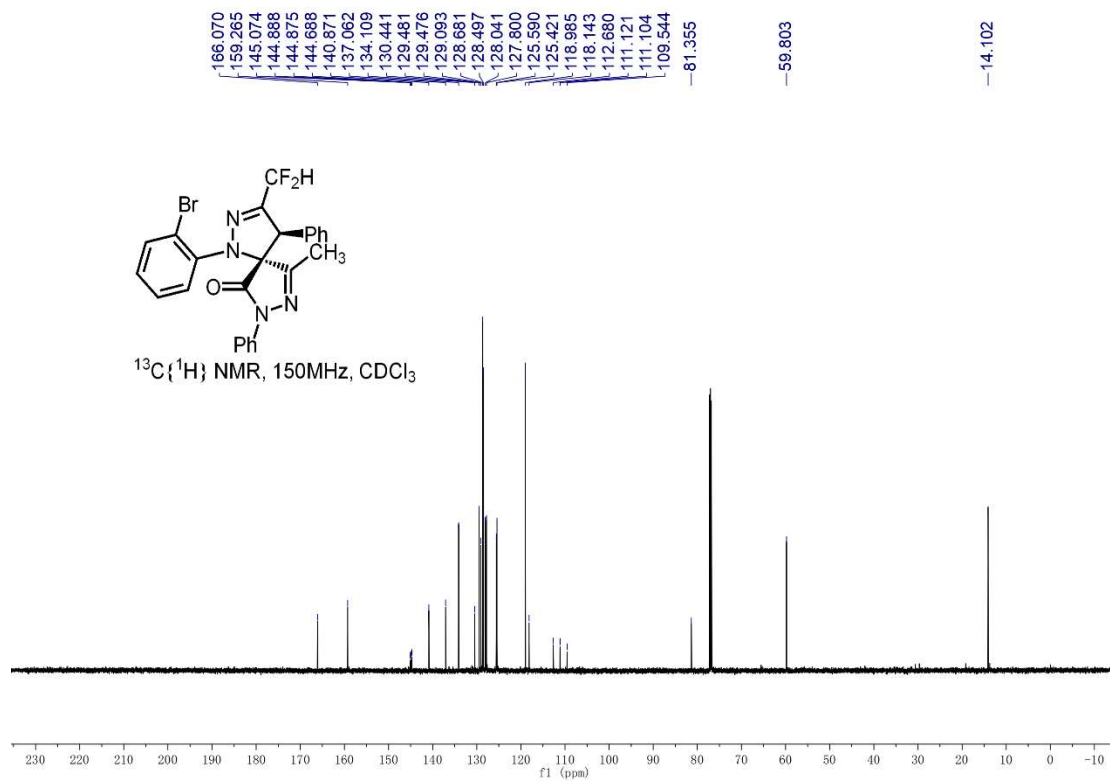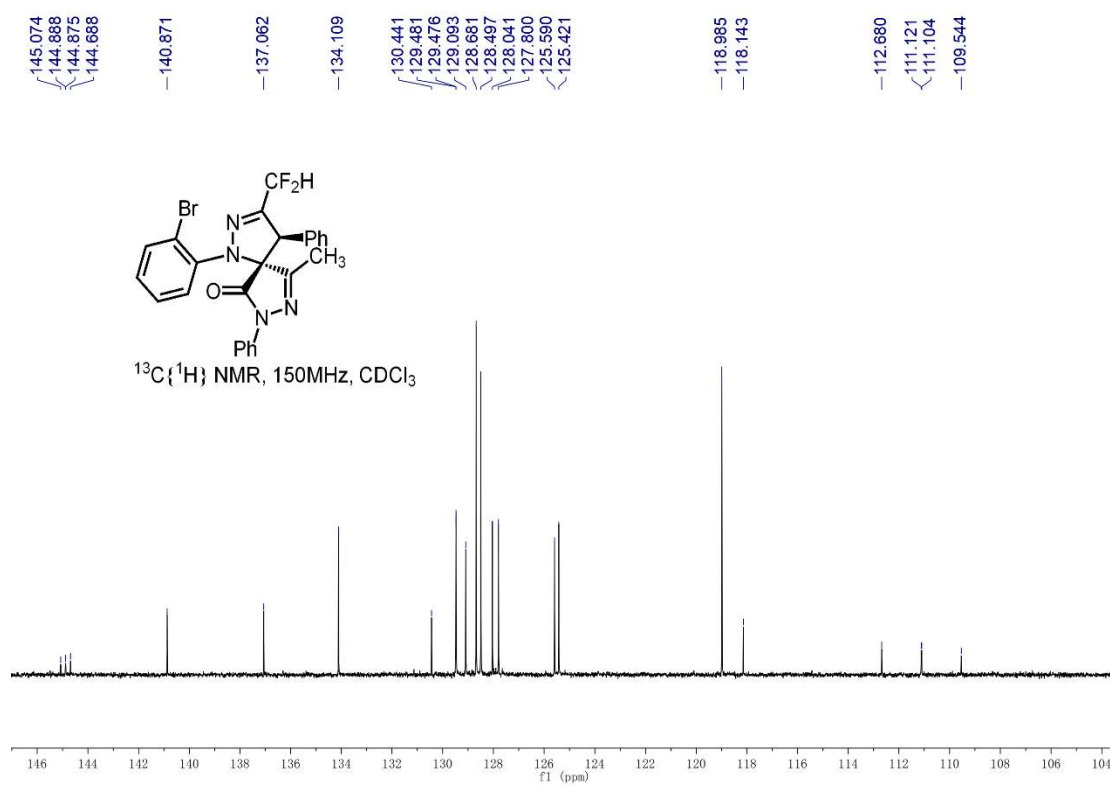

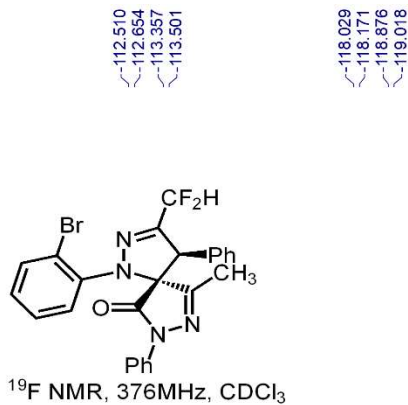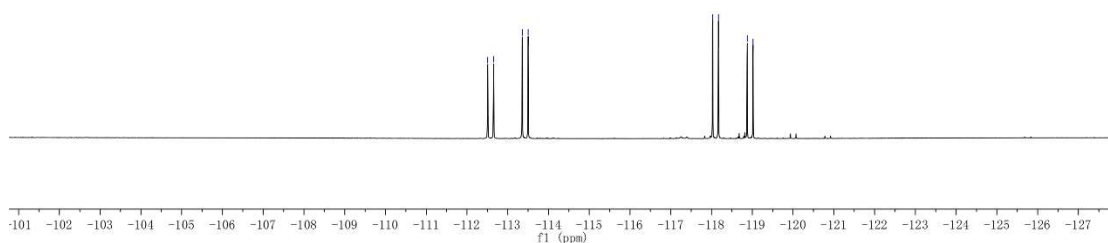

HRMS (ESI) copy of compound (*cis*)-**3f**:

### Mass Spectrum SmartFormula Report

**Analysis Info**

Analysis Name D:\Data\user\NWNNU-fengyang 20230321-2.d  
 Method tune\_low.m  
 Sample Name A-181  
 Comment

Acquisition Date 2023-3-21 15:31:47  
 Operator BDAL@DE  
 Instrument / Ser# micrOTOF-Q 20453

**Acquisition Parameter**

|             |          |                       |           |                  |                     |
|-------------|----------|-----------------------|-----------|------------------|---------------------|
| Source Type | ESI      | Ion Polarity          | Positive  | Set Nebulizer    | 0.4 Bar             |
| Focus       | Active   | Set Capillary         | 4500 V    | Set Dry Heater   | 180 $\mu\text{A}$ C |
| Scan Begin  | 50 m/z   | Set End Plate Offset  | -500 V    | Set Dry Gas      | 4.0 l/min           |
| Scan End    | 1000 m/z | Set Collision Cell RF | 300.0 Vpp | Set Divert Valve | Waste               |

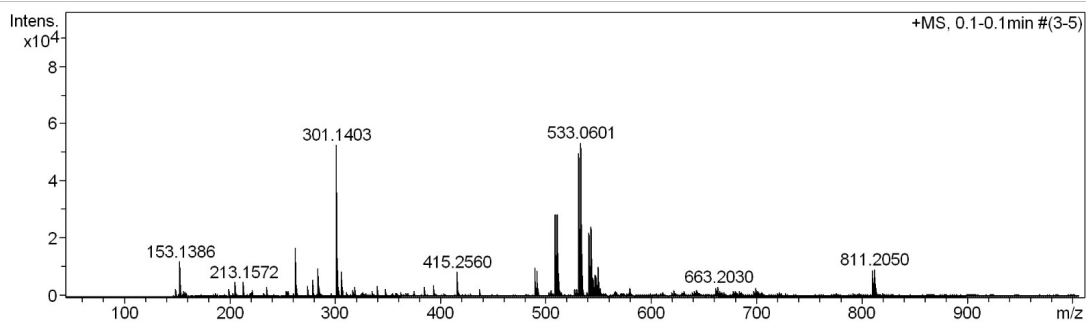

| Meas. #  | Formula                                                               | m/z      | err [ppm] | Me an err [ppm] | rdb  | N-R | e;f  | Con  | mSi gm | Std l | St d | St d l | St d m/ | Std Com b |
|----------|-----------------------------------------------------------------------|----------|-----------|-----------------|------|-----|------|------|--------|-------|------|--------|---------|-----------|
| 531.0612 | 1 C <sub>25</sub> H <sub>19</sub> BrF <sub>2</sub> N <sub>4</sub> NaO | 531.0603 | -1.7      | -1.6            | 16.5 | ok  | even | 28.0 | 23.9   | 1.3   | 8.3  | 1.8    | 842.7   |           |

NMR copies of compound (*trans*)-**3g**:

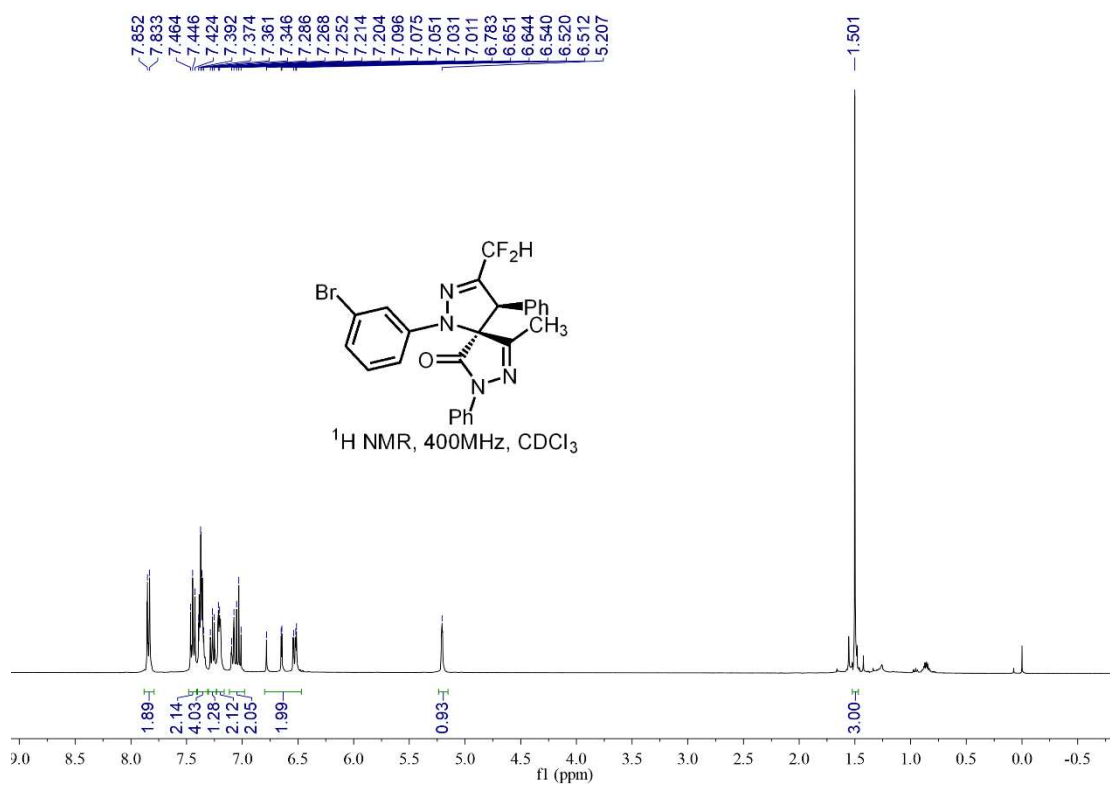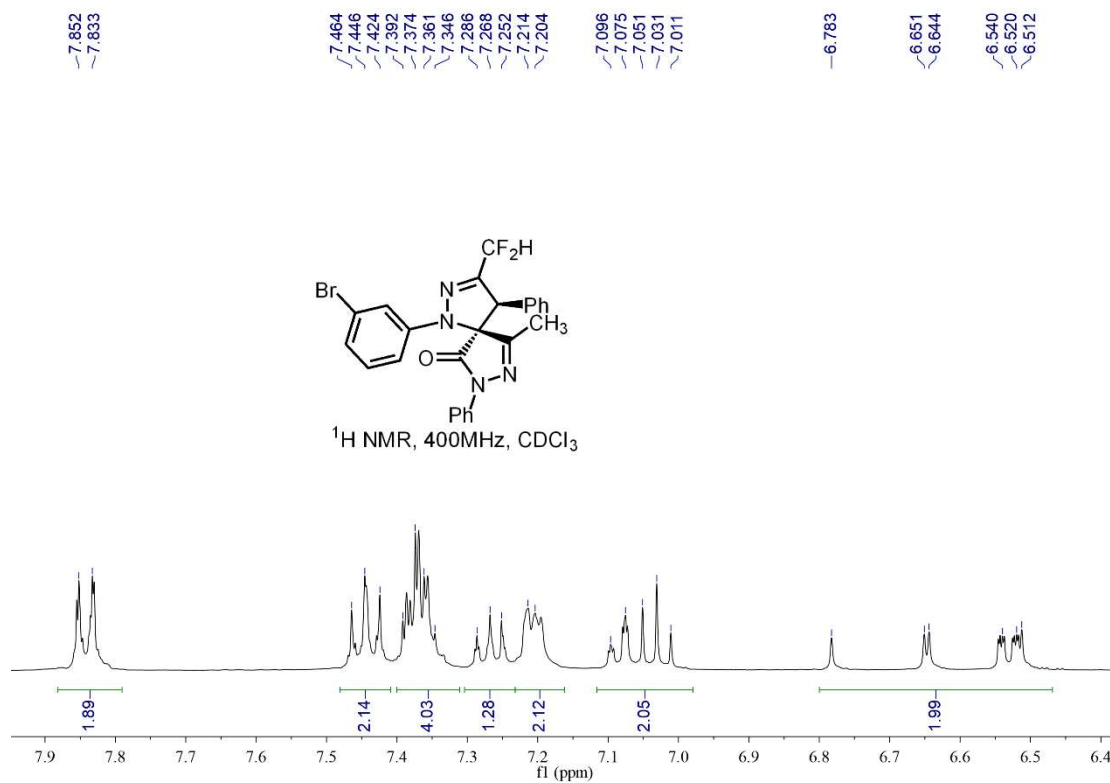

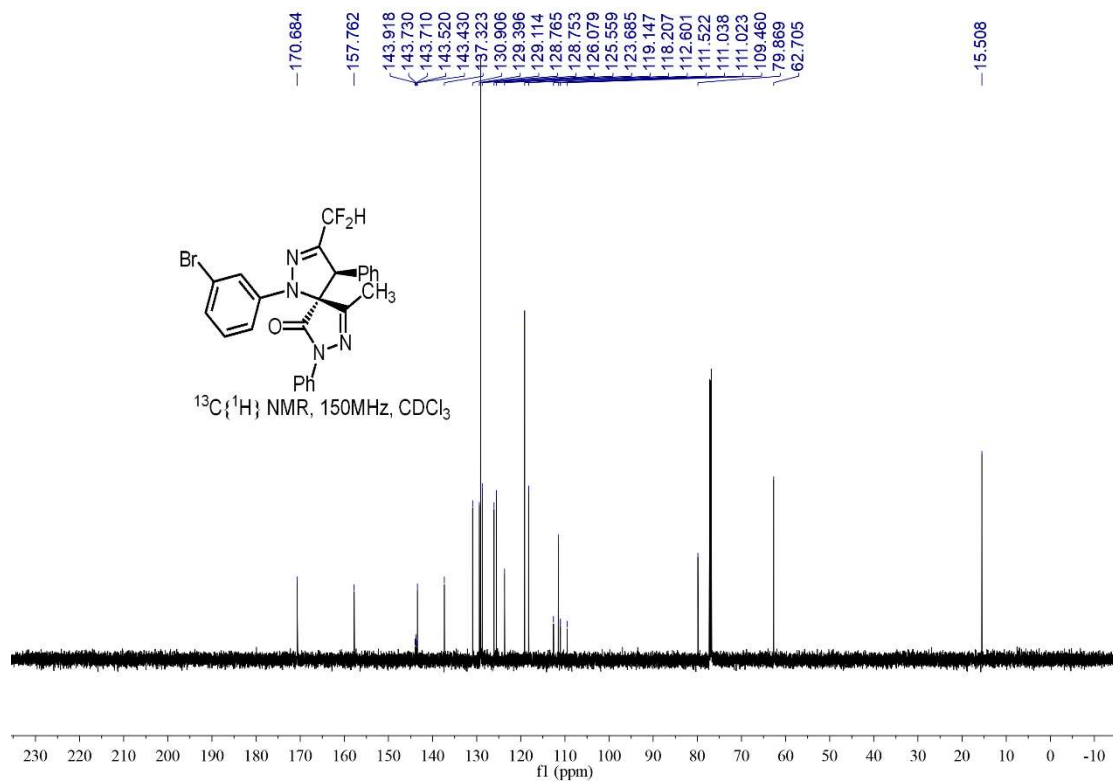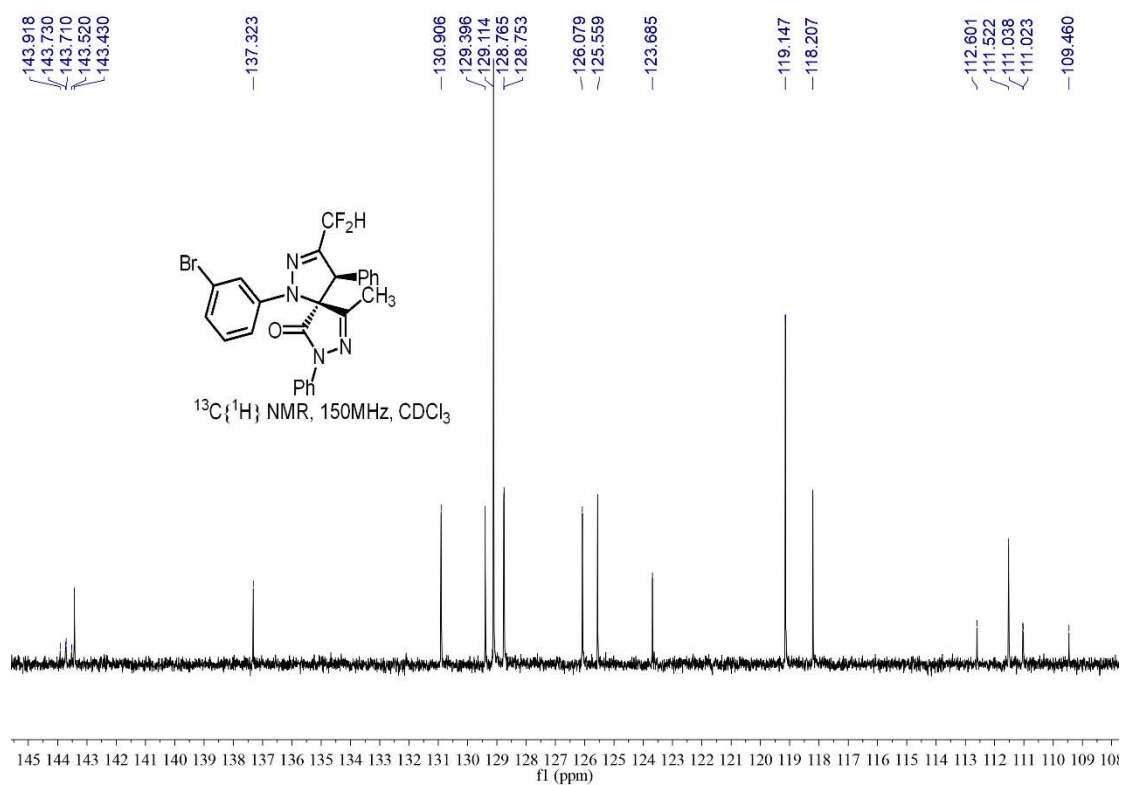



-109.412  
-109.560  
-110.263  
-110.410

-120.248  
-120.388  
-121.098  
-121.238

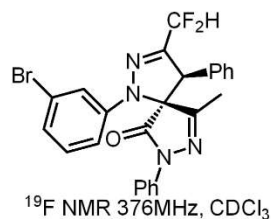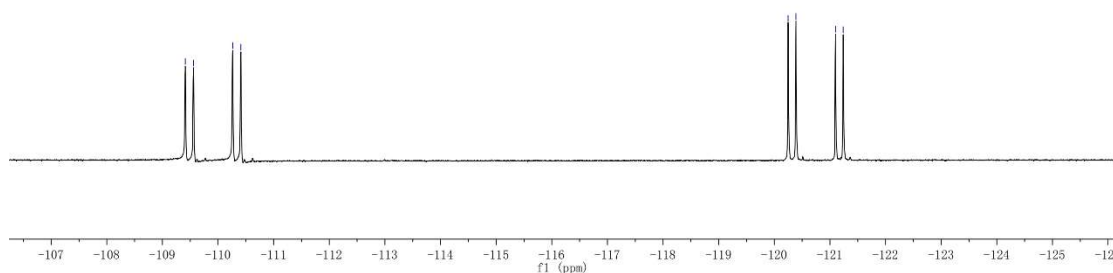

HRMS (ESI) copy of compound (*trans*)-**3g**:

### Mass Spectrum SmartFormula Report

#### Analysis Info

Analysis Name D:\Data\user\NWNU-fengyang 20220609-4.d  
Method tune\_low.m  
Sample Name A-19  
Comment

Acquisition Date 2022-6-9 14:42:26

Operator BDAL@DE  
Instrument / Ser# micrOTOF-Q 20453

#### Acquisition Parameter

|             |          |                       |           |                  |                        |
|-------------|----------|-----------------------|-----------|------------------|------------------------|
| Source Type | ESI      | Ion Polarity          | Positive  | Set Nebulizer    | 0.4 Bar                |
| Focus       | Active   | Set Capillary         | 4500 V    | Set Dry Heater   | 180 $^{\circ}\text{C}$ |
| Scan Begin  | 100 m/z  | Set End Plate Offset  | -500 V    | Set Dry Gas      | 4.0 l/min              |
| Scan End    | 1000 m/z | Set Collision Cell RF | 500.0 Vpp | Set Divert Valve | Waste                  |

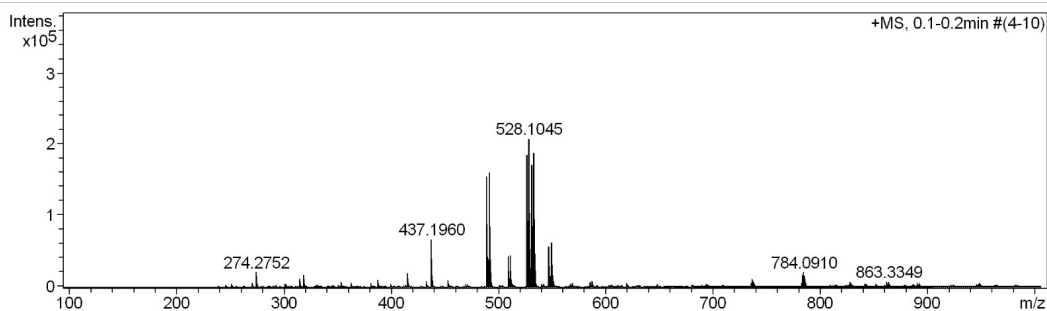

| Meas. #<br>m/z | Formula                                                               | m/z      | err<br>[ppm] | Me<br>an<br>err<br>[ppm] | rdb  | N-<br>R<br>ul<br>e | e<br>j<br>Con<br>f | mSi<br>gm<br>a | Std<br>l | St<br>d<br>M<br>ea<br>n<br>m/<br>z | St<br>d<br>l<br>Va<br>r<br>i<br>a<br>n<br>c<br>e | St<br>d<br>m/<br>z | Std<br>Com<br>b<br>Dev |
|----------------|-----------------------------------------------------------------------|----------|--------------|--------------------------|------|--------------------|--------------------|----------------|----------|------------------------------------|--------------------------------------------------|--------------------|------------------------|
| 531.0621       | 1 C <sub>25</sub> H <sub>19</sub> BrF <sub>2</sub> N <sub>4</sub> NaO | 531.0603 | -3.5         | -3.1                     | 16.5 | ok                 | even               | 36.9           | 23.4     | 1.7                                | 7.3                                              | 0.7                | 842.7                  |

NMR copies of compound (*cis*)-**3g**:

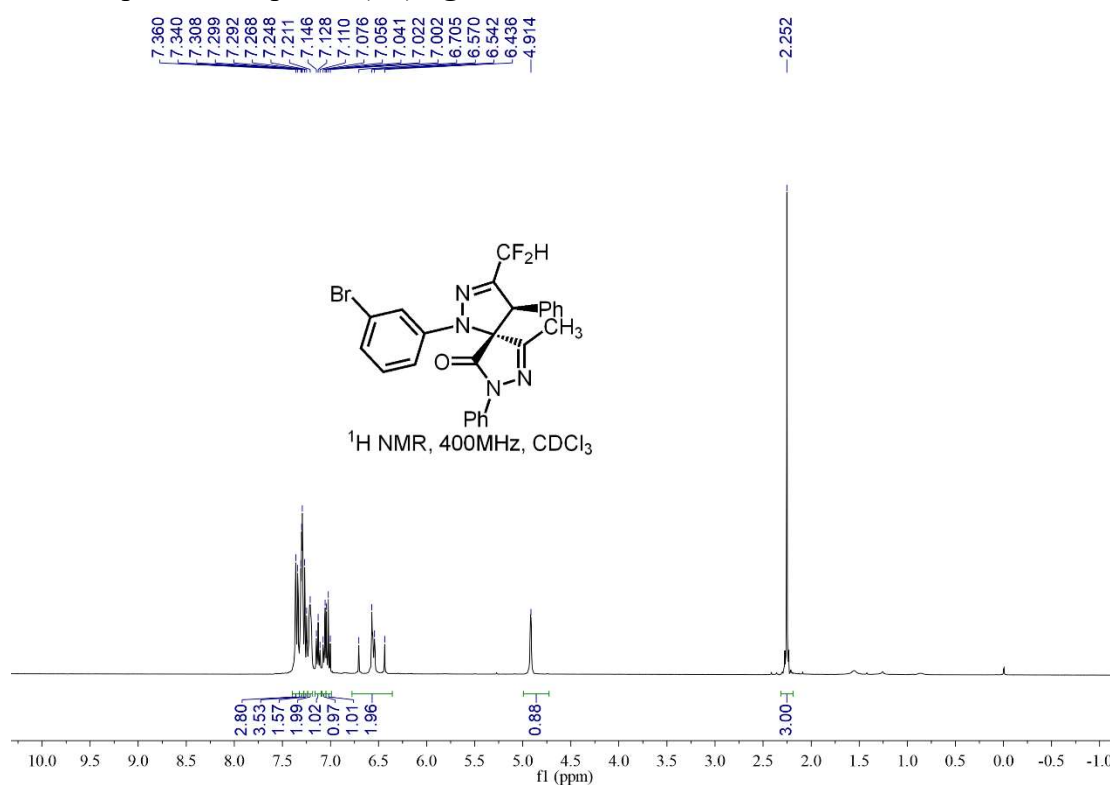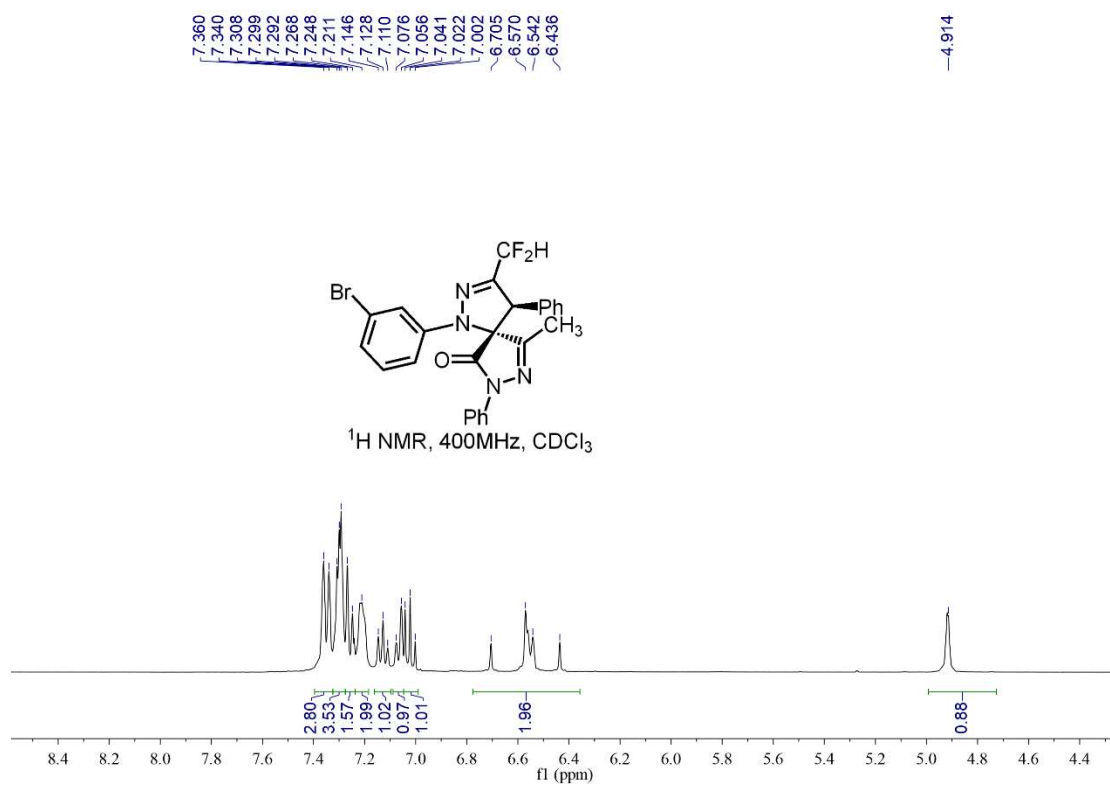

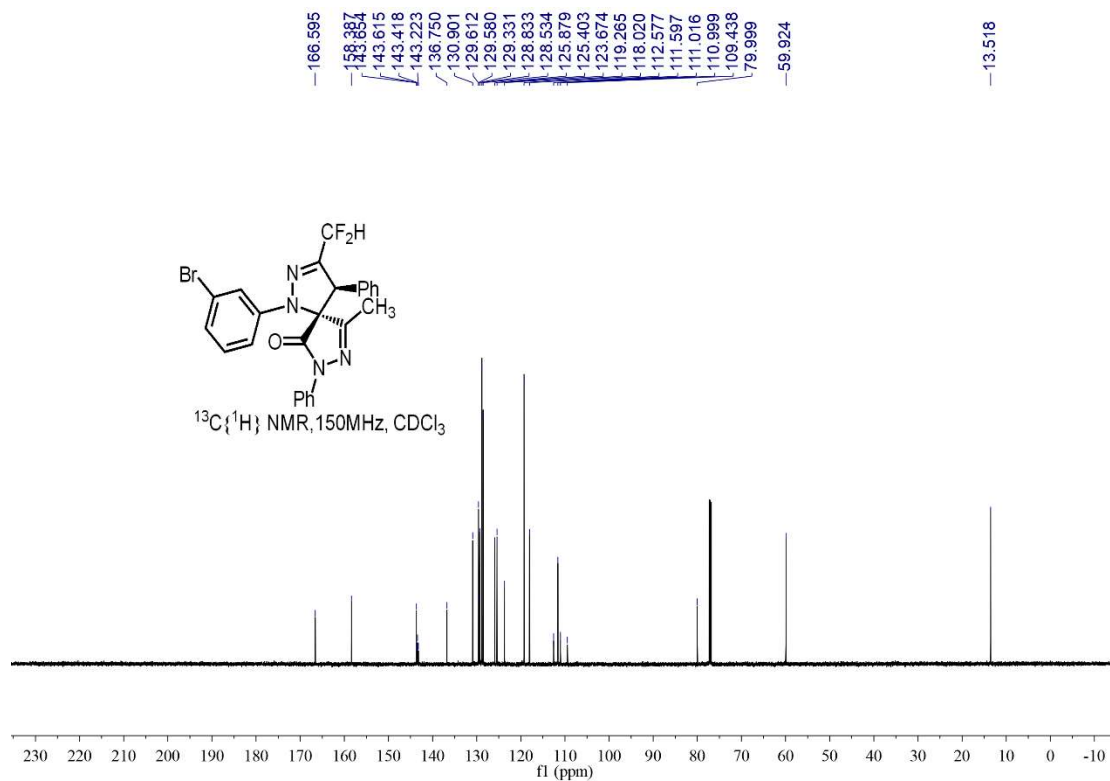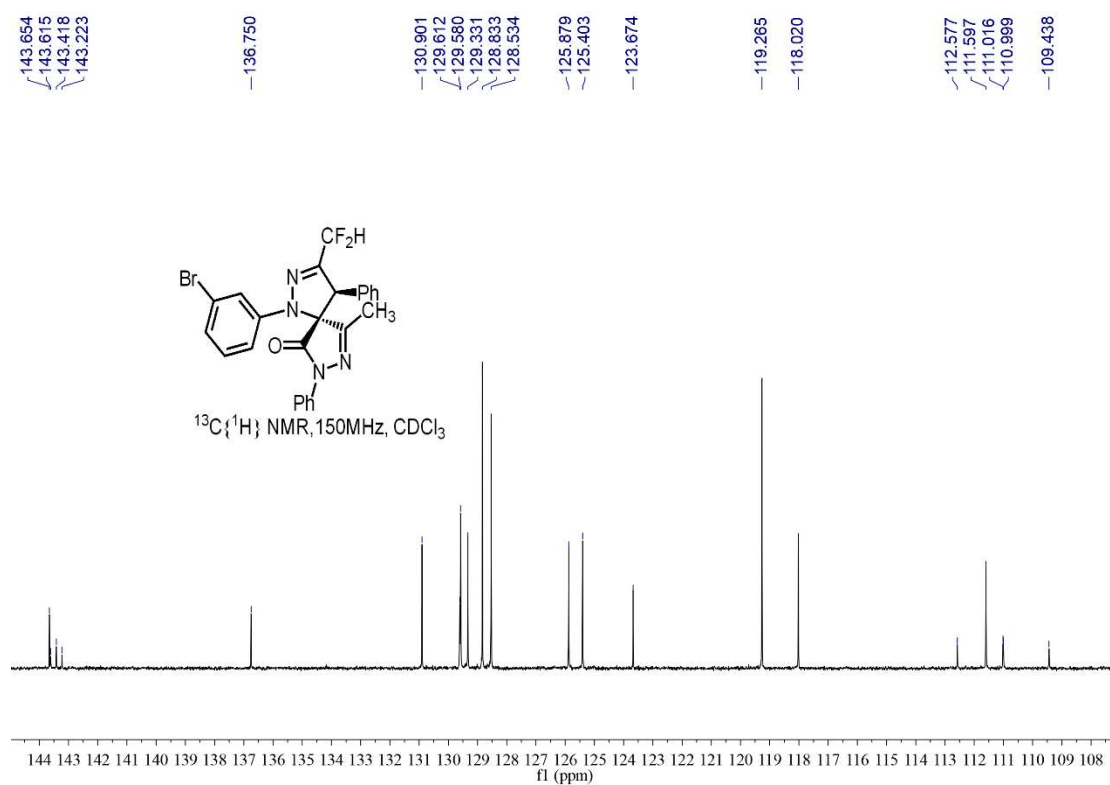

-112.459  
-112.603  
-113.307  
-113.452

-119.177  
-119.319  
-120.026  
-120.168

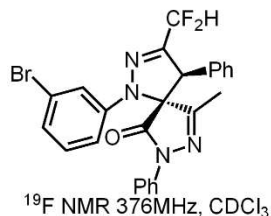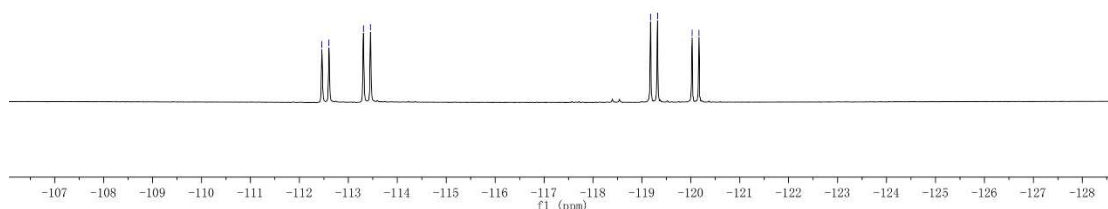

HRMS (ESI) copy of compound (*cis*)-**3g**:

### Mass Spectrum SmartFormula Report

#### Analysis Info

Analysis Name D:\Data\user\NWNW-fengyang 20220609-5.d  
Method tune\_low.m  
Sample Name A-191  
Comment

Acquisition Date 2022-6-9 14:43:53

Operator BDAL@DE  
Instrument / Ser# micrOTOF-Q 20453

#### Acquisition Parameter

|             |          |                       |           |                  |           |
|-------------|----------|-----------------------|-----------|------------------|-----------|
| Source Type | ESI      | Ion Polarity          | Positive  | Set Nebulizer    | 0.4 Bar   |
| Focus       | Active   | Set Capillary         | 4500 V    | Set Dry Heater   | 180 j°C   |
| Scan Begin  | 100 m/z  | Set End Plate Offset  | -500 V    | Set Dry Gas      | 4.0 l/min |
| Scan End    | 1000 m/z | Set Collision Cell RF | 500.0 Vpp | Set Divert Valve | Waste     |

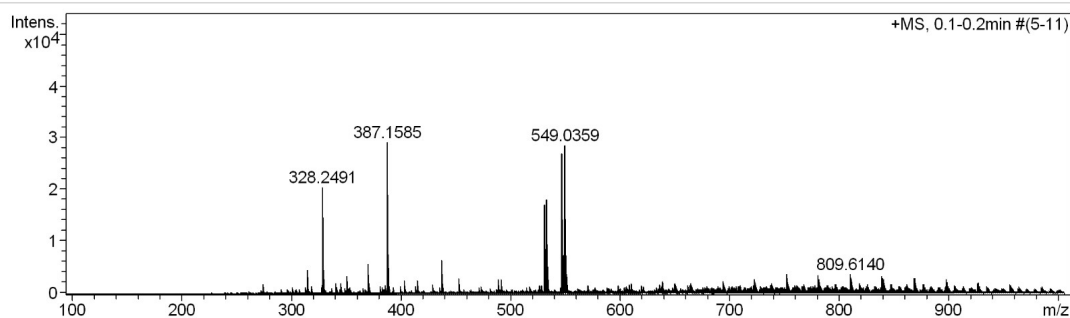

| Meas. #  | Formula                                                               | m/z      | err [ppm] | Me an err [ppm] | rdb  | N  | e <sub>i</sub> % | mSi  | Std  | St  | Std  | St  | Std   |
|----------|-----------------------------------------------------------------------|----------|-----------|-----------------|------|----|------------------|------|------|-----|------|-----|-------|
| m/z      |                                                                       |          |           |                 |      | R  | Con              | gm   | l    | d   | Var  | m/  | d     |
|          |                                                                       |          |           |                 |      | ul | e                | a    |      | M   | Nor  | m/  | z     |
|          |                                                                       |          |           |                 |      |    |                  |      |      | ea  | m    | Dif | f     |
|          |                                                                       |          |           |                 |      |    |                  |      |      | n   |      |     |       |
|          |                                                                       |          |           |                 |      |    |                  |      |      | m/  |      |     |       |
|          |                                                                       |          |           |                 |      |    |                  |      |      | z   |      |     |       |
| 531.0625 | 1 C <sub>25</sub> H <sub>19</sub> BrF <sub>2</sub> N <sub>4</sub> NaO | 531.0603 | -4.2      | -3.8            | 16.5 | ok | even             | 29.5 | 26.0 | 2.1 | 12.5 | 0.5 | 842.7 |

NMR copies of compound (*trans*)-**3h**:

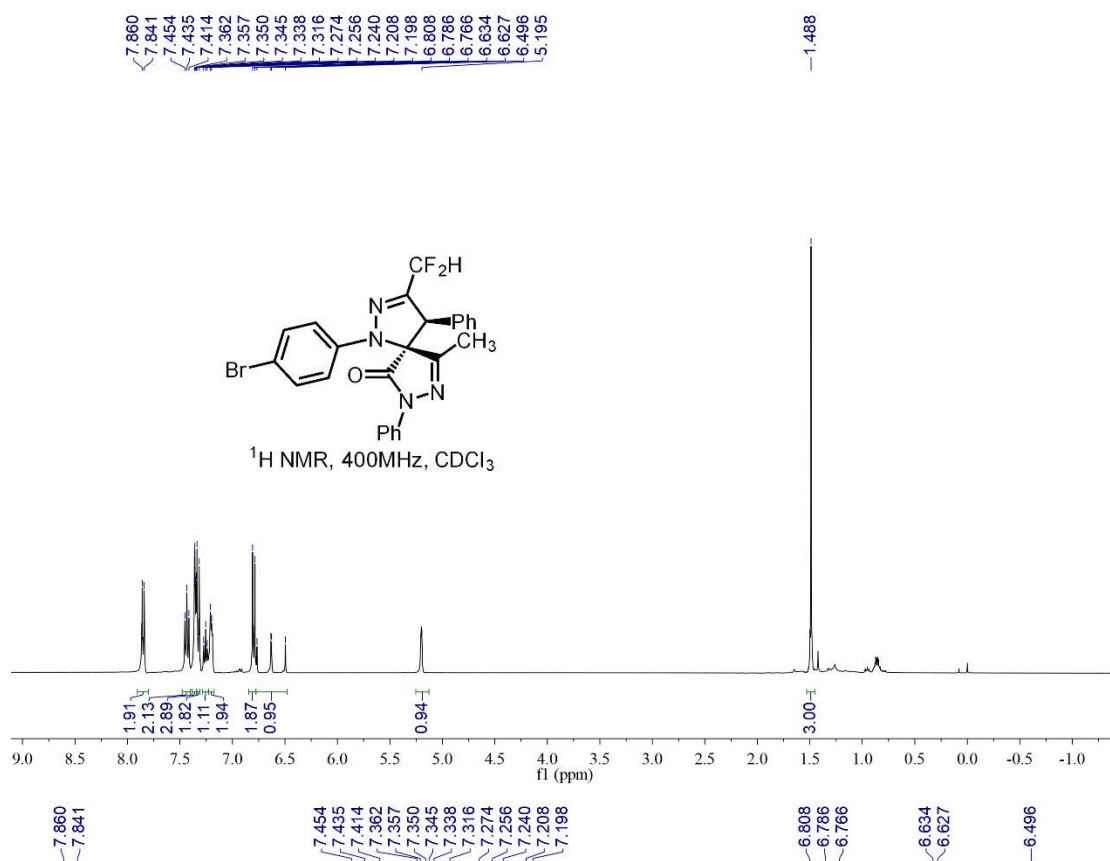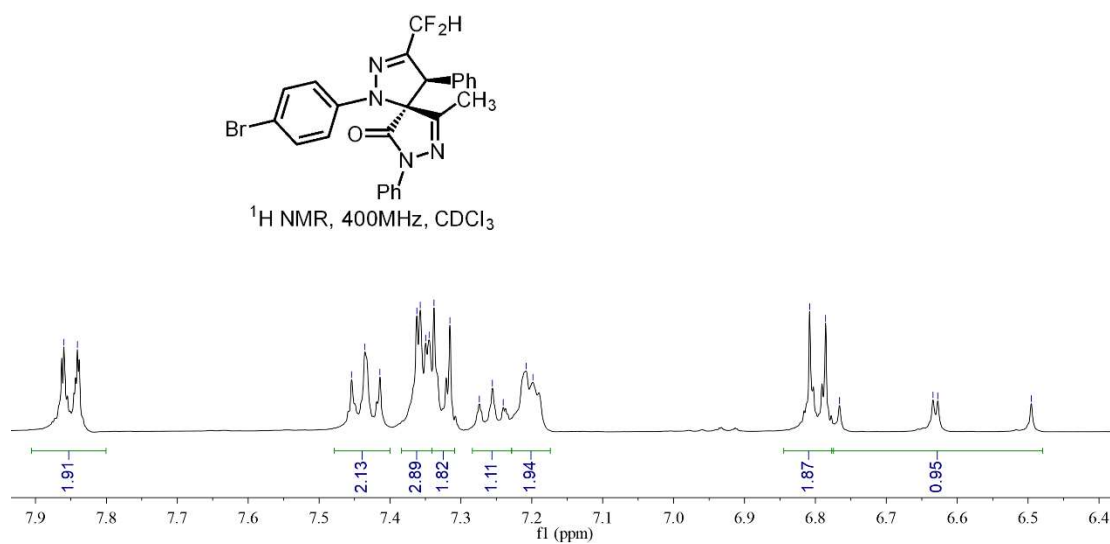

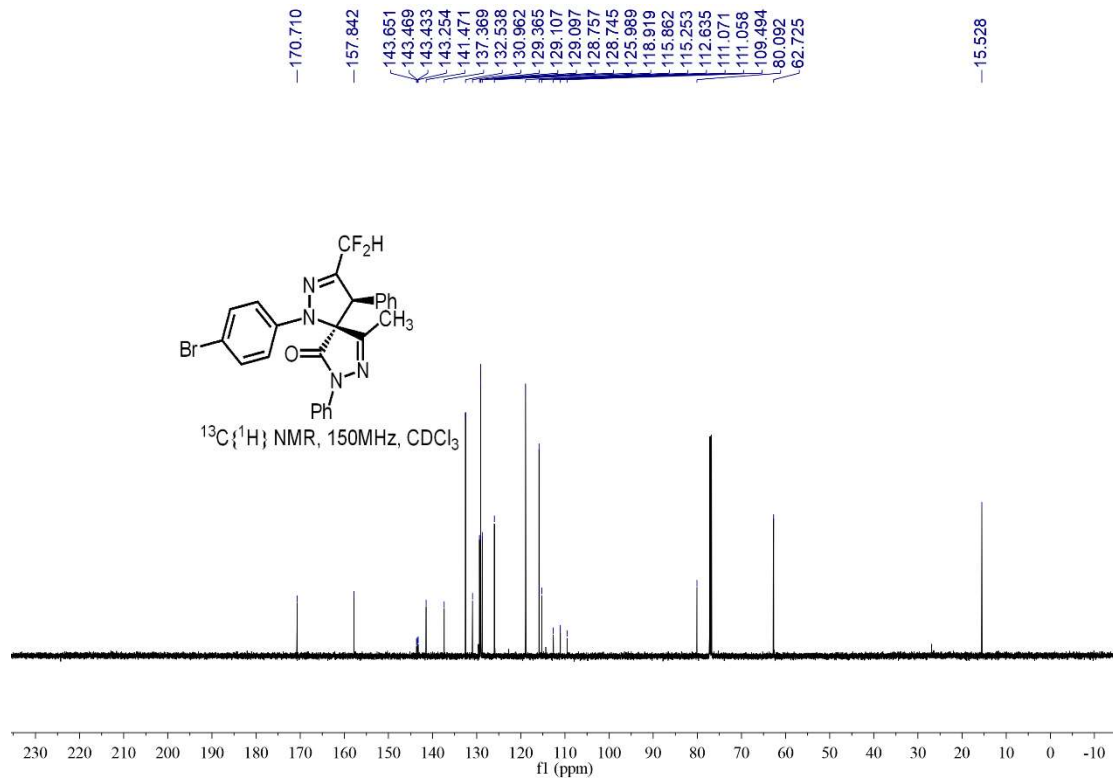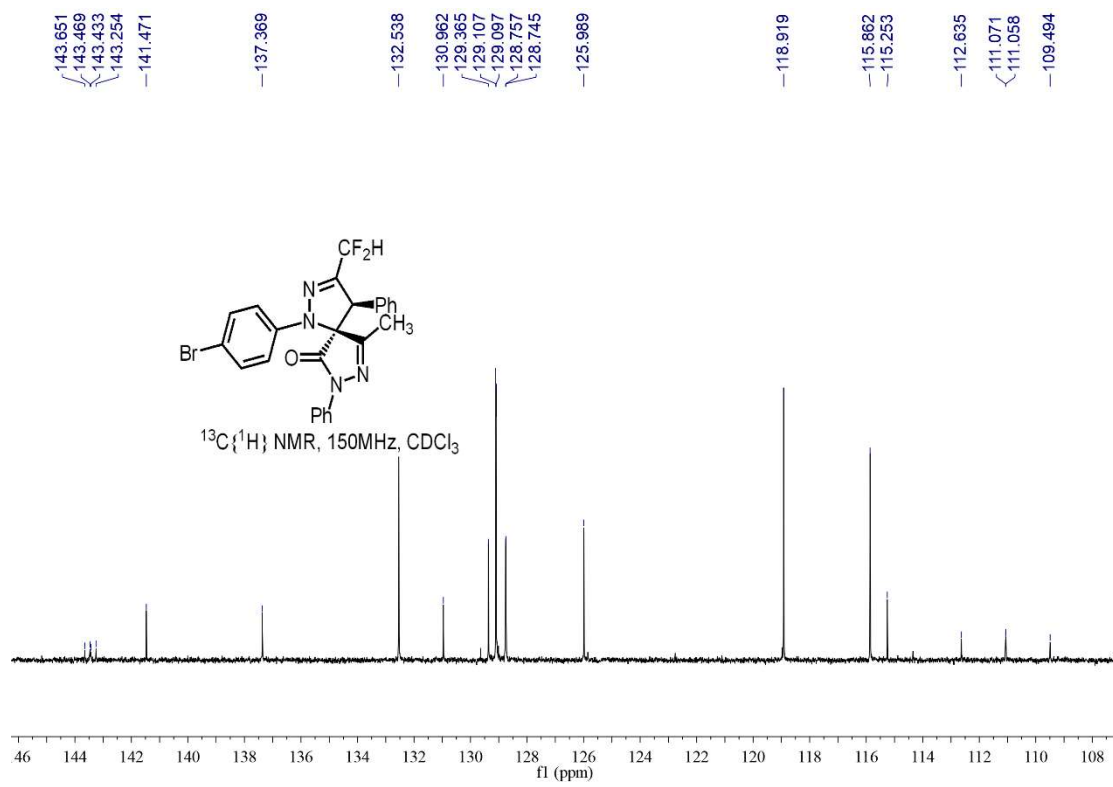

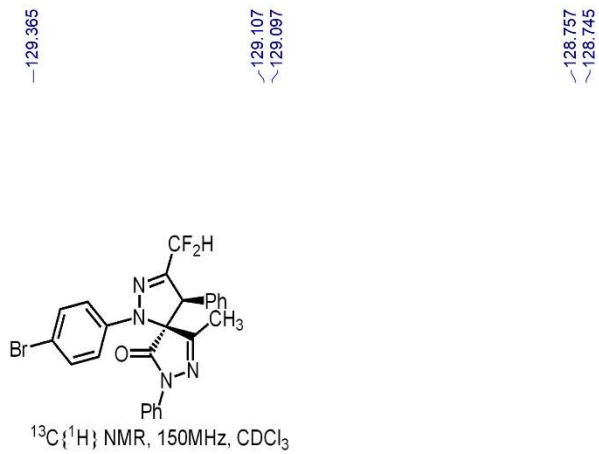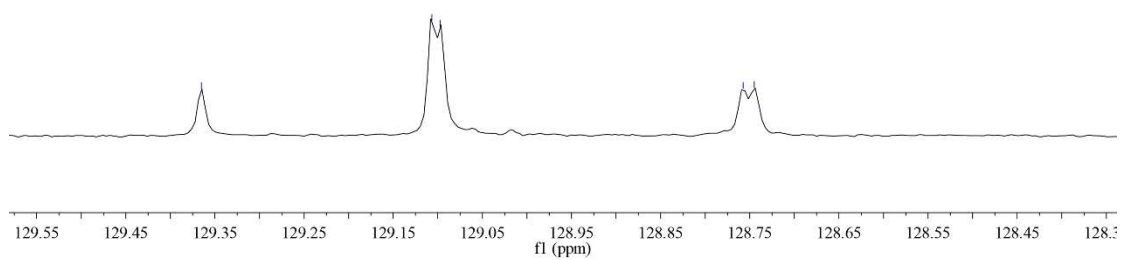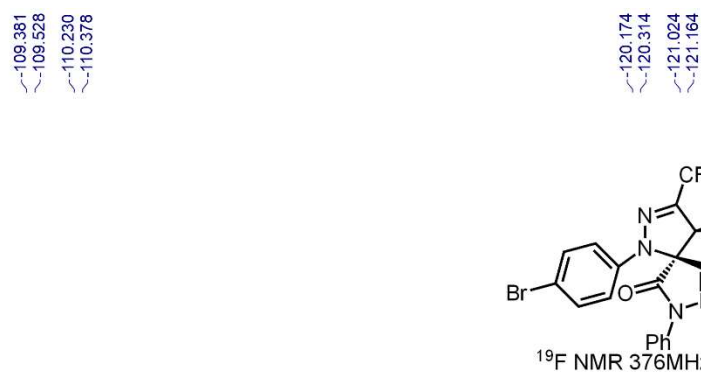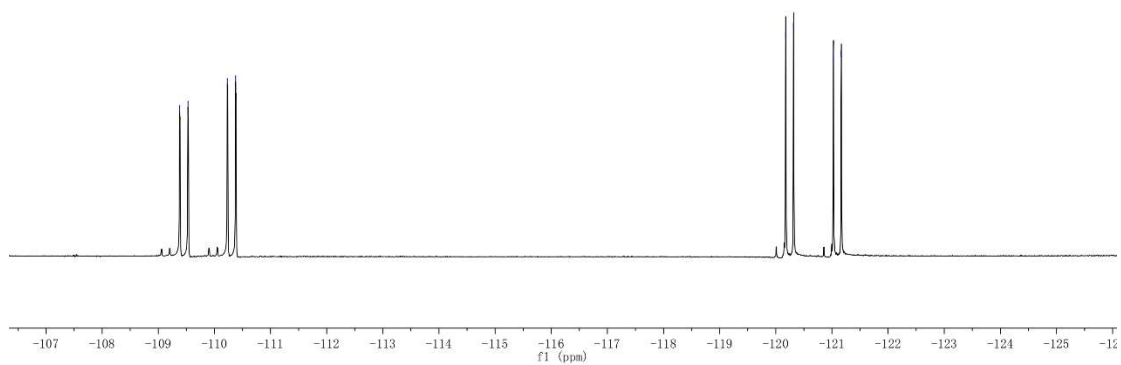

HRMS (ESI) copy of compound (*trans*)-3h:

Mass Spectrum SmartFormula Report

Analysis Info

Analysis Name D:\Data\user\fengyang 20220616-16.d  
 Method tune\_low.m  
 Sample Name A-16  
 Comment

Acquisition Date 2022-6-16 11:00:38  
 Operator BDAL@DE  
 Instrument / Ser# micrOTOF-Q 20453

Acquisition Parameter

|             |          |                       |           |                  |           |
|-------------|----------|-----------------------|-----------|------------------|-----------|
| Source Type | ESI      | Ion Polarity          | Positive  | Set Nebulizer    | 0.4 Bar   |
| Focus       | Active   | Set Capillary         | 4500 V    | Set Dry Heater   | 180 j°C   |
| Scan Begin  | 100 m/z  | Set End Plate Offset  | -500 V    | Set Dry Gas      | 2.0 l/min |
| Scan End    | 1000 m/z | Set Collision Cell RF | 300.0 Vpp | Set Divert Valve | Waste     |

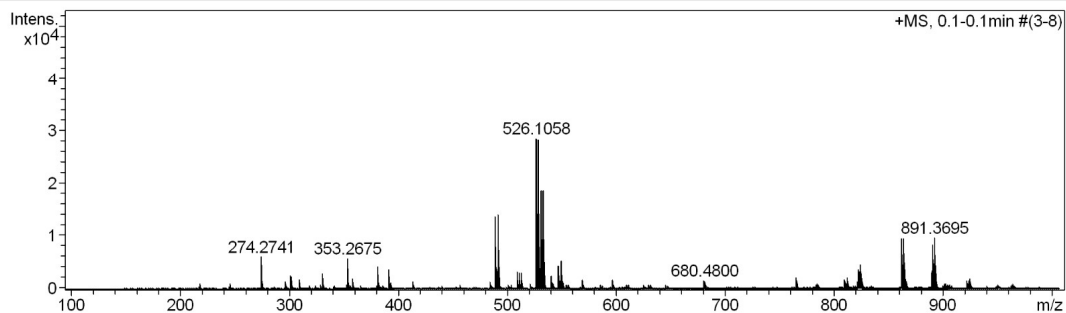

| Meas. #  | m/z | Formula                                                           | m/z      | err [ppm] | Mean err [ppm] | rdb  | N-Rule | e | Conf | mSig | Std I | Std Mean m/z | Std VarN | Std m/z | Std Comb Dev |
|----------|-----|-------------------------------------------------------------------|----------|-----------|----------------|------|--------|---|------|------|-------|--------------|----------|---------|--------------|
| 526.1058 | 1   | C <sub>25</sub> H <sub>23</sub> BrF <sub>2</sub> N <sub>5</sub> O | 526.1049 | -1.8      | -2.3           | 15.5 | ok     |   | even | 8.5  | 6.9   | 1.3          | 2.4      | 0.4     | 842.7        |



NMR copies of compound (*cis*)-**3h**:

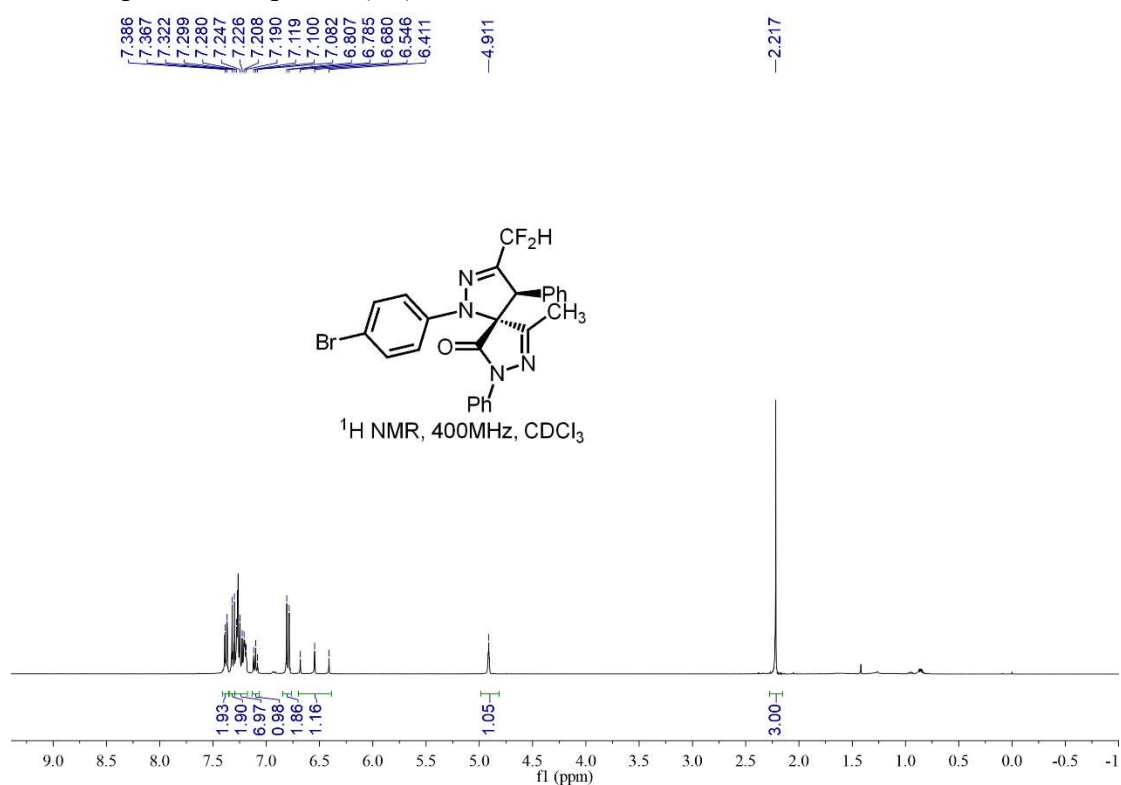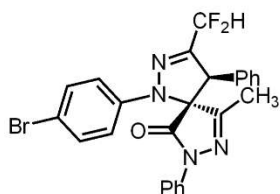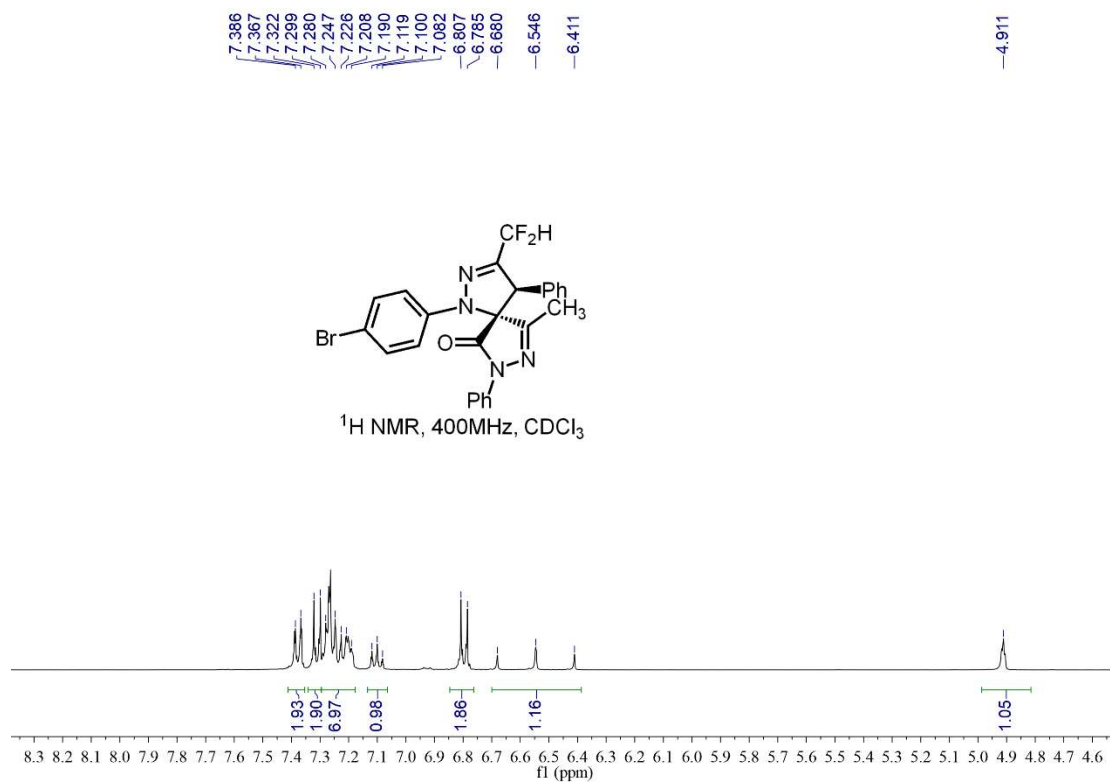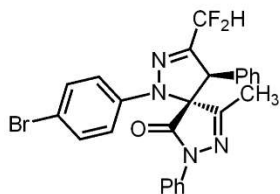

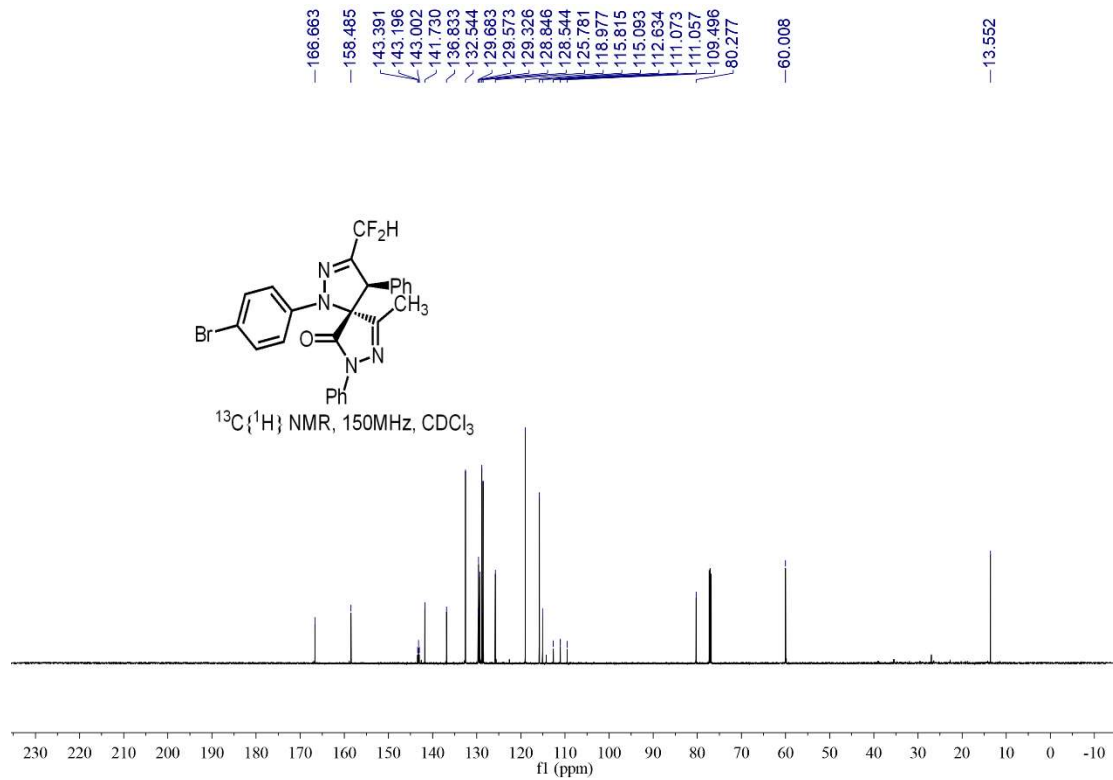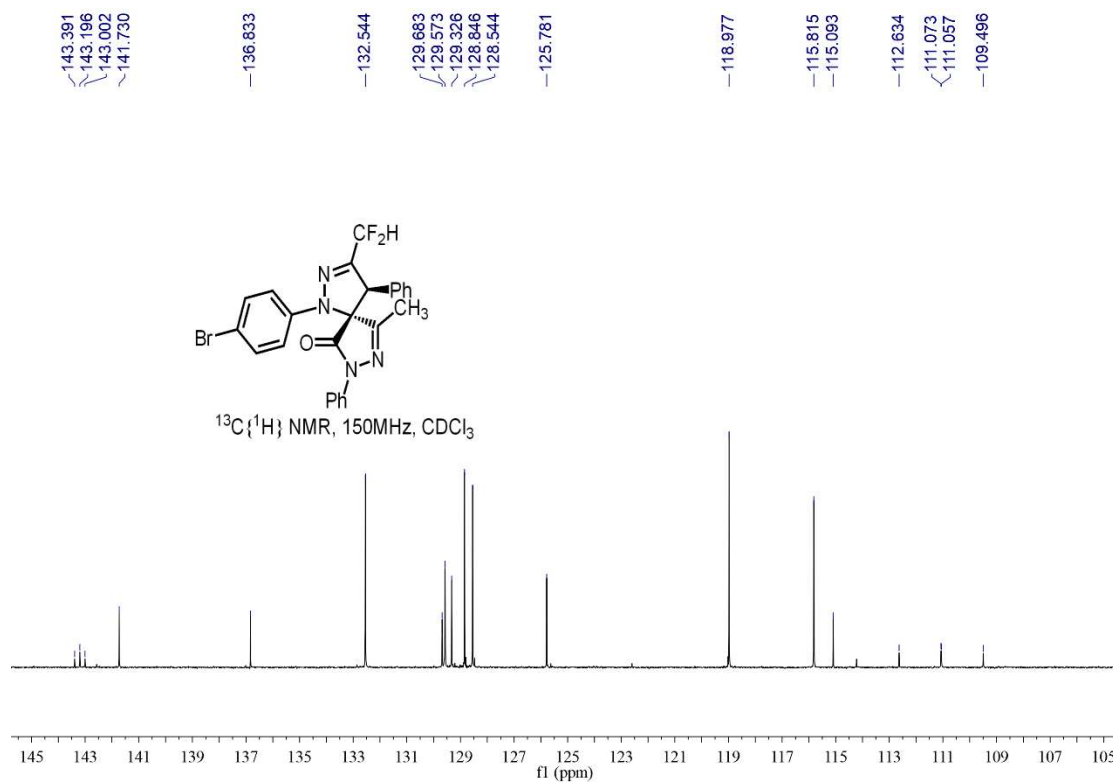

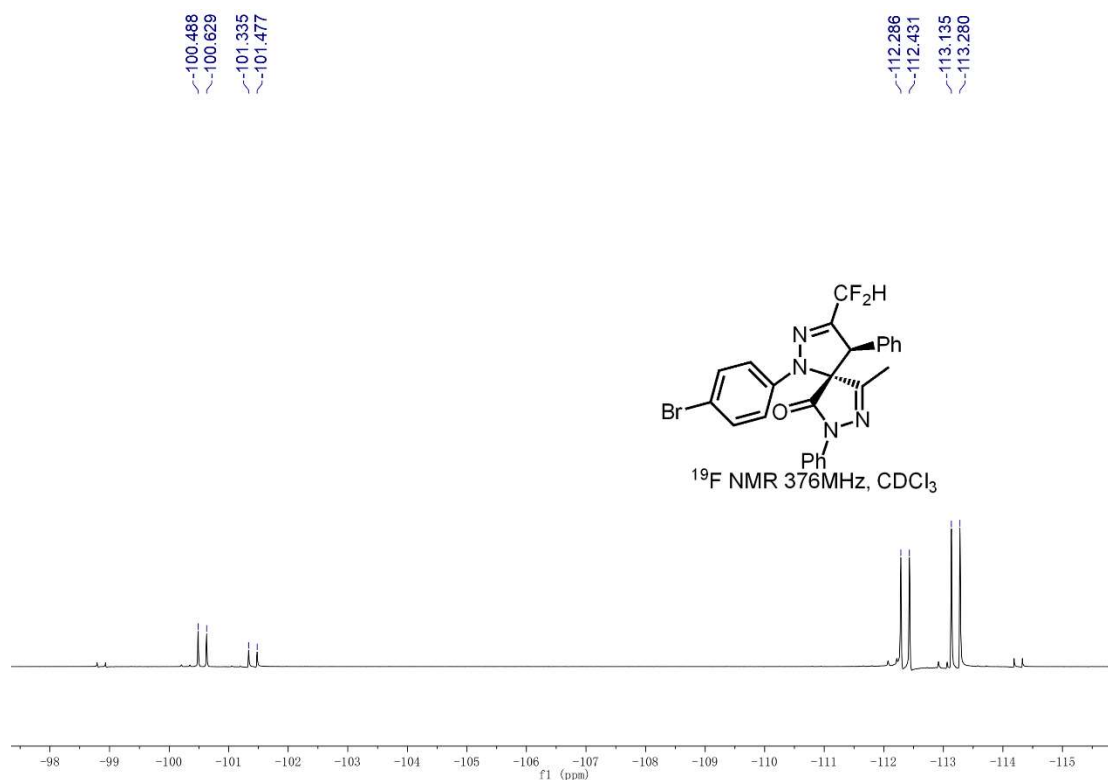

HRMS (ESI) copy of compound (*cis*)-**3h**:

### Mass Spectrum SmartFormula Report

#### Analysis Info

Analysis Name D:\Data\user\fengyang 20220616--17.d  
 Method tune\_low.m  
 Sample Name A-161  
 Comment

Acquisition Date 2022-6-16 11:05:13  
 Operator BDAL@DE  
 Instrument / Ser# micrOTOF-Q 20453

#### Acquisition Parameter

|             |          |                       |           |                  |           |
|-------------|----------|-----------------------|-----------|------------------|-----------|
| Source Type | ESI      | Ion Polarity          | Positive  | Set Nebulizer    | 0.4 Bar   |
| Focus       | Active   | Set Capillary         | 4500 V    | Set Dry Heater   | 180 j̇C   |
| Scan Begin  | 100 m/z  | Set End Plate Offset  | -500 V    | Set Dry Gas      | 2.0 l/min |
| Scan End    | 1000 m/z | Set Collision Cell RF | 300.0 Vpp | Set Divert Valve | Waste     |

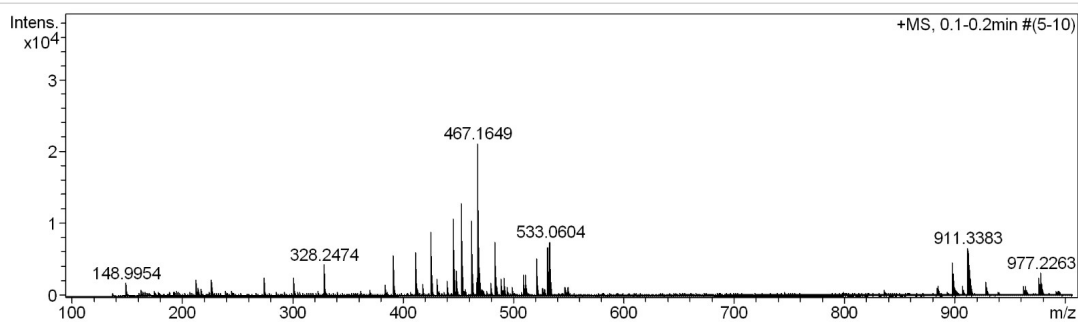

| Meas. #  | Formula                     | m/z      | err | Me  | rdb  | N- | e    | mSi  | Std  | St  | Std  | St  | Std   |
|----------|-----------------------------|----------|-----|-----|------|----|------|------|------|-----|------|-----|-------|
| m/z      |                             |          | [p  | an  |      | R  | Con  | gm   | l    | d   | l    | d   | Com   |
|          |                             |          | p   | err |      | ul | f    | a    | Me   | Var | m/   | z   | b     |
|          |                             |          | m]  | [p  |      | e  |      |      | an   | Nor | m    | Dif | Dev   |
|          |                             |          | m]  |     |      |    |      |      | m/   | m   | f    |     |       |
| 531.0591 | 1 C 25 H 19 Br F 2 N 4 Na O | 531.0603 | 2.2 | 0.8 | 16.5 | ok | even | 41.4 | 28.3 | 2.4 | 12.5 | 4.3 | 842.7 |

NMR copies of compound (*trans*)-**3i**:

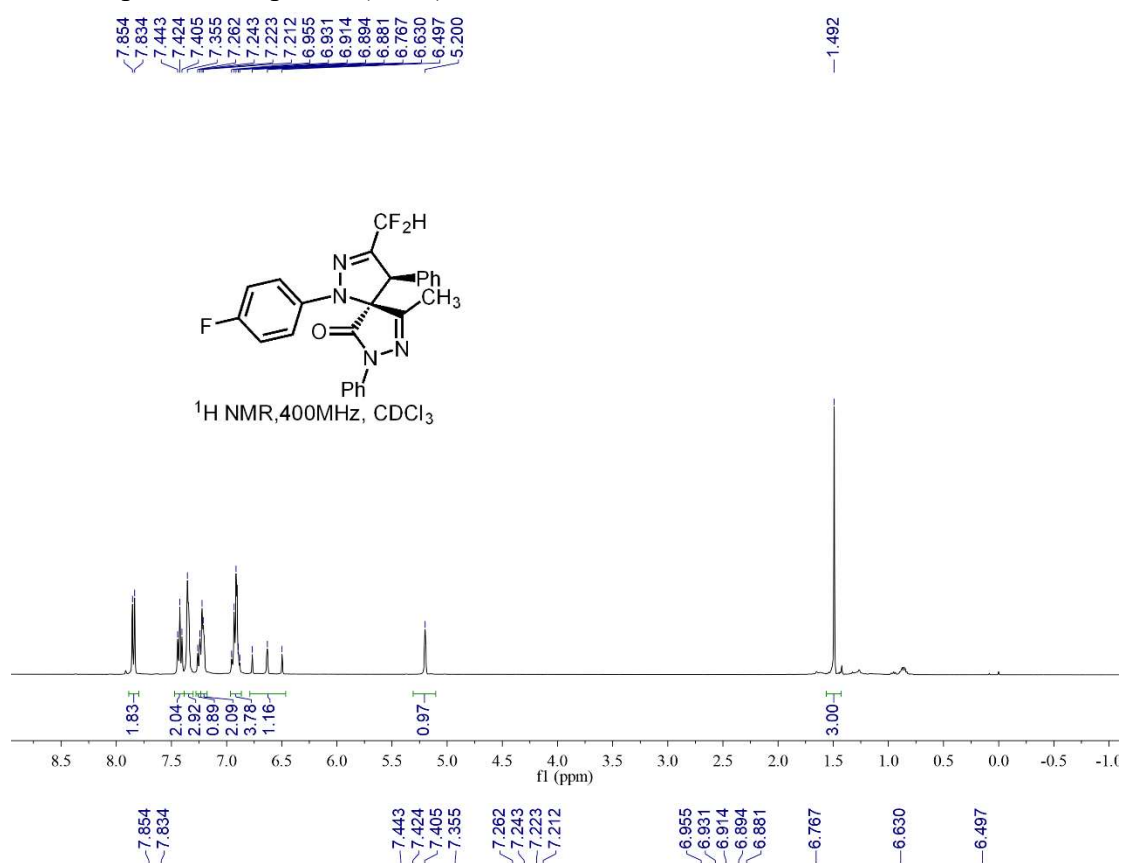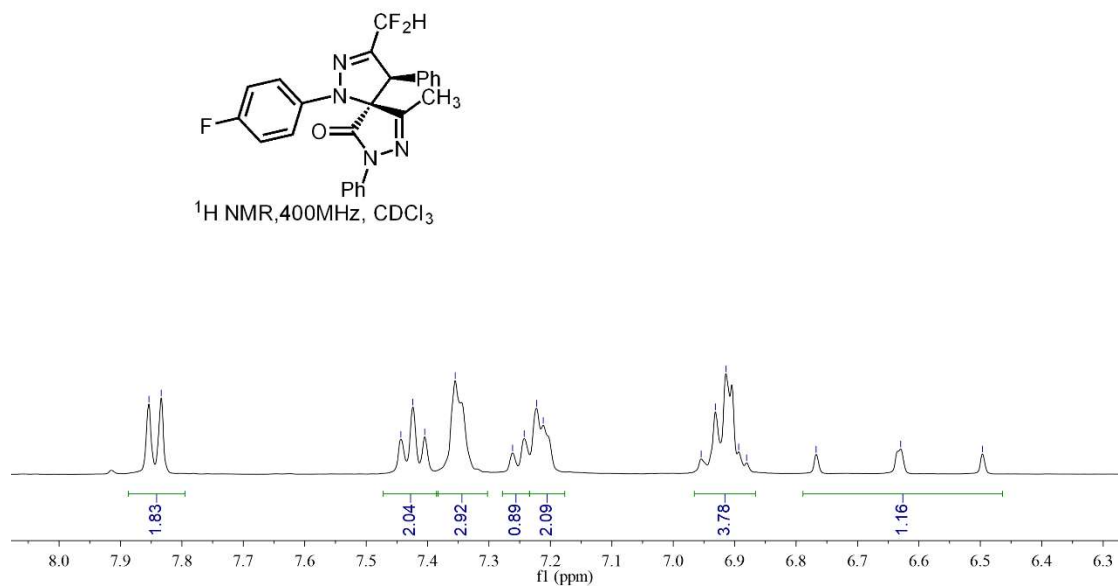

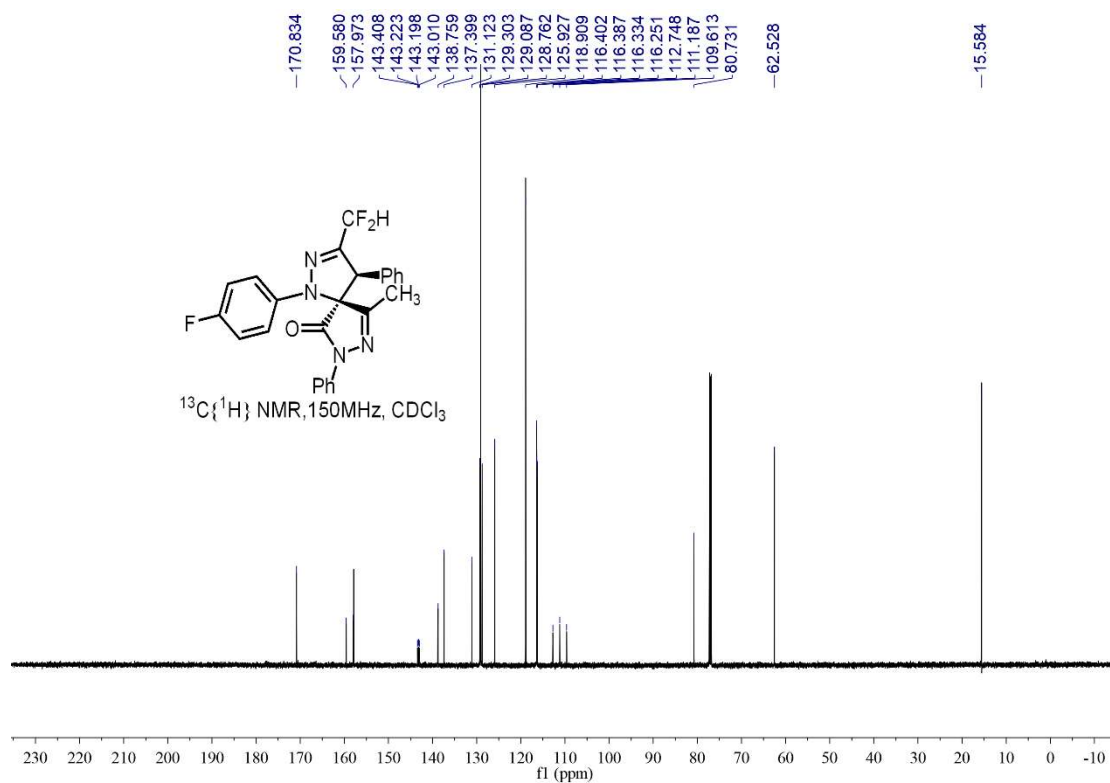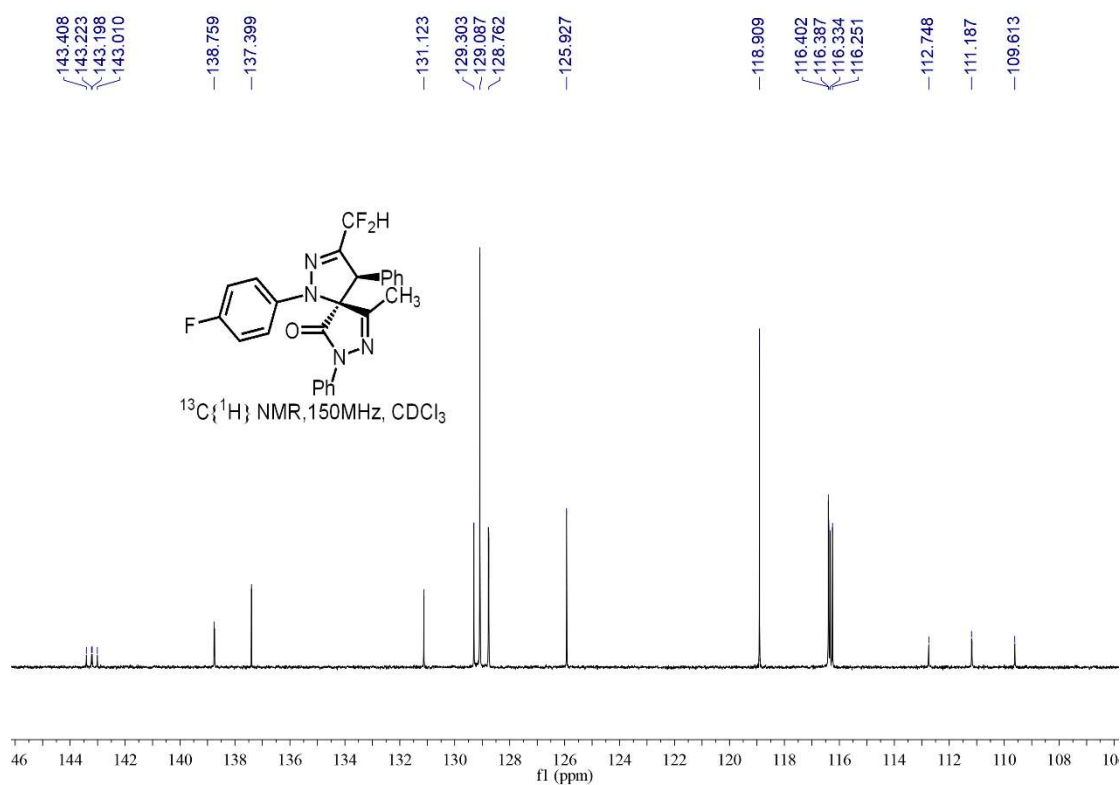

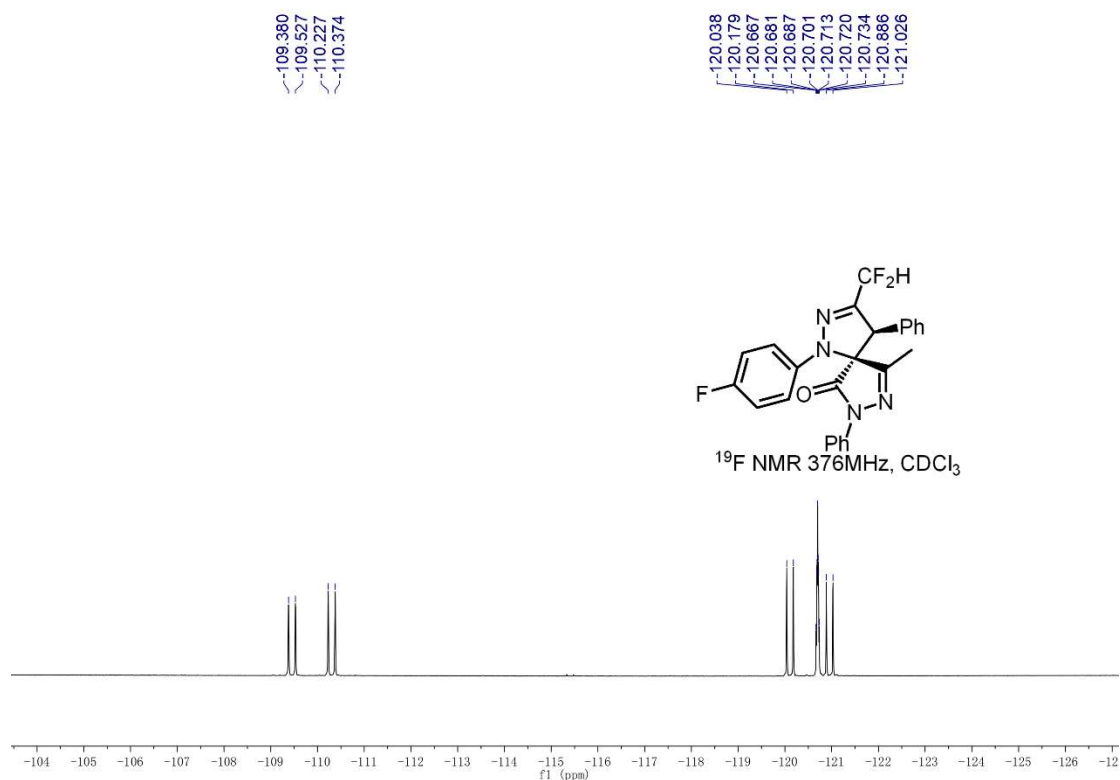

HRMS (ESI) copy of compound (*trans*)-3i:

### Mass Spectrum SmartFormula Report

#### Analysis Info

Analysis Name D:\Data\user\fangyang 20220616-19.d  
 Method tune\_low.m  
 Sample Name A-26  
 Comment

Acquisition Date 2022-6-16 11:09:50

Operator BDAL@DE  
 Instrument / Ser# micrOTOF-Q 20453

#### Acquisition Parameter

|             |          |                       |           |                  |                   |
|-------------|----------|-----------------------|-----------|------------------|-------------------|
| Source Type | ESI      | Ion Polarity          | Positive  | Set Nebulizer    | 0.4 Bar           |
| Focus       | Active   | Set Capillary         | 4500 V    | Set Dry Heater   | 180 $\mu\text{C}$ |
| Scan Begin  | 100 m/z  | Set End Plate Offset  | -500 V    | Set Dry Gas      | 2.0 l/min         |
| Scan End    | 1000 m/z | Set Collision Cell RF | 300.0 Vpp | Set Divert Valve | Waste             |

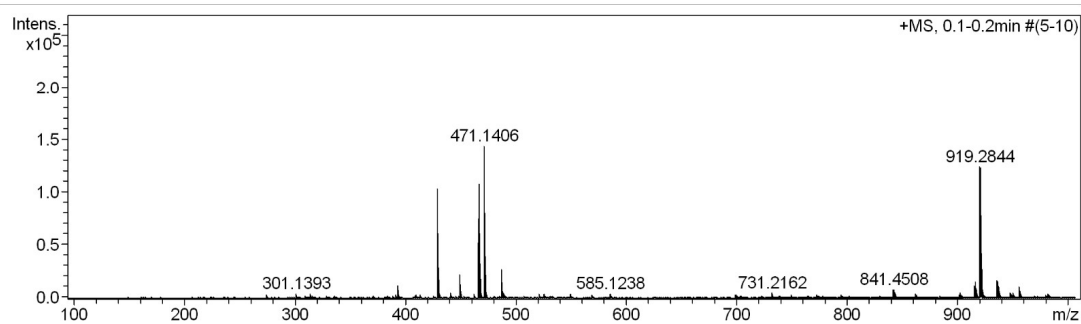

| Meas. #  | Formula                                                             | m/z      | err [ppm] | Me an err [ppm] | rdb  | N-R | e <sub>i</sub> ¥ Conf | mS ig ma | Std l | Std Me an m/z | Std l Va r or m | Std m/ rN Diff | Std Com b Dev |
|----------|---------------------------------------------------------------------|----------|-----------|-----------------|------|-----|-----------------------|----------|-------|---------------|-----------------|----------------|---------------|
| 471.1406 | 1 C <sub>25</sub> H <sub>19</sub> F <sub>3</sub> N <sub>4</sub> NaO | 471.1403 | -0.6      | -1.2            | 16.5 | ok  | even                  | 6.1      | 8.4   | 0.8           | 3.8             | 1.4            | 842.7         |

NMR copies of compound (*cis*)-**3i**:

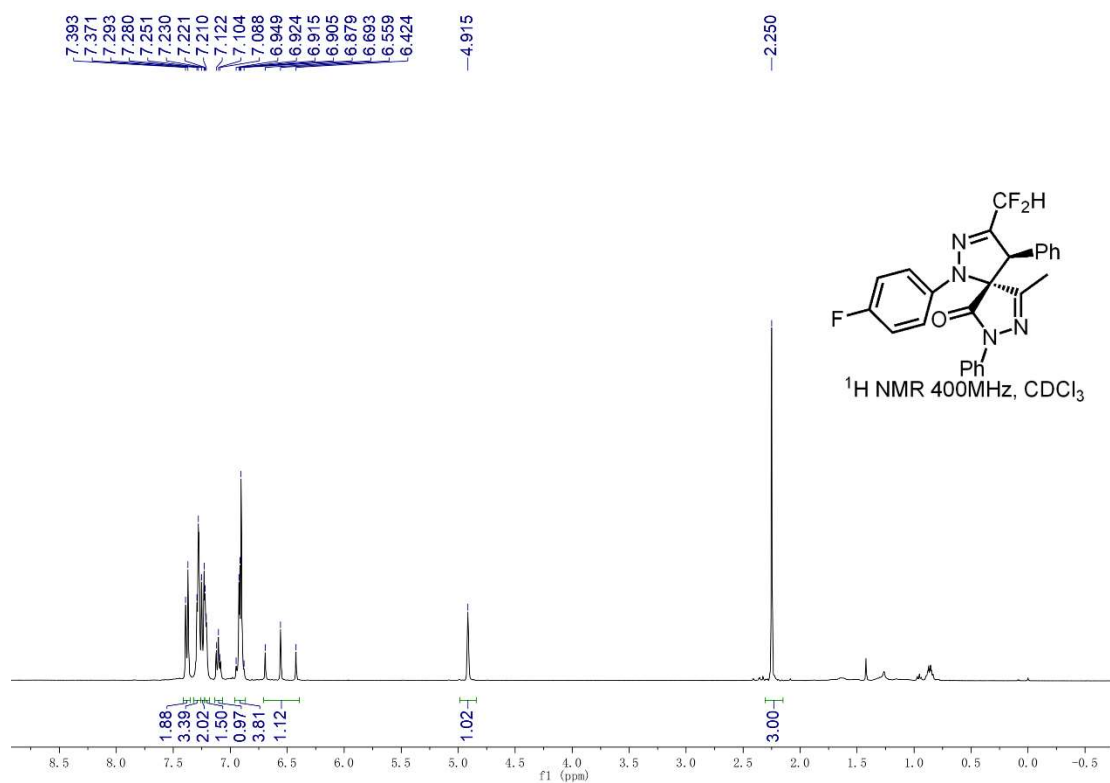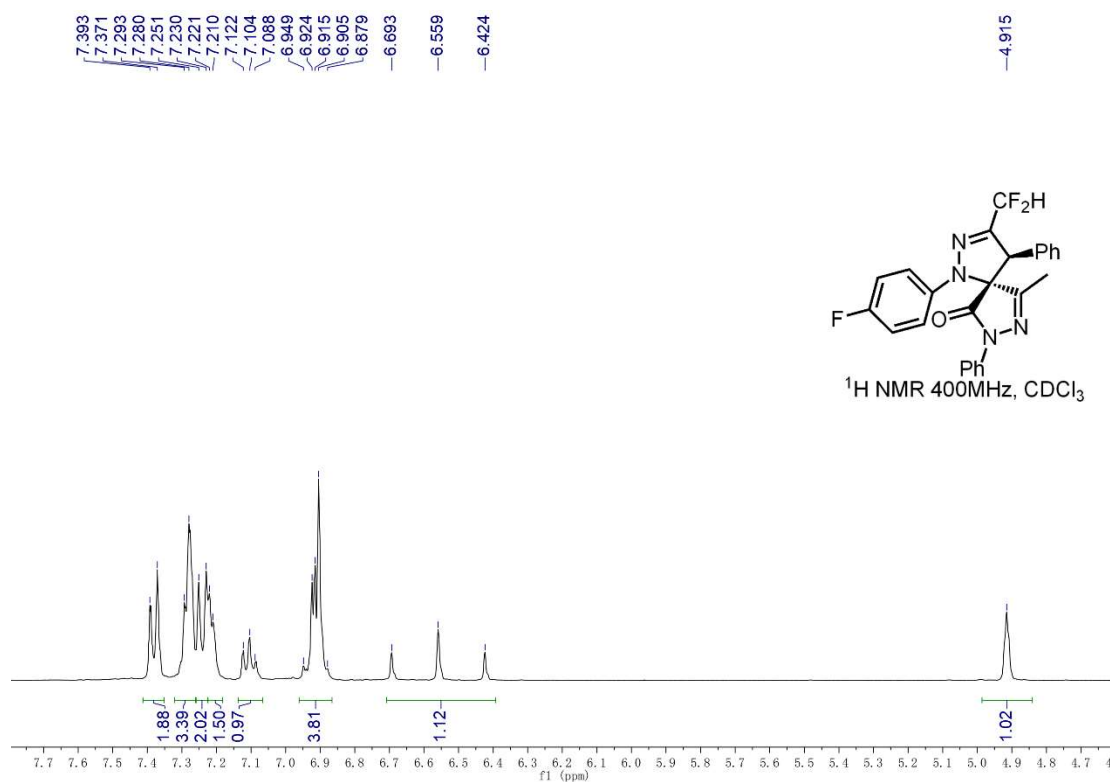

L

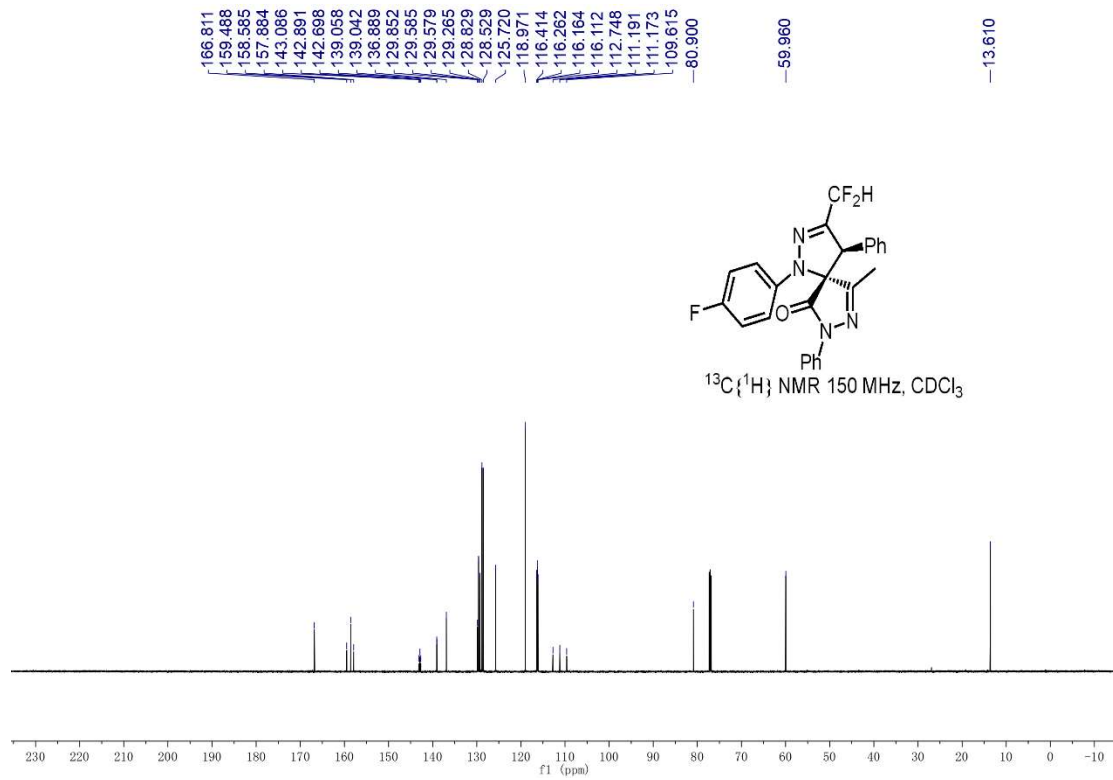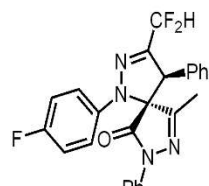

<sup>13</sup>C{<sup>1</sup>H}; NMR 150 MHz, CDCl<sub>3</sub>

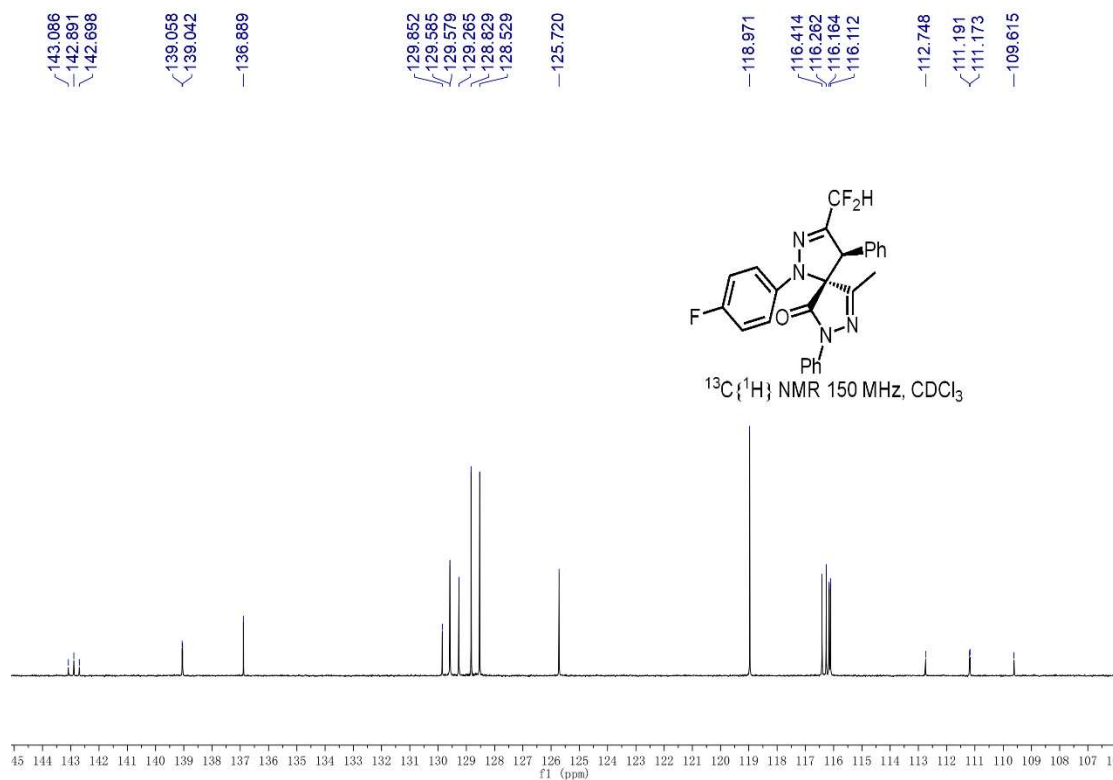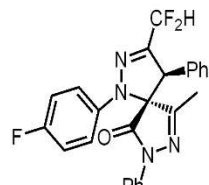

<sup>13</sup>C{<sup>1</sup>H}; NMR 150 MHz, CDCl<sub>3</sub>



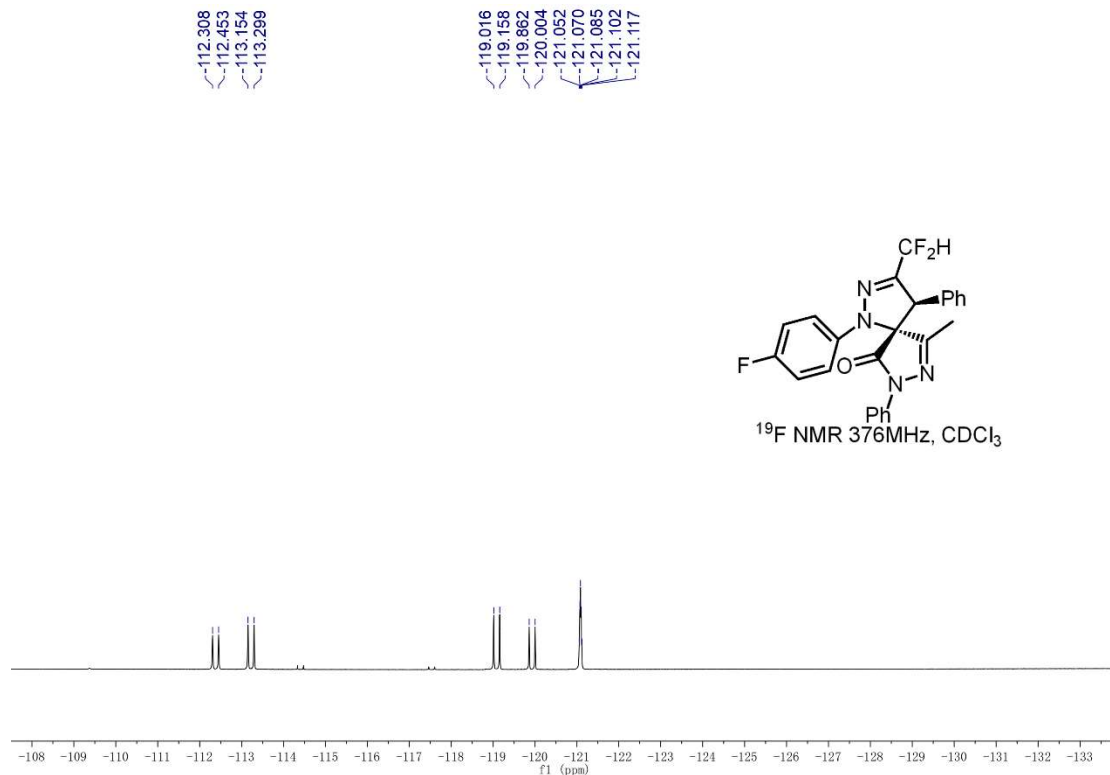

HRMS (ESI) copy of compound (*cis*)-**3i**:

### Mass Spectrum SmartFormula Report

**Analysis Info**

Analysis Name D:\Data\user\fengyang 20220616-20.d  
 Method tune\_low.m  
 Sample Name A-261  
 Comment

Acquisition Date 2022-6-16 11:11:14  
 Operator BDAL@DE  
 Instrument / Ser# micrOTOF-Q 20453

**Acquisition Parameter**

|             |          |                       |           |                  |           |
|-------------|----------|-----------------------|-----------|------------------|-----------|
| Source Type | ESI      | Ion Polarity          | Positive  | Set Nebulizer    | 0.4 Bar   |
| Focus       | Active   | Set Capillary         | 4500 V    | Set Dry Heater   | 180 j°C   |
| Scan Begin  | 100 m/z  | Set End Plate Offset  | -500 V    | Set Dry Gas      | 2.0 l/min |
| Scan End    | 1000 m/z | Set Collision Cell RF | 300.0 Vpp | Set Divert Valve | Waste     |

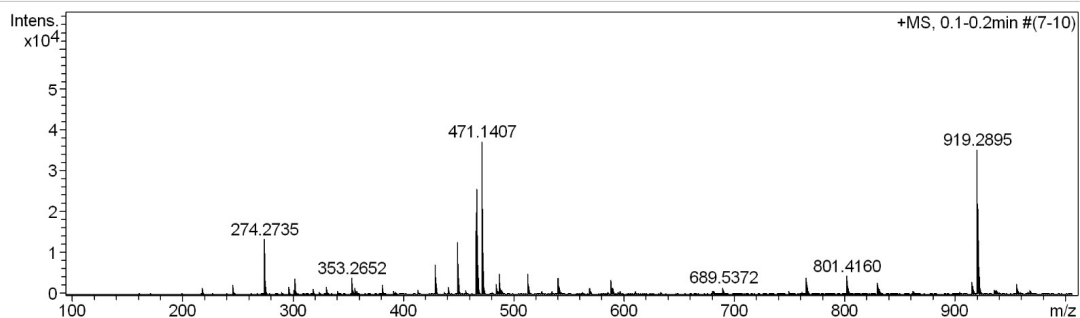

| Meas. #  | Formula                                                             | m/z      | err [ppm] | Me an err [ppm] | rdb  | N-R | ei% Conf | mS  | Std | Std | Std | Std  | Std   |
|----------|---------------------------------------------------------------------|----------|-----------|-----------------|------|-----|----------|-----|-----|-----|-----|------|-------|
| m/z      |                                                                     |          |           |                 |      | ul  |          | ig  | l   | Me  | l   | m/   | Com   |
|          |                                                                     |          |           |                 |      | e   |          | ma  |     | m/  | rN  | Diff | Dev   |
| 471.1407 | 1 C <sub>25</sub> H <sub>19</sub> F <sub>3</sub> N <sub>4</sub> NaO | 471.1403 | -0.9      | -0.9            | 16.5 | ok  | even     | 6.5 | 8.4 | 0.5 | 4.5 | 0.3  | 842.7 |

NMR copies of compound (*trans*)-**3j**:

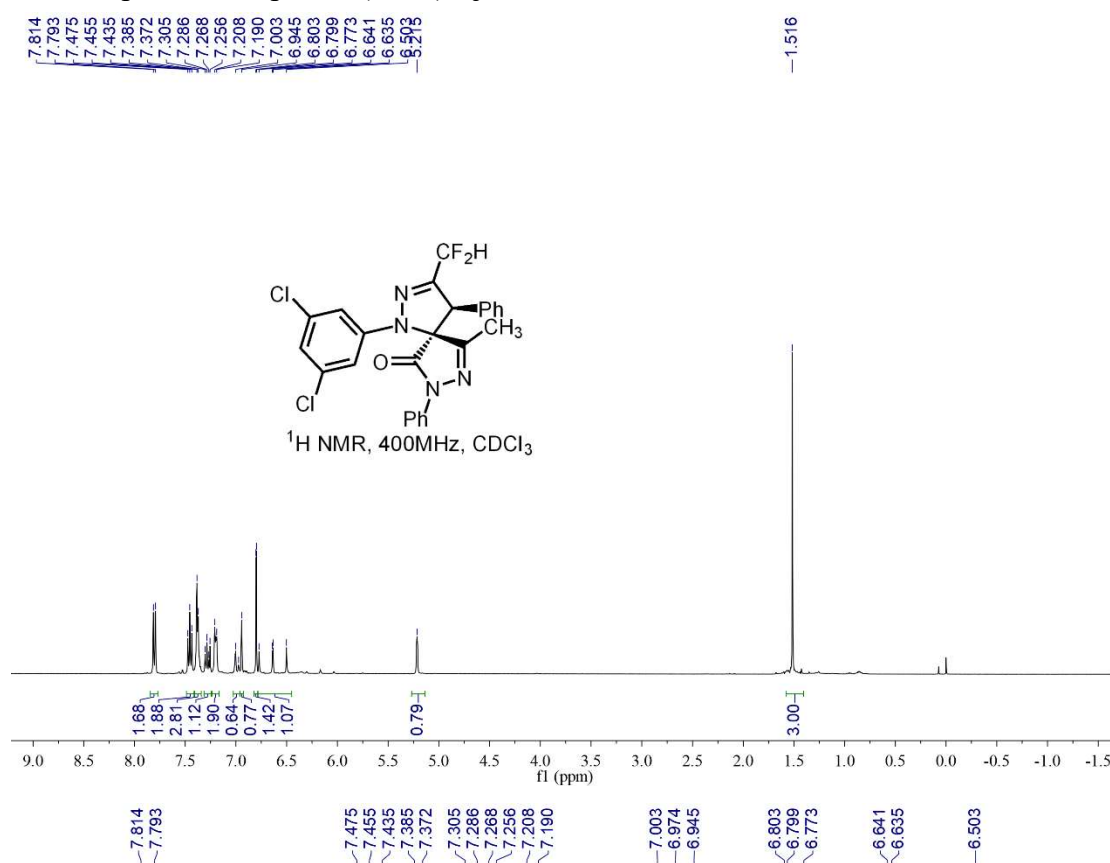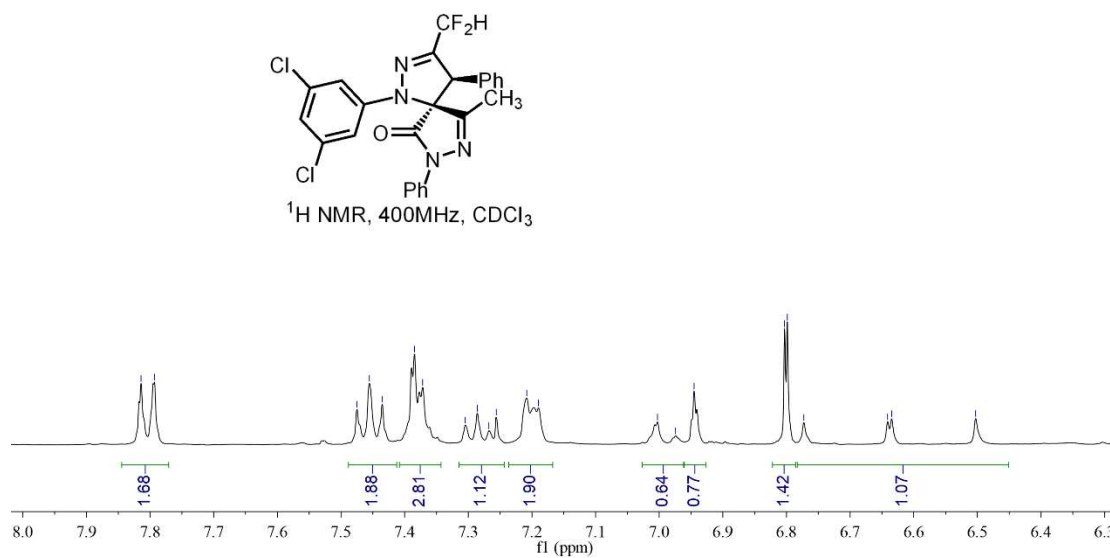

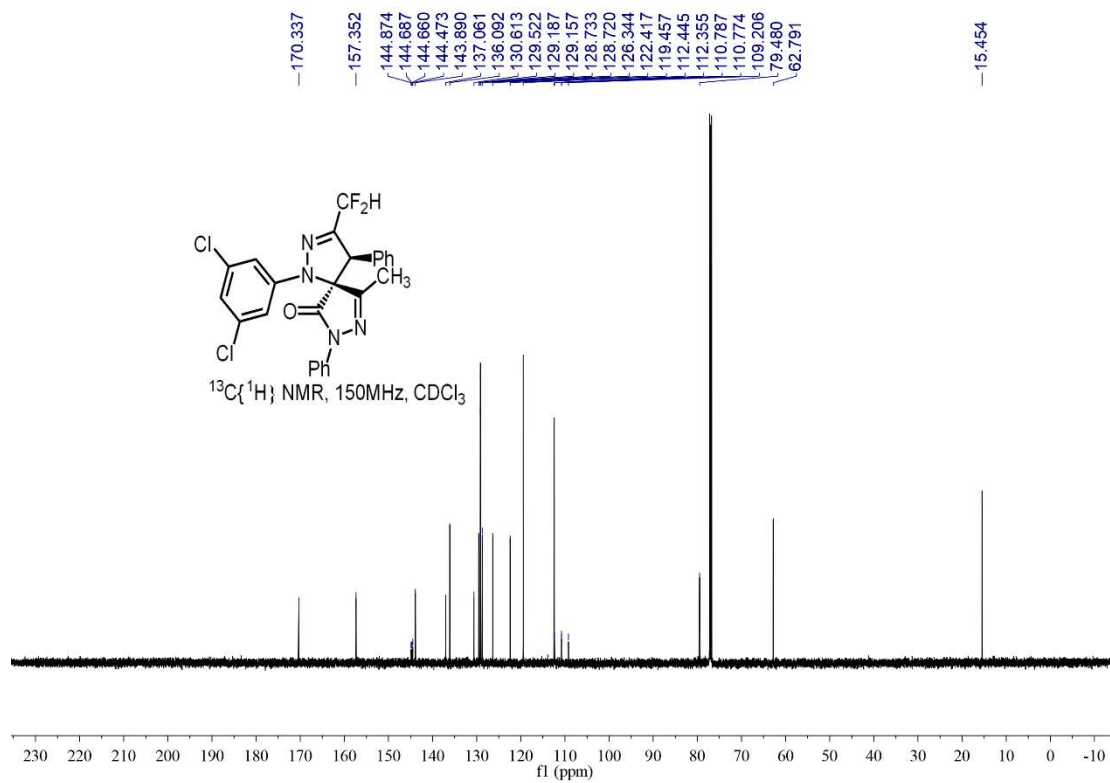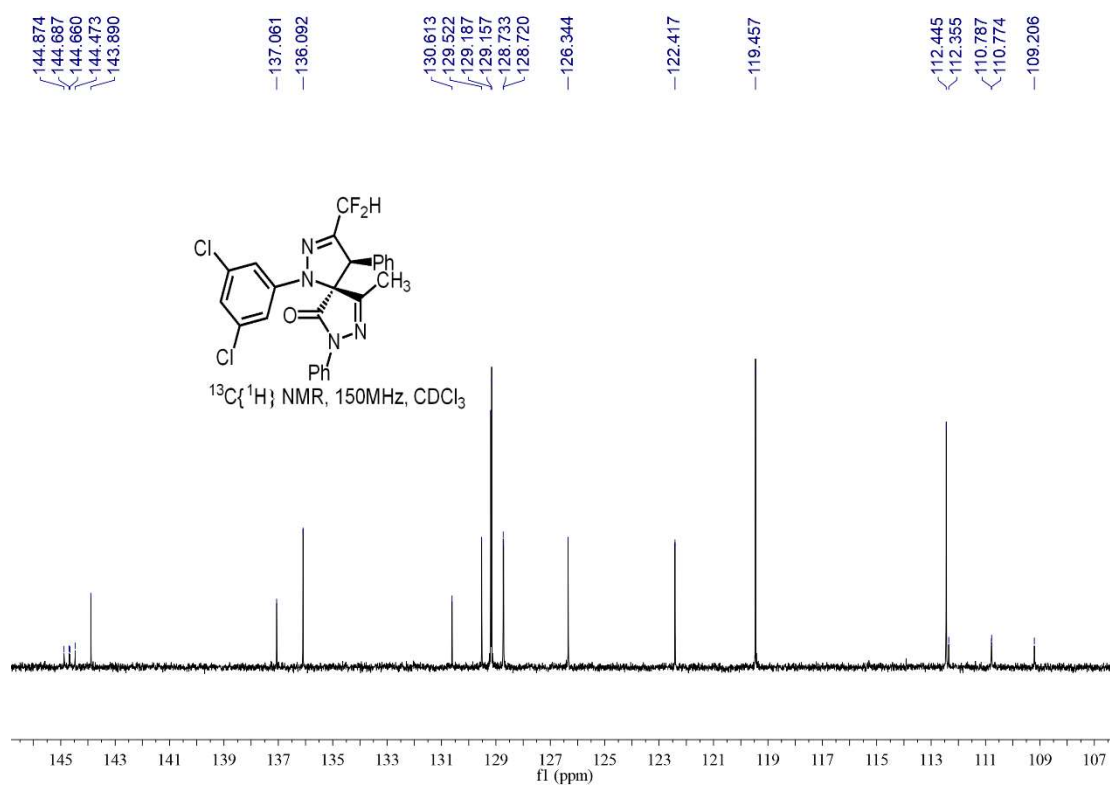

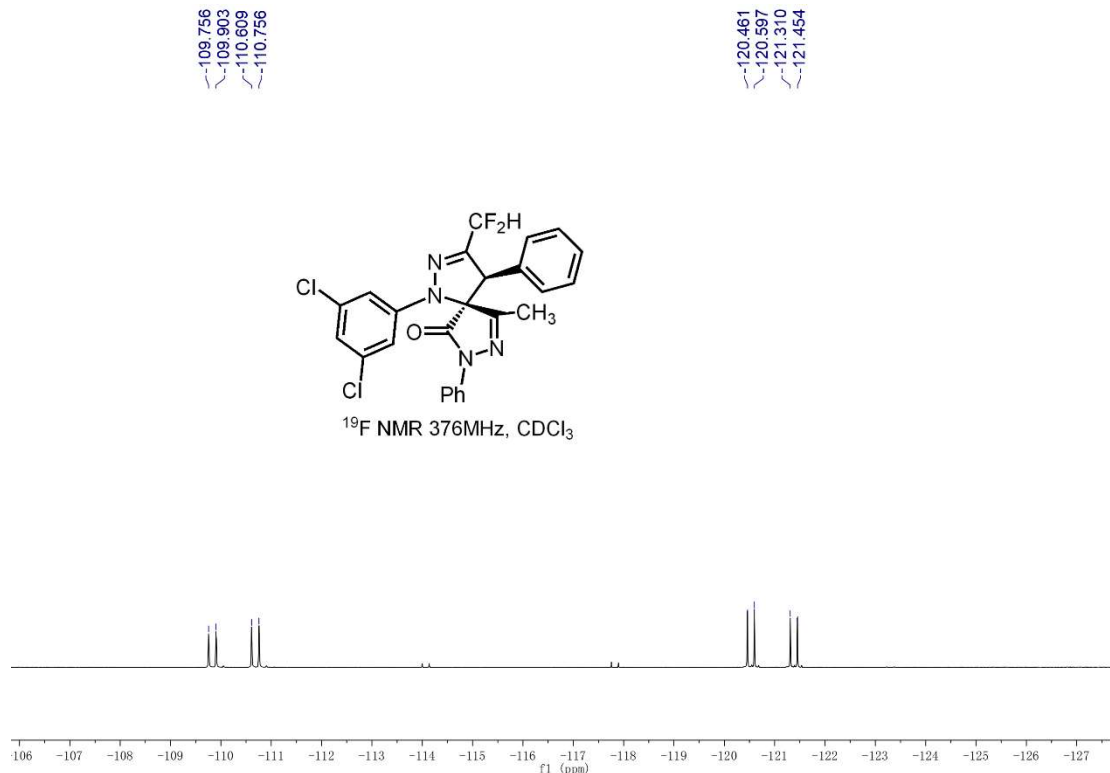

HRMS (ESI) copy of compound (*trans*)-3j:

### Mass Spectrum SmartFormula Report

**Analysis Info**

Analysis Name D:\Data\user\fengyang 20220616-18.d  
 Method tune\_low.m  
 Sample Name A-21  
 Comment

Acquisition Date 2022-6-16 11:06:59  
 Operator BDAL@DE  
 Instrument / Ser# micrOTOF-Q 20453

**Acquisition Parameter**

|             |          |                       |           |                  |           |
|-------------|----------|-----------------------|-----------|------------------|-----------|
| Source Type | ESI      | Ion Polarity          | Positive  | Set Nebulizer    | 0.4 Bar   |
| Focus       | Active   | Set Capillary         | 4500 V    | Set Dry Heater   | 180 j̄aC  |
| Scan Begin  | 100 m/z  | Set End Plate Offset  | -500 V    | Set Dry Gas      | 2.0 l/min |
| Scan End    | 1000 m/z | Set Collision Cell RF | 300.0 Vpp | Set Divert Valve | Waste     |

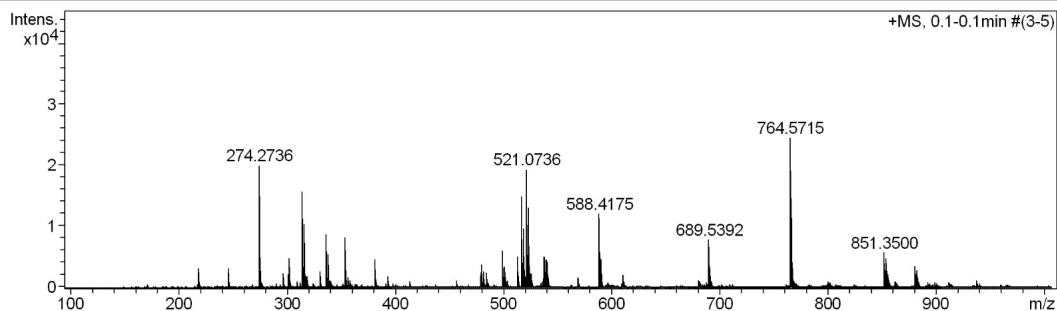

| Meas. #  | Formula                                                                             | m/z      | err [ppm] | Me an err [ppm] | rdb  | N- R ul e | e j % Con | m Si g a | St d l | St d l | St d l | St d l | Std Com b Dev |
|----------|-------------------------------------------------------------------------------------|----------|-----------|-----------------|------|-----------|-----------|----------|--------|--------|--------|--------|---------------|
| 521.0736 | 1 C <sub>25</sub> H <sub>18</sub> Cl <sub>2</sub> F <sub>2</sub> N <sub>4</sub> NaO | 521.0718 | -3.5      | -2.7            | 16.5 | ok        | even      | 6.0      | 6.8    | 1.8    | 2.5    | 2.0    | 842.7         |

NMR copies of compound (*cis*)-**3j**:

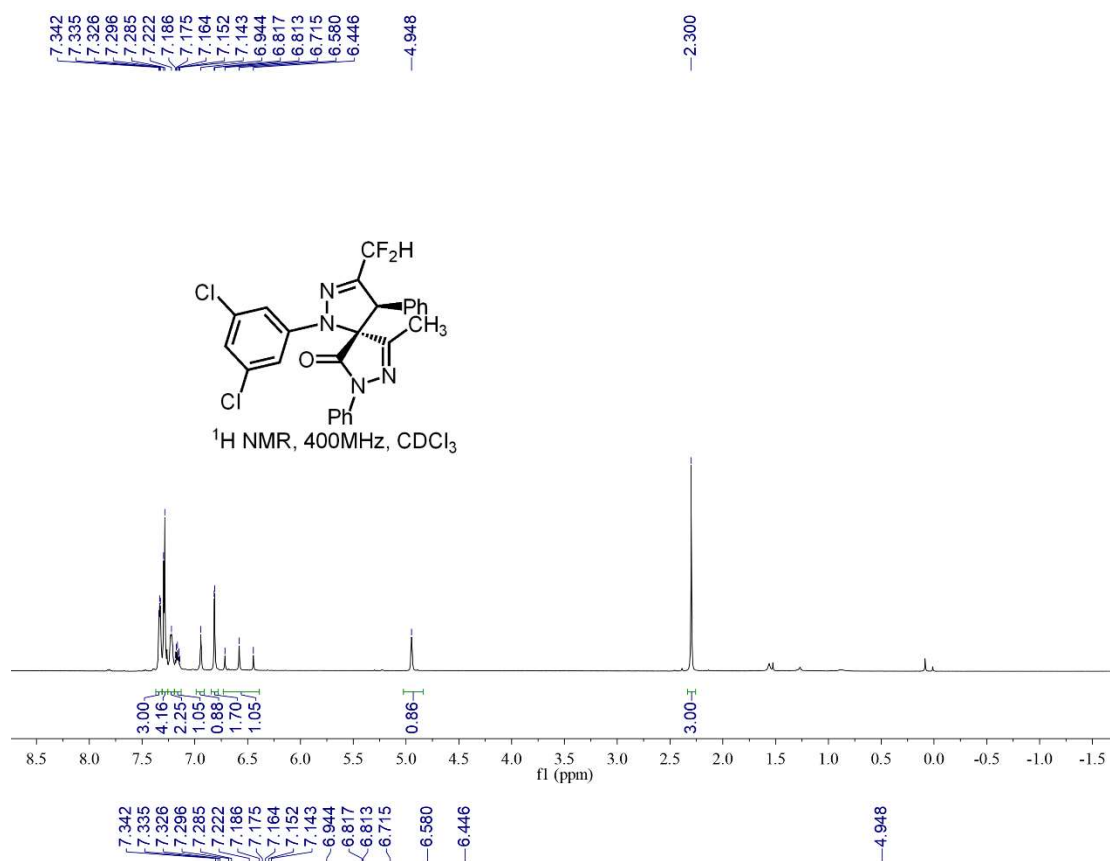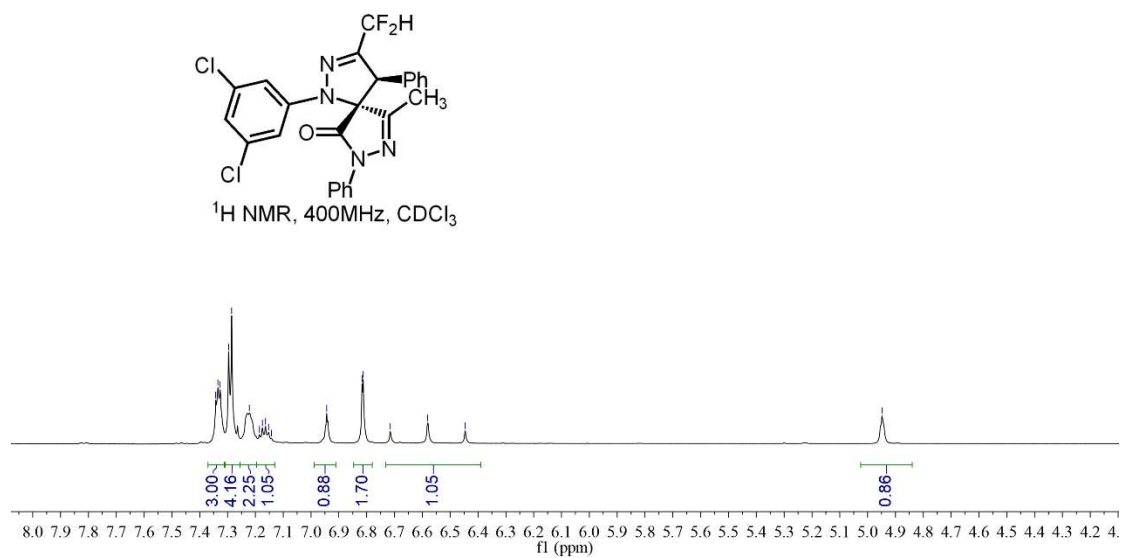

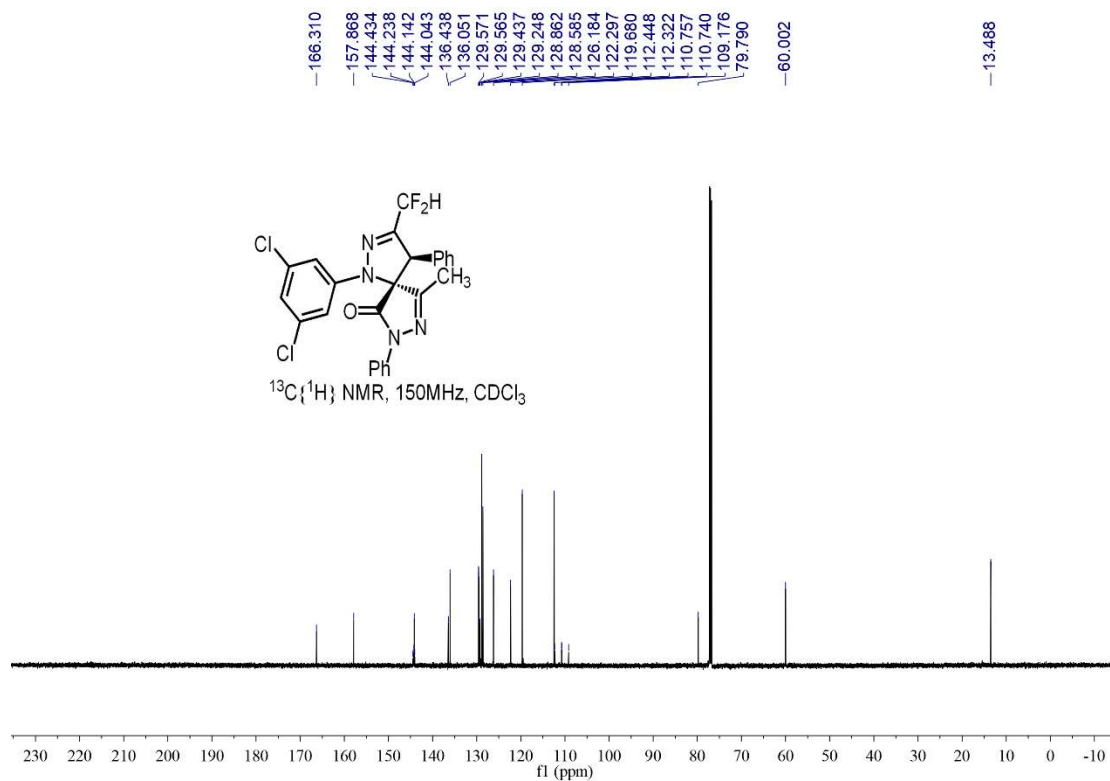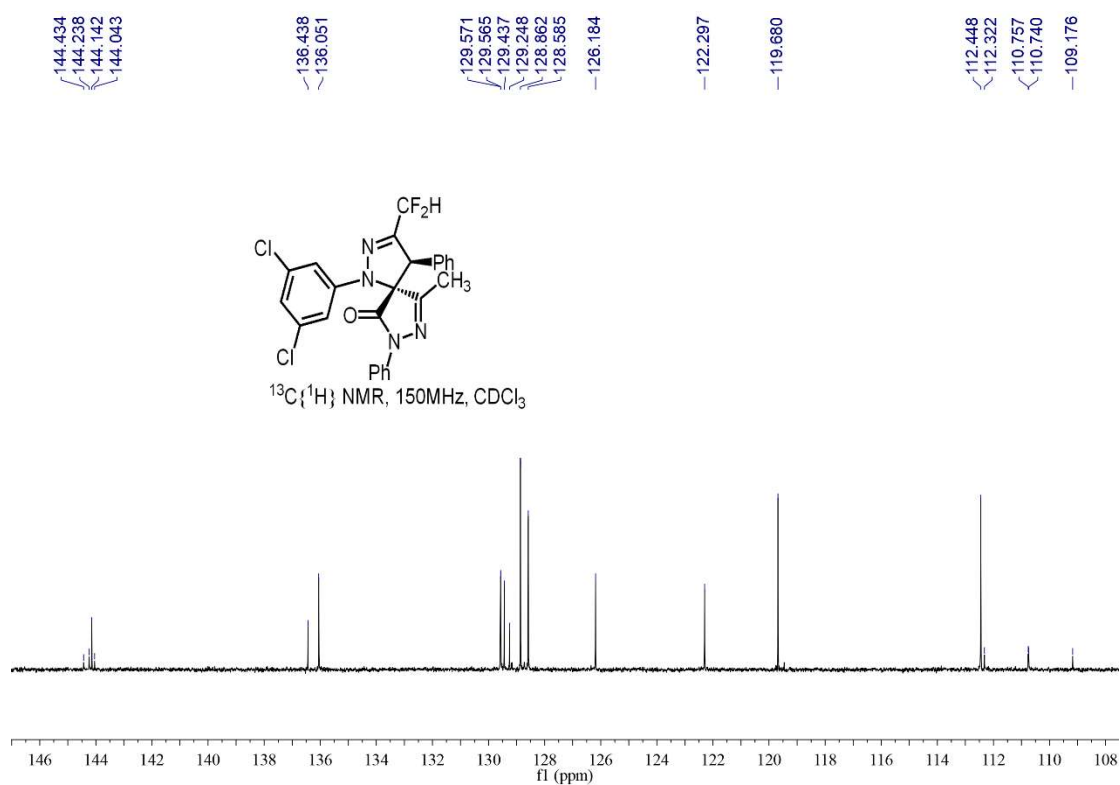

~100.959  
~101.096  
~101.806  
~101.947

~112.651  
~112.796  
~113.502  
~113.646

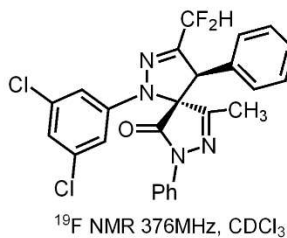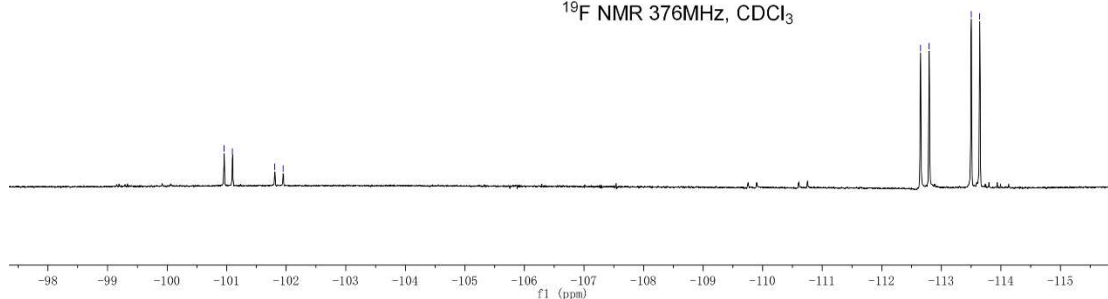

HRMS (ESI) copy of compound (*cis*)-3j:

### Mass Spectrum SmartFormula Report

#### Analysis Info

Analysis Name D:\Data\user\NWNNU-fengyang 20220707-13.d  
Method tune\_low.m  
Sample Name A-211  
Comment

Acquisition Date 2022-7-7 11:41:25

Operator BDAL@DE  
Instrument / Ser# micrOTOF-Q 20453

#### Acquisition Parameter

|             |          |                       |           |                  |           |
|-------------|----------|-----------------------|-----------|------------------|-----------|
| Source Type | ESI      | Ion Polarity          | Positive  | Set Nebulizer    | 0.4 Bar   |
| Focus       | Active   | Set Capillary         | 4500 V    | Set Dry Heater   | 180 j̄C   |
| Scan Begin  | 100 m/z  | Set End Plate Offset  | -500 V    | Set Dry Gas      | 4.0 l/min |
| Scan End    | 1000 m/z | Set Collision Cell RF | 500.0 Vpp | Set Divert Valve | Waste     |

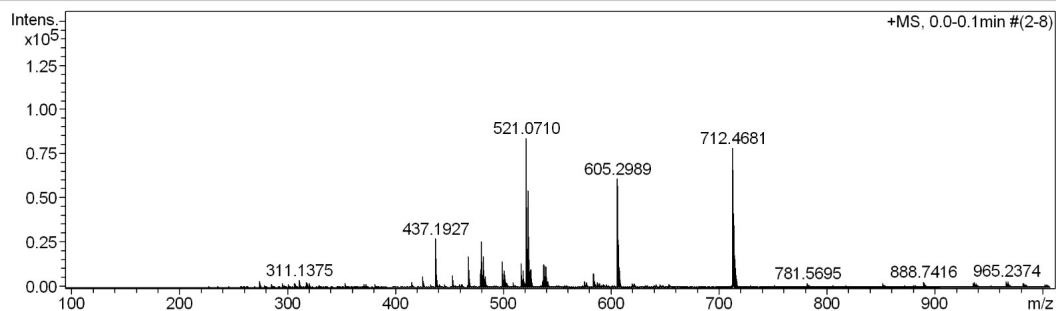

| Meas. #  | Formula | m/z                         | err      | M   | rdb | N-   | e   | mSi  | Std  | St   | St  | St  | Std |       |
|----------|---------|-----------------------------|----------|-----|-----|------|-----|------|------|------|-----|-----|-----|-------|
| m/z      |         |                             | [p       | ea  |     | R    | Con | gm   | l    | d    | d   | d   | Com |       |
|          |         |                             | p        | n   |     | ul   | f   | a    |      | M    | Va  | m/  | b   |       |
|          |         |                             | m]       | err |     | e    |     |      |      | ea   | rN  | z   | Dev |       |
|          |         |                             |          | [p  |     |      |     |      |      | n    | or  | Dif |     |       |
|          |         |                             |          | p   |     |      |     |      |      | m/   | m/  | f   |     |       |
|          |         |                             |          | m]  |     |      |     |      |      | z    |     |     |     |       |
| 521.0710 | 1       | C 25 H 18 Cl 2 F 2 N 4 Na O | 521.0718 | 1.6 | 1.0 | 16.5 | ok  | even | 16.7 | 17.4 | 1.3 | 4.4 | 2.1 | 842.7 |

NMR copies of compound (*trans*)-3k:

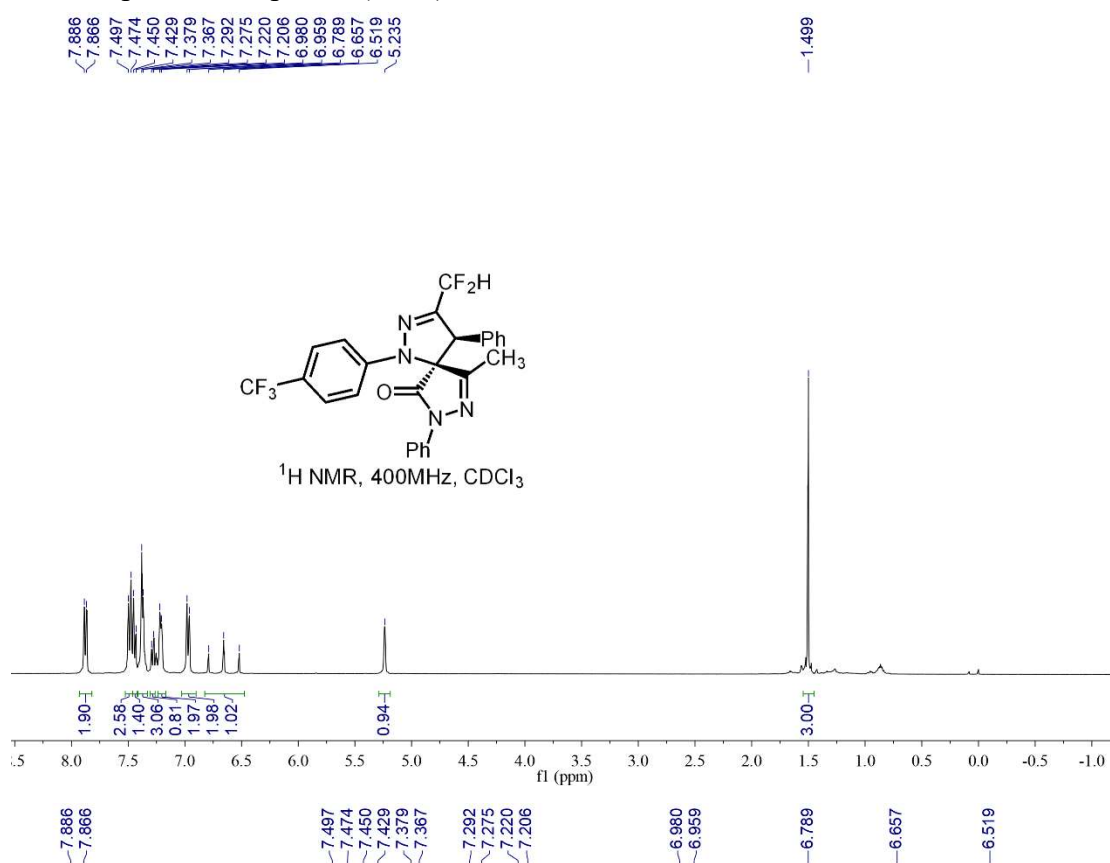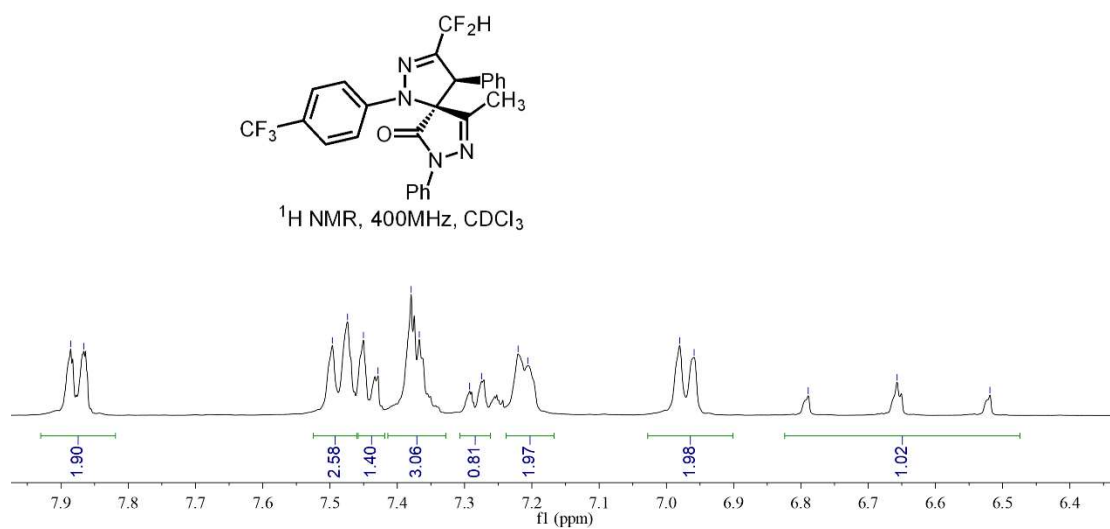



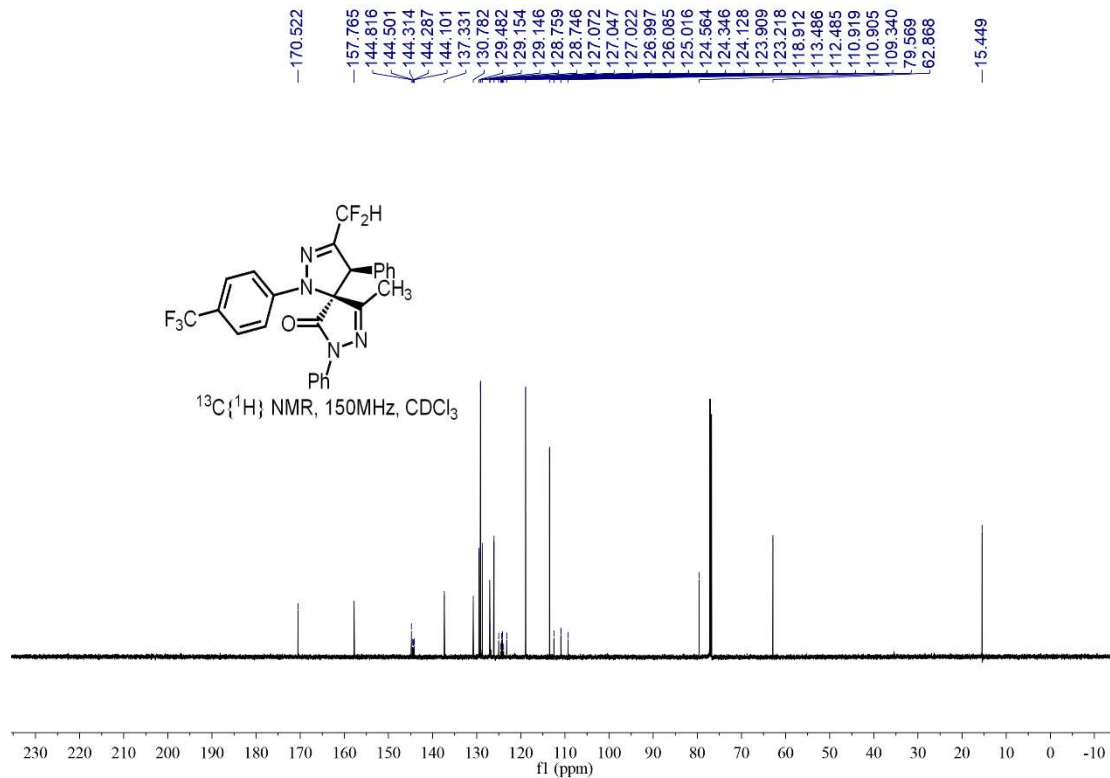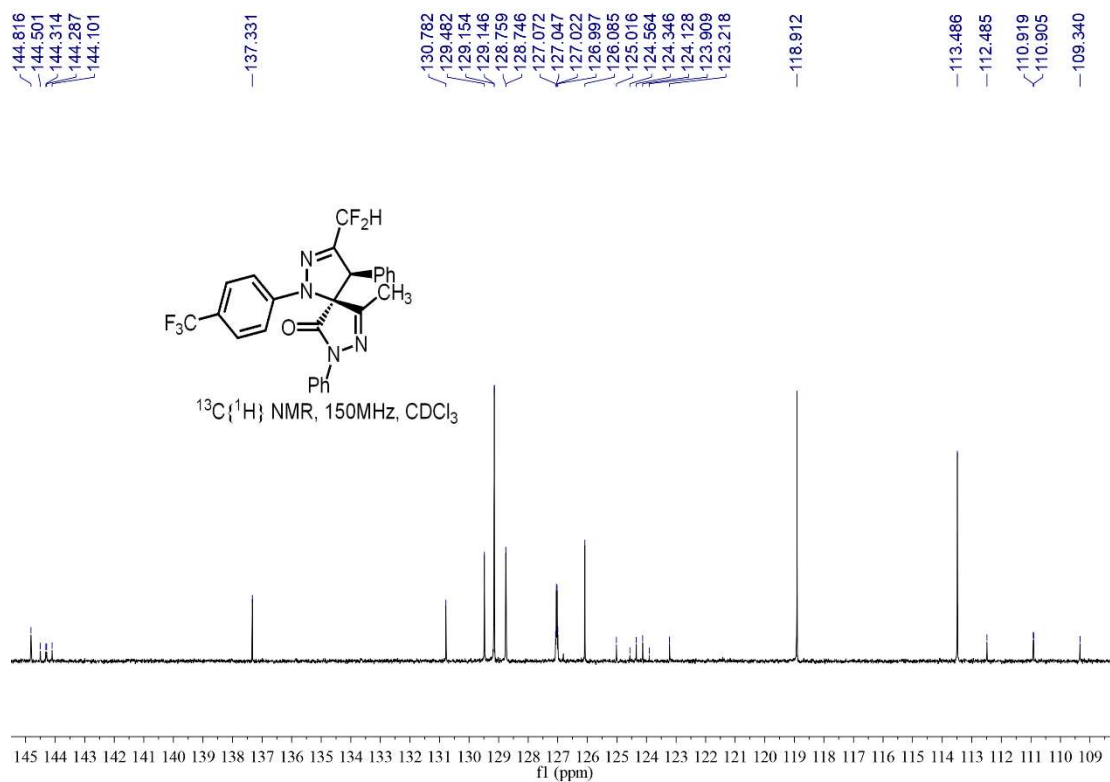

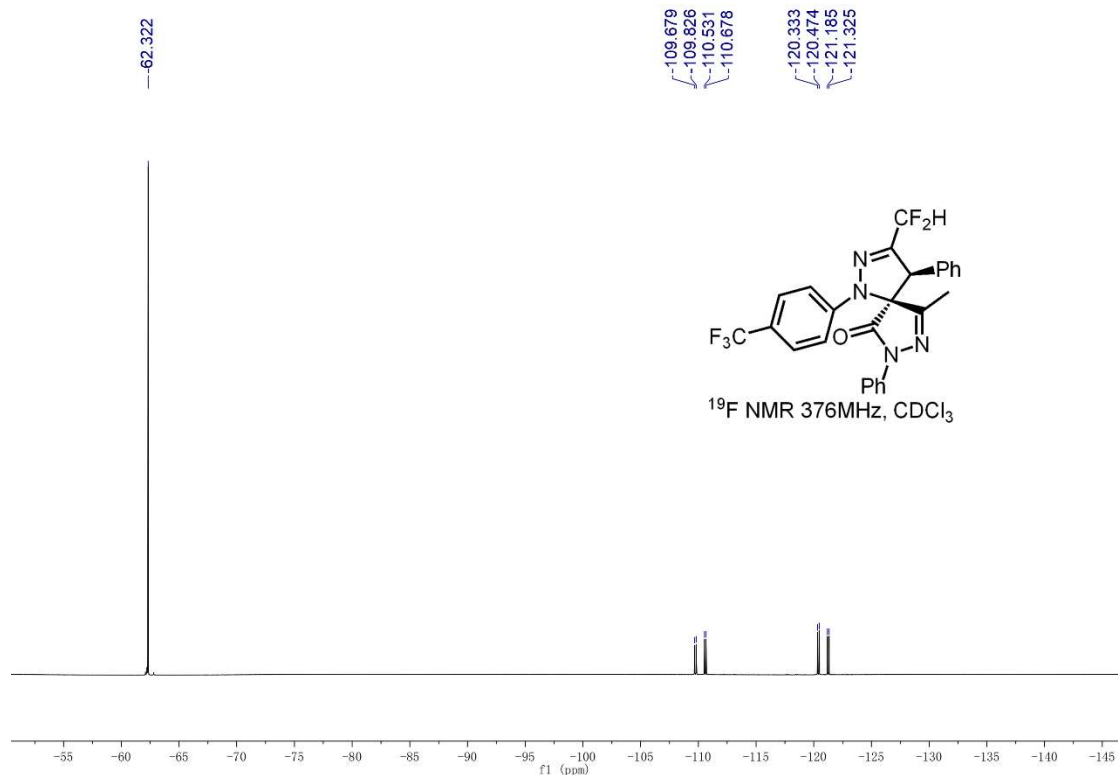

HRMS (ESI) copy of compound (*trans*)-3k:

### Mass Spectrum SmartFormula Report

**Analysis Info**

Analysis Name D:\Data\user\fengyang 20220616-14.d  
 Method tune\_low.m  
 Sample Name A-15  
 Comment

Acquisition Date 2022-6-16 10:54:39  
 Operator BDAL@DE  
 Instrument / Ser# micrOTOF-Q 20453

**Acquisition Parameter**

|             |          |                       |           |                  |                     |
|-------------|----------|-----------------------|-----------|------------------|---------------------|
| Source Type | ESI      | Ion Polarity          | Positive  | Set Nebulizer    | 0.4 Bar             |
| Focus       | Active   | Set Capillary         | 4500 V    | Set Dry Heater   | 180 $\mu\text{A}$ C |
| Scan Begin  | 100 m/z  | Set End Plate Offset  | -500 V    | Set Dry Gas      | 2.0 l/min           |
| Scan End    | 1000 m/z | Set Collision Cell RF | 300.0 Vpp | Set Divert Valve | Waste               |

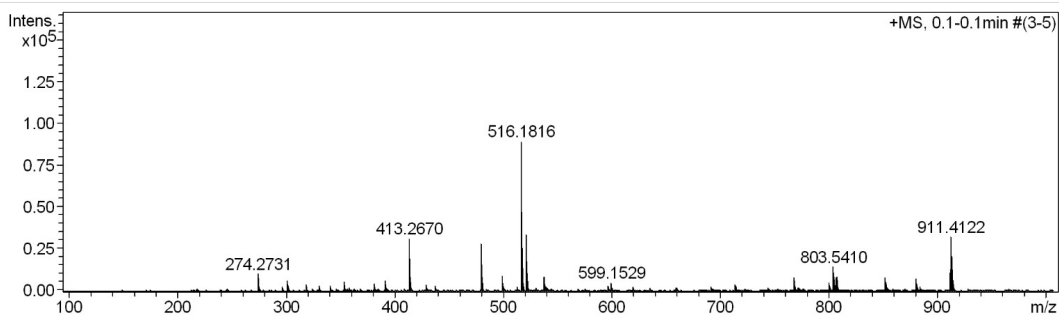

| Meas. #  | Formula                                                                                        | m/z      | err [ppm] | Me an err [ppm] | rdb  | N  | e <sub>i</sub> % | mSi gm | Std l | St d m/z | Std Var m | Std Nor m | Std Dif f | Std Com b Dev |
|----------|------------------------------------------------------------------------------------------------|----------|-----------|-----------------|------|----|------------------|--------|-------|----------|-----------|-----------|-----------|---------------|
| 516.1816 | 1 C <sub>26</sub> H <sub>25</sub> F <sub>2</sub> N <sub>5</sub> NaO <sub>3</sub>               | 516.1818 | 0.3       | 0.8             | 15.5 | ok | even             | 7.2    | 10.3  | 0.7      | 4.5       | 1.2       | 646.6     |               |
|          | 2 C <sub>23</sub> H <sub>26</sub> F <sub>3</sub> N <sub>5</sub> NaO <sub>4</sub>               | 516.1829 | 2.5       | 3.0             | 11.5 | ok | even             | 12.1   | 19.0  | 1.6      | 8.3       | 1.2       | 833.3     |               |
|          | 3 C <sub>21</sub> H <sub>27</sub> F <sub>3</sub> N <sub>5</sub> Na <sub>2</sub> O <sub>4</sub> | 516.1805 | -2.1      | -1.7            | 8.5  | ok | even             | 24.9   | 39.7  | 1.0      | 17.0      | 1.2       | 839.3     |               |
|          | 4 C <sub>19</sub> H <sub>22</sub> F <sub>3</sub> N <sub>11</sub> NaO <sub>2</sub>              | 516.1802 | -2.7      | -2.2            | 12.5 | ok | even             | 25.5   | 41.9  | 1.3      | 18.2      | 1.1       | 868.6     |               |
|          | 5 C <sub>21</sub> H <sub>25</sub> F <sub>6</sub> N <sub>5</sub> NaO <sub>2</sub>               | 516.1805 | -2.2      | -1.7            | 8.5  | ok | even             | 25.7   | 42.0  | 1.0      | 18.2      | 1.2       | 849.5     |               |
|          | 6 C <sub>19</sub> H <sub>24</sub> F <sub>4</sub> N <sub>9</sub> Na <sub>2</sub> O              | 516.1830 | 2.7       | 3.1             | 9.5  | ok | even             | 30.7   | 51.5  | 1.7      | 22.3      | 1.2       | 913.1     |               |
| 521.1371 | 1 C <sub>26</sub> H <sub>19</sub> F <sub>5</sub> N <sub>4</sub> NaO                            | 521.1371 | 0.1       | -0.1            | 16.5 | ok | even             | 8.5    | 13.5  | 0.2      | 6.3       | 0.4       | 842.7     |               |

NMR copies of compound (*cis*)-**3k**:

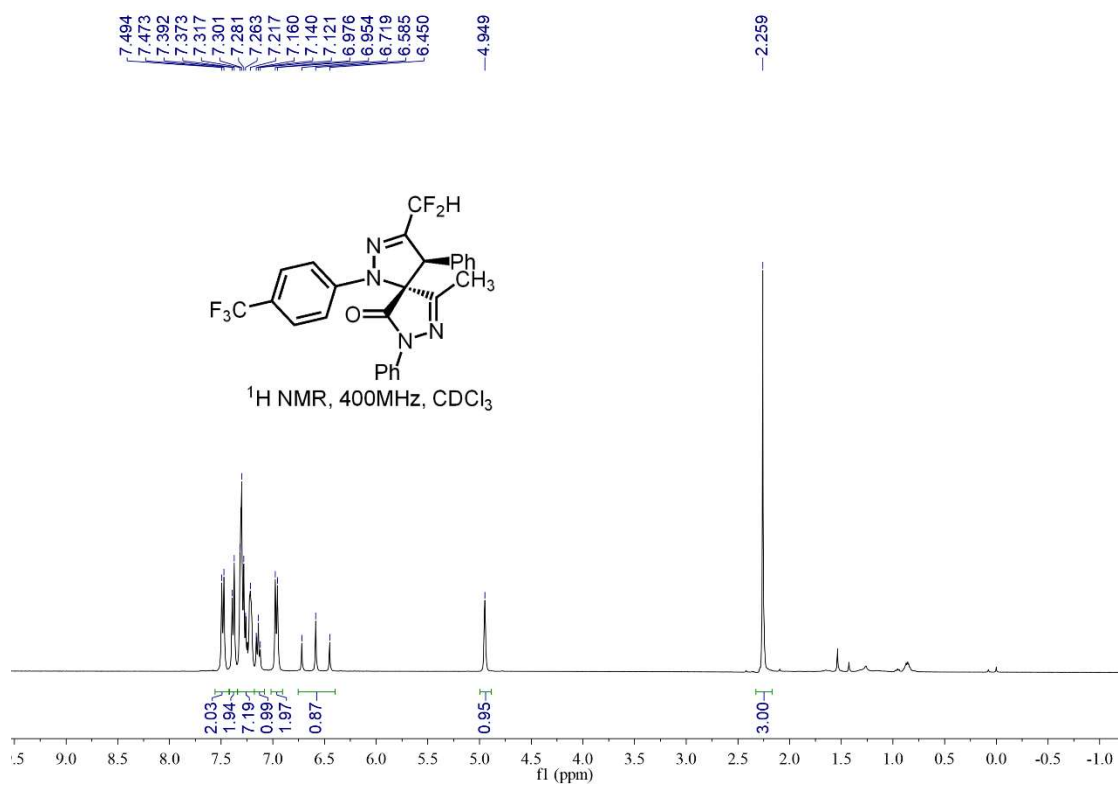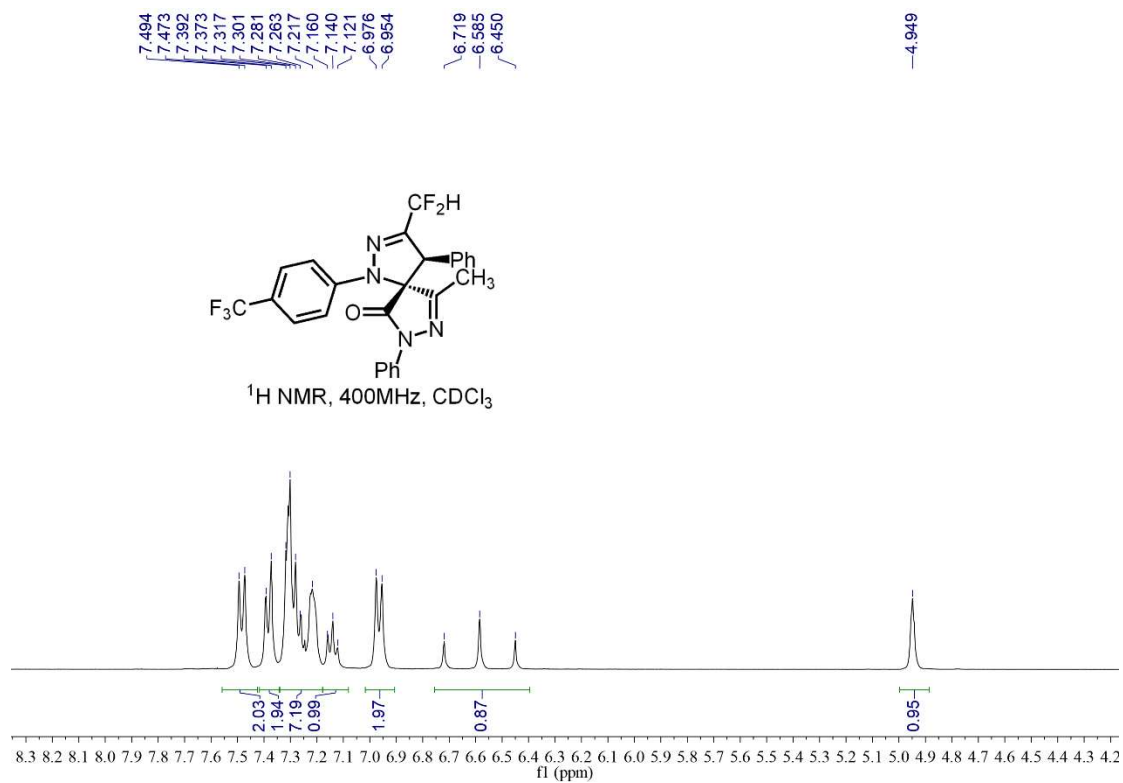

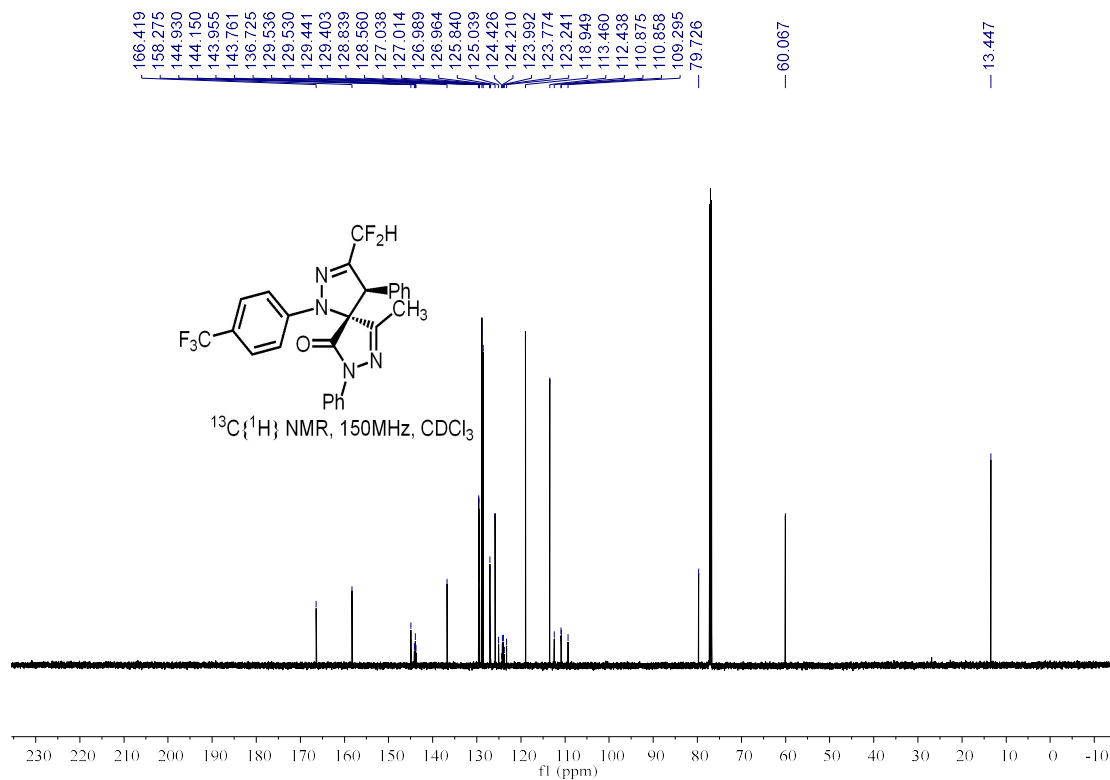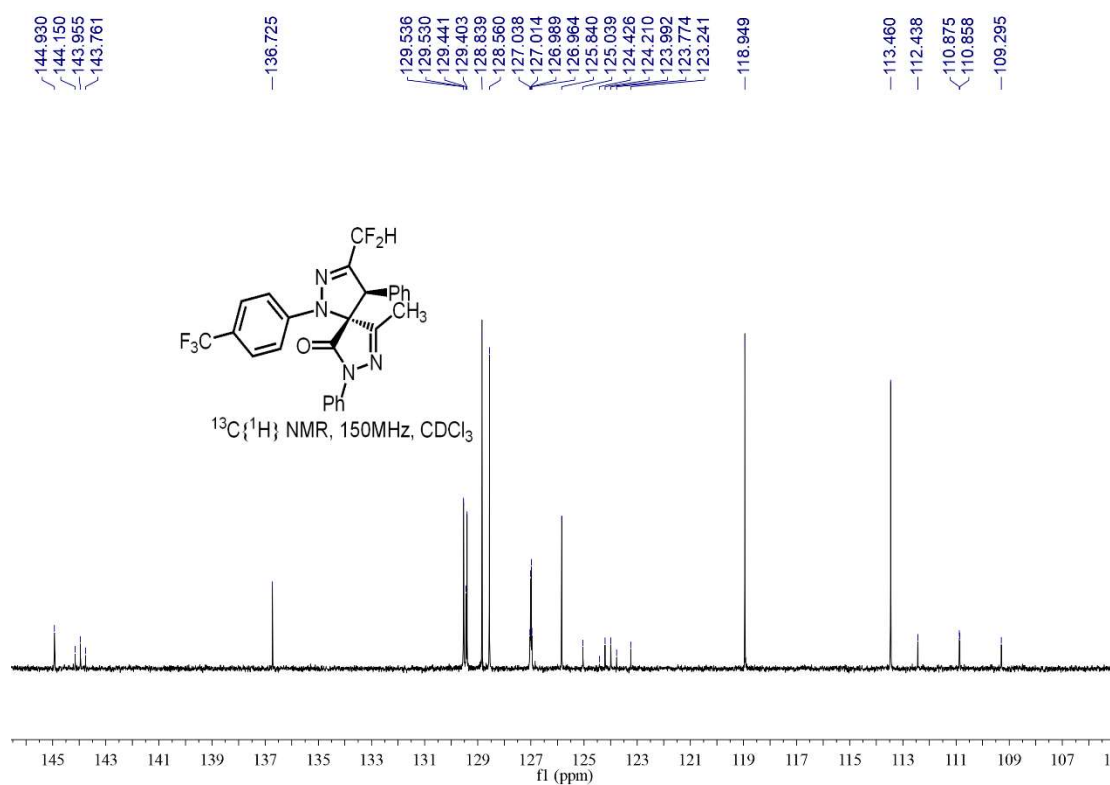

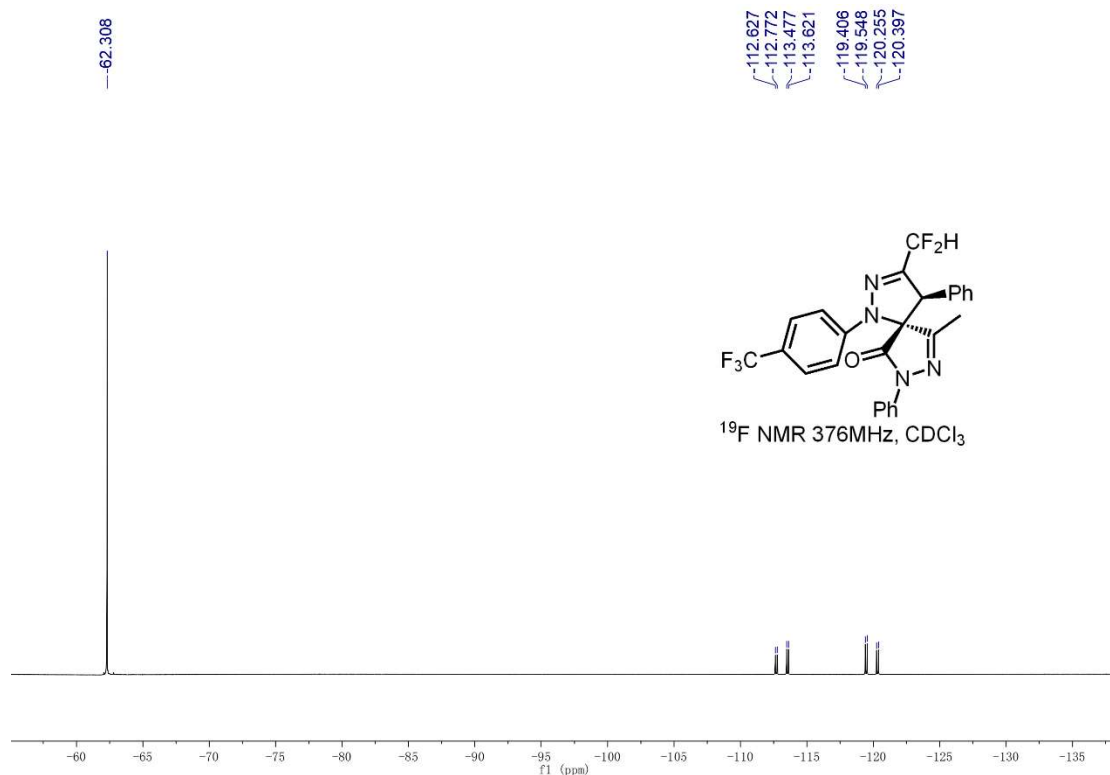

HRMS (ESI) copy of compound (*cis*)-3k:

### Mass Spectrum SmartFormula Report

#### Analysis Info

Analysis Name D:\Data\user\fengyang 20220616-15.d  
 Method tune\_low.m  
 Sample Name A-151  
 Comment

Acquisition Date 2022-6-16 10:56:48  
 Operator BDAL@DE  
 Instrument / Ser# micrOTOF-Q 20453

#### Acquisition Parameter

|             |          |                       |           |                  |                   |
|-------------|----------|-----------------------|-----------|------------------|-------------------|
| Source Type | ESI      | Ion Polarity          | Positive  | Set Nebulizer    | 0.4 Bar           |
| Focus       | Active   | Set Capillary         | 4500 V    | Set Dry Heater   | 180 $\mu\text{C}$ |
| Scan Begin  | 100 m/z  | Set End Plate Offset  | -500 V    | Set Dry Gas      | 2.0 l/min         |
| Scan End    | 1000 m/z | Set Collision Cell RF | 300.0 Vpp | Set Divert Valve | Waste             |

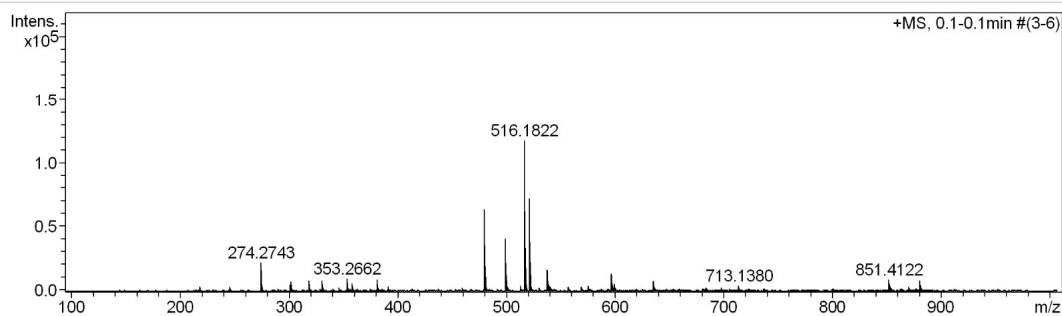

| Meas. #  | Formula                                                             | m/z      | err [ppm] | Me an err [ppm] | rdb  | N- R | ei % Conf | mSi gm | Std l | St d | St d l | St d | Std Com b |
|----------|---------------------------------------------------------------------|----------|-----------|-----------------|------|------|-----------|--------|-------|------|--------|------|-----------|
| 521.1379 | 1 C <sub>26</sub> H <sub>19</sub> F <sub>5</sub> N <sub>4</sub> NaO | 521.1371 | -1.5      | -1.4            | 16.5 | ok   | even      | 10.2   | 14.9  | 0.7  | 6.4    | 0.2  | 842.7     |

NMR copies of compound (*trans*)-**31**:

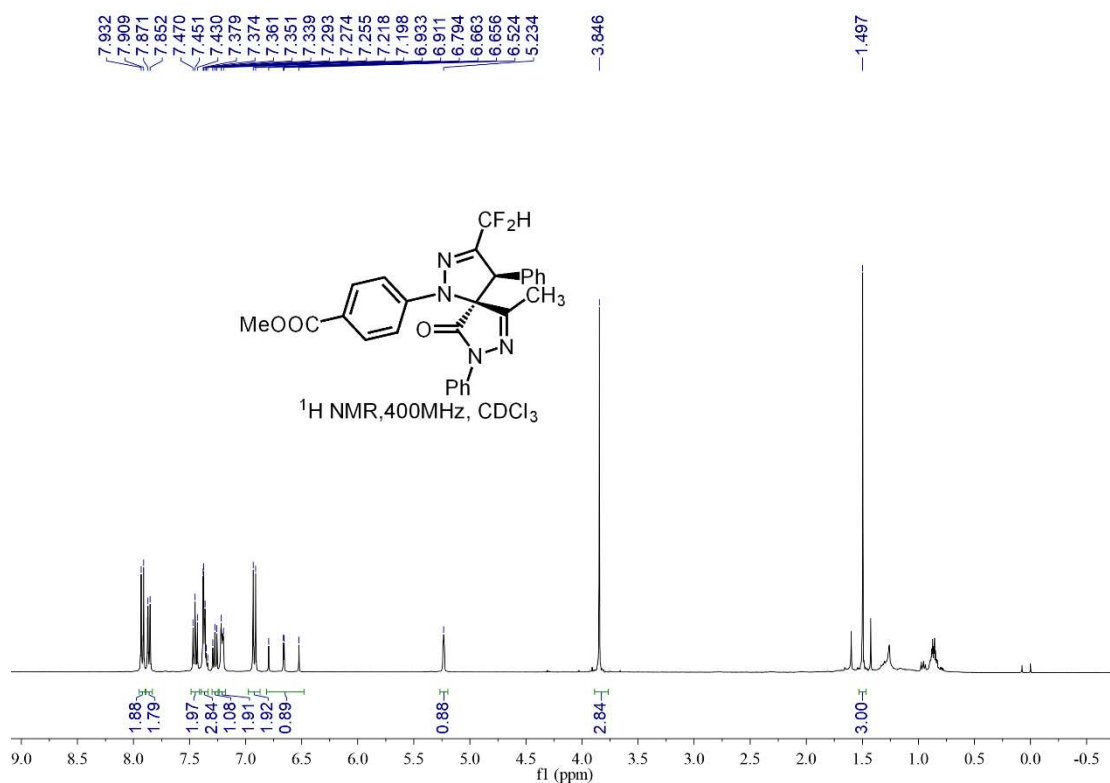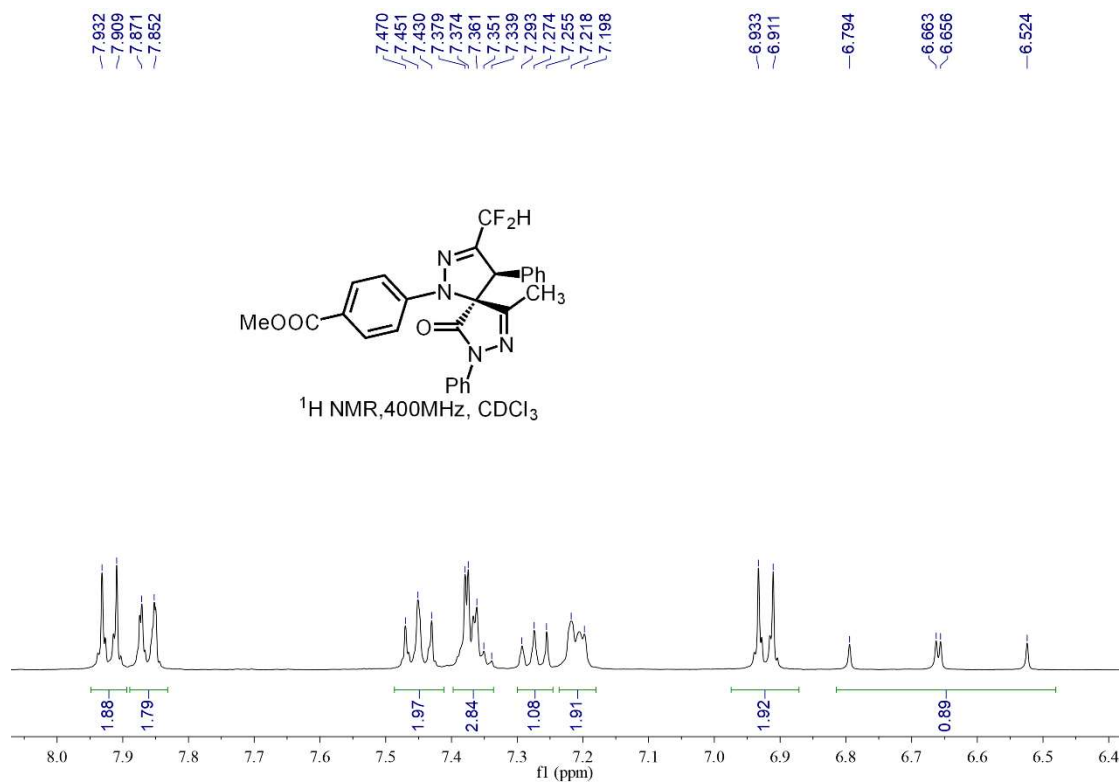

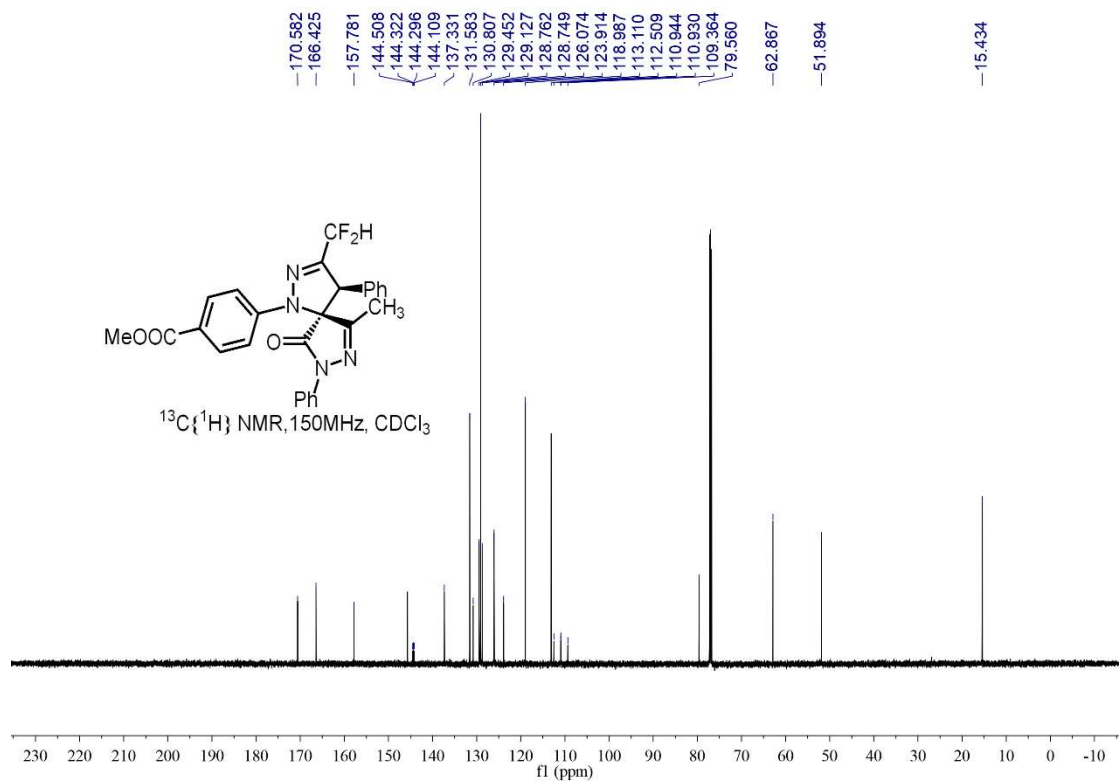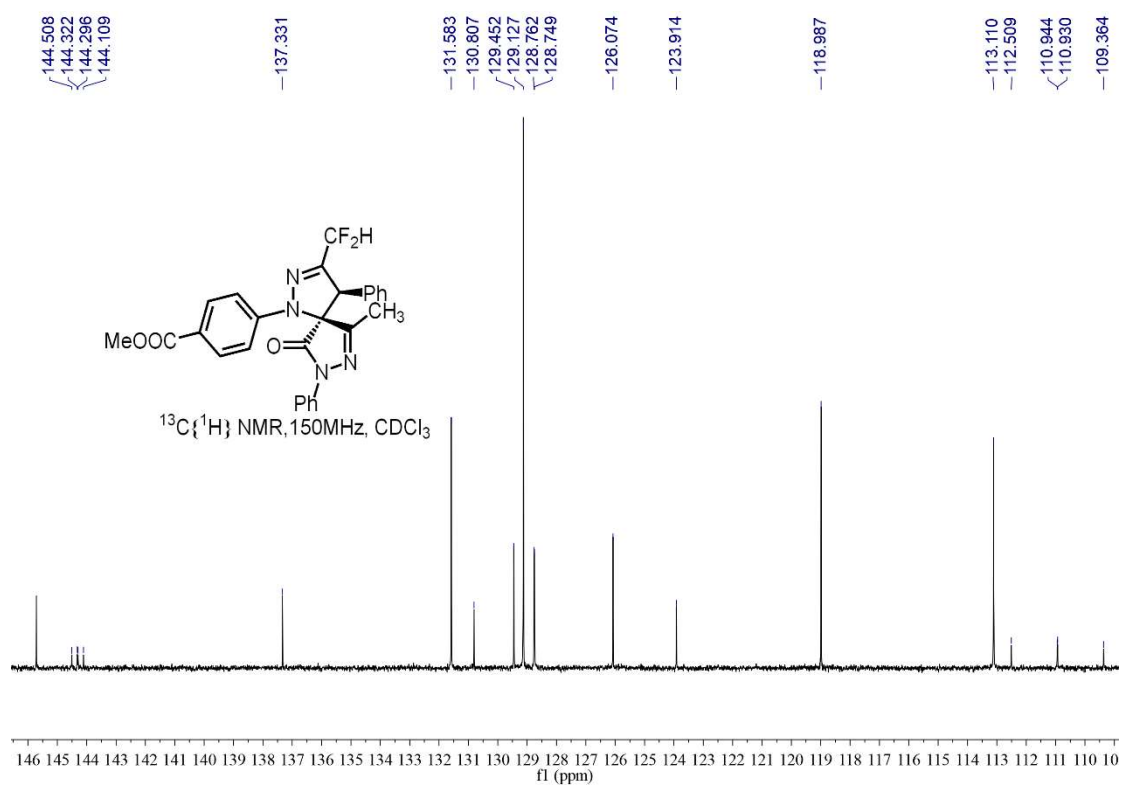

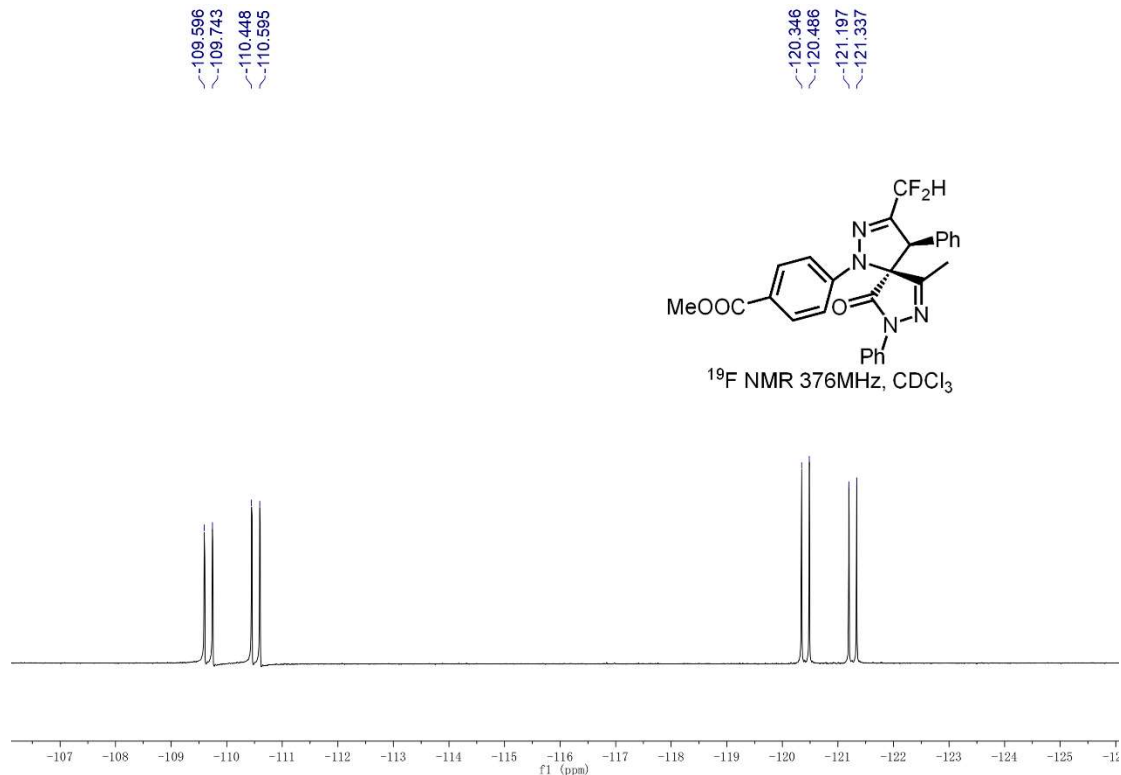

HRMS (ESI) copy of compound (*trans*)-3I:

Mass Spectrum SmartFormula Report

Analysis Info

Analysis Name D:\Data\user\NWNNU-fengyang 20220707-7.d  
 Method tune\_low.m  
 Sample Name A-27  
 Comment

Acquisition Date 2022-7-7 11:32:35  
 Operator BDAL@DE  
 Instrument / Ser# micrOTOF-Q 20453

Acquisition Parameter

|             |          |                       |           |                  |           |
|-------------|----------|-----------------------|-----------|------------------|-----------|
| Source Type | ESI      | Ion Polarity          | Positive  | Set Nebulizer    | 0.4 Bar   |
| Focus       | Active   | Set Capillary         | 4500 V    | Set Dry Heater   | 180 j°C   |
| Scan Begin  | 100 m/z  | Set End Plate Offset  | -500 V    | Set Dry Gas      | 4.0 l/min |
| Scan End    | 1000 m/z | Set Collision Cell RF | 500.0 Vpp | Set Divert Valve | Waste     |

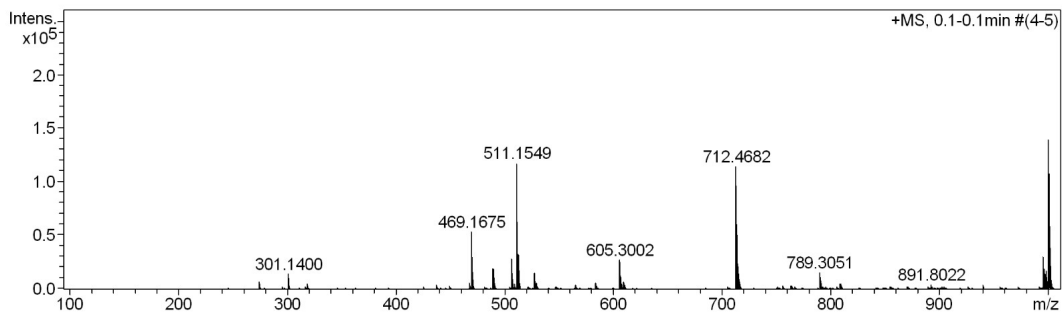

| Meas. #  | Formula                    | m/z      | err [ppm] | Me an err [ppm] | rdb  | N-R | e j ≠ Conf | mSi gm | Std l | St d | St d l | St d m/ | Std Com b |
|----------|----------------------------|----------|-----------|-----------------|------|-----|------------|--------|-------|------|--------|---------|-----------|
| 511.1549 | 1 C 27 H 22 F 2 N 4 Na O 3 | 511.1552 | 0.5       | 0.5             | 17.5 | ok  | even       | 14.1   | 23.0  | 0.6  | 7.7    | 1.9     | 842.7     |



NMR copies of compound (*cis*)-**3l**:

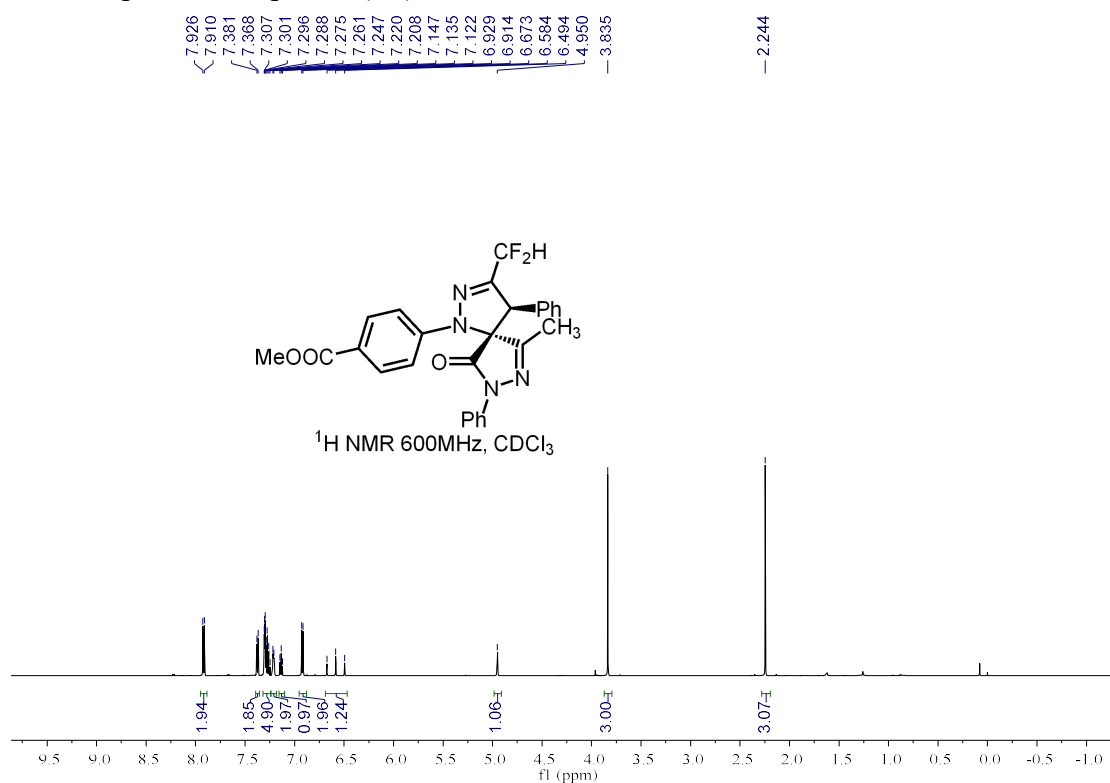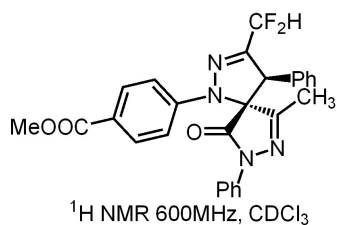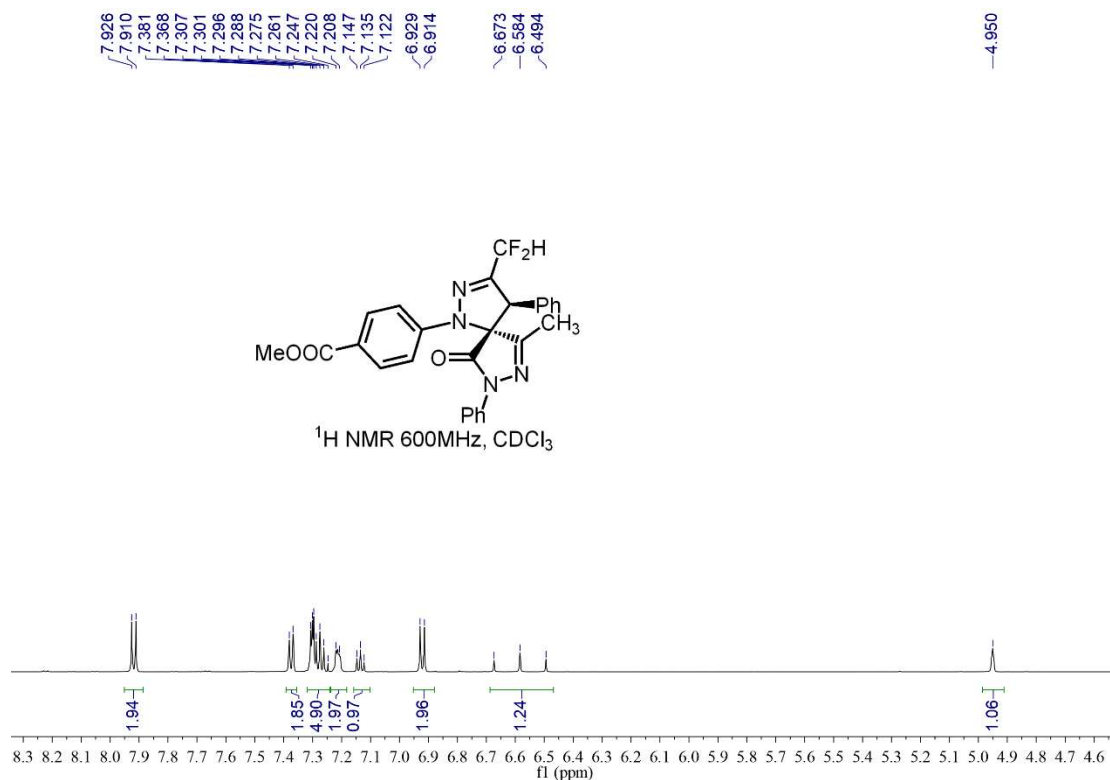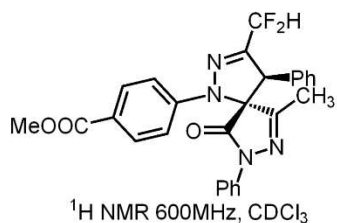

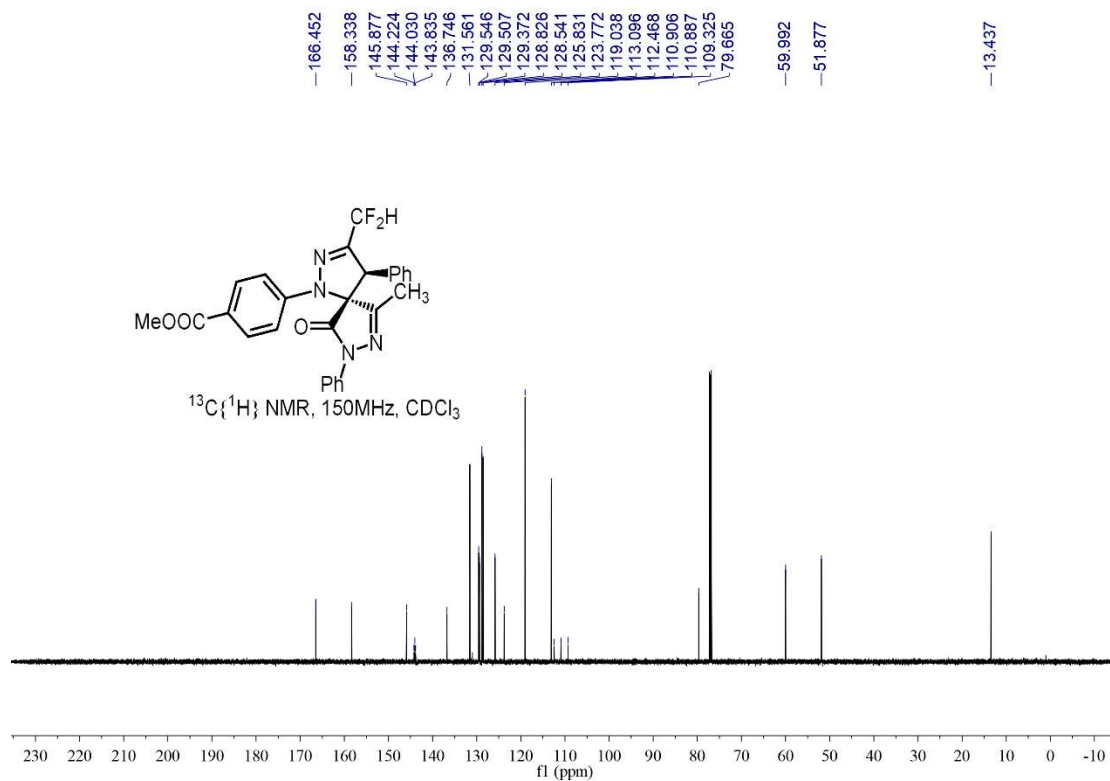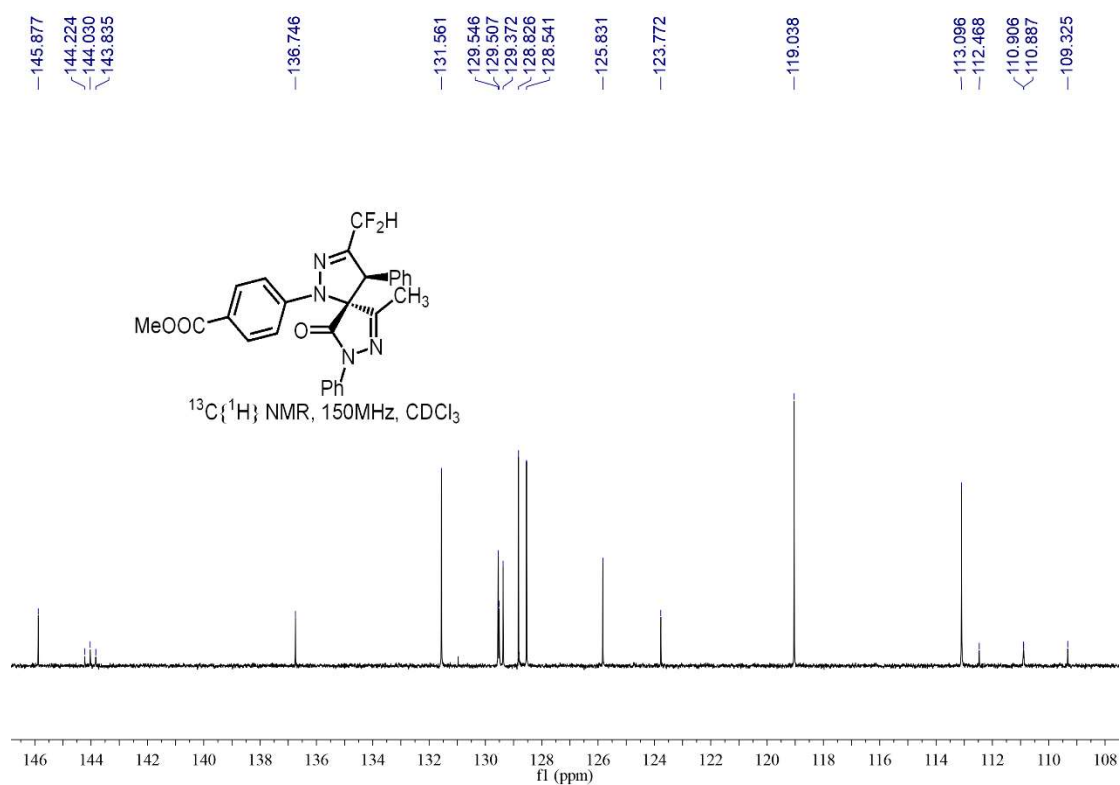

~117.362  
~117.507  
~118.212  
~118.356

~124.112  
~124.248  
~124.956  
~125.103

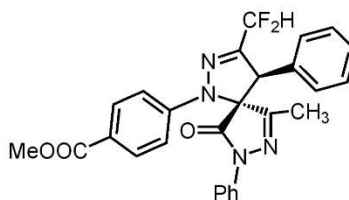

<sup>19</sup>F NMR 376MHz, CDCl<sub>3</sub>

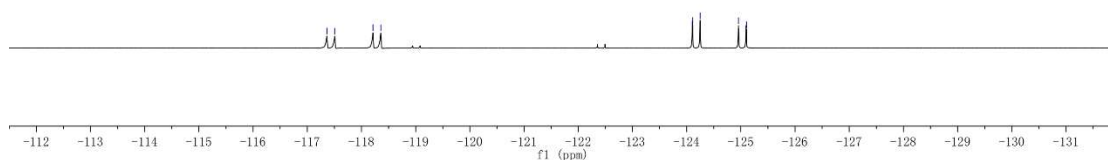

HRMS (ESI) copy of compound (*cis*)-3I:

### Mass Spectrum SmartFormula Report

#### Analysis Info

Analysis Name D:\Data\user\NWNNU-fengyang 20220707-8.d  
Method tune\_low.m  
Sample Name A-271  
Comment

Acquisition Date 2022-7-7 11:34:04

Operator BDAL@DE  
Instrument / Ser# microTOF-Q 20453

#### Acquisition Parameter

|             |          |                       |           |                  |           |
|-------------|----------|-----------------------|-----------|------------------|-----------|
| Source Type | ESI      | Ion Polarity          | Positive  | Set Nebulizer    | 0.4 Bar   |
| Focus       | Active   | Set Capillary         | 4500 V    | Set Dry Heater   | 180 i°C   |
| Scan Begin  | 100 m/z  | Set End Plate Offset  | -500 V    | Set Dry Gas      | 4.0 l/min |
| Scan End    | 1000 m/z | Set Collision Cell RF | 500.0 Vpp | Set Divert Valve | Waste     |

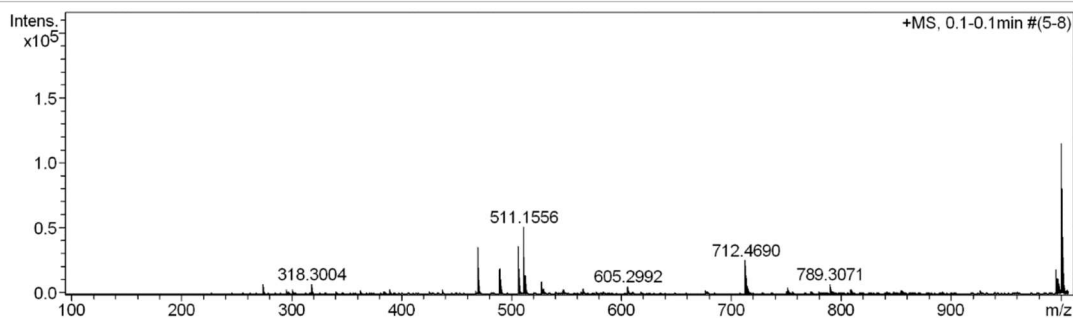

| Meas. #  | Formula                                                                          | m/z      | err [ppm] | Me an err [ppm] | rdb  | N-R | e_j Con | mSi gm | Std l | St d | St d l | St d m/ | Std Com b |
|----------|----------------------------------------------------------------------------------|----------|-----------|-----------------|------|-----|---------|--------|-------|------|--------|---------|-----------|
| 511.1556 | 1 C <sub>27</sub> H <sub>22</sub> F <sub>2</sub> N <sub>4</sub> NaO <sub>3</sub> | 511.1552 | -0.7      | -0.6            | 17.5 | ok  | even    | 17.5   | 28.0  | 0.7  | 9.4    | 2.0     | 842.7     |

NMR copies of compound (*trans*)-3m:

7.891  
7.871  
7.771  
7.748  
7.735  
7.715  
7.555  
7.489  
7.470  
7.450  
7.434  
7.412  
7.378  
7.342  
7.322  
7.306  
7.288  
7.269  
7.258  
7.005  
6.999  
6.848  
6.716  
6.709  
6.577  
5.274

-1.526

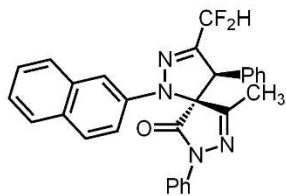

<sup>1</sup>H NMR, 400MHz, CDCl<sub>3</sub>

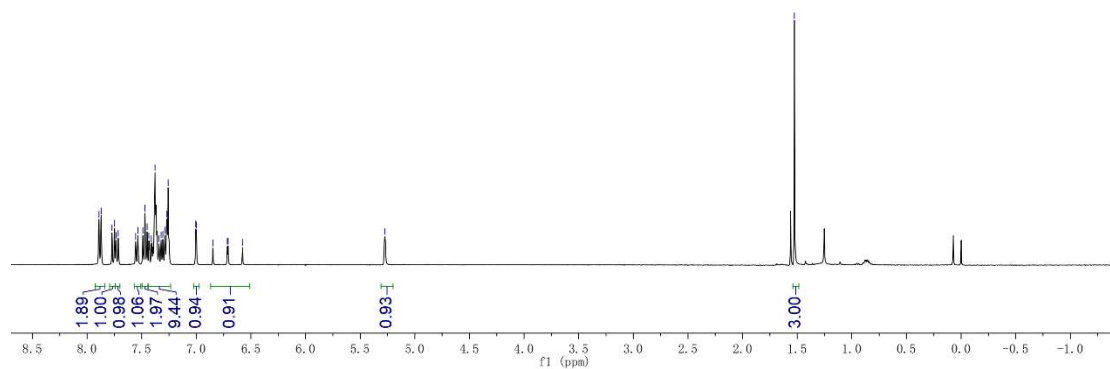

7.891  
7.871  
7.771  
7.748  
7.735  
7.715  
7.555  
7.489  
7.470  
7.450  
7.434  
7.412  
7.378  
7.342  
7.322  
7.306  
7.288  
7.269  
7.258  
7.005  
6.999  
6.848  
6.716  
6.709  
6.577

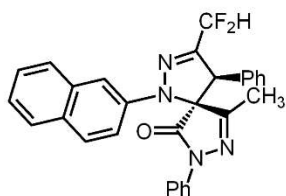

<sup>1</sup>H NMR, 400MHz, CDCl<sub>3</sub>

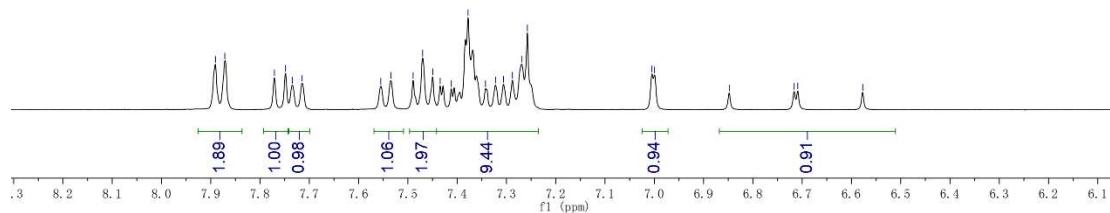

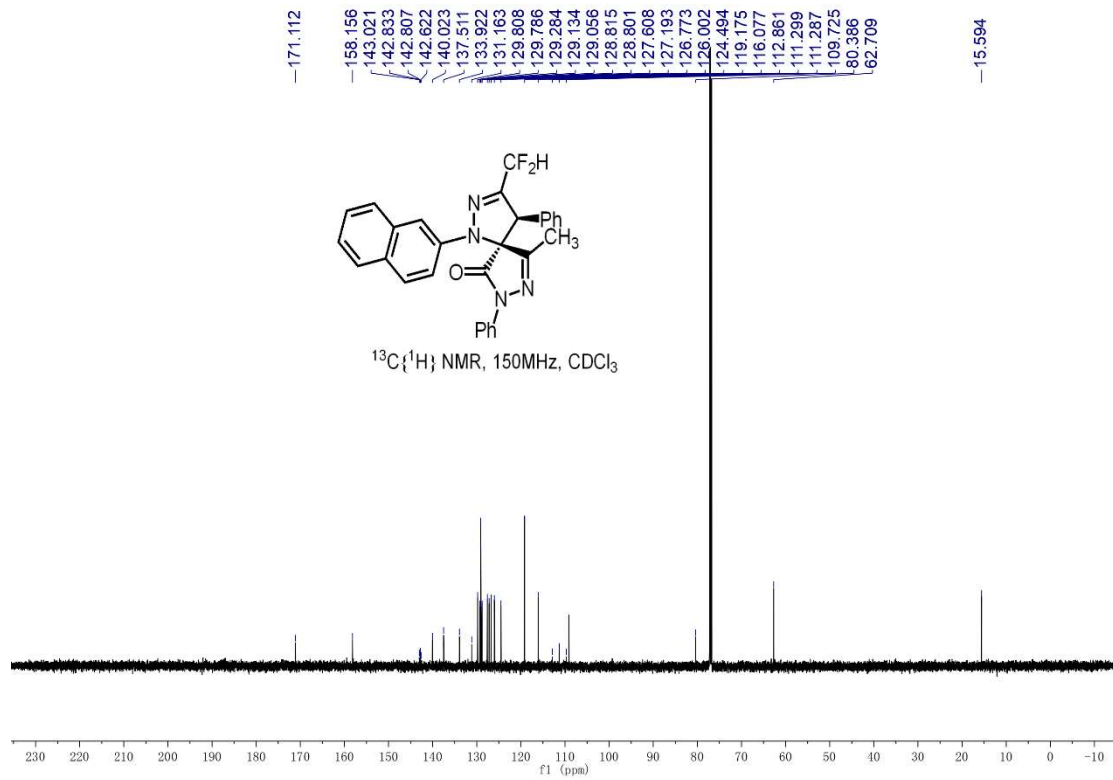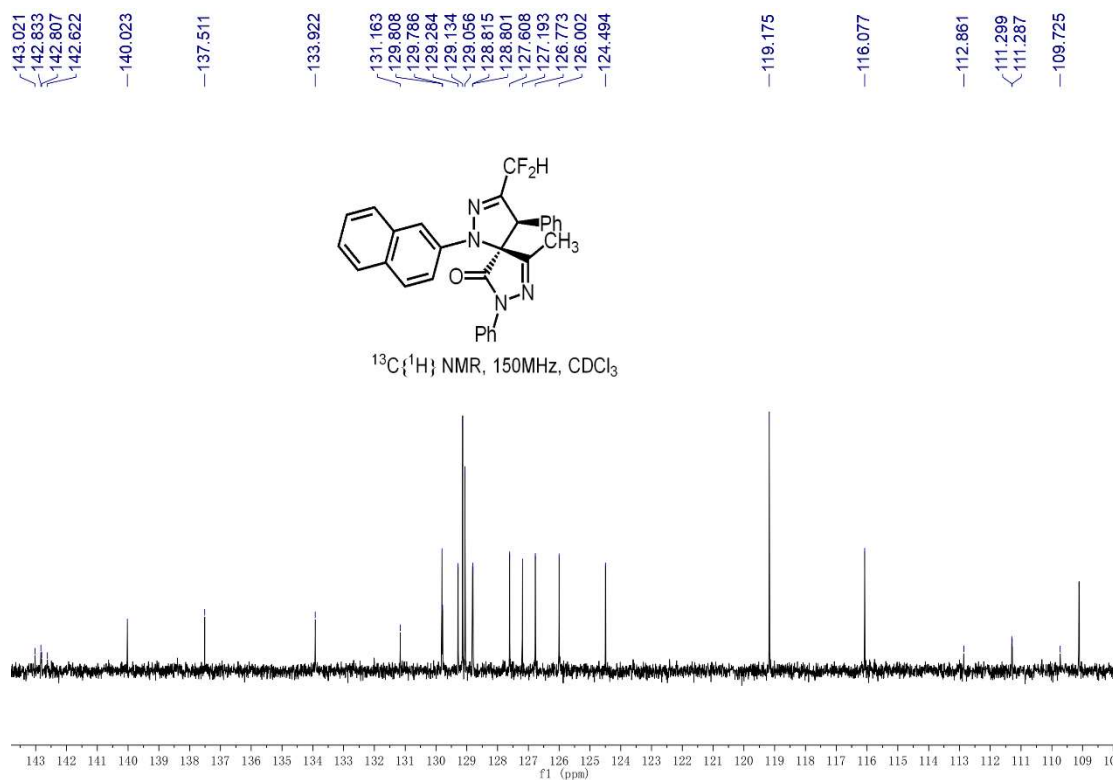

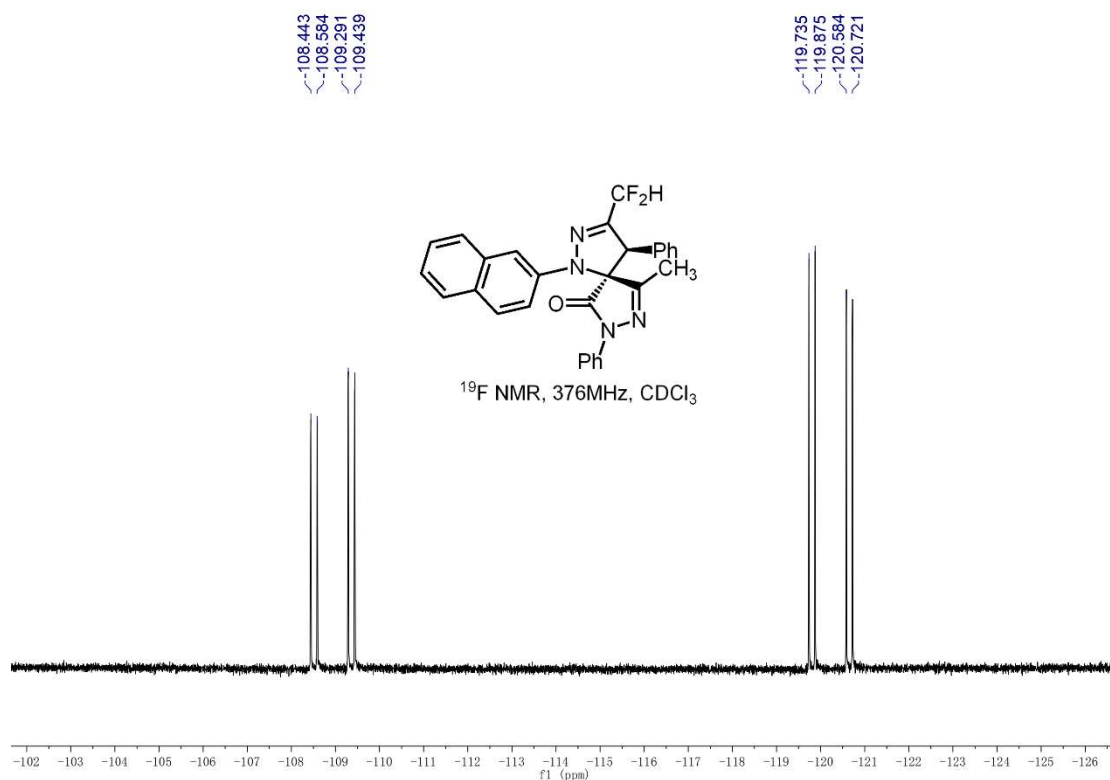

HRMS (ESI) copy of compound (*trans*)-**3m**:

### Mass Spectrum SmartFormula Report

**Analysis Info**

Analysis Name D:\Data\user\NWNNU-fengyang 20230321-3.d  
 Method tune\_low.m  
 Sample Name A-23  
 Comment

Acquisition Date 2023-3-21 15:33:32

Operator BDAL@DE  
 Instrument / Ser# micrOTOF-Q 20453

**Acquisition Parameter**

|             |          |                       |           |                  |                   |
|-------------|----------|-----------------------|-----------|------------------|-------------------|
| Source Type | ESI      | Ion Polarity          | Positive  | Set Nebulizer    | 0.4 Bar           |
| Focus       | Active   | Set Capillary         | 4500 V    | Set Dry Heater   | 180 $\mu\text{C}$ |
| Scan Begin  | 50 m/z   | Set End Plate Offset  | -500 V    | Set Dry Gas      | 4.0 l/min         |
| Scan End    | 1000 m/z | Set Collision Cell RF | 300.0 Vpp | Set Divert Valve | Waste             |

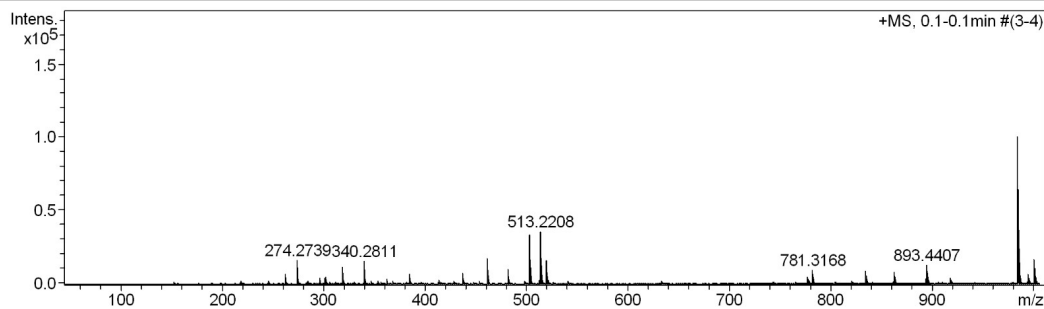

| Meas. #  | Formula                                                             | m/z      | err [ppm] | Me an err [ppm] | rdb  | N-R | e <sub>j</sub> Conf | mS  | Std  | Std | Std | Std  | Std   |
|----------|---------------------------------------------------------------------|----------|-----------|-----------------|------|-----|---------------------|-----|------|-----|-----|------|-------|
| m/z      |                                                                     |          |           |                 |      | ul  |                     | ig  | l    | Me  | l   | m/   | Com   |
|          |                                                                     |          |           |                 |      |     |                     | ma  |      | an  | Va  | z    | Dev   |
|          |                                                                     |          |           |                 |      |     |                     |     |      | m/  | rN  | Diff |       |
|          |                                                                     |          |           |                 |      |     |                     |     |      | z   | or  | m    |       |
| 503.1654 | 1 C <sub>29</sub> H <sub>22</sub> F <sub>2</sub> N <sub>4</sub> NaO | 503.1654 | -0.1      | 0.1             | 19.5 | ok  | even                | 7.7 | 12.7 | 0.5 | 4.7 | 1.7  | 842.7 |

NMR copies of compound (*cis*)-**3m**:

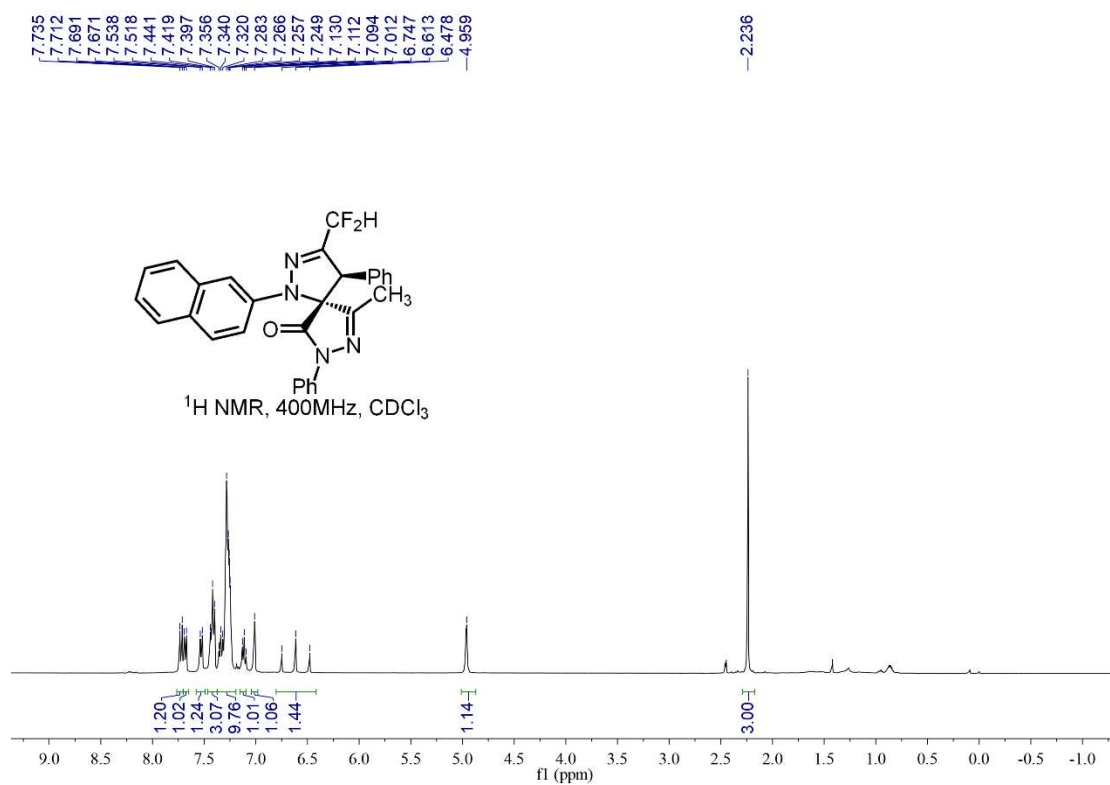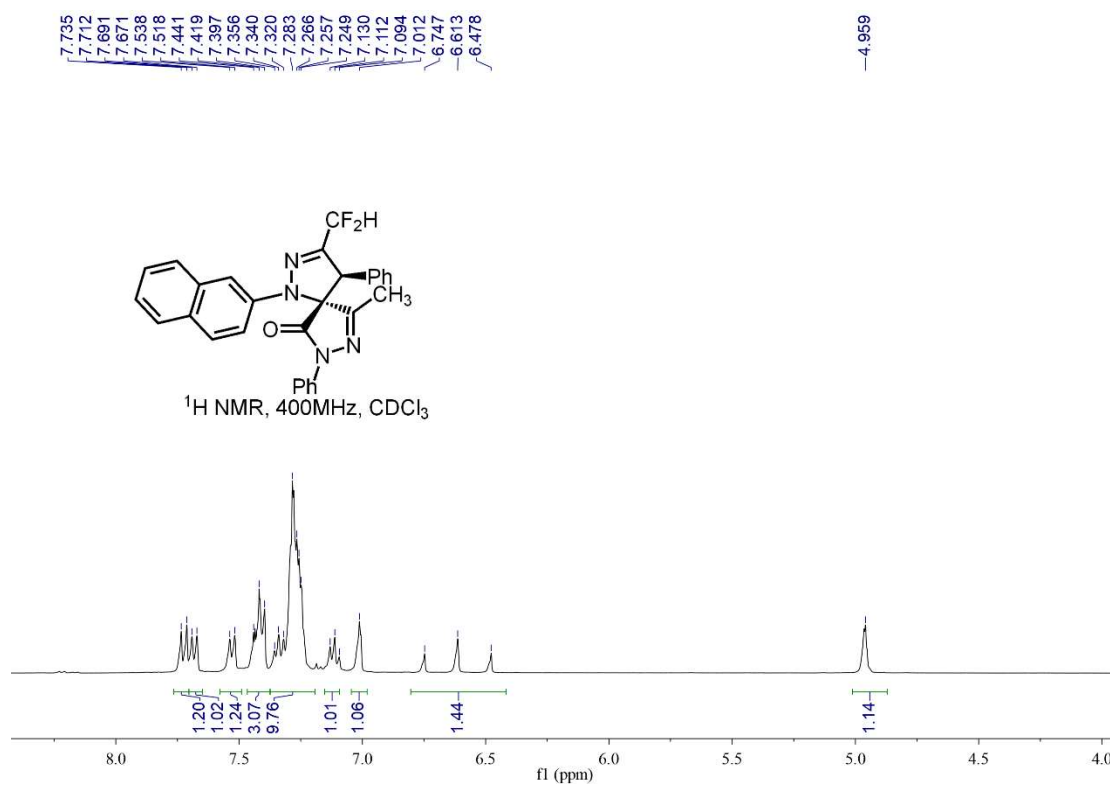

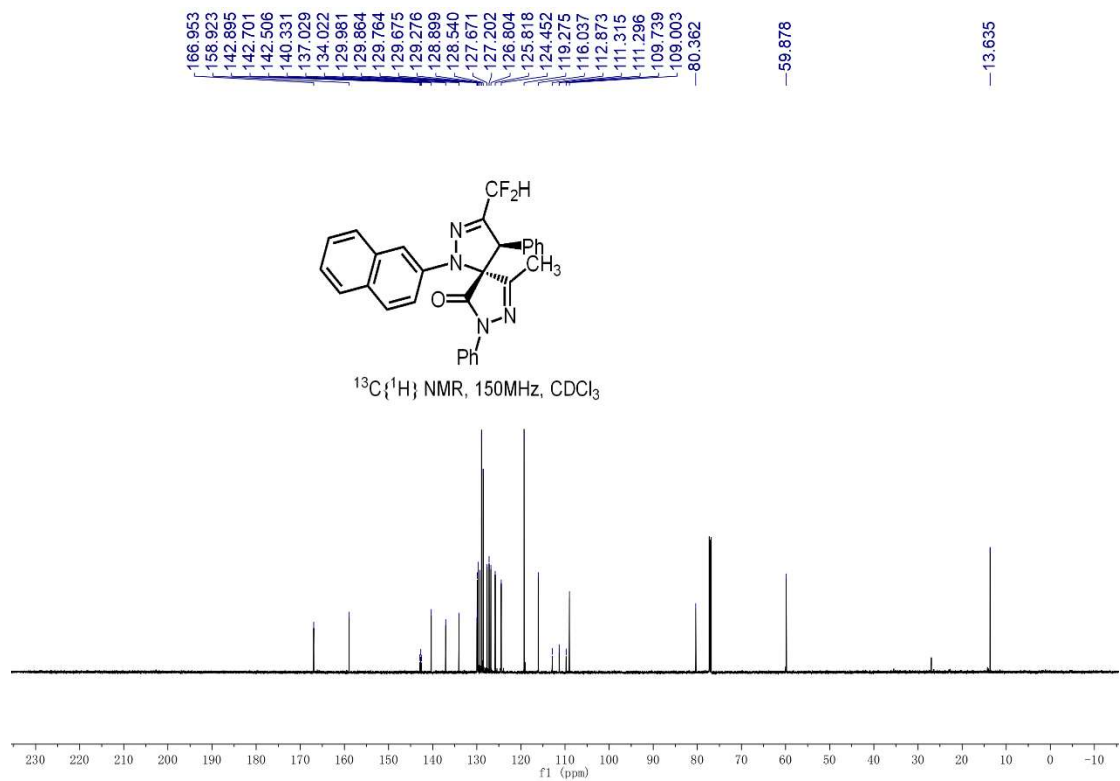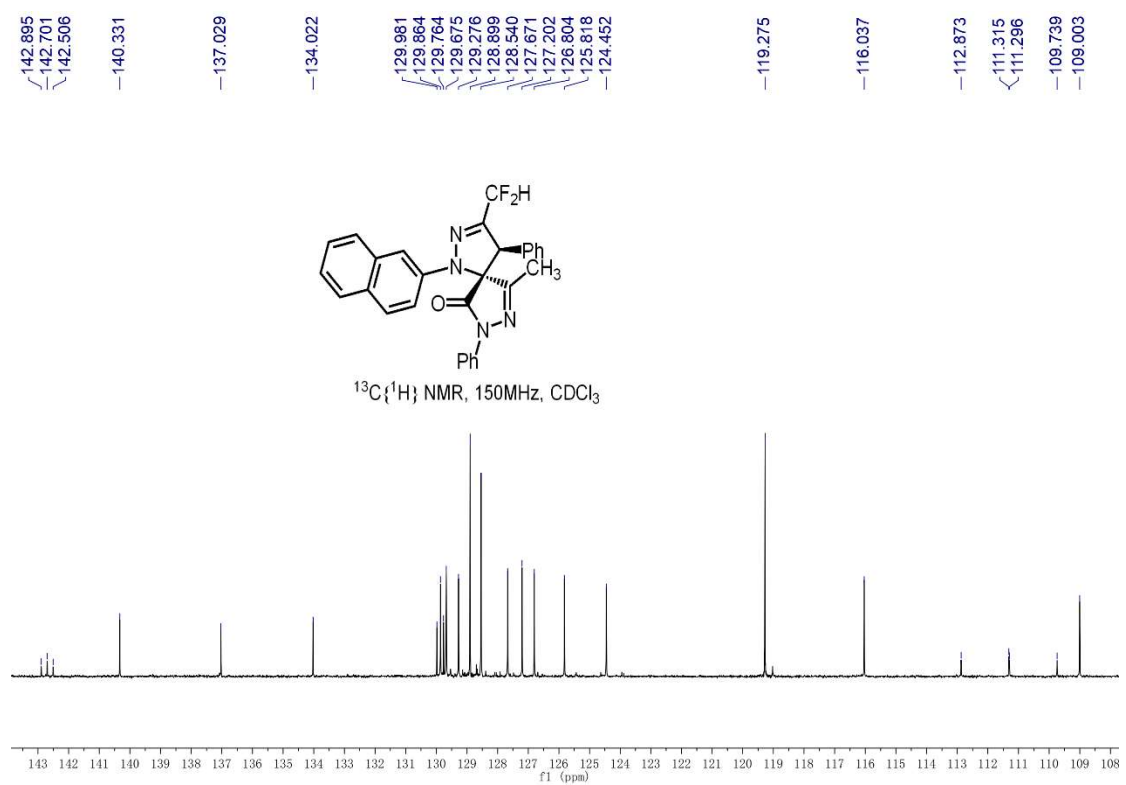



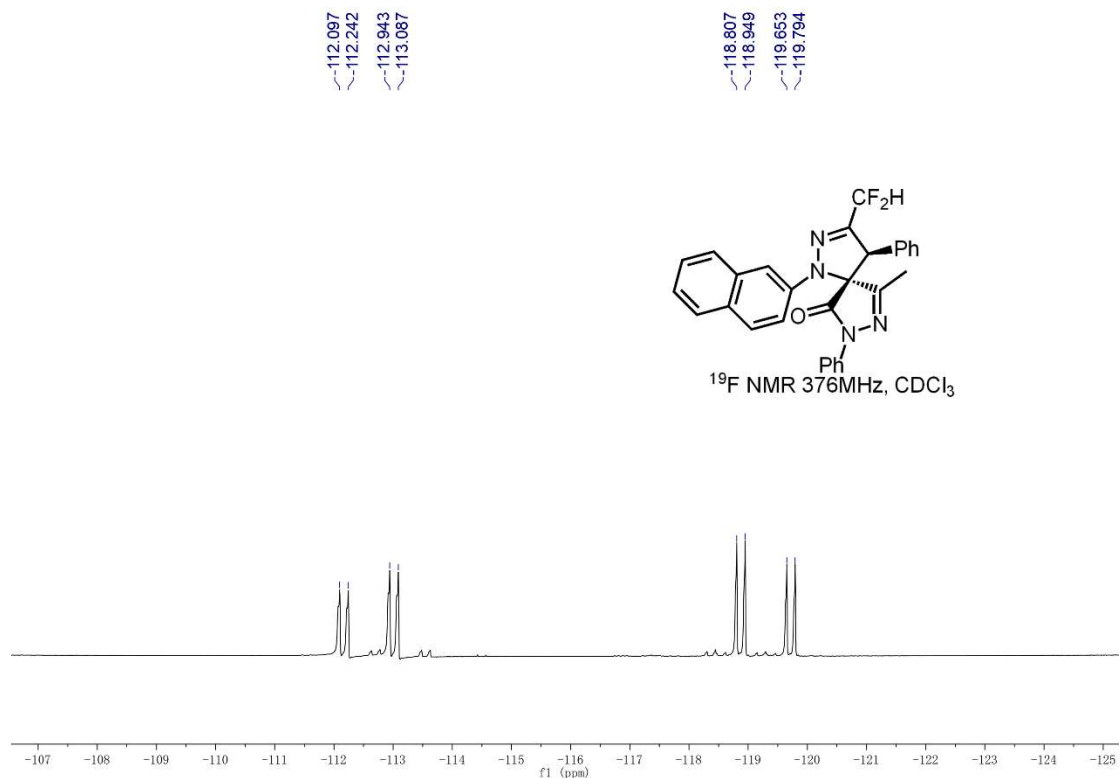

HRMS (ESI) copy of compound (*cis*)-**3m**:

### Mass Spectrum SmartFormula Report

#### Analysis Info

Analysis Name D:\Data\user\NWNNU-fengyang 20220707-3.d  
 Method tune\_low.m  
 Sample Name A-231  
 Comment

Acquisition Date 2022-7-7 11:26:47

Operator BDAL@DE  
 Instrument / Ser# micrOTOF-Q 20453

#### Acquisition Parameter

|             |          |                       |           |                  |           |
|-------------|----------|-----------------------|-----------|------------------|-----------|
| Source Type | ESI      | Ion Polarity          | Positive  | Set Nebulizer    | 0.4 Bar   |
| Focus       | Active   | Set Capillary         | 4500 V    | Set Dry Heater   | 180 j°C   |
| Scan Begin  | 100 m/z  | Set End Plate Offset  | -500 V    | Set Dry Gas      | 4.0 l/min |
| Scan End    | 1000 m/z | Set Collision Cell RF | 500.0 Vpp | Set Divert Valve | Waste     |

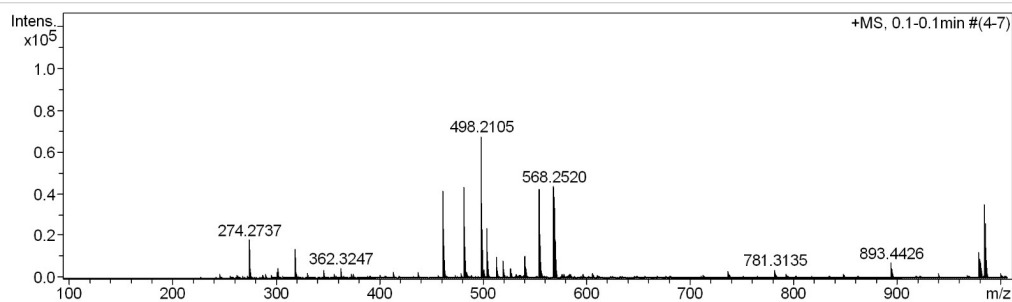

| Meas. #  | Formula                                                           | m/z      | err [ppm] | Me an err [ppm] | rdb  | N-R | ej% Conf | mSi gma | Std l | Std Me an z | Std l Va rN or m | Std m/ rN Diff | Std z | Std Com b Dev |
|----------|-------------------------------------------------------------------|----------|-----------|-----------------|------|-----|----------|---------|-------|-------------|------------------|----------------|-------|---------------|
| 481.1835 | 1 C <sub>29</sub> H <sub>23</sub> F <sub>2</sub> N <sub>4</sub> O | 481.1834 | -0.0      | 0.8             | 19.5 | ok  | even     | 10.0    | 18.0  | 1.0         | 7.3              | 2.6            | 842.7 |               |

NMR copies of compound (*trans*)-4a:

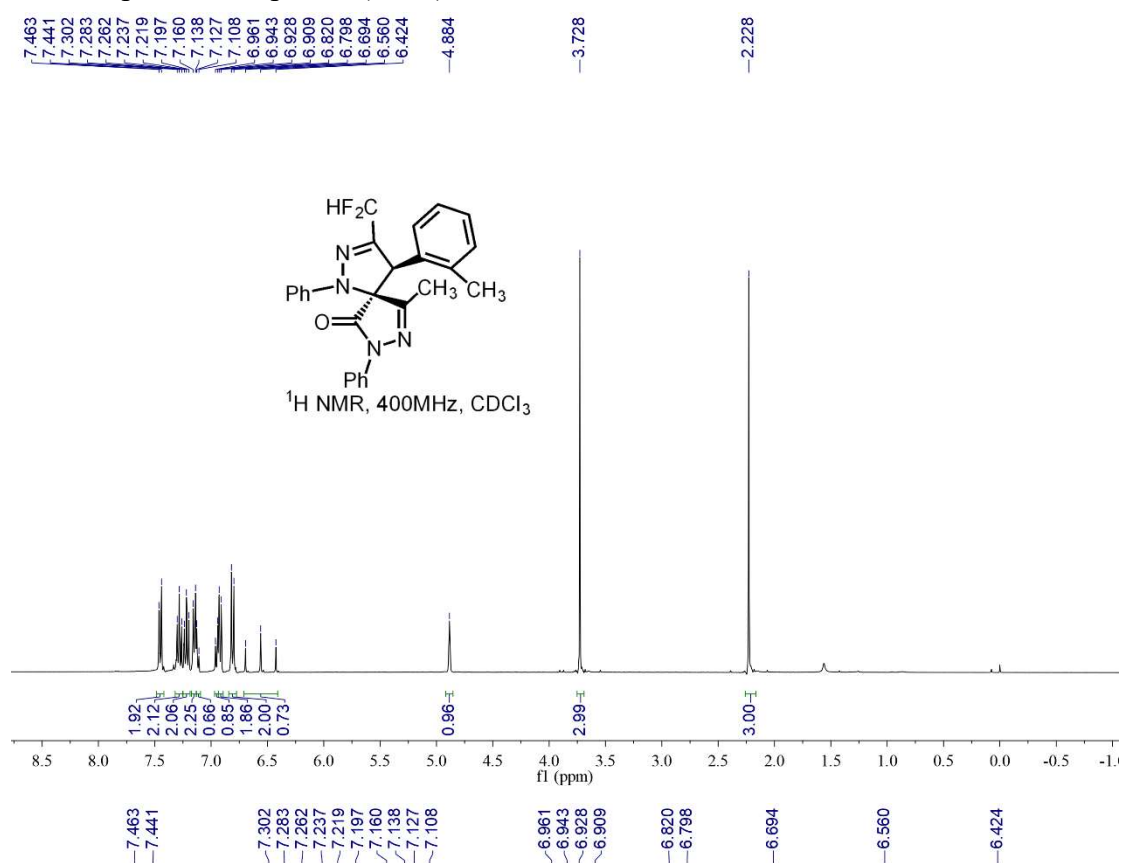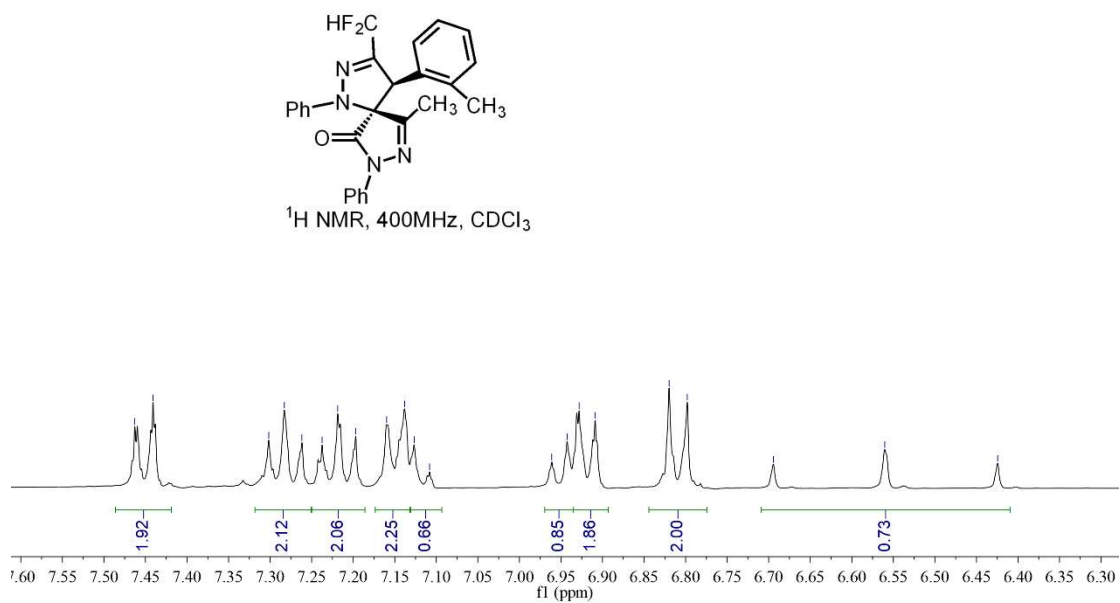

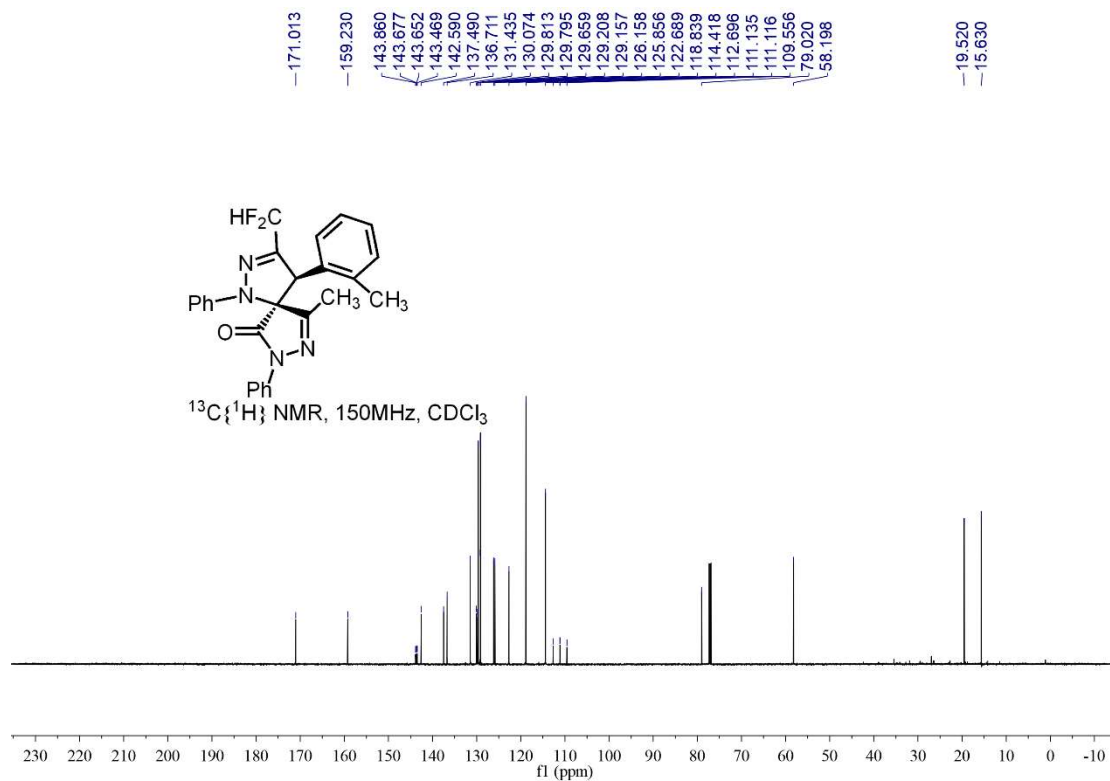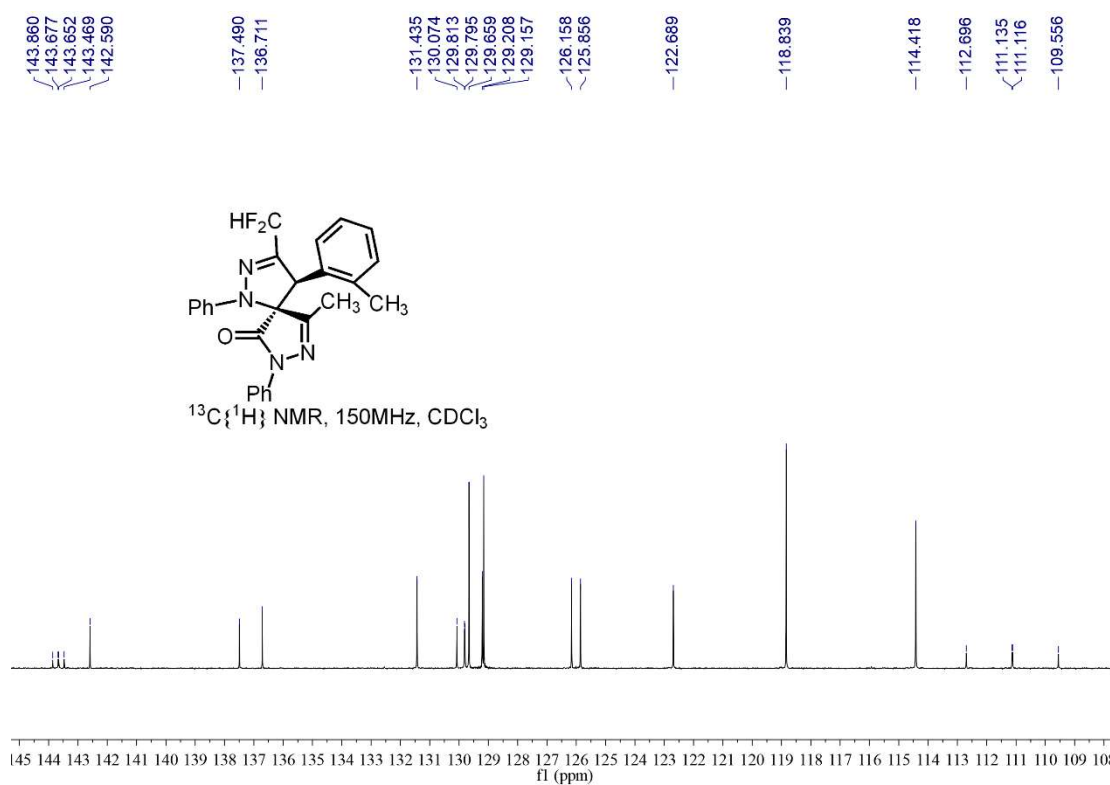

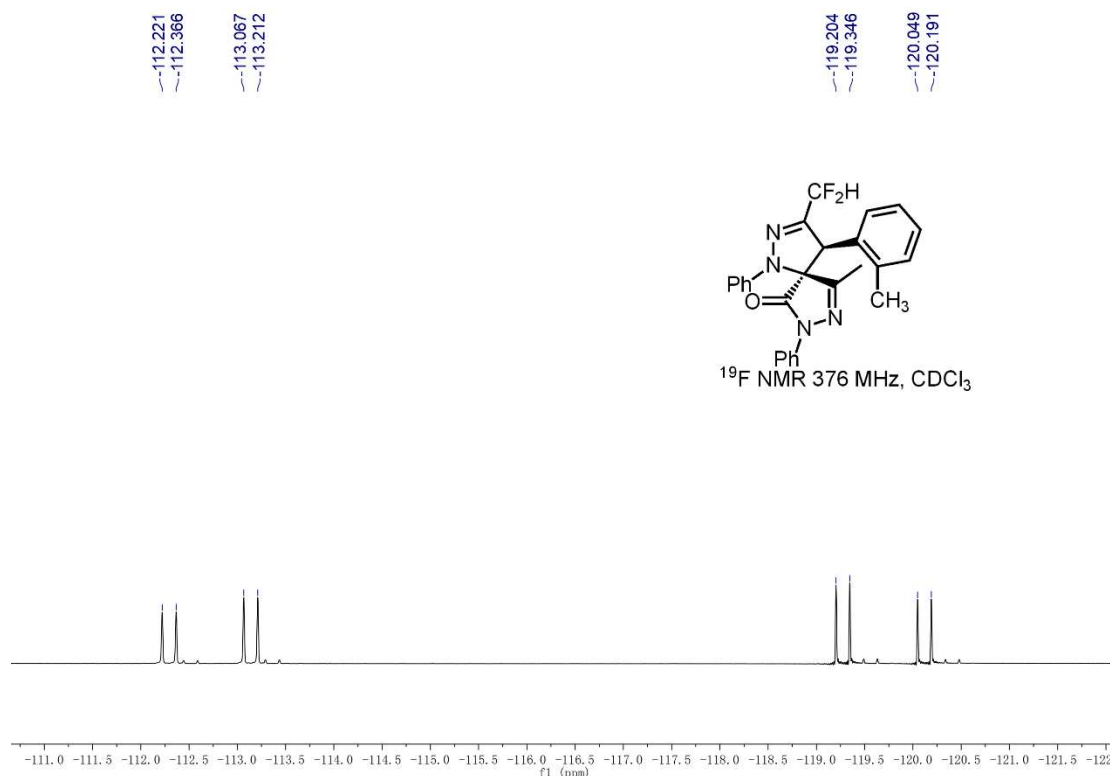

HRMS (ESI) copy of compound (*trans*)-4a:

### Mass Spectrum SmartFormula Report

#### Analysis Info

Analysis Name D:\Data\user\NWN-ufengyang 20220707-11.d  
 Method tune\_low.m  
 Sample Name A-30  
 Comment

Acquisition Date 2022-7-7 11:37:22  
 Operator BDAL@DE  
 Instrument / Ser# micrOTOF-Q 20453

#### Acquisition Parameter

|             |          |                       |           |                  |           |
|-------------|----------|-----------------------|-----------|------------------|-----------|
| Source Type | ESI      | Ion Polarity          | Positive  | Set Nebulizer    | 0.4 Bar   |
| Focus       | Active   | Set Capillary         | 4500 V    | Set Dry Heater   | 180 j°C   |
| Scan Begin  | 100 m/z  | Set End Plate Offset  | -500 V    | Set Dry Gas      | 4.0 l/min |
| Scan End    | 1000 m/z | Set Collision Cell RF | 500.0 Vpp | Set Divert Valve | Waste     |

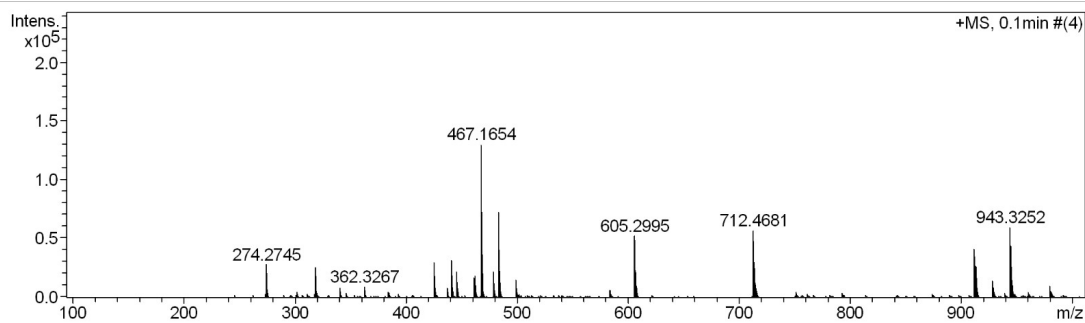

| Meas. #  | Formula                                                             | m/z      | err [ppm] | Me an err [ppm] | rdb  | N-R | e j ≠ Conf | m Sigma | Std l | St d l | St d l | St d l | Std Com b Dev |
|----------|---------------------------------------------------------------------|----------|-----------|-----------------|------|-----|------------|---------|-------|--------|--------|--------|---------------|
| 467.1654 | 1 C <sub>26</sub> H <sub>22</sub> F <sub>2</sub> N <sub>4</sub> NaO | 467.1654 | -0.1      | -0.3            | 16.5 | ok  | even       | 8.5     | 12.4  | 0.3    | 5.3    | 0.6    | 842.7         |

NMR copies of compound (*cis*)-4a:

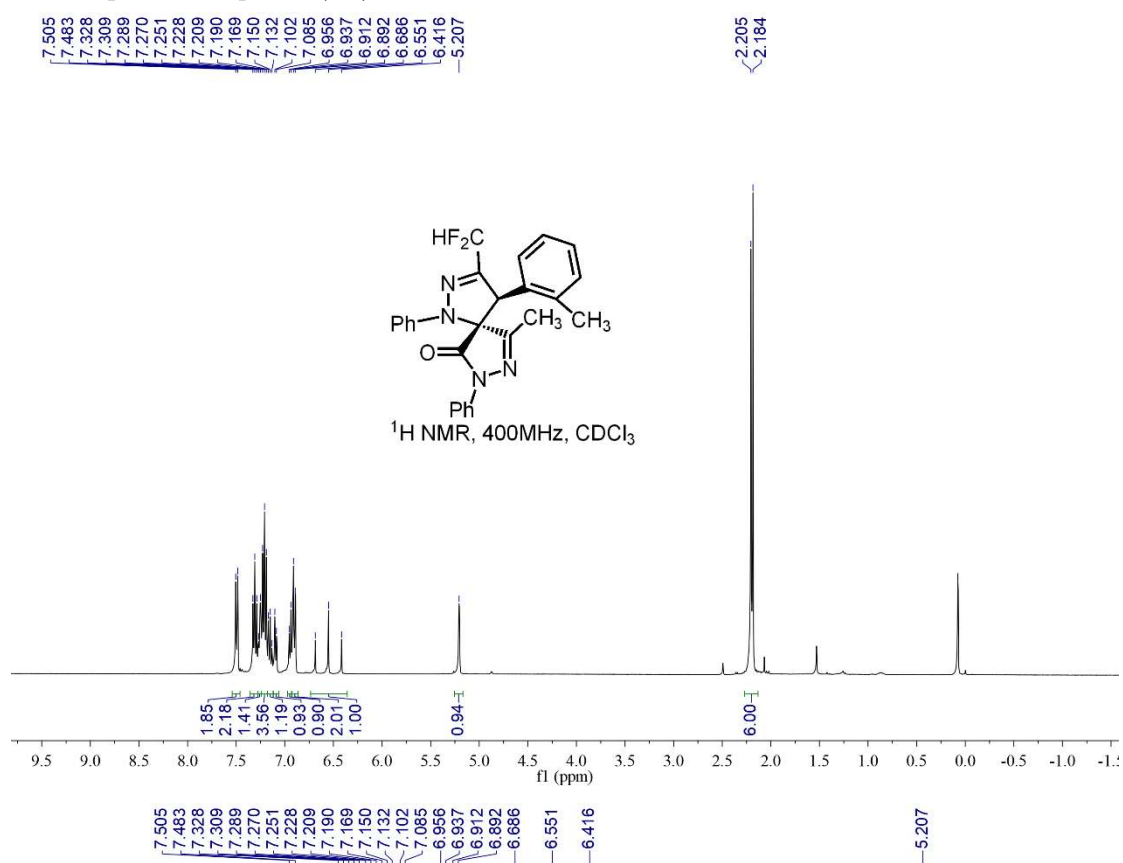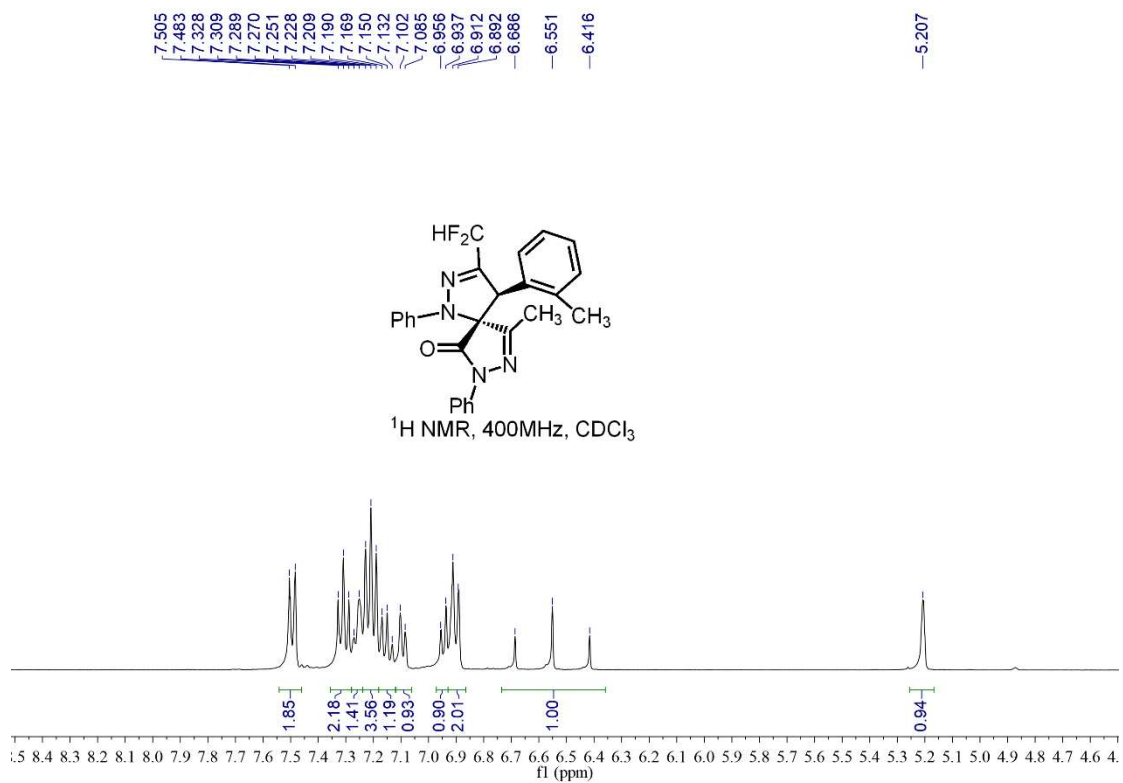

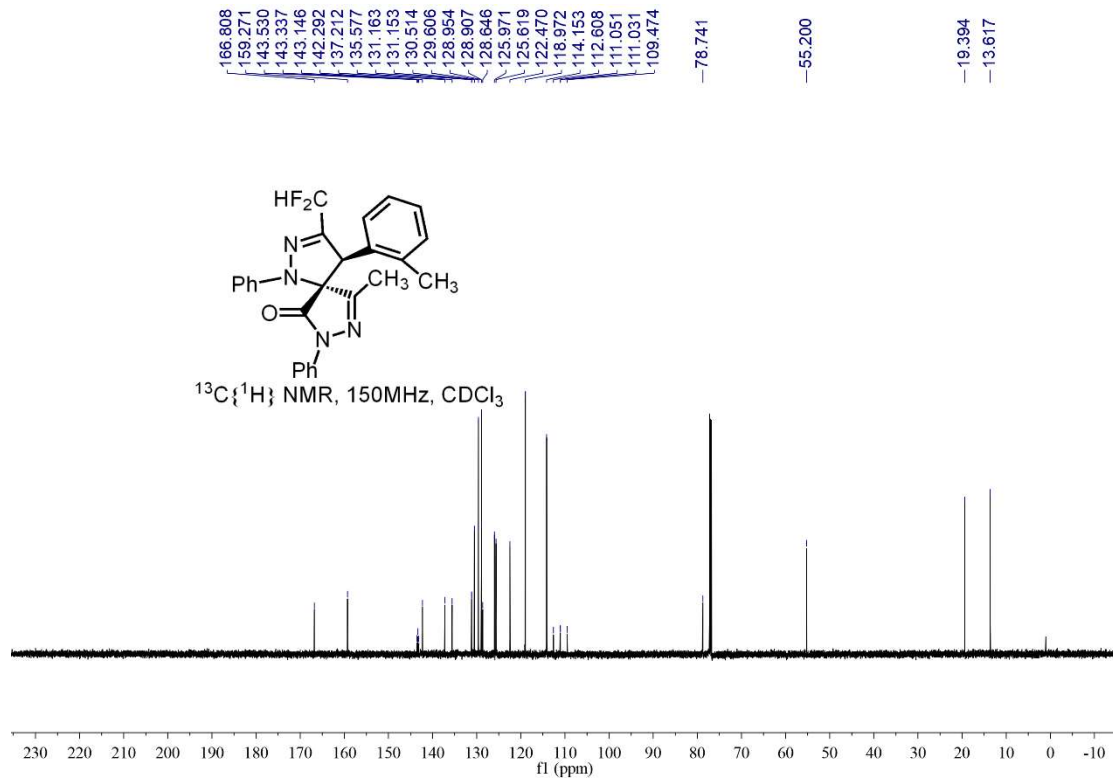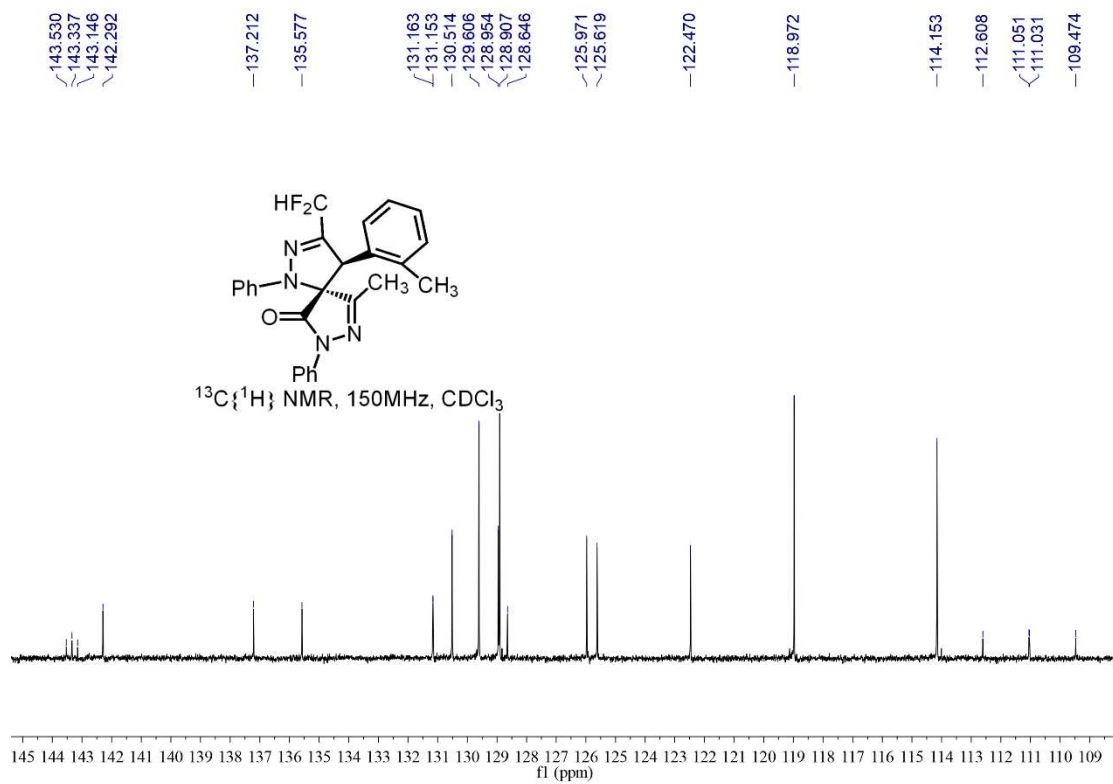

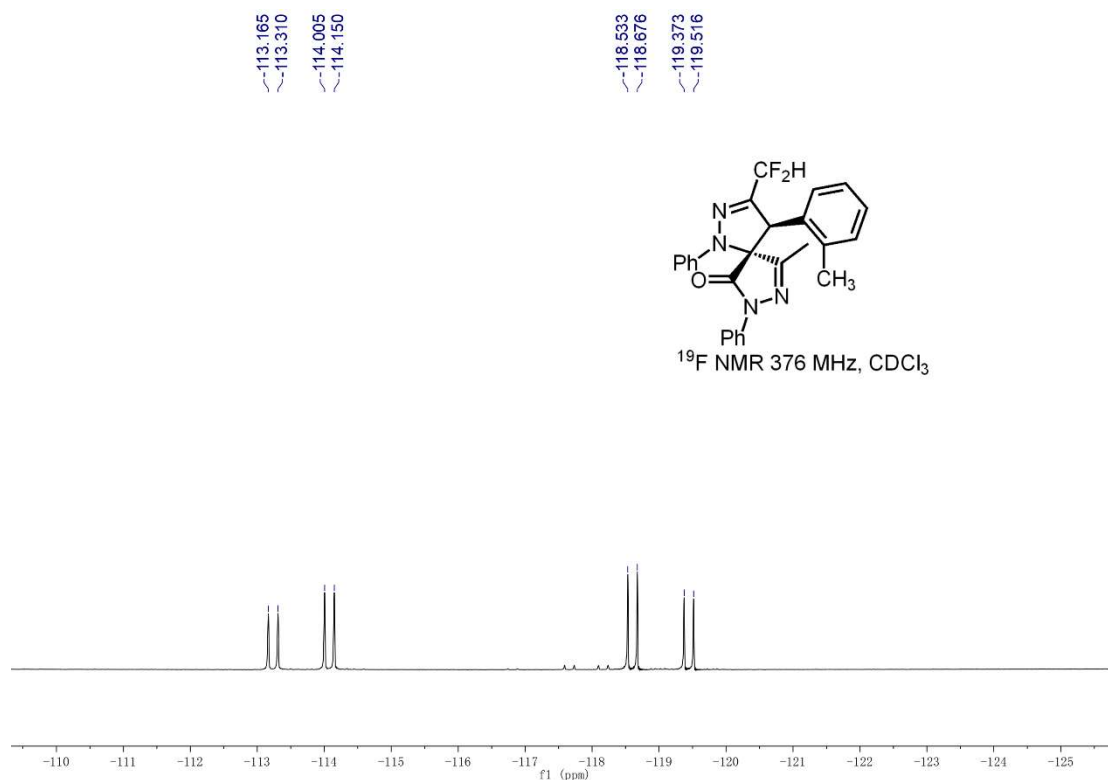

HRMS (ESI) copy of compound (*cis*)-4a:

### Mass Spectrum SmartFormula Report

#### Analysis Info

Analysis Name D:\Data\user\NWNUN-fengyang 20220707-12.d  
 Method tune\_low.m  
 Sample Name A-301  
 Comment

Acquisition Date 2022-7-7 11:39:22

Operator BDAL@DE  
 Instrument / Ser# micrOTOF-Q 20453

#### Acquisition Parameter

|             |          |                       |           |                  |           |
|-------------|----------|-----------------------|-----------|------------------|-----------|
| Source Type | ESI      | Ion Polarity          | Positive  | Set Nebulizer    | 0.4 Bar   |
| Focus       | Active   | Set Capillary         | 4500 V    | Set Dry Heater   | 180 j°C   |
| Scan Begin  | 100 m/z  | Set End Plate Offset  | -500 V    | Set Dry Gas      | 4.0 l/min |
| Scan End    | 1000 m/z | Set Collision Cell RF | 500.0 Vpp | Set Divert Valve | Waste     |

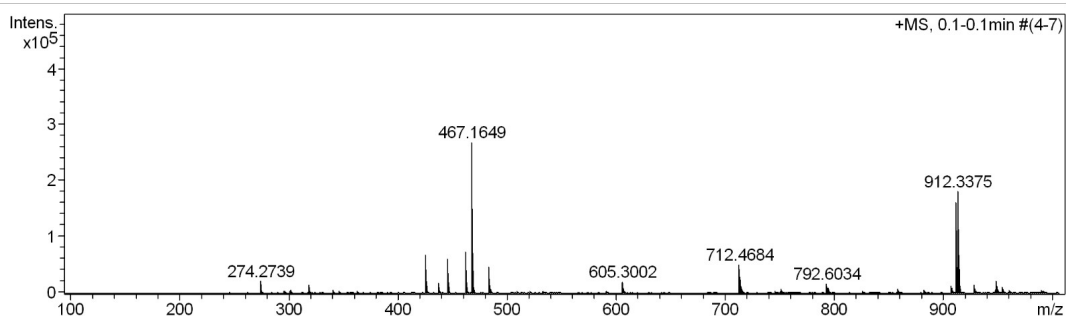

| Meas. #  | Formula                                                             | m/z      | err [ppm] | Me an err [ppm] | rdb  | N-R Conf | ej% Conf | mSi gma | Std l | St d Me an m/z | Std l Var Nor m | St d m/z Dif f | Std Com b Dev |
|----------|---------------------------------------------------------------------|----------|-----------|-----------------|------|----------|----------|---------|-------|----------------|-----------------|----------------|---------------|
| 467.1649 | 1 C <sub>26</sub> H <sub>22</sub> F <sub>2</sub> N <sub>4</sub> NaO | 467.1654 | 0.9       | 0.3             | 16.5 | ok       | even     | 16.4    | 24.7  | 0.6            | 10.5            | 1.3            | 842.7         |

NMR copies of compound (*trans*)-4b:

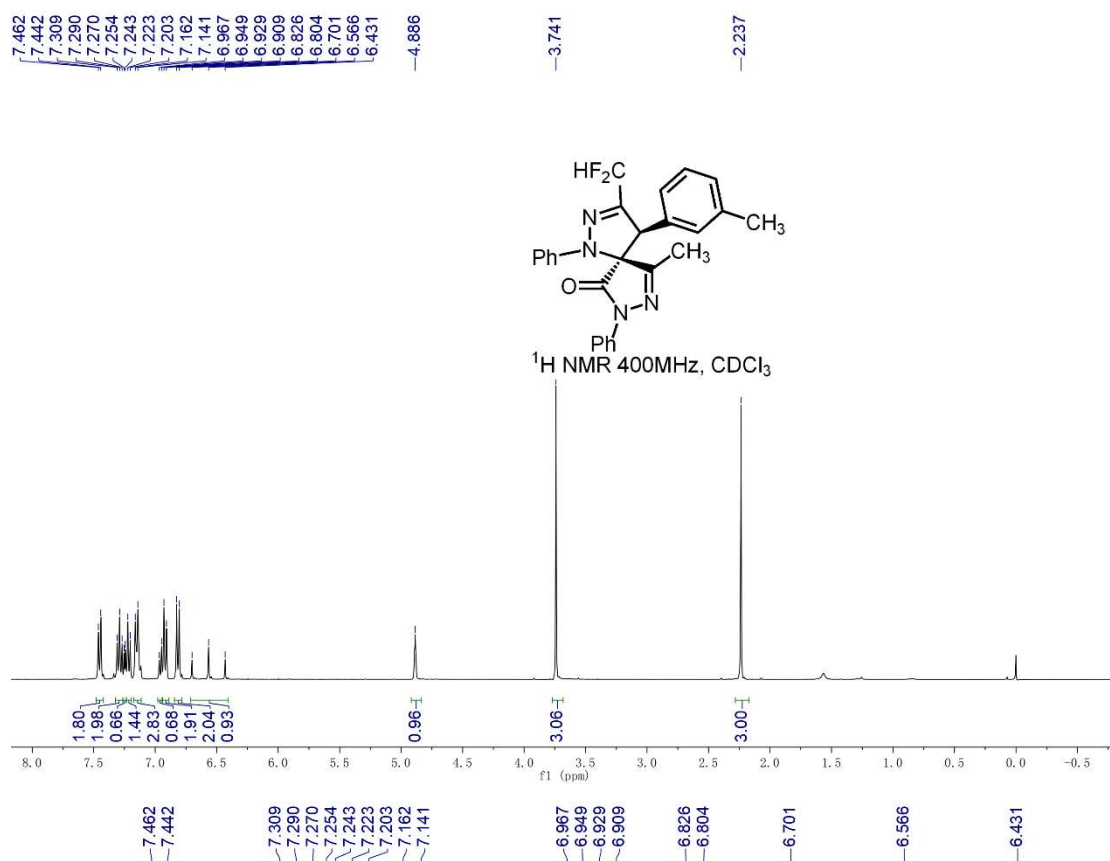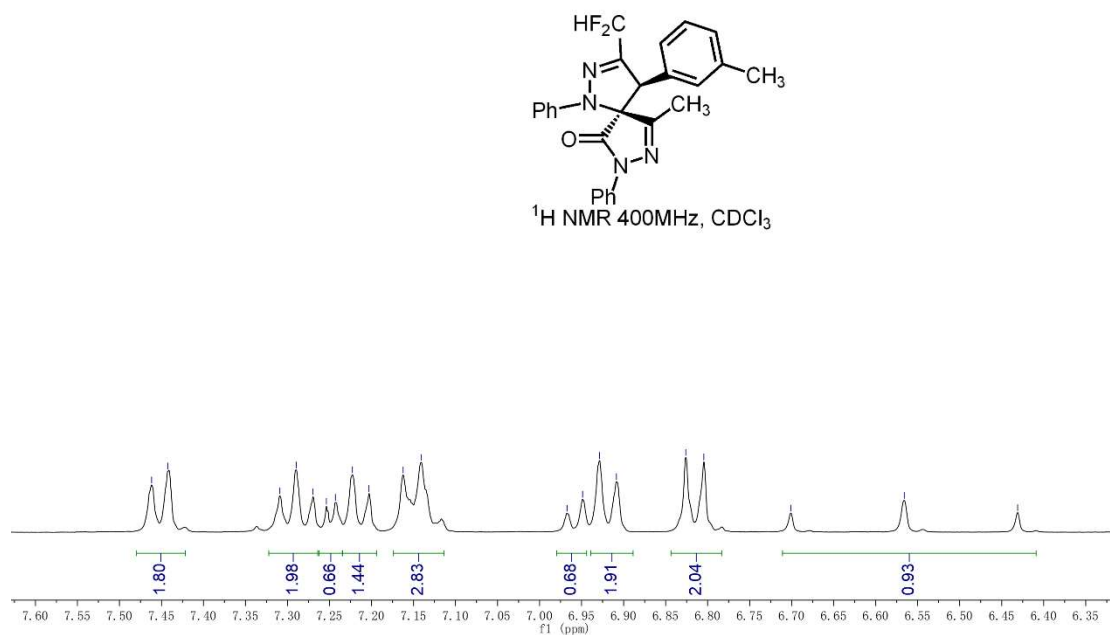



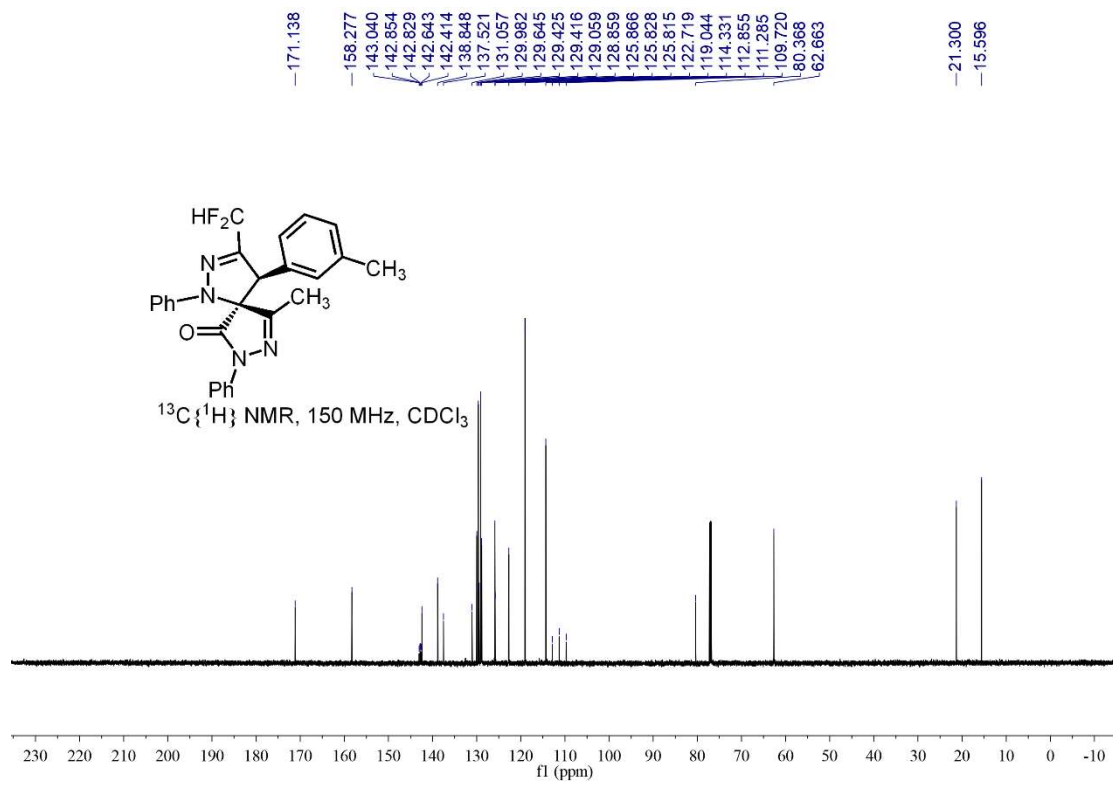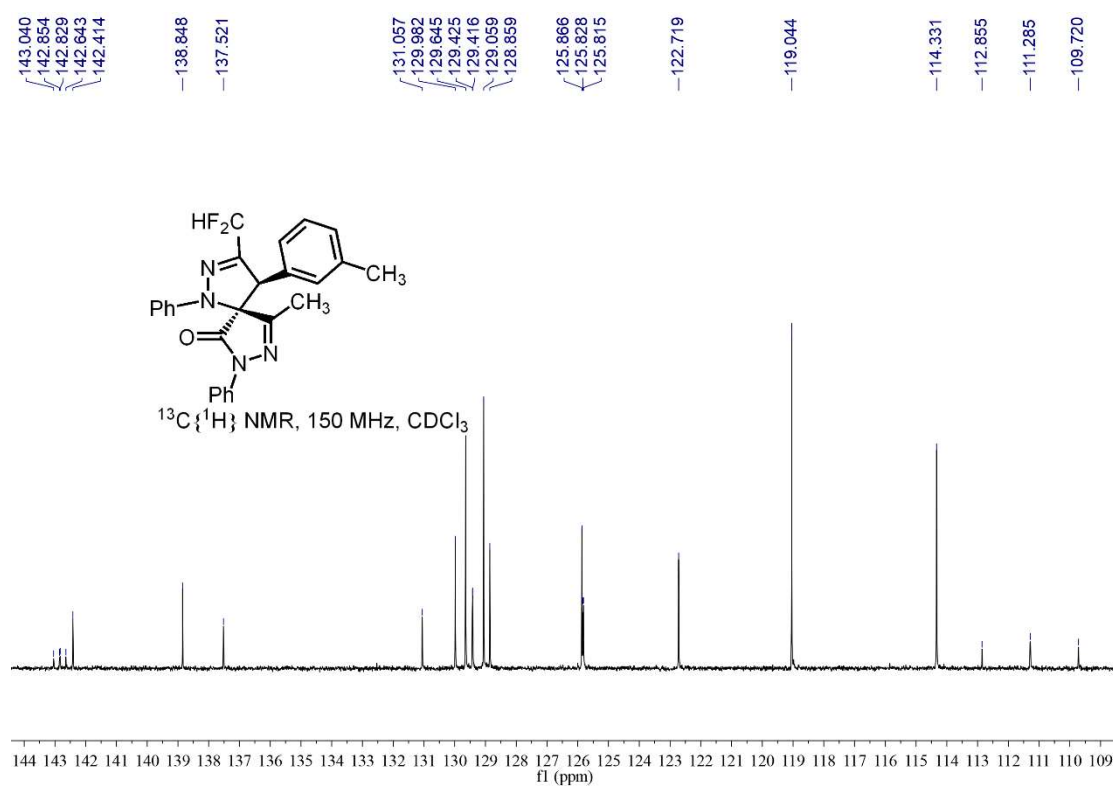

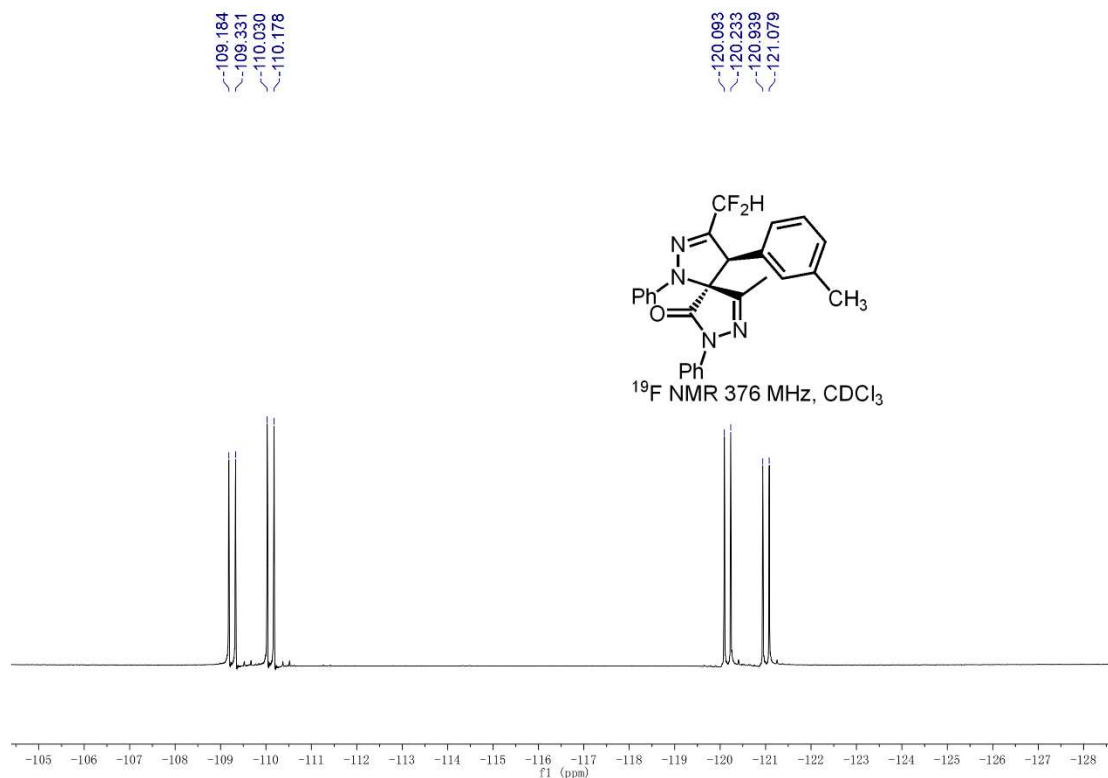

HRMS (ESI) copy of compound (*trans*)-4b:

### Mass Spectrum SmartFormula Report

#### Analysis Info

Analysis Name D:\Data\user\NWNNU-fengyang 20220707-9.d  
 Method tune\_low.m  
 Sample Name A-29  
 Comment

Acquisition Date 2022-7-7 11:35:20  
 Operator BDAL@DE  
 Instrument / Ser# micrOTOF-Q 20453

#### Acquisition Parameter

|             |          |                       |           |                  |                   |
|-------------|----------|-----------------------|-----------|------------------|-------------------|
| Source Type | ESI      | Ion Polarity          | Positive  | Set Nebulizer    | 0.4 Bar           |
| Focus       | Active   | Set Capillary         | 4500 V    | Set Dry Heater   | 180 $\mu\text{C}$ |
| Scan Begin  | 100 m/z  | Set End Plate Offset  | -500 V    | Set Dry Gas      | 4.0 l/min         |
| Scan End    | 1000 m/z | Set Collision Cell RF | 500.0 Vpp | Set Divert Valve | Waste             |

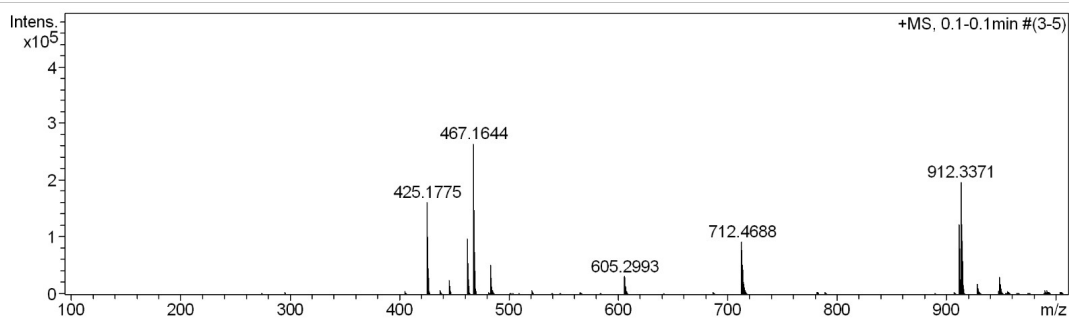

| Meas. #  | Formula                                                             | m/z      | err [ppm] | Me an err [ppm] | rdb  | N-R | e j % | Conf | mS   | ig  | ma  | Std l | Std Me an m/z | Std l Va rN or m | Std m/z Diff | Std Com b Dev |
|----------|---------------------------------------------------------------------|----------|-----------|-----------------|------|-----|-------|------|------|-----|-----|-------|---------------|------------------|--------------|---------------|
| 467.1644 | 1 C <sub>26</sub> H <sub>22</sub> F <sub>2</sub> N <sub>4</sub> NaO | 467.1654 | 2.1       | 1.2             | 16.5 | ok  | even  | 8.2  | 11.9 | 1.0 | 5.1 | 1.9   | 842.7         |                  |              |               |

NMR copies of compound (*cis*)-**4b**:

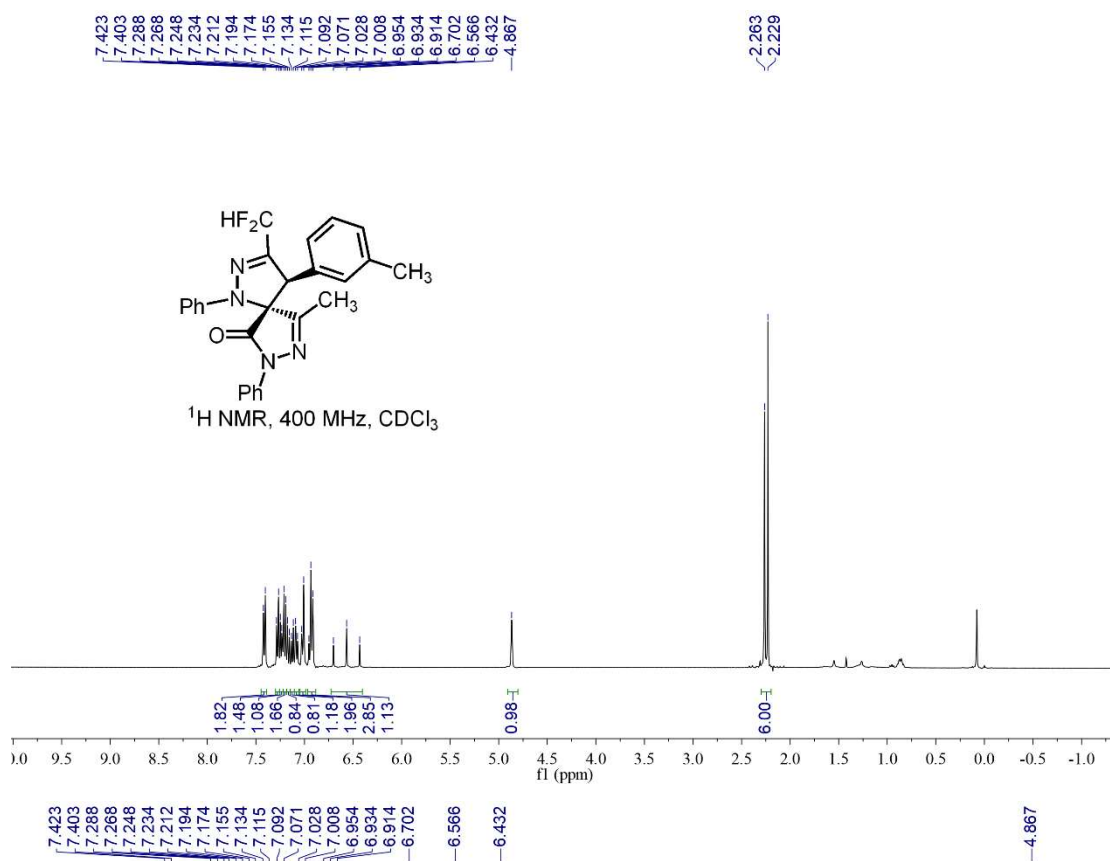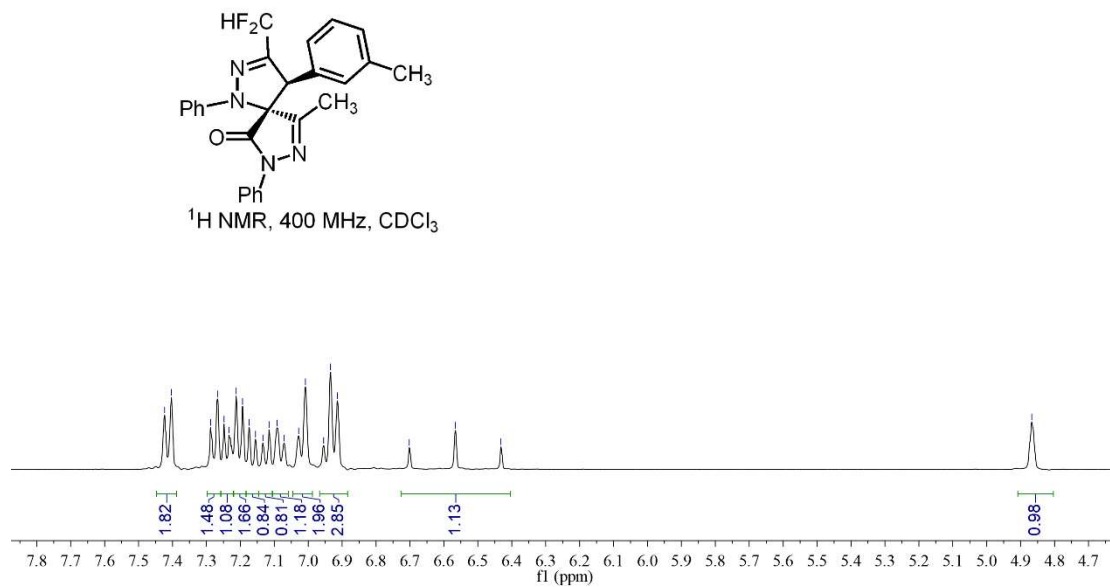

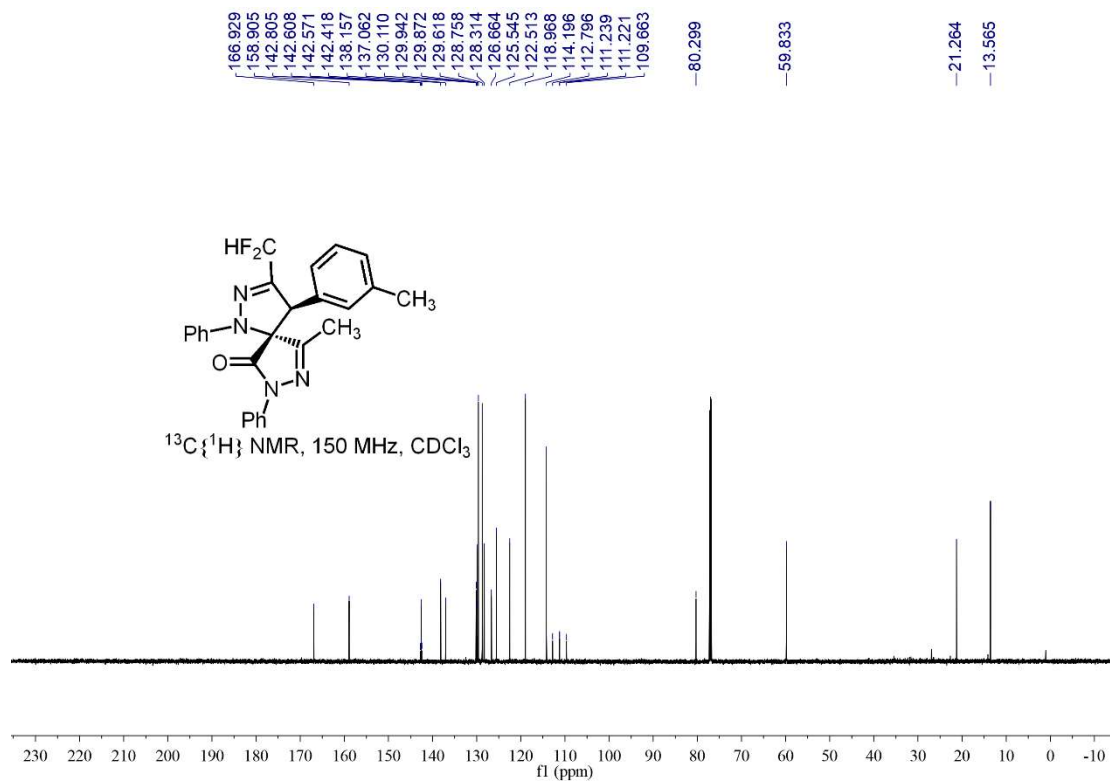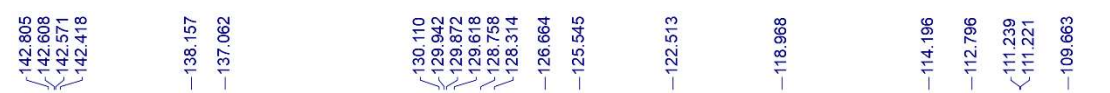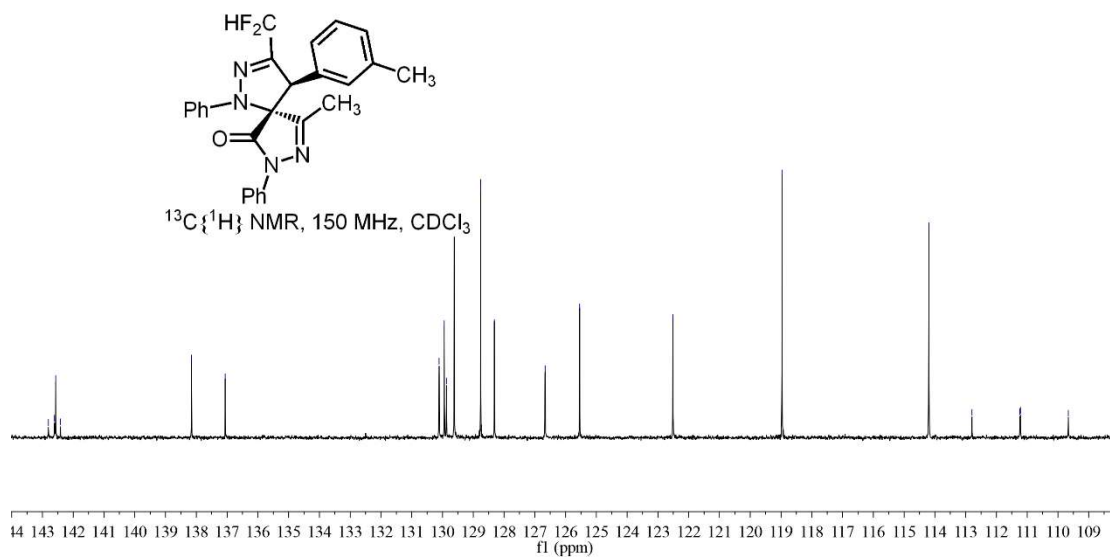

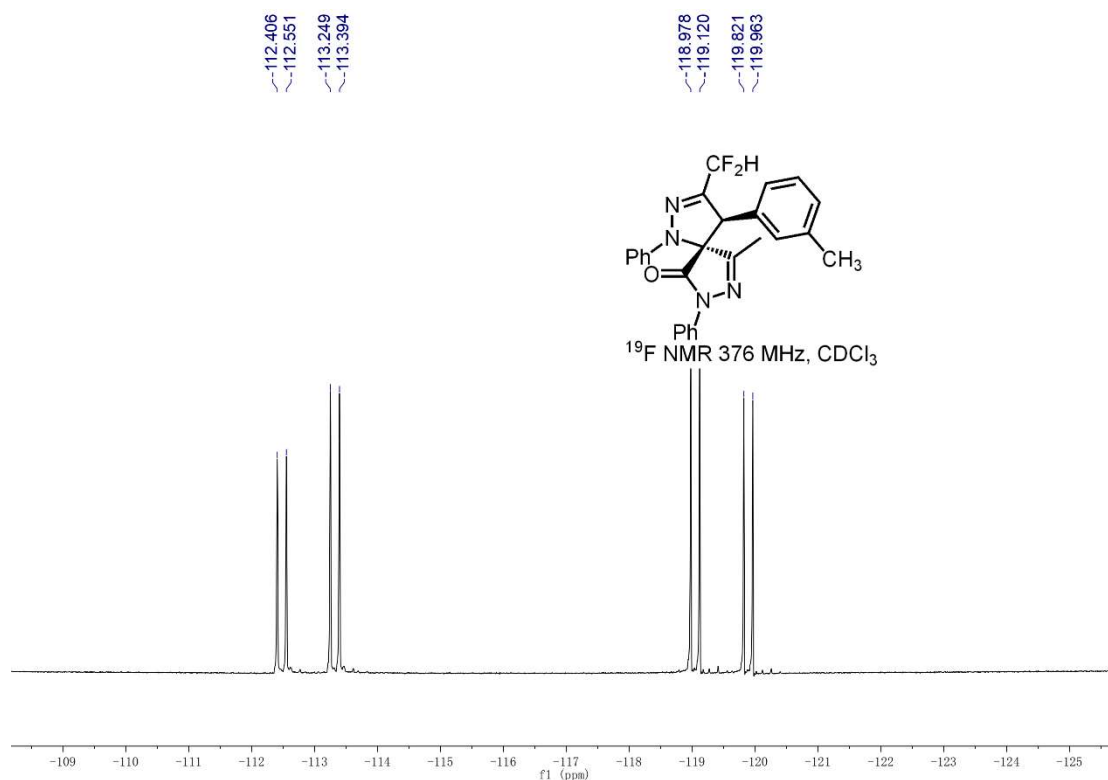

HRMS (ESI) copy of compound (*cis*)-4b:

### Mass Spectrum SmartFormula Report

#### Analysis Info

Analysis Name D:\Data\user\NWNWU-fengyang 20220707-10.d  
 Method tune\_low.m  
 Sample Name A-291  
 Comment

Acquisition Date 2022-7-7 11:36:24

Operator BDAL@DE  
 Instrument / Ser# micrOTOF-Q 20453

#### Acquisition Parameter

|             |          |                       |           |                  |           |
|-------------|----------|-----------------------|-----------|------------------|-----------|
| Source Type | ESI      | Ion Polarity          | Positive  | Set Nebulizer    | 0.4 Bar   |
| Focus       | Active   | Set Capillary         | 4500 V    | Set Dry Heater   | 180 j°C   |
| Scan Begin  | 100 m/z  | Set End Plate Offset  | -500 V    | Set Dry Gas      | 4.0 l/min |
| Scan End    | 1000 m/z | Set Collision Cell RF | 500.0 Vpp | Set Divert Valve | Waste     |

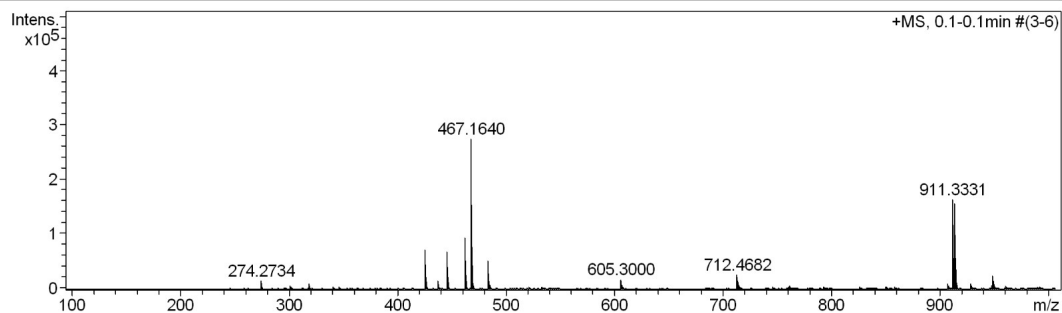

| Meas. #  | Formula                                                             | m/z      | err [ppm] | Me an err [ppm] | rdB  | N-R | ej% Conf | mSi gma | Std l | St d    | St d l   | St d     | Std Com b |
|----------|---------------------------------------------------------------------|----------|-----------|-----------------|------|-----|----------|---------|-------|---------|----------|----------|-----------|
| m/z      |                                                                     |          |           |                 |      | ul  | e        |         |       | Me an z | Val or m | m/ Dif f | Dev       |
| 467.1640 | 1 C <sub>26</sub> H <sub>22</sub> F <sub>2</sub> N <sub>4</sub> NaO | 467.1654 | 2.9       | 2.2             | 16.5 | ok  | even     | 10.7    | 15.8  | 1.2     | 6.7      | 1.6      | 842.7     |

NMR copies of compound (*trans*)-4c:

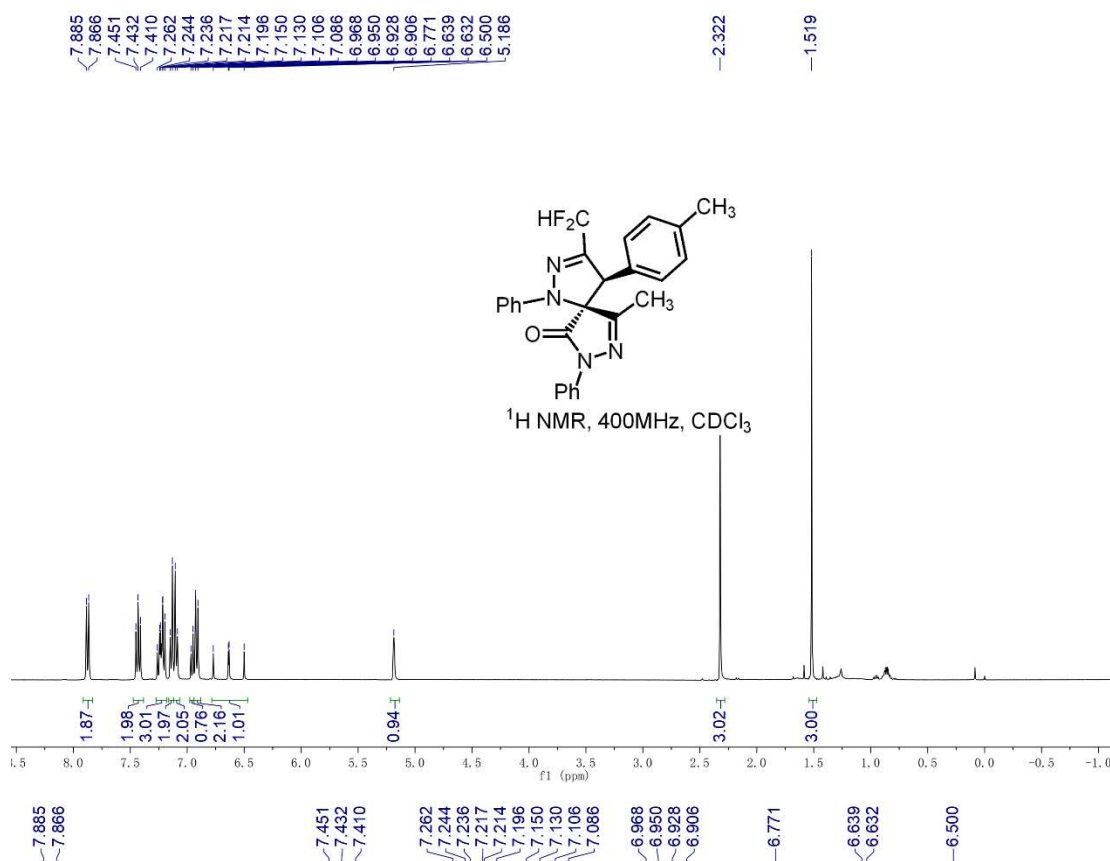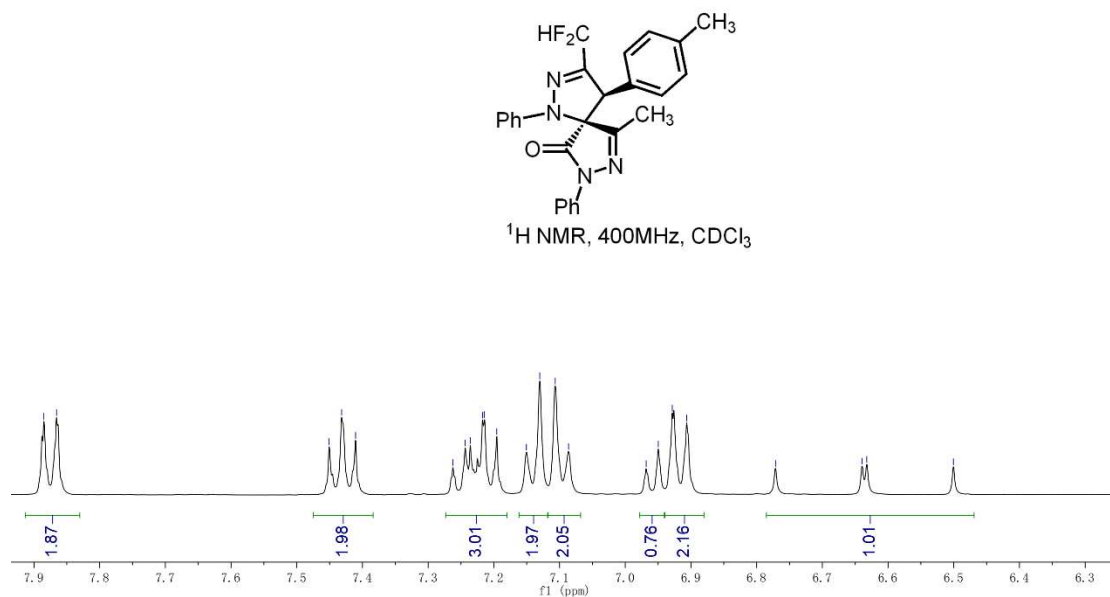

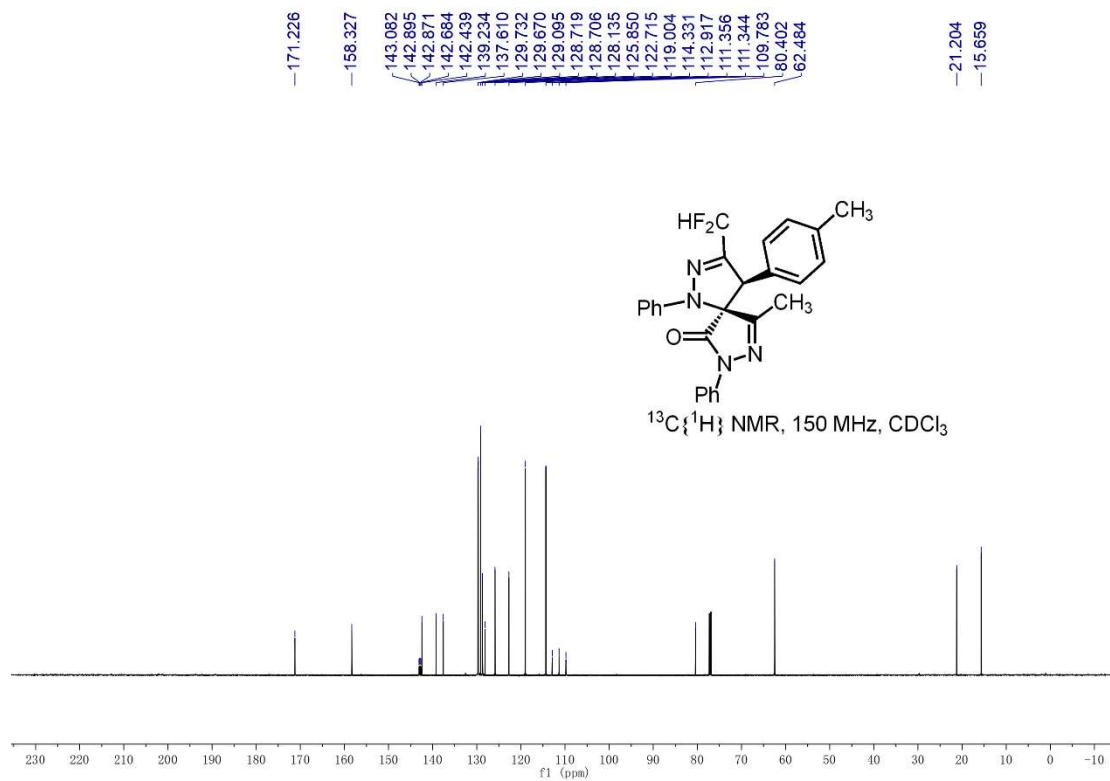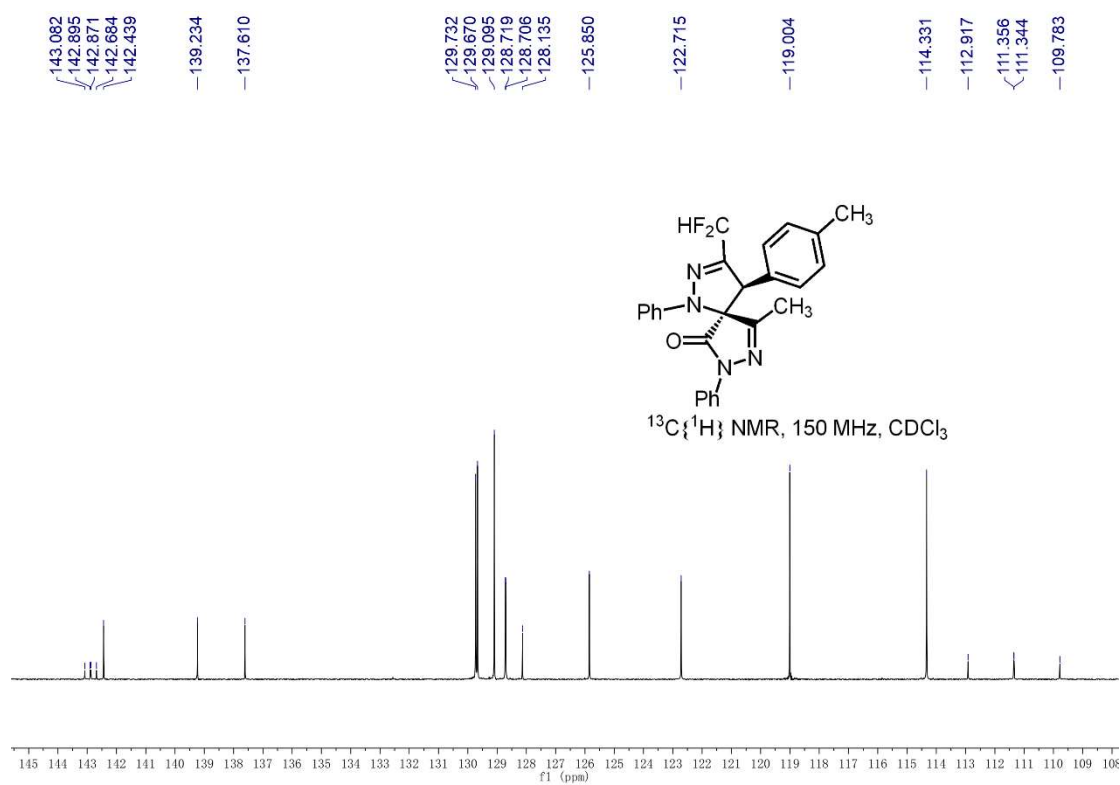

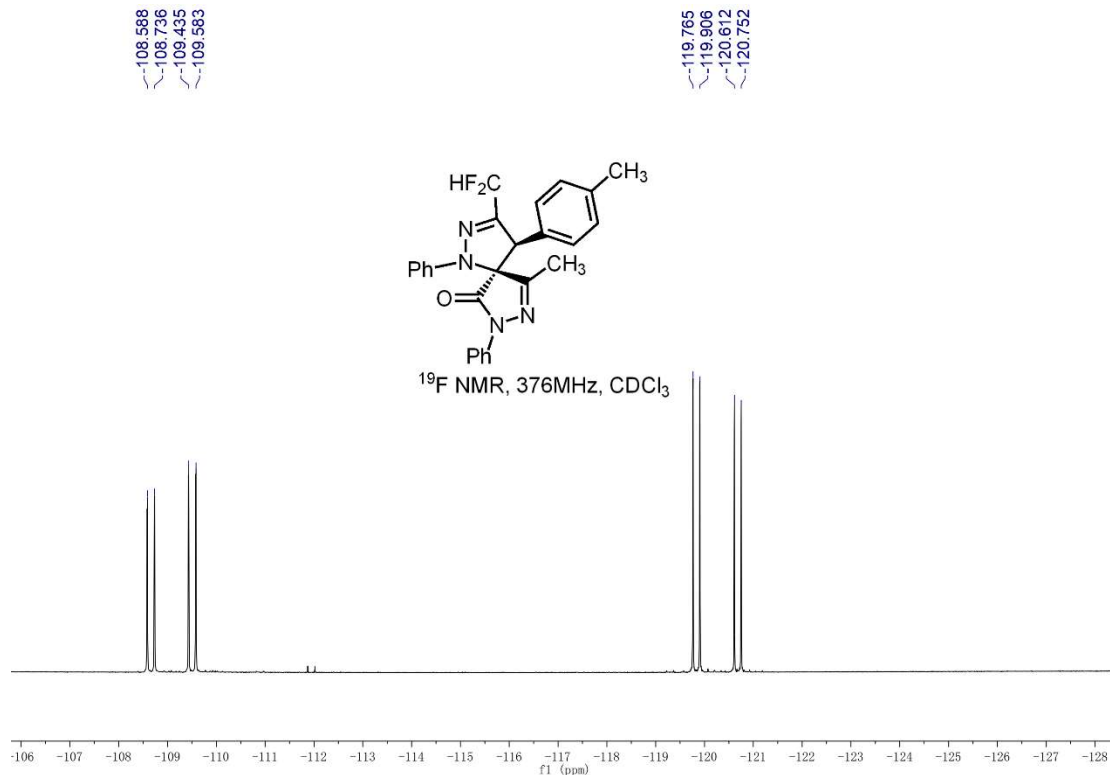

HRMS (ESI) copy of compound (*trans*)-4c:

### Mass Spectrum SmartFormula Report

**Analysis Info**

Analysis Name D:\Data\user\NWN\U-fengyang 20230321-4.d  
 Method tune\_low.m  
 Sample Name A-28  
 Comment

Acquisition Date 2023-3-21 15:35:55  
 Operator BDAL@DE  
 Instrument / Ser# micrOTOF-Q 20453

**Acquisition Parameter**

|             |          |                       |           |                  |           |
|-------------|----------|-----------------------|-----------|------------------|-----------|
| Source Type | ESI      | Ion Polarity          | Positive  | Set Nebulizer    | 0.4 Bar   |
| Focus       | Active   | Set Capillary         | 4500 V    | Set Dry Heater   | 180 j°C   |
| Scan Begin  | 50 m/z   | Set End Plate Offset  | -500 V    | Set Dry Gas      | 4.0 l/min |
| Scan End    | 1000 m/z | Set Collision Cell RF | 300.0 Vpp | Set Divert Valve | Waste     |

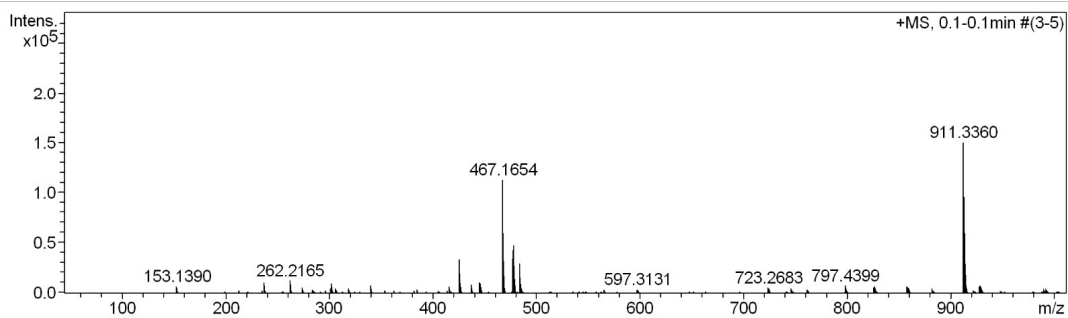

| Meas. #  | Formula | m/z                                                               | err [ppm] | Me an err [ppm] | rdb | N-R  | ej% Conf | mS   | Std | Std | Std | Std  | Std |       |
|----------|---------|-------------------------------------------------------------------|-----------|-----------------|-----|------|----------|------|-----|-----|-----|------|-----|-------|
| m/z      |         |                                                                   |           |                 |     |      |          |      | l   | Me  | l   | m/   | Com |       |
|          |         |                                                                   |           |                 |     |      |          |      |     | an  | Val | z    | Dev |       |
|          |         |                                                                   |           |                 |     |      |          |      |     | m/  | rN  | Diff |     |       |
|          |         |                                                                   |           |                 |     |      |          |      |     | z   | or  |      |     |       |
|          |         |                                                                   |           |                 |     |      |          |      |     | m   |     |      |     |       |
| 467.1654 | 1       | C <sub>26</sub> H <sub>22</sub> F <sub>2</sub> N <sub>4</sub> NaO | 467.1654  | 0.0             | 0.0 | 16.5 | ok       | even | 4.9 | 6.2 | 0.1 | 3.9  | 0.1 | 842.7 |



NMR copies of compound (*cis*)-4c:

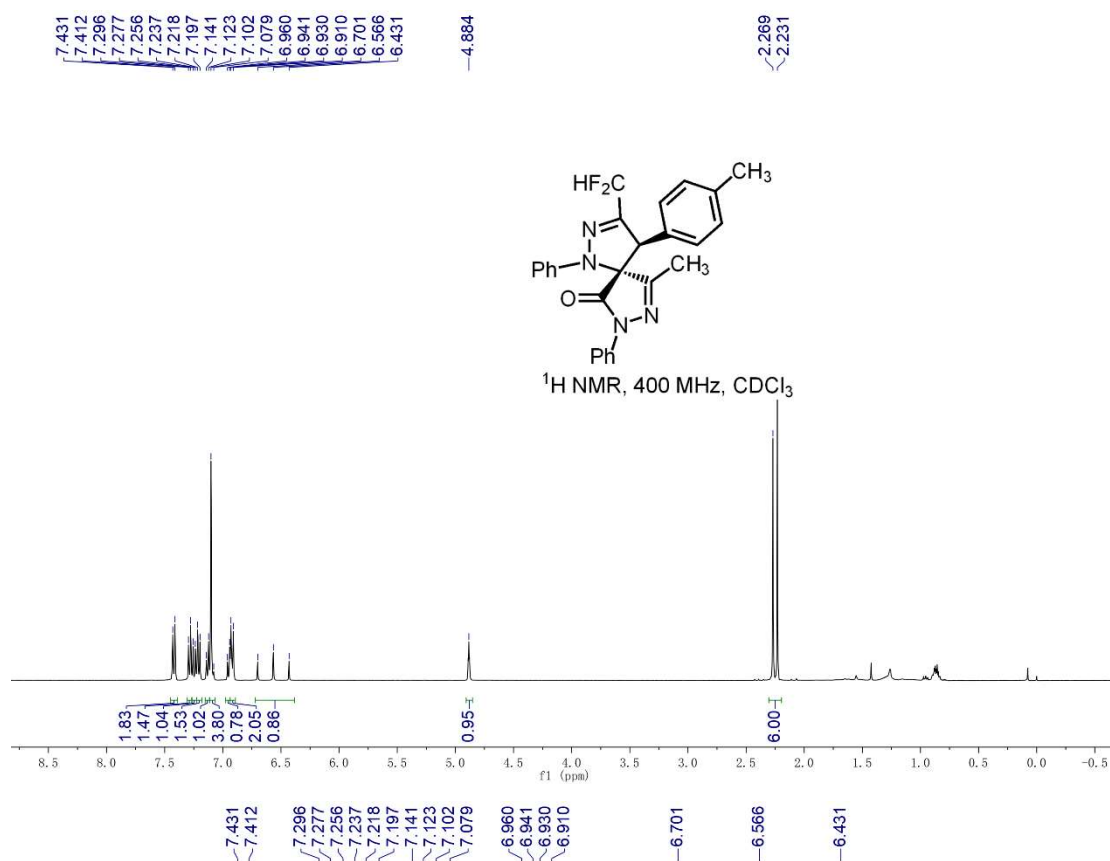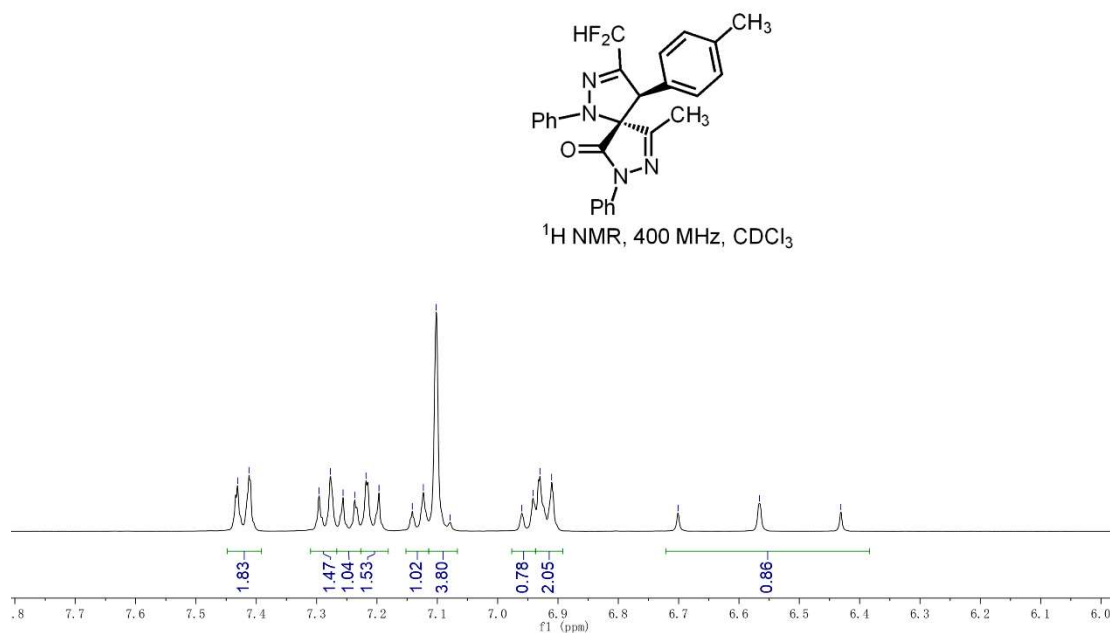

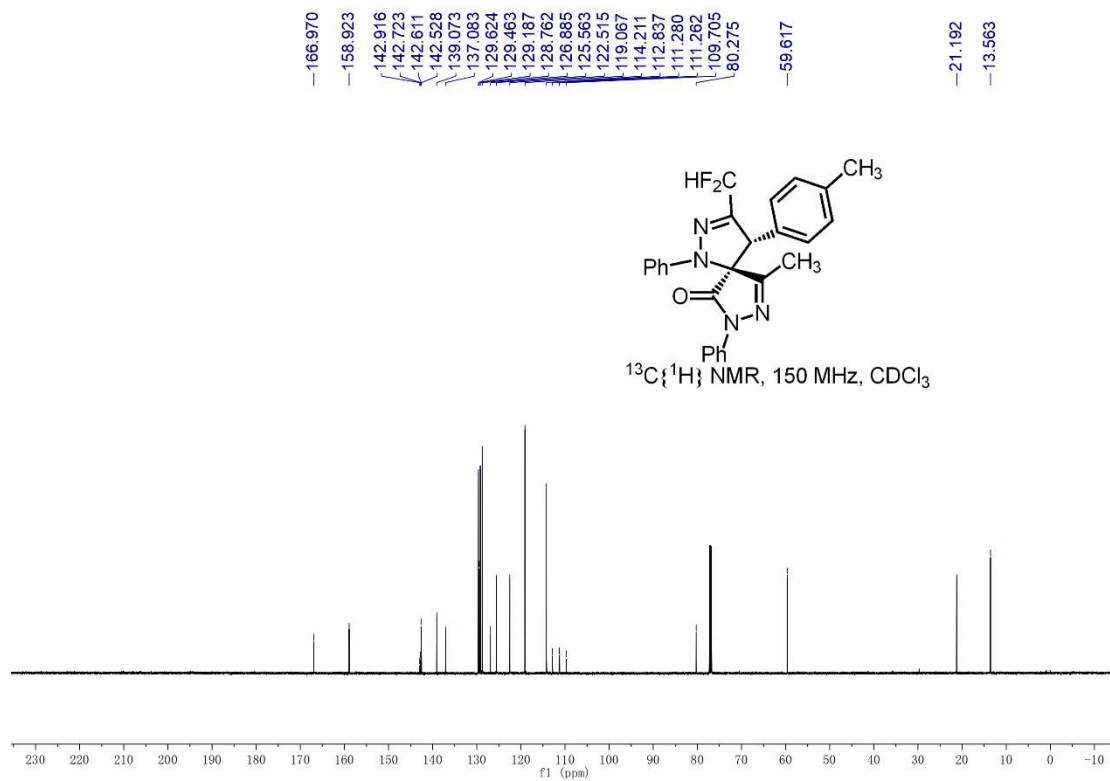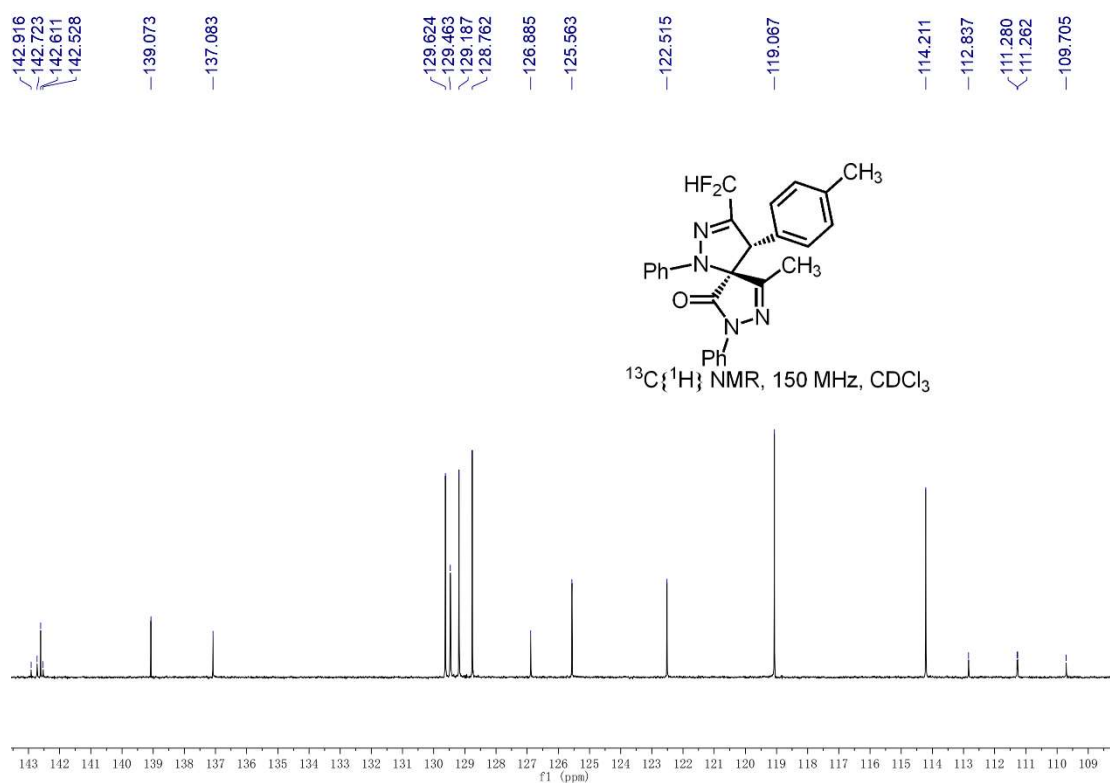

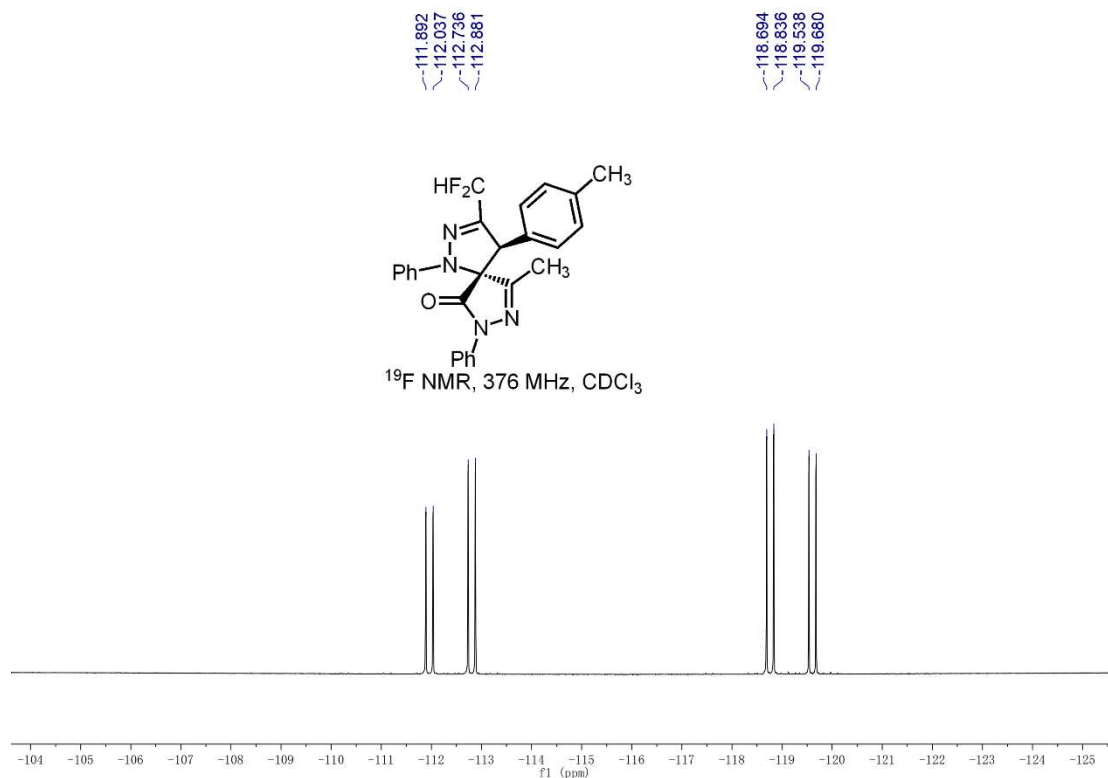

HRMS (ESI) copy of compound (*cis*)-4c:

### Mass Spectrum SmartFormula Report

**Analysis Info**

Analysis Name D:\Data\user\NWNWU-fengyang 20230321-5.d  
 Method tune\_low.m  
 Sample Name A-281  
 Comment

Acquisition Date 2023-3-21 15:37:20

Operator BDAL@DE  
 Instrument / Ser# micrOTOF-Q 20453

**Acquisition Parameter**

|             |          |                       |           |                  |           |
|-------------|----------|-----------------------|-----------|------------------|-----------|
| Source Type | ESI      | Ion Polarity          | Positive  | Set Nebulizer    | 0.4 Bar   |
| Focus       | Active   | Set Capillary         | 4500 V    | Set Dry Heater   | 180 j°C   |
| Scan Begin  | 50 m/z   | Set End Plate Offset  | -500 V    | Set Dry Gas      | 4.0 l/min |
| Scan End    | 1000 m/z | Set Collision Cell RF | 300.0 Vpp | Set Divert Valve | Waste     |

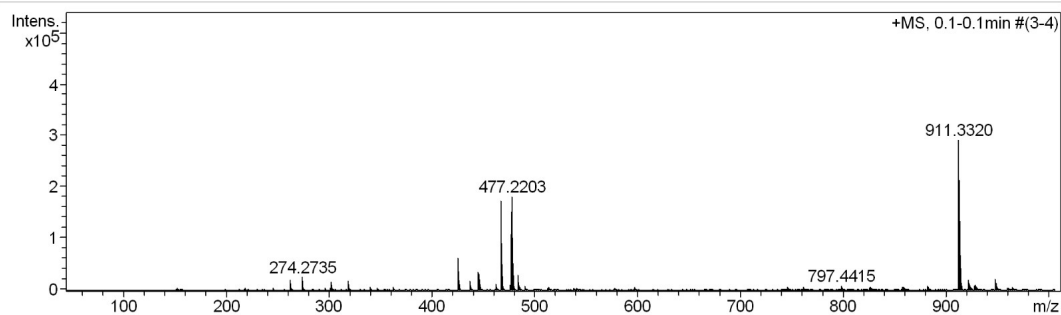

| Meas. m/z | # | Formula                | m/z      | err [ppm] | Me an err [ppm] | rdb  | N- R | e;# Conf | mS ig ma | Std l | Std Me an z | Std l Va rN or m | Std m/ z Diff | Std Com b Dev |
|-----------|---|------------------------|----------|-----------|-----------------|------|------|----------|----------|-------|-------------|------------------|---------------|---------------|
| 467.1648  | 1 | C 26 H 22 F 2 N 4 Na O | 467.1654 | 1.2       | 0.7             | 16.5 | ok   | even     | 4.5      | 5.7   | 0.5         | 3.2              | 1.1           | 842.7         |

NMR copies of compound (*trans*)-4d:

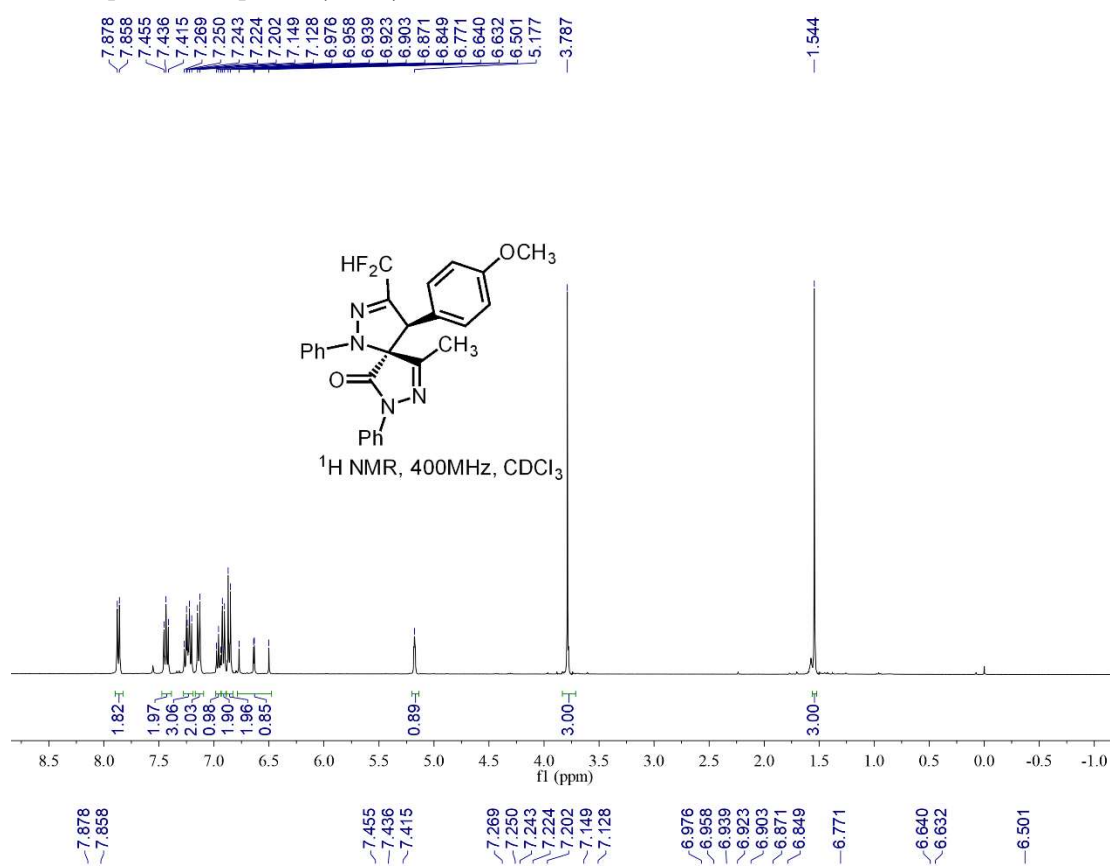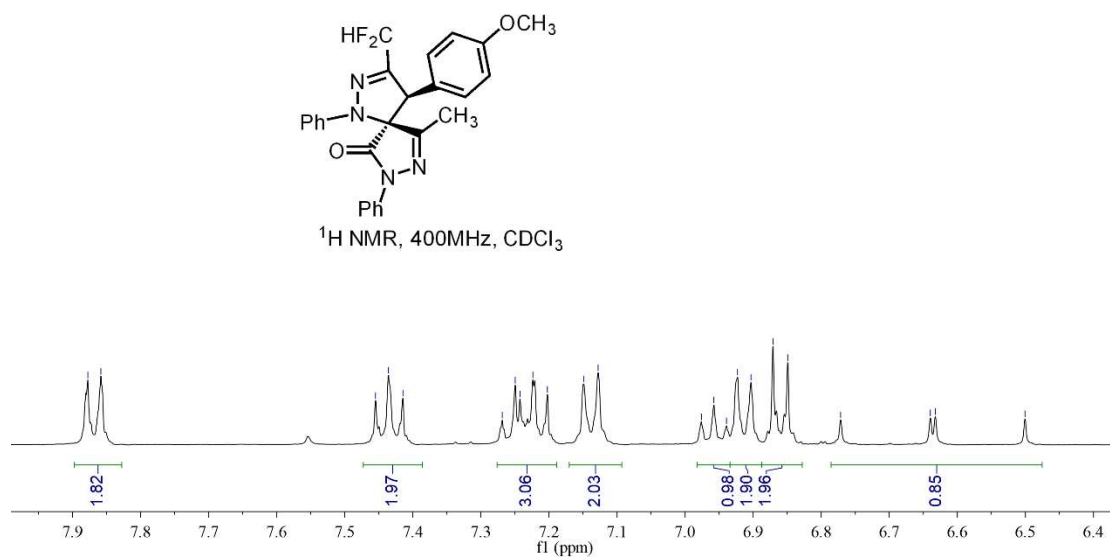

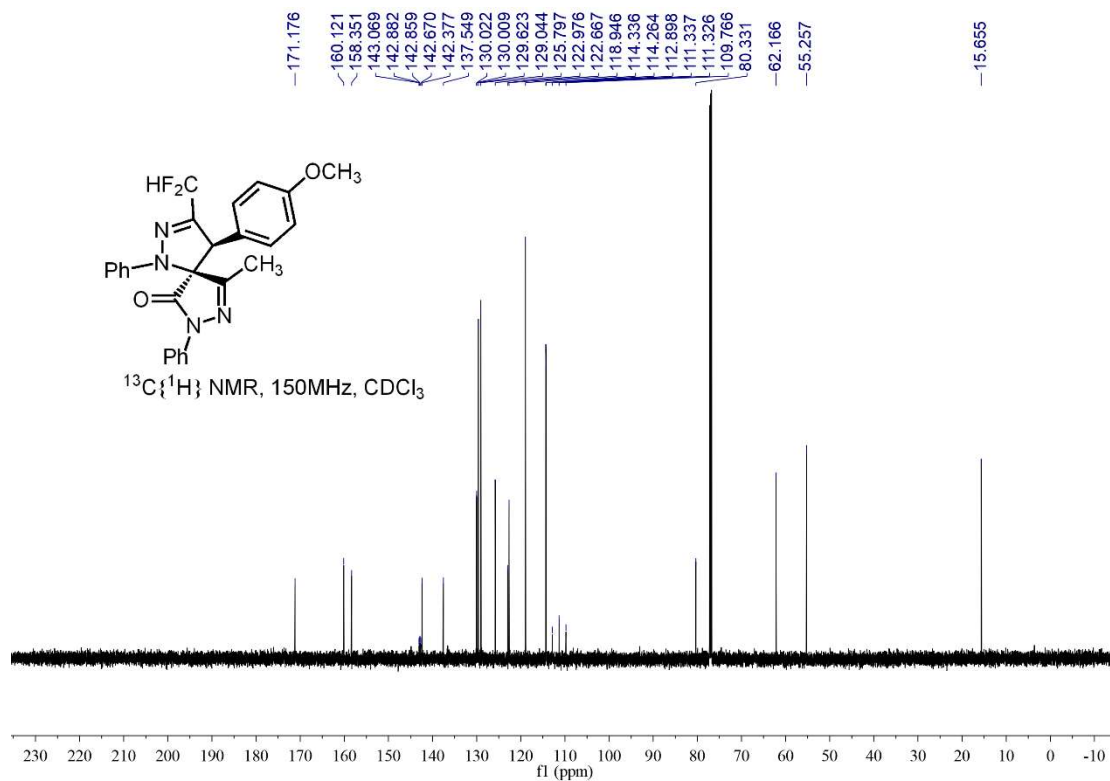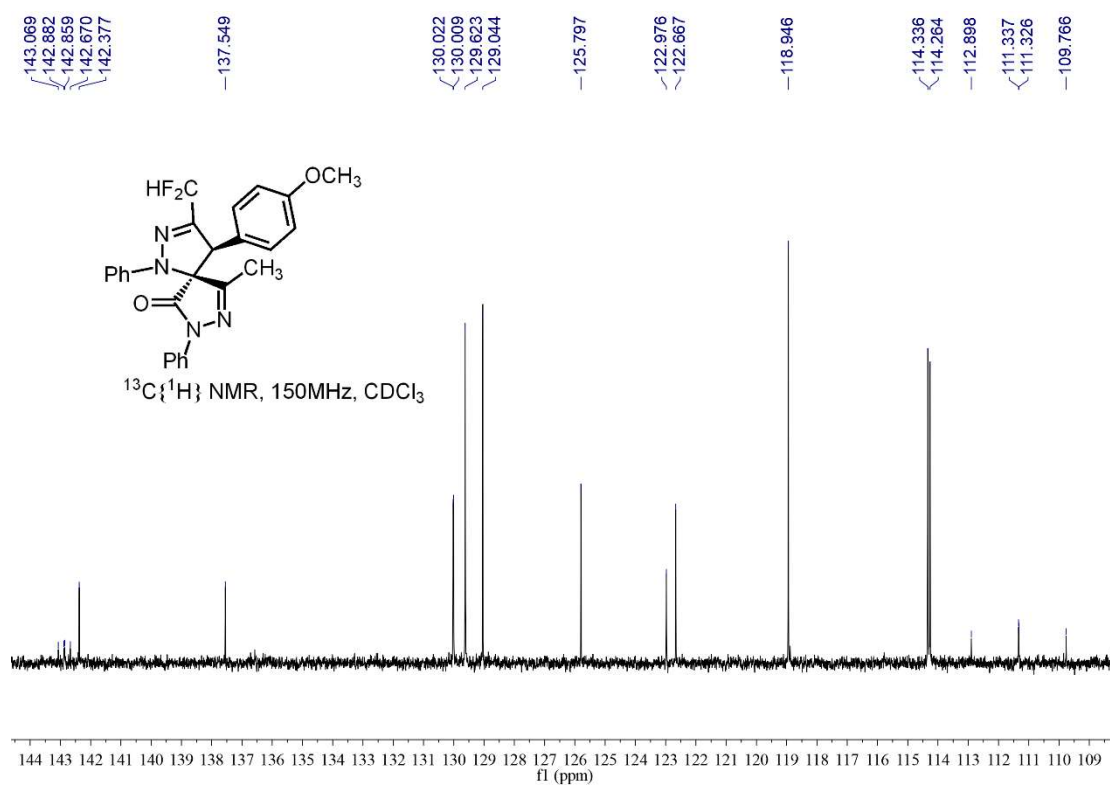



NMR copies of compound (*cis*)-4d:

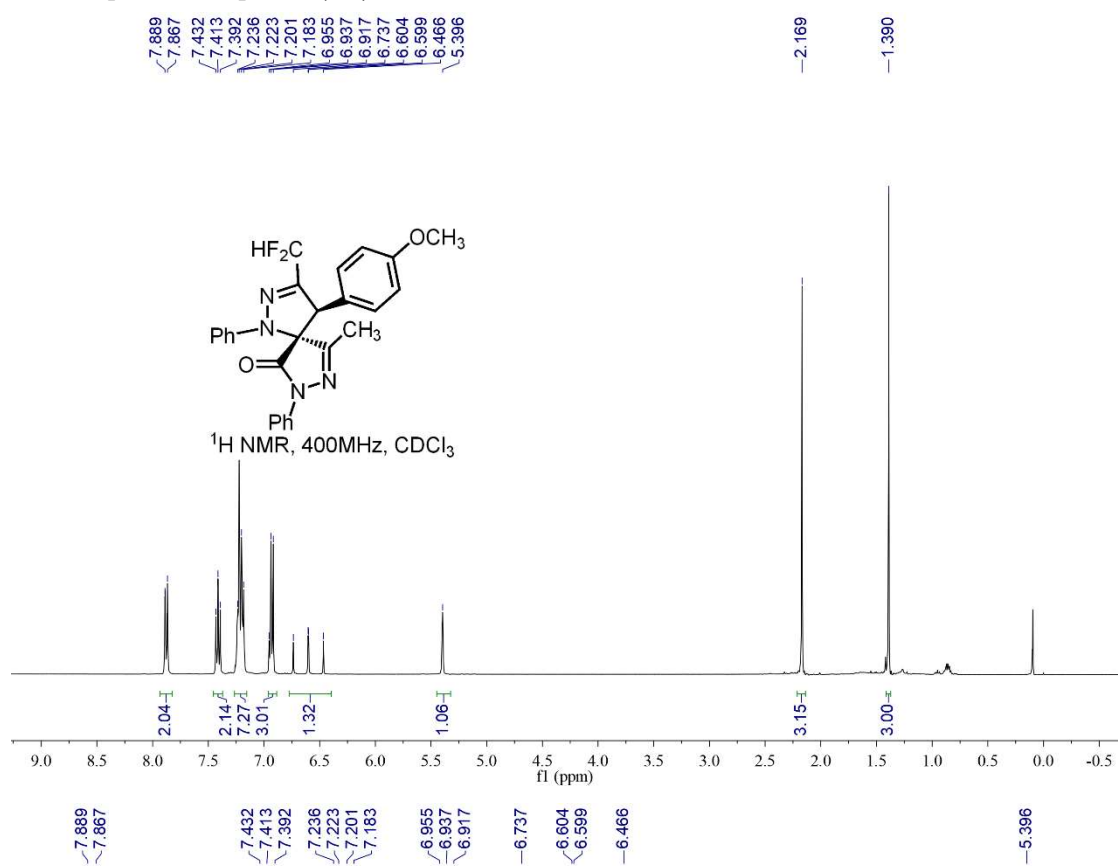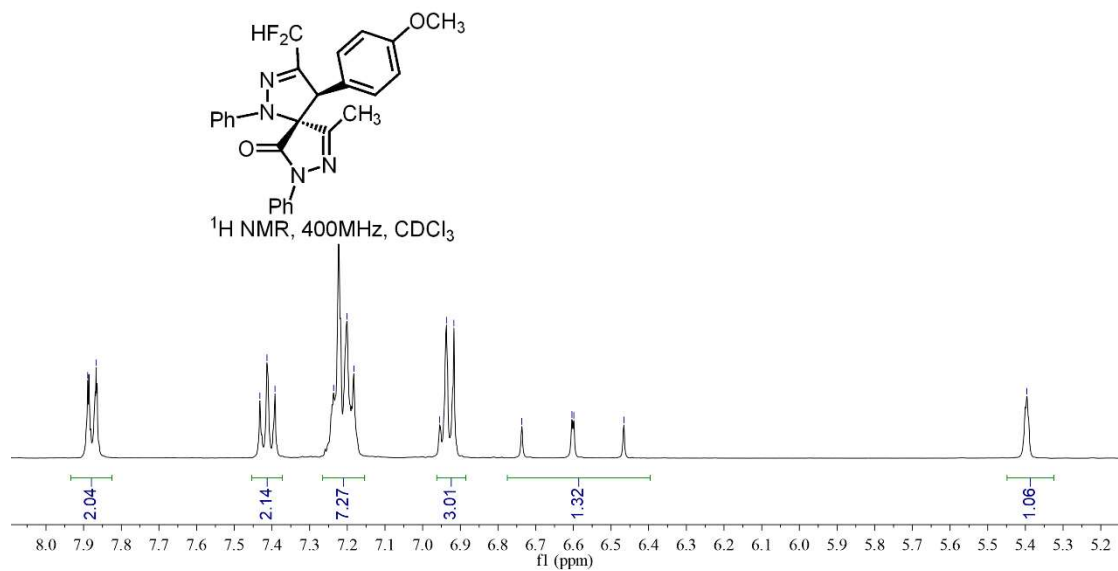

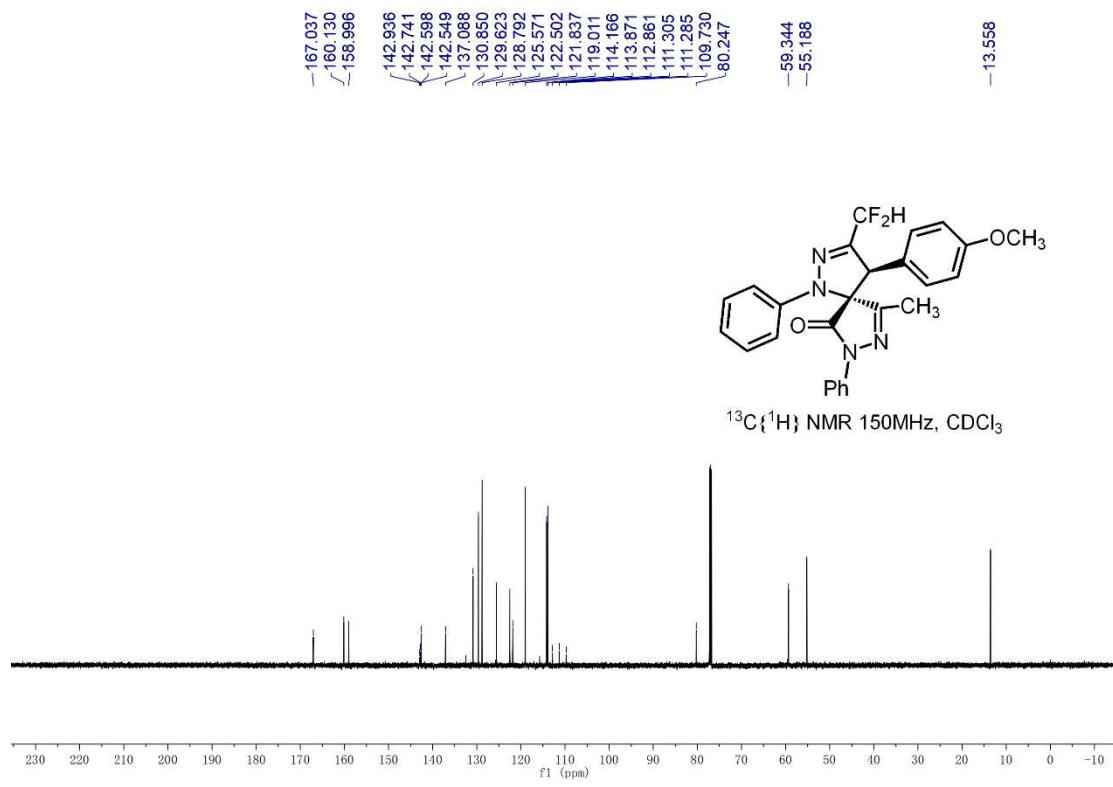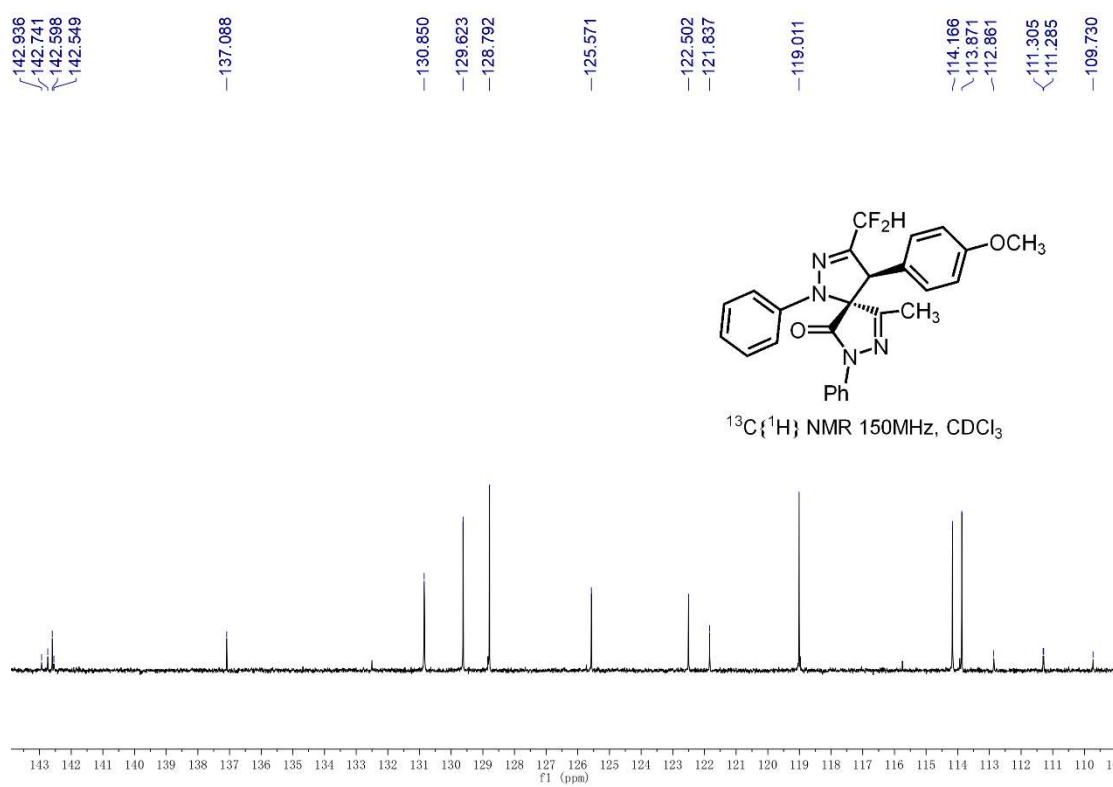



~110.383  
~110.529  
~111.225  
~111.371

~119.553  
~119.693  
~120.394  
~120.535

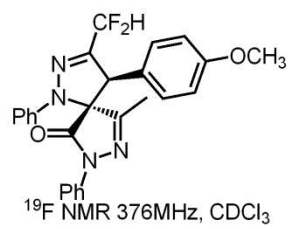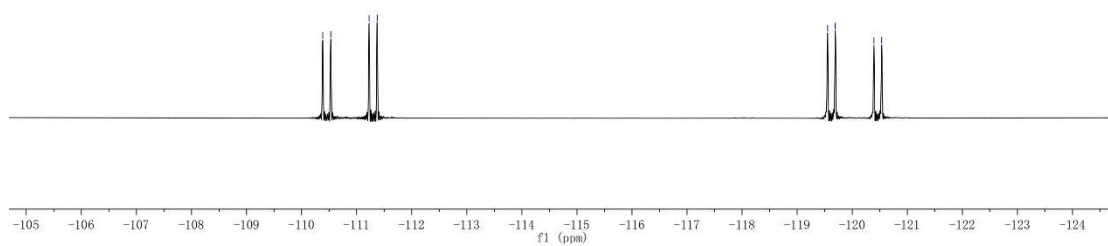

# HRMS (ESI) copy of compound (*cis*)-4d:

G:\HYL-FENGYANG-A-241

03/29/23 17:07:05

HYL-FENGYANG-A-241#36-88 RT: 0.16-0.39 AV: 53 NL: 3.04E8

T: FTMS + p ESI Full lock ms [60.0000-750.0000]

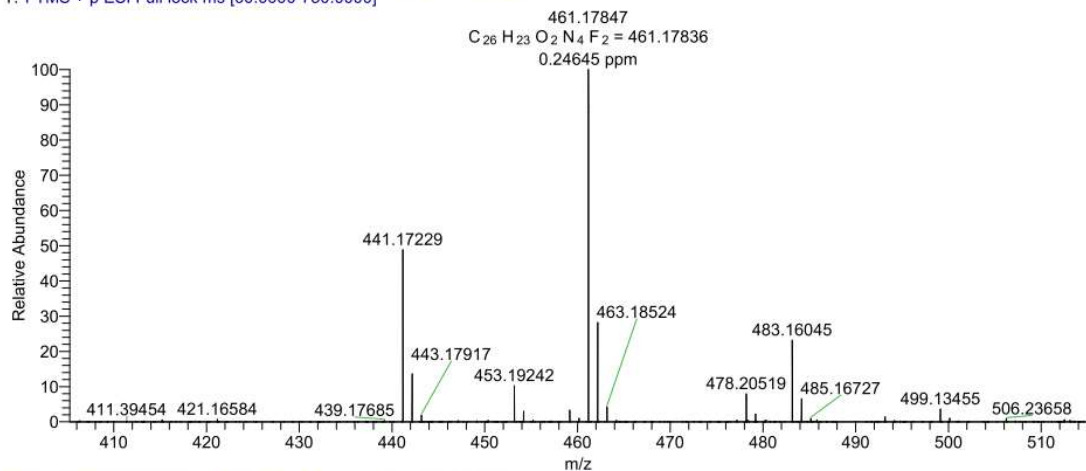

HYL-FENGYANG-A-241#36-88 RT: 0.16-0.39 AV: 53

T: FTMS + p ESI Full lock ms [60.0000-750.0000]

m/z = 405.24017-514.89430

| m/z       | Intensity   | Relative | Theo. Mass | Delta (ppm) | Composition                                                                  |
|-----------|-------------|----------|------------|-------------|------------------------------------------------------------------------------|
| 441.17229 | 149043664.0 | 48.68    |            |             |                                                                              |
| 442.17581 | 41409804.0  | 13.52    |            |             |                                                                              |
| 461.17847 | 306196384.0 | 100.00   | 461.17836  | 0.11        | C <sub>26</sub> H <sub>23</sub> O <sub>2</sub> N <sub>4</sub> F <sub>2</sub> |
| 462.18201 | 86076024.0  | 28.11    |            |             |                                                                              |
| 483.16045 | 70750096.0  | 23.11    |            |             |                                                                              |

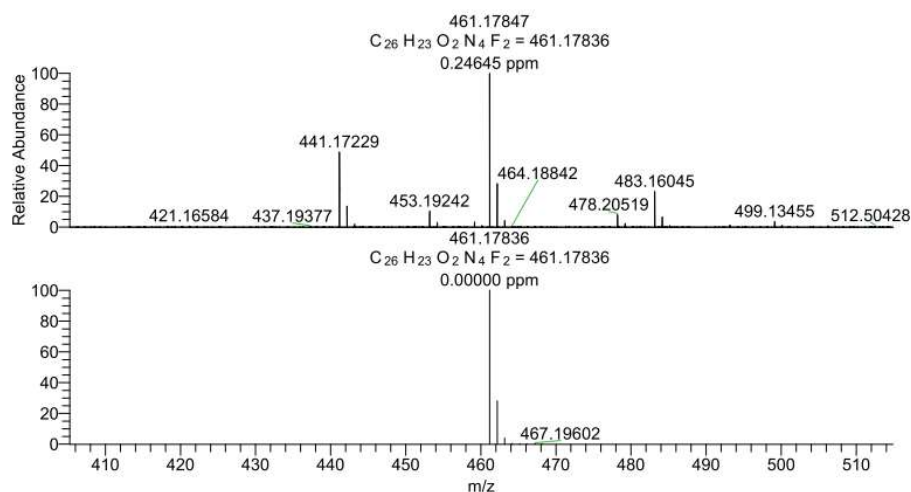

NL:  
3.04E8  
HYL-FENGYANG-A-  
241#36-88 RT:  
0.16-0.39 AV: 53 T:  
FTMS + p ESI Full lock  
ms [60.0000-750.0000]

NL:  
7.39E5  
C<sub>26</sub>H<sub>23</sub>F<sub>2</sub>N<sub>4</sub>O<sub>2</sub>:  
C<sub>26</sub>H<sub>23</sub>F<sub>2</sub>N<sub>4</sub>O<sub>2</sub>  
pa Chrg 1

NMR copies of compound (*trans*)-4e:

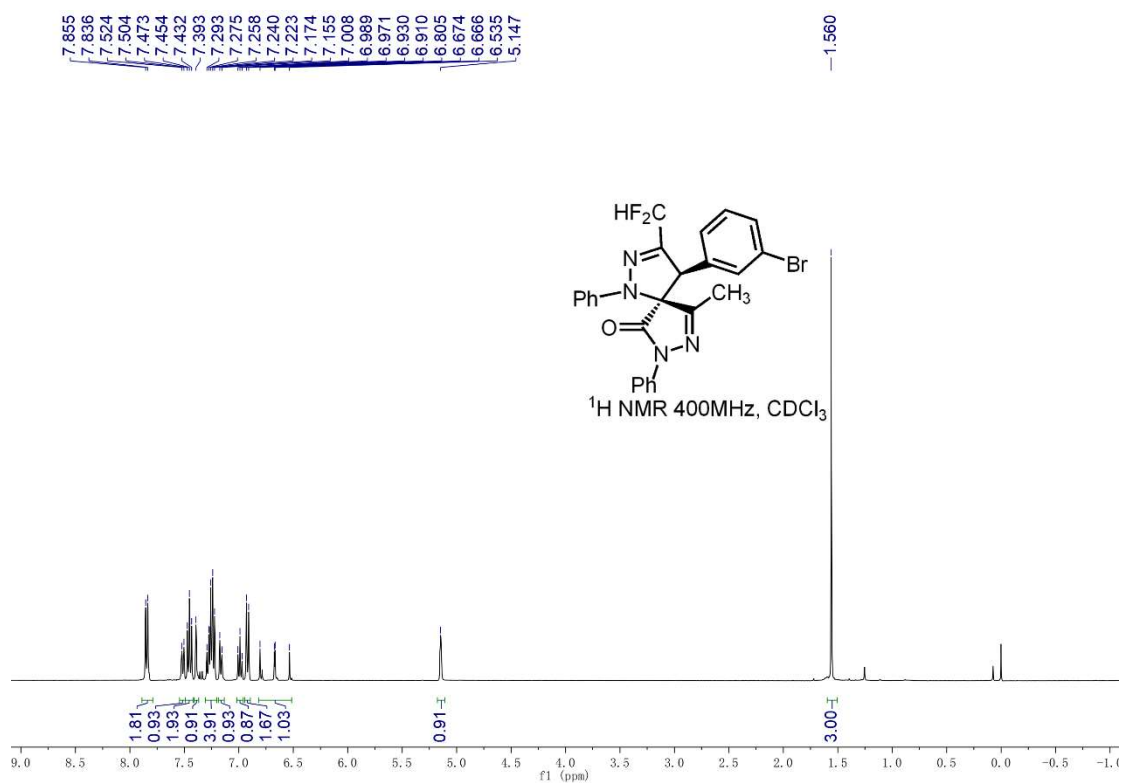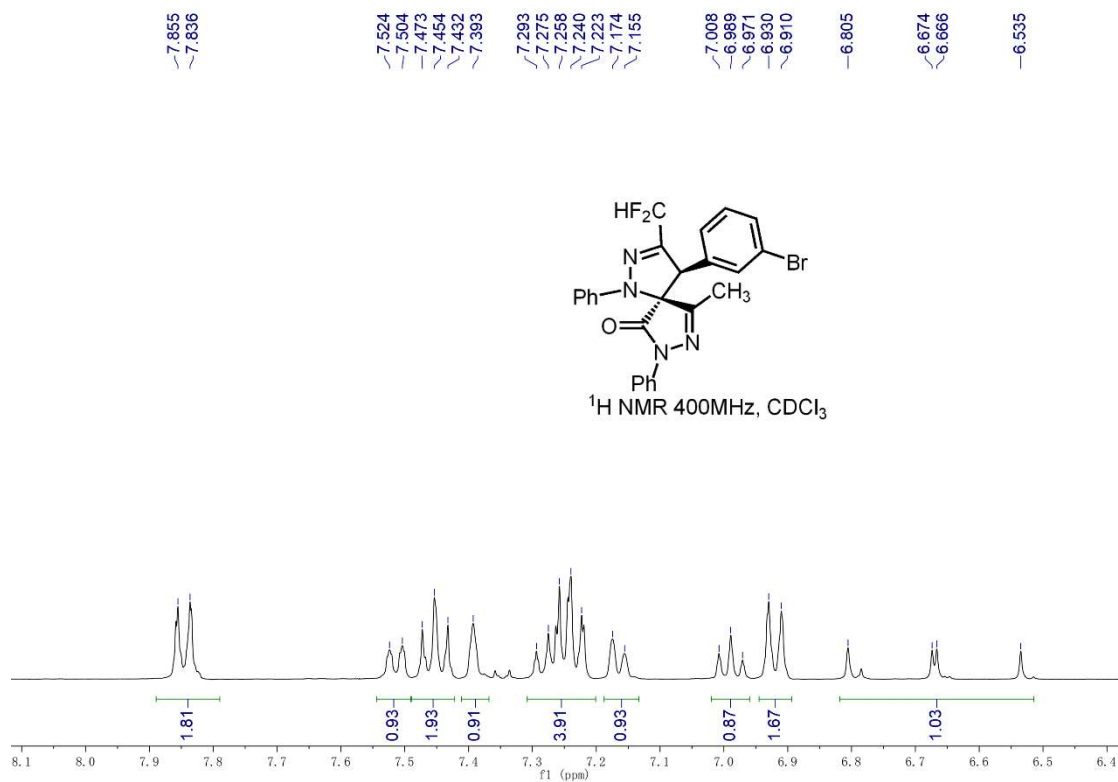

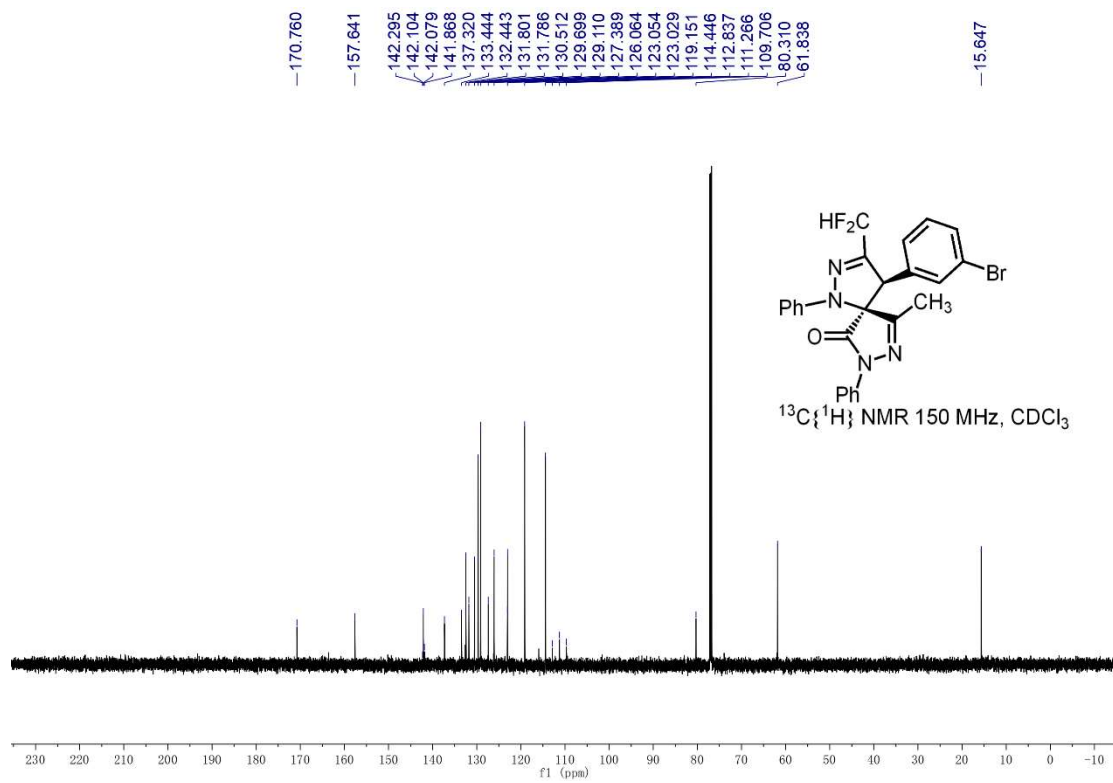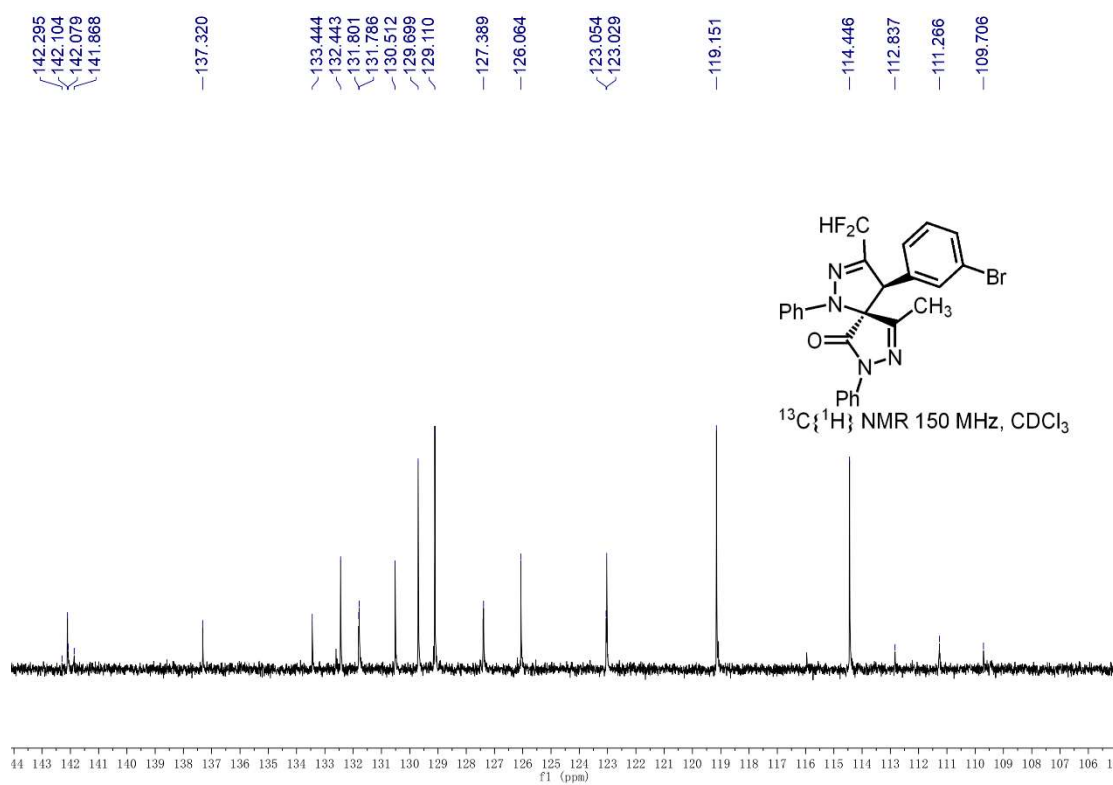

-108.317  
-108.465  
-109.167  
-109.315

-119.422  
-119.561  
-120.272  
-120.411

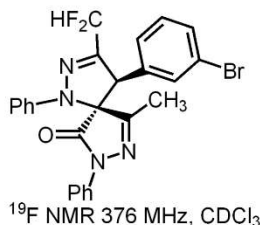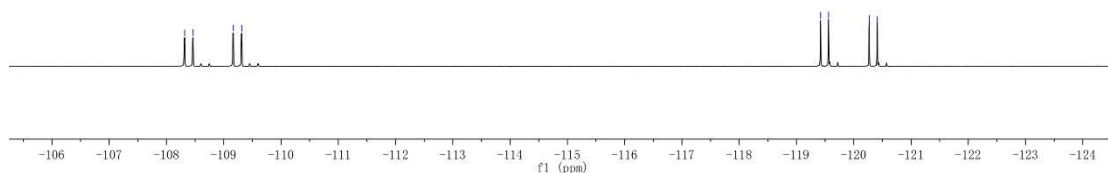

HRMS (ESI) copy of compound (*trans*)-4e:

### Mass Spectrum SmartFormula Report

#### Analysis Info

Analysis Name D:\Data\user\NWNWU-fengyang 20230321-6.d  
Method tune\_low.m  
Sample Name A-52  
Comment

Acquisition Date 2023-3-21 15:38:53

Operator BDAL@DE  
Instrument / Ser# micrOTOF-Q 20453

#### Acquisition Parameter

|             |          |                       |           |                  |           |
|-------------|----------|-----------------------|-----------|------------------|-----------|
| Source Type | ESI      | Ion Polarity          | Positive  | Set Nebulizer    | 0.4 Bar   |
| Focus       | Active   | Set Capillary         | 4500 V    | Set Dry Heater   | 180 j̄C   |
| Scan Begin  | 50 m/z   | Set End Plate Offset  | -500 V    | Set Dry Gas      | 4.0 l/min |
| Scan End    | 1000 m/z | Set Collision Cell RF | 300.0 Vpp | Set Divert Valve | Waste     |

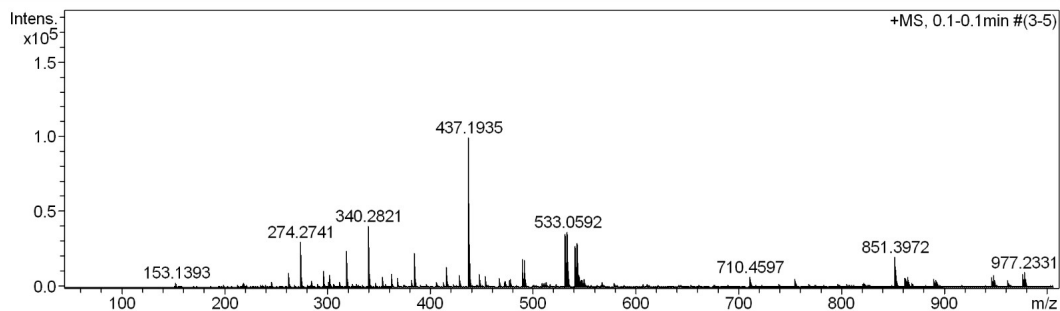

| Meas. #  | Formula                                                               | m/z      | err [ppm] | Me an err [ppm] | rdb  | N- ul e | e; Con f | mSi gm a | Std l | St d M ea n m/z | St d Va r m | St d m/ z | Std Com b Dev |
|----------|-----------------------------------------------------------------------|----------|-----------|-----------------|------|---------|----------|----------|-------|-----------------|-------------|-----------|---------------|
| 531.0603 | 1 C <sub>25</sub> H <sub>19</sub> BrF <sub>2</sub> N <sub>4</sub> NaO | 531.0603 | -0.1      | -0.9            | 16.5 | ok      | even     | 17.7     | 17.2  | 1.1             | 6.4         | 1.0       | 842.7         |

NMR copies of compound (*cis*)-4e:

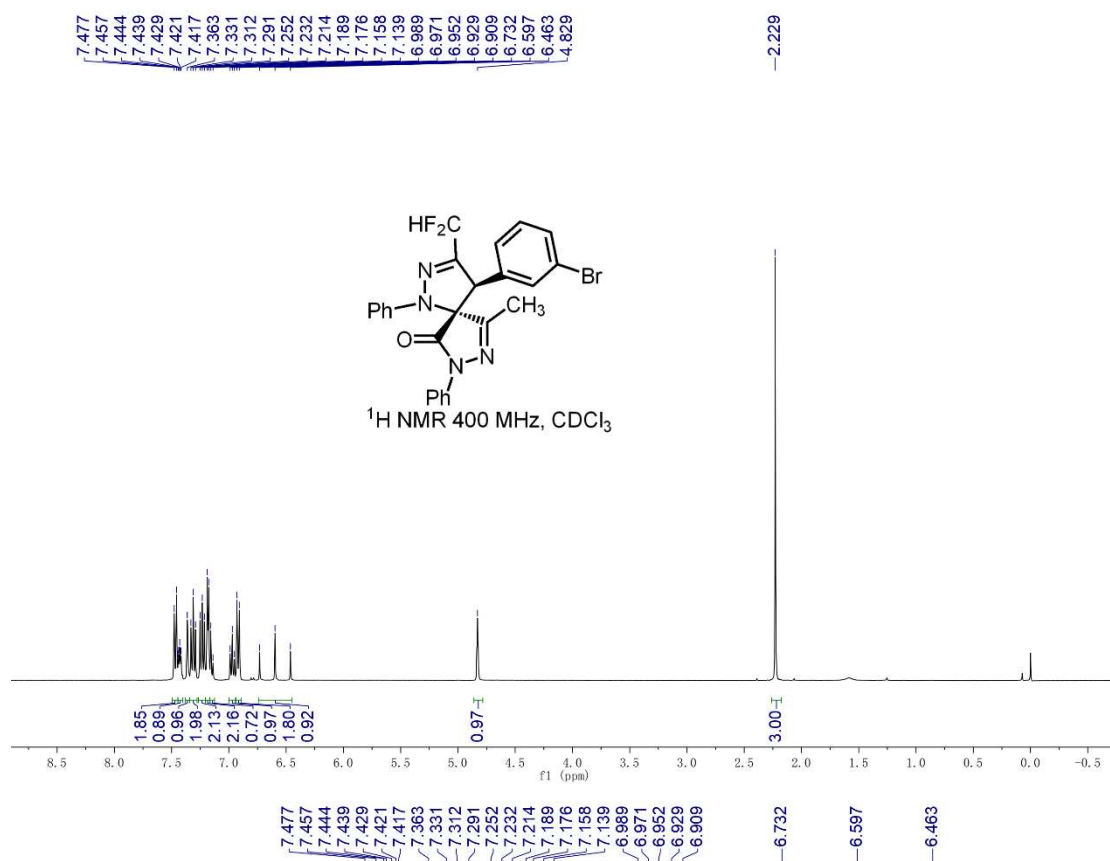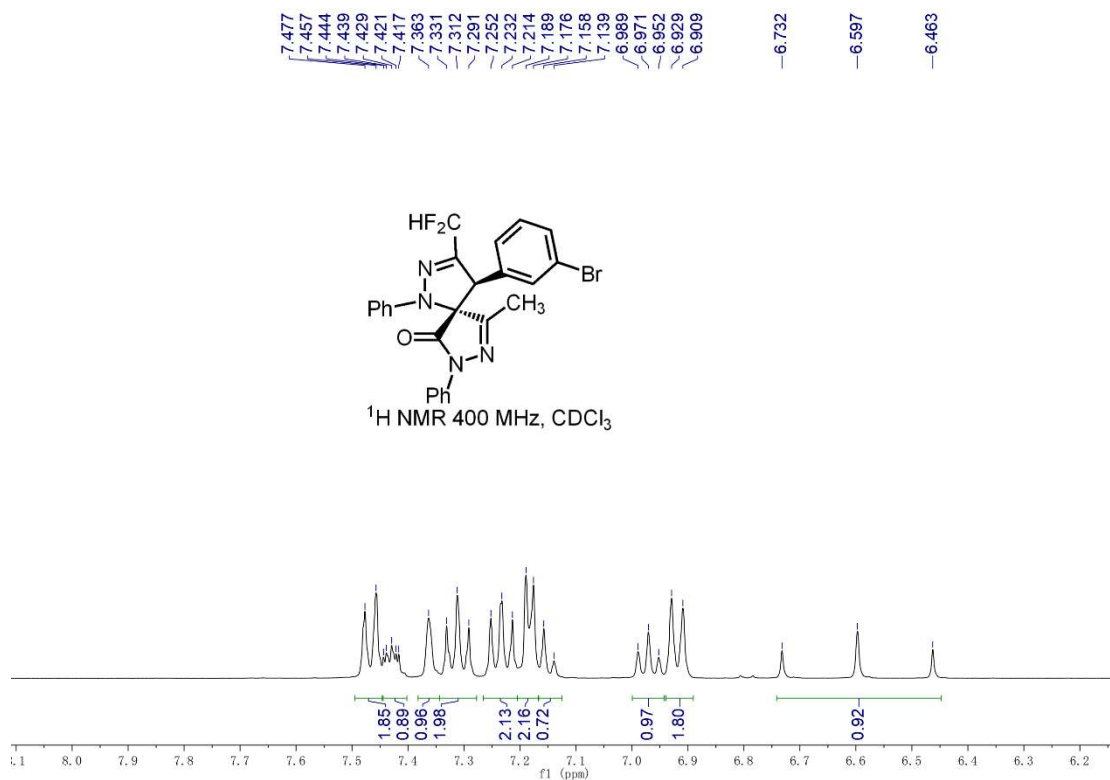

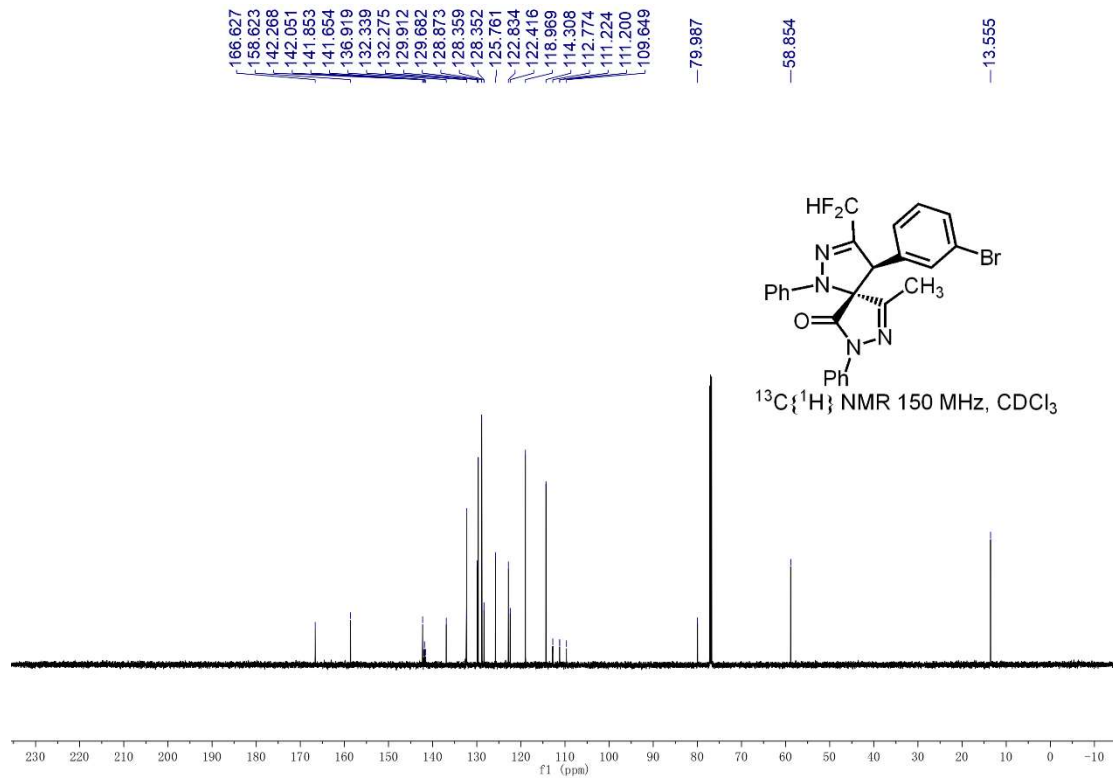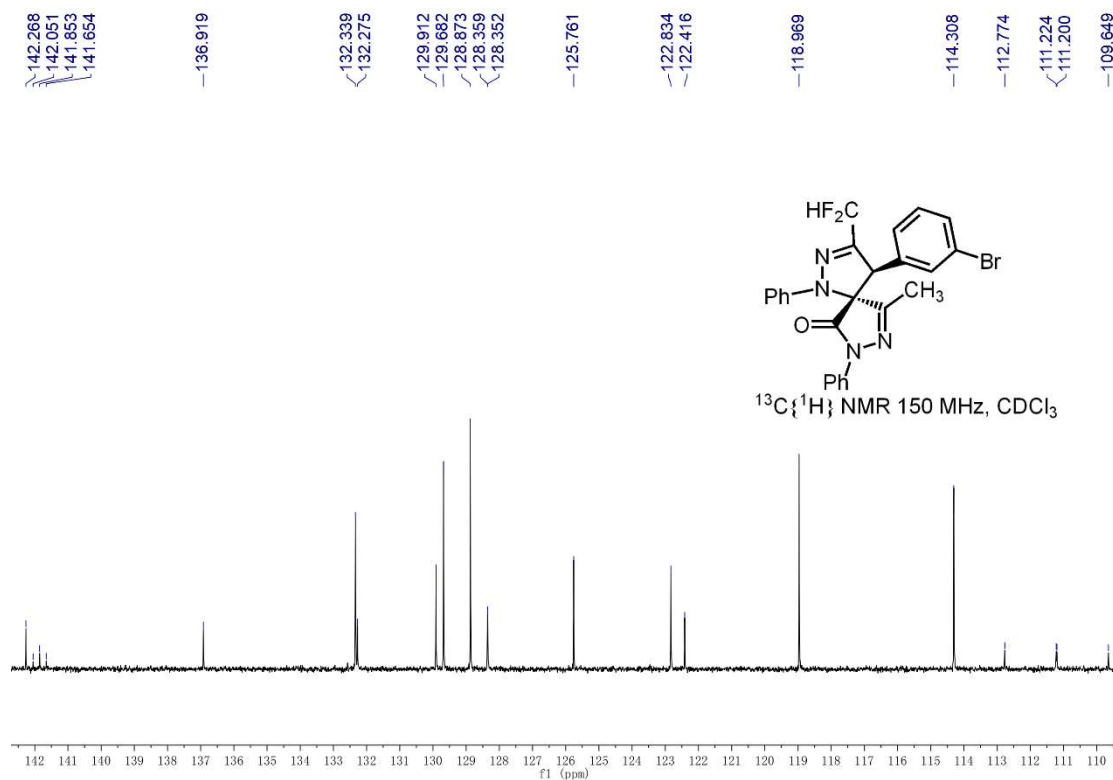

~111.848  
~111.992  
~112.696  
~112.841  
~117.771  
~117.913  
~118.619  
~118.761

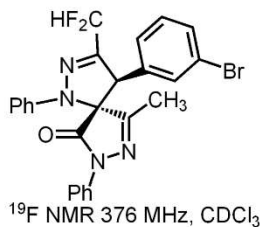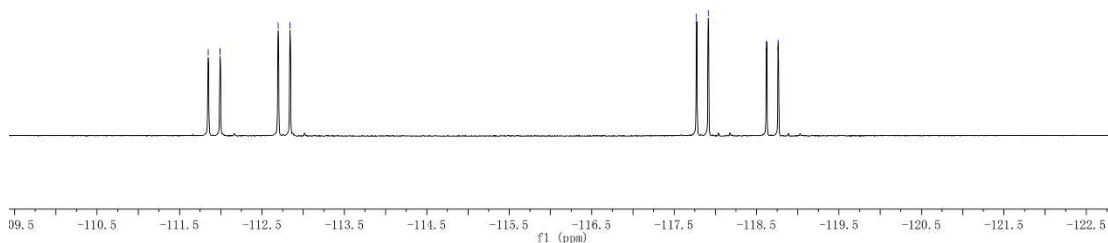

HRMS (ESI) copy of compound (*cis*)-4e:

## Mass Spectrum SmartFormula Report

### Analysis Info

Analysis Name D:\Data\user\NWNWU-fengyang 20230321-7.d  
Method tune\_low.m  
Sample Name A-521  
Comment

Acquisition Date 2023-3-21 15:40:46

Operator BDAL@DE  
Instrument / Ser# micrOTOF-Q 20453

### Acquisition Parameter

|             |          |                       |           |                  |           |
|-------------|----------|-----------------------|-----------|------------------|-----------|
| Source Type | ESI      | Ion Polarity          | Positive  | Set Nebulizer    | 0.4 Bar   |
| Focus       | Active   | Set Capillary         | 4500 V    | Set Dry Heater   | 180 j°C   |
| Scan Begin  | 50 m/z   | Set End Plate Offset  | -500 V    | Set Dry Gas      | 4.0 l/min |
| Scan End    | 1000 m/z | Set Collision Cell RF | 300.0 Vpp | Set Divert Valve | Waste     |

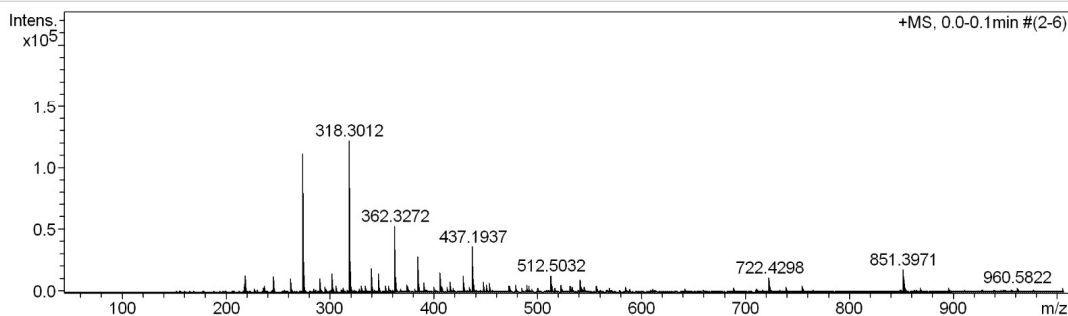

| Meas. #  | Formula                                                               | m/z      | err [ppm] | Me an [ppm] | rdb  | N  | ej% Con | mSi gma | Std I | St d M ea n/z | Std l Var m | St d Nor m | St d Dif f | Std Com b Dev |
|----------|-----------------------------------------------------------------------|----------|-----------|-------------|------|----|---------|---------|-------|---------------|-------------|------------|------------|---------------|
| 531.0613 | 1 C <sub>25</sub> H <sub>19</sub> BrF <sub>2</sub> N <sub>4</sub> NaO | 531.0603 | -2.0      | -0.9        | 16.5 | ok | even    | 129.2   | 127.7 | 0.7           | 53.5        | 0.8        | 842.7      |               |



NMR copies of compound (*trans*)-4f:

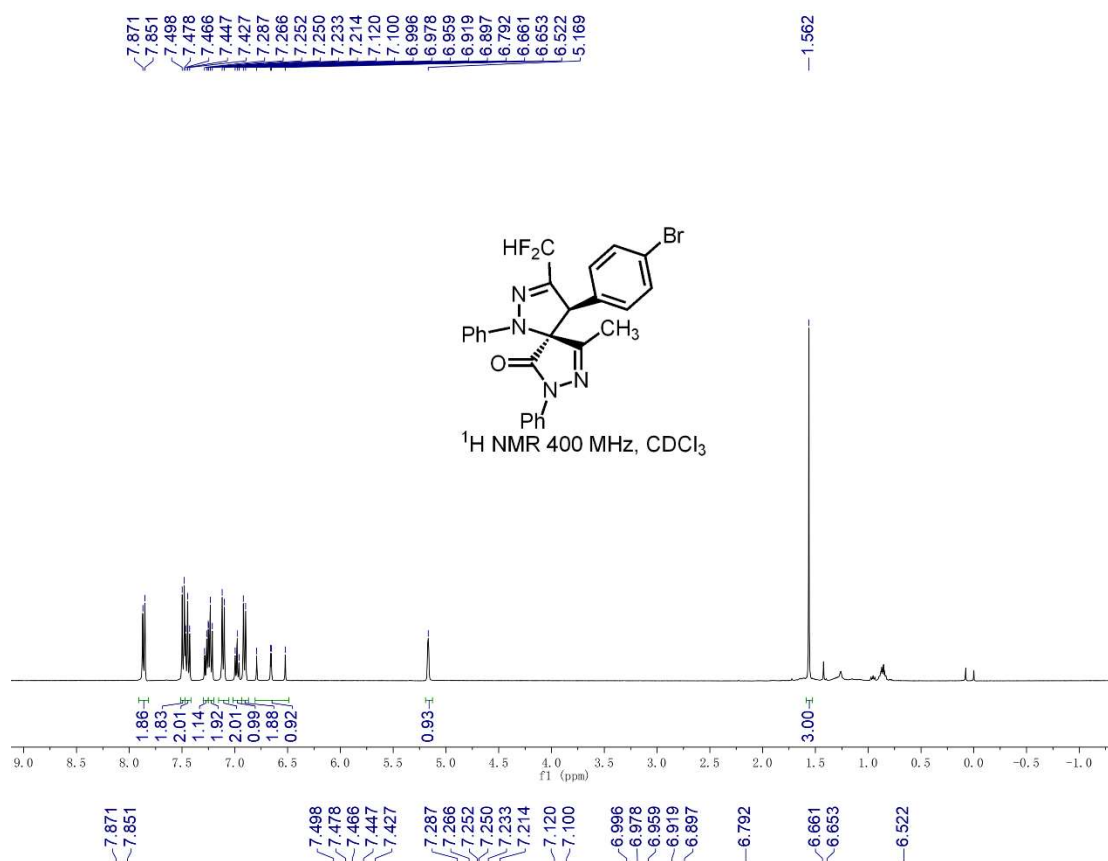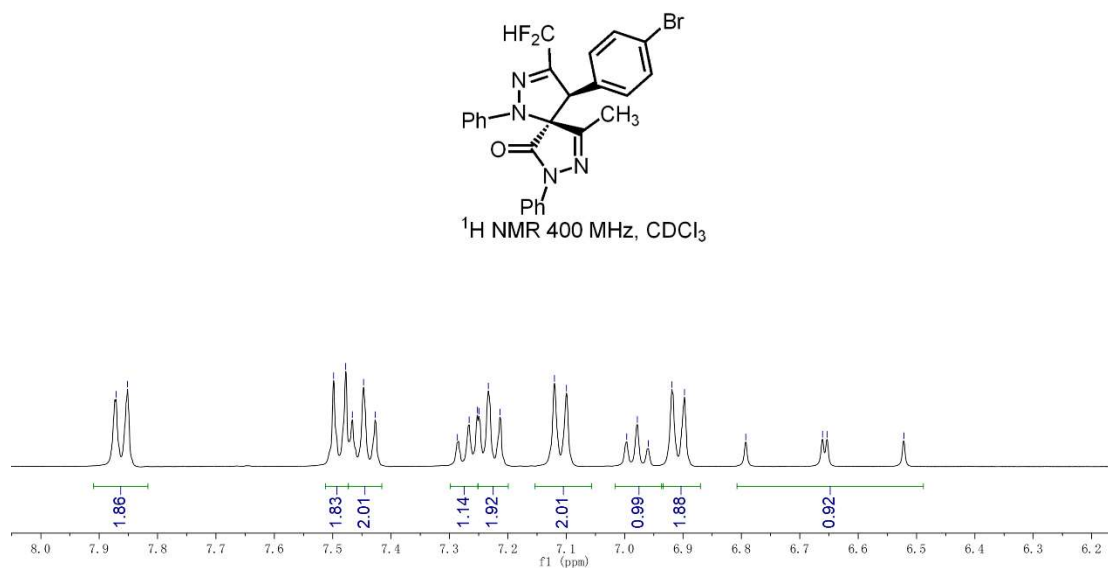



-107.903  
-108.051  
-108.753  
-108.901

-119.647  
-119.786  
-120.497  
-120.636

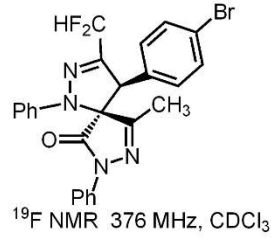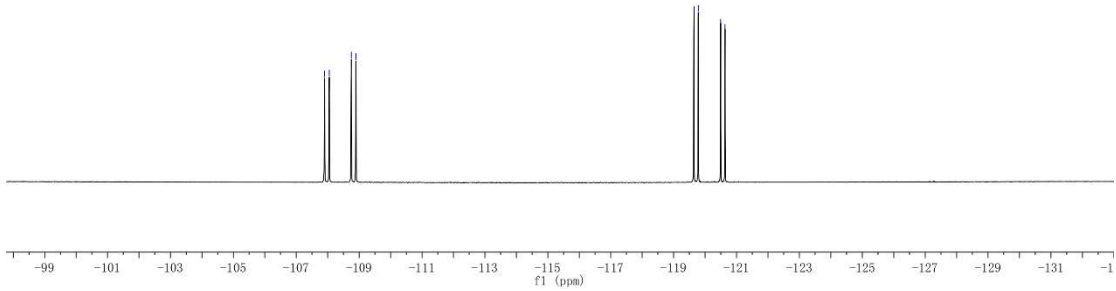

HRMS (ESI) copy of compound (*trans*)-4f:

### Mass Spectrum SmartFormula Report

#### Analysis Info

Analysis Name D:\Data\user\NWNNU-fengyang 20230321-8.d  
Method tune\_low.m  
Sample Name A-51  
Comment

Acquisition Date 2023-3-21 15:42:30

Operator BDAL@DE  
Instrument / Ser# micrOTOF-Q 20453

#### Acquisition Parameter

|             |          |                       |           |                  |           |
|-------------|----------|-----------------------|-----------|------------------|-----------|
| Source Type | ESI      | Ion Polarity          | Positive  | Set Nebulizer    | 0.4 Bar   |
| Focus       | Active   | Set Capillary         | 4500 V    | Set Dry Heater   | 180 j°C   |
| Scan Begin  | 50 m/z   | Set End Plate Offset  | -500 V    | Set Dry Gas      | 4.0 l/min |
| Scan End    | 1000 m/z | Set Collision Cell RF | 300.0 Vpp | Set Divert Valve | Waste     |

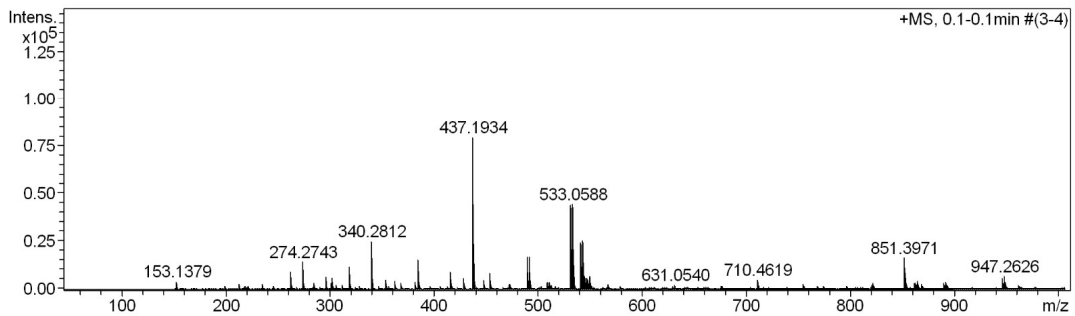

| Meas. #  | Formula                                                               | m/z      | err [ppm] | Me an err [ppm] | rdb  | N- R ul e | e j % Con f | mSi gm a | Std l | St d M ea n m/z | St d Va rN or m | St d m/ z | Std Com b Dev |
|----------|-----------------------------------------------------------------------|----------|-----------|-----------------|------|-----------|-------------|----------|-------|-----------------|-----------------|-----------|---------------|
| 531.0609 | 1 C <sub>25</sub> H <sub>19</sub> BrF <sub>2</sub> N <sub>4</sub> NaO | 531.0603 | -1.3      | -0.6            | 16.5 | ok        | even        | 15.0     | 13.9  | 0.7             | 5.0             | 1.0       | 842.7         |

NMR copies of compound (*cis*)-4f:

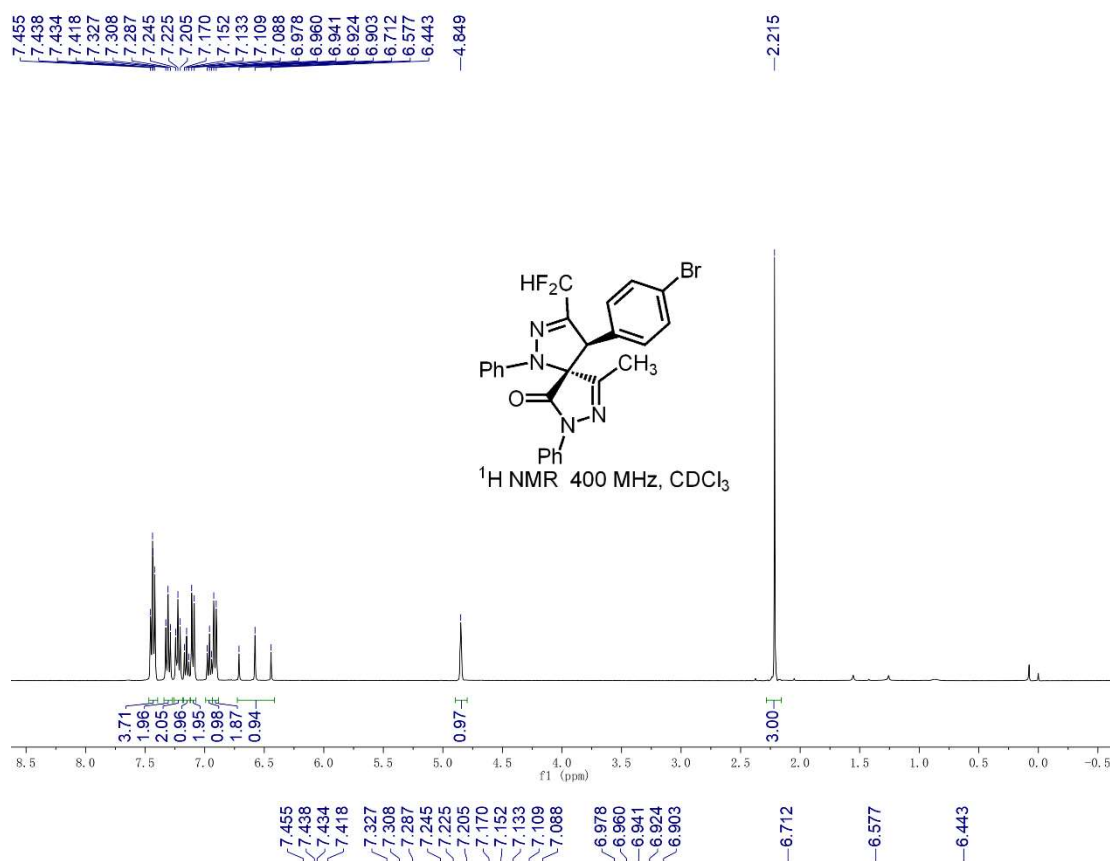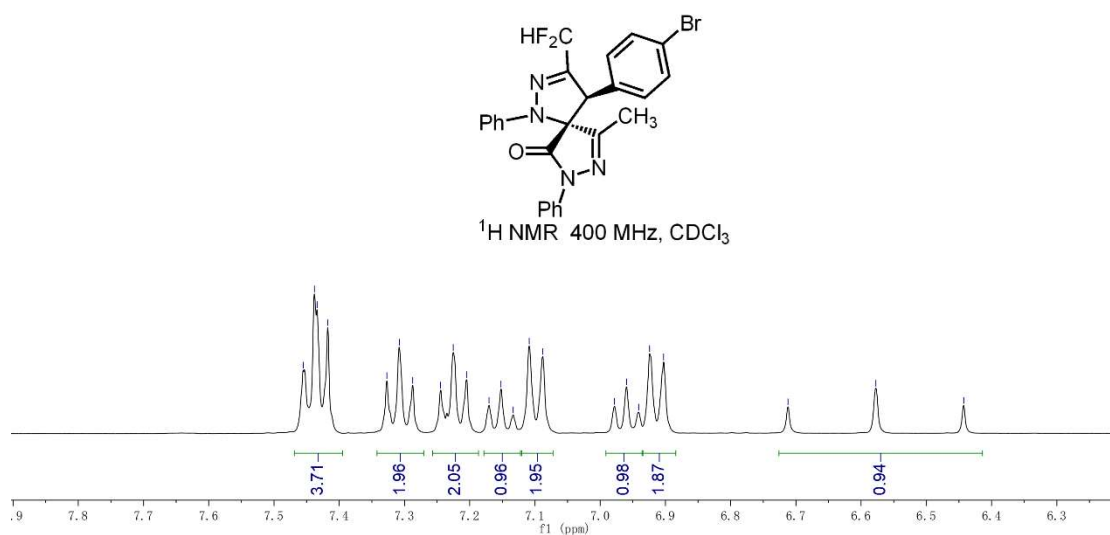

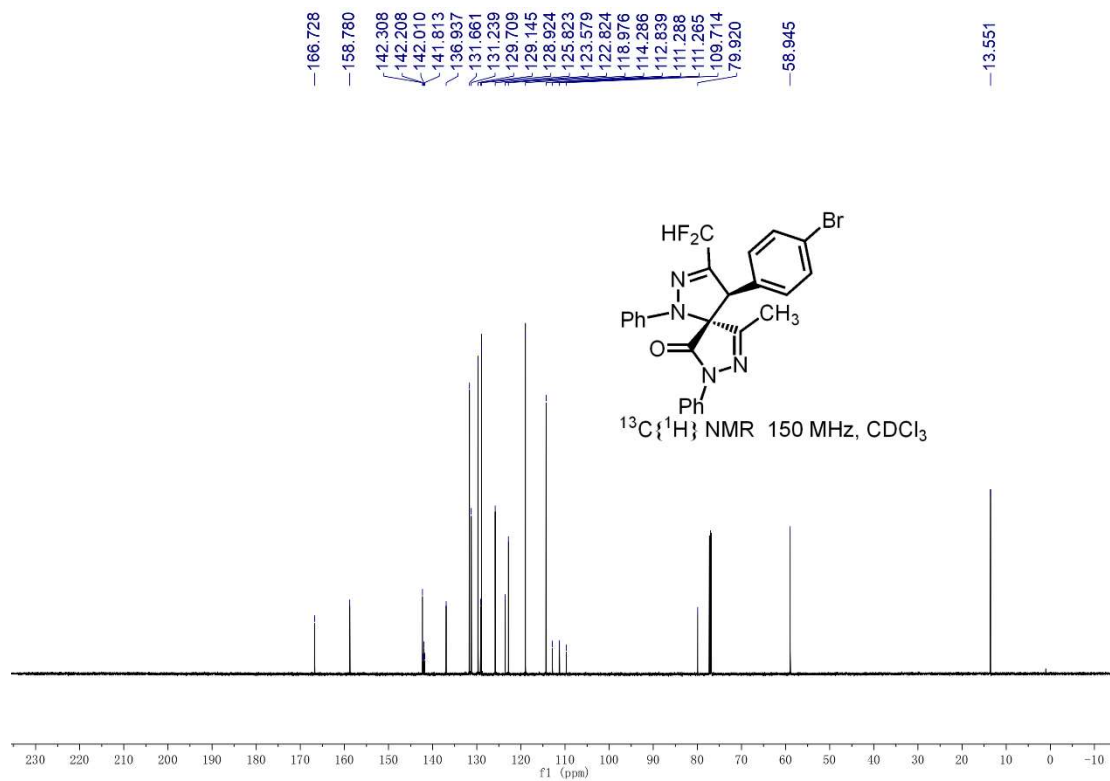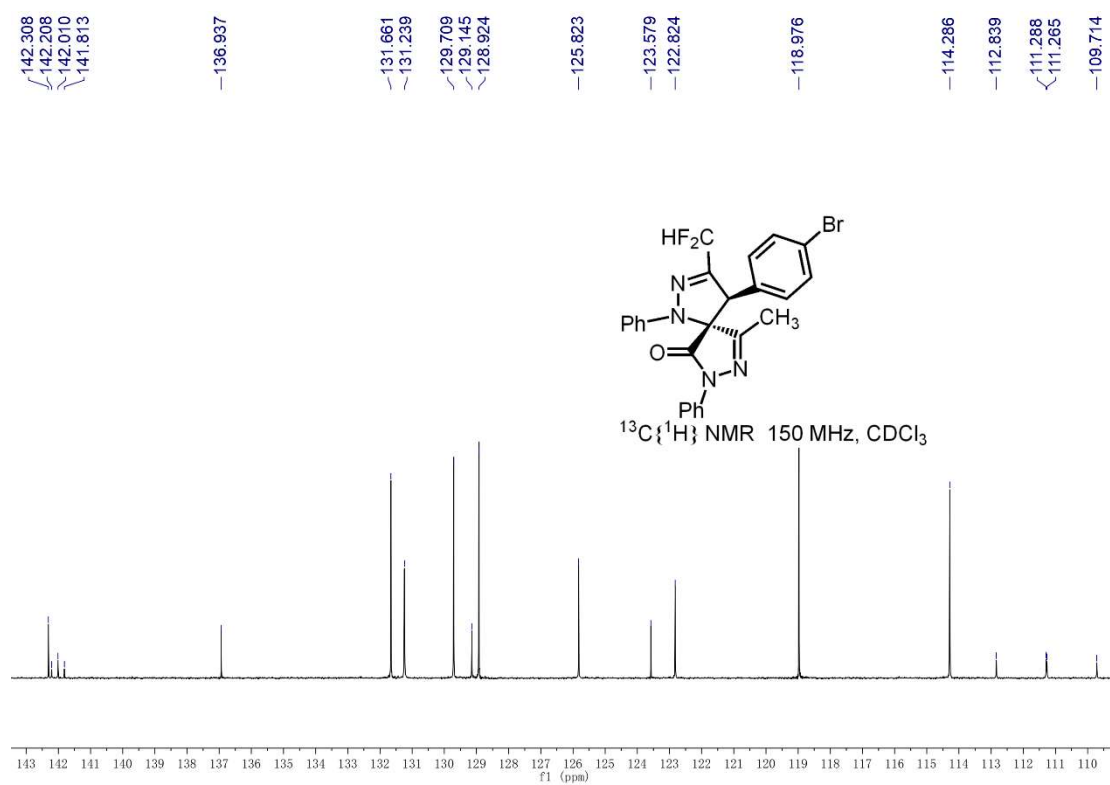

~-111.520  
 ~-111.665  
 ~-112.369  
 ~-112.513  
 ~-117.970  
 ~-118.112  
 ~-118.819  
 ~-118.960

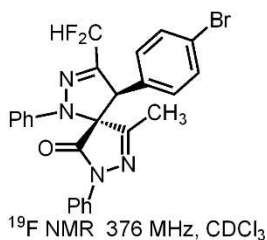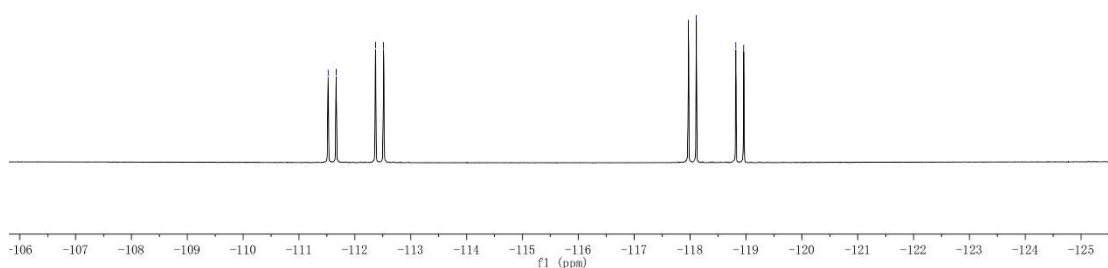

HRMS (ESI) copy of compound (*cis*)-4f:

### Mass Spectrum SmartFormula Report

#### Analysis Info

Analysis Name D:\Data\user\NWNNU-fengyang 20230321-9.d  
 Method tune\_low.m  
 Sample Name A-511  
 Comment

Acquisition Date 2023-3-21 15:44:10

Operator BDAL@DE  
 Instrument / Ser# micrOTOF-Q 20453

#### Acquisition Parameter

|             |          |                       |           |                  |           |
|-------------|----------|-----------------------|-----------|------------------|-----------|
| Source Type | ESI      | Ion Polarity          | Positive  | Set Nebulizer    | 0.4 Bar   |
| Focus       | Active   | Set Capillary         | 4500 V    | Set Dry Heater   | 180 j°C   |
| Scan Begin  | 50 m/z   | Set End Plate Offset  | -500 V    | Set Dry Gas      | 4.0 l/min |
| Scan End    | 1000 m/z | Set Collision Cell RF | 300.0 Vpp | Set Divert Valve | Waste     |

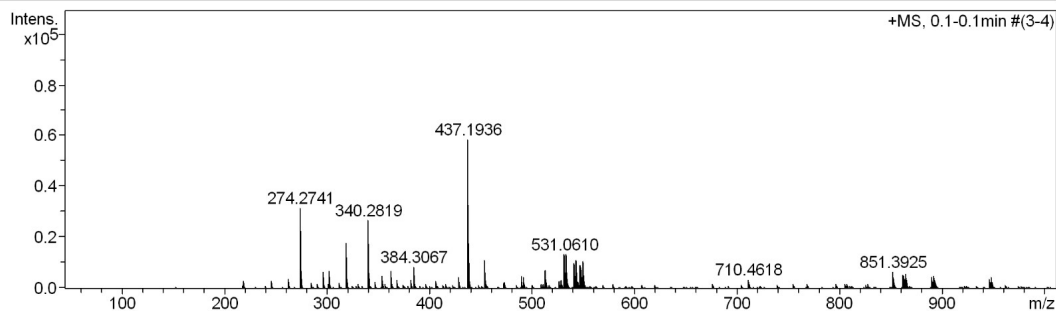

| Meas. #  | Formula                                                               | m/z      | err [ppm] | Me an err [ppm] | rdb  | N  | e j % | mSi gm | Std l | St d l | Std Var m | St d l | Std Com b |
|----------|-----------------------------------------------------------------------|----------|-----------|-----------------|------|----|-------|--------|-------|--------|-----------|--------|-----------|
| 531.0610 | 1 C <sub>25</sub> H <sub>19</sub> BrF <sub>2</sub> N <sub>4</sub> NaO | 531.0603 | -1.3      | -0.1            | 16.5 | ok | even  | 22.6   | 19.8  | 0.7    | 11.2      | 0.9    | 842.7     |

NMR copies of compound (*trans*)-4g:

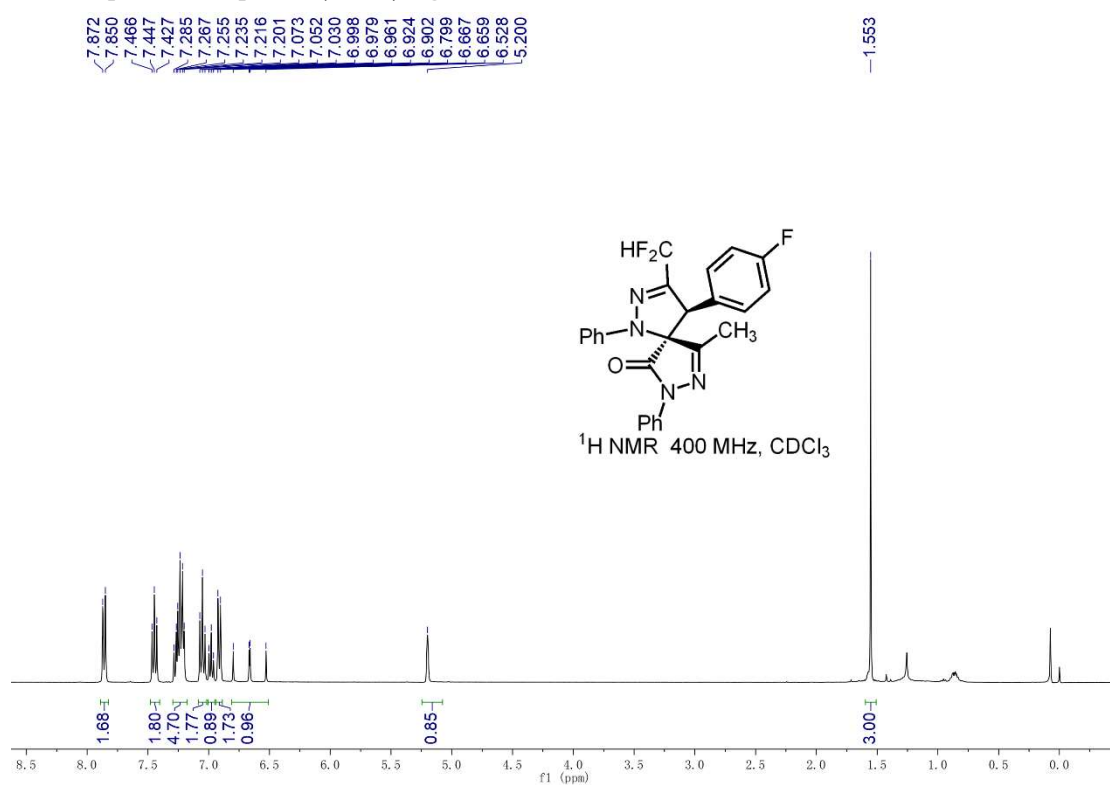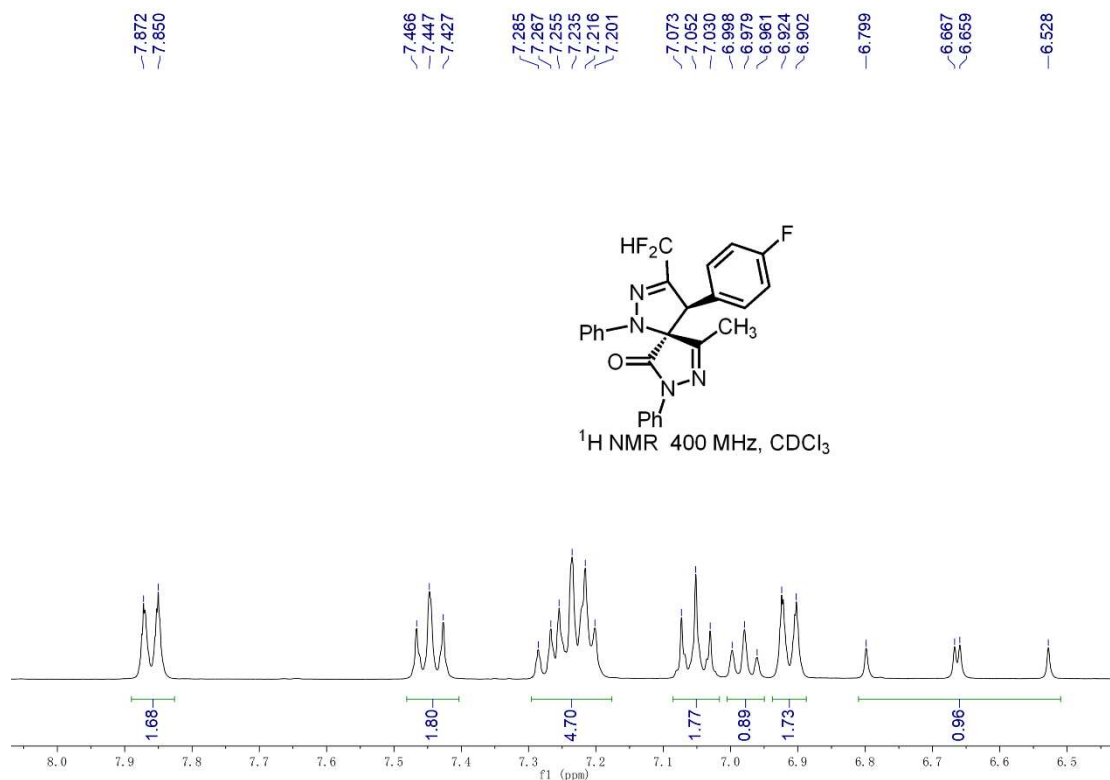

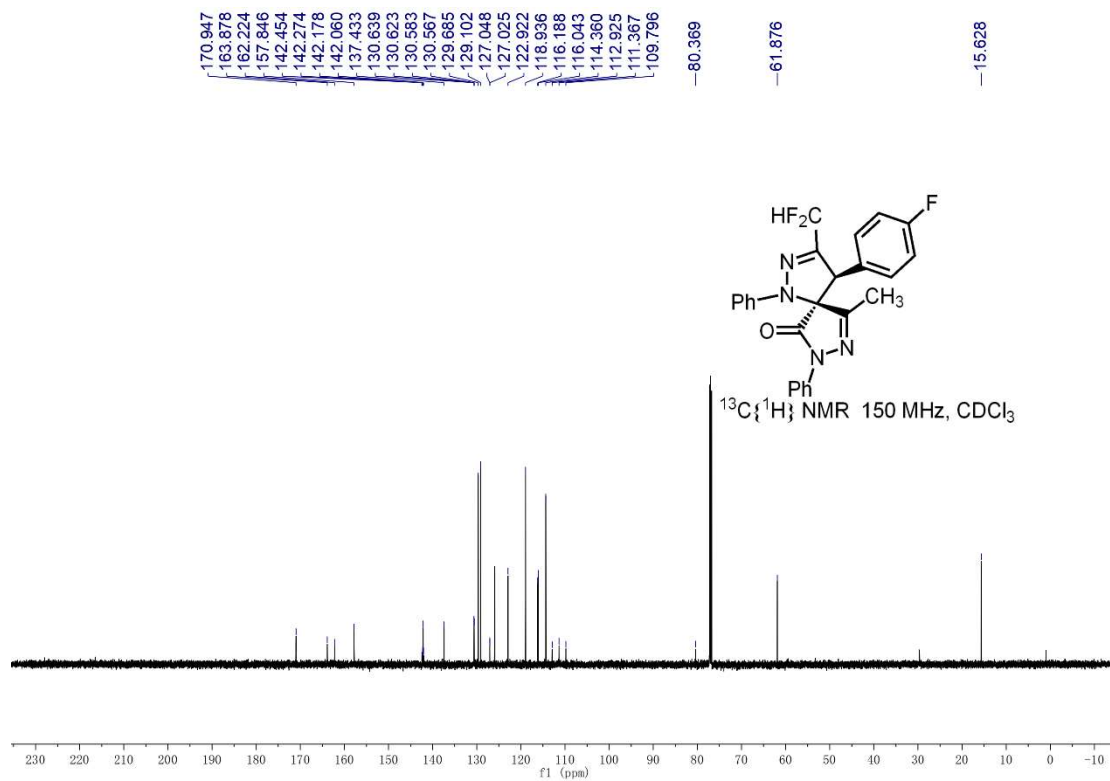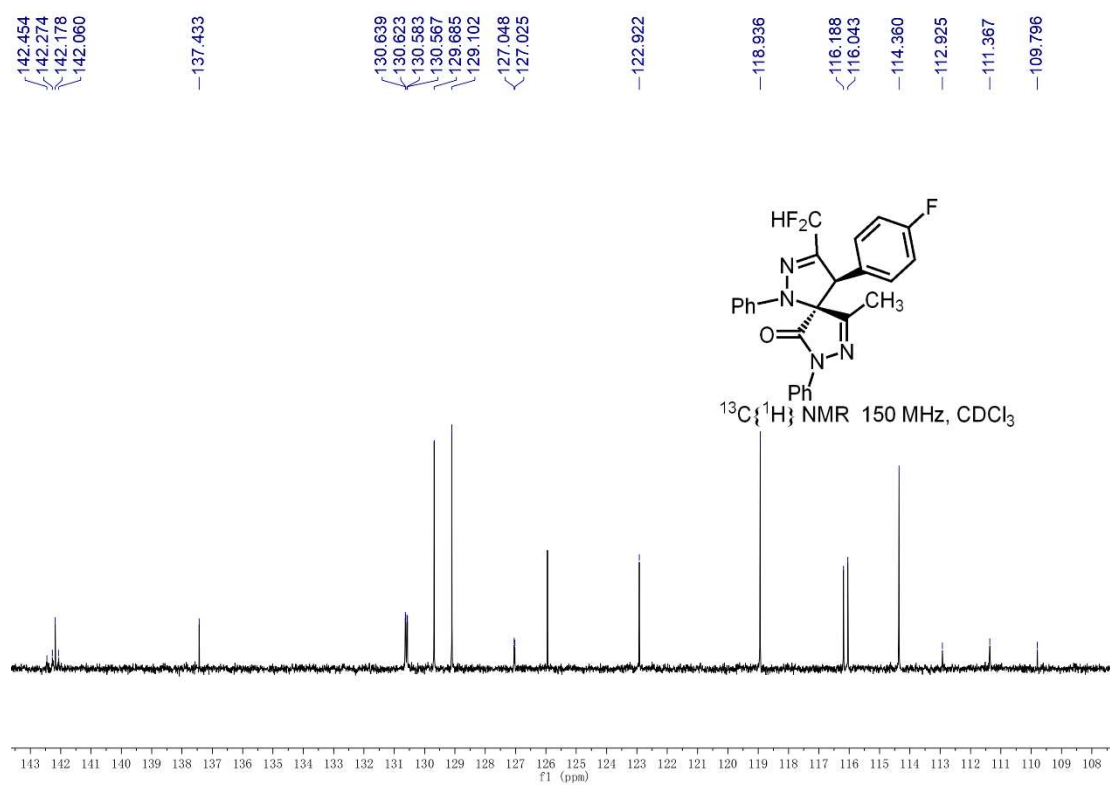



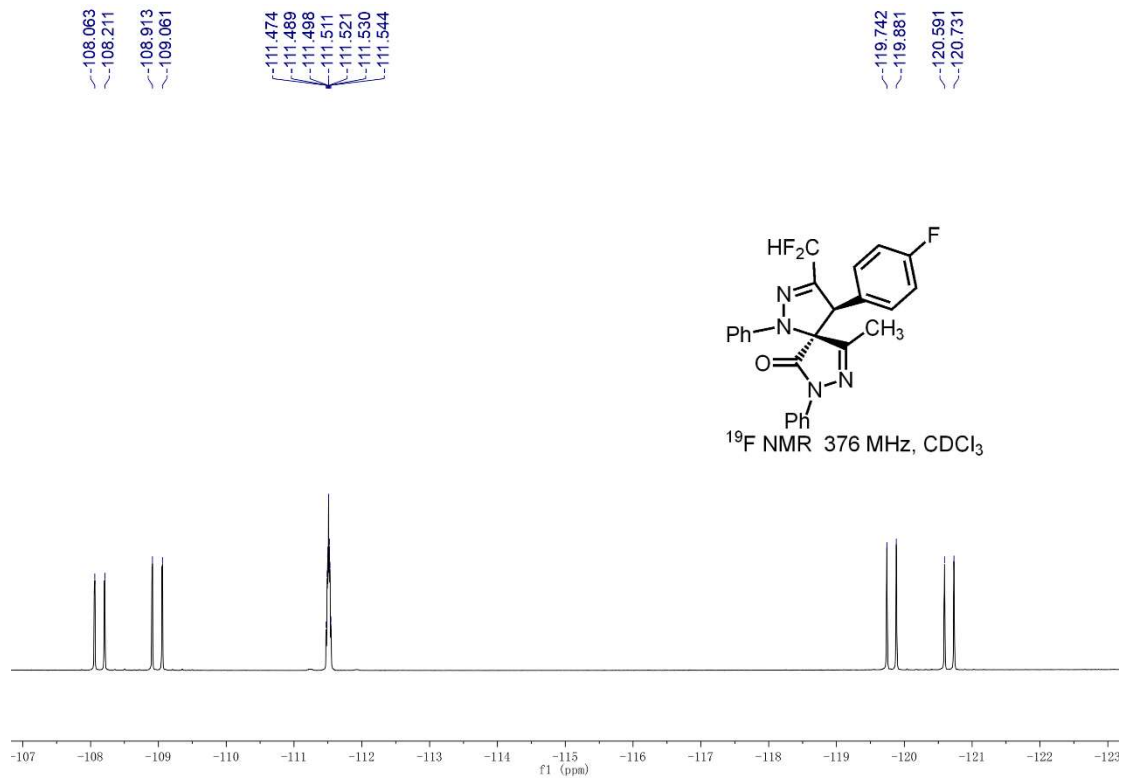

HRMS (ESI) copy of compound (*trans*)-4g:

### Mass Spectrum SmartFormula Report

#### Analysis Info

Analysis Name D:\Data\user\NWNW-fengyang 20230321-10.d  
 Method tune\_low.m  
 Sample Name A-50  
 Comment

Acquisition Date 2023-3-21 16:37:42  
 Operator BDAL@DE  
 Instrument / Ser# micrOTOF-Q 20453

#### Acquisition Parameter

|             |          |                       |           |                  |           |
|-------------|----------|-----------------------|-----------|------------------|-----------|
| Source Type | ESI      | Ion Polarity          | Positive  | Set Nebulizer    | 0.4 Bar   |
| Focus       | Active   | Set Capillary         | 4500 V    | Set Dry Heater   | 180 j°C   |
| Scan Begin  | 50 m/z   | Set End Plate Offset  | -500 V    | Set Dry Gas      | 4.0 l/min |
| Scan End    | 1000 m/z | Set Collision Cell RF | 500.0 Vpp | Set Divert Valve | Waste     |

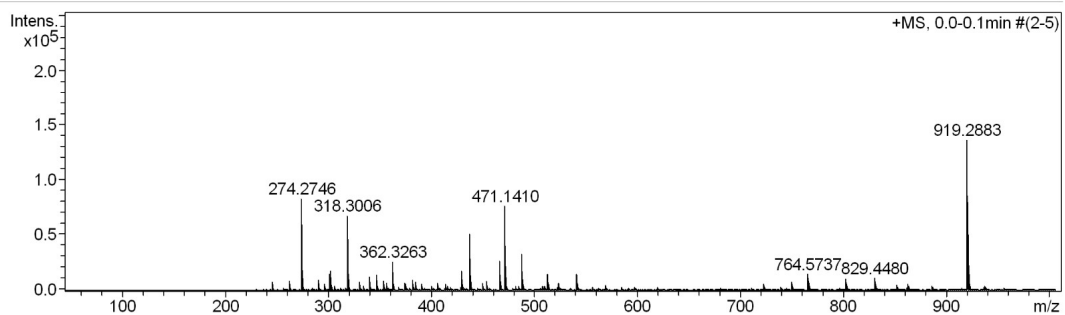

| Meas. #  | Formula                                                             | m/z      | err [ppm] | Me an err [ppm] | rdb  | N-R | ej¥ Conf | mS ig ma | Std l | Std Me an z | Std l Va rN or m | Std m/ z Diff | Std Com b Dev |
|----------|---------------------------------------------------------------------|----------|-----------|-----------------|------|-----|----------|----------|-------|-------------|------------------|---------------|---------------|
| 471.1410 | 1 C <sub>25</sub> H <sub>19</sub> F <sub>3</sub> N <sub>4</sub> NaO | 471.1403 | -1.4      | -1.5            | 16.5 | ok  | even     | 4.0      | 6.1   | 0.8         | 4.2              | 0.1           | 842.7         |

NMR copies of compound (*cis*)-4g:

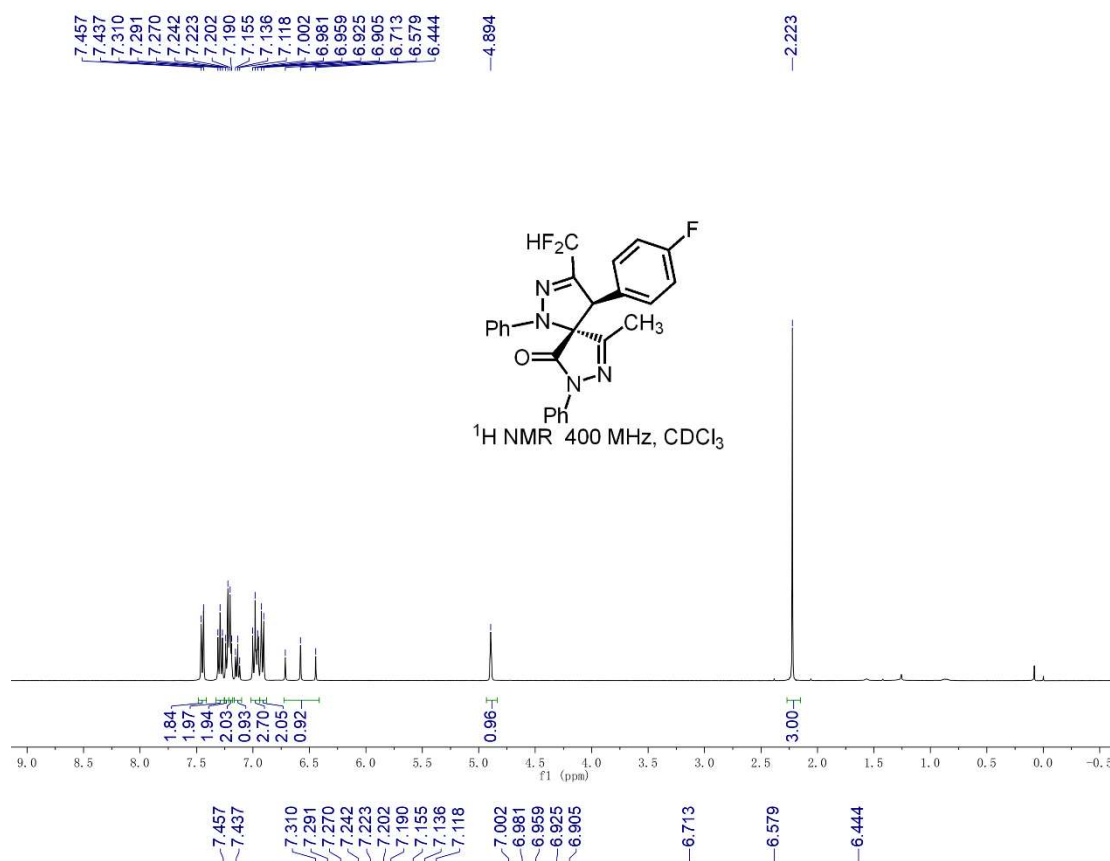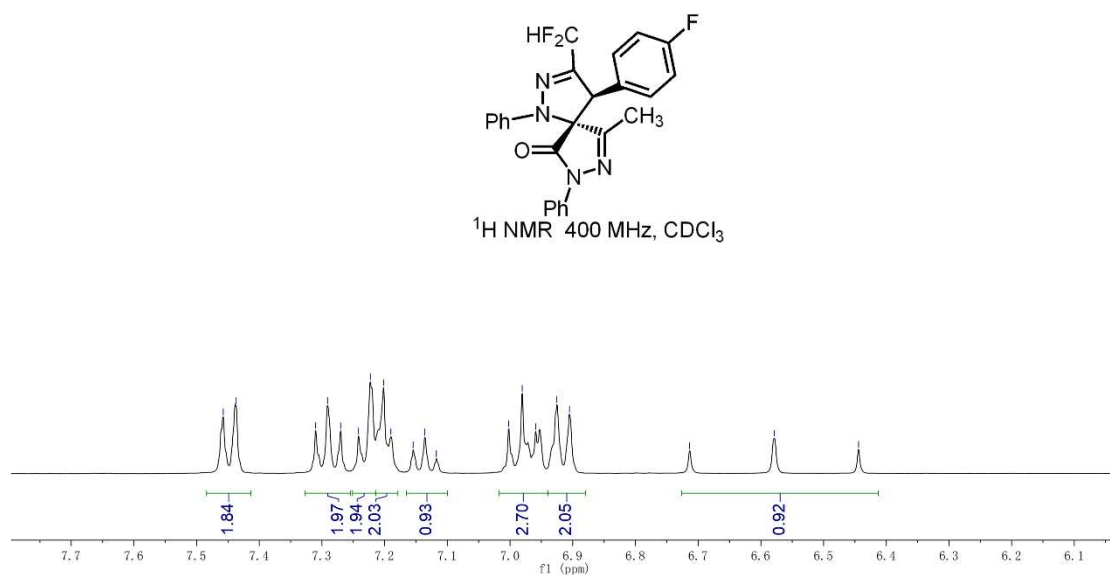

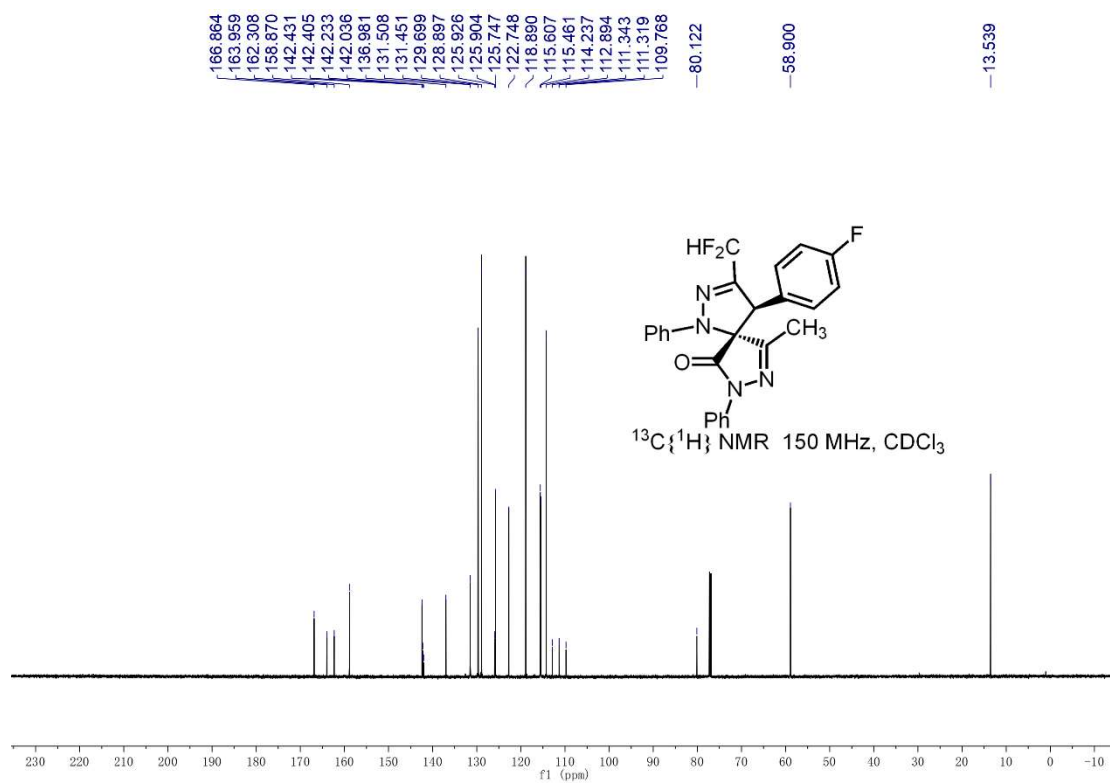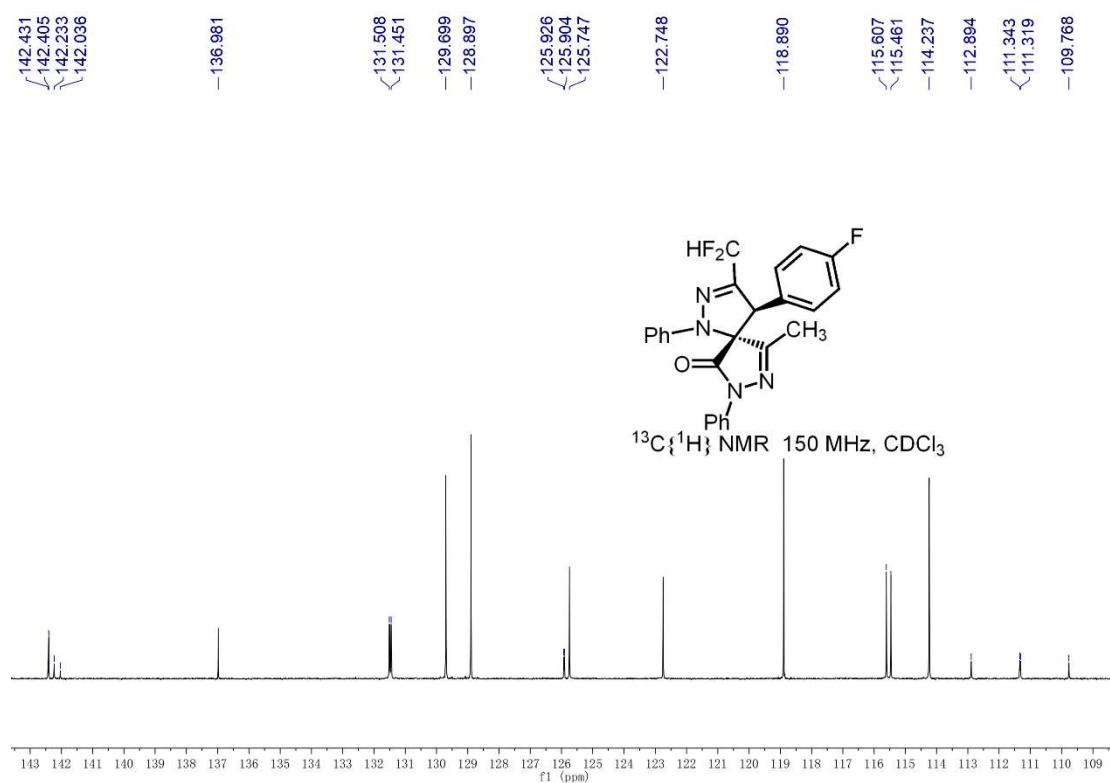

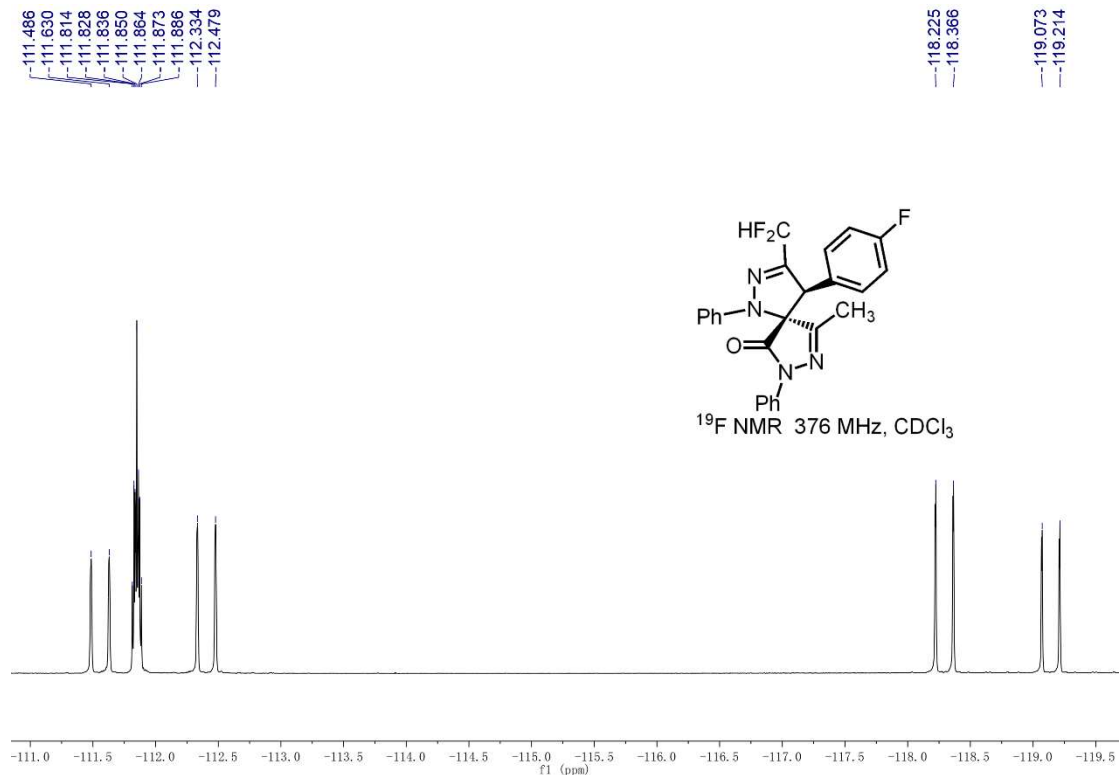

HRMS (ESI) copy of compound (*cis*)-4g:

### Mass Spectrum SmartFormula Report

#### Analysis Info

Analysis Name D:\Data\user\NWNW-fengyang 20230321--11.d  
 Method tune\_low.m  
 Sample Name A-501  
 Comment

Acquisition Date 2023-3-21 16:41:00

Operator BDAL@DE  
 Instrument / Ser# micrOTOF-Q 20453

#### Acquisition Parameter

|             |          |                       |           |                  |                   |
|-------------|----------|-----------------------|-----------|------------------|-------------------|
| Source Type | ESI      | Ion Polarity          | Positive  | Set Nebulizer    | 0.4 Bar           |
| Focus       | Active   | Set Capillary         | 4500 V    | Set Dry Heater   | 180 $\mu\text{C}$ |
| Scan Begin  | 50 m/z   | Set End Plate Offset  | -500 V    | Set Dry Gas      | 4.0 l/min         |
| Scan End    | 1000 m/z | Set Collision Cell RF | 500.0 Vpp | Set Divert Valve | Waste             |

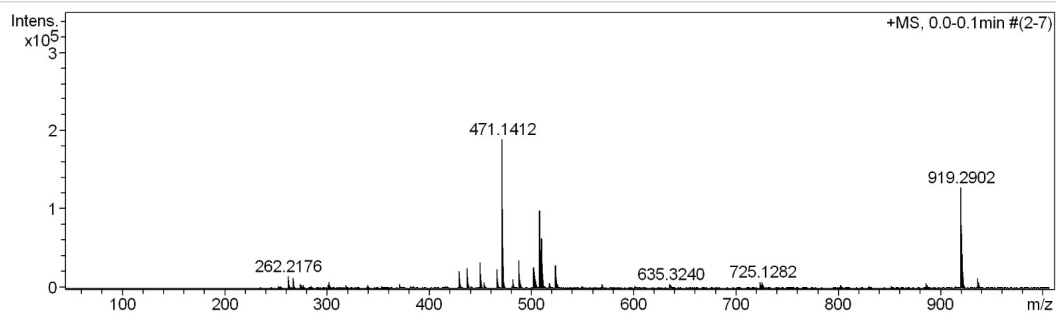

| Meas. #  | Formula                                                             | m/z      | err [ppm] | Me an err [ppm] | rdb  | N-R | e <sub>j</sub> Conf | m Sig | Std l | St d    | St d l  | St d      | Std Com |
|----------|---------------------------------------------------------------------|----------|-----------|-----------------|------|-----|---------------------|-------|-------|---------|---------|-----------|---------|
| m/z      |                                                                     |          |           |                 |      |     |                     |       |       | Me an z | Va rN z | m/ or Dif | b Dev   |
| 471.1412 | 1 C <sub>25</sub> H <sub>19</sub> F <sub>3</sub> N <sub>4</sub> NaO | 471.1403 | -2.0      | -2.1            | 16.5 | ok  | even                | 8.6   | 11.9  | 1.0     | 5.4     | 0.3       | 842.7   |

NMR copies of compound (*trans*)-4h:

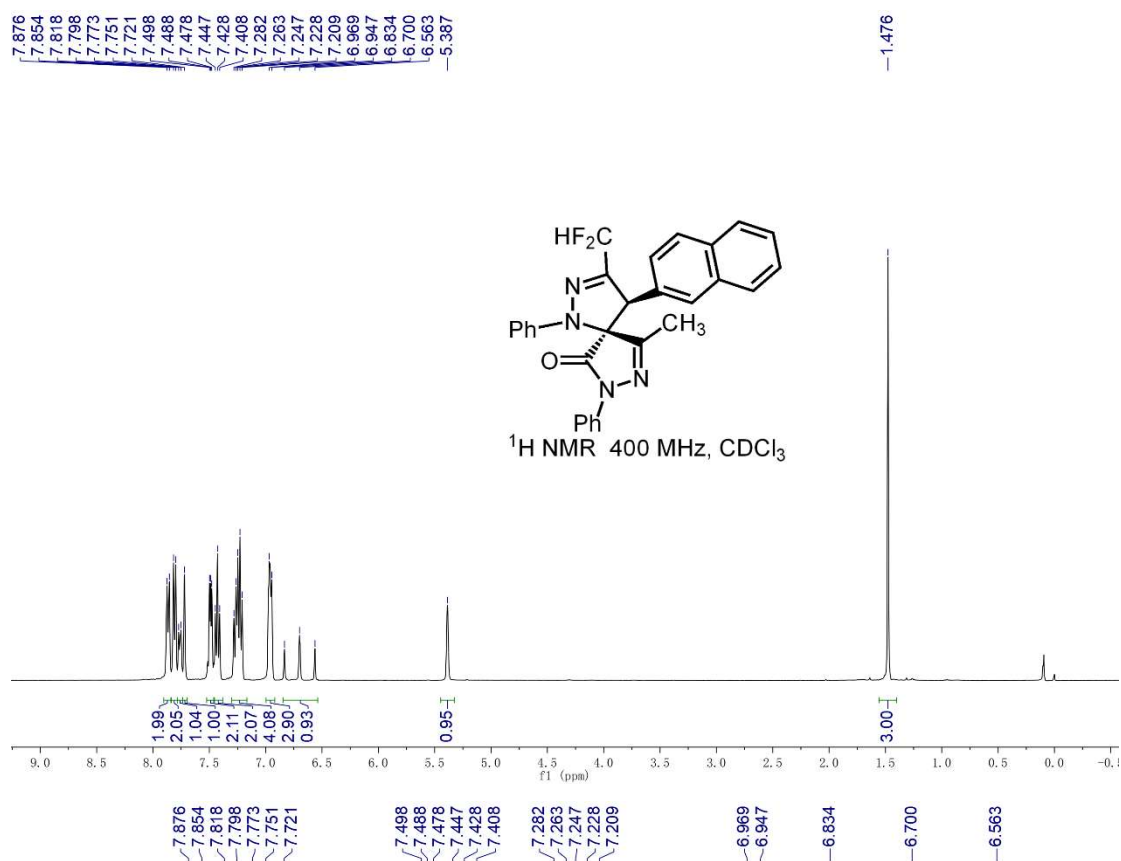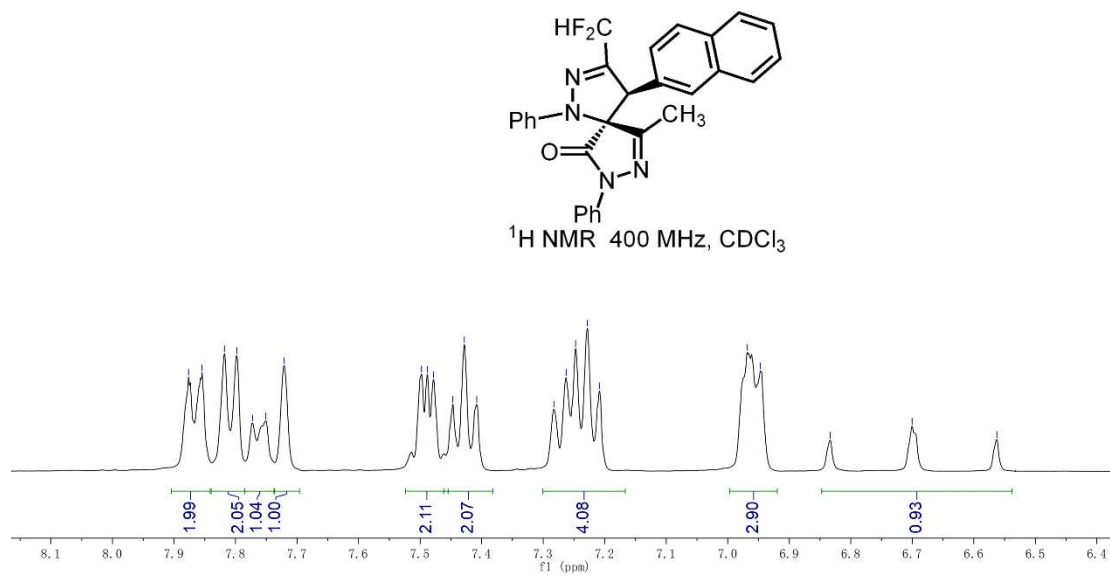

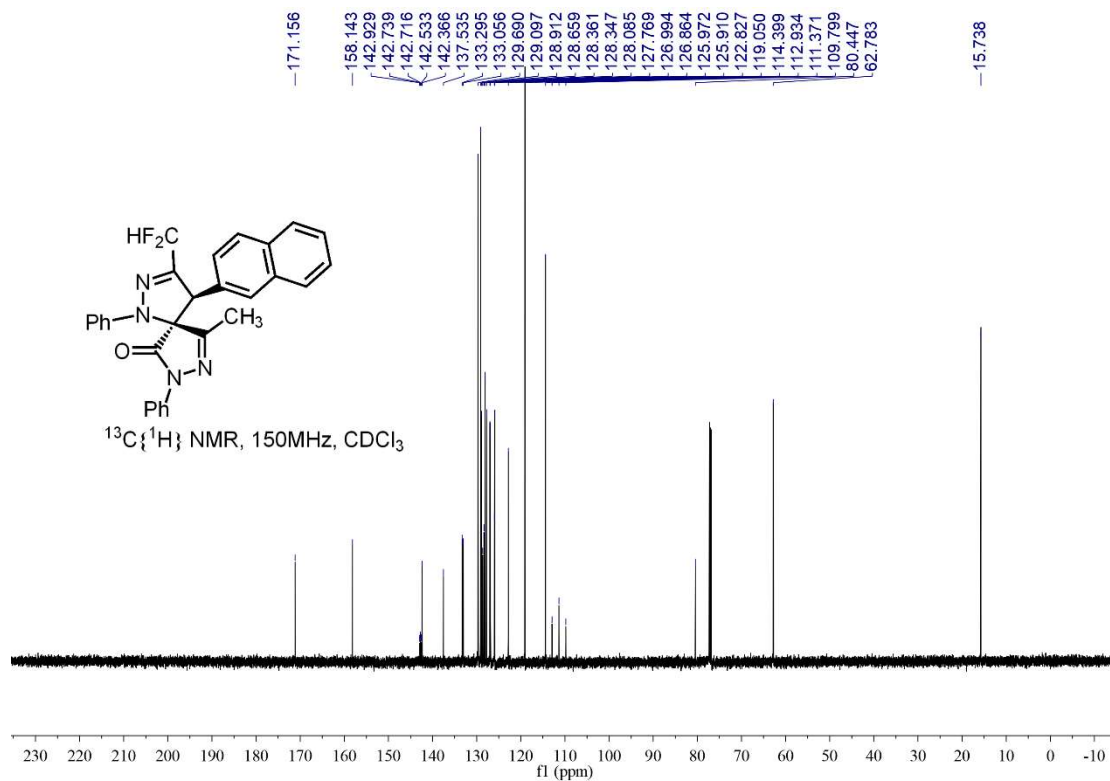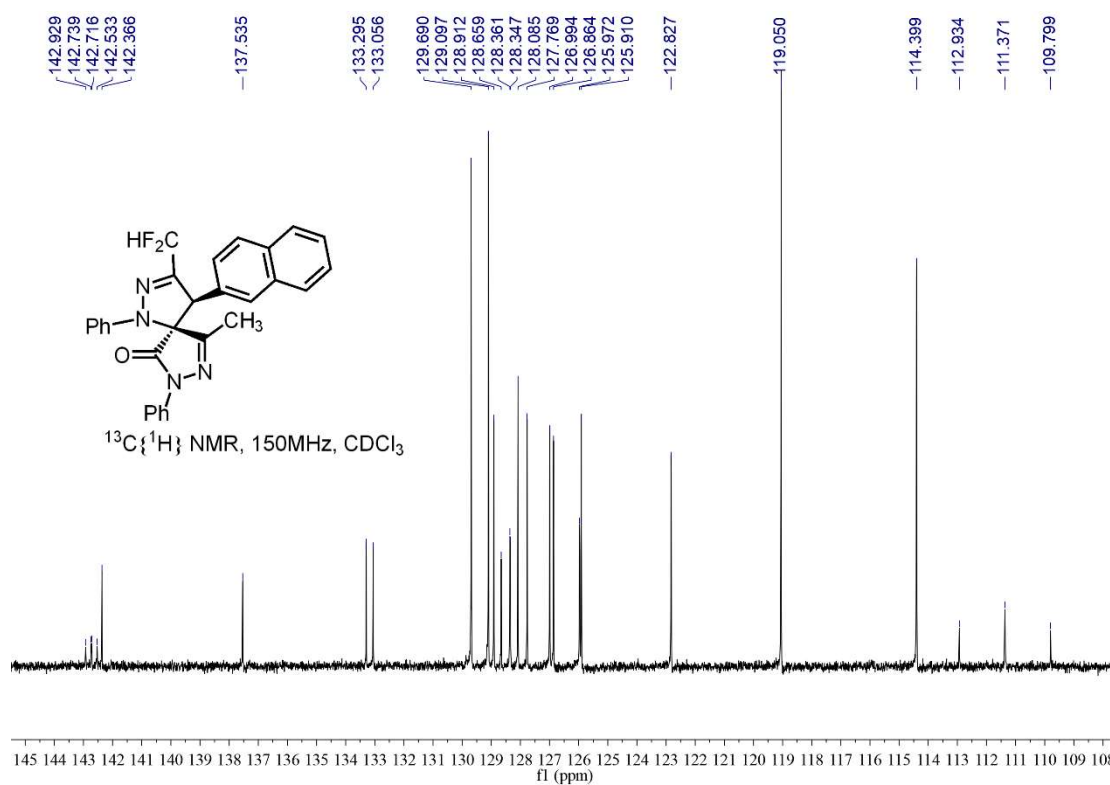

-108.391  
-108.539  
-109.238  
-109.386

-119.554  
-119.694  
-120.401  
-120.541

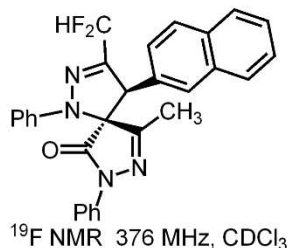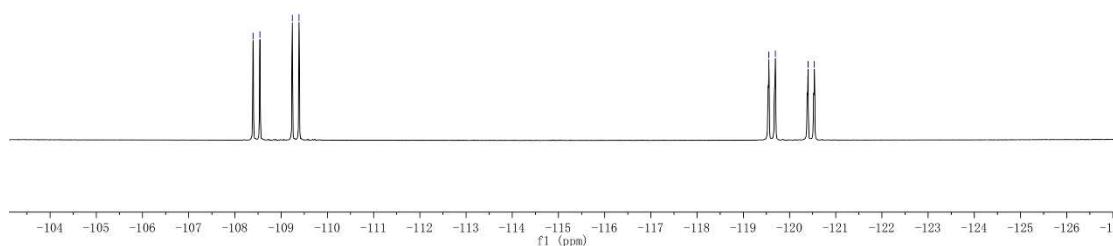

HRMS (ESI) copy of compound (*trans*)-4h:

### Mass Spectrum SmartFormula Report

#### Analysis Info

Analysis Name D:\Data\user\NWN\U-fengyang 20230321-12.d  
Method tune\_low.m  
Sample Name A-34  
Comment

Acquisition Date 2023-3-21 16:43:38  
Operator BDAL@DE  
Instrument / Ser# micrOTOF-Q 20453

#### Acquisition Parameter

|             |          |                       |           |                  |           |
|-------------|----------|-----------------------|-----------|------------------|-----------|
| Source Type | ESI      | Ion Polarity          | Positive  | Set Nebulizer    | 0.4 Bar   |
| Focus       | Active   | Set Capillary         | 4500 V    | Set Dry Heater   | 180 j°C   |
| Scan Begin  | 50 m/z   | Set End Plate Offset  | -500 V    | Set Dry Gas      | 4.0 l/min |
| Scan End    | 1000 m/z | Set Collision Cell RF | 500.0 Vpp | Set Divert Valve | Waste     |

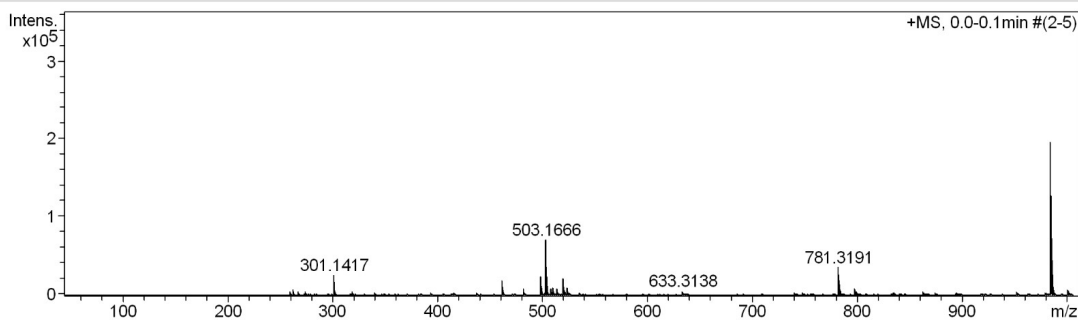

| Meas. #  | Formula                                                           | m/z      | err [ppm] | Me an err [ppm] | rdb  | N-R | ej% Conf | m Sigma | Std l | St d | St d l | St d | Std Com b |
|----------|-------------------------------------------------------------------|----------|-----------|-----------------|------|-----|----------|---------|-------|------|--------|------|-----------|
| 503.1666 | C <sub>29</sub> H <sub>22</sub> F <sub>2</sub> N <sub>4</sub> NaO | 503.1654 | -2.5      | -2.3            | 19.5 | ok  | even     | 6.0     | 10.2  | 1.2  | 4.2    | 0.9  | 842.7     |





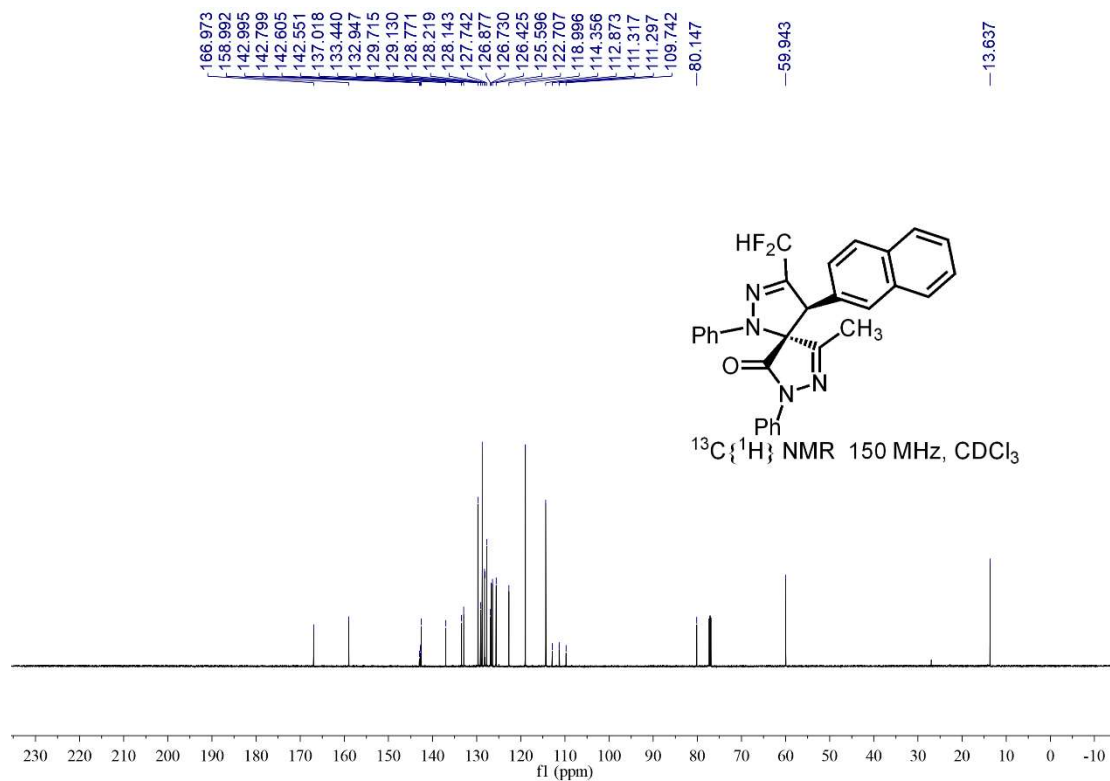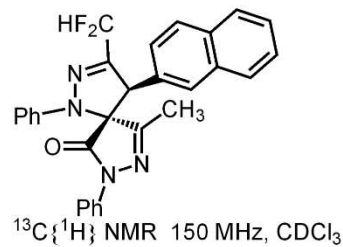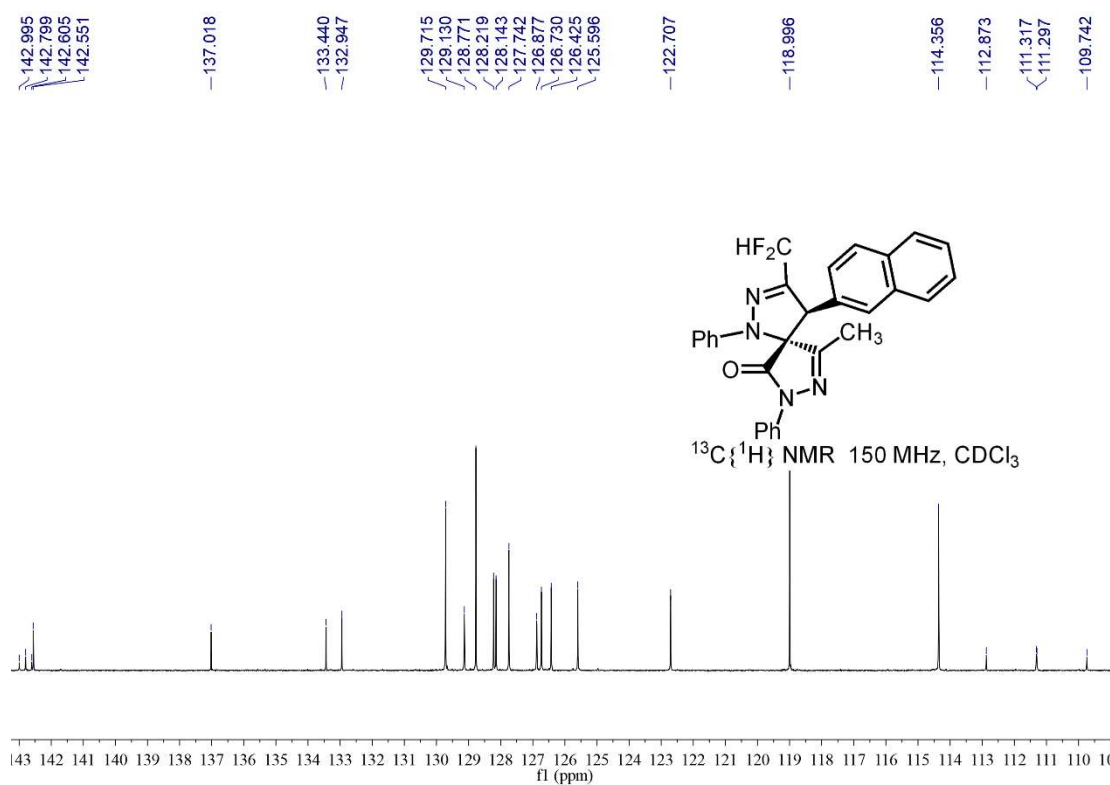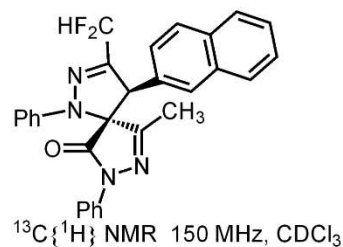

~111.997  
~112.142  
~112.843  
~112.987

~118.130  
~118.272  
~118.975  
~119.117

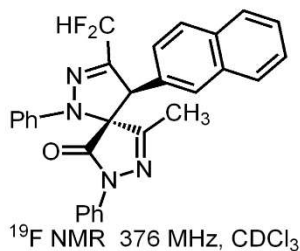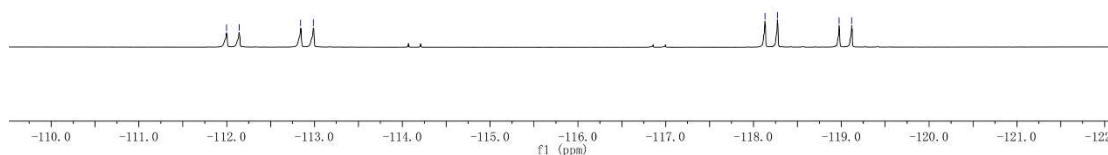

HRMS (ESI) copy of compound (*cis*)-4h:

### Mass Spectrum SmartFormula Report

#### Analysis Info

Analysis Name D:\Data\user\NWNNU-fengyang 20230321--13.d  
Method tune\_low.m  
Sample Name A-341  
Comment

Acquisition Date 2023-3-21 17:05:28  
Operator BDAL@DE  
Instrument / Ser# micrOTOF-Q 20453

#### Acquisition Parameter

|             |          |                       |           |                  |           |
|-------------|----------|-----------------------|-----------|------------------|-----------|
| Source Type | ESI      | Ion Polarity          | Positive  | Set Nebulizer    | 0.4 Bar   |
| Focus       | Active   | Set Capillary         | 4500 V    | Set Dry Heater   | 180 j°C   |
| Scan Begin  | 50 m/z   | Set End Plate Offset  | -500 V    | Set Dry Gas      | 4.0 l/min |
| Scan End    | 1000 m/z | Set Collision Cell RF | 400.0 Vpp | Set Divert Valve | Waste     |

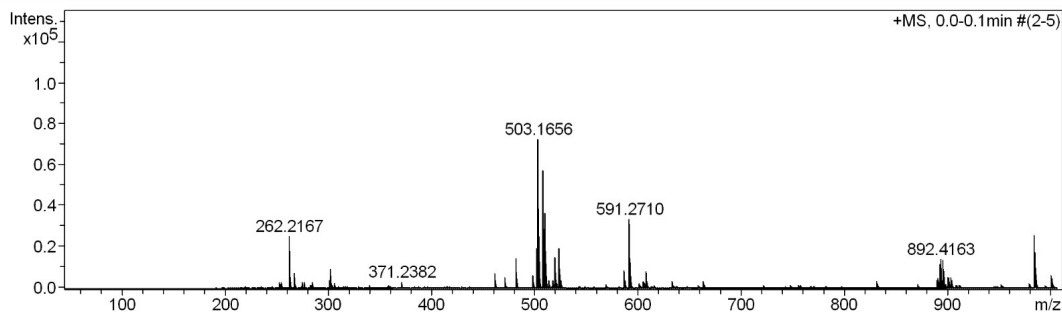

| Meas. #  | Formula                                                             | m/z      | err [ppm] | Me an err [ppm] | rdb  | N-R | e j % Conf | mSi gma | Std l | St d | St d l | St d | St d  | Std Com b Dev |
|----------|---------------------------------------------------------------------|----------|-----------|-----------------|------|-----|------------|---------|-------|------|--------|------|-------|---------------|
| 503.1656 | 1 C <sub>29</sub> H <sub>22</sub> F <sub>2</sub> N <sub>4</sub> NaO | 503.1654 | -0.3      | 0.3             | 19.5 | ok  | even       | 12.2    | 20.9  | 0.6  | 7.5    | 1.5  | 842.7 |               |

NMR copies of compound (*trans*)-4i:

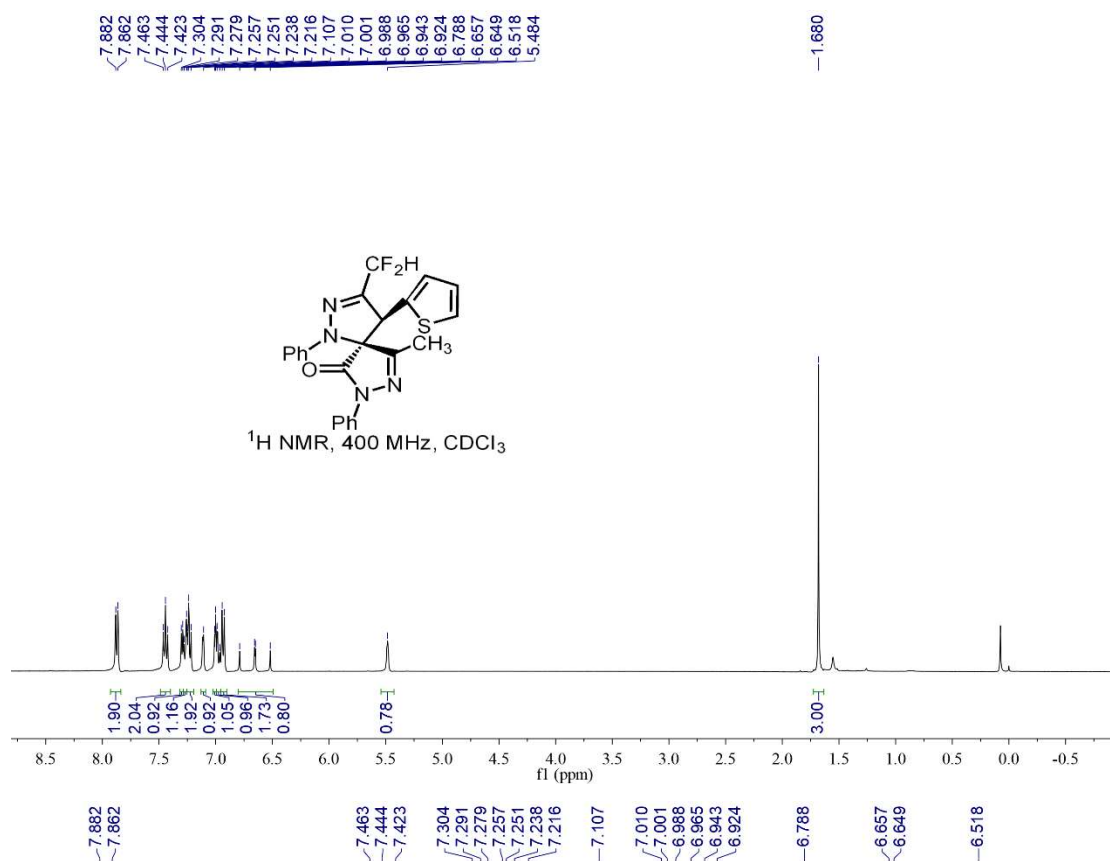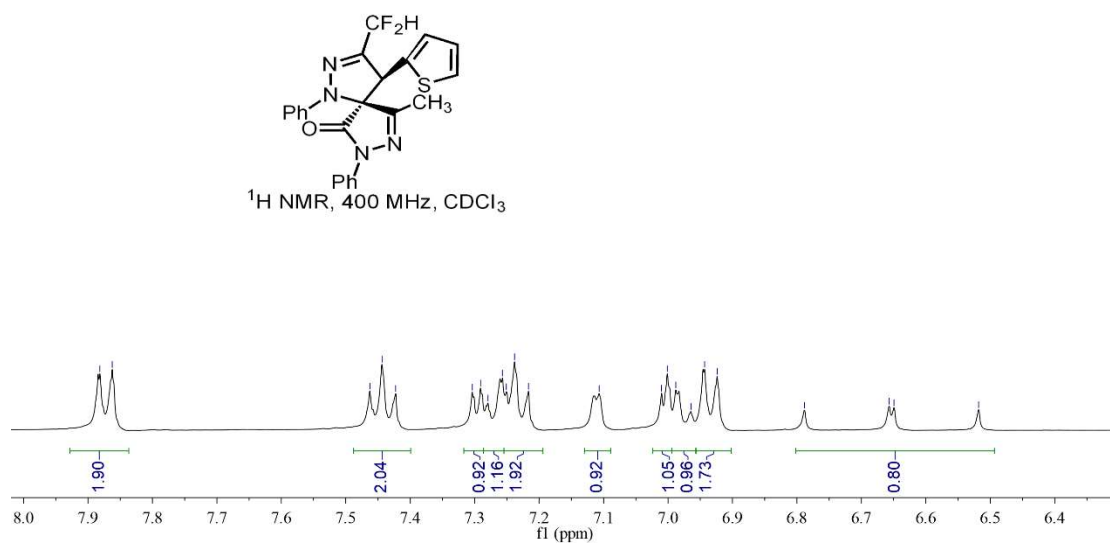

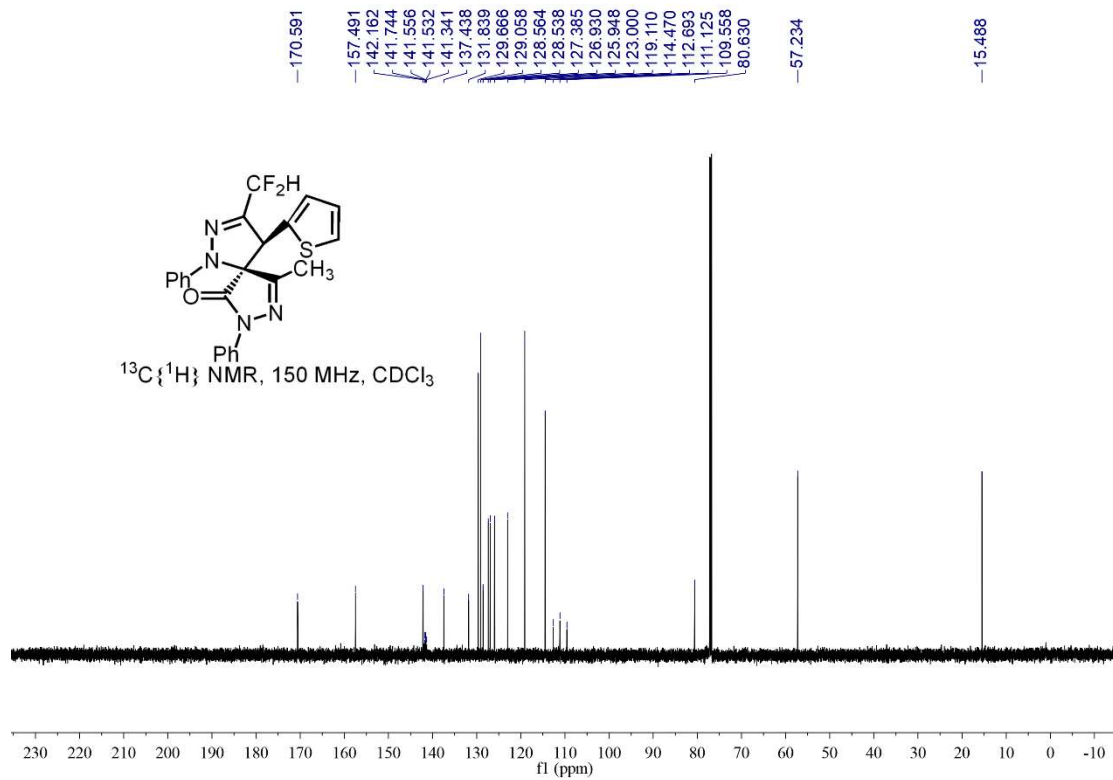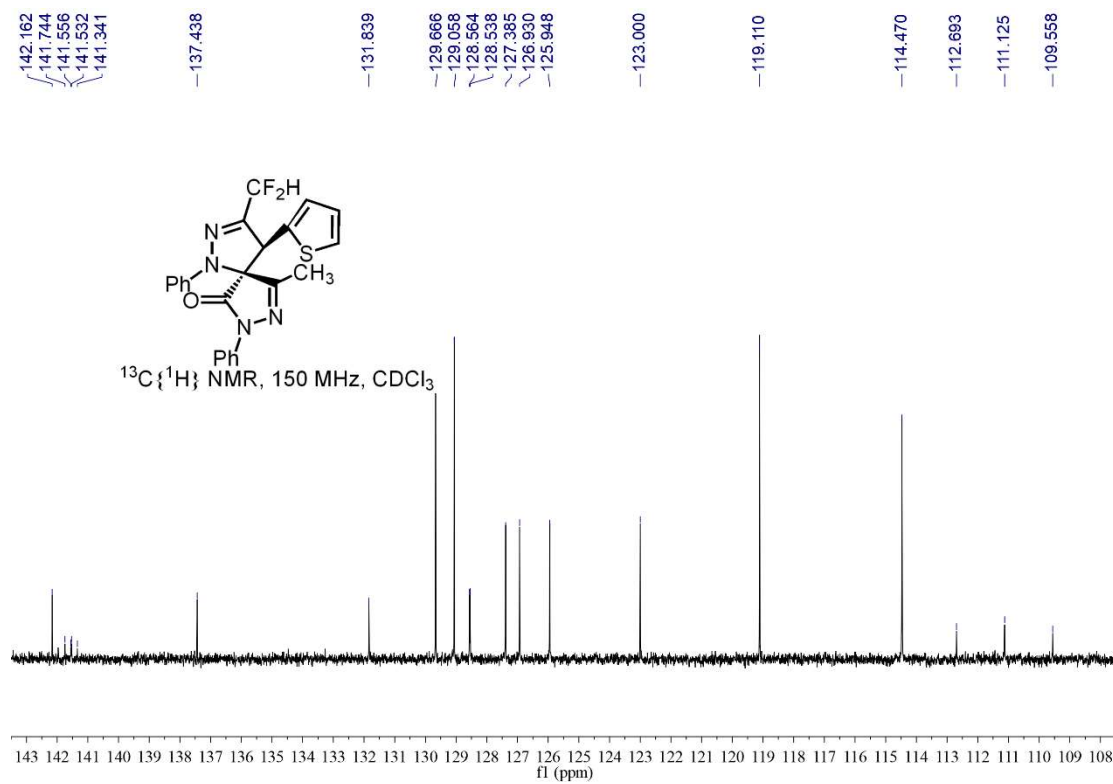

-108.588  
-108.736  
-109.438  
-109.585

-120.904  
-121.043  
-121.753  
-121.893

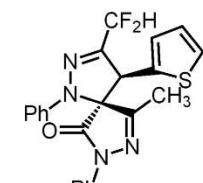

<sup>19</sup>F NMR 376 MHz, CDCl<sub>3</sub>

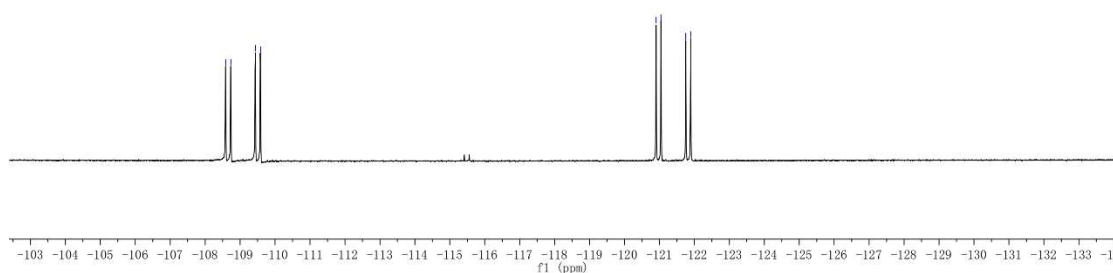

HRMS (ESI) copy of compound (*trans*)-4i:

### Mass Spectrum SmartFormula Report

#### Analysis Info

Analysis Name D:\Data\user\NWNNU-fengyang 20230321--14.d  
Method tune\_low.m  
Sample Name A-32  
Comment

Acquisition Date 2023-3-21 17:08:29

Operator BDAL@DE  
Instrument / Ser# micrOTOF-Q 20453

#### Acquisition Parameter

|             |          |                       |           |                  |           |
|-------------|----------|-----------------------|-----------|------------------|-----------|
| Source Type | ESI      | Ion Polarity          | Positive  | Set Nebulizer    | 0.4 Bar   |
| Focus       | Active   | Set Capillary         | 4500 V    | Set Dry Heater   | 180 i°C   |
| Scan Begin  | 50 m/z   | Set End Plate Offset  | -500 V    | Set Dry Gas      | 4.0 l/min |
| Scan End    | 1000 m/z | Set Collision Cell RF | 400.0 Vpp | Set Divert Valve | Waste     |

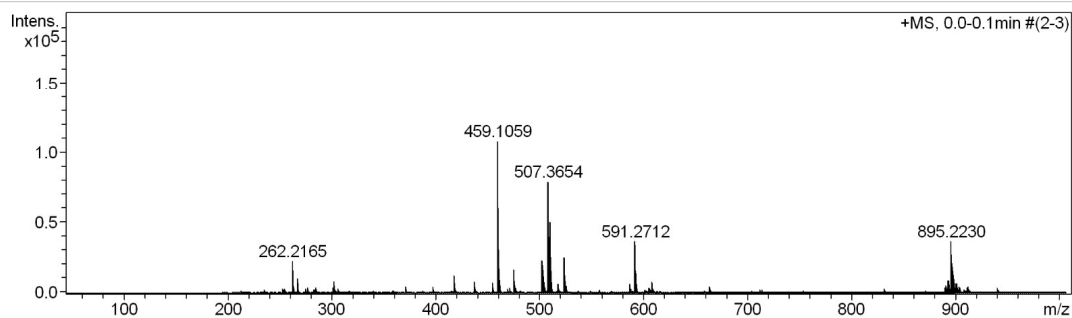

| Meas. #  | Formula                                                            | m/z      | err [ppm] | Me an err [ppm] | rdb  | N-R | e <sub>i</sub> Conf | m Si gm a | Std l | St d | St d l | St d | Std Com b |
|----------|--------------------------------------------------------------------|----------|-----------|-----------------|------|-----|---------------------|-----------|-------|------|--------|------|-----------|
| 459.1059 | C <sub>23</sub> H <sub>18</sub> F <sub>2</sub> N <sub>4</sub> NaOS | 459.1062 | 0.5       | -0.1            | 15.5 | ok  | even                | 6.5       | 11.7  | 1.0  | 3.9    | 2.6  | 842.7     |

NMR copies of compound (*cis*)-4i:

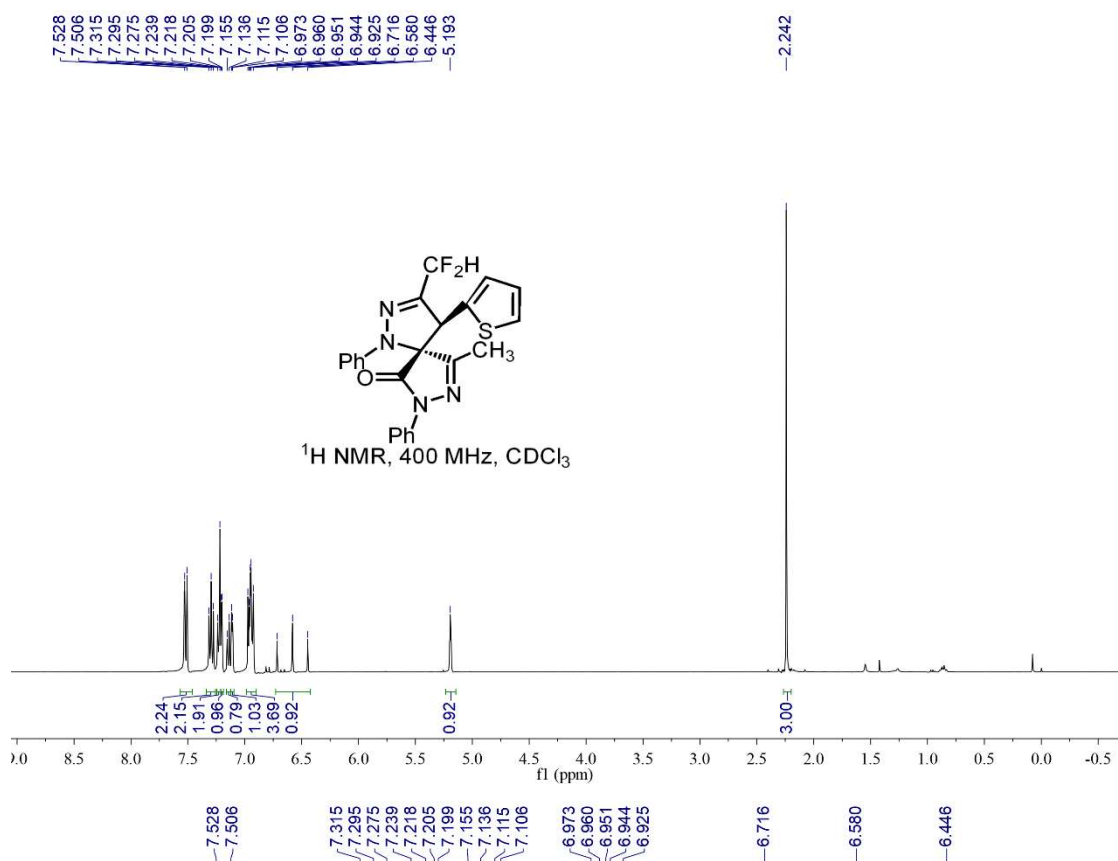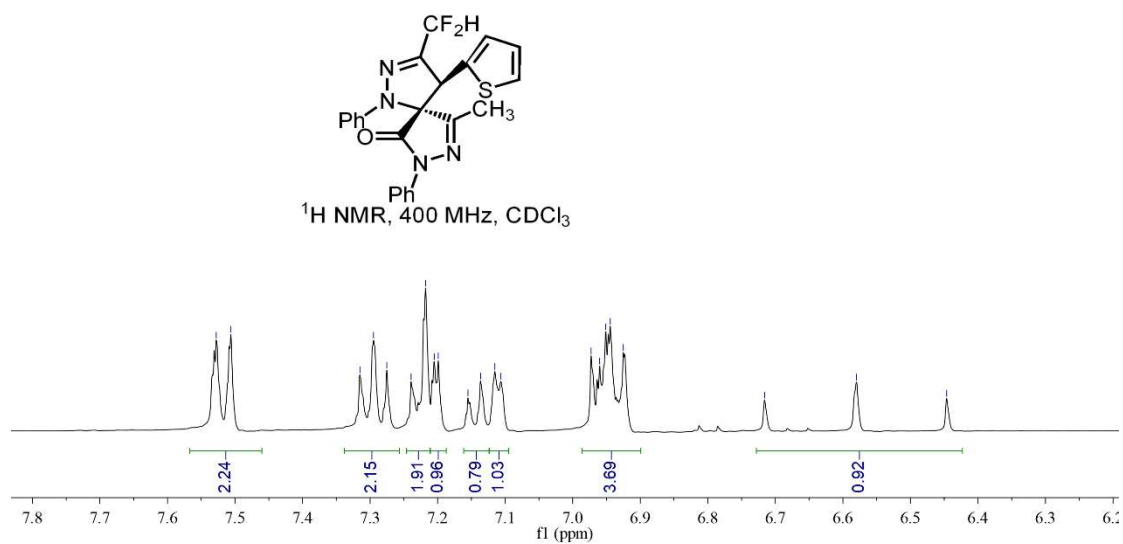

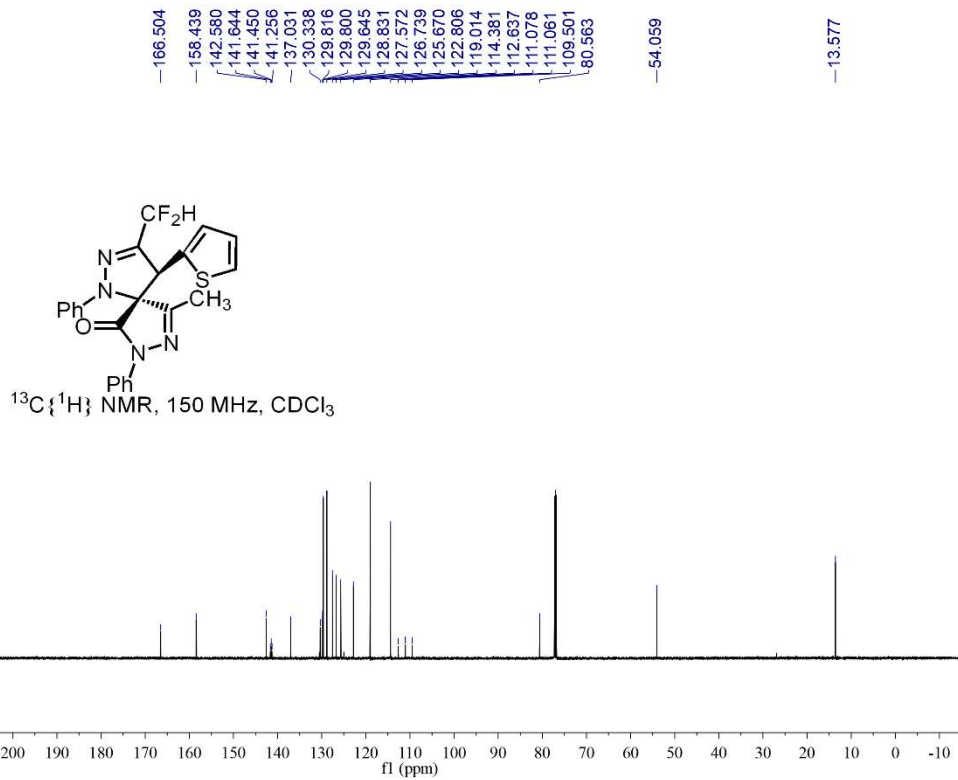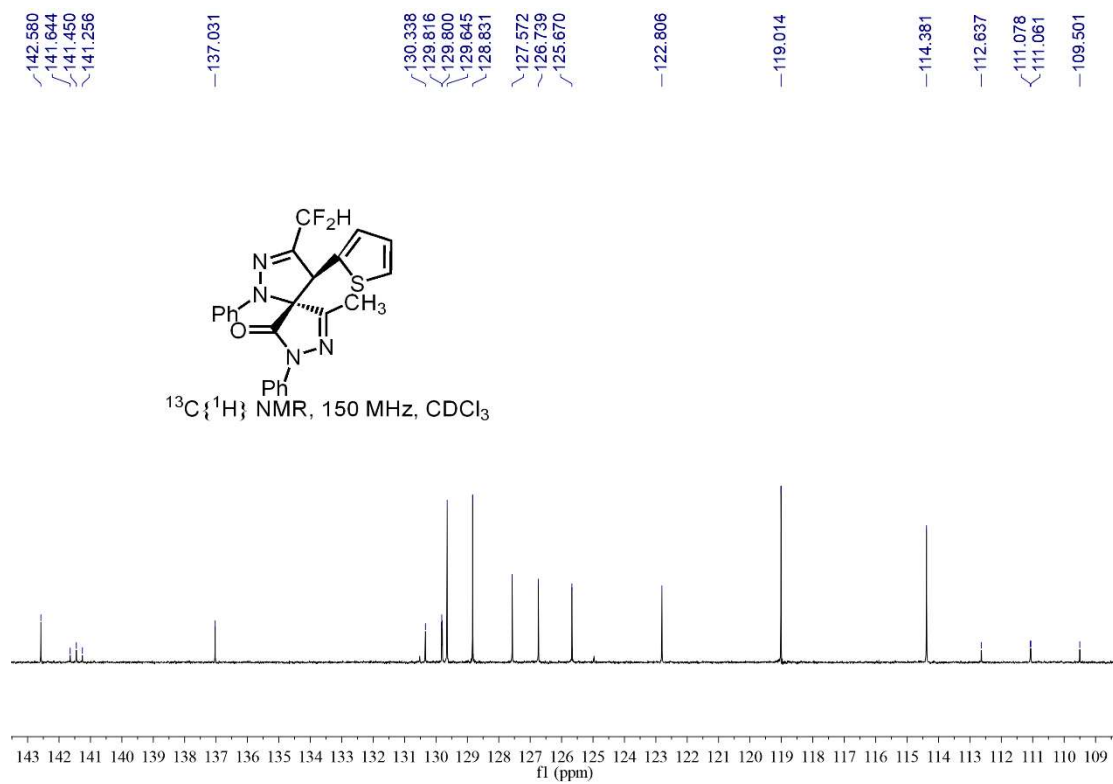

$\sim$ -111.748  
 $\sim$ -111.897  
 $\sim$ -112.596  
 $\sim$ -112.740  
 $\sim$ -119.552  
 $\sim$ -119.693  
 $\sim$ -120.398  
 $\sim$ -120.539

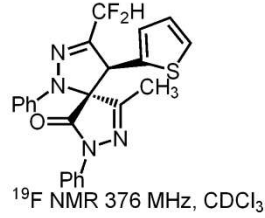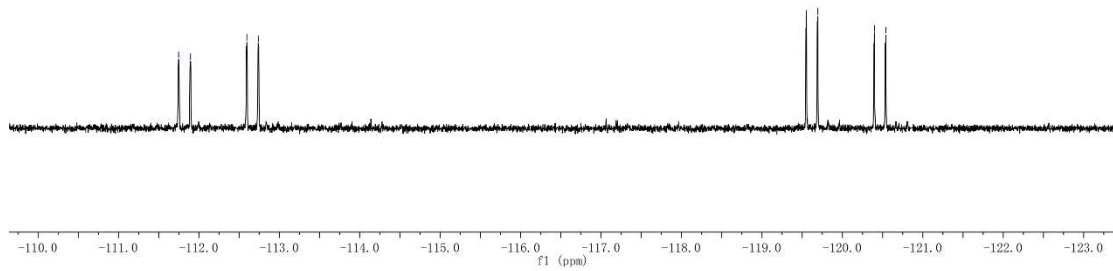

HRMS (ESI) copy of compound (*cis*)-4i:

### Mass Spectrum SmartFormula Report

#### Analysis Info

Analysis Name D:\Data\user\NWNW-fengyang 20230321-15.d  
 Method tune\_low.m  
 Sample Name A-321  
 Comment

Acquisition Date 2023-3-21 17:10:46

Operator BDAL@DE  
 Instrument / Ser# micrOTOF-Q 20453

#### Acquisition Parameter

|             |          |                       |           |                  |           |
|-------------|----------|-----------------------|-----------|------------------|-----------|
| Source Type | ESI      | Ion Polarity          | Positive  | Set Nebulizer    | 0.4 Bar   |
| Focus       | Active   | Set Capillary         | 4500 V    | Set Dry Heater   | 180 jnC   |
| Scan Begin  | 50 m/z   | Set End Plate Offset  | -500 V    | Set Dry Gas      | 4.0 l/min |
| Scan End    | 1000 m/z | Set Collision Cell RF | 400.0 Vpp | Set Divert Valve | Waste     |

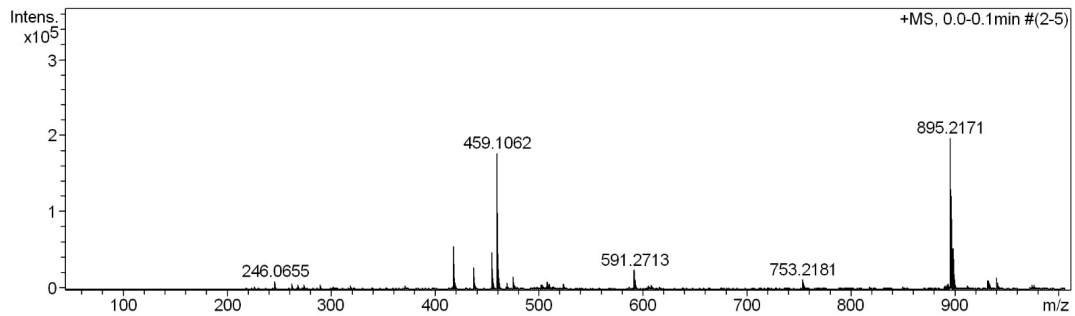

| Meas. #  | Formula                                                              | m/z      | err [ppm] | Me an err [ppm] | rdb  | N-R | e <sub>i</sub> ≠ Con | m Si gm a | Std l | St d | St d l | St d | Std Com b Dev |
|----------|----------------------------------------------------------------------|----------|-----------|-----------------|------|-----|----------------------|-----------|-------|------|--------|------|---------------|
| 459.1062 | 1 C <sub>23</sub> H <sub>18</sub> F <sub>2</sub> N <sub>4</sub> NaOS | 459.1062 | -0.2      | -1.1            | 15.5 | ok  | even                 | 8.1       | 13.2  | 1.5  | 4.5    | 3.9  | 842.7         |



NMR copies of compound (*trans*)-4j:

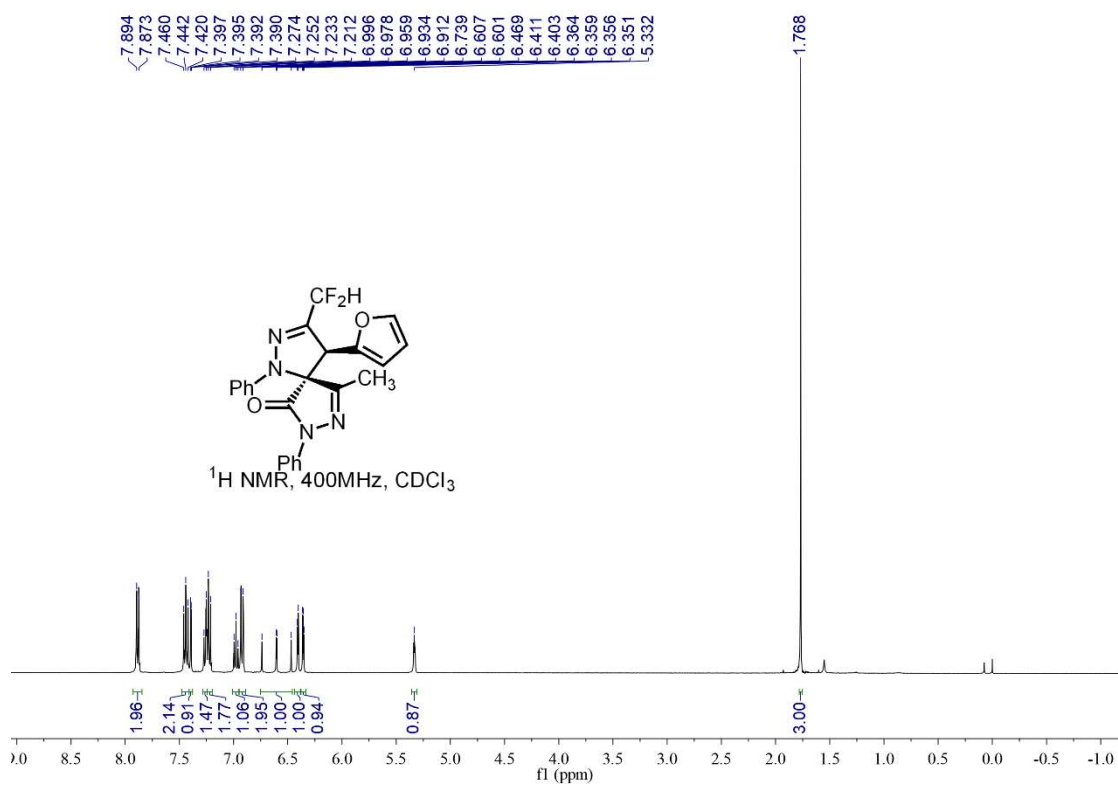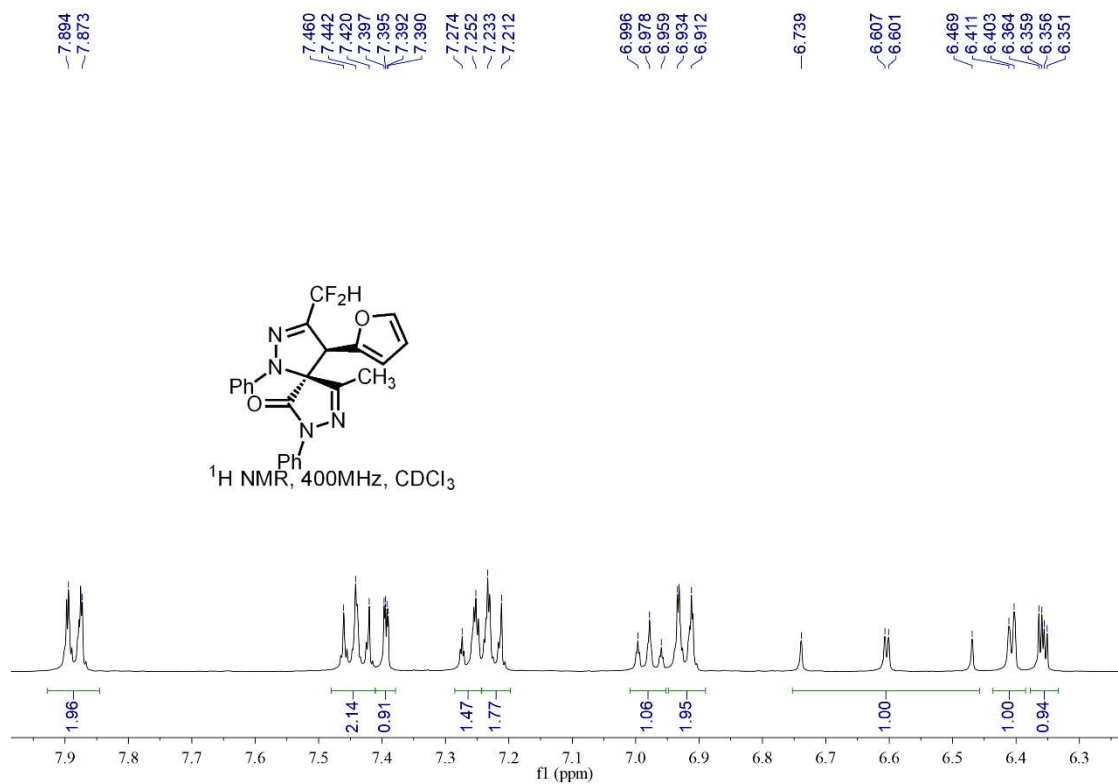

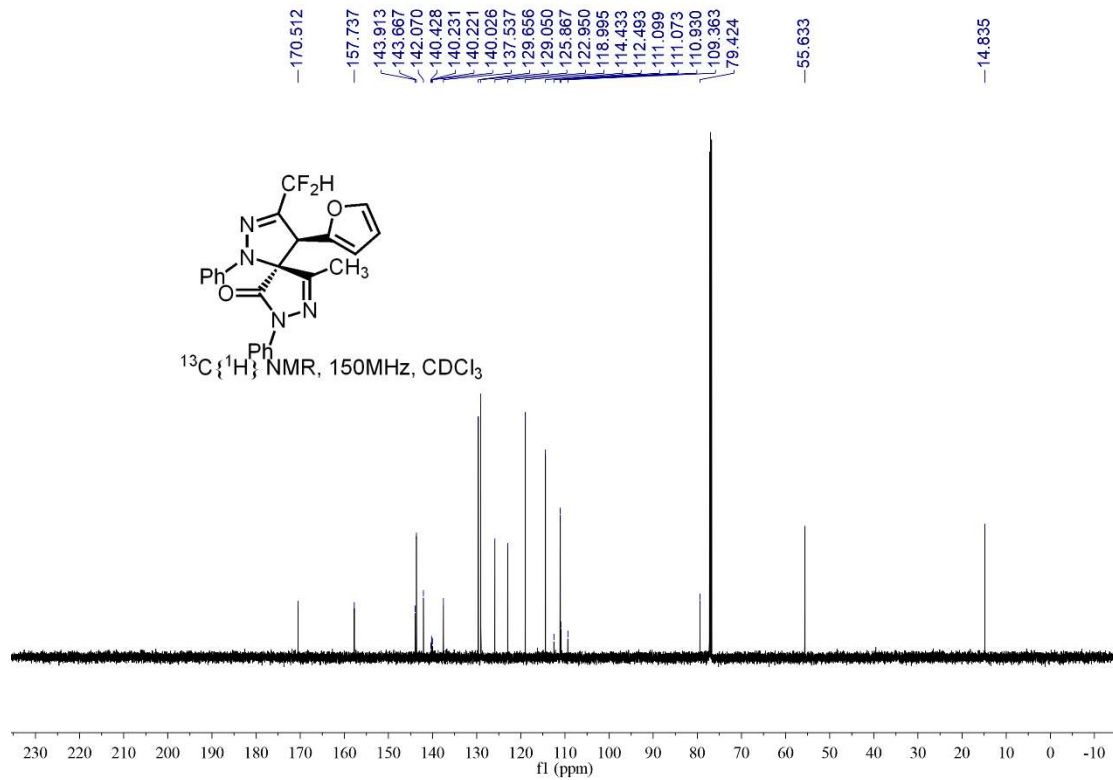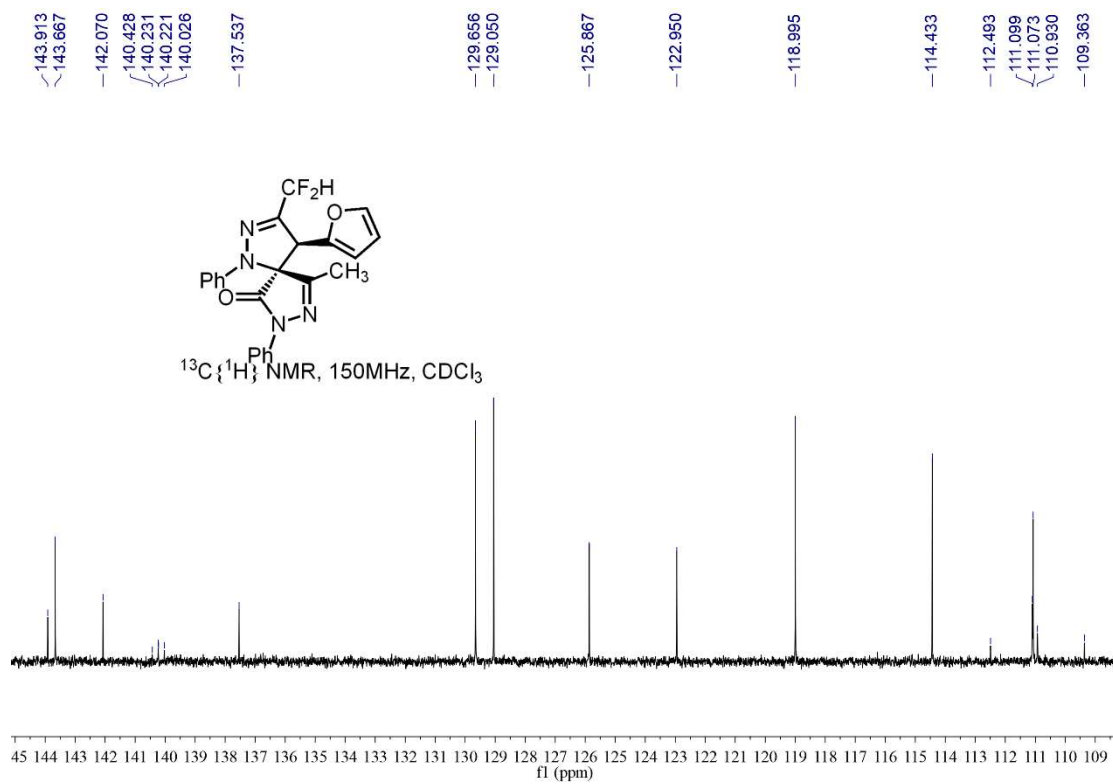

~112.126  
~112.272  
~112.976  
~113.122

~120.699  
~120.839  
~121.549  
~121.689

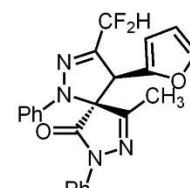

<sup>19</sup>F NMR 376 MHz, CDCl<sub>3</sub>

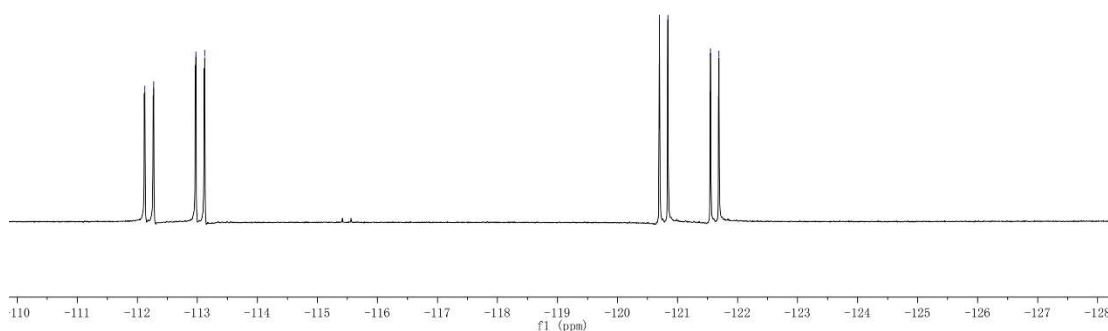

HRMS (ESI) copy of compound (*trans*)-4j:

### Mass Spectrum SmartFormula Report

#### Analysis Info

Analysis Name D:\Data\user\NWNNU-fengyang 20230321-16.d  
Method tune\_low.m  
Sample Name A-33  
Comment

Acquisition Date 2023-3-21 17:13:40

Operator BDAL@DE  
Instrument / Ser# micrOTOF-Q 20453

#### Acquisition Parameter

|             |          |                       |           |                  |           |
|-------------|----------|-----------------------|-----------|------------------|-----------|
| Source Type | ESI      | Ion Polarity          | Positive  | Set Nebulizer    | 0.4 Bar   |
| Focus       | Active   | Set Capillary         | 4500 V    | Set Dry Heater   | 180 j°C   |
| Scan Begin  | 50 m/z   | Set End Plate Offset  | -500 V    | Set Dry Gas      | 4.0 l/min |
| Scan End    | 1000 m/z | Set Collision Cell RF | 400.0 Vpp | Set Divert Valve | Waste     |

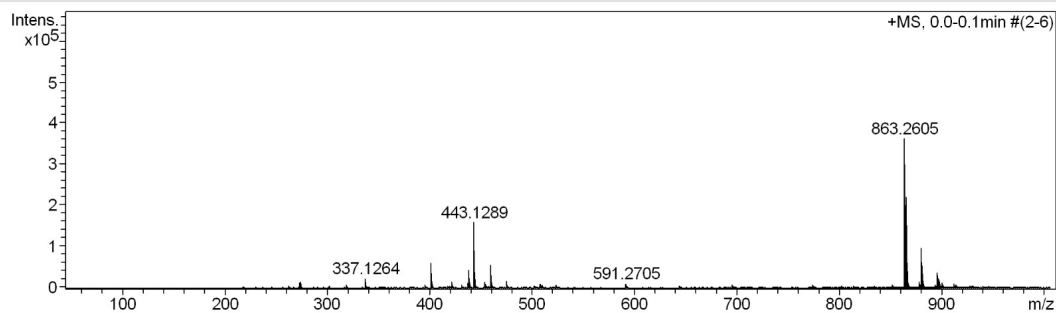

| Meas. #  | Formula                                                                          | m/z      | err [ppm] | Me an err [ppm] | rdb  | N-R | e <sub>i</sub> ≠ Conf | m Sig | Std I | St d | St d I | St d | Std Com |
|----------|----------------------------------------------------------------------------------|----------|-----------|-----------------|------|-----|-----------------------|-------|-------|------|--------|------|---------|
| 443.1289 | 1 C <sub>23</sub> H <sub>18</sub> F <sub>2</sub> N <sub>4</sub> NaO <sub>2</sub> | 443.1290 | 0.2       | -0.1            | 15.5 | ok  | even                  | 9.4   | 14.5  | 0.6  | 6.1    | 1.1  | 842.7   |

NMR copies of compound (*cis*)-4j:

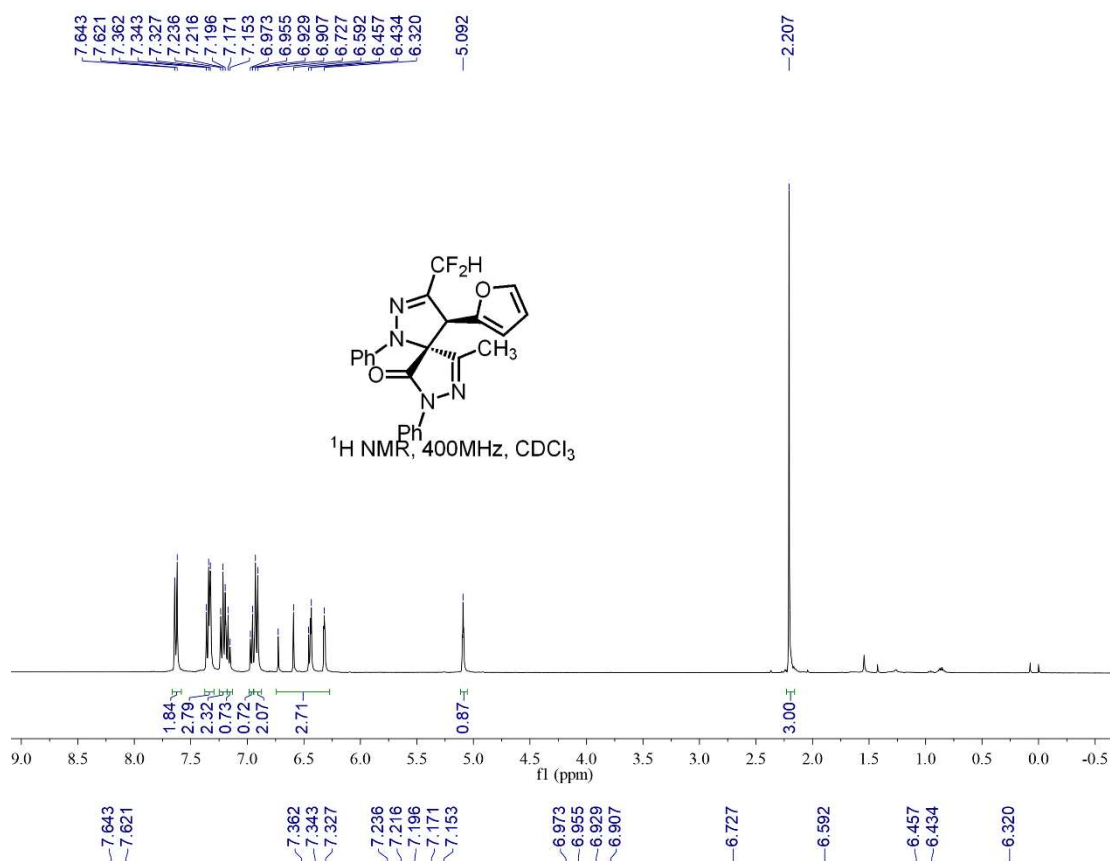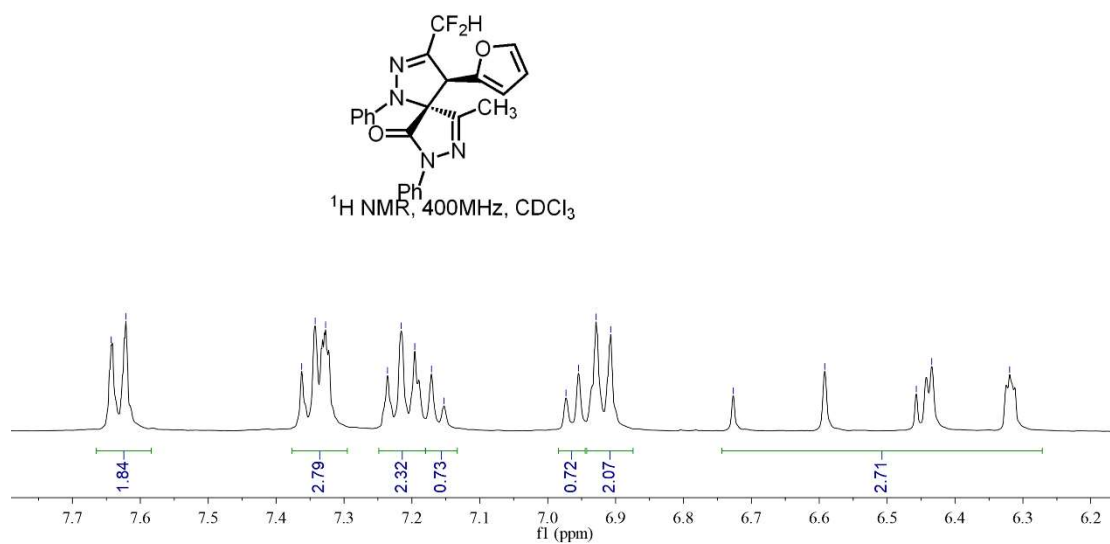

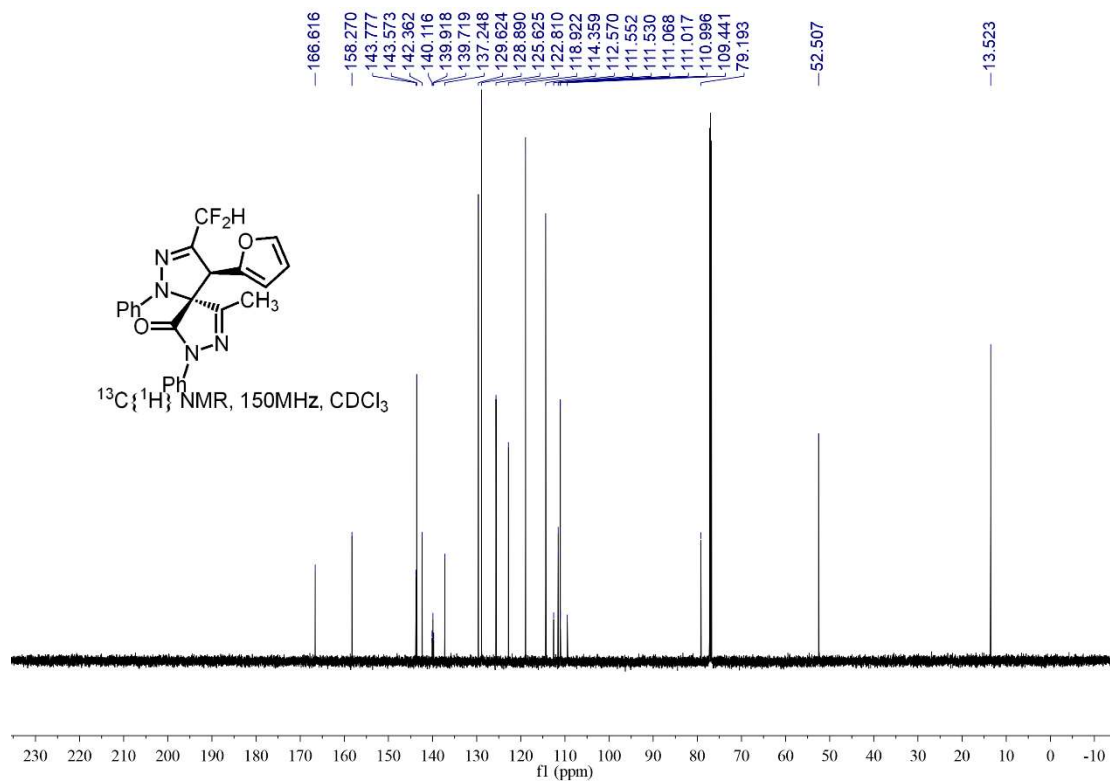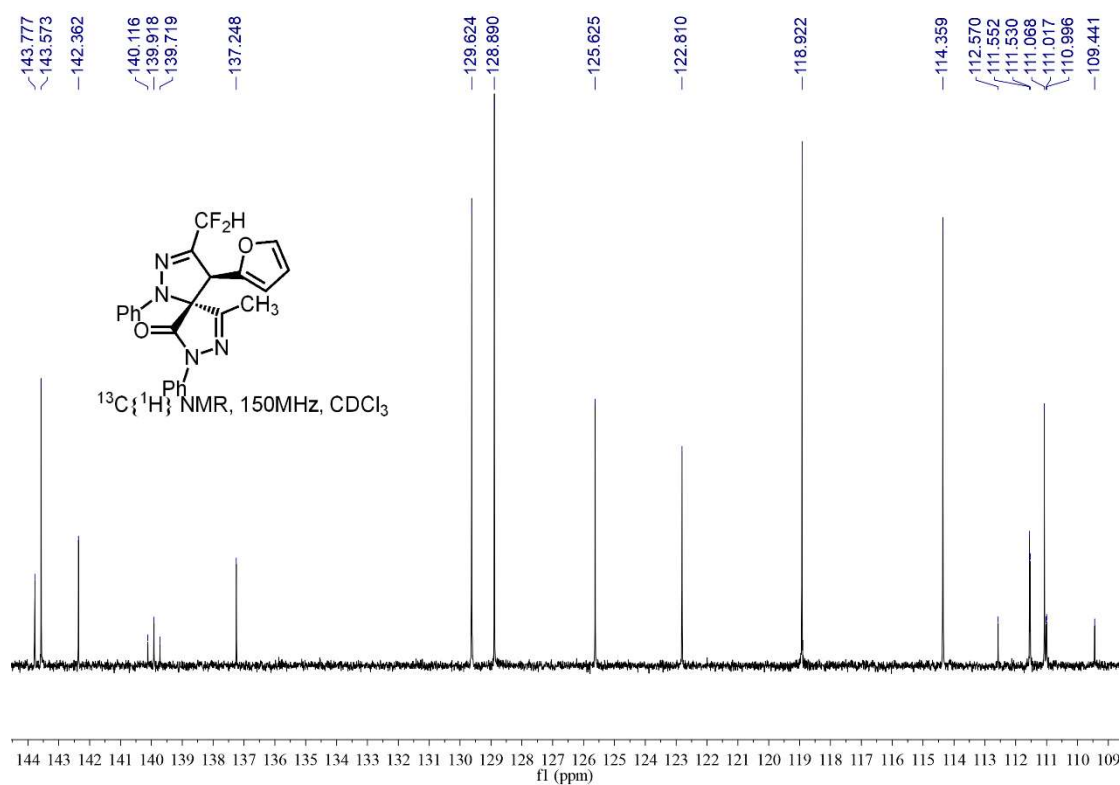

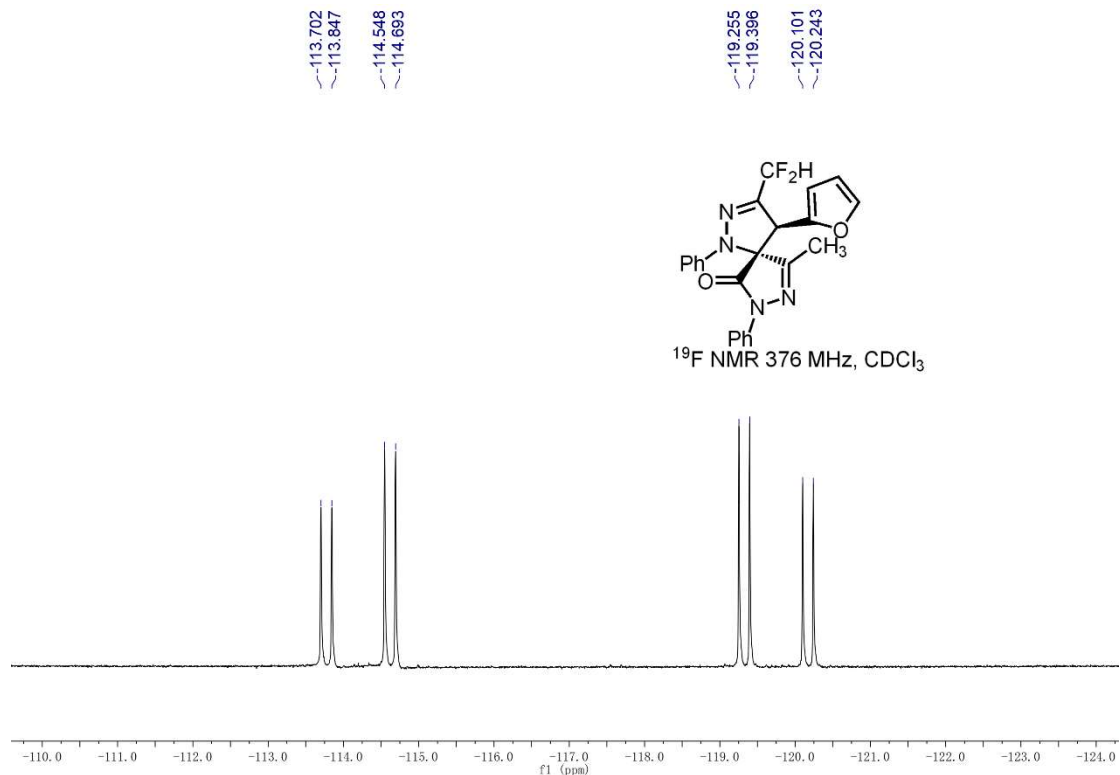

HRMS (ESI) copy of compound (*cis*)-4j:

### Mass Spectrum SmartFormula Report

#### Analysis Info

Analysis Name D:\Data\user\NWN\U-fengyang 20230321-17.d  
 Method tune\_low.m  
 Sample Name A-331  
 Comment

Acquisition Date 2023-3-21 17:15:42  
 Operator BDAL@DE  
 Instrument / Ser# micrOTOF-Q 20453

#### Acquisition Parameter

|             |          |                       |           |                  |           |
|-------------|----------|-----------------------|-----------|------------------|-----------|
| Source Type | ESI      | Ion Polarity          | Positive  | Set Nebulizer    | 0.4 Bar   |
| Focus       | Active   | Set Capillary         | 4500 V    | Set Dry Heater   | 180 j°C   |
| Scan Begin  | 50 m/z   | Set End Plate Offset  | -500 V    | Set Dry Gas      | 4.0 l/min |
| Scan End    | 1000 m/z | Set Collision Cell RF | 400.0 Vpp | Set Divert Valve | Waste     |

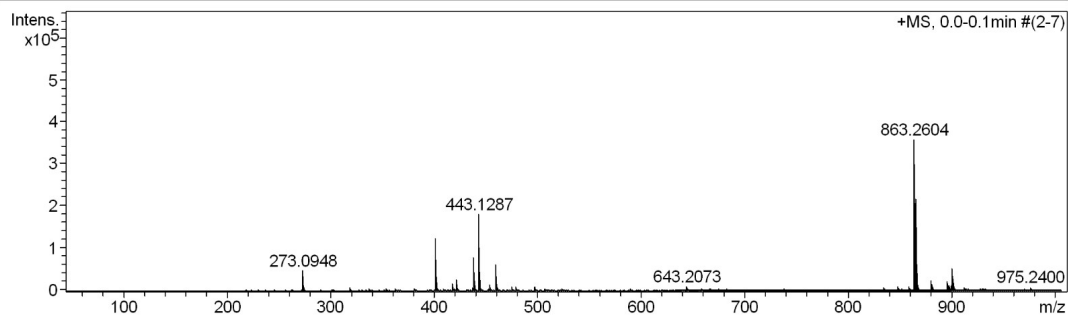

| Meas. #  | Formula                                                                          | m/z      | err [ppm] | Me an err [ppm] | rdb  | N-R | e j ≠ Conf | mSi gm a | Std l | St d Me an z | St d l rN or m | St d m/ Dif f | Std Com b Dev |
|----------|----------------------------------------------------------------------------------|----------|-----------|-----------------|------|-----|------------|----------|-------|--------------|----------------|---------------|---------------|
| 443.1287 | 1 C <sub>23</sub> H <sub>18</sub> F <sub>2</sub> N <sub>4</sub> NaO <sub>2</sub> | 443.1290 | 0.8       | 0.4             | 15.5 | ok  | even       | 12.7     | 19.0  | 0.5          | 8.2            | 1.0           | 842.7         |

NMR copies of compound (*trans*)-4I:

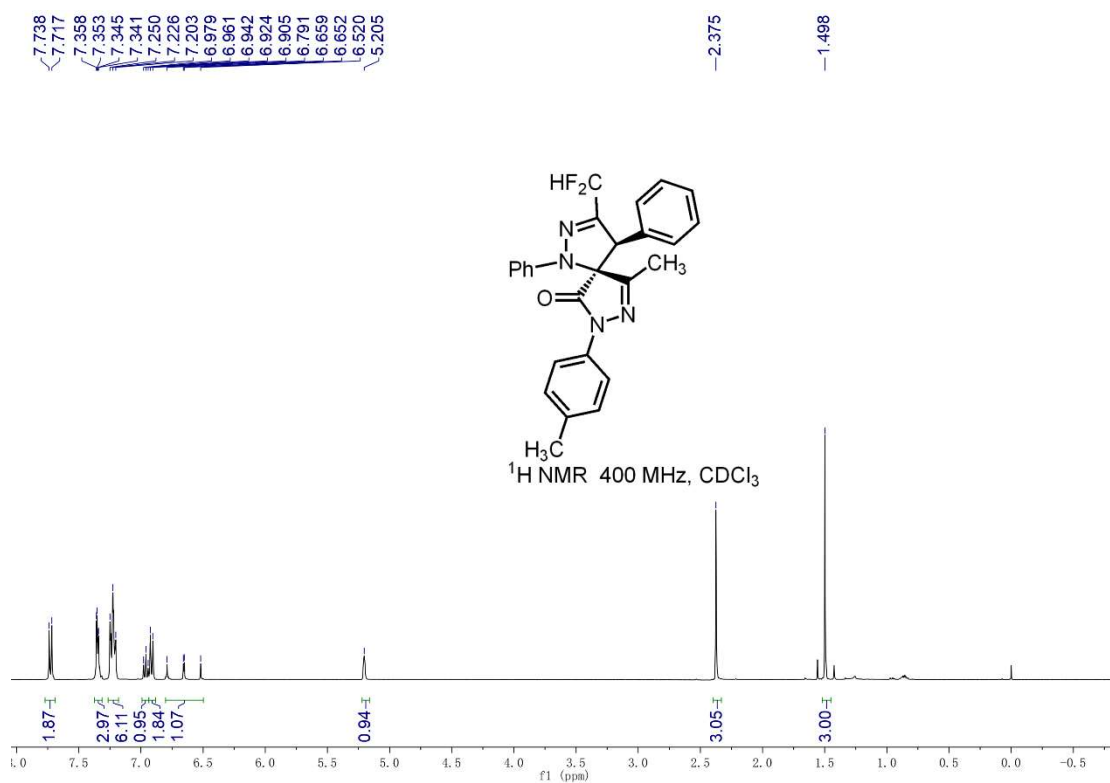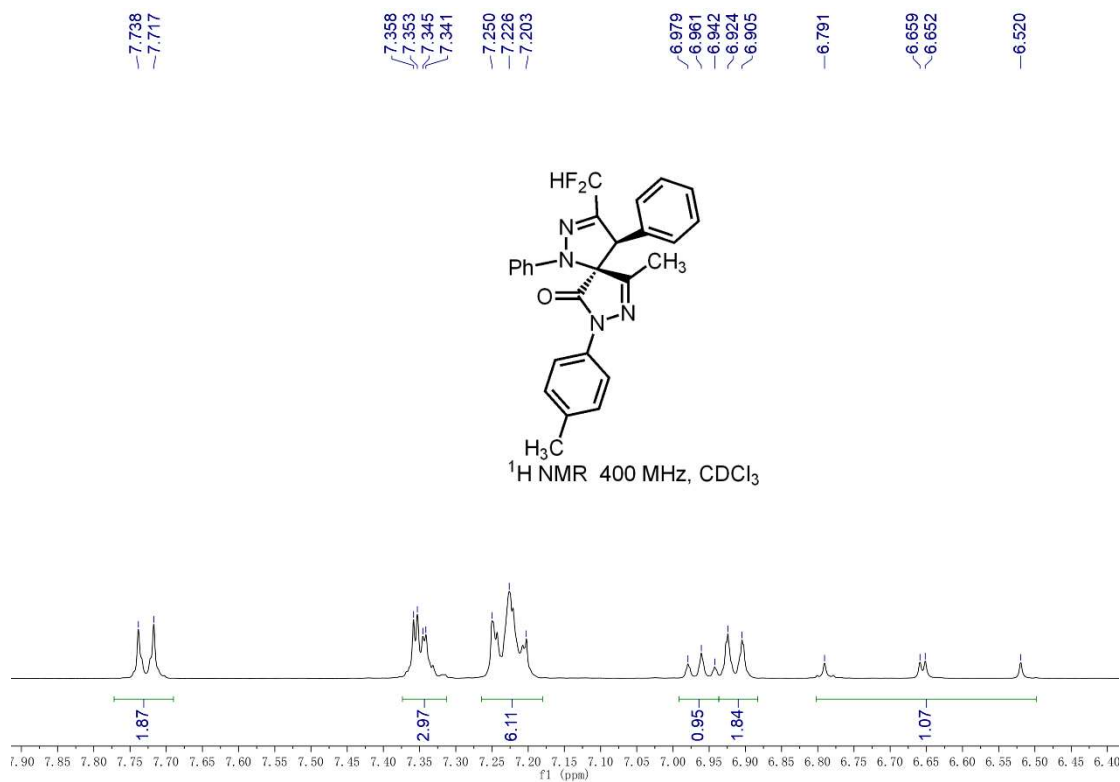

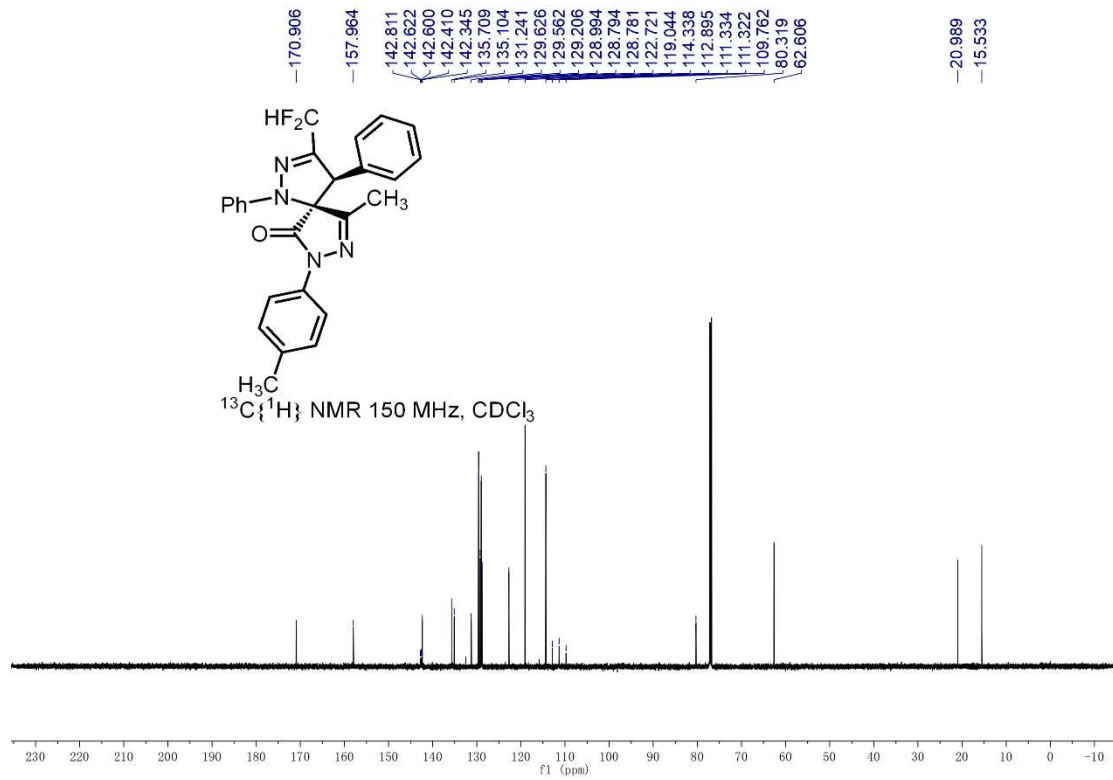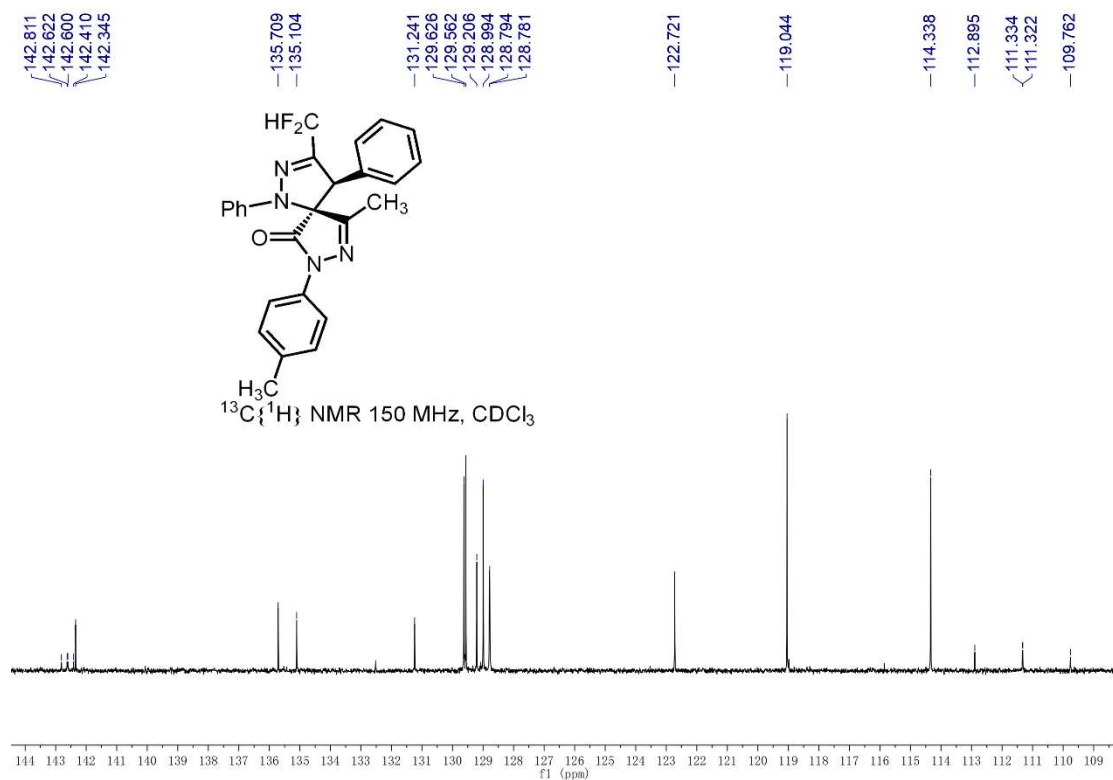



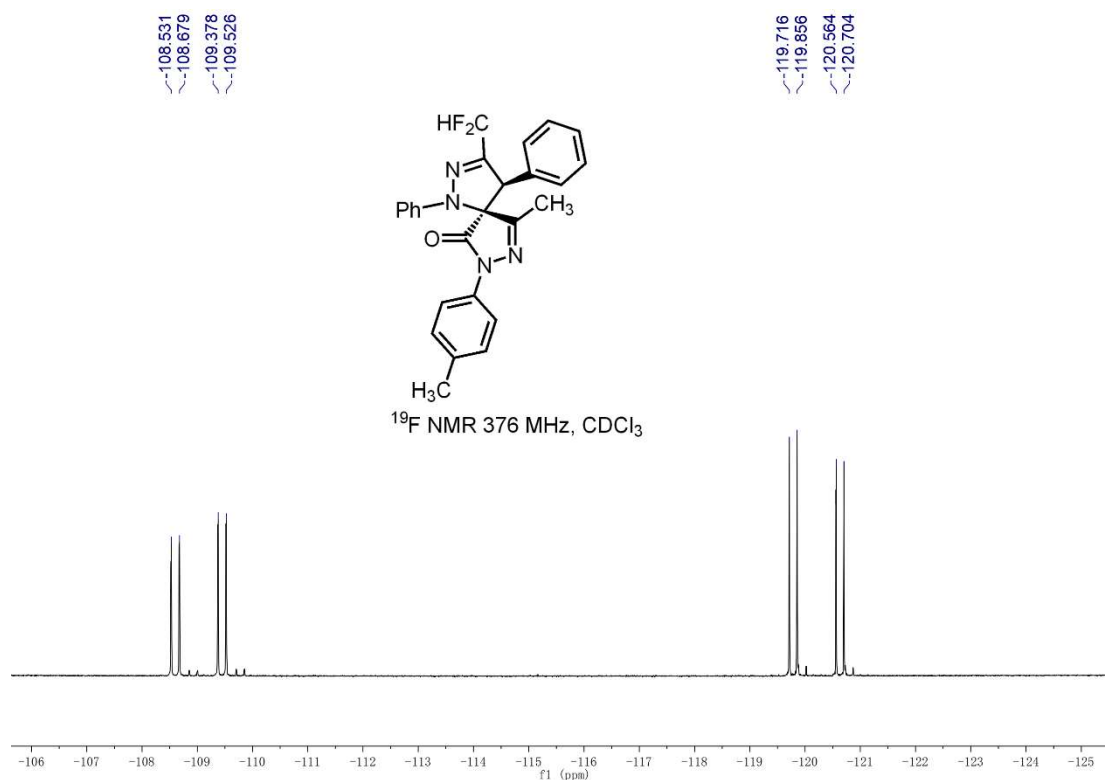

HRMS (ESI) copy of compound (*trans*)-4l:

### Mass Spectrum SmartFormula Report

**Analysis Info**

Analysis Name D:\Data\user\NWN\U-fengyang 20230321-18.d  
 Method tune\_low.m  
 Sample Name A-53  
 Comment

Acquisition Date 2023-3-21 17:18:49  
 Operator BDAL@DE  
 Instrument / Ser# micrOTOF-Q 20453

**Acquisition Parameter**

|             |          |                       |           |                  |           |
|-------------|----------|-----------------------|-----------|------------------|-----------|
| Source Type | ESI      | Ion Polarity          | Positive  | Set Nebulizer    | 0.4 Bar   |
| Focus       | Active   | Set Capillary         | 4500 V    | Set Dry Heater   | 180 j°C   |
| Scan Begin  | 50 m/z   | Set End Plate Offset  | -500 V    | Set Dry Gas      | 4.0 l/min |
| Scan End    | 1000 m/z | Set Collision Cell RF | 400.0 Vpp | Set Divert Valve | Waste     |

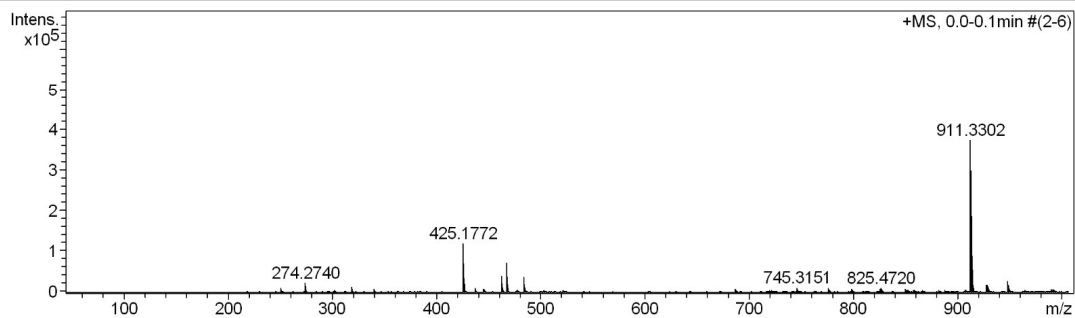

| Meas. m/z | # | Formula                                                           | m/z      | err [ppm] | Me an err [ppm] | rdb  | N-R | ej#  | Conf | mS  | Std | Std | Std | Std  | Std   |
|-----------|---|-------------------------------------------------------------------|----------|-----------|-----------------|------|-----|------|------|-----|-----|-----|-----|------|-------|
|           |   |                                                                   |          |           |                 |      |     |      |      |     | l   | Me  | l   | m/   | Std   |
|           |   |                                                                   |          |           |                 |      |     |      |      |     |     | an  | Val | z    | Dev   |
|           |   |                                                                   |          |           |                 |      |     |      |      |     |     | m/  | rN  | Diff |       |
| 467.1651  | 1 | C <sub>26</sub> H <sub>22</sub> F <sub>2</sub> N <sub>4</sub> NaO | 467.1654 | 0.7       | 0.6             | 16.5 | ok  | even |      | 5.7 | 8.3 | 0.3 | 3.5 | 0.2  | 842.7 |

NMR copies of compound (*cis*)-41:

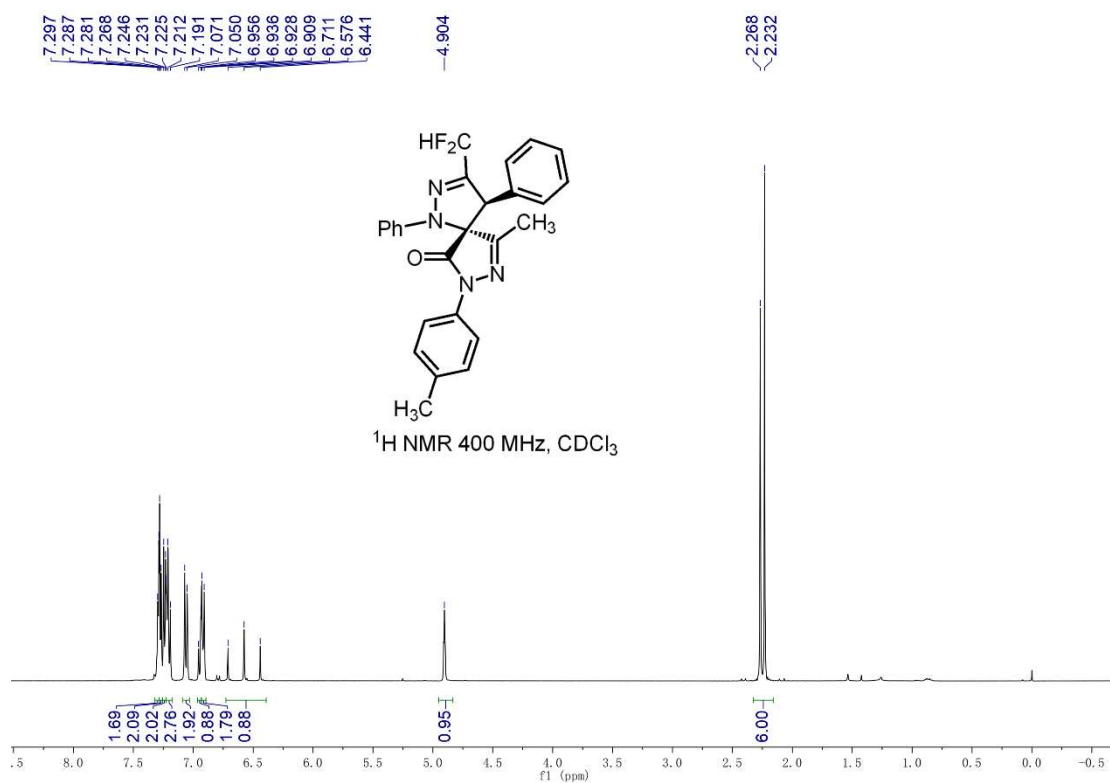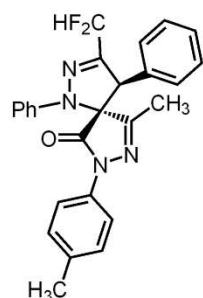

<sup>1</sup>H NMR 400 MHz, CDCl<sub>3</sub>

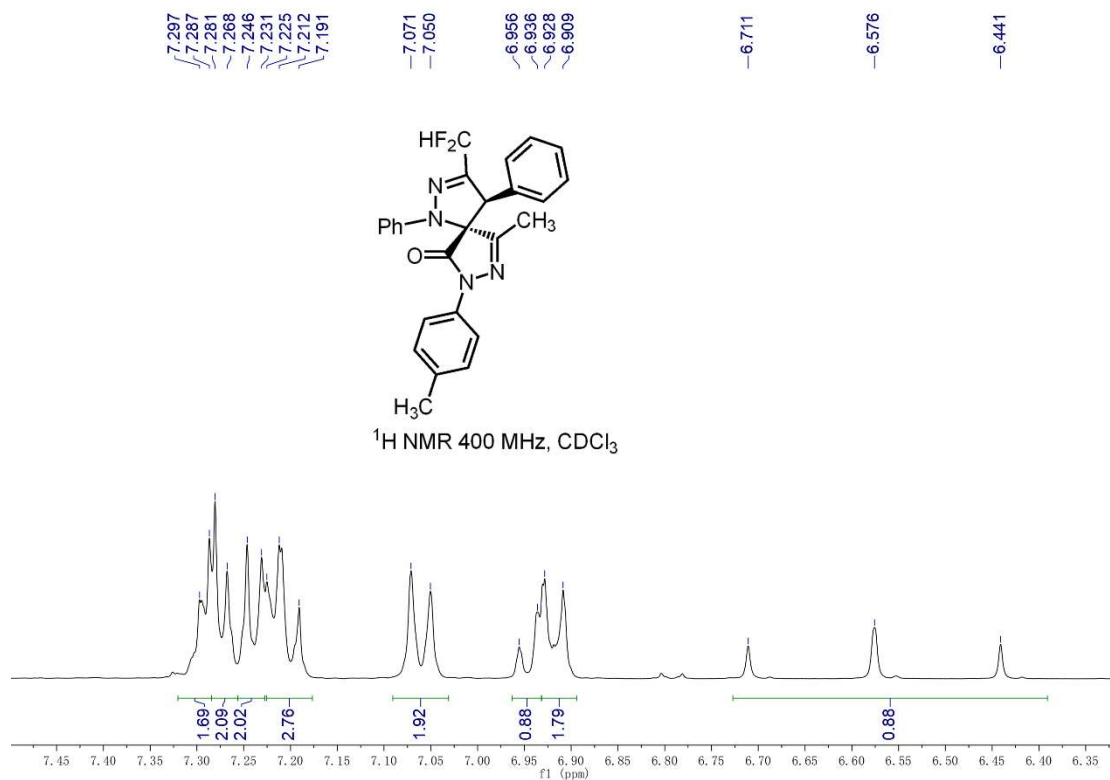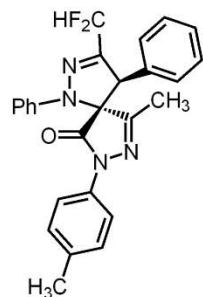

<sup>1</sup>H NMR 400 MHz, CDCl<sub>3</sub>

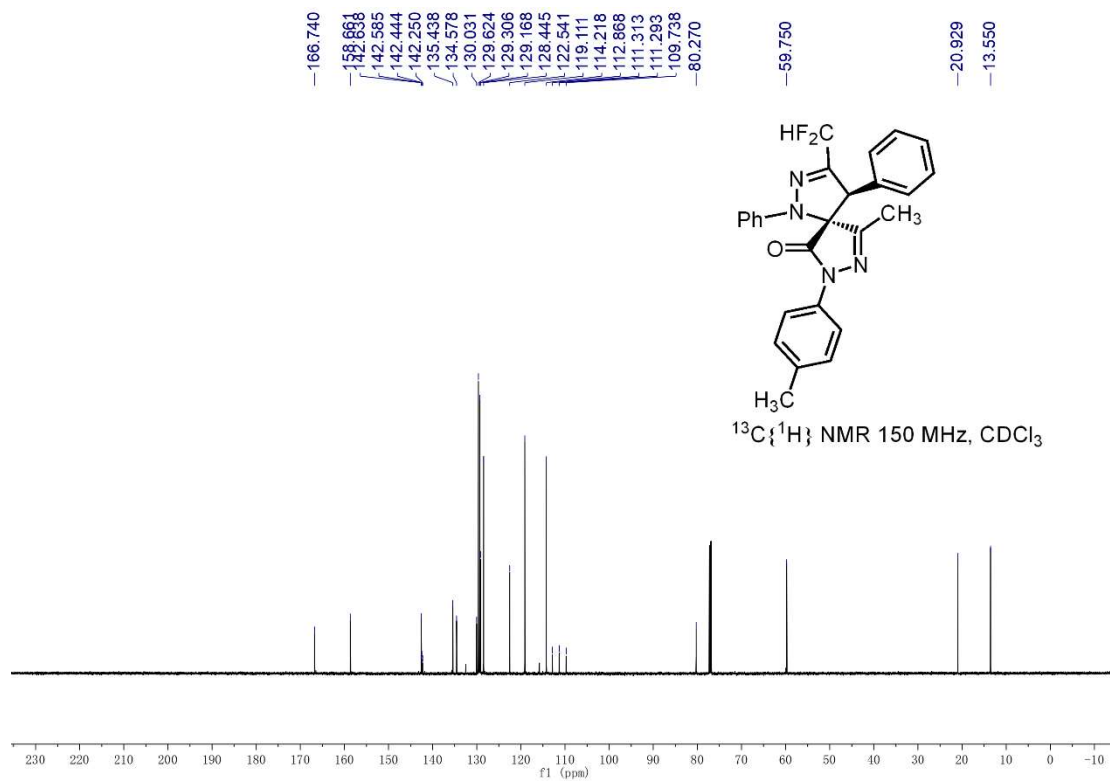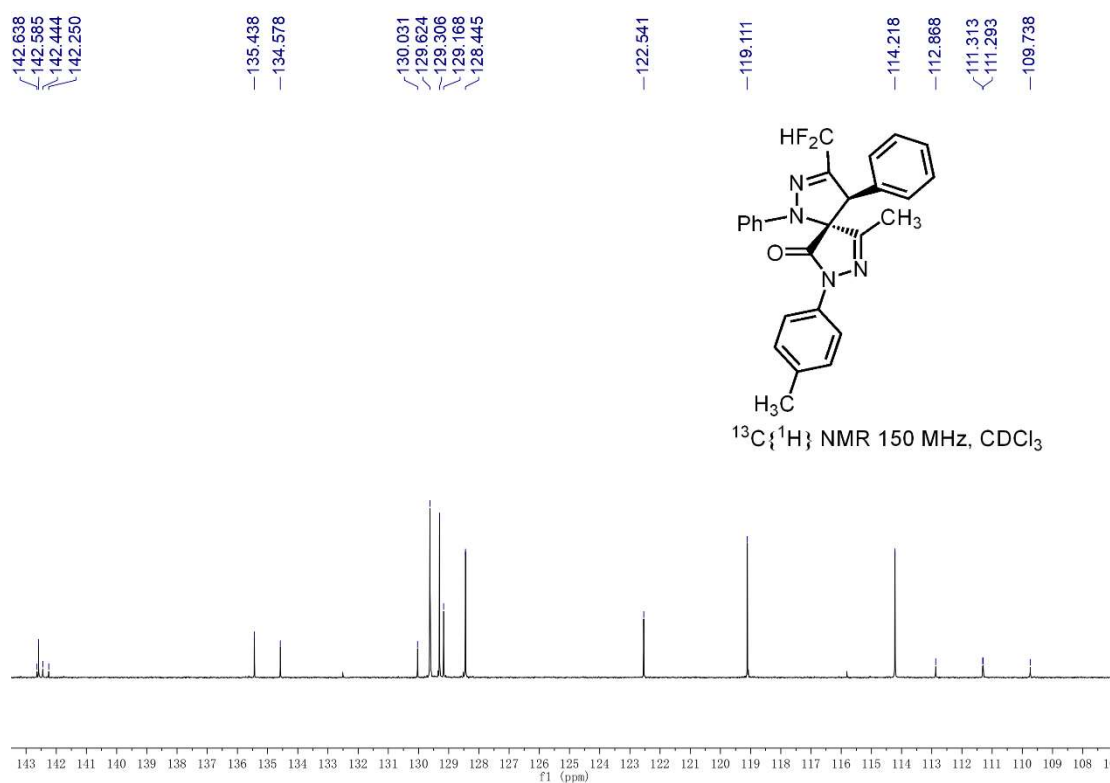

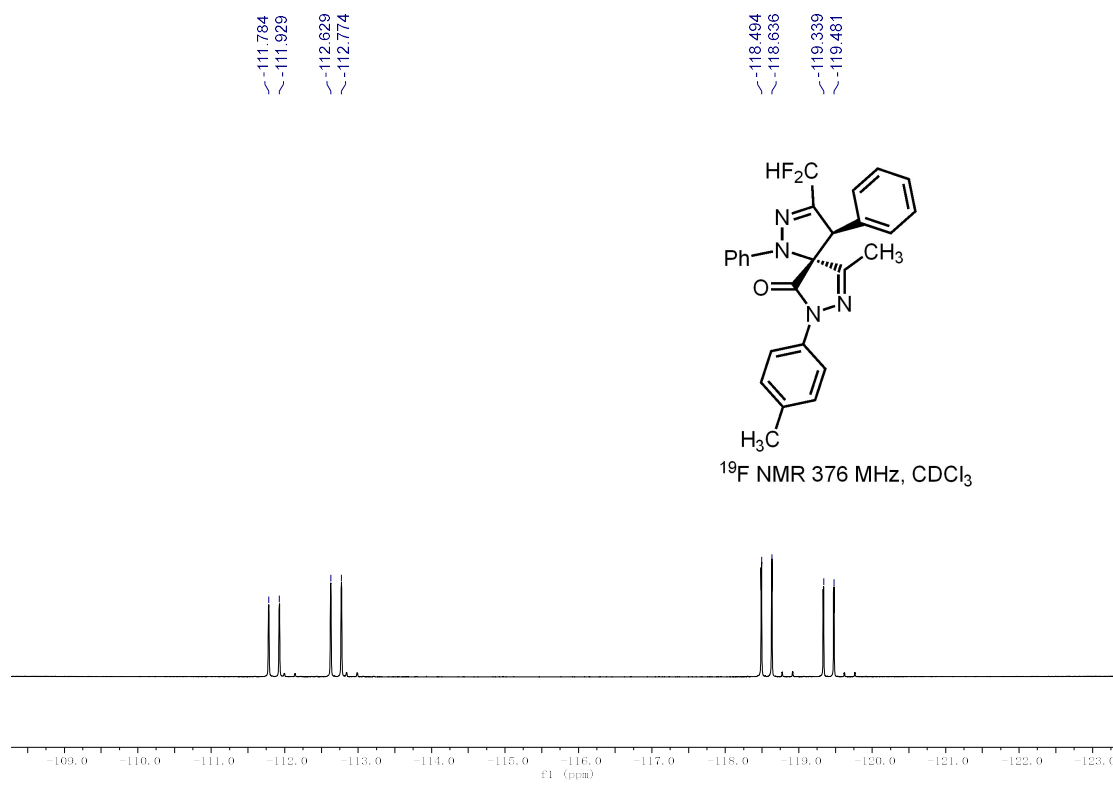

HRMS (ESI) copy of compound (*cis*)-4l:

### Mass Spectrum SmartFormula Report

**Analysis Info**

Analysis Name D:\Data\user\NWNW-fengyang 20230321-19.d  
 Method tune\_low.m  
 Sample Name A-531  
 Comment

Acquisition Date 2023-3-21 17:20:51  
 Operator BDAL@DE  
 Instrument / Ser# micrOTOF-Q 20453

**Acquisition Parameter**

|             |          |                       |           |                  |                     |
|-------------|----------|-----------------------|-----------|------------------|---------------------|
| Source Type | ESI      | Ion Polarity          | Positive  | Set Nebulizer    | 0.4 Bar             |
| Focus       | Active   | Set Capillary         | 4500 V    | Set Dry Heater   | 180 $\mu\text{A}$ C |
| Scan Begin  | 50 m/z   | Set End Plate Offset  | -500 V    | Set Dry Gas      | 4.0 l/min           |
| Scan End    | 1000 m/z | Set Collision Cell RF | 400.0 Vpp | Set Divert Valve | Waste               |

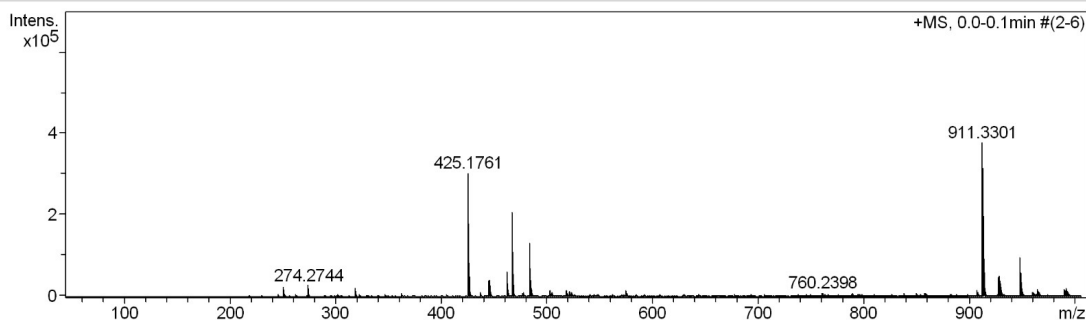

| Meas. #  | Formula                                                             | m/z      | err [ppm] | Me an err [ppm] | rdb  | N-R | e <sub>i</sub> ≠ Conf | mSi gma | Std l | St d Me an z | Std l Var m/ m/ | St d Nor m/ m/ | St d Dif f | Std Com b Dev |
|----------|---------------------------------------------------------------------|----------|-----------|-----------------|------|-----|-----------------------|---------|-------|--------------|-----------------|----------------|------------|---------------|
| 467.1650 | 1 C <sub>26</sub> H <sub>22</sub> F <sub>2</sub> N <sub>4</sub> NaO | 467.1654 | 0.9       | 0.7             | 16.5 | ok  | even                  | 20.0    | 29.8  | 0.4          | 12.7            | 0.6            | 842.7      |               |

NMR copies of compound (*trans*)-4m:

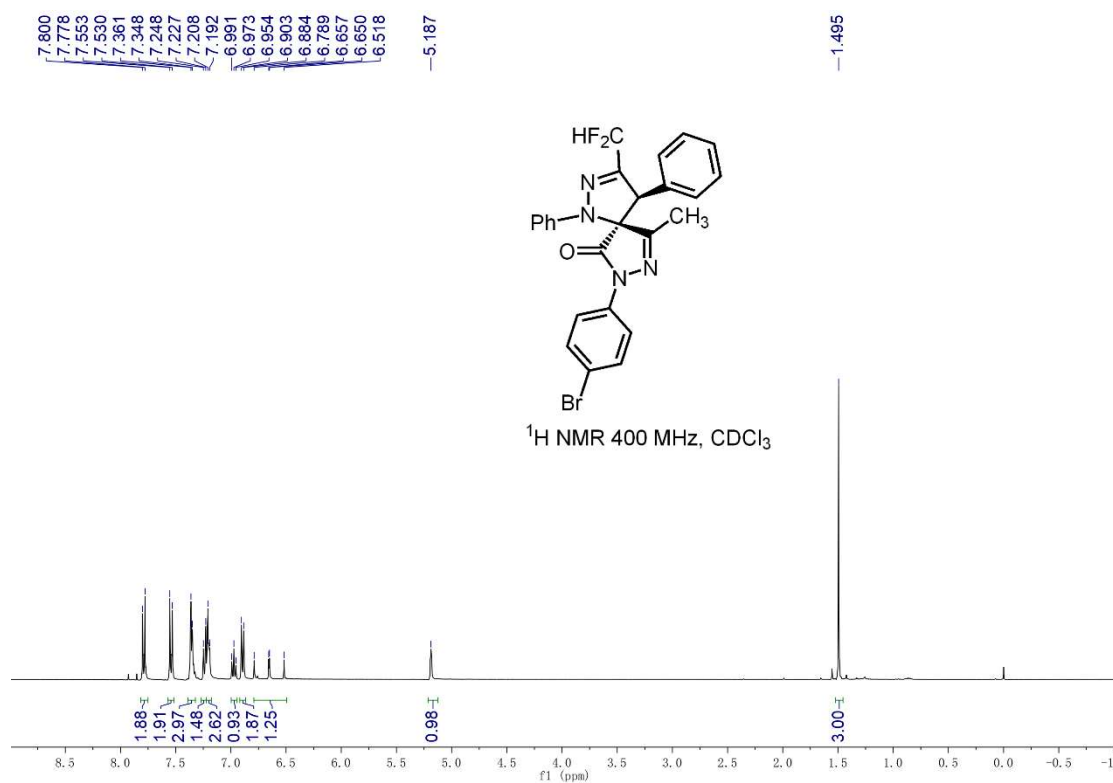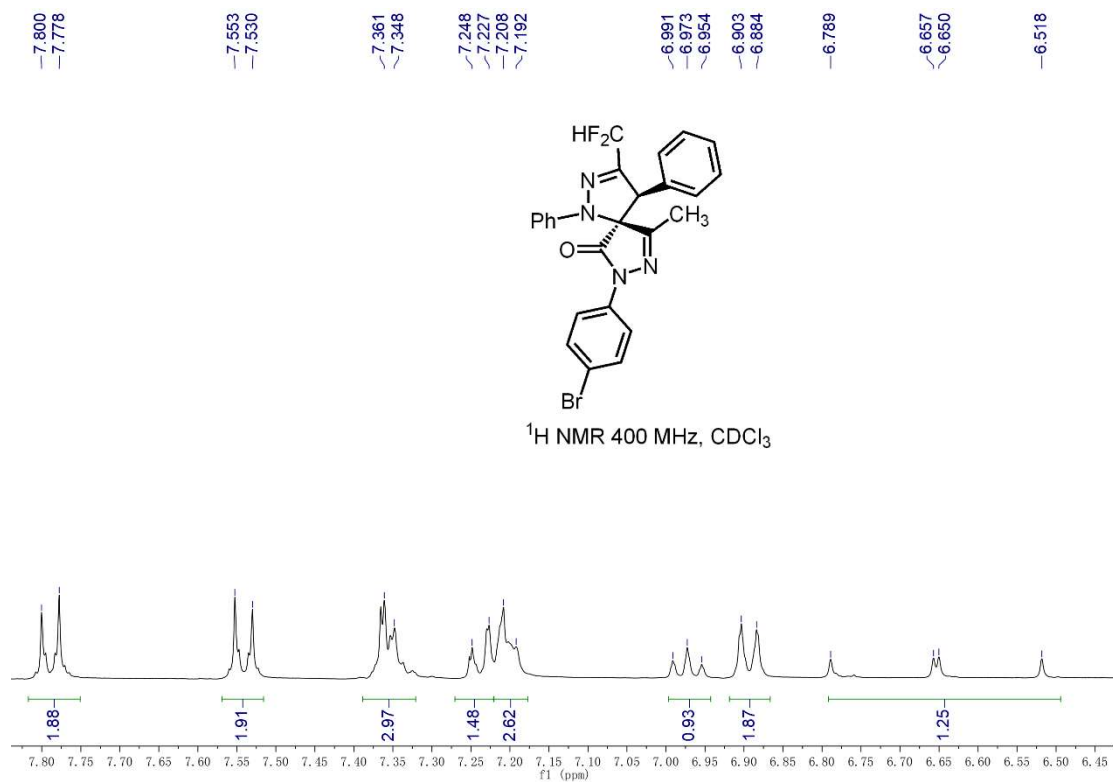

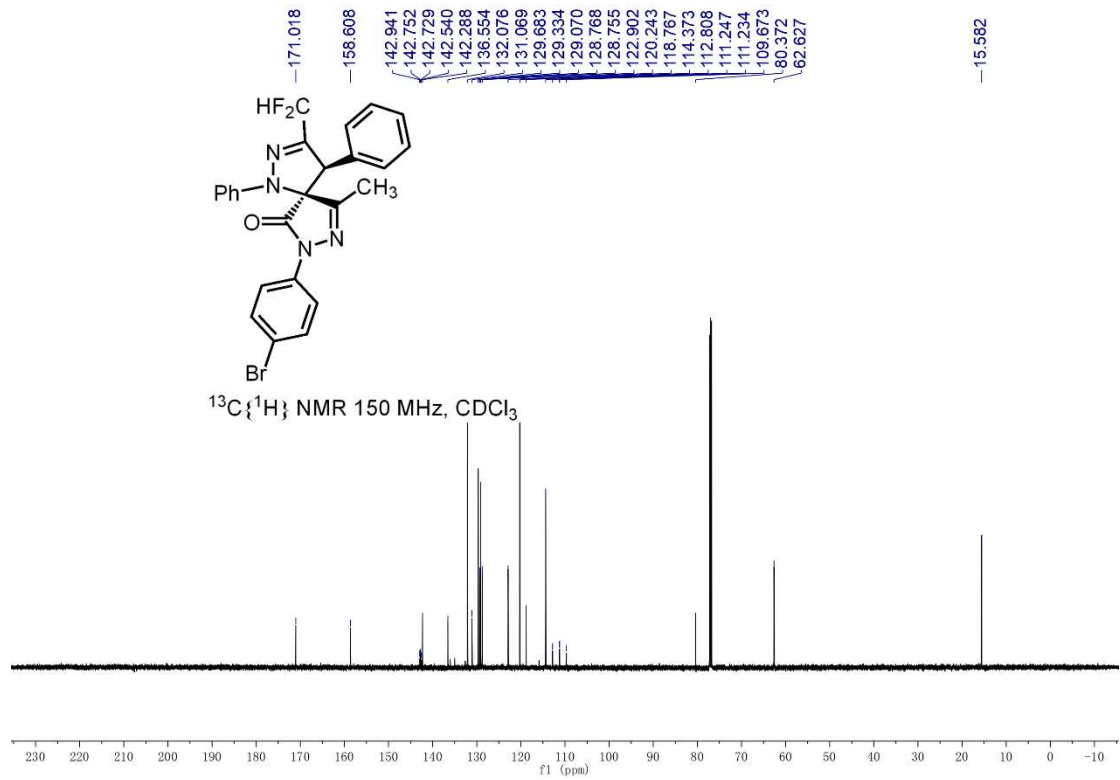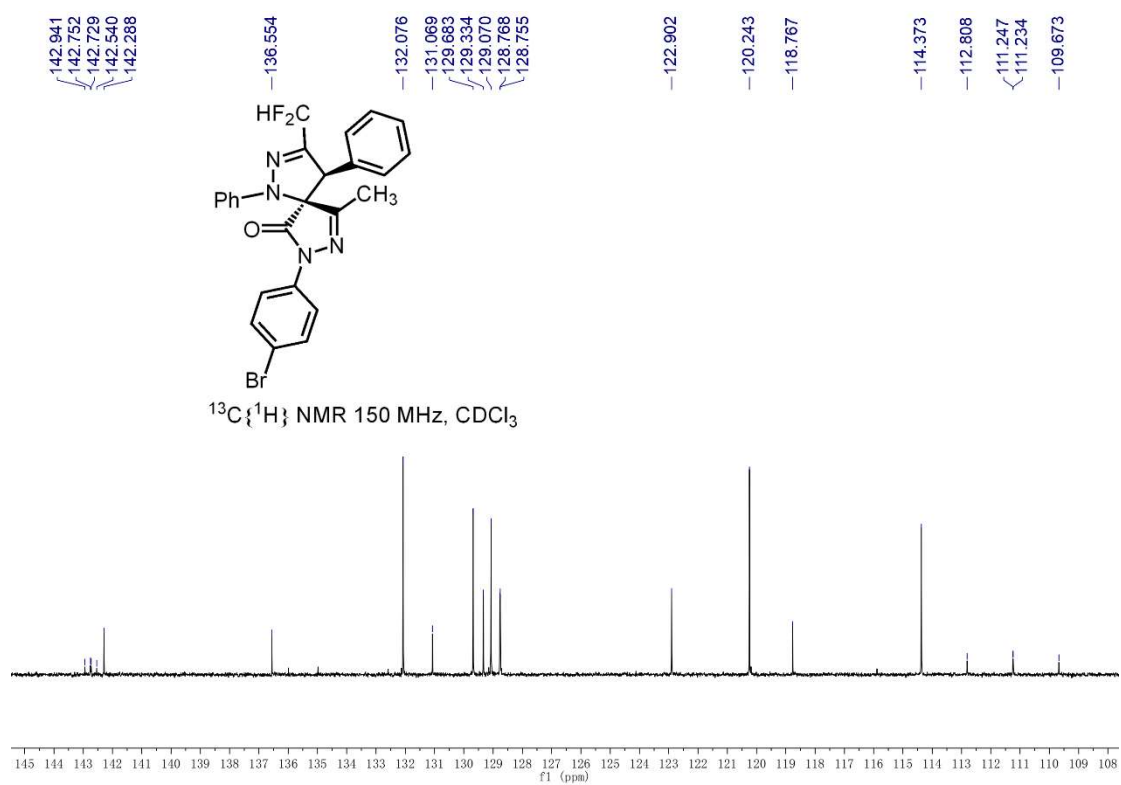

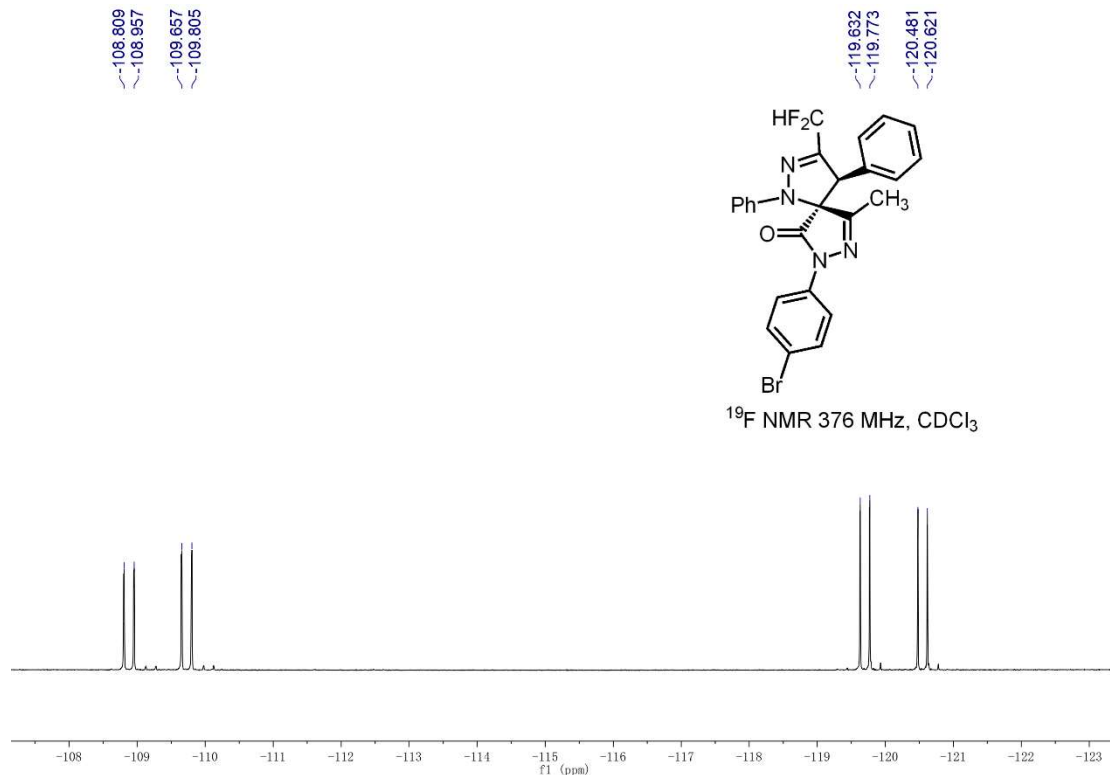

HRMS (ESI) copy of compound (*trans*)-4m:

### Mass Spectrum SmartFormula Report

**Analysis Info**

Analysis Name D:\Data\user\NWNNU-fengyang 20230321-20.d  
 Method tune\_low.m  
 Sample Name A-56  
 Comment

Acquisition Date 2023-3-21 17:24:25  
 Operator BDAL@DE  
 Instrument / Ser# micrOTOF-Q 20453

**Acquisition Parameter**

|             |          |                       |           |                  |           |
|-------------|----------|-----------------------|-----------|------------------|-----------|
| Source Type | ESI      | Ion Polarity          | Positive  | Set Nebulizer    | 0.4 Bar   |
| Focus       | Active   | Set Capillary         | 4500 V    | Set Dry Heater   | 180 j°C   |
| Scan Begin  | 50 m/z   | Set End Plate Offset  | -500 V    | Set Dry Gas      | 4.0 l/min |
| Scan End    | 1000 m/z | Set Collision Cell RF | 400.0 Vpp | Set Divert Valve | Waste     |

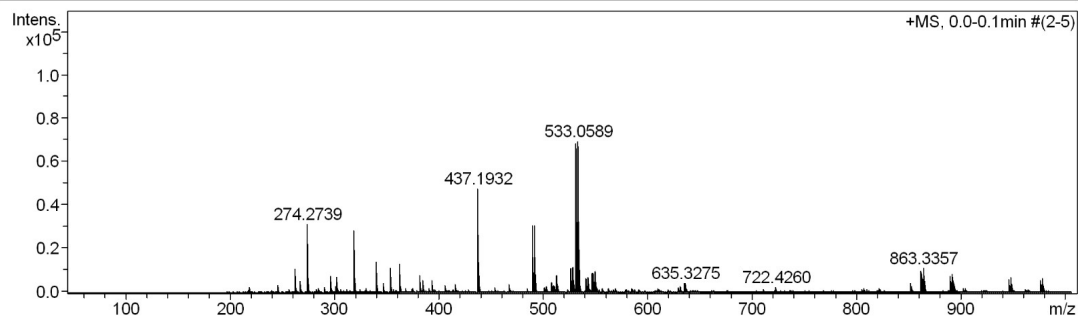

| Meas. #  | Formula                                                               | m/z      | err [ppm] | Me an err [ppm] | rdb  | N-R | ej% Conf | mSi gm a | Std l | St d | St d l | St d | Std Com b Dev |
|----------|-----------------------------------------------------------------------|----------|-----------|-----------------|------|-----|----------|----------|-------|------|--------|------|---------------|
| 531.0599 | 1 C <sub>25</sub> H <sub>19</sub> BrF <sub>2</sub> N <sub>4</sub> NaO | 531.0603 | 0.6       | 0.2             | 16.5 | ok  | even     | 11.7     | 11.7  | 0.8  | 4.3    | 1.3  | 842.7         |

NMR copies of compound (*cis*)-4m:

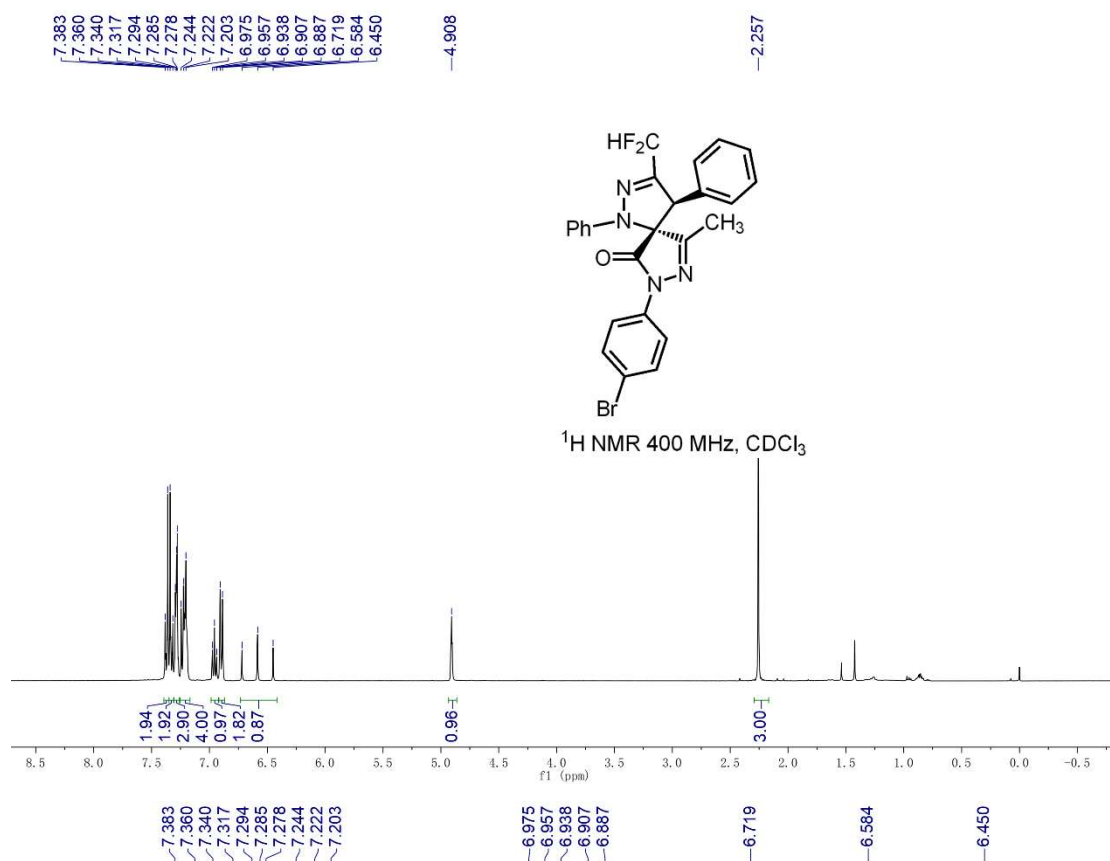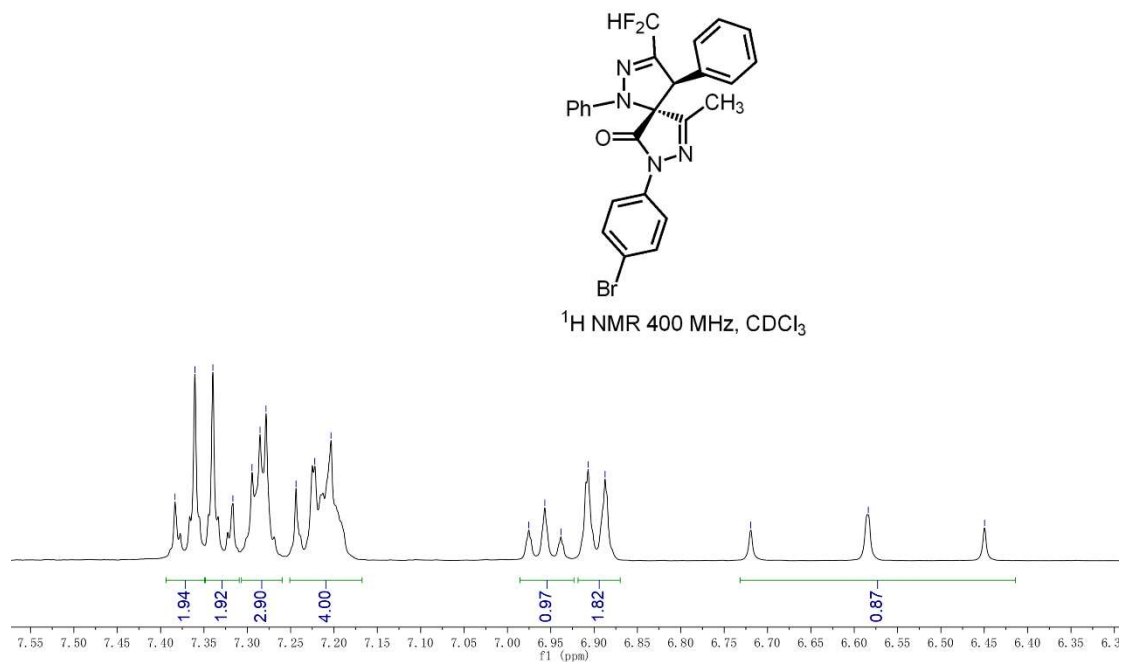



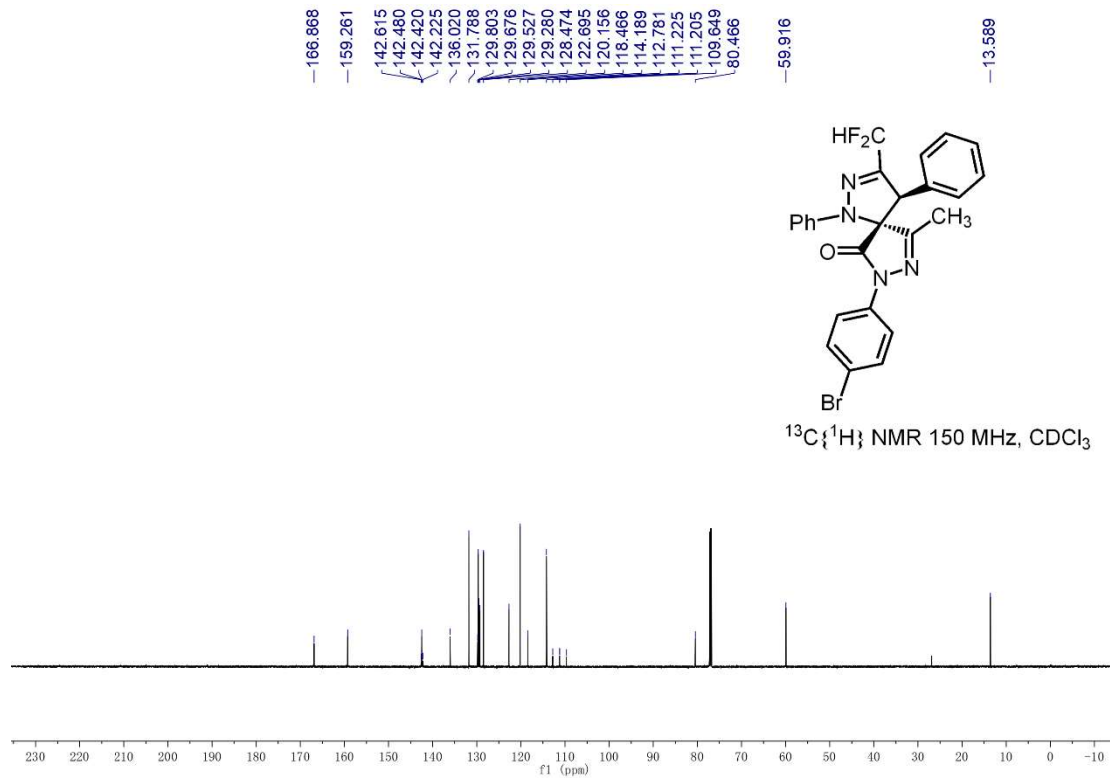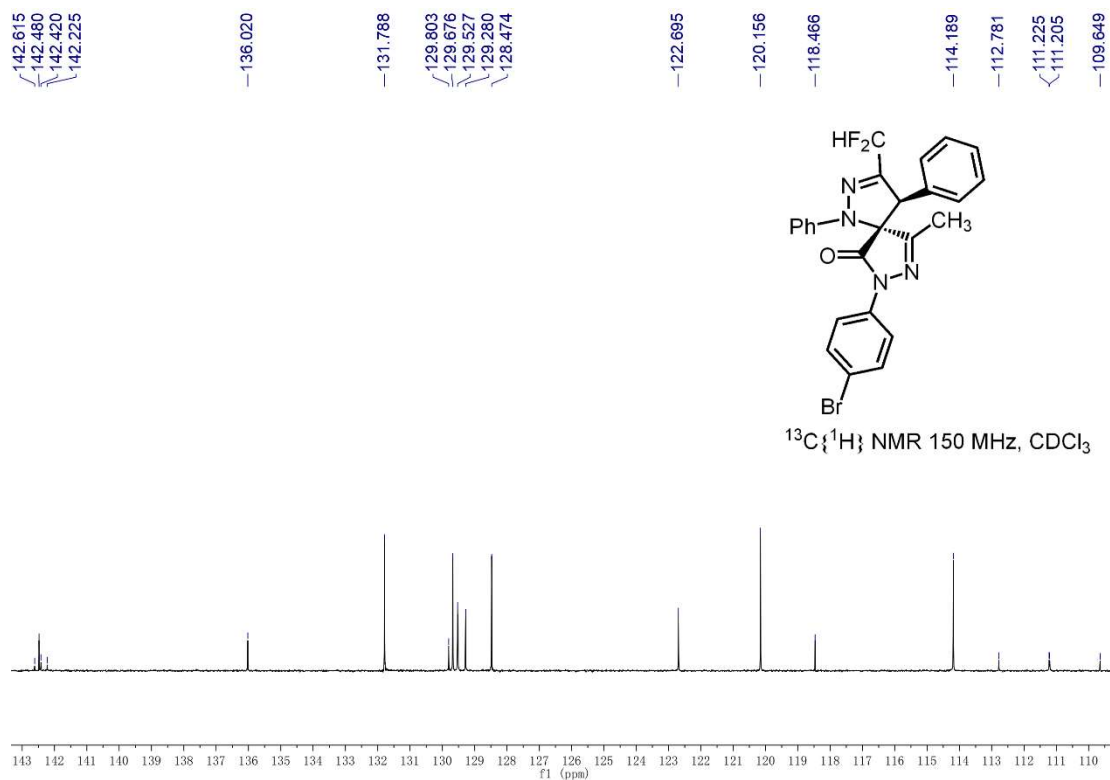

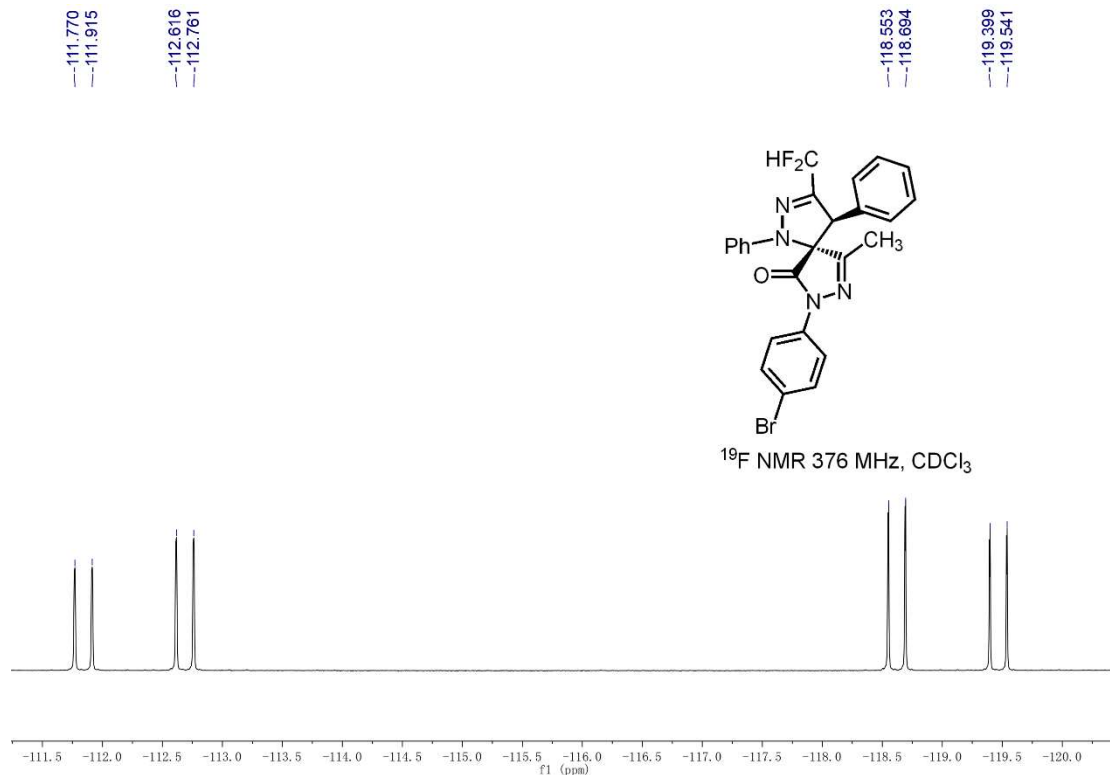

HRMS (ESI) copy of compound (*cis*)-4m:

### Mass Spectrum SmartFormula Report

#### Analysis Info

Analysis Name D:\Data\user\NWNNU-fengyang 20230321-21.d  
 Method tune\_low.m  
 Sample Name A-561  
 Comment

Acquisition Date 2023-3-21 17:26:16

Operator BDAL@DE  
 Instrument / Ser# micrOTOF-Q 20453

#### Acquisition Parameter

|             |          |                       |           |                  |           |
|-------------|----------|-----------------------|-----------|------------------|-----------|
| Source Type | ESI      | Ion Polarity          | Positive  | Set Nebulizer    | 0.4 Bar   |
| Focus       | Active   | Set Capillary         | 4500 V    | Set Dry Heater   | 180 j°C   |
| Scan Begin  | 50 m/z   | Set End Plate Offset  | -500 V    | Set Dry Gas      | 4.0 l/min |
| Scan End    | 1000 m/z | Set Collision Cell RF | 400.0 Vpp | Set Divert Valve | Waste     |

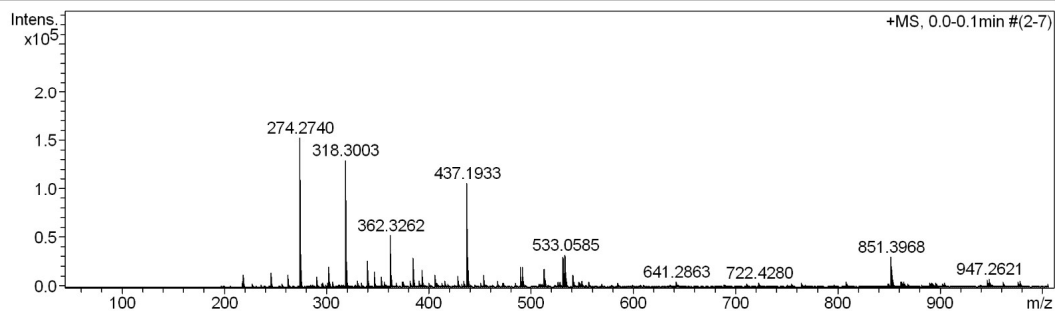

| Meas. #  | Formula                     | m/z      | err [p] | Me an [p] | rdb  | N-R | ej%  | mSi gm | Std l | St d | Std l | St d | Std Com b |
|----------|-----------------------------|----------|---------|-----------|------|-----|------|--------|-------|------|-------|------|-----------|
| 531.0601 | 1 C 25 H 19 Br F 2 N 4 Na O | 531.0603 | 0.3     | 0.4       | 16.5 | ok  | even | 28.9   | 23.8  | 0.6  | 11.9  | 0.9  | 842.7     |

NMR copies of compound (*trans*)-4n:

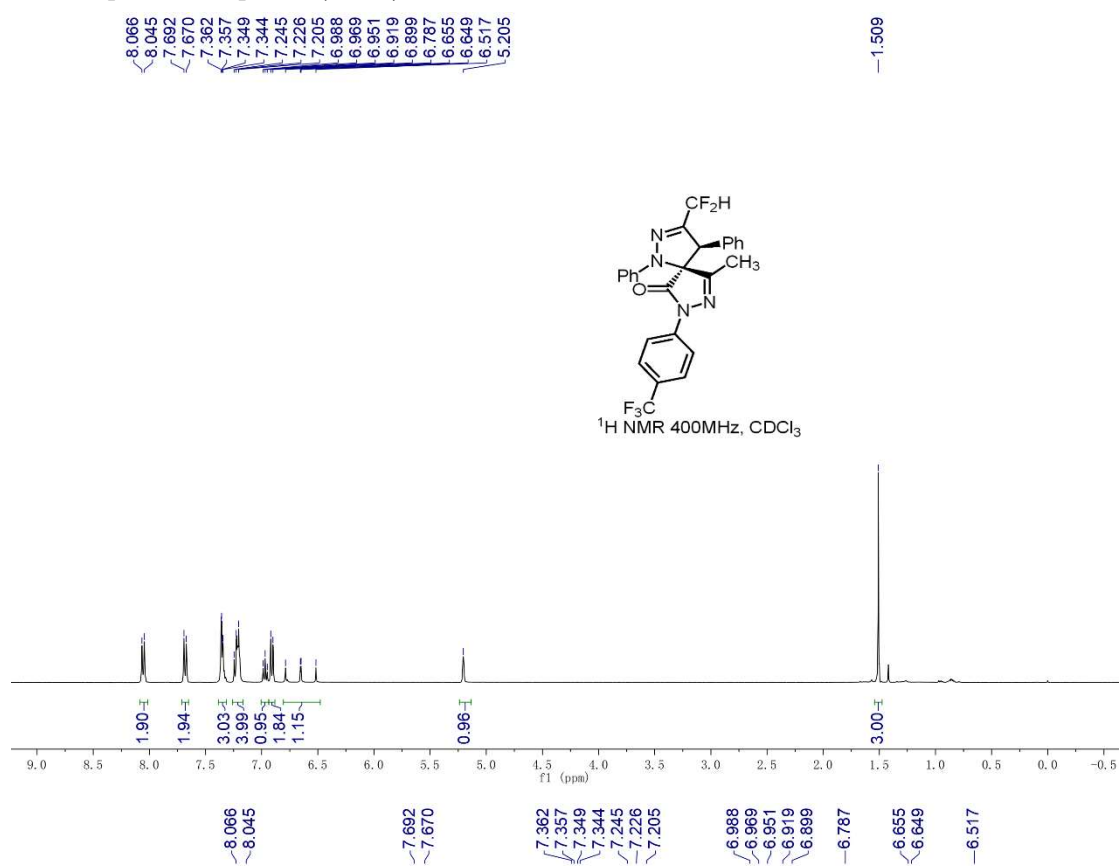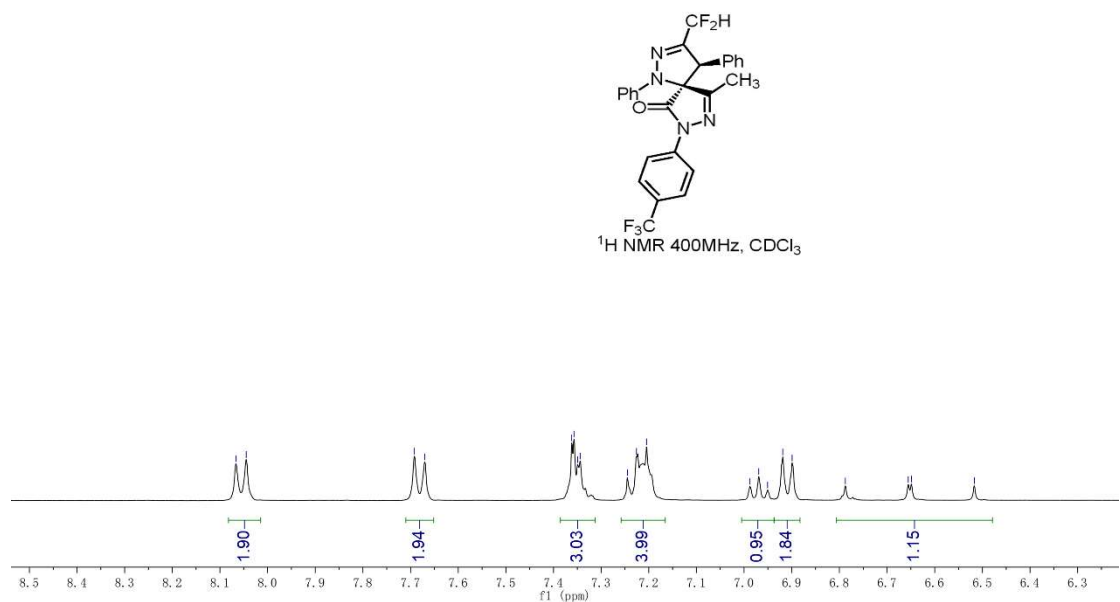

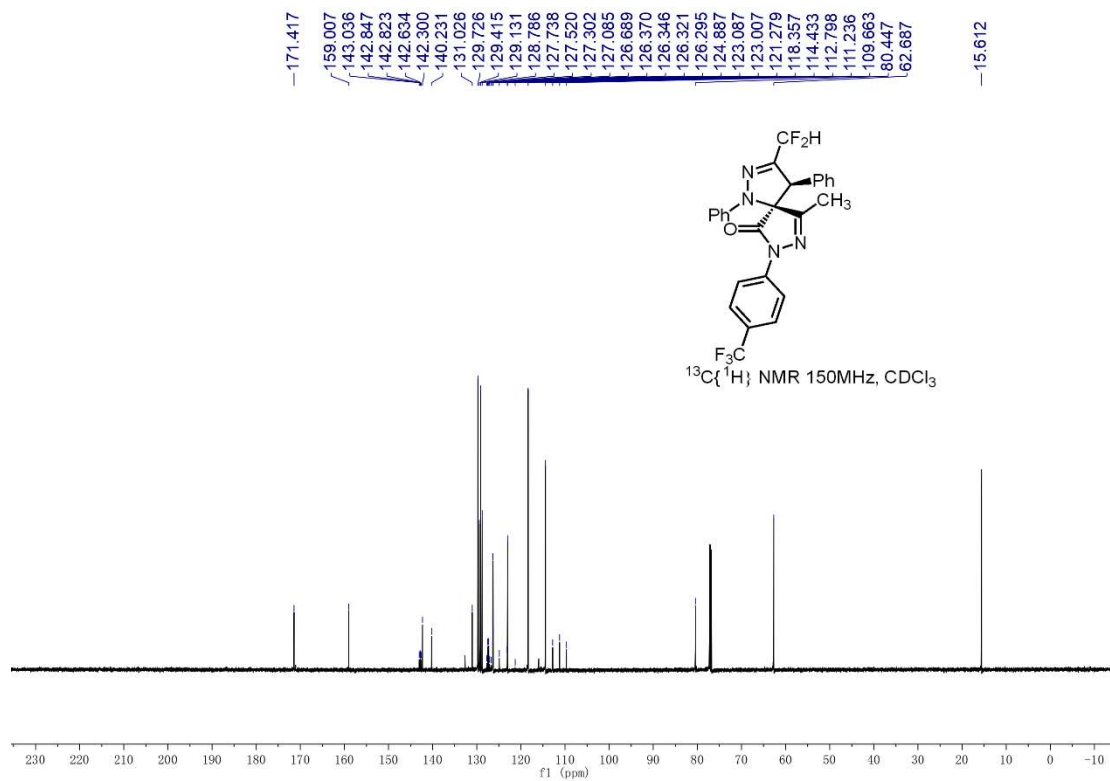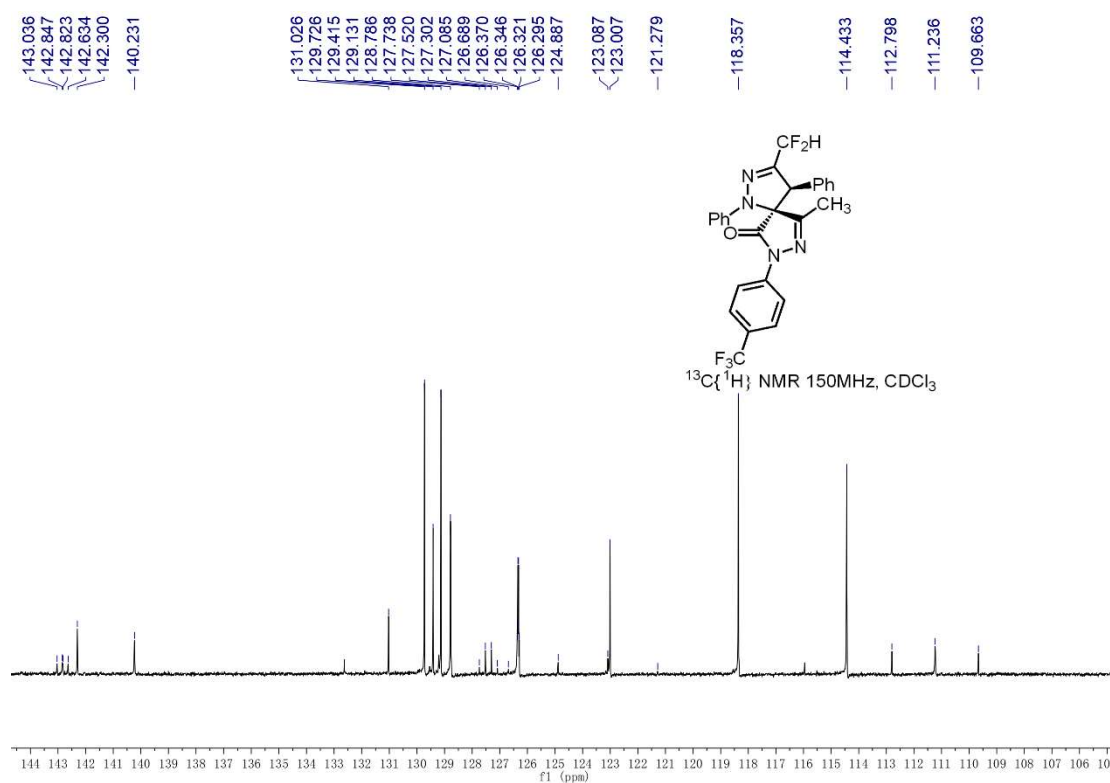

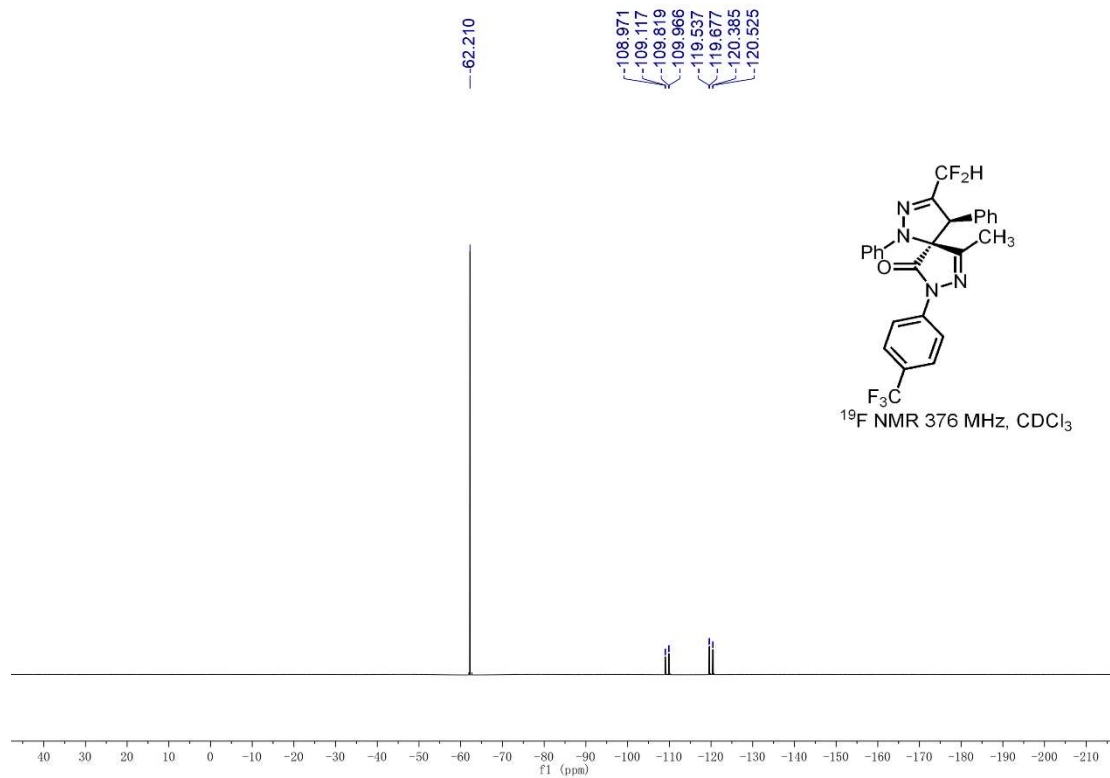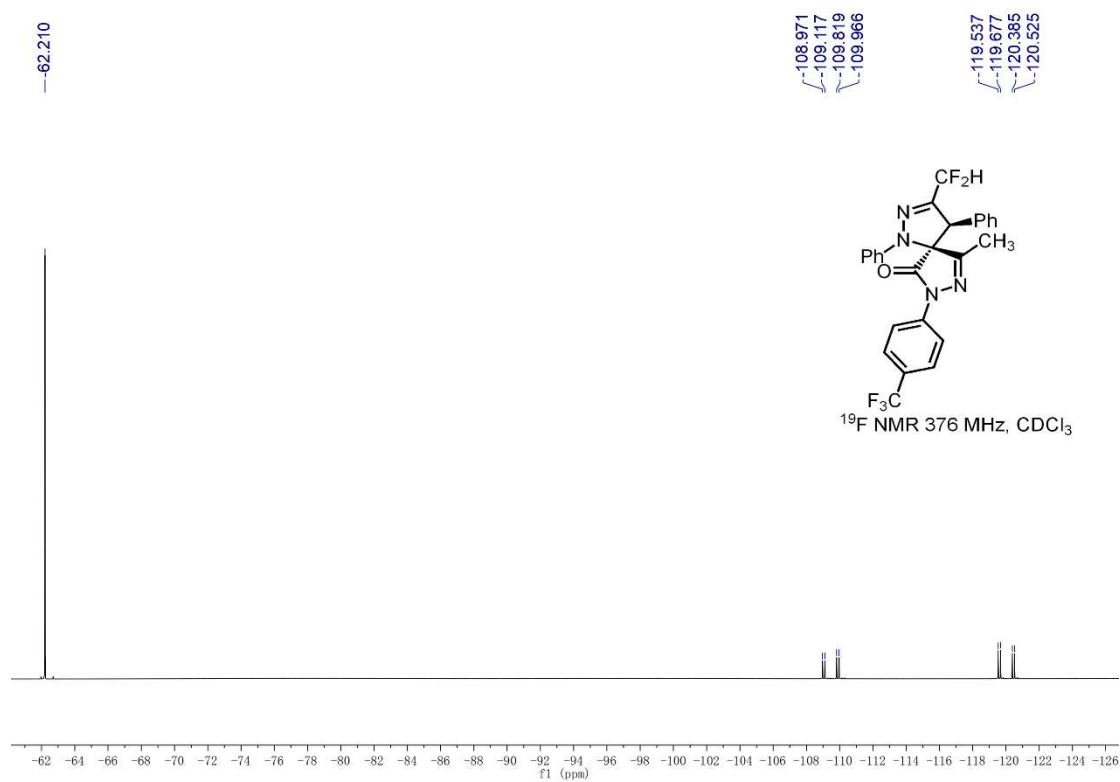

# HRMS (ESI) copy of compound (*trans*)-4n:

FENGYANG-A60#25-85 RT: 0.11-0.38 AV: 61 NL: 4.27E7  
 T: FTMS + p ESI Full lock ms [50.0000-750.0000]

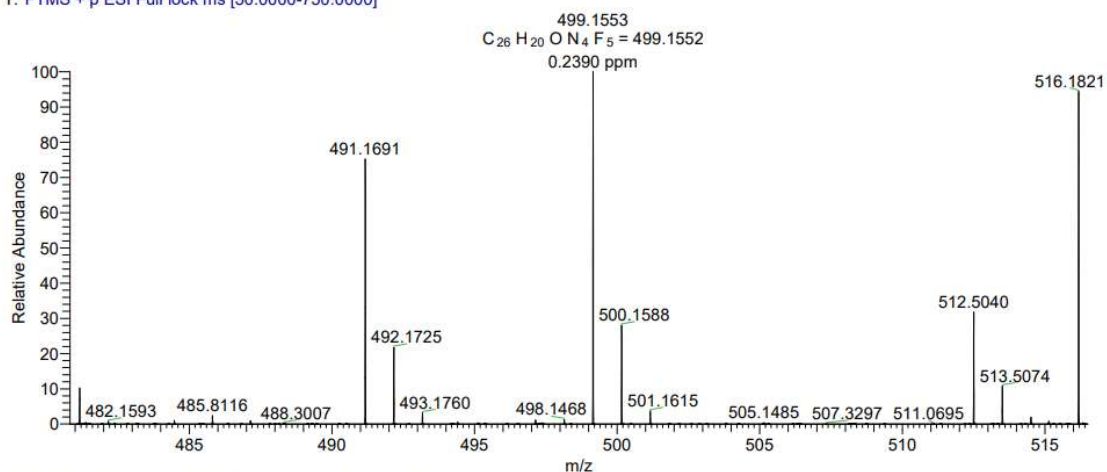

FENGYANG-A60#25-85 RT: 0.11-0.38 AV: 61  
 T: FTMS + p ESI Full lock ms [50.0000-750.0000]  
 m/z = 480.8124-516.5004

| m/z      | Intensity  | Relative | Theo. Mass | Delta (ppm) | Composition                                                     |
|----------|------------|----------|------------|-------------|-----------------------------------------------------------------|
| 491.1691 | 32232198.0 | 75.39    |            |             |                                                                 |
| 499.1553 | 42752016.0 | 100.00   | 499.1552   | 0.12        | C <sub>26</sub> H <sub>20</sub> O N <sub>4</sub> F <sub>5</sub> |
| 512.5040 | 13690603.0 | 32.02    |            |             |                                                                 |
| 516.1821 | 40365292.0 | 94.42    |            |             |                                                                 |

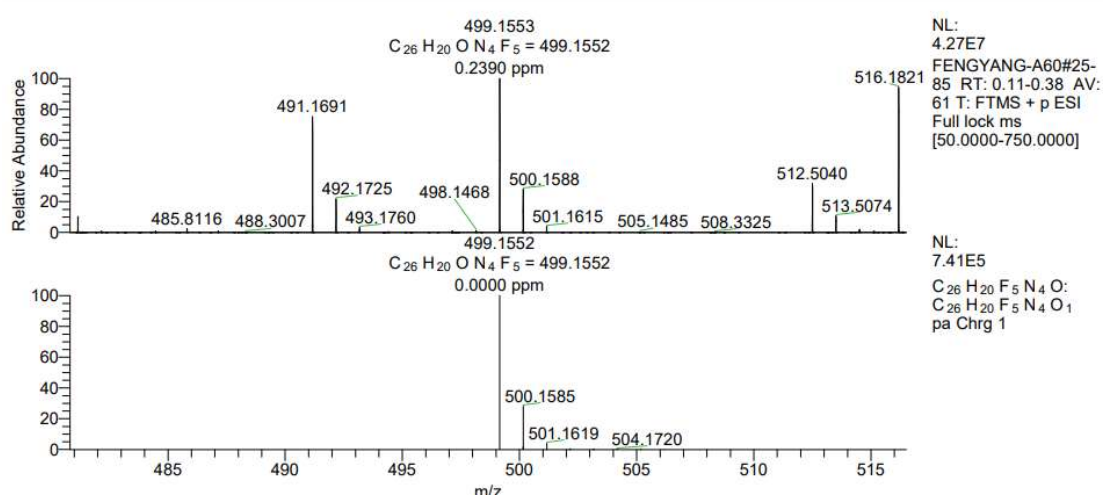

NL:  
 4.27E7  
 FENGYANG-A60#25-  
 85 RT: 0.11-0.38 AV:  
 61 T: FTMS + p ESI  
 Full lock ms  
 [50.0000-750.0000]

NL:  
 7.41E5  
 C<sub>26</sub>H<sub>20</sub>F<sub>5</sub>N<sub>4</sub>O:  
 C<sub>26</sub>H<sub>20</sub>F<sub>5</sub>N<sub>4</sub>O<sub>1</sub>  
 pa Chrg 1

NMR copies of compound **4n**:

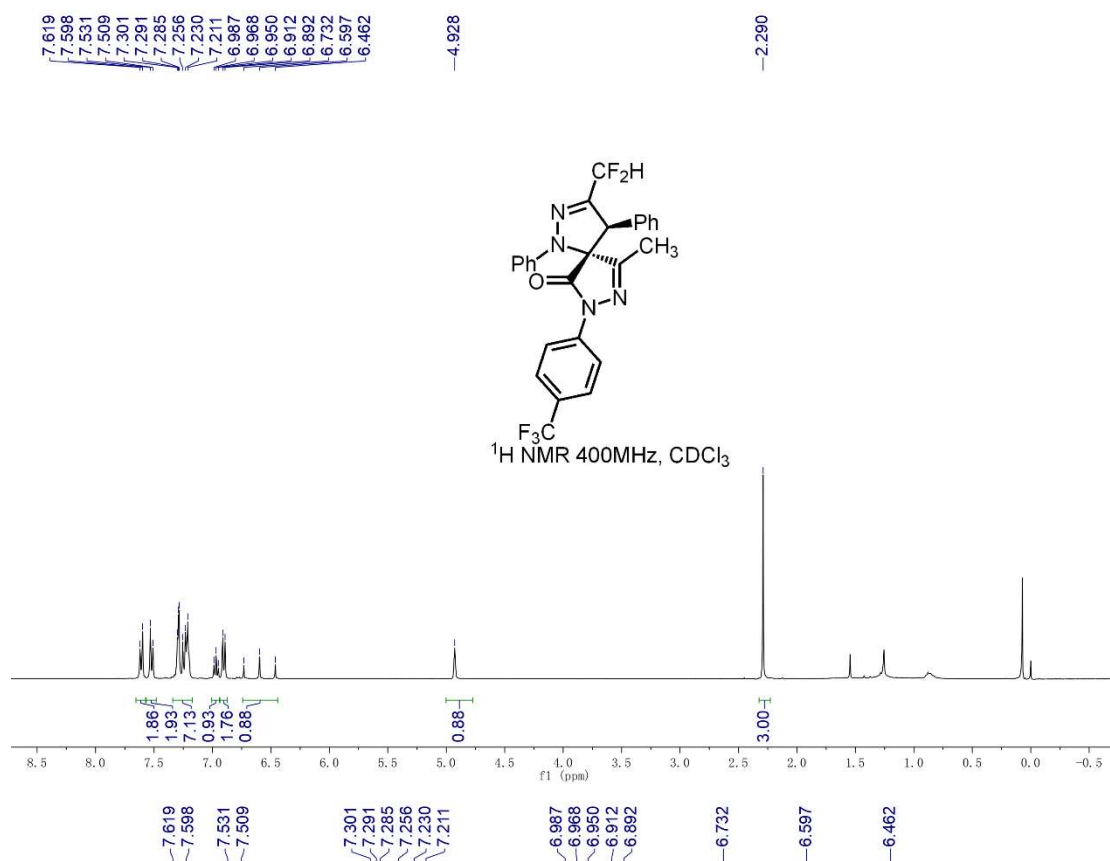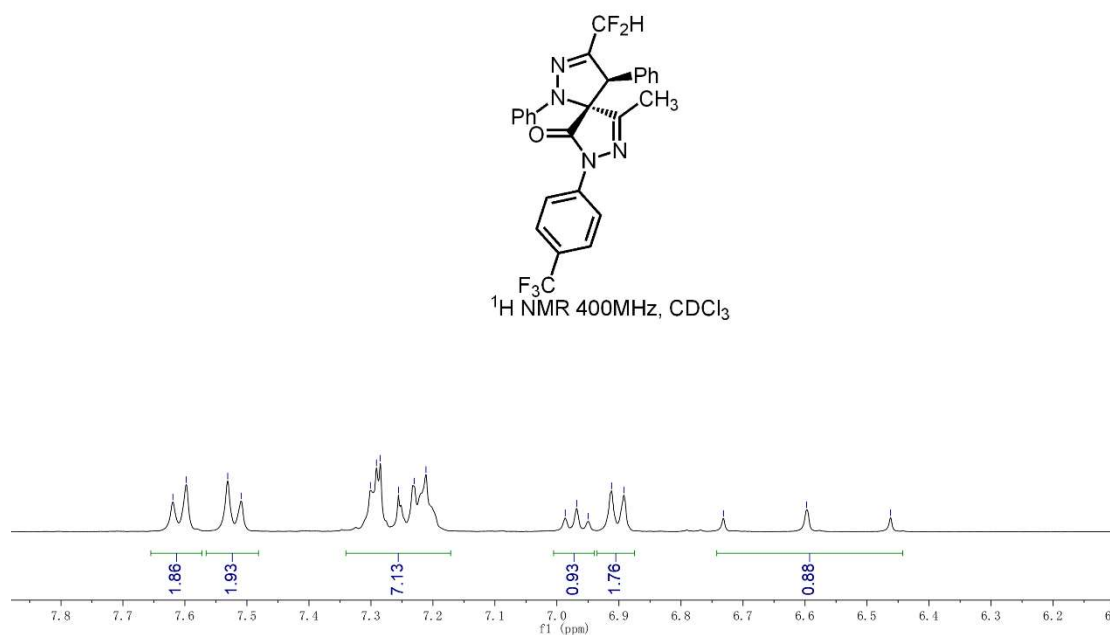

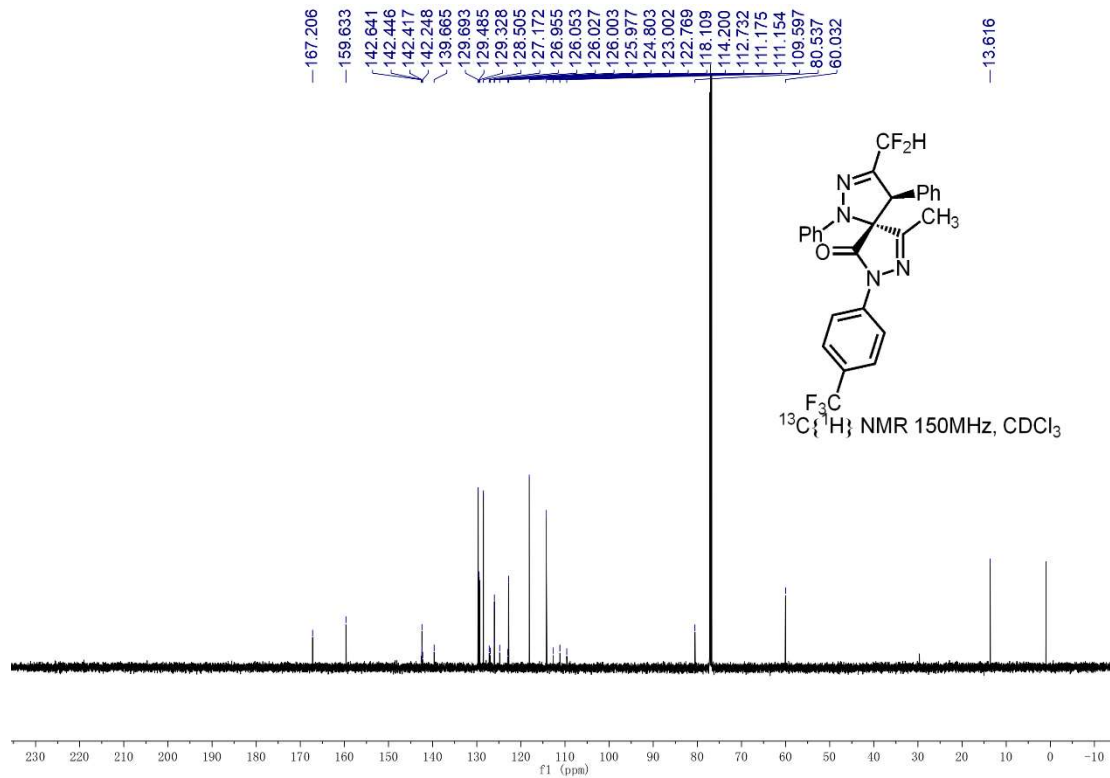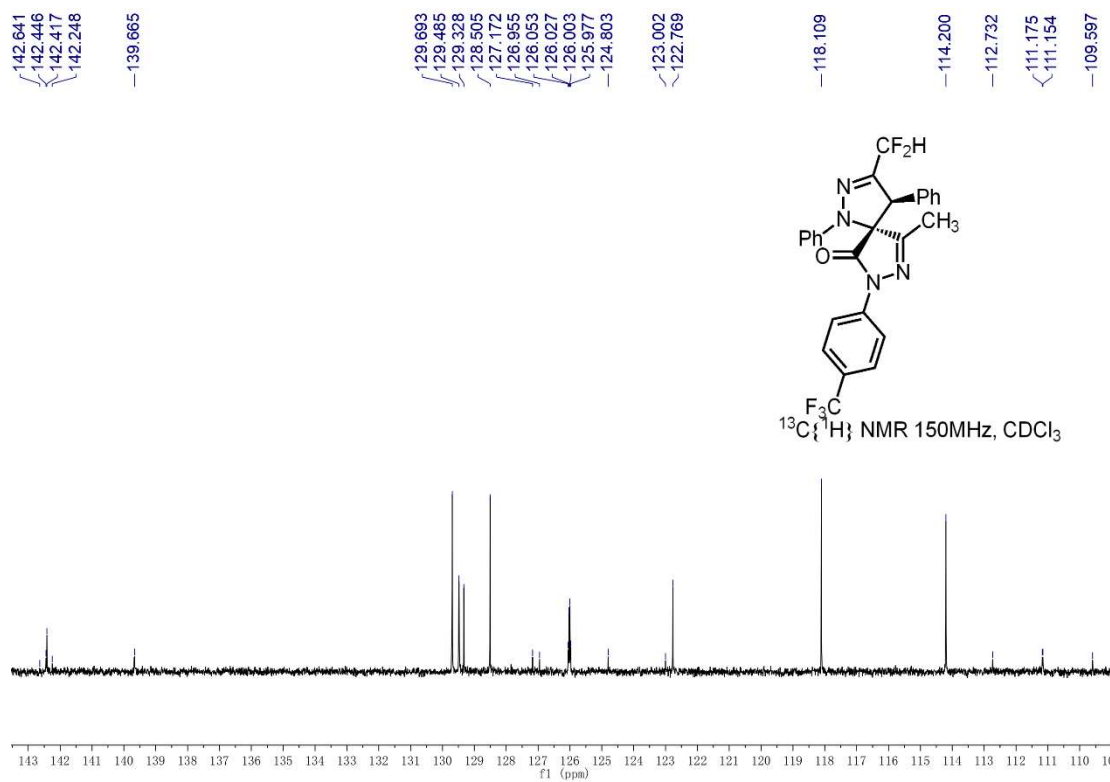



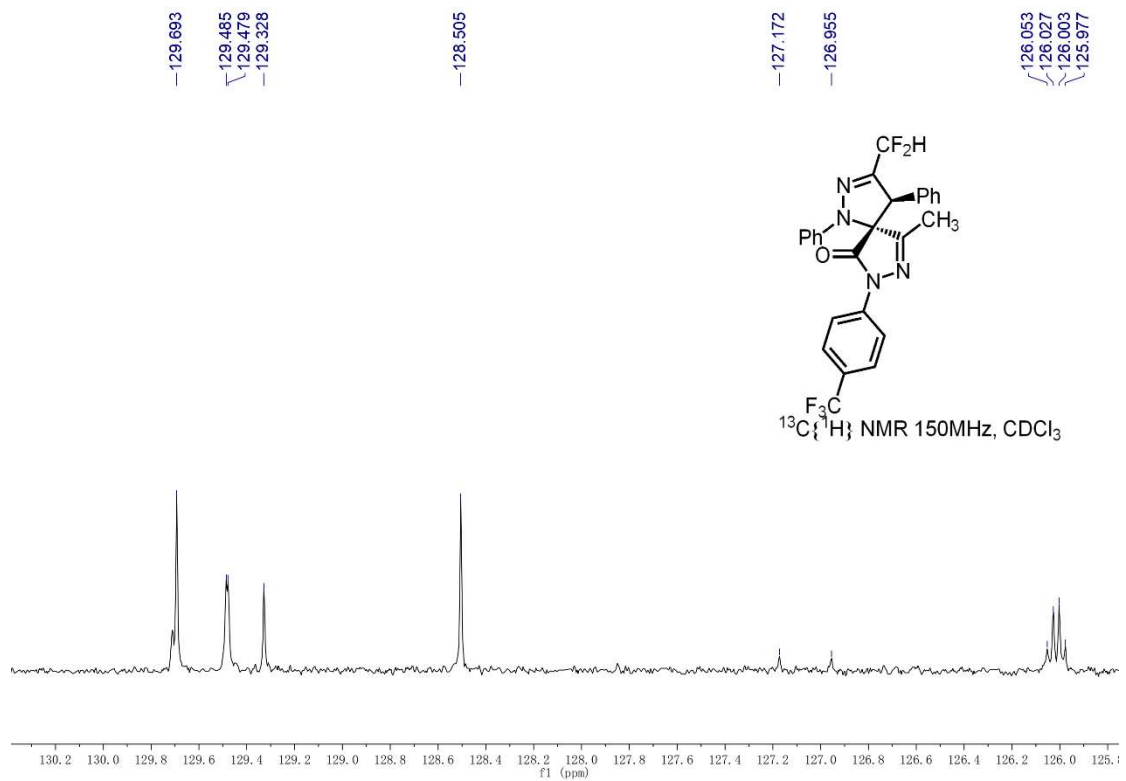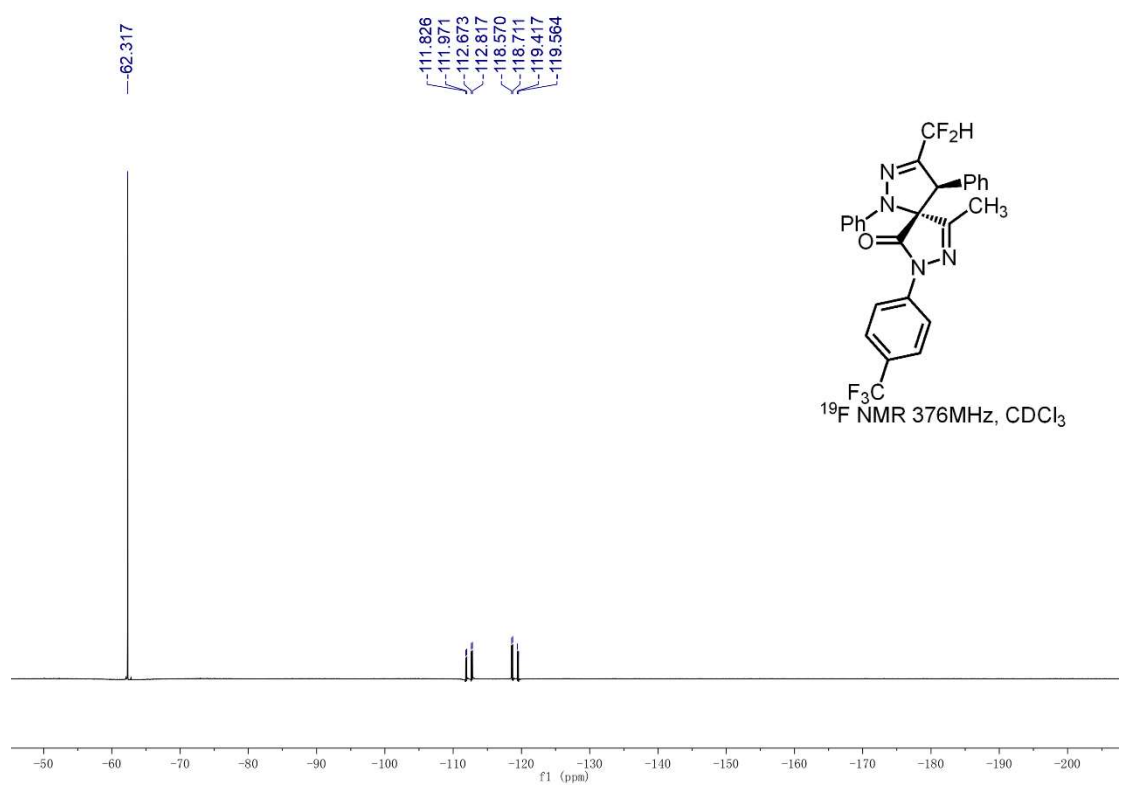

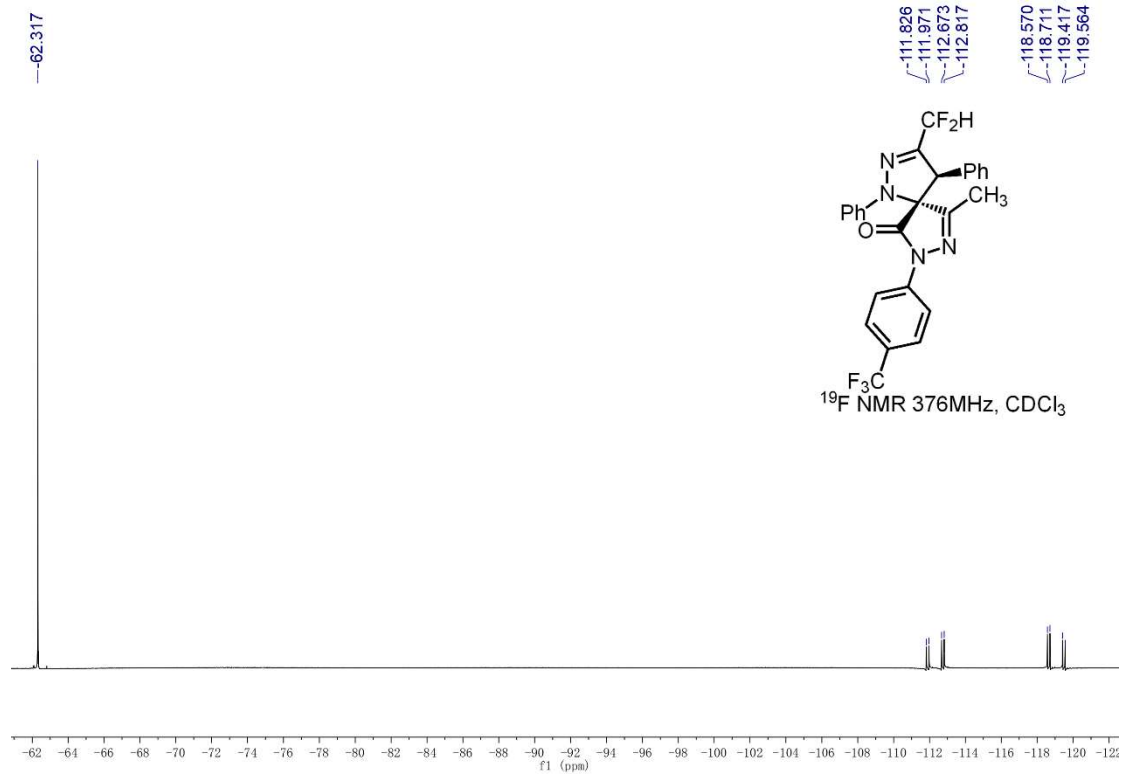

# HRMS (ESI) copy of compound (*cis*)-4n:

FENGYANG-A601#27-68 RT: 0.12-0.30 AV: 42 NL: 3.74E7  
 T: FTMS + p ESI Full lock ms [50.0000-750.0000]

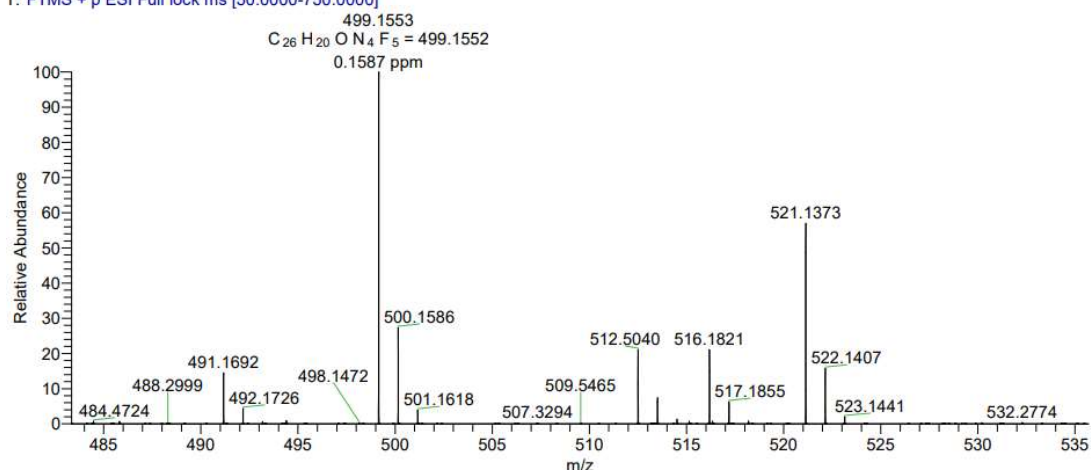

FENGYANG-A601#27-68 RT: 0.12-0.30 AV: 42  
 T: FTMS + p ESI Full lock ms [50.0000-750.0000]  
 m/z = 483.3411-535.6811

| m/z      | Intensity  | Relative | Theo. Mass | Delta (ppm) | Composition                                                     |
|----------|------------|----------|------------|-------------|-----------------------------------------------------------------|
| 499.1553 | 38434080.0 | 100.00   | 499.1552   | 0.08        | C <sub>26</sub> H <sub>20</sub> O N <sub>4</sub> F <sub>5</sub> |
| 500.1586 | 10593993.0 | 27.56    |            |             |                                                                 |
| 516.1821 | 8098729.0  | 21.07    |            |             |                                                                 |
| 521.1373 | 21384144.0 | 55.64    |            |             |                                                                 |

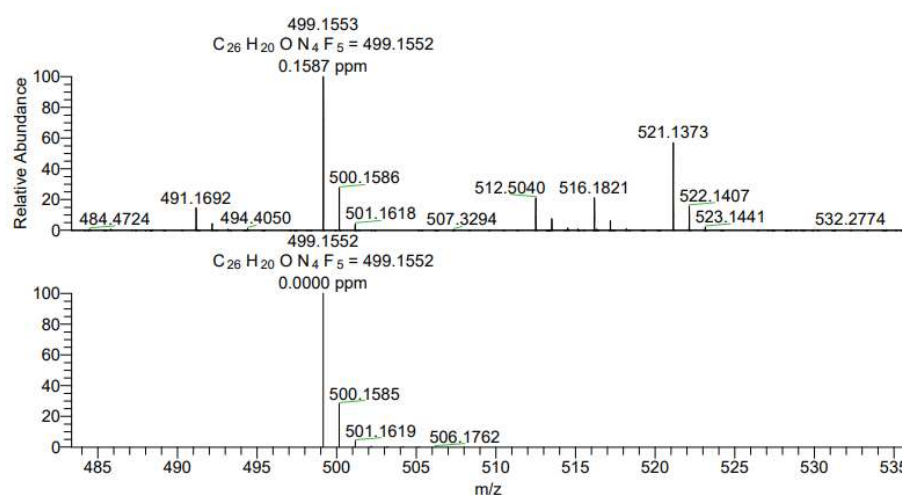

NL:  
 3.74E7  
 FENGYANG-A601#27-68 RT: 0.12-0.30 AV: 42 T: FTMS + p ESI Full lock ms [50.0000-750.0000]

NL:  
 7.41E5  
 C<sub>26</sub>H<sub>20</sub>F<sub>5</sub>N<sub>4</sub>O:  
 C<sub>26</sub>H<sub>20</sub>F<sub>5</sub>N<sub>4</sub>O<sub>1</sub>  
 pa Chrg 1

NMR copies of compound (*trans*)-4o:

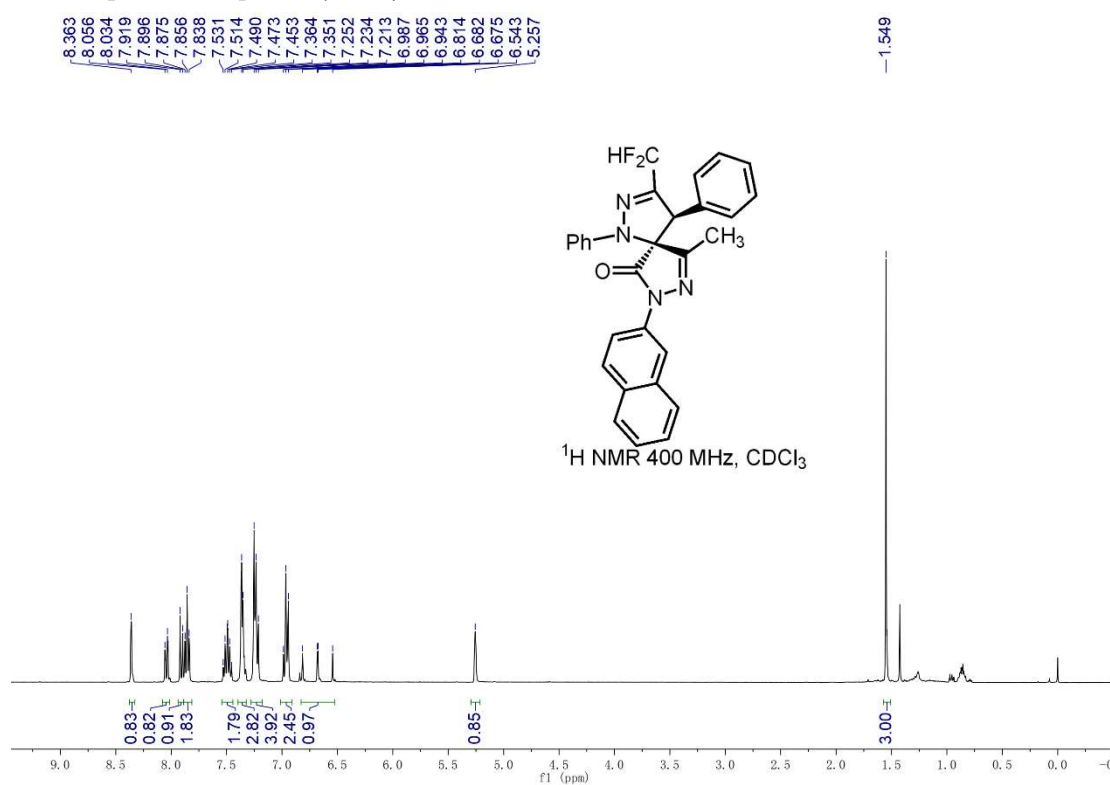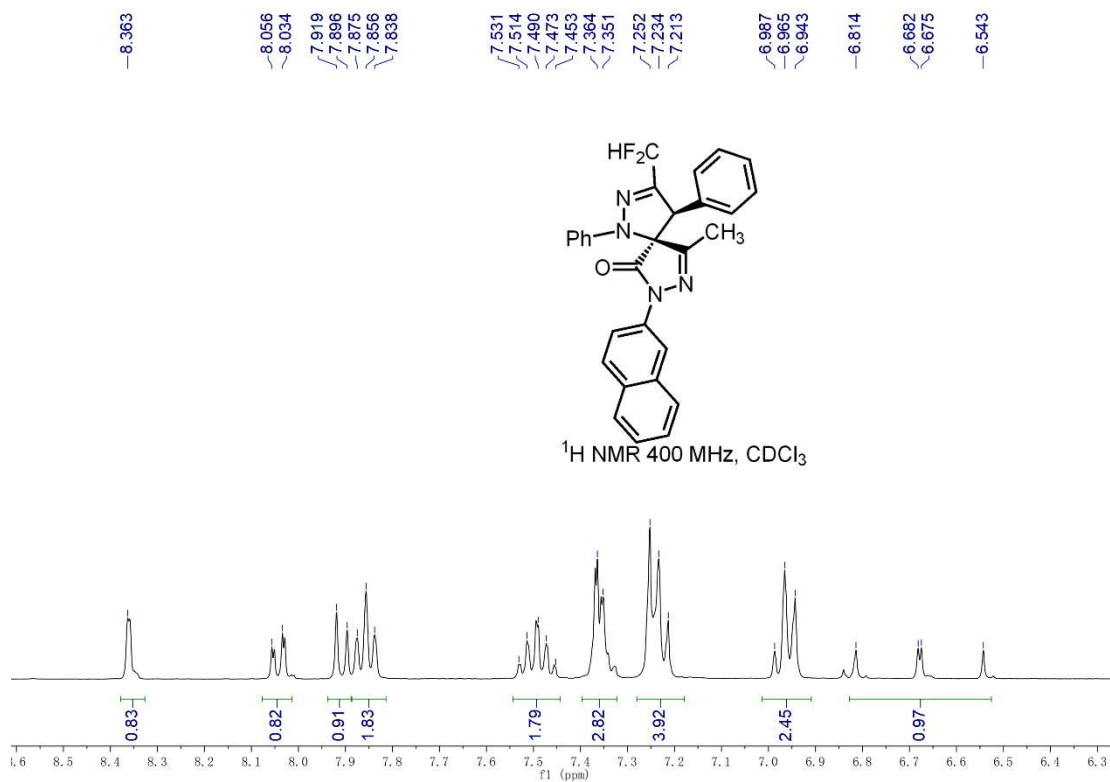

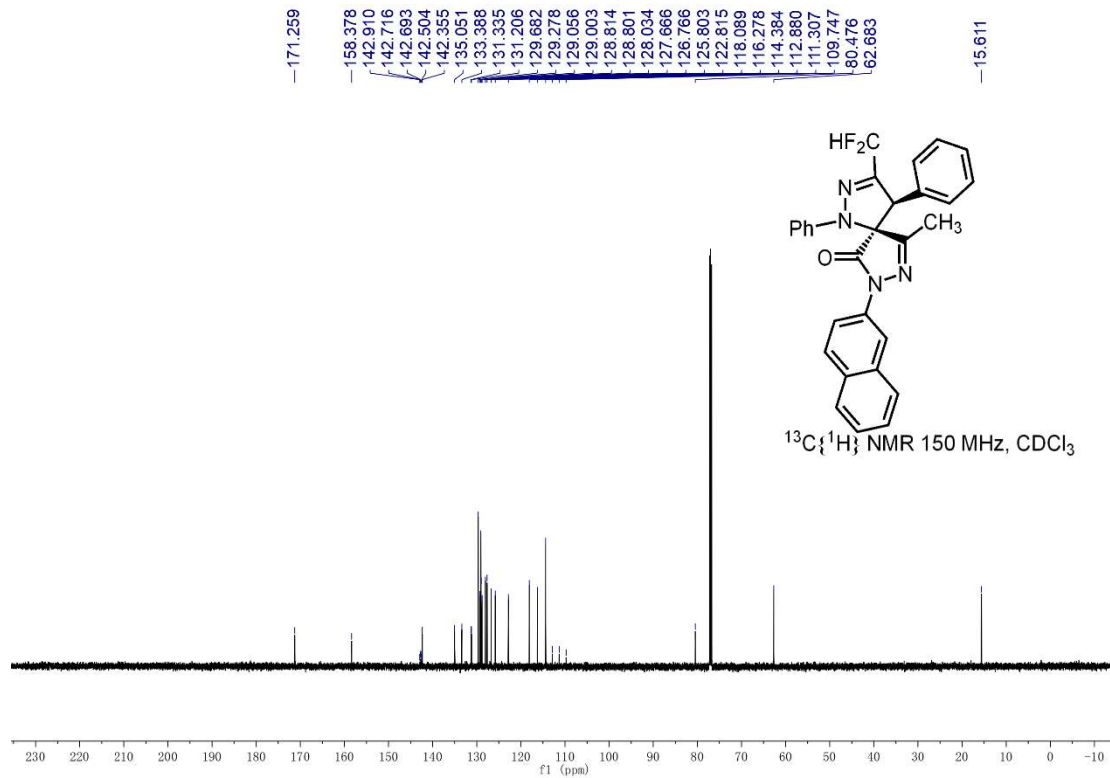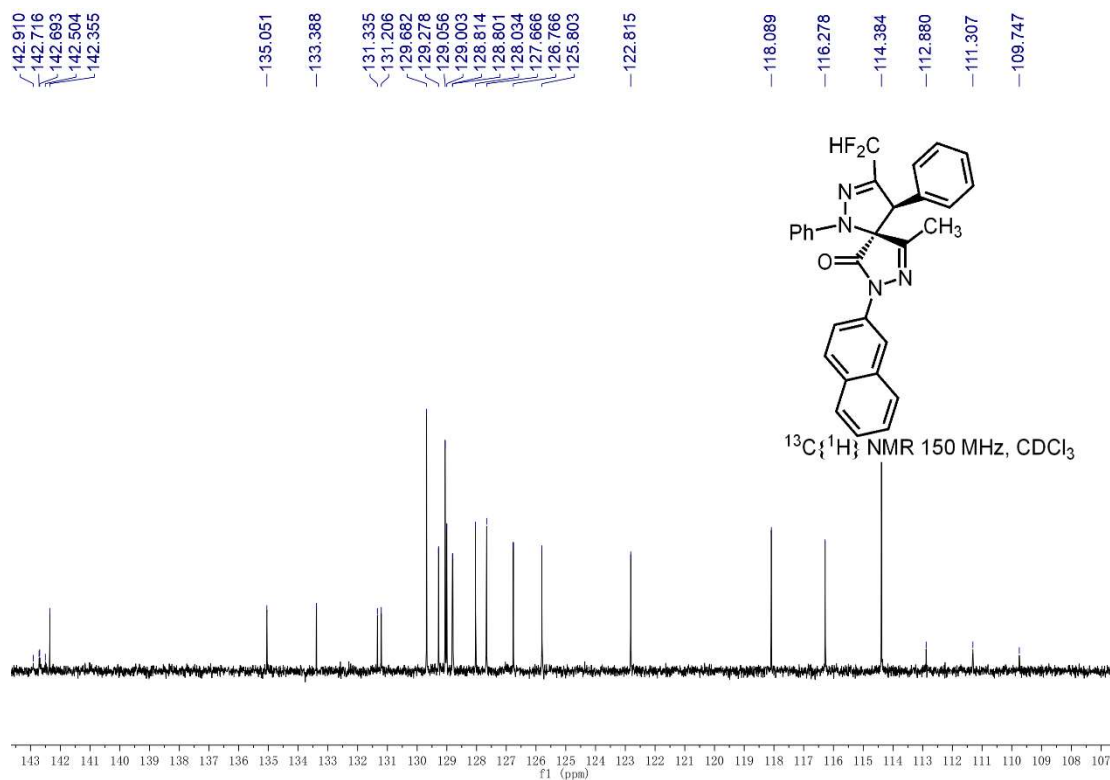

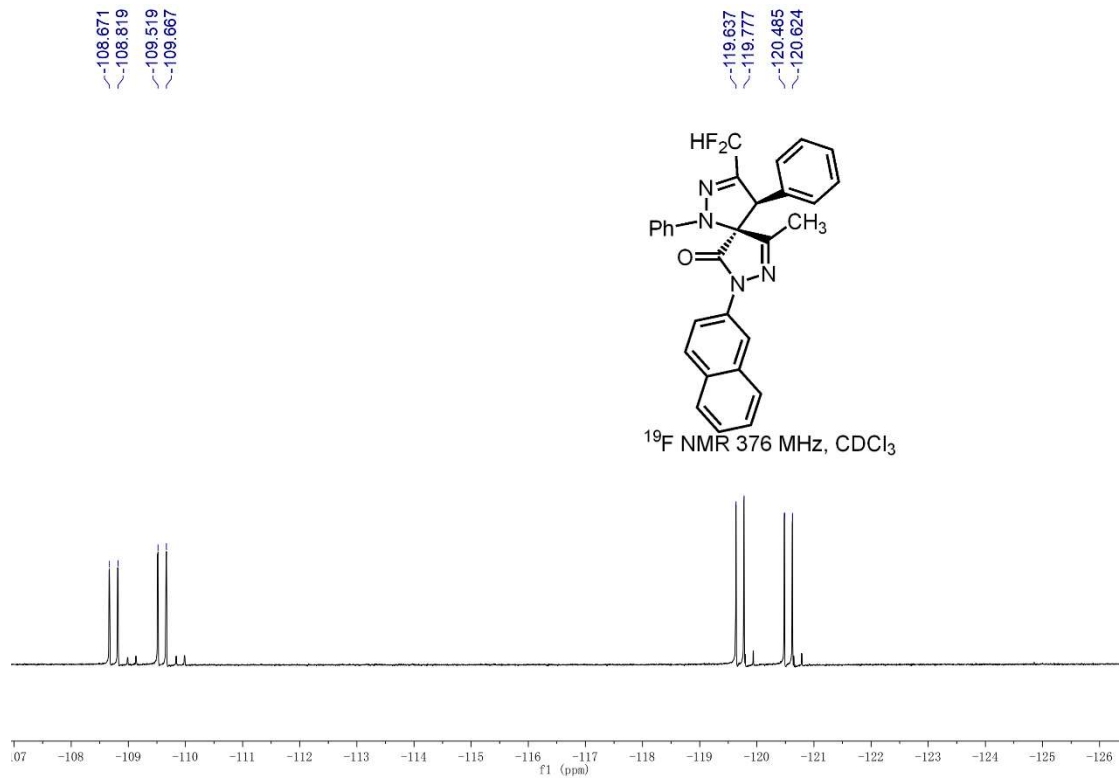

HRMS (ESI) copy of compound (*trans*)-4o:

### Mass Spectrum SmartFormula Report

#### Analysis Info

Analysis Name D:\Data\user\NWN\U-fengyang 20230321-22.d  
Method tune\_low.m  
Sample Name A-58  
Comment

Acquisition Date 2023-3-21 17:29:38

Operator BDAL@DE  
Instrument / Ser# micrOTOF-Q 20453

#### Acquisition Parameter

|             |          |                       |           |                  |           |
|-------------|----------|-----------------------|-----------|------------------|-----------|
| Source Type | ESI      | Ion Polarity          | Positive  | Set Nebulizer    | 0.4 Bar   |
| Focus       | Active   | Set Capillary         | 4500 V    | Set Dry Heater   | 180 j̄aC  |
| Scan Begin  | 50 m/z   | Set End Plate Offset  | -500 V    | Set Dry Gas      | 4.0 l/min |
| Scan End    | 1000 m/z | Set Collision Cell RF | 400.0 Vpp | Set Divert Valve | Waste     |

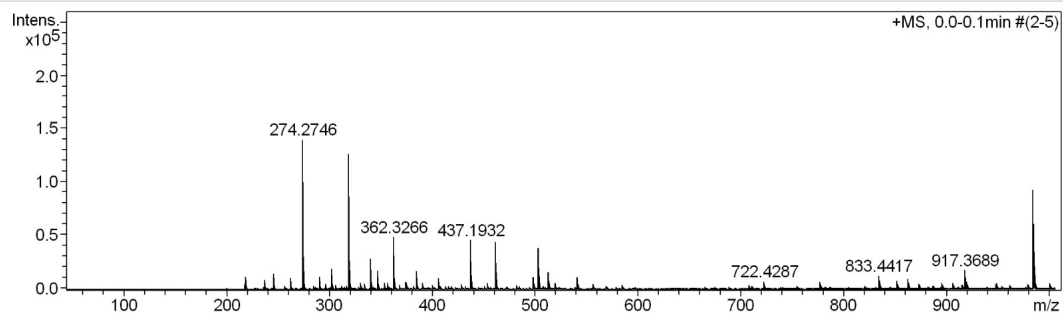

| Meas. m/z | # | Formula                                                           | m/z      | err [ppm] | Me an err [ppm] | rdb  | N-R | e j % Conf | mS  | Std | Std | Std | Std | Std   |
|-----------|---|-------------------------------------------------------------------|----------|-----------|-----------------|------|-----|------------|-----|-----|-----|-----|-----|-------|
| 503.1665  | 1 | C <sub>29</sub> H <sub>22</sub> F <sub>2</sub> N <sub>4</sub> NaO | 503.1654 | -2.3      | -1.3            | 19.5 | ok  | even       | 5.7 | 8.7 | 1.0 | 3.6 | 1.9 | 842.7 |

NMR copies of compound (*cis*)-40:

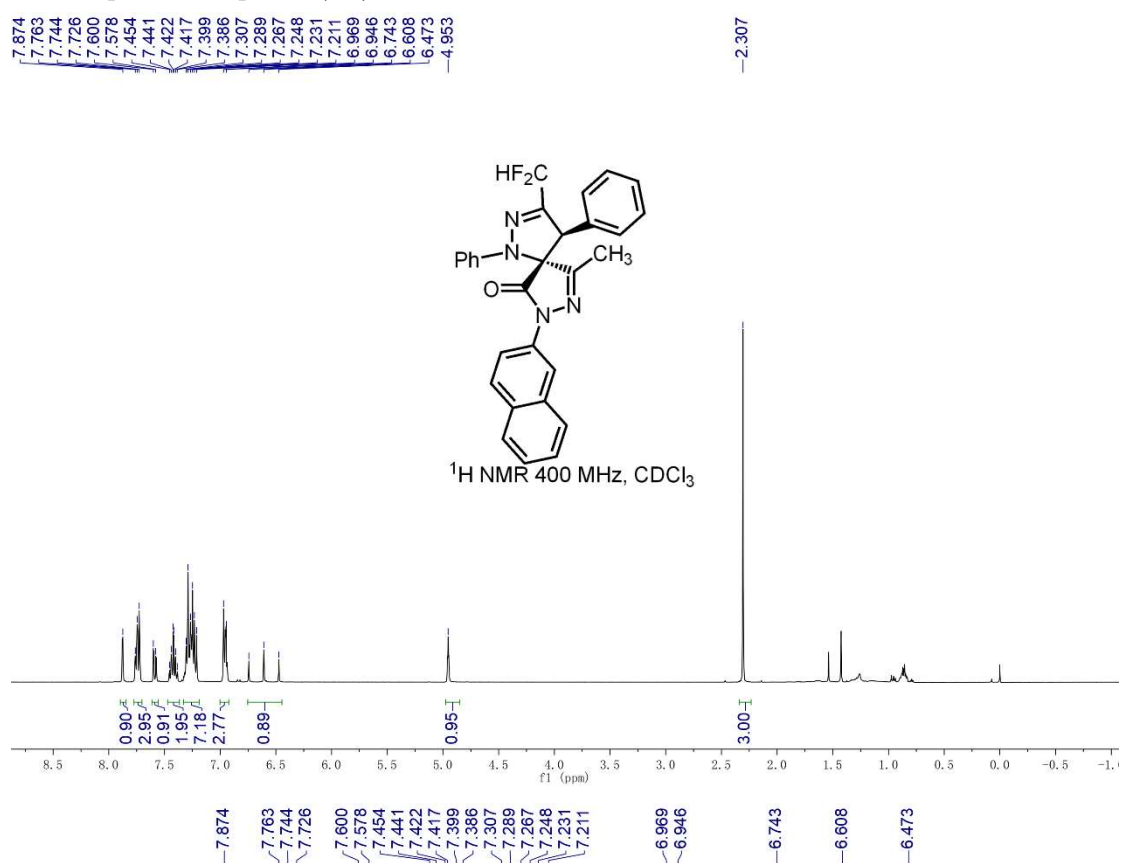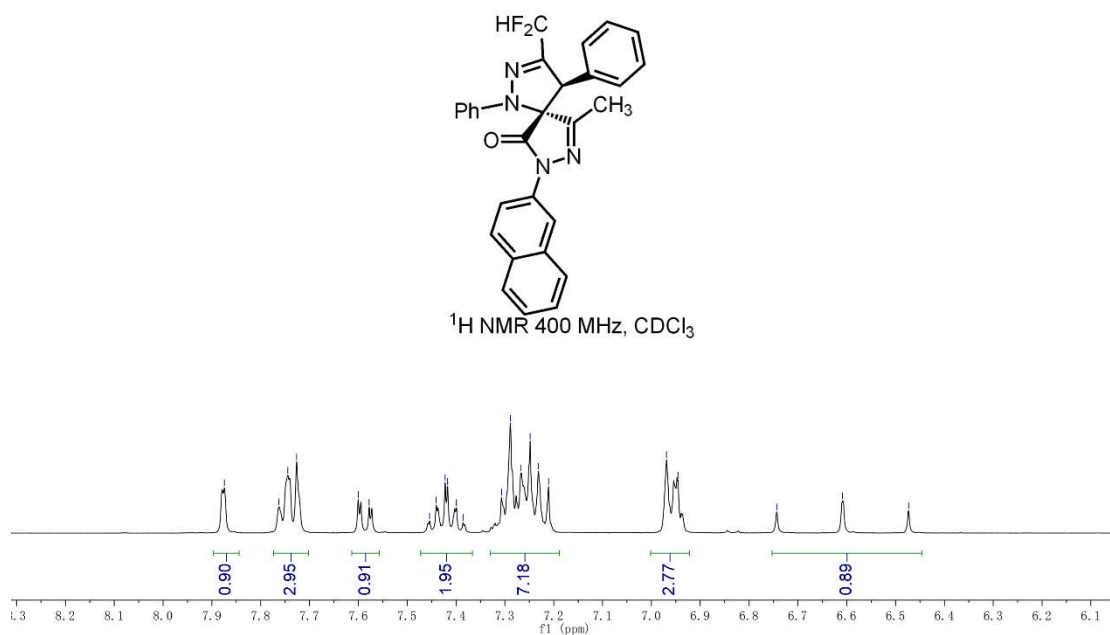

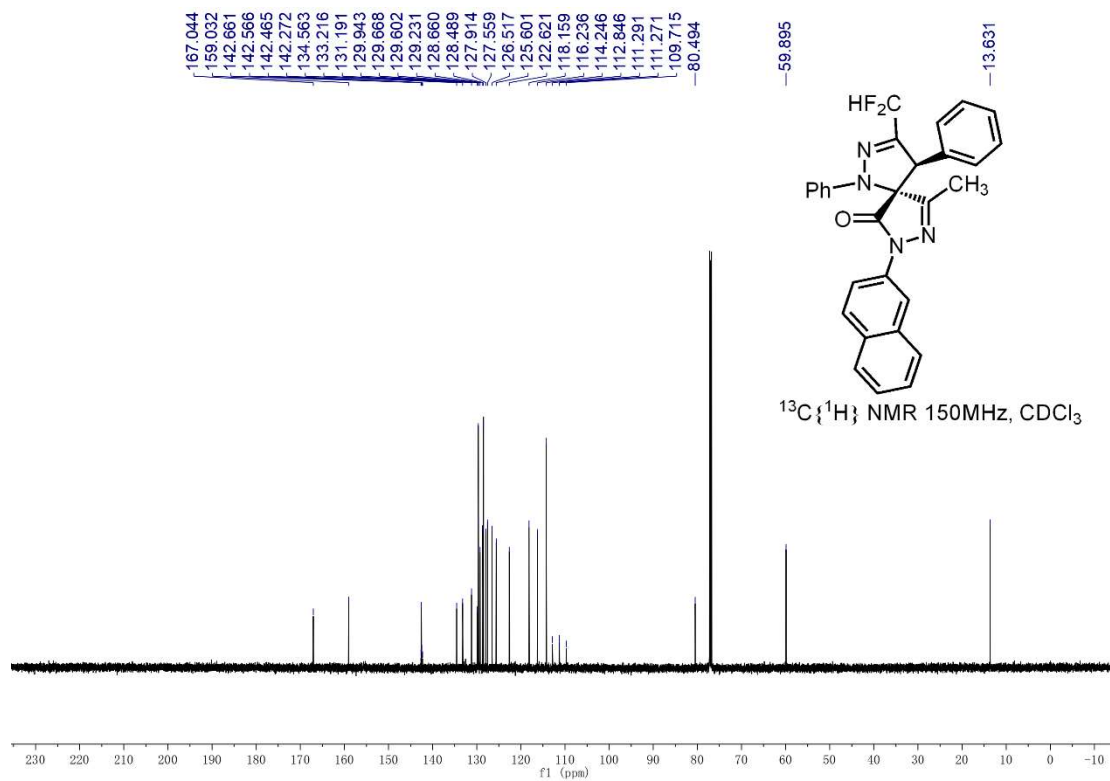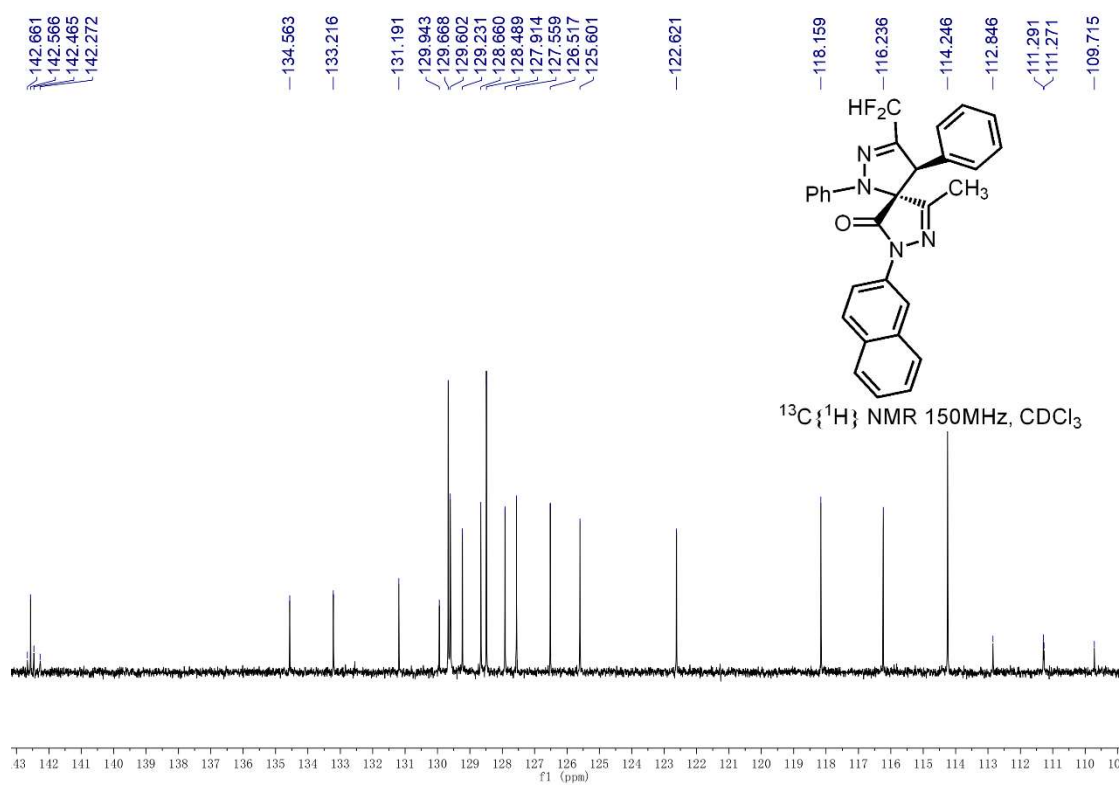



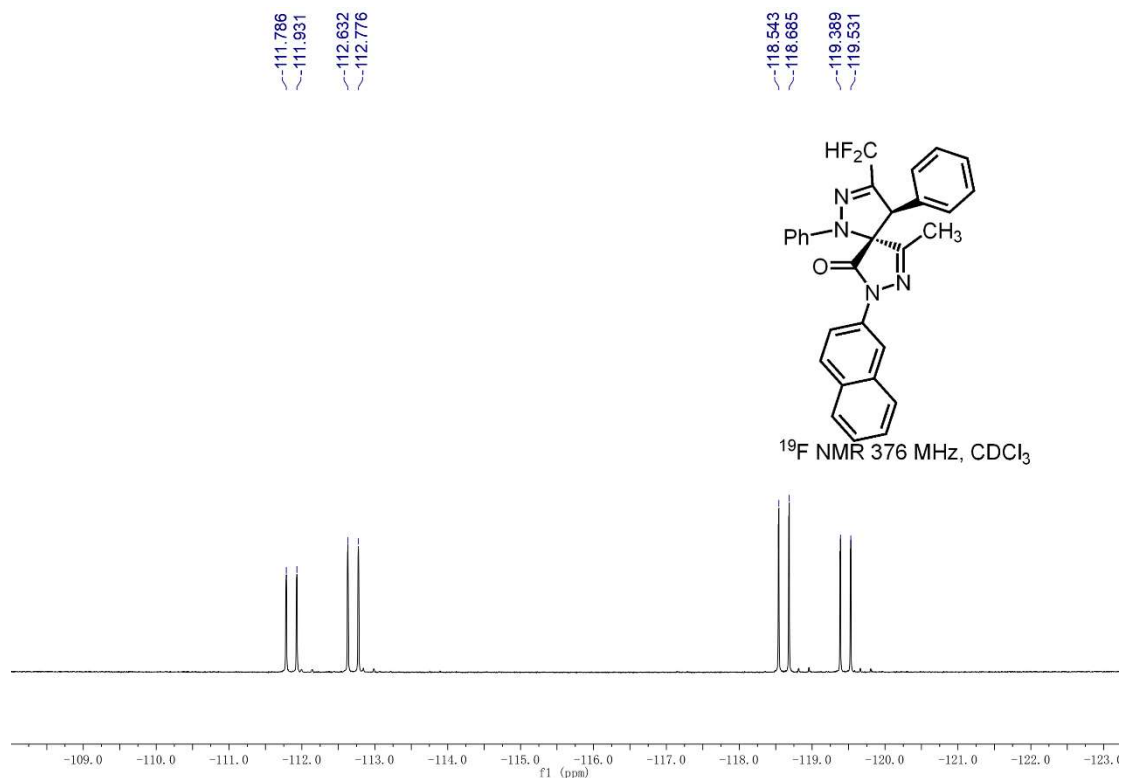

HRMS (ESI) copy of compound (*cis*)-40:

### Mass Spectrum SmartFormula Report

#### Analysis Info

Analysis Name D:\Data\user\NWNNU-fengyang 20230321-23.d  
 Method tune\_low.m  
 Sample Name A-581  
 Comment

Acquisition Date 2023-3-21 17:32:06

Operator BDAL@DE  
 Instrument / Ser# micrOTOF-Q 20453

#### Acquisition Parameter

|             |          |                       |           |                  |             |
|-------------|----------|-----------------------|-----------|------------------|-------------|
| Source Type | ESI      | Ion Polarity          | Positive  | Set Nebulizer    | 0.4 Bar     |
| Focus       | Active   | Set Capillary         | 4500 V    | Set Dry Heater   | 180 $\mu$ C |
| Scan Begin  | 50 m/z   | Set End Plate Offset  | -500 V    | Set Dry Gas      | 4.0 l/min   |
| Scan End    | 1000 m/z | Set Collision Cell RF | 400.0 Vpp | Set Divert Valve | Waste       |

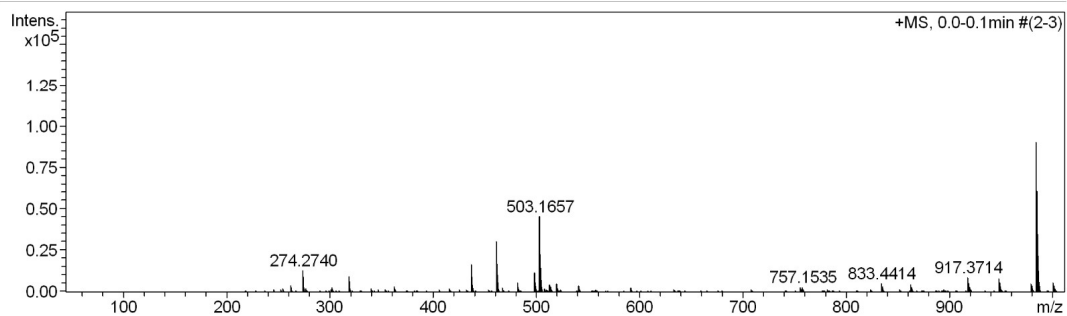

| Meas. #  | Formula                                                             | m/z      | err [ppm] | Me an err [ppm] | rdb  | N-R | ej% Conf | m Sig | Std l | St d | St d l | St d | Std Com b Dev |
|----------|---------------------------------------------------------------------|----------|-----------|-----------------|------|-----|----------|-------|-------|------|--------|------|---------------|
| 503.1657 | 1 C <sub>29</sub> H <sub>22</sub> F <sub>2</sub> N <sub>4</sub> NaO | 503.1654 | -0.7      | -0.6            | 19.5 | ok  | even     | 7.6   | 12.0  | 0.7  | 6.2    | 1.9  | 842.7         |

NMR copies of compound (*trans*)-4p:

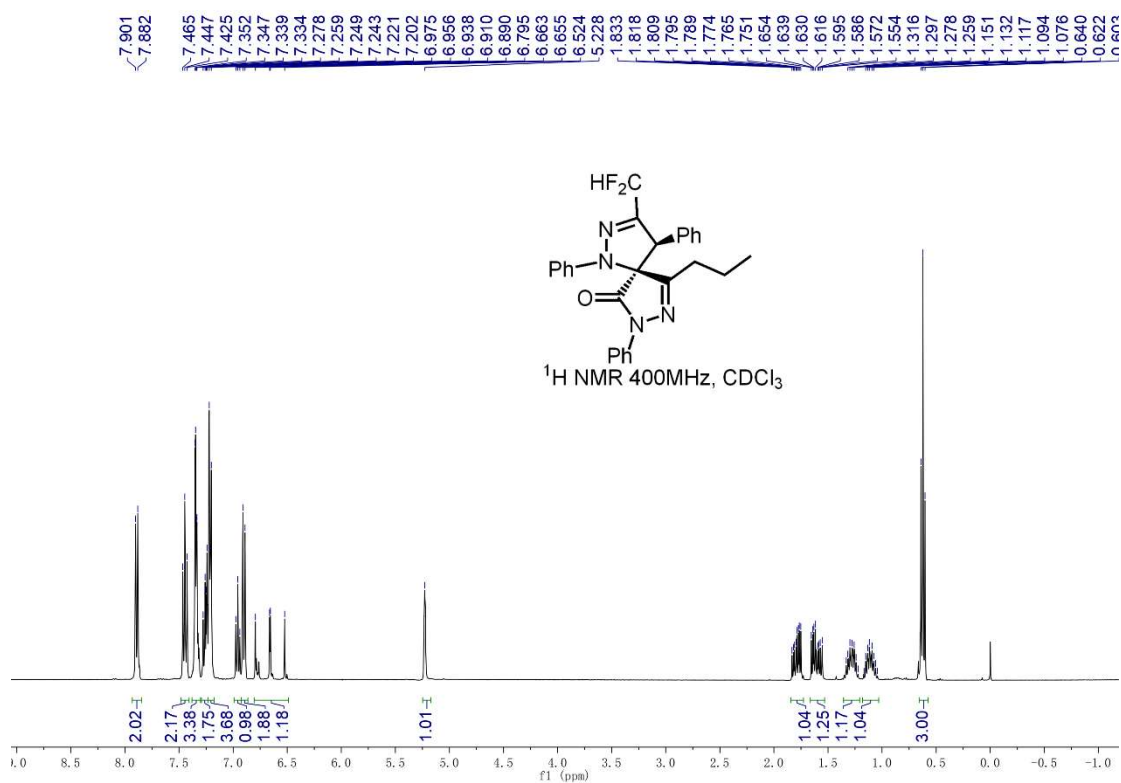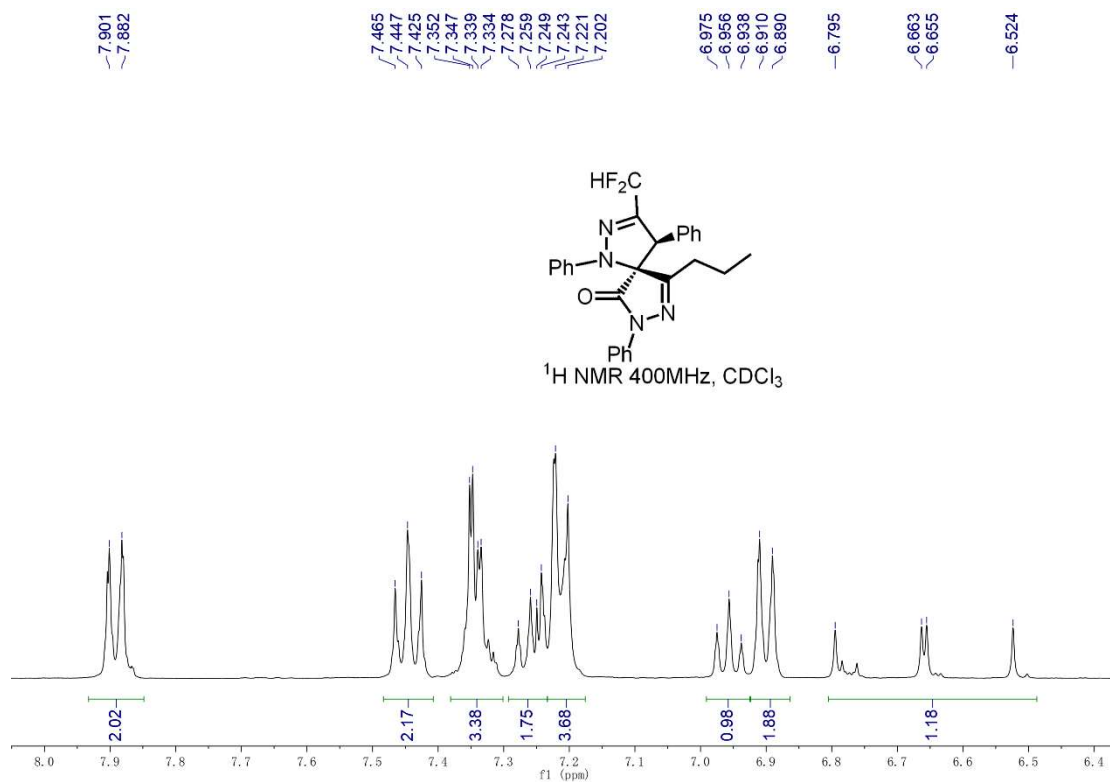

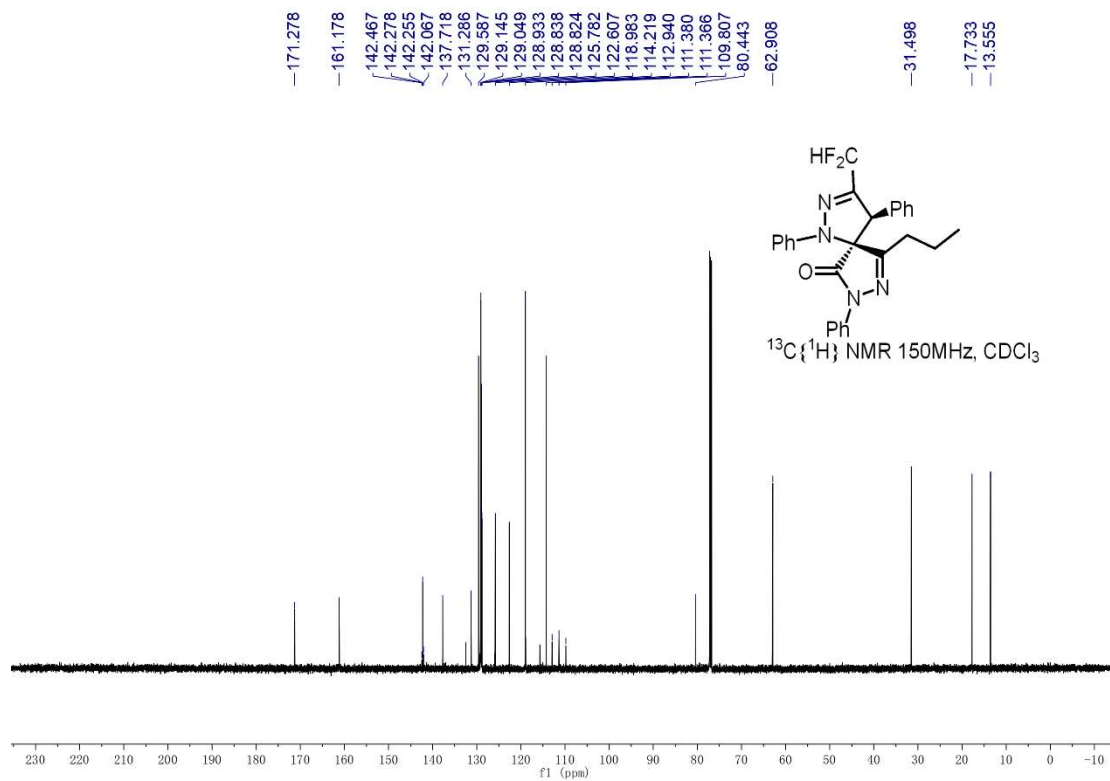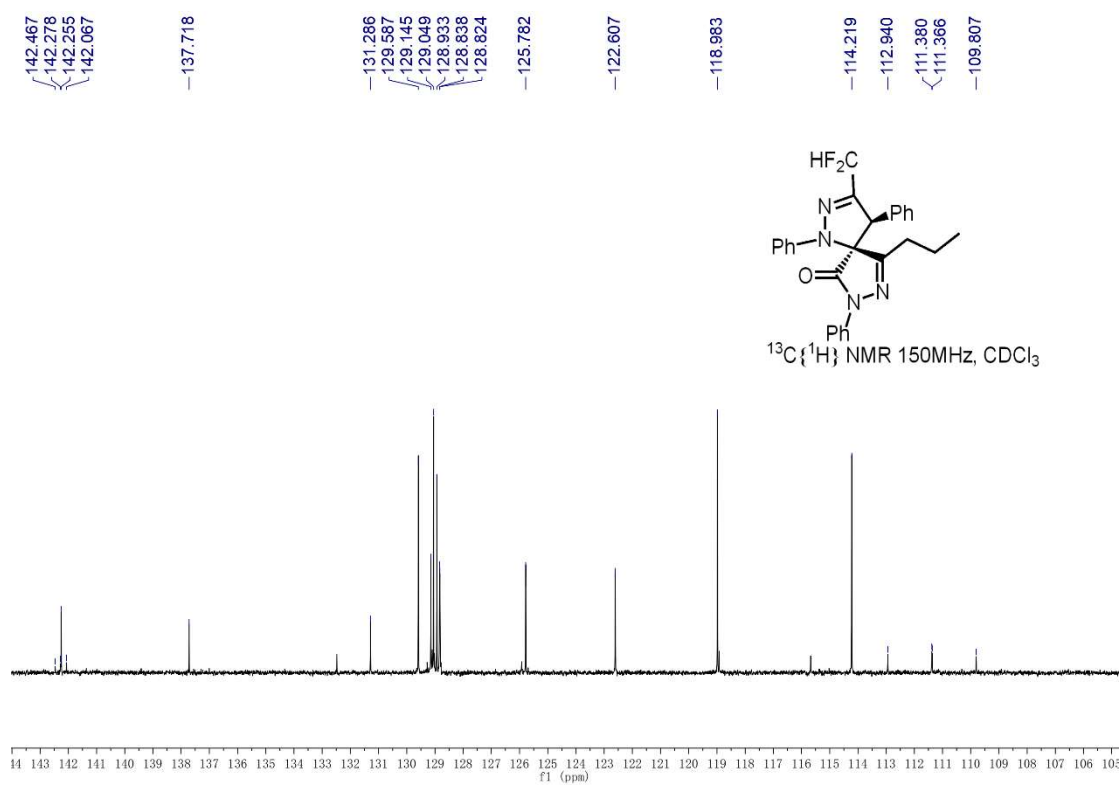

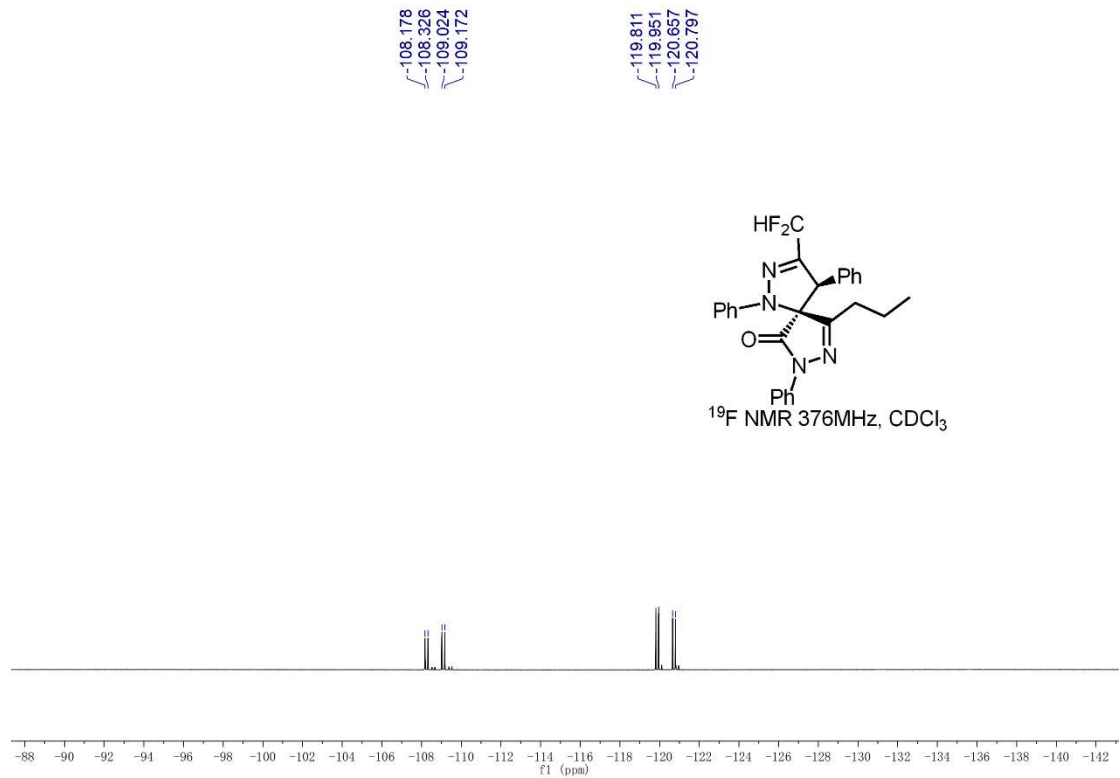

HRMS (ESI) copy of compound (*trans*)-4p:

### Mass Spectrum SmartFormula Report

#### Analysis Info

Analysis Name D:\Data\user\NWNW-fengyang 20230321-24.d  
 Method tune\_low.m  
 Sample Name A-55  
 Comment

Acquisition Date 2023-3-21 17:34:17

Operator BDAL@DE  
 Instrument / Ser# microTOF-Q 20453

#### Acquisition Parameter

|             |          |                       |           |                  |           |
|-------------|----------|-----------------------|-----------|------------------|-----------|
| Source Type | ESI      | Ion Polarity          | Positive  | Set Nebulizer    | 0.4 Bar   |
| Focus       | Active   | Set Capillary         | 4500 V    | Set Dry Heater   | 180 j°C   |
| Scan Begin  | 50 m/z   | Set End Plate Offset  | -500 V    | Set Dry Gas      | 4.0 l/min |
| Scan End    | 1000 m/z | Set Collision Cell RF | 400.0 Vpp | Set Divert Valve | Waste     |

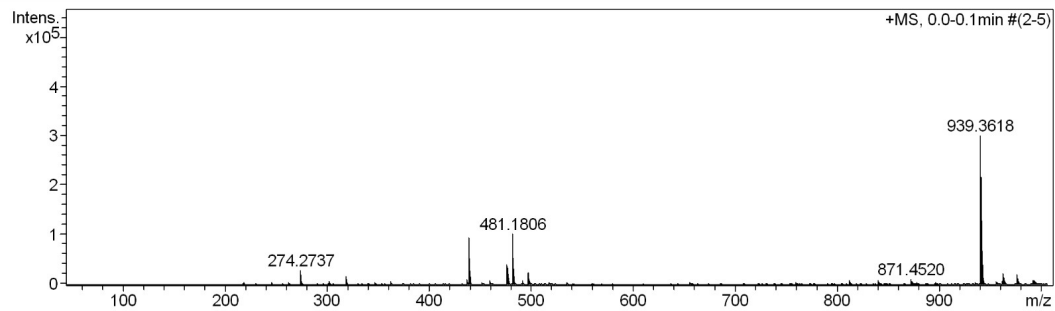

| Meas. #  | Formula                                                             | m/z      | err [ppm] | Me an err [ppm] | rdb  | N-R | ej   | Conf | mS  | Std | Std | Std | Std   | Std |
|----------|---------------------------------------------------------------------|----------|-----------|-----------------|------|-----|------|------|-----|-----|-----|-----|-------|-----|
| m/z      |                                                                     |          |           |                 |      |     |      |      |     |     |     |     |       |     |
| 481.1806 | 1 C <sub>27</sub> H <sub>24</sub> F <sub>2</sub> N <sub>4</sub> NaO | 481.1810 | 0.9       | 1.9             | 16.5 | ok  | even | 3.7  | 6.0 | 1.2 | 3.3 | 1.9 | 842.7 |     |

NMR copies of compound (*cis*)-4p:

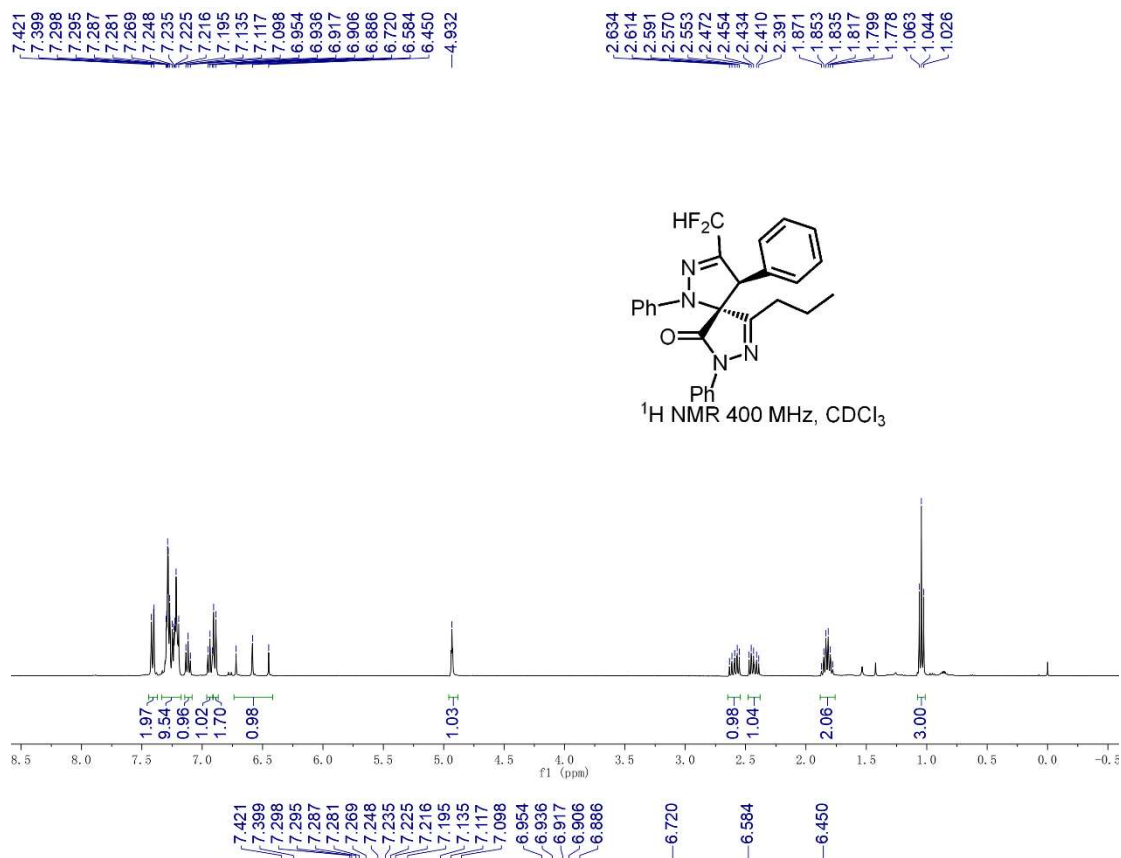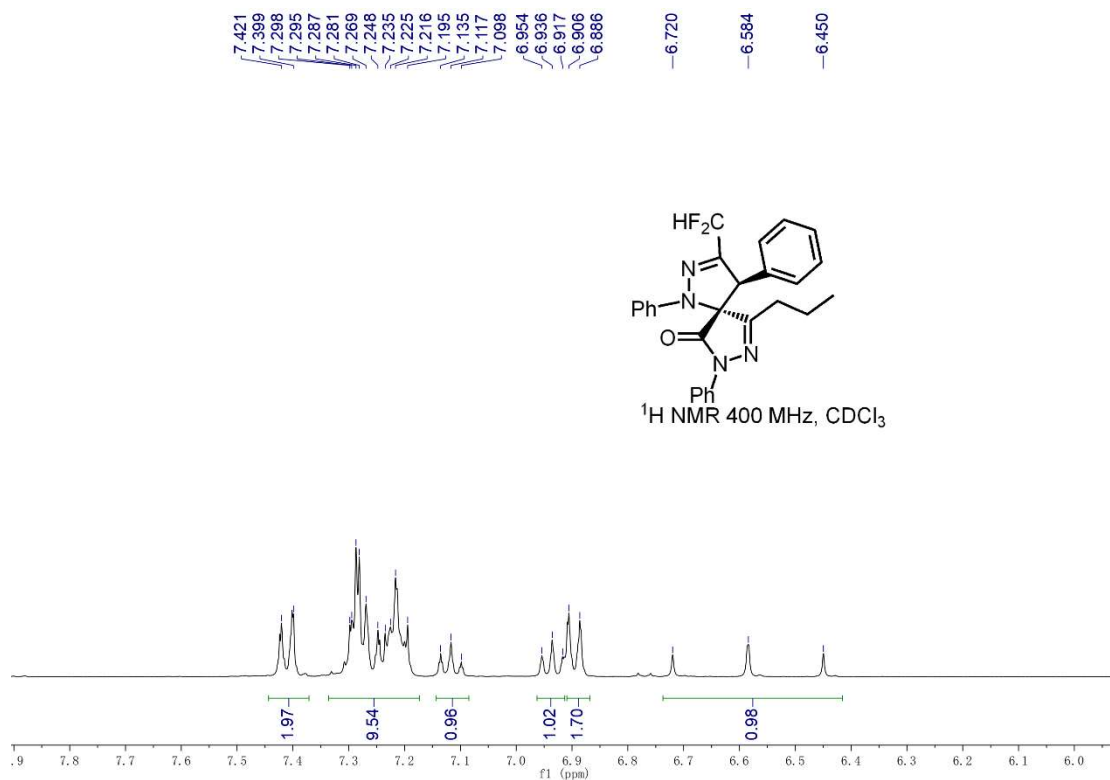

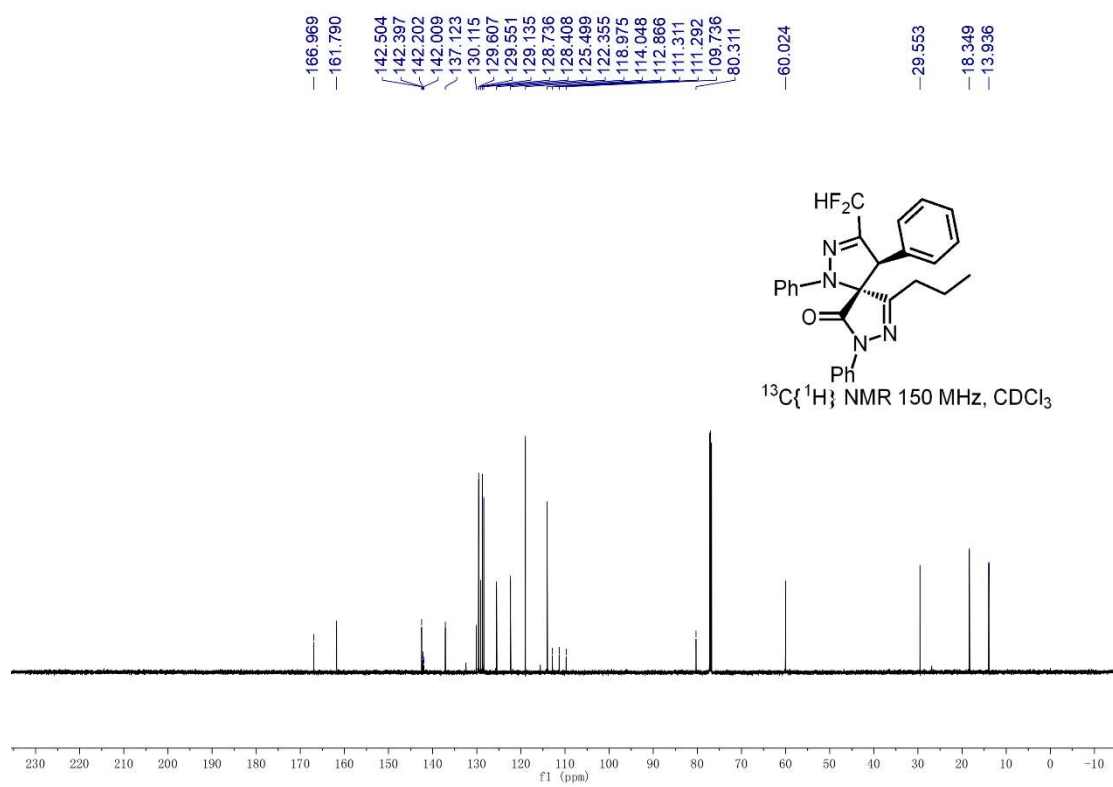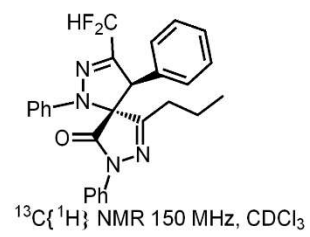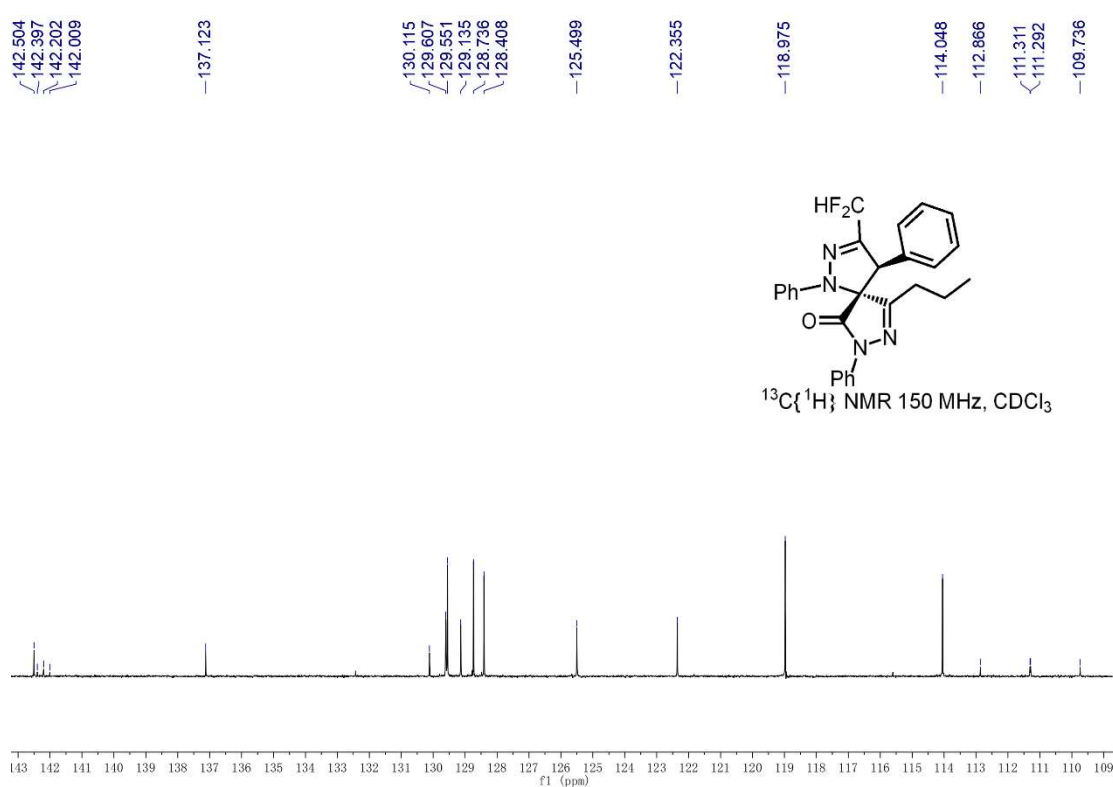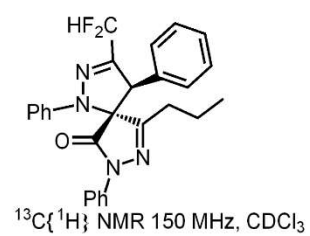

~111.689  
~111.833

~112.533  
~112.678

~118.563  
~118.704

~119.407  
~119.549

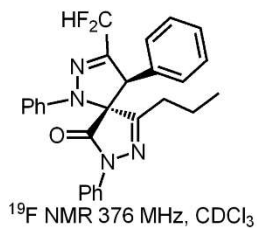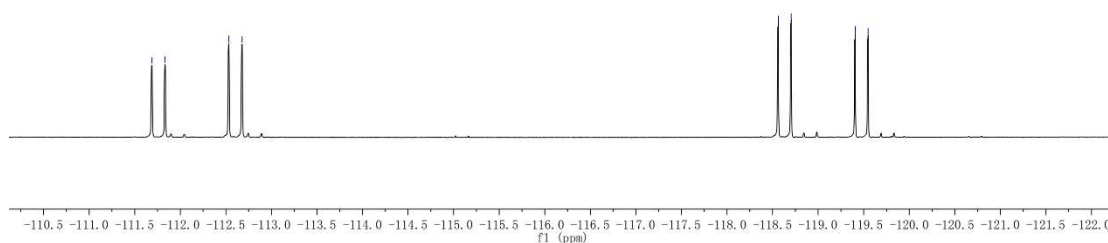

HRMS (ESI) copy of compound (*cis*)-4p:

### Mass Spectrum SmartFormula Report

#### Analysis Info

Analysis Name D:\Data\user\NWNW-fengyang 20230321--25.d  
Method tune\_low.m  
Sample Name A-551  
Comment

Acquisition Date 2023-3-21 17:37:43

Operator BDAL@DE  
Instrument / Ser# micrOTOF-Q 20453

#### Acquisition Parameter

|             |          |                       |           |                  |           |
|-------------|----------|-----------------------|-----------|------------------|-----------|
| Source Type | ESI      | Ion Polarity          | Positive  | Set Nebulizer    | 0.4 Bar   |
| Focus       | Active   | Set Capillary         | 4500 V    | Set Dry Heater   | 180 j°C   |
| Scan Begin  | 50 m/z   | Set End Plate Offset  | -500 V    | Set Dry Gas      | 4.0 l/min |
| Scan End    | 1000 m/z | Set Collision Cell RF | 400.0 Vpp | Set Divert Valve | Waste     |

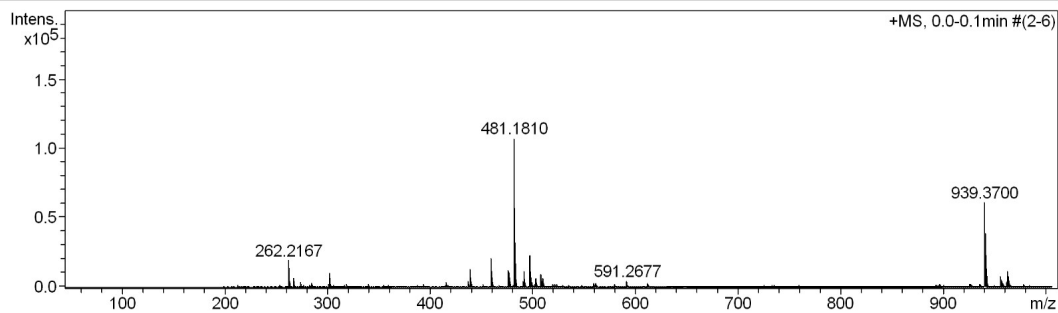

| Meas. #  | Formula                                                             | m/z      | err [ppm] | Me an err [ppm] | rdb  | N-R | ej% Conf | mS  | Std | Std | Std | Std  | Std   |
|----------|---------------------------------------------------------------------|----------|-----------|-----------------|------|-----|----------|-----|-----|-----|-----|------|-------|
| m/z      |                                                                     |          |           |                 |      |     |          |     | l   | Me  | l   | m/   | Com   |
|          |                                                                     |          |           |                 |      |     |          |     |     | an  | Va  | rN   | z     |
|          |                                                                     |          |           |                 |      |     |          |     |     | m/  | rN  | Diff | Dev   |
|          |                                                                     |          |           |                 |      |     |          |     |     | z   | or  |      |       |
|          |                                                                     |          |           |                 |      |     |          |     |     | m   |     |      |       |
| 481.1810 | 1 C <sub>27</sub> H <sub>24</sub> F <sub>2</sub> N <sub>4</sub> NaO | 481.1810 | 0.1       | 0.9             | 16.5 | ok  | even     | 4.4 | 6.4 | 1.1 | 3.3 | 3.0  | 842.7 |

NMR copies of compound (*trans*)-6a:

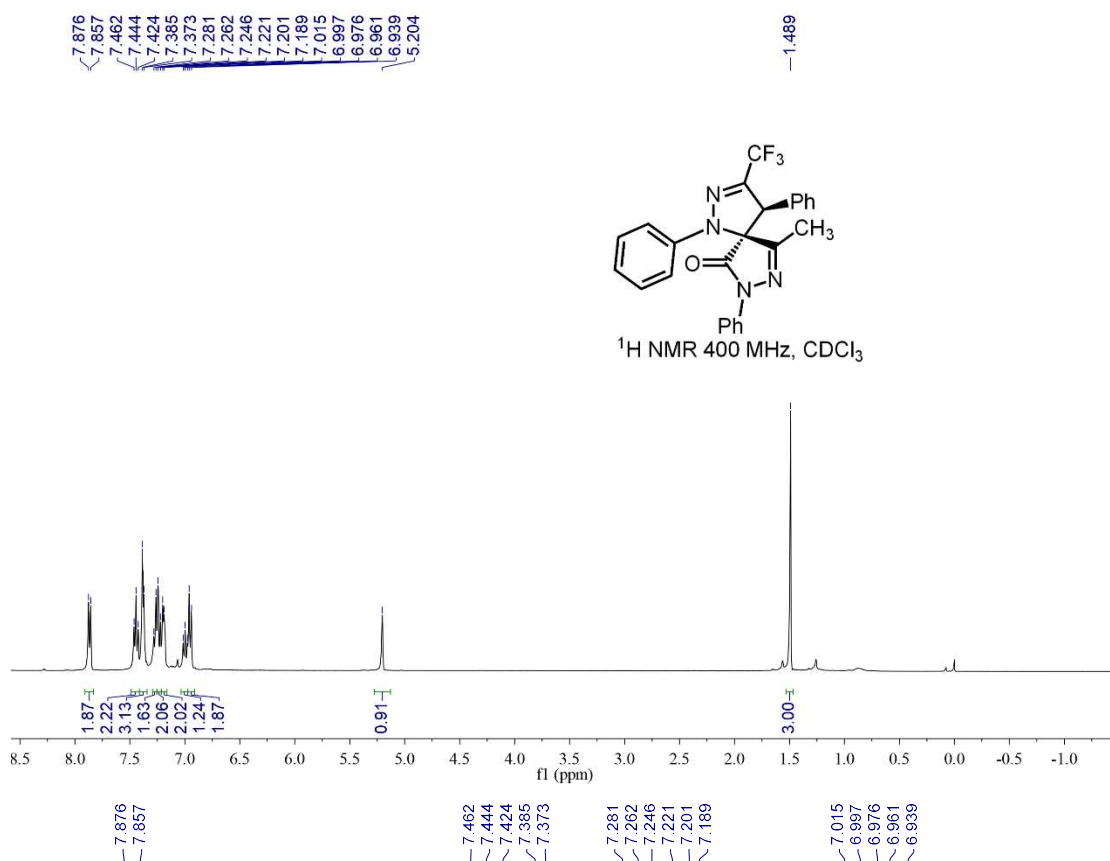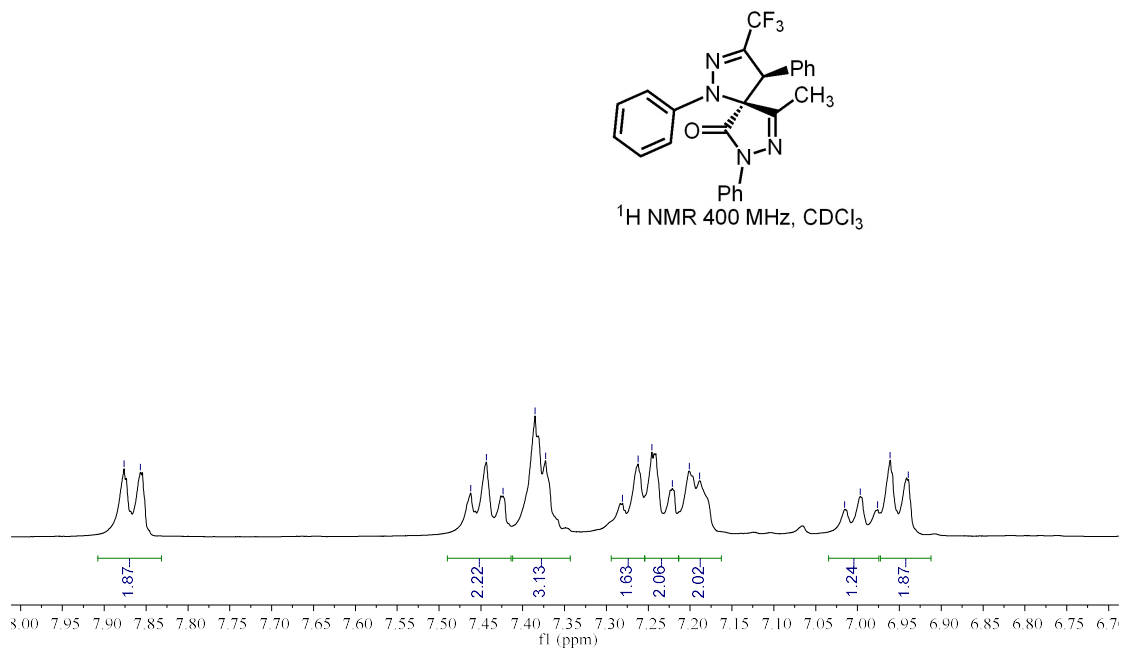



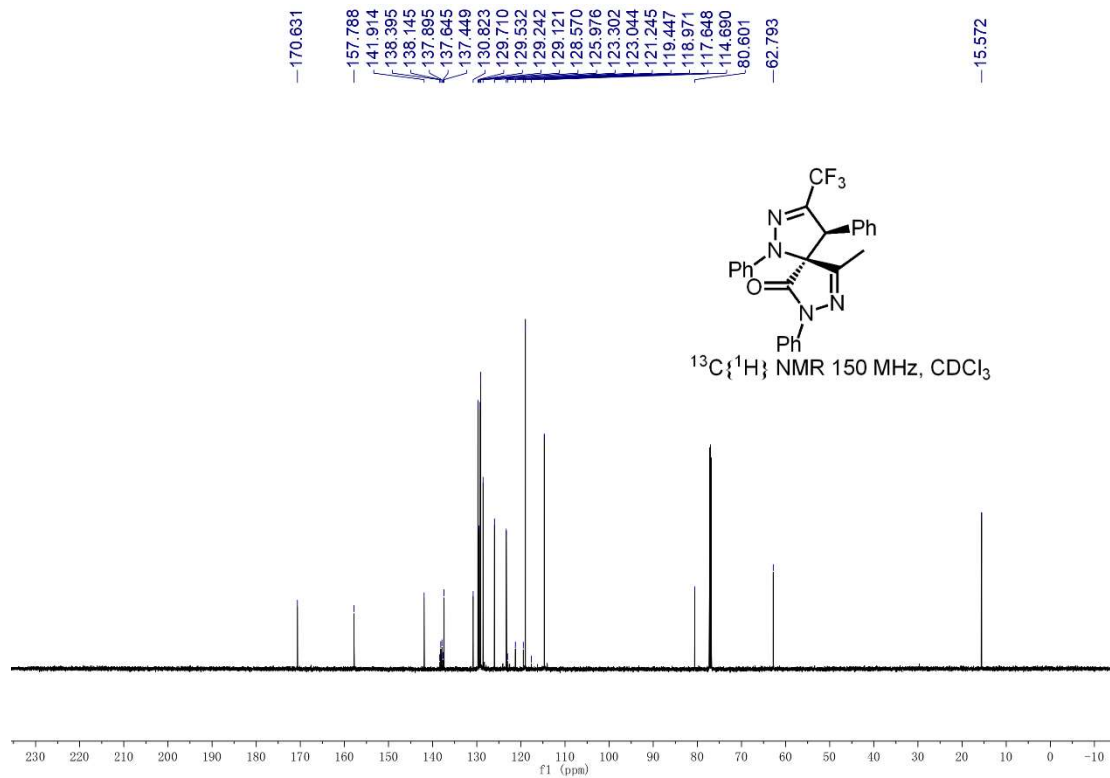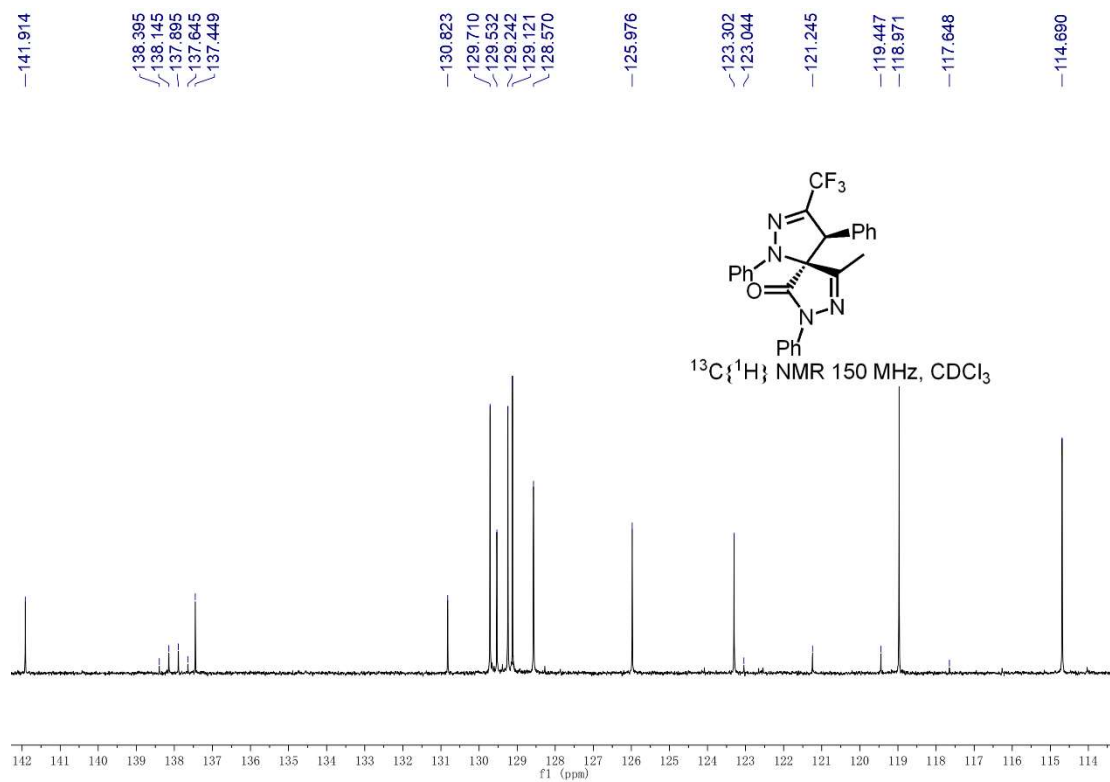

-86.742

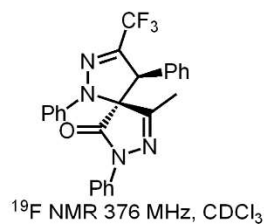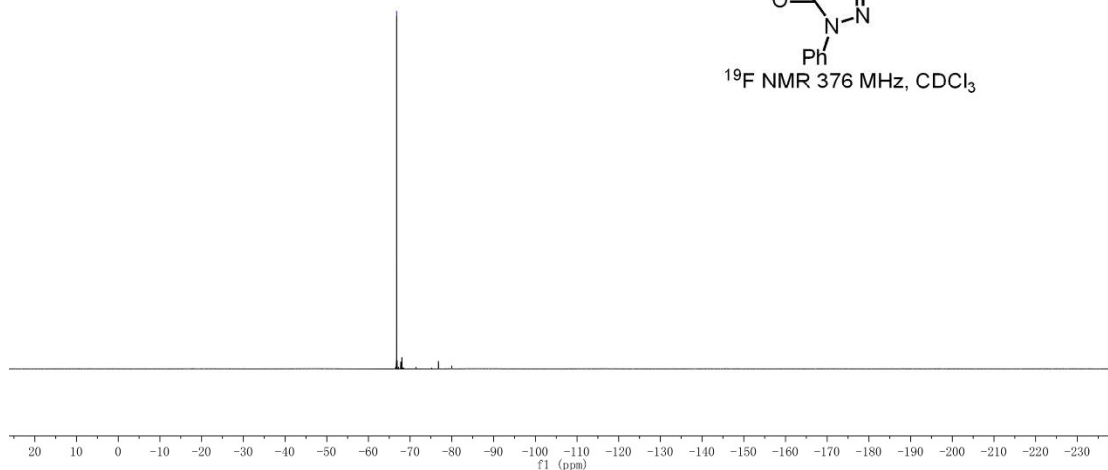

HRMS (ESI) copy of compound (*trans*)-6a:

### Mass Spectrum SmartFormula Report

#### Analysis Info

Analysis Name D:\Data\user\maransong20211202-1.d  
Method tune\_low.m  
Sample Name 2-01  
Comment

Acquisition Date 2021-12-2 17:39:19  
Operator BDAL@DE  
Instrument / Ser# micrOTOF-Q 20453

#### Acquisition Parameter

|             |          |                       |           |                  |           |
|-------------|----------|-----------------------|-----------|------------------|-----------|
| Source Type | ESI      | Ion Polarity          | Positive  | Set Nebulizer    | 0.4 Bar   |
| Focus       | Active   | Set Capillary         | 4500 V    | Set Dry Heater   | 180 °C    |
| Scan Begin  | 100 m/z  | Set End Plate Offset  | -500 V    | Set Dry Gas      | 4.0 l/min |
| Scan End    | 1000 m/z | Set Collision Cell RF | 500.0 Vpp | Set Divert Valve | Waste     |

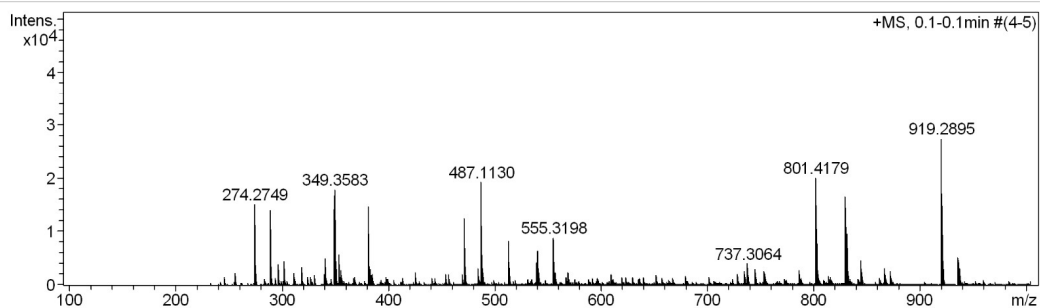

| Meas. #  | Formula                                                             | m/z      | err [ppm] | Me an err [ppm] | rdb  | N- ul e | e; f | mSi gm a | Std l | St d Me an m/z | Std Var m | St d Nor m | St d Dif f | Std Com b Dev |
|----------|---------------------------------------------------------------------|----------|-----------|-----------------|------|---------|------|----------|-------|----------------|-----------|------------|------------|---------------|
| 471.1404 | 1 C <sub>25</sub> H <sub>19</sub> F <sub>3</sub> N <sub>4</sub> NaO | 471.1403 | -0.2      | -0.6            | 16.5 | ok      | even | 23.4     | 31.8  | 0.4            | 24.6      | 0.8        | 842.7      |               |

NMR copies of compound (*cis*)-**6a**:

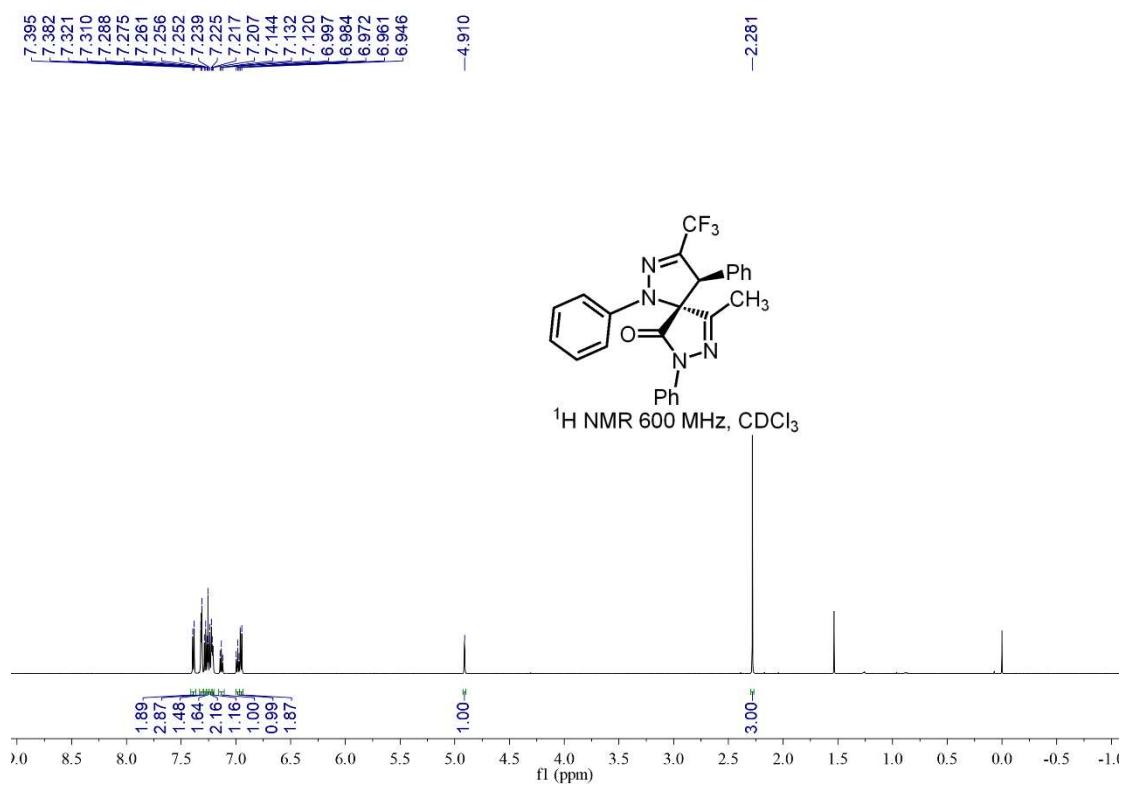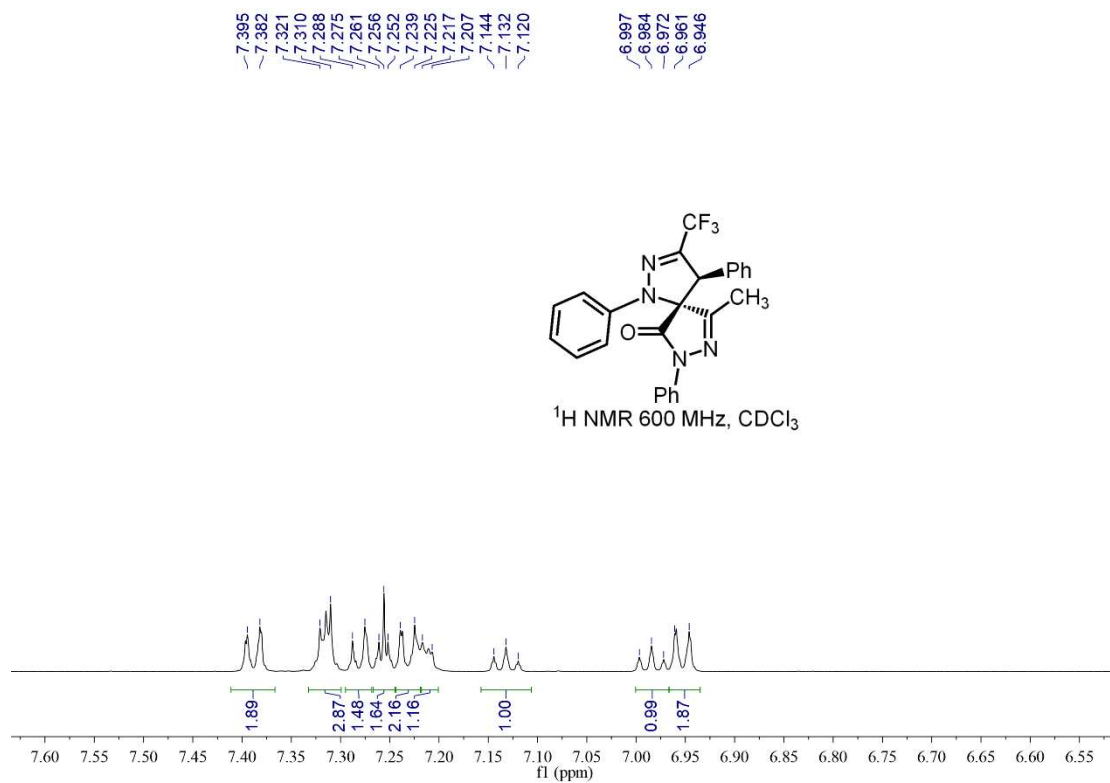

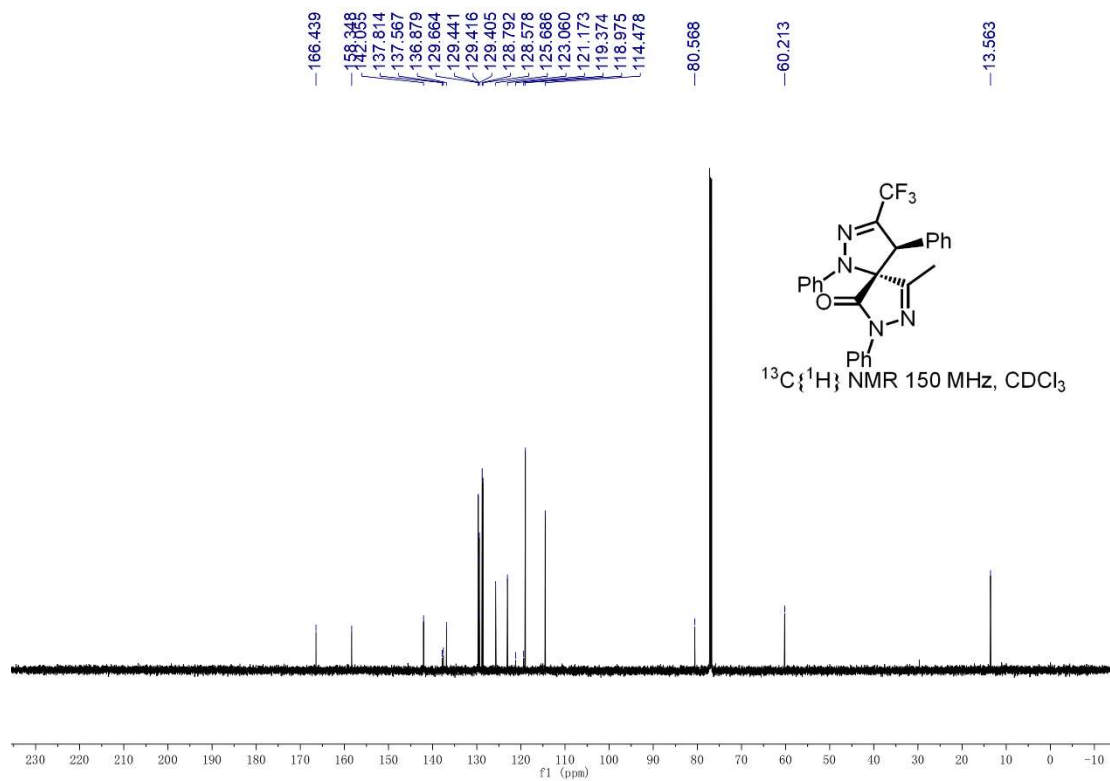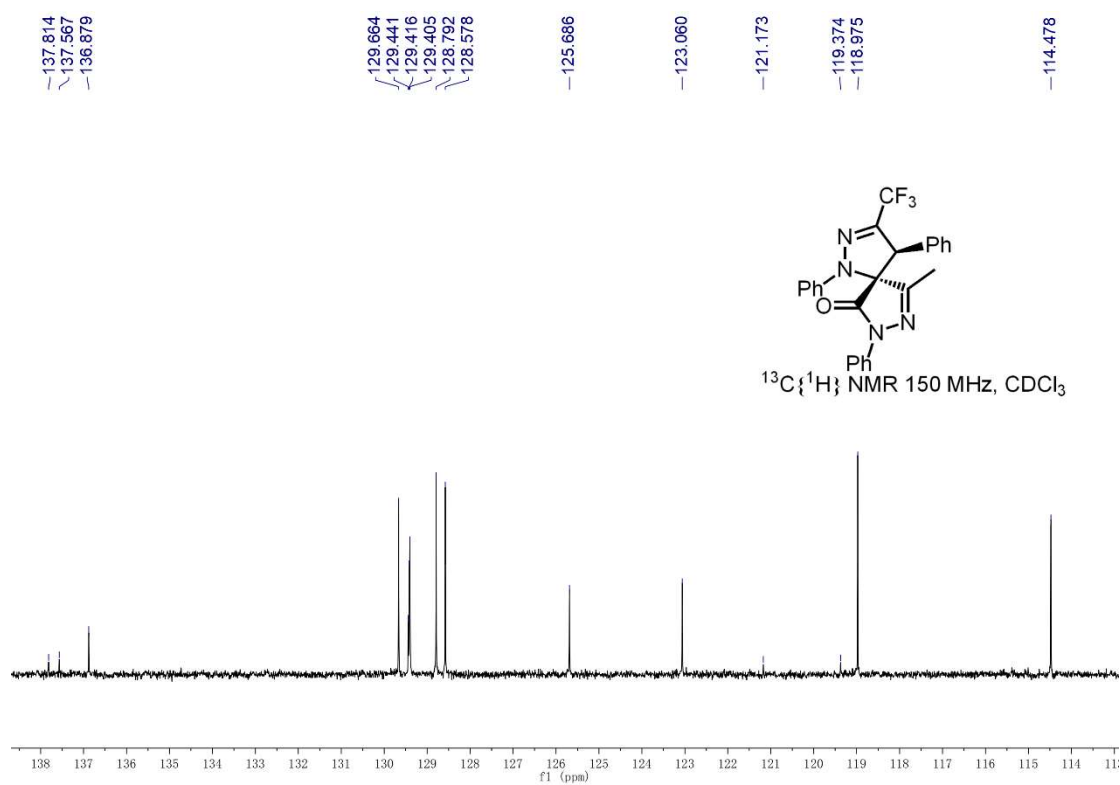

--62.479

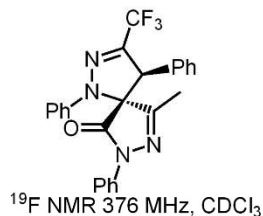

HRMS (ESI) copy of compound (*cis*)-**6a**:

### Mass Spectrum SmartFormula Report

#### Analysis Info

Analysis Name D:\Data\user\maransong20211202-2.d  
Method tune\_low.m  
Sample Name 2-02  
Comment

Acquisition Date 2021-12-2 17:41:54  
Operator BDAL@DE  
Instrument / Ser# micrOTOF-Q 20453

#### Acquisition Parameter

|             |          |                       |           |                  |           |
|-------------|----------|-----------------------|-----------|------------------|-----------|
| Source Type | ESI      | Ion Polarity          | Positive  | Set Nebulizer    | 0.4 Bar   |
| Focus       | Active   | Set Capillary         | 4500 V    | Set Dry Heater   | 180 °C    |
| Scan Begin  | 100 m/z  | Set End Plate Offset  | -500 V    | Set Dry Gas      | 4.0 l/min |
| Scan End    | 1000 m/z | Set Collision Cell RF | 500.0 Vpp | Set Divert Valve | Waste     |

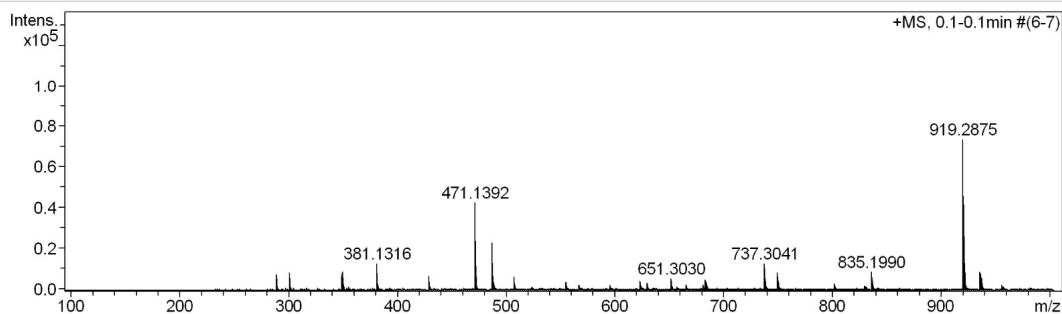

| Meas. #  | Formula                                                             | m/z      | err [ppm] | Me an err [ppm] | rdb  | N- R ul e | ej% Conf | mS ig ma | Std l | Std Me an m/z | Std l Va rN | Std m/ z Diff | Std Com b Dev |
|----------|---------------------------------------------------------------------|----------|-----------|-----------------|------|-----------|----------|----------|-------|---------------|-------------|---------------|---------------|
| 471.1392 | 1 C <sub>25</sub> H <sub>19</sub> F <sub>3</sub> N <sub>4</sub> NaO | 471.1403 | 2.3       | 2.6             | 16.5 | ok        | even     | 5.2      | 6.9   | 1.2           | 3.4         | 0.6           | 842.7         |

NMR copies of compound (*trans*)-**6b**:

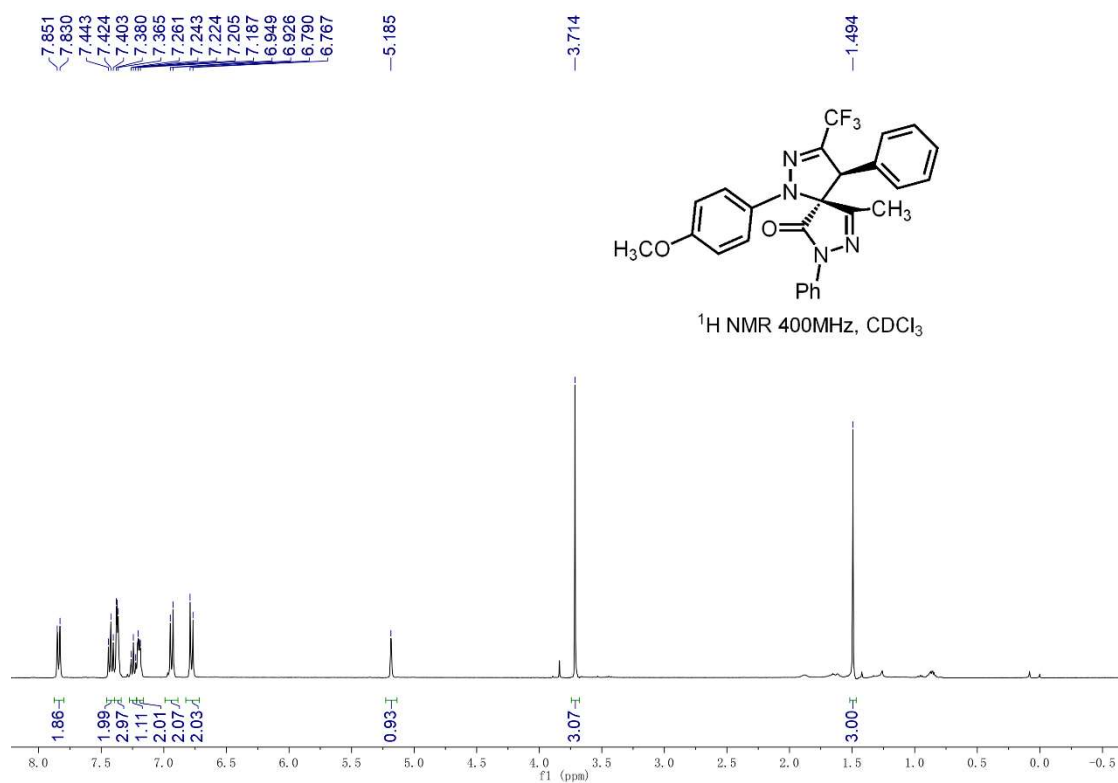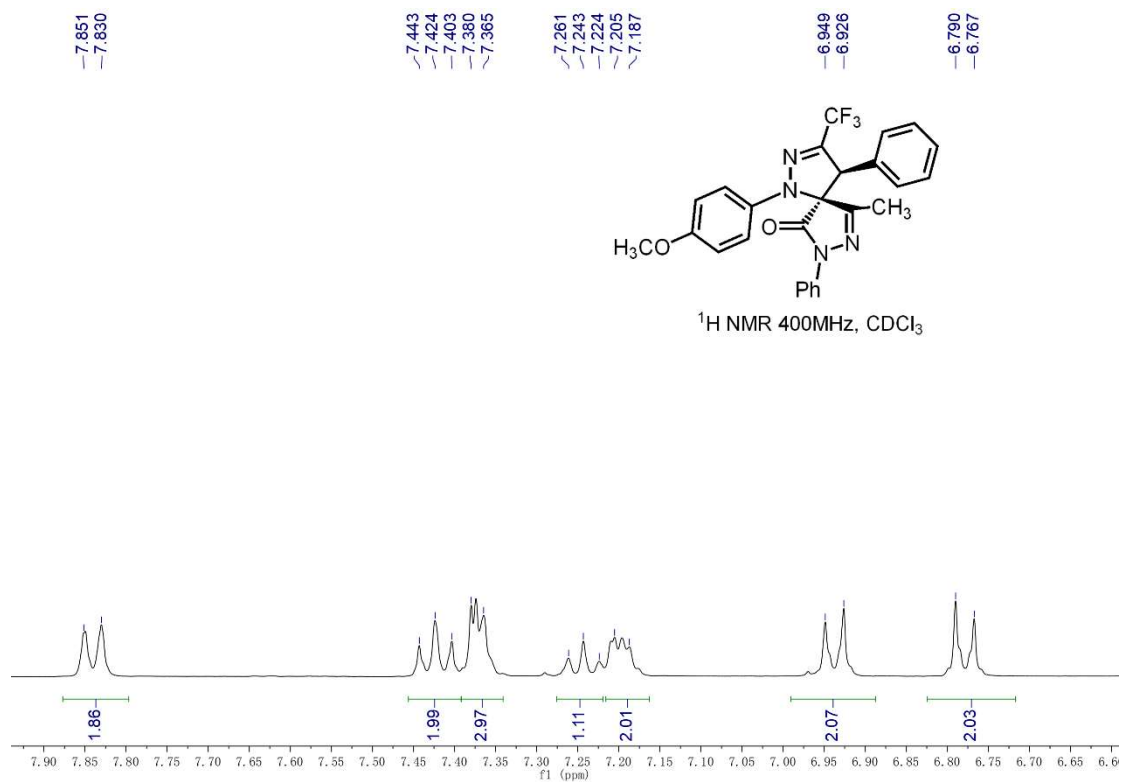

-170.661  
 -157.605  
 -156.272  
 -138.043  
 -137.793  
 -137.544  
 -137.407  
 -137.295  
 -135.594  
 -130.984  
 -129.425  
 -129.214  
 -129.068  
 -128.565  
 -125.879  
 -123.111  
 -121.314  
 -119.517  
 -118.906  
 -117.719  
 -117.502  
 -114.833  
 -81.501  
 -62.411  
 -55.436  
 -15.657

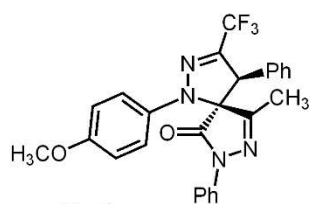

$^{13}\text{C}\{^1\text{H}\}$  NMR 150 MHz,  $\text{CDCl}_3$

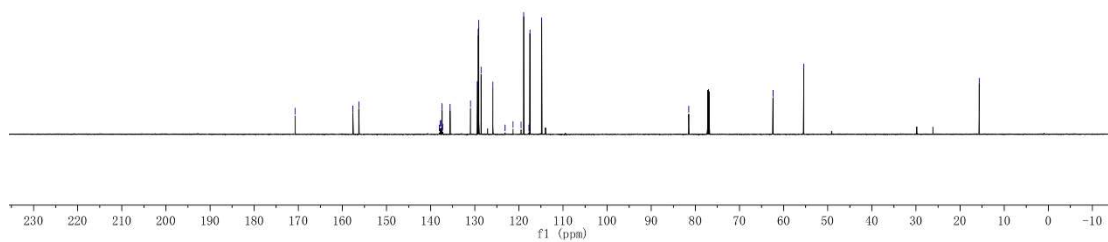

-138.043  
 -137.793  
 -137.544  
 -137.407  
 -137.295  
 -135.594  
 -130.984  
 -129.425  
 -129.214  
 -129.068  
 -128.565  
 -125.879  
 -123.111  
 -121.314  
 -119.517  
 -118.906  
 -117.719  
 -117.502  
 -114.833

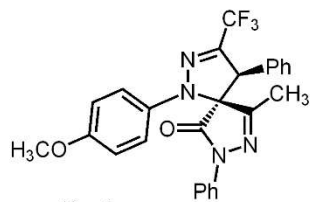

$^{13}\text{C}\{^1\text{H}\}$  NMR 150 MHz,  $\text{CDCl}_3$

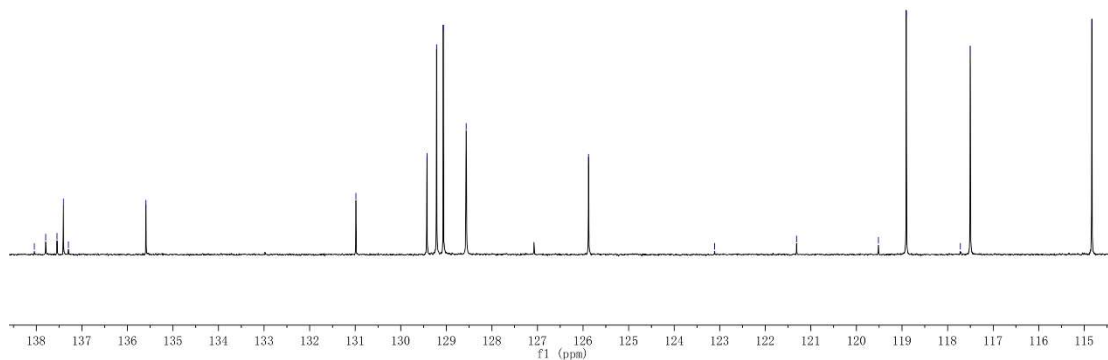

---61.559

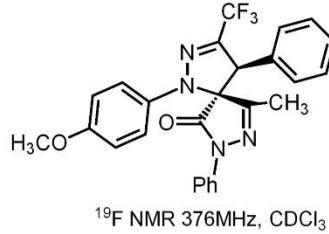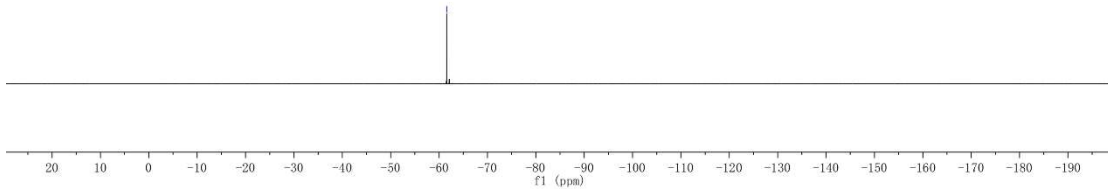

HRMS (ESI) copy of compound (*trans*)-**6b**:

### Mass Spectrum SmartFormula Report

#### Analysis Info

Analysis Name D:\Data\user\NWNNU-fengyang 20230322-1.d  
Method tune\_low.m  
Sample Name A-38  
Comment

Acquisition Date 2023-3-22 9:15:09

Operator BDAL@DE  
Instrument / Ser# micrOTOF-Q 20453

#### Acquisition Parameter

|             |          |                       |           |                  |           |
|-------------|----------|-----------------------|-----------|------------------|-----------|
| Source Type | ESI      | Ion Polarity          | Positive  | Set Nebulizer    | 0.4 Bar   |
| Focus       | Active   | Set Capillary         | 4500 V    | Set Dry Heater   | 180 j̄aC  |
| Scan Begin  | 50 m/z   | Set End Plate Offset  | -500 V    | Set Dry Gas      | 4.0 l/min |
| Scan End    | 1000 m/z | Set Collision Cell RF | 300.0 Vpp | Set Divert Valve | Waste     |

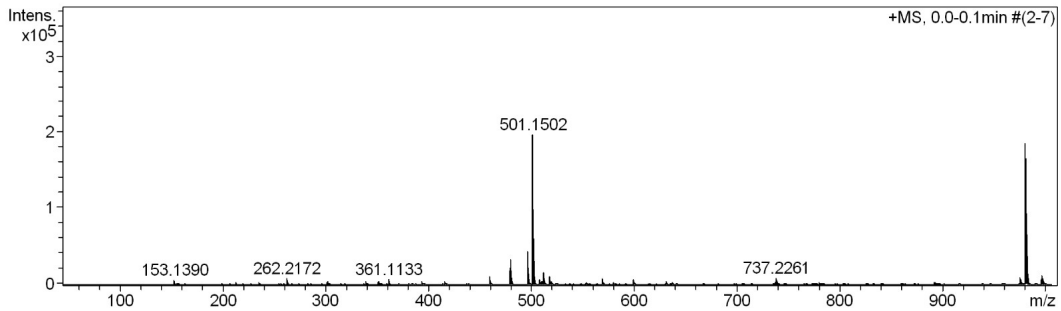

| Meas. #  | Formula                                                                          | m/z      | err [ppm] | Me an err [ppm] | rdb  | N-R | e <sub>i</sub> ¥ Conf | mS ig ma | Std l | Std Me an m/z | Std l Va rN or m | Std m/z Diff | Std Com b Dev |
|----------|----------------------------------------------------------------------------------|----------|-----------|-----------------|------|-----|-----------------------|----------|-------|---------------|------------------|--------------|---------------|
| 501.1502 | 1 C <sub>26</sub> H <sub>21</sub> F <sub>3</sub> N <sub>4</sub> NaO <sub>2</sub> | 501.1509 | 1.4       | 0.8             | 16.5 | ok  | even                  | 5.2      | 8.1   | 0.7           | 3.7              | 1.2          | 842.7         |



NMR copies of compound (*cis*)-**6b**:

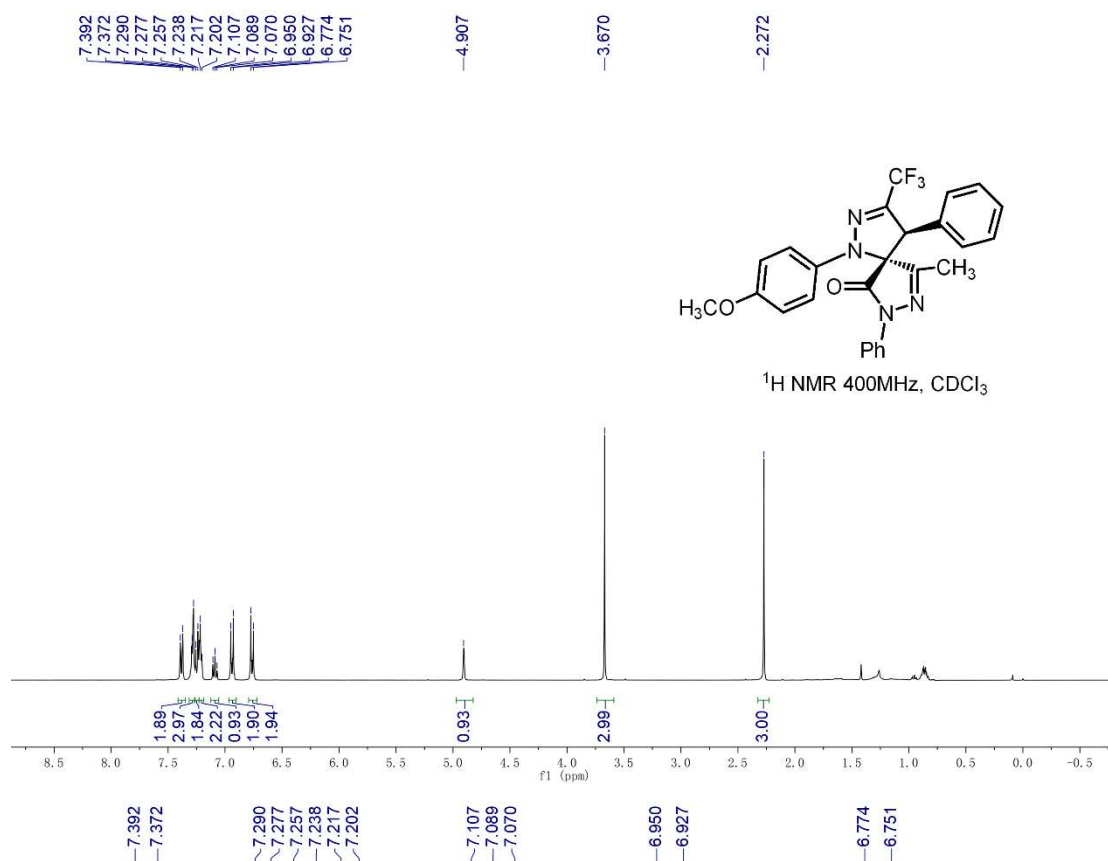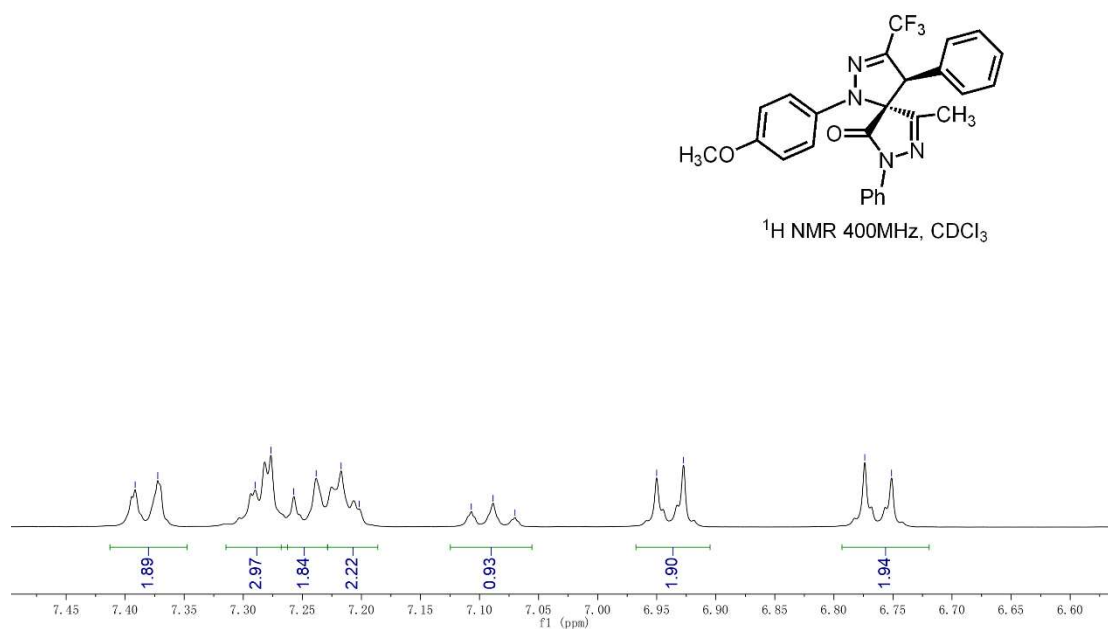

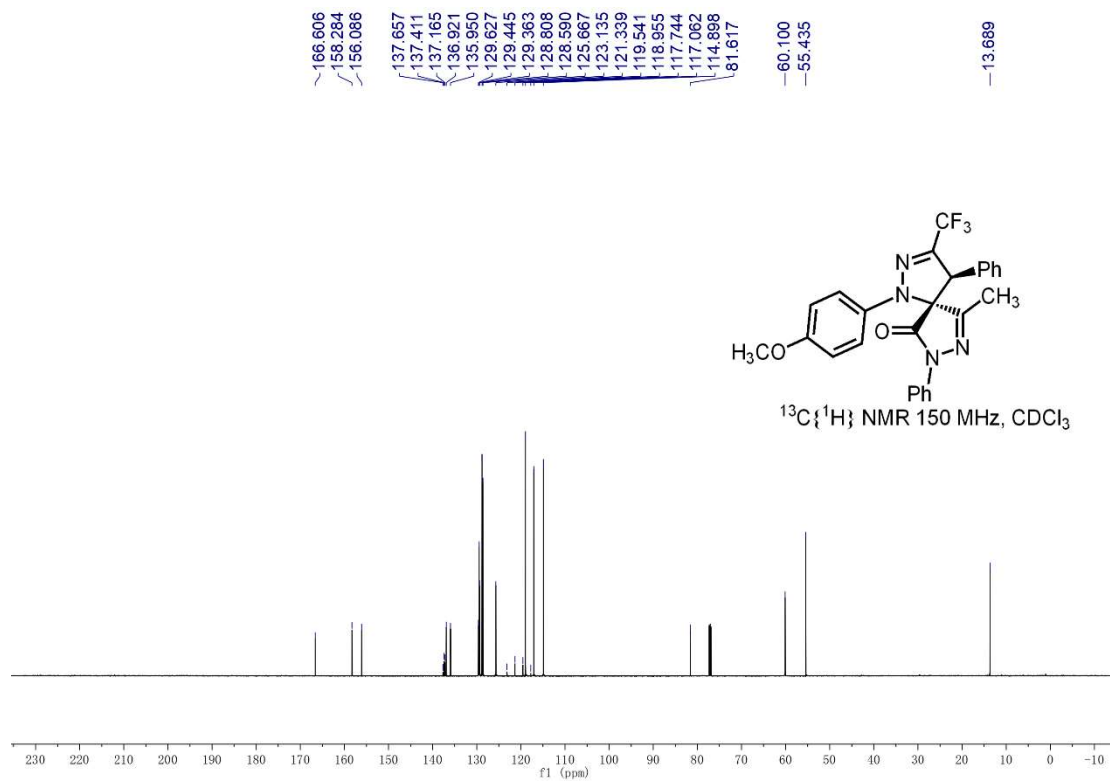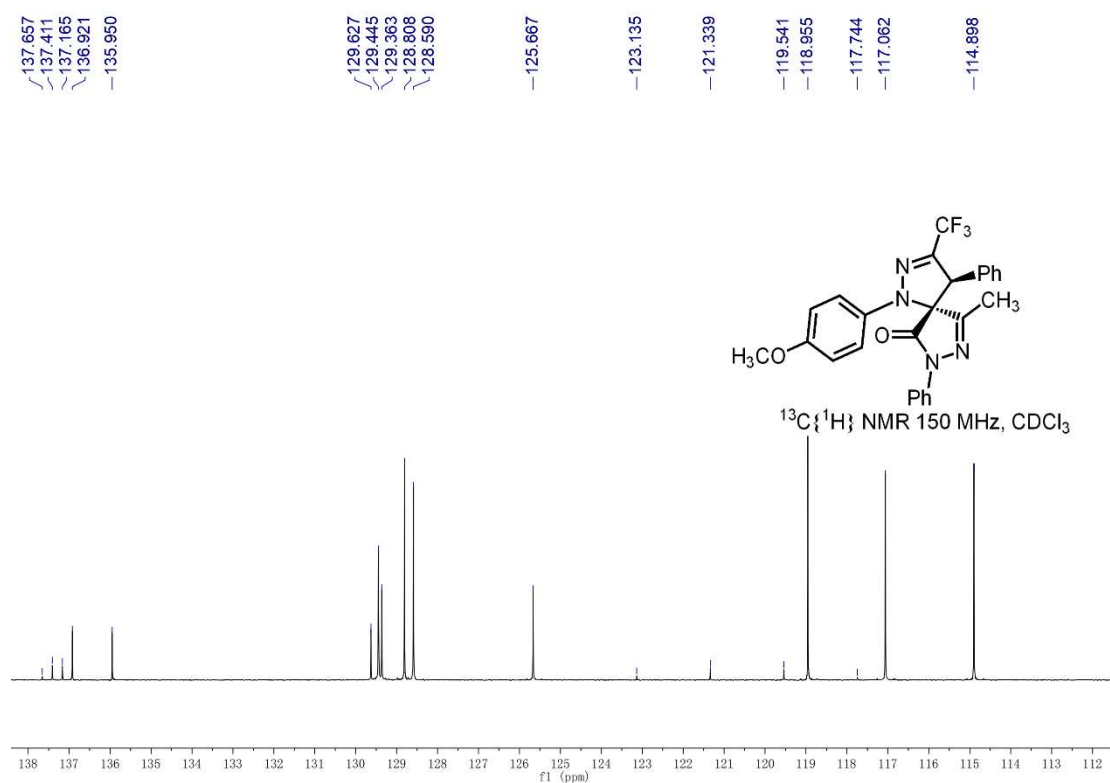

61.909

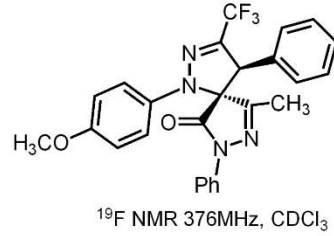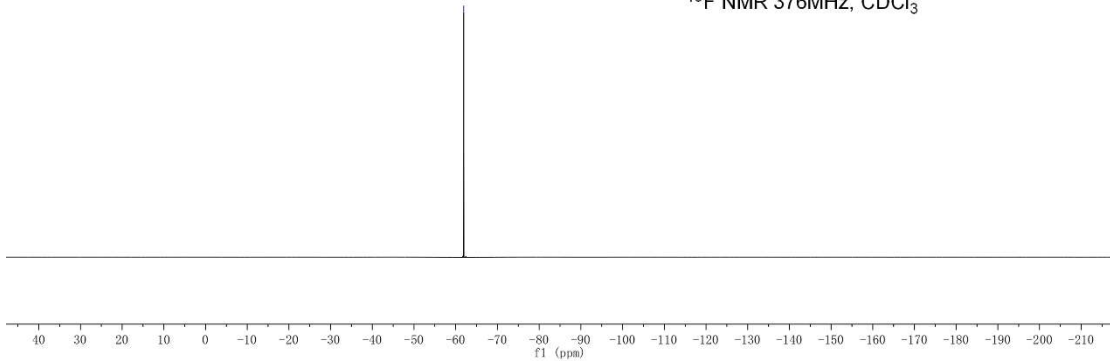

HRMS (ESI) copy of compound (*cis*)-**6b**:

### Mass Spectrum SmartFormula Report

#### Analysis Info

Analysis Name D:\Data\user\NWNU-fengyang 20230322-2.d  
Method tune\_low.m  
Sample Name A-381  
Comment

Acquisition Date 2023-3-22 9:16:53  
Operator BDAL@DE  
Instrument / Ser# micrOTOF-Q 20453

#### Acquisition Parameter

|             |          |                       |           |                  |           |
|-------------|----------|-----------------------|-----------|------------------|-----------|
| Source Type | ESI      | Ion Polarity          | Positive  | Set Nebulizer    | 0.4 Bar   |
| Focus       | Active   | Set Capillary         | 4500 V    | Set Dry Heater   | 180 j°C   |
| Scan Begin  | 50 m/z   | Set End Plate Offset  | -500 V    | Set Dry Gas      | 4.0 l/min |
| Scan End    | 1000 m/z | Set Collision Cell RF | 300.0 Vpp | Set Divert Valve | Waste     |

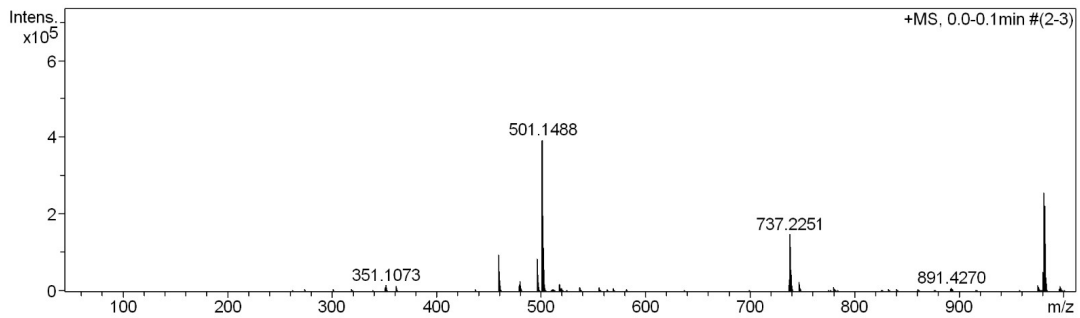

| Meas. #  | Formula                                                                          | m/z      | err [ppm] | Me an err [ppm] | rdb  | N- R ul e | e;≠ Conf | mS ig ma | Std l | Std Me an m/z | Std l Va r or m | Std m/z Diff | Std Com b Dev |
|----------|----------------------------------------------------------------------------------|----------|-----------|-----------------|------|-----------|----------|----------|-------|---------------|-----------------|--------------|---------------|
| 501.1488 | 1 C <sub>26</sub> H <sub>21</sub> F <sub>3</sub> N <sub>4</sub> NaO <sub>2</sub> | 501.1509 | 4.1       | 3.0             | 16.5 | ok        | even     | 3.4      | 5.0   | 1.8           | 2.2             | 2.4          | 842.7         |

NMR copies of compound (*trans*)-6c:

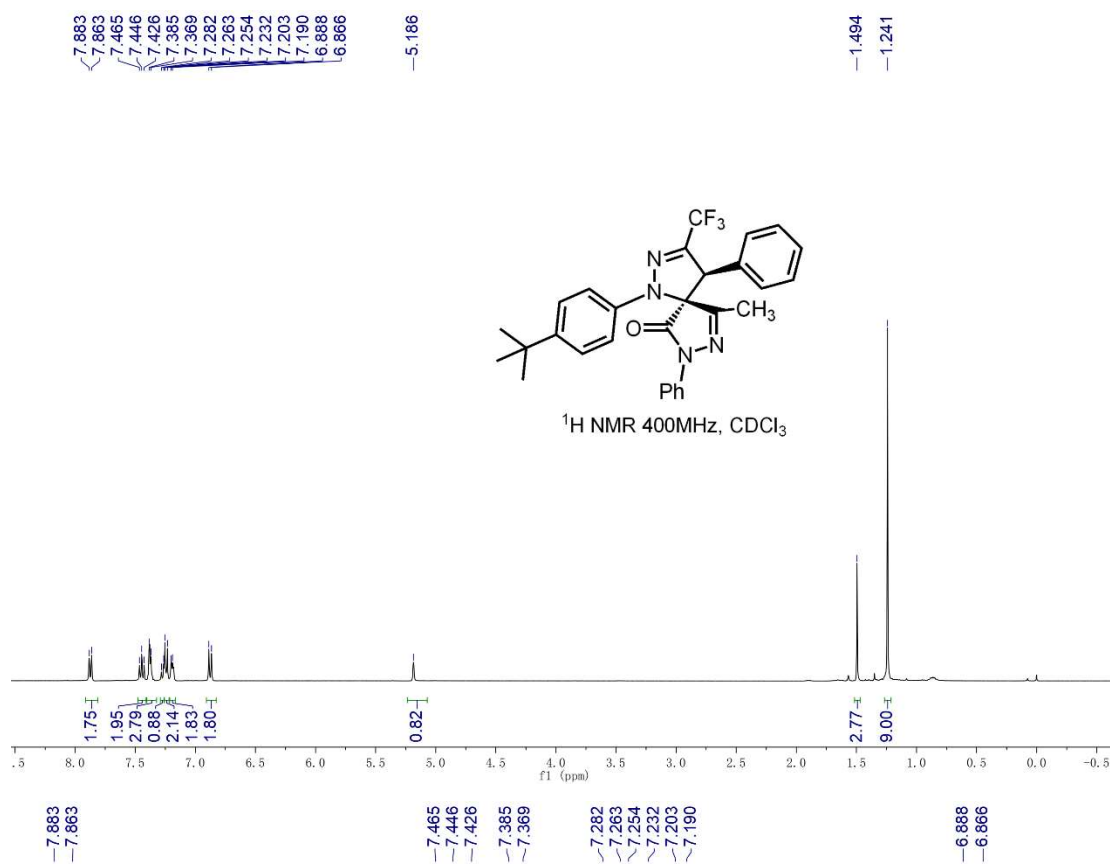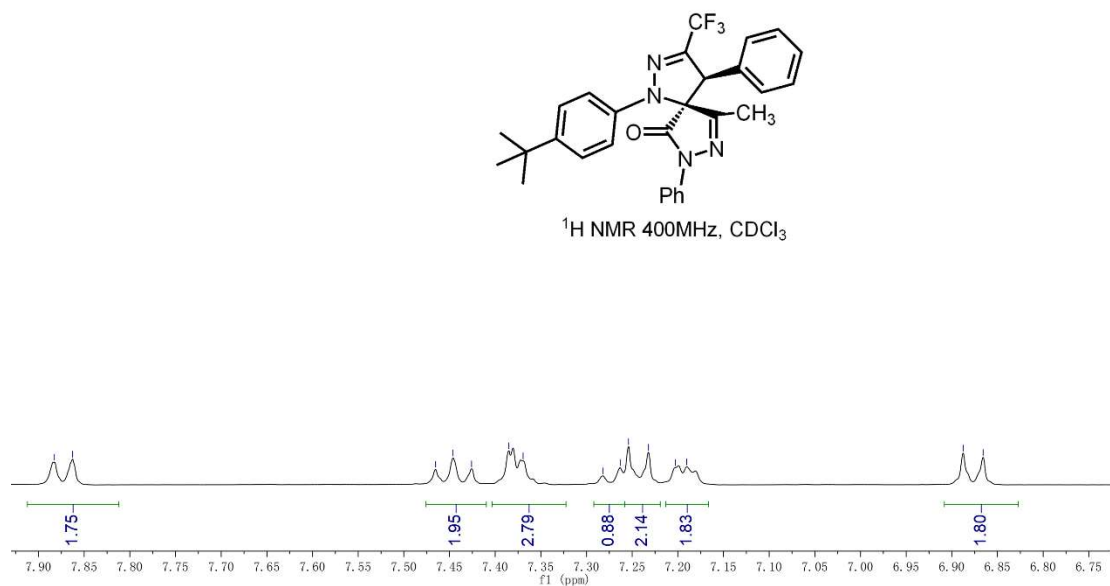

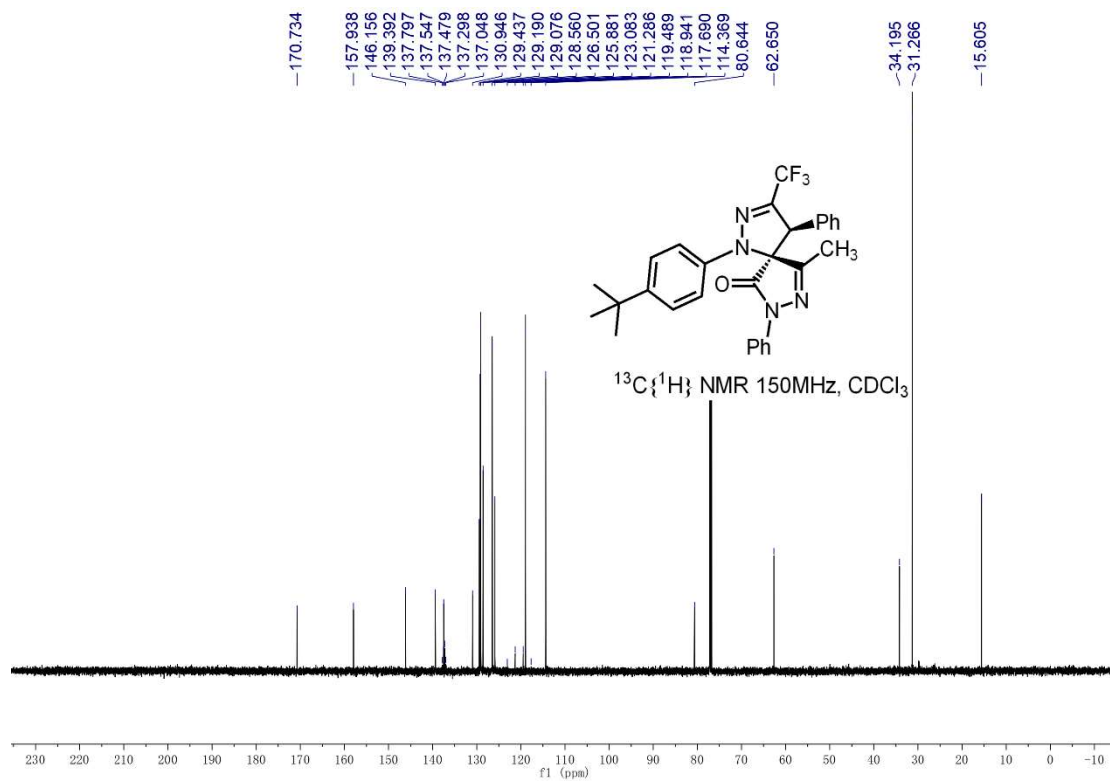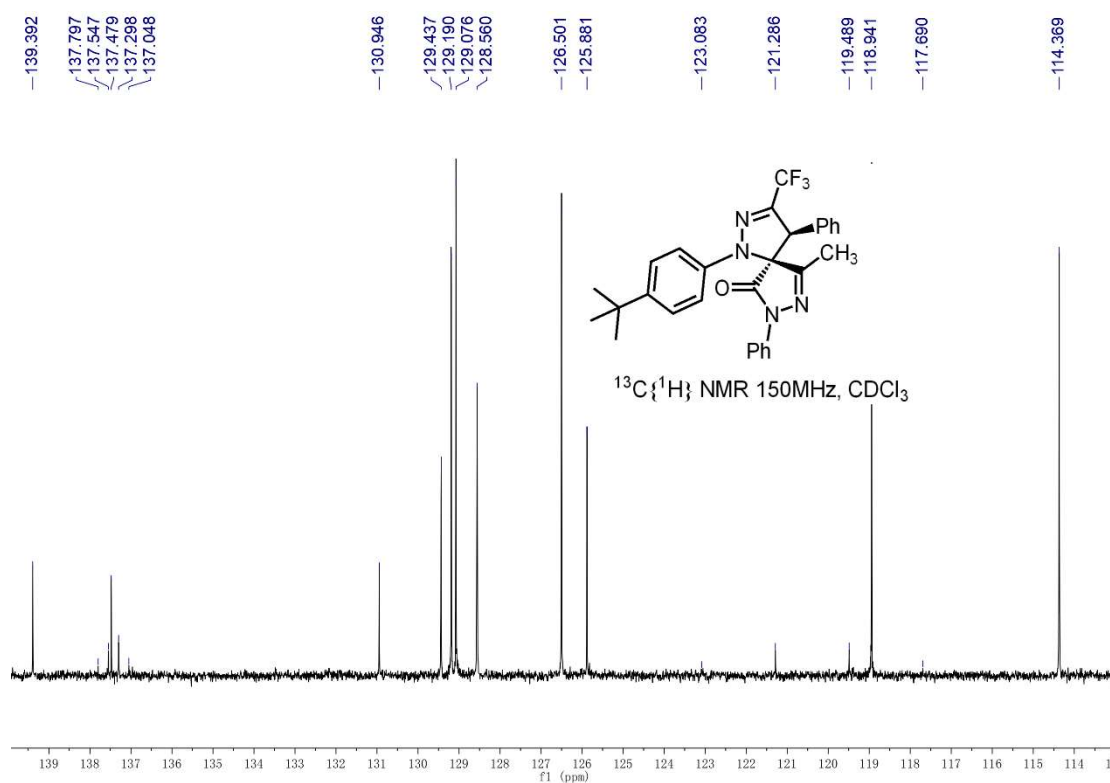

--61.555

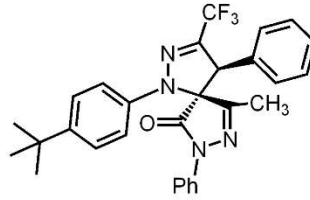

<sup>19</sup>F NMR 376MHz, CDCl<sub>3</sub>

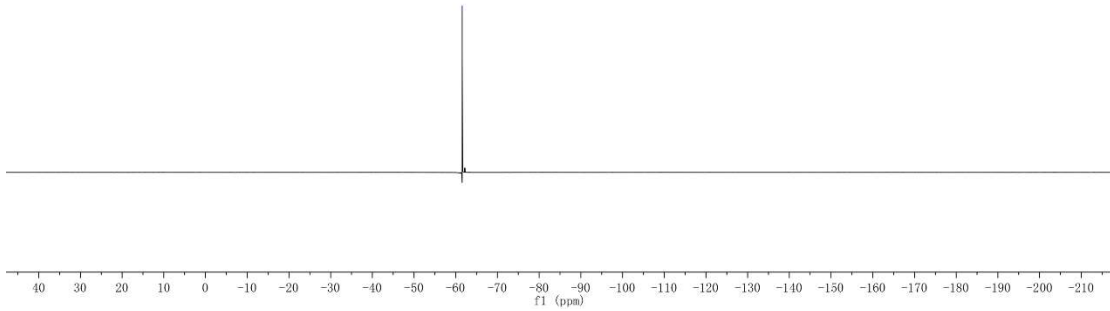

HRMS (ESI) copy of compound (*trans*)-6c:

### Mass Spectrum SmartFormula Report

#### Analysis Info

Analysis Name D:\Data\user\NWNW-fengyang 20230322-3.d  
Method tune\_low.m  
Sample Name A-39  
Comment

Acquisition Date 2023-3-22 9:20:19

Operator BDAL@DE  
Instrument / Ser# micrOTOF-Q 20453

#### Acquisition Parameter

|             |          |                       |           |                  |             |
|-------------|----------|-----------------------|-----------|------------------|-------------|
| Source Type | ESI      | Ion Polarity          | Positive  | Set Nebulizer    | 0.4 Bar     |
| Focus       | Active   | Set Capillary         | 4500 V    | Set Dry Heater   | 180 $\mu$ C |
| Scan Begin  | 50 m/z   | Set End Plate Offset  | -500 V    | Set Dry Gas      | 4.0 l/min   |
| Scan End    | 1000 m/z | Set Collision Cell RF | 400.0 Vpp | Set Divert Valve | Waste       |

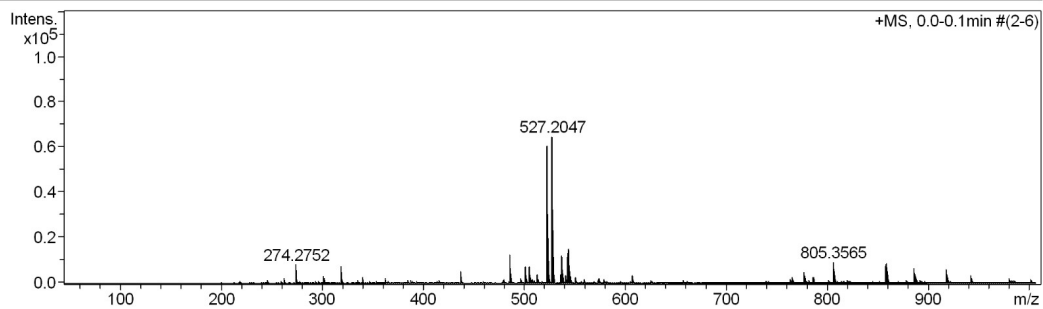

| Meas. #  | Formula                                                             | m/z      | err [ppm] | Mean err [ppm] | rdB  | N-R | ej $\neq$ Conf | mSi gm | Std l | Std d l | Std d l  | Std d l   | Std Com b |
|----------|---------------------------------------------------------------------|----------|-----------|----------------|------|-----|----------------|--------|-------|---------|----------|-----------|-----------|
| m/z      |                                                                     |          |           |                |      |     |                |        |       | Me an z | Val rN z | m/ or Dif | Dev       |
| 527.2047 | 1 C <sub>29</sub> H <sub>27</sub> F <sub>3</sub> N <sub>4</sub> NaO | 527.2029 | -3.4      | -3.0           | 16.5 | ok  | even           | 16.7   | 25.7  | 1.6     | 8.3      | 1.4       | 842.7     |

NMR copies of compound (*cis*)-**6c**:

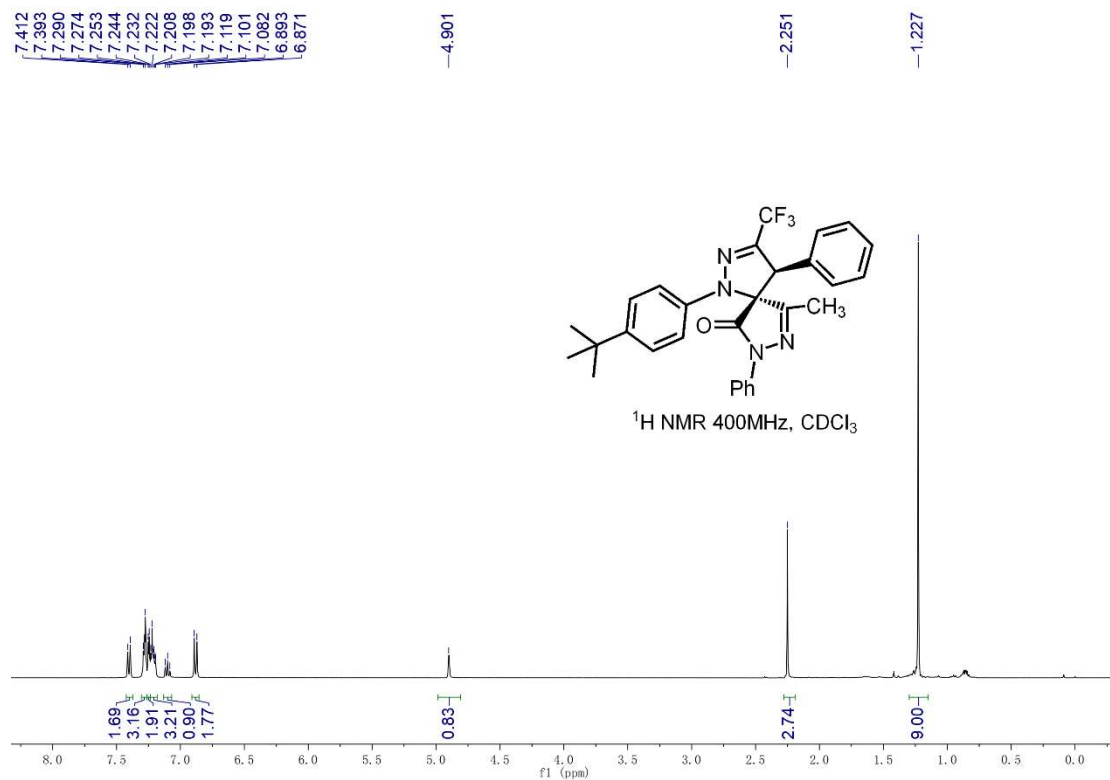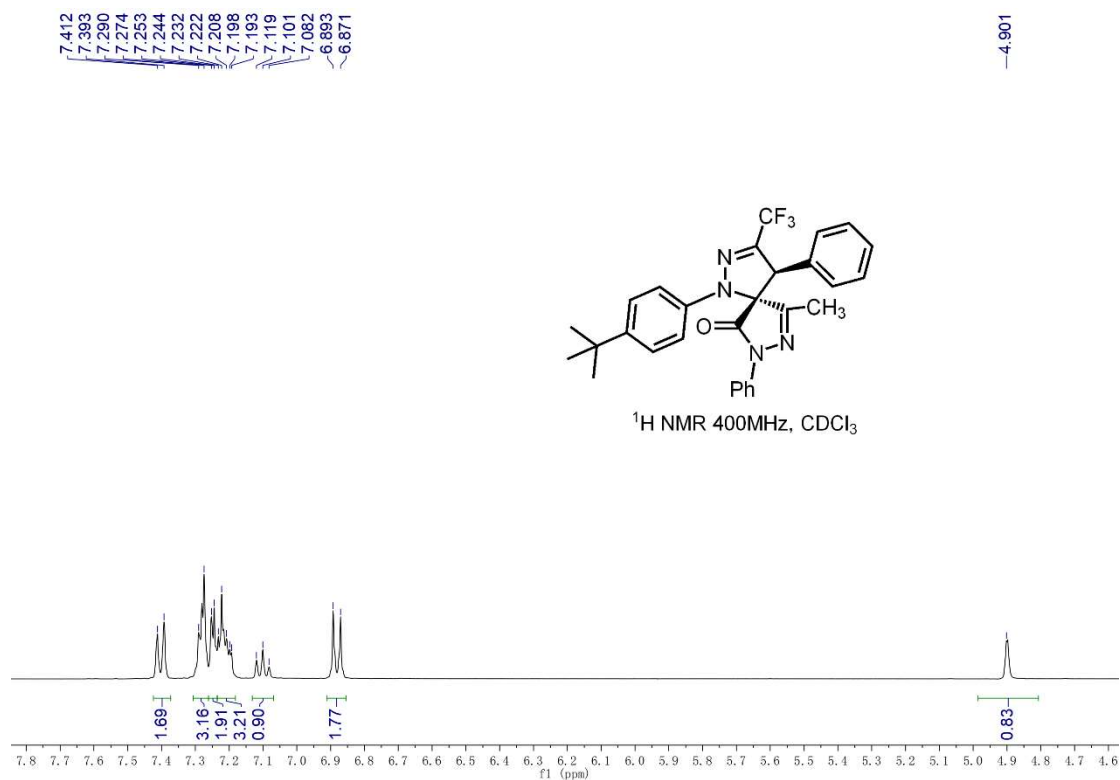

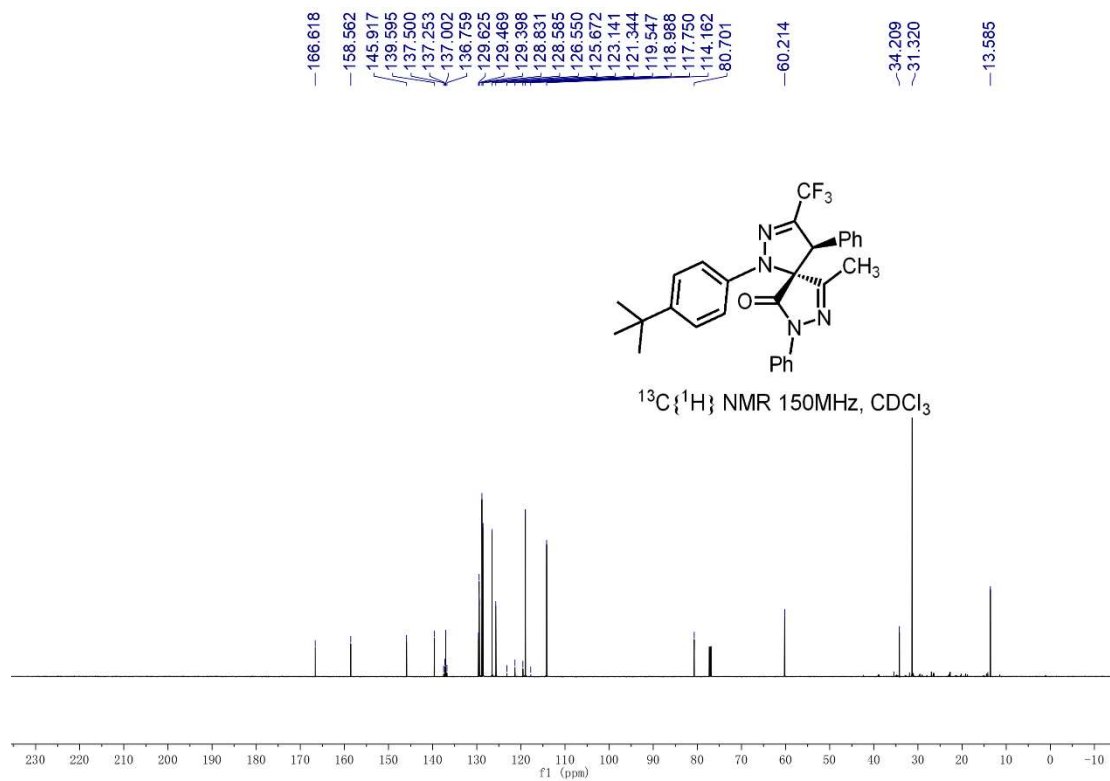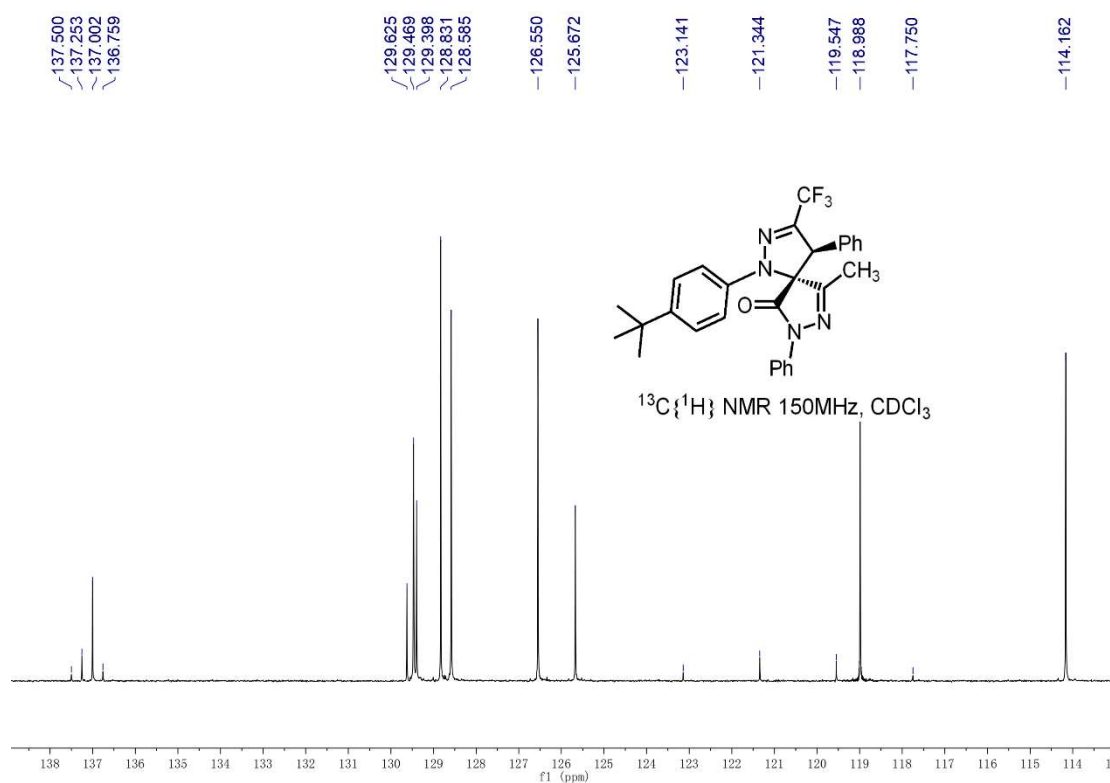



61.887

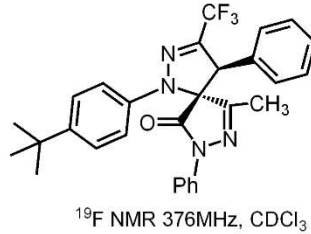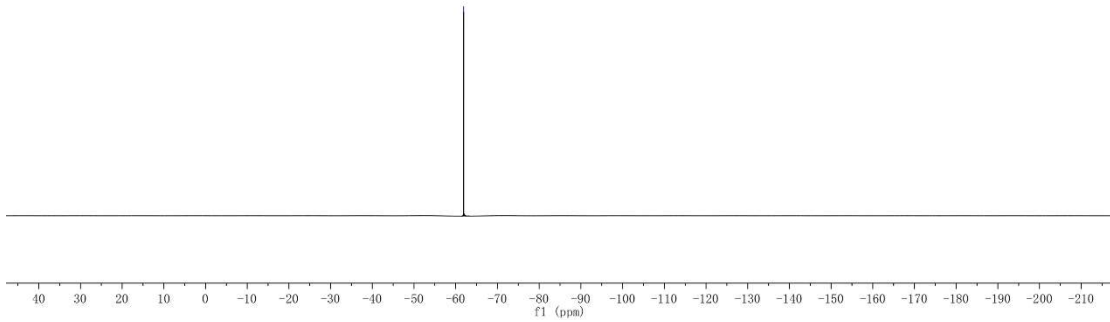

HRMS (ESI) copy of compound (*cis*)-6c:

### Mass Spectrum SmartFormula Report

#### Analysis Info

Analysis Name D:\Data\user\NWNNU-fengyang 20230322-4.d  
Method tune\_low.m  
Sample Name A-391  
Comment

Acquisition Date 2023-3-22 9:22:37  
Operator BDAL@DE  
Instrument / Ser# micrOTOF-Q 20453

#### Acquisition Parameter

|             |          |                       |           |                  |           |
|-------------|----------|-----------------------|-----------|------------------|-----------|
| Source Type | ESI      | Ion Polarity          | Positive  | Set Nebulizer    | 0.4 Bar   |
| Focus       | Active   | Set Capillary         | 4500 V    | Set Dry Heater   | 180 j°C   |
| Scan Begin  | 50 m/z   | Set End Plate Offset  | -500 V    | Set Dry Gas      | 4.0 l/min |
| Scan End    | 1000 m/z | Set Collision Cell RF | 400.0 Vpp | Set Divert Valve | Waste     |

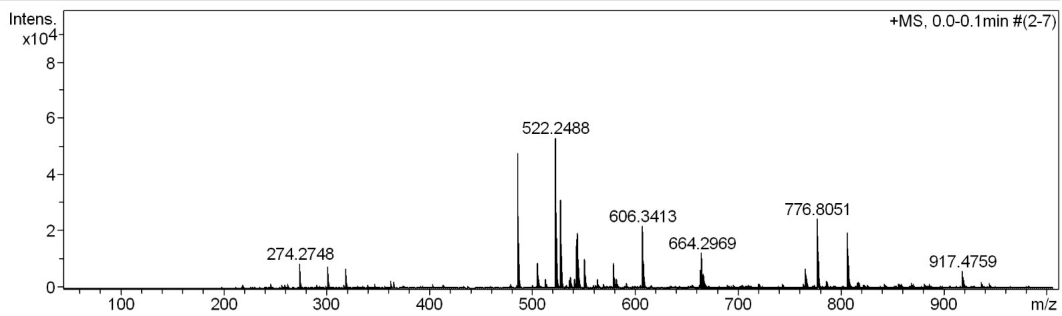

| Meas. #  | Formula                                                             | m/z      | err [ppm] | Me an err [ppm] | rdb  | N-R | e <sub>i</sub> ≠ Conf | mSi gm | Std l | St d Me an m/z | St d l Va rN or m/z | St d m/ Dif z m f | Std Com b Dev |
|----------|---------------------------------------------------------------------|----------|-----------|-----------------|------|-----|-----------------------|--------|-------|----------------|---------------------|-------------------|---------------|
| 527.2041 | 1 C <sub>29</sub> H <sub>27</sub> F <sub>3</sub> N <sub>4</sub> NaO | 527.2029 | -2.3      | -1.9            | 16.5 | ok  | even                  | 18.4   | 28.2  | 1.1            | 9.0                 | 0.6               | 842.7         |

NMR copies of compound (*trans*)-6d:

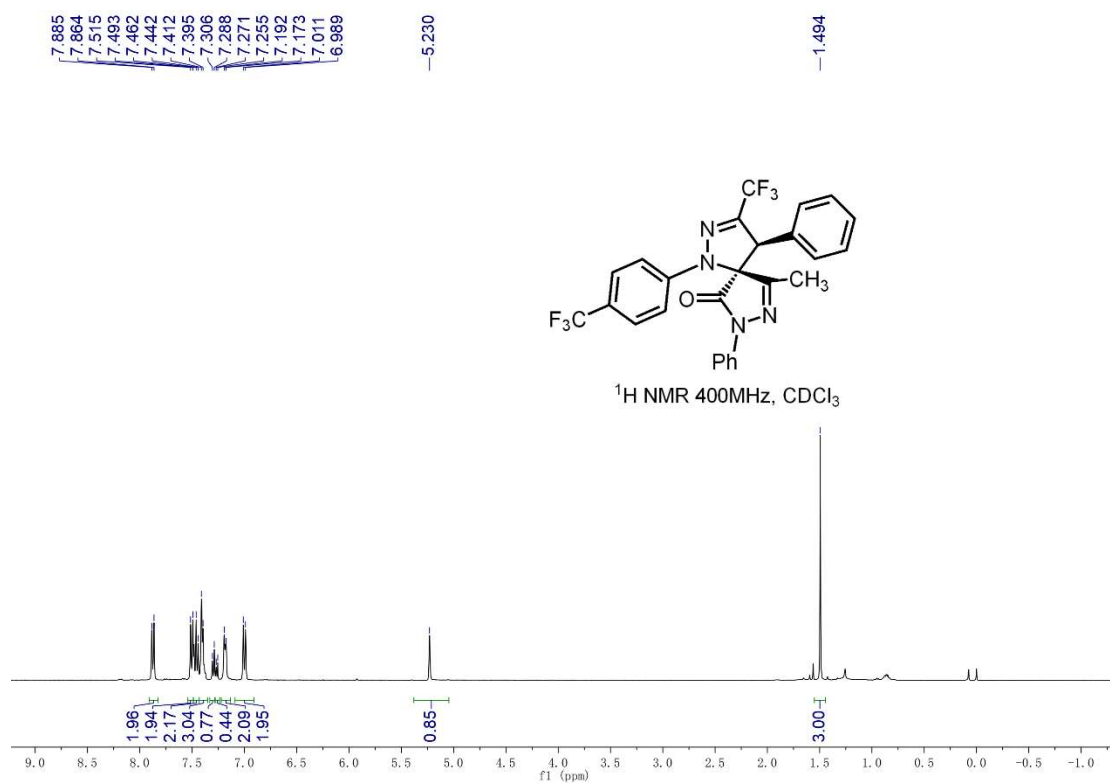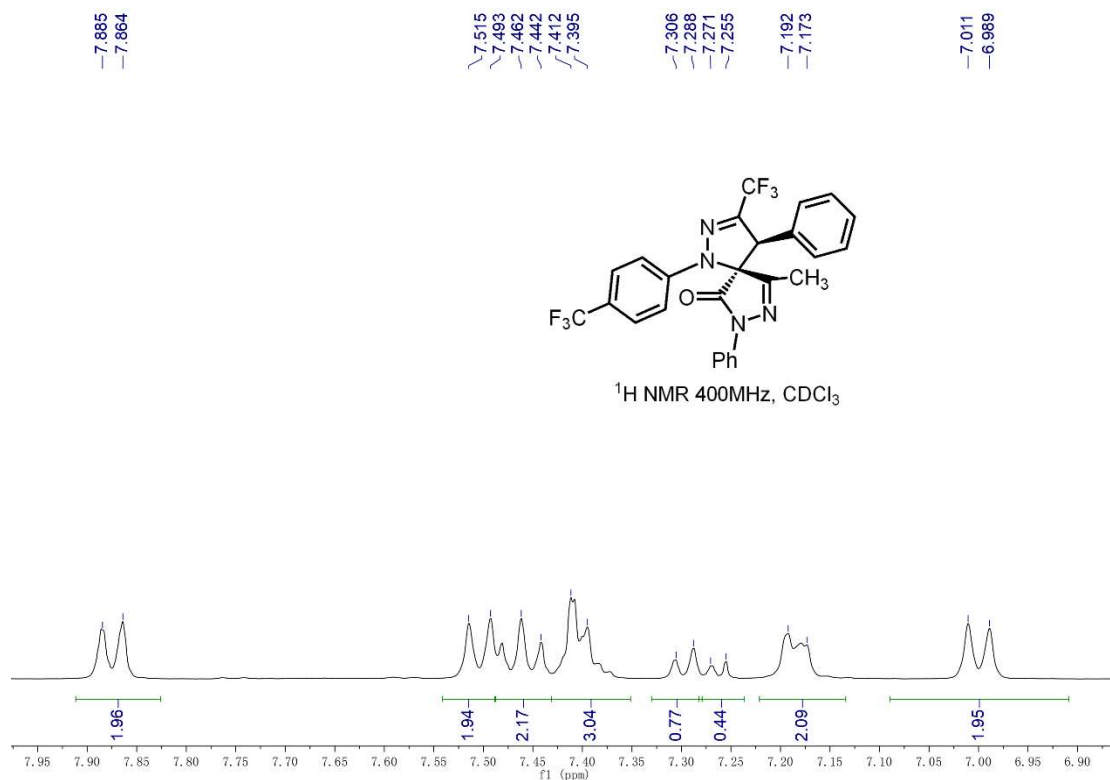

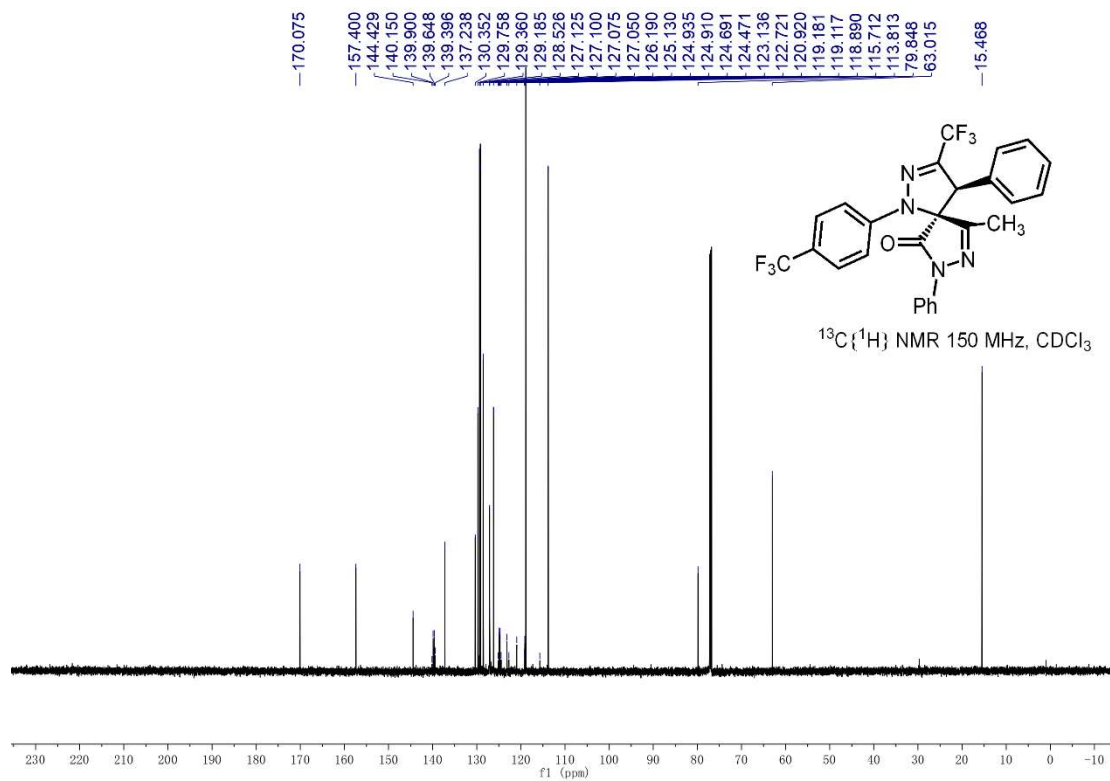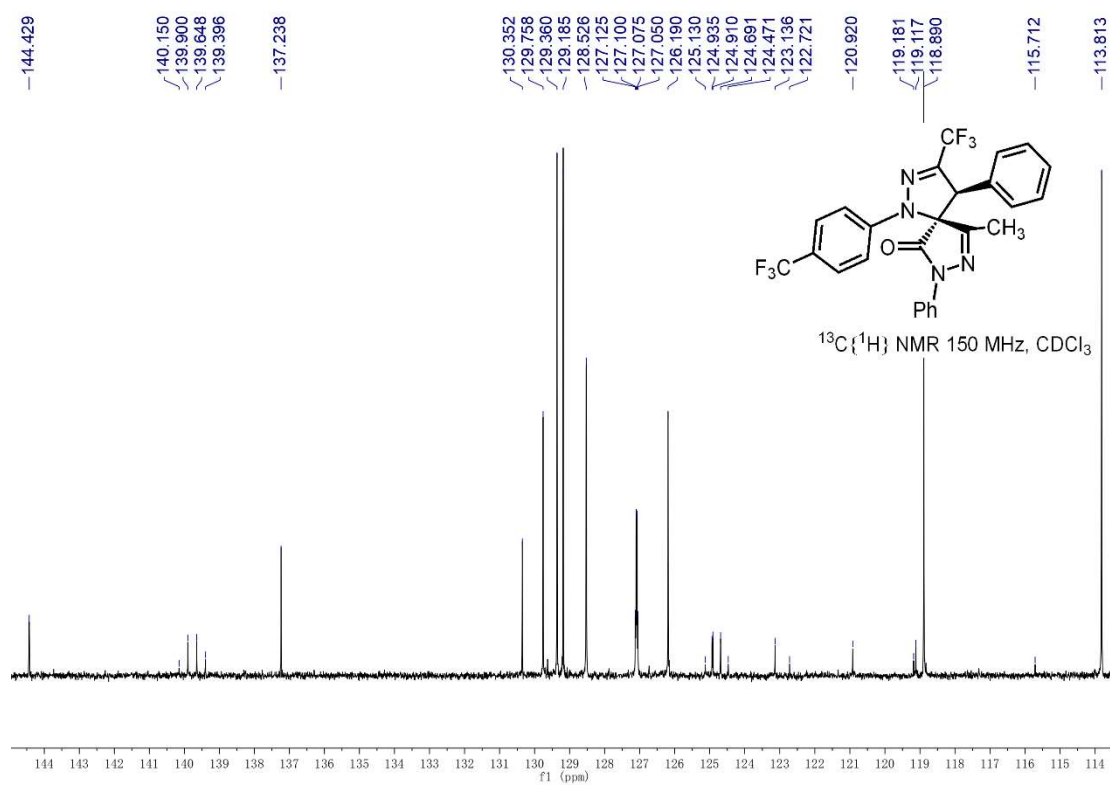

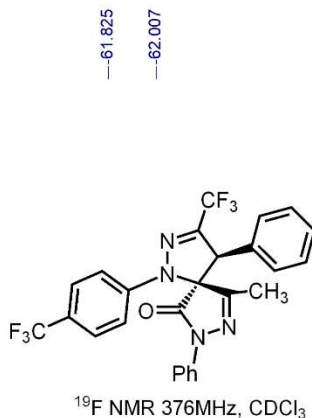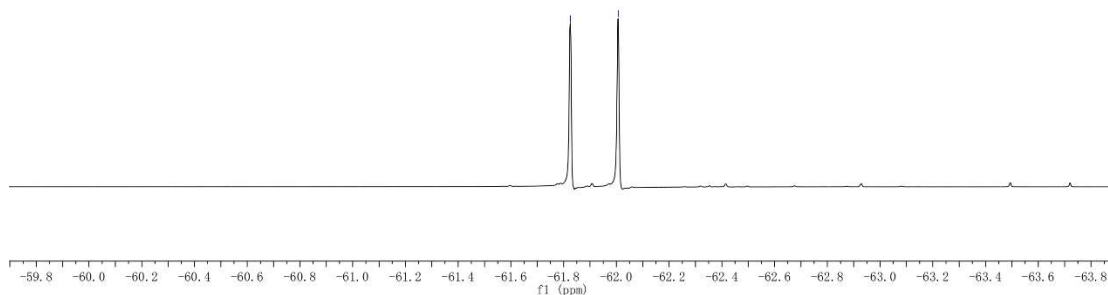

HRMS (ESI) copy of compound (*trans*)-6d:

### Mass Spectrum SmartFormula Report

**Analysis Info**

Analysis Name D:\Data\user\NWNNU-fengyang 20230322-5.d  
 Method tune\_low.m  
 Sample Name A-41  
 Comment

Acquisition Date 2023-3-22 9:25:35

Operator BDAL@DE  
 Instrument / Ser# micrOTOF-Q 20453

**Acquisition Parameter**

|             |          |                       |           |                  |           |
|-------------|----------|-----------------------|-----------|------------------|-----------|
| Source Type | ESI      | Ion Polarity          | Positive  | Set Nebulizer    | 0.4 Bar   |
| Focus       | Active   | Set Capillary         | 4500 V    | Set Dry Heater   | 180 j°C   |
| Scan Begin  | 50 m/z   | Set End Plate Offset  | -500 V    | Set Dry Gas      | 4.0 l/min |
| Scan End    | 1000 m/z | Set Collision Cell RF | 400.0 Vpp | Set Divert Valve | Waste     |

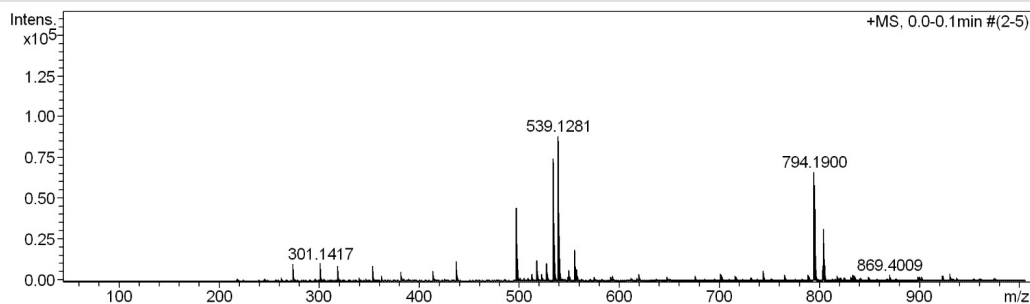

| Meas. #  | Formula                                                           | m/z      | err [ppm] | Mass error [ppm] | rdB  | N-R | ej%  | mSi  | Std  | St  | Std  | St  | Std   |
|----------|-------------------------------------------------------------------|----------|-----------|------------------|------|-----|------|------|------|-----|------|-----|-------|
| m/z      |                                                                   |          |           |                  |      | ul  | Con  | gm   | l    | d   | l    | d   | Com   |
|          |                                                                   |          |           |                  |      | e   |      | a    |      | Me  | Var  | m/  | z     |
|          |                                                                   |          |           |                  |      |     |      |      |      | an  | Nor  | m/  | Dif   |
|          |                                                                   |          |           |                  |      |     |      |      |      | z   | m    | f   | Dev   |
| 539.1281 | C <sub>26</sub> H <sub>18</sub> F <sub>6</sub> N <sub>4</sub> NaO | 539.1277 | -0.8      | -0.5             | 16.5 | ok  | even | 13.9 | 21.8 | 0.4 | 10.0 | 0.3 | 842.7 |

NMR copies of compound (*cis*)-**6d**:

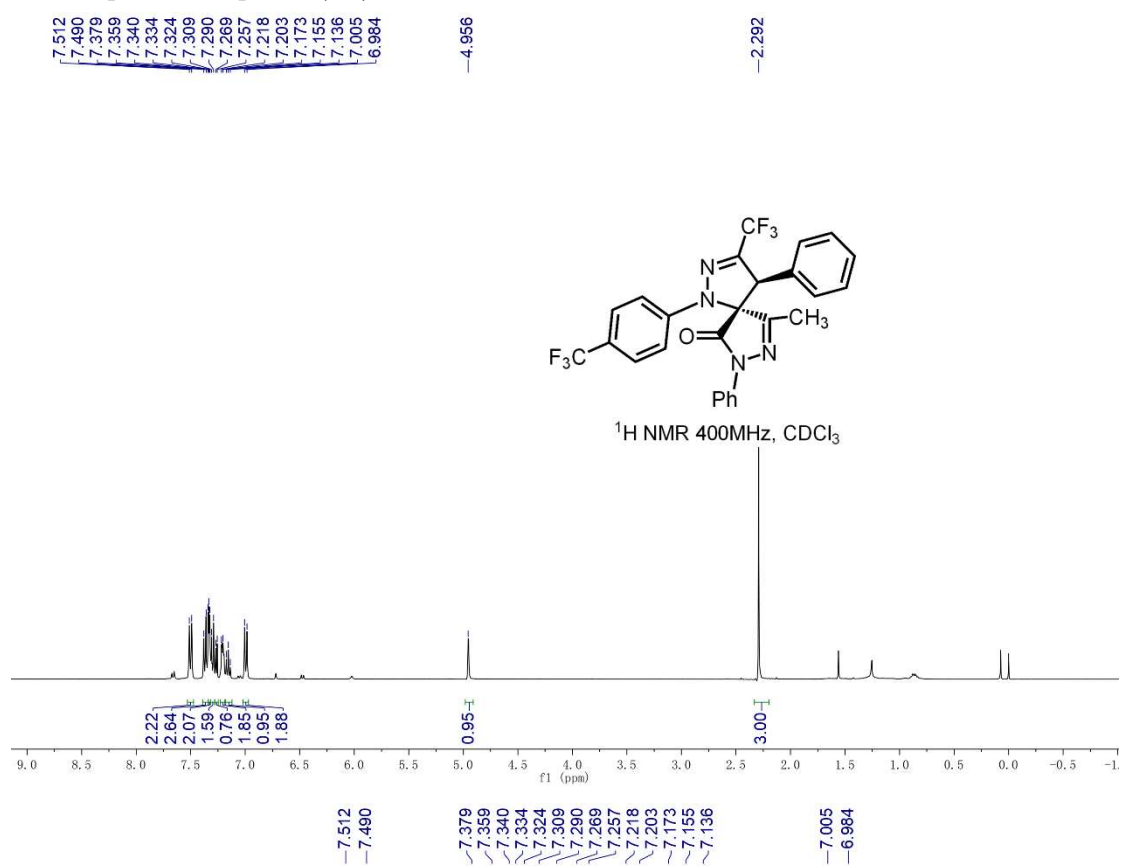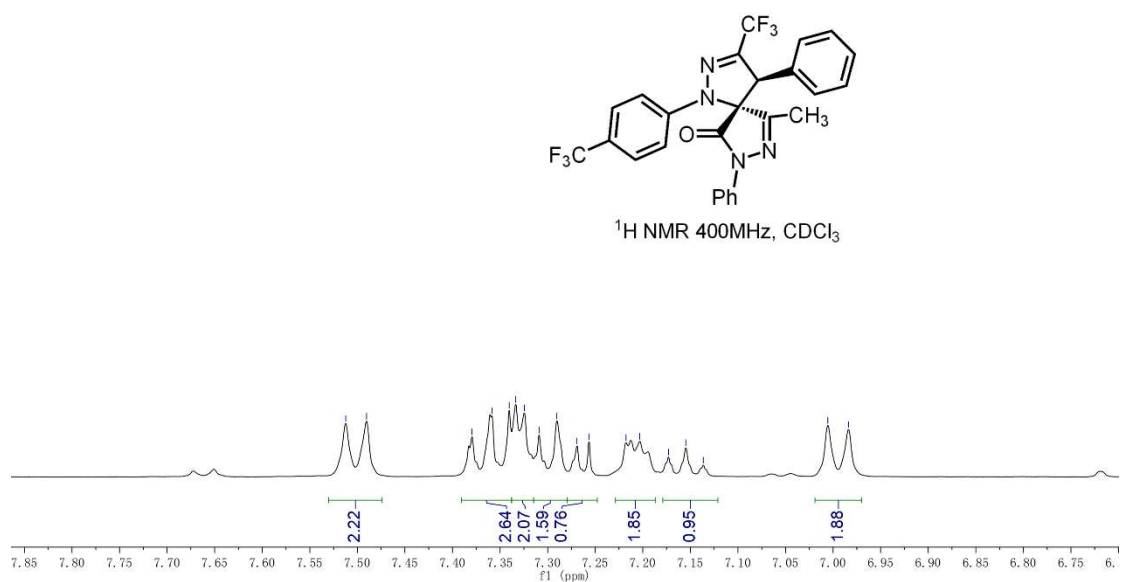

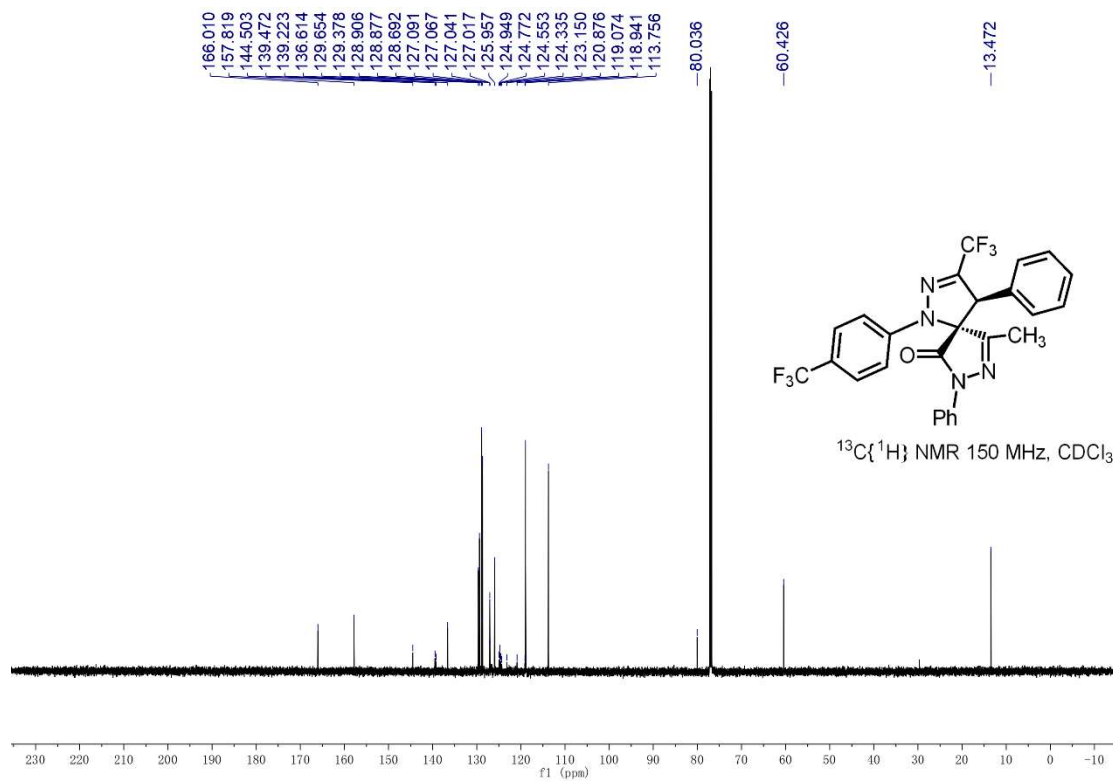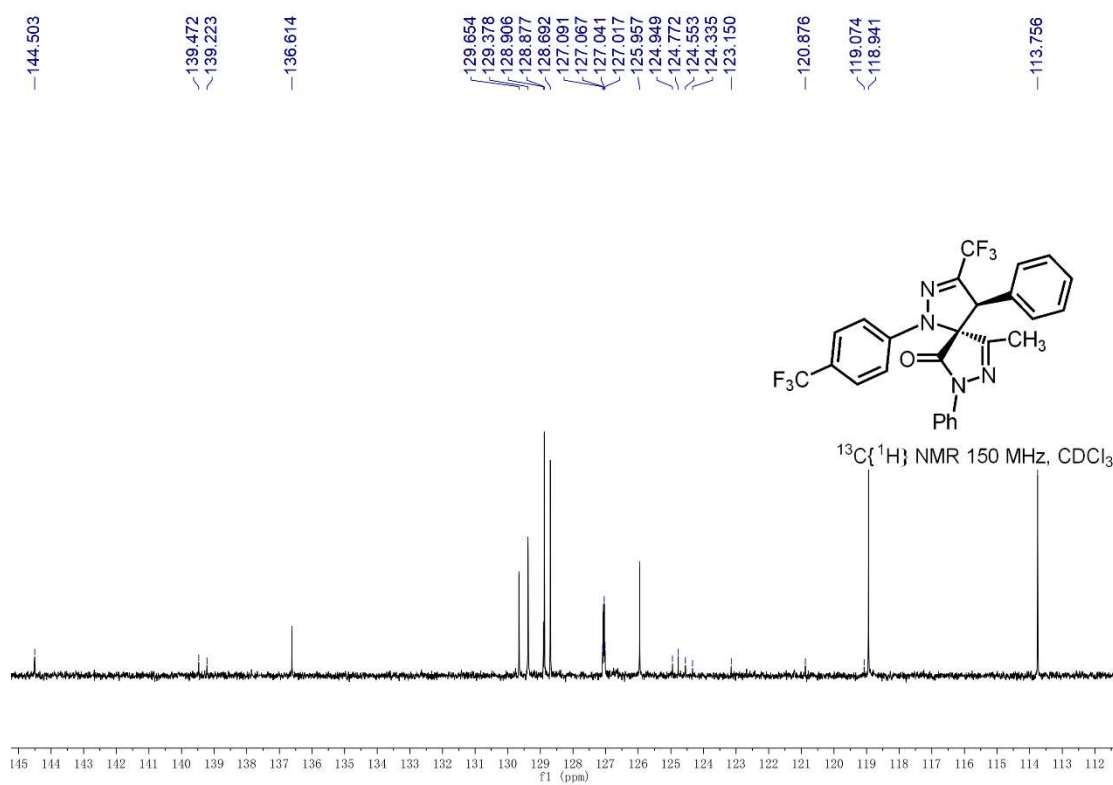

61.988  
62.230

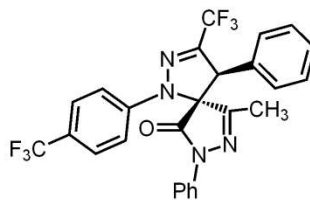

<sup>19</sup>F NMR 376MHz, CDCl<sub>3</sub>

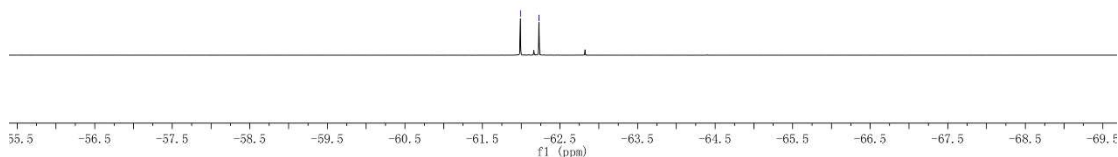

HRMS (ESI) copy of compound (*cis*)-6d:

### Mass Spectrum SmartFormula Report

#### Analysis Info

Analysis Name D:\Data\user\NWNNU-fengyang 20230322-6.d  
Method tune\_low.m  
Sample Name A-411  
Comment

Acquisition Date 2023-3-22 9:27:42  
Operator BDAL@DE  
Instrument / Ser# micrOTOF-Q 20453

#### Acquisition Parameter

|             |          |                       |           |                  |           |
|-------------|----------|-----------------------|-----------|------------------|-----------|
| Source Type | ESI      | Ion Polarity          | Positive  | Set Nebulizer    | 0.4 Bar   |
| Focus       | Active   | Set Capillary         | 4500 V    | Set Dry Heater   | 180 j°C   |
| Scan Begin  | 50 m/z   | Set End Plate Offset  | -500 V    | Set Dry Gas      | 4.0 l/min |
| Scan End    | 1000 m/z | Set Collision Cell RF | 400.0 Vpp | Set Divert Valve | Waste     |

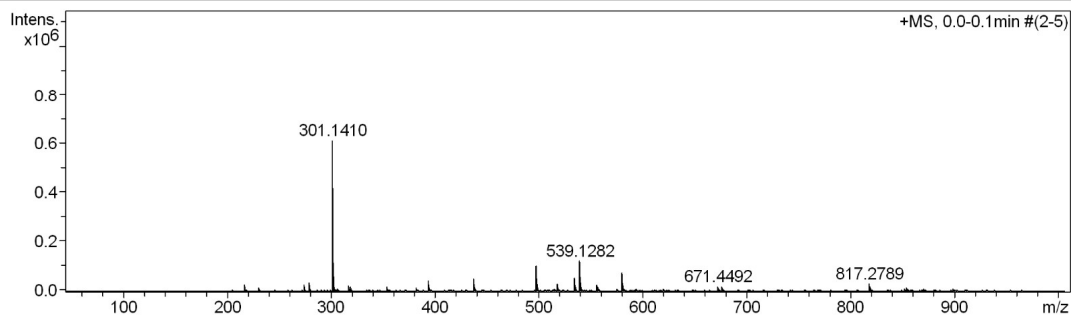

| Meas. #  | Formula                                                             | m/z      | err [ppm] | Me an err [ppm] | rdb  | N- R | e; % Conf | m Sigma | Std l | St d Me an z m | St d l rN or z m | St d m/ Dif f | Std Com b Dev |
|----------|---------------------------------------------------------------------|----------|-----------|-----------------|------|------|-----------|---------|-------|----------------|------------------|---------------|---------------|
| 539.1282 | 1 C <sub>26</sub> H <sub>18</sub> F <sub>6</sub> N <sub>4</sub> NaO | 539.1277 | -0.9      | -1.1            | 16.5 | ok   | even      | 7.0     | 11.9  | 0.6            | 6.8              | 0.4           | 842.7         |

NMR copies of compound (*trans*)-6e:

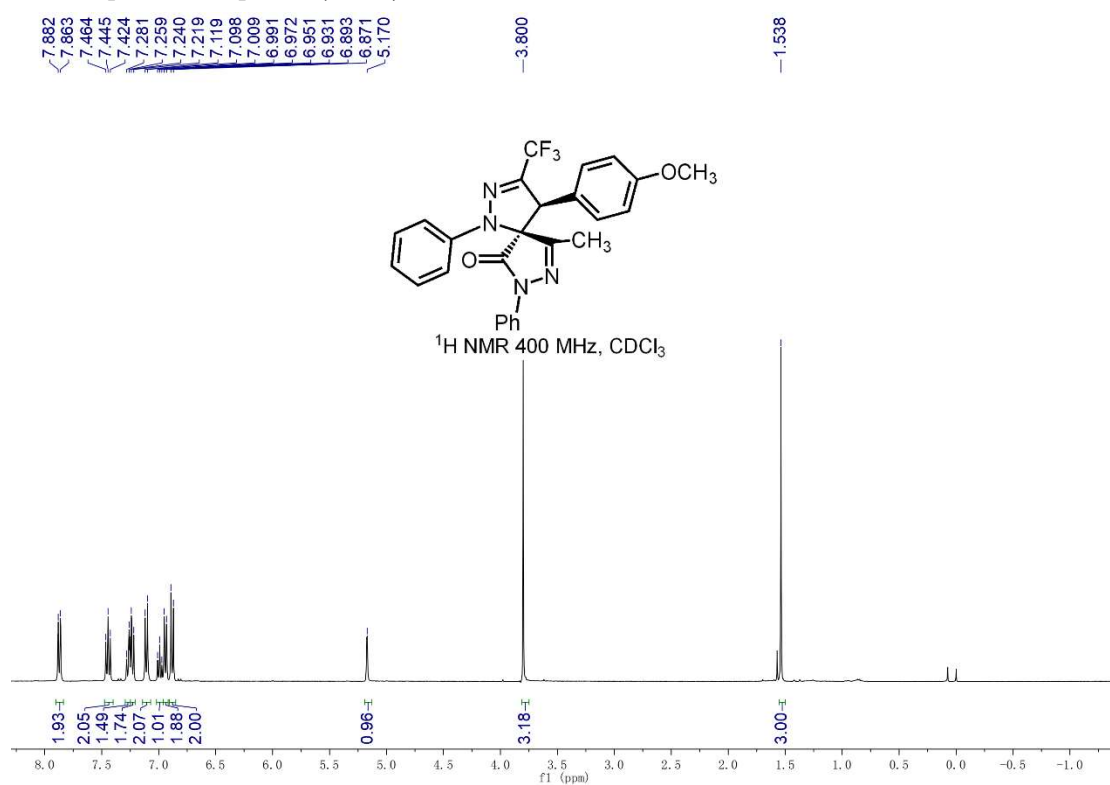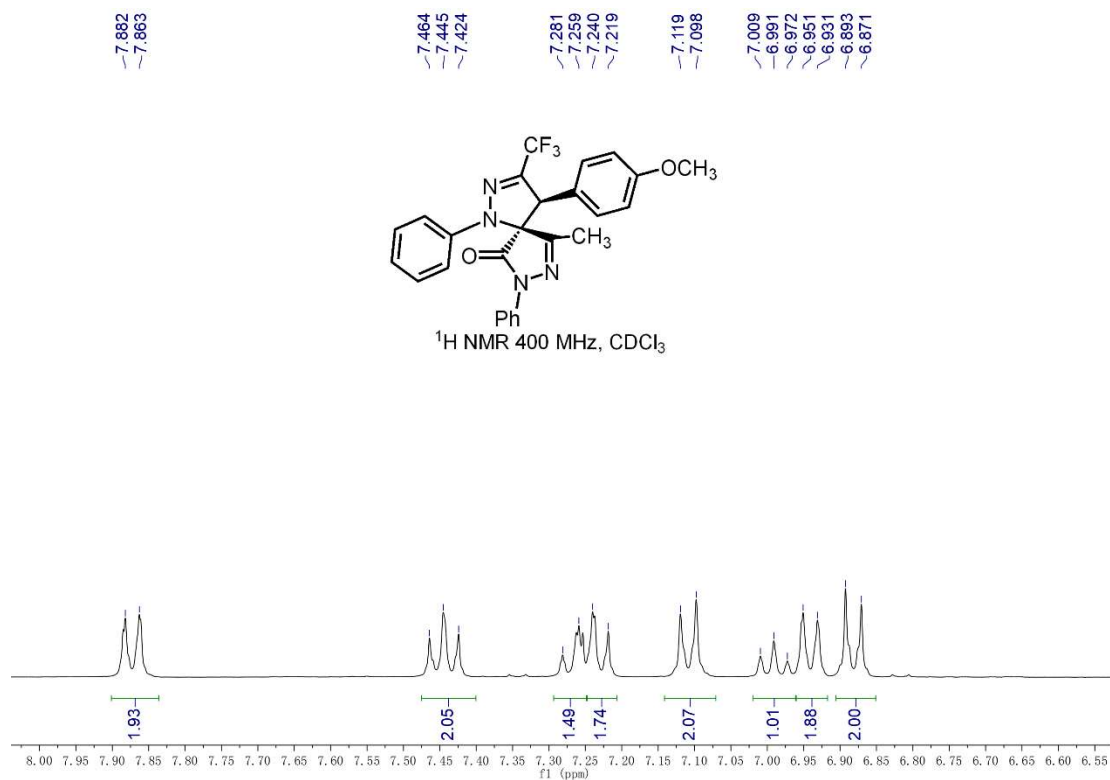



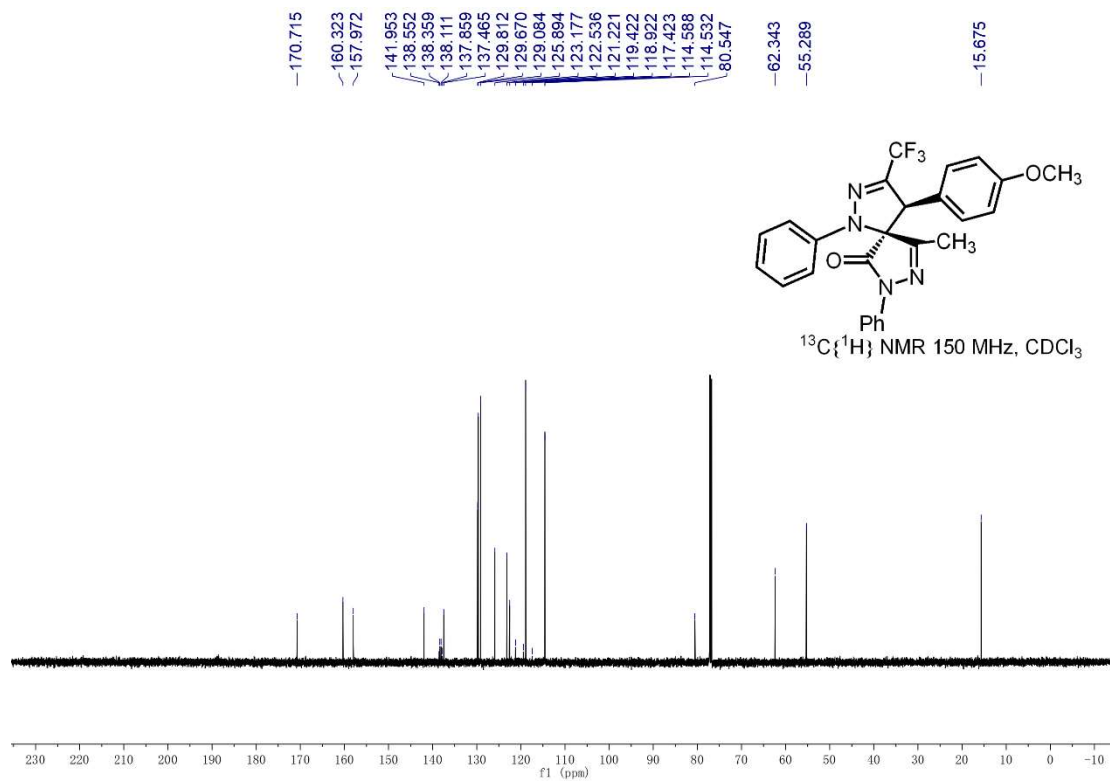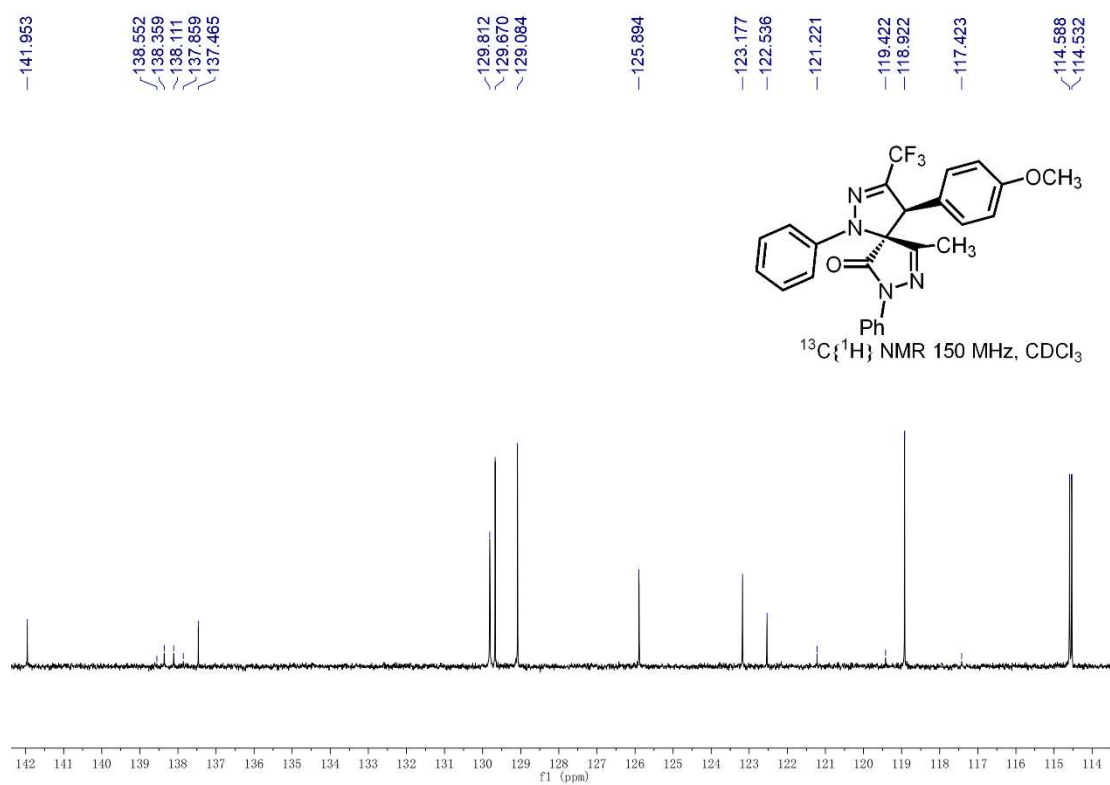

61.679

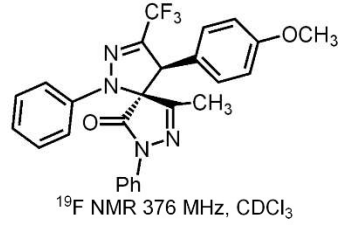

HRMS (ESI) copy of compound (*trans*)-6e:

### Mass Spectrum SmartFormula Report

#### Analysis Info

Analysis Name D:\Data\user\NWNNU-fengyang 20230322--7.d  
Method tune\_low.m  
Sample Name A-42  
Comment

Acquisition Date 2023-3-22 9:31:12

Operator BDAL@DE  
Instrument / Ser# micrOTOF-Q 20453

#### Acquisition Parameter

|             |          |                       |           |                  |           |
|-------------|----------|-----------------------|-----------|------------------|-----------|
| Source Type | ESI      | Ion Polarity          | Positive  | Set Nebulizer    | 0.4 Bar   |
| Focus       | Active   | Set Capillary         | 4500 V    | Set Dry Heater   | 180 j°C   |
| Scan Begin  | 50 m/z   | Set End Plate Offset  | -500 V    | Set Dry Gas      | 4.0 l/min |
| Scan End    | 1000 m/z | Set Collision Cell RF | 400.0 Vpp | Set Divert Valve | Waste     |

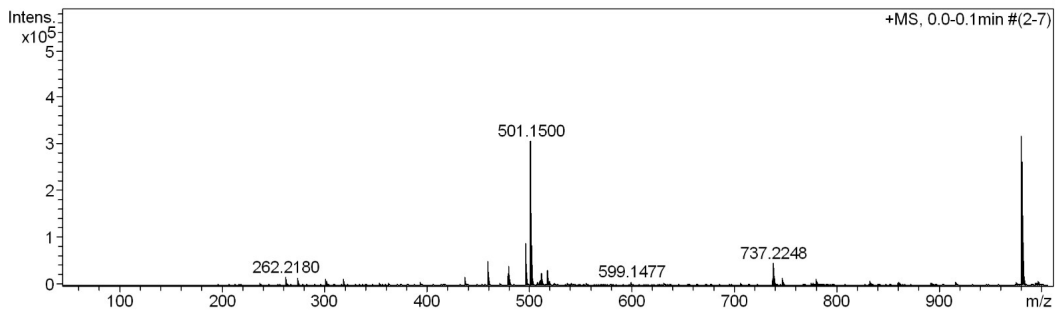

| Meas. #  | Formula                                                                          | m/z      | err [ppm] | Me an err [ppm] | rdb  | N-R | e j % Conf | mSi gm a | Std l | St d Me an z | St d l Va rN z m f | St d m/ Dif | Std Com b Dev |
|----------|----------------------------------------------------------------------------------|----------|-----------|-----------------|------|-----|------------|----------|-------|--------------|--------------------|-------------|---------------|
| 501.1500 | 1 C <sub>26</sub> H <sub>21</sub> F <sub>3</sub> N <sub>4</sub> NaO <sub>2</sub> | 501.1509 | 1.8       | 1.1             | 16.5 | ok  | even       | 12.5     | 18.4  | 0.8          | 7.9                | 1.4         | 842.7         |

NMR copies of compound (*cis*)-**6e**:

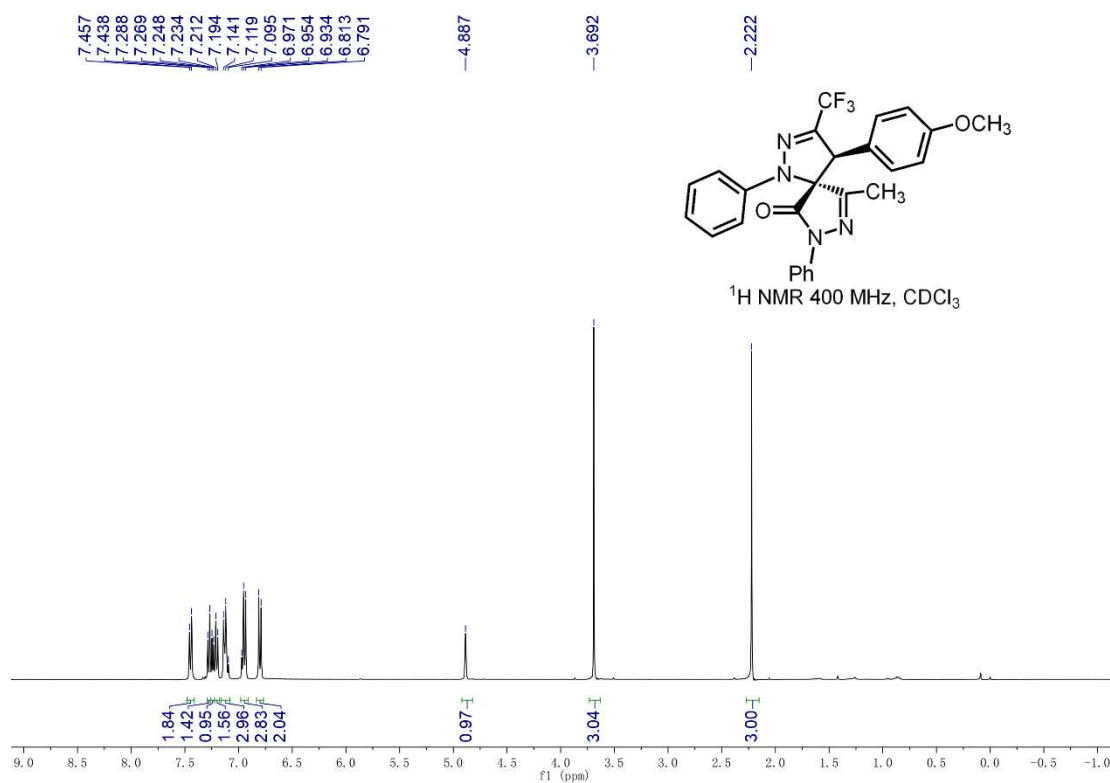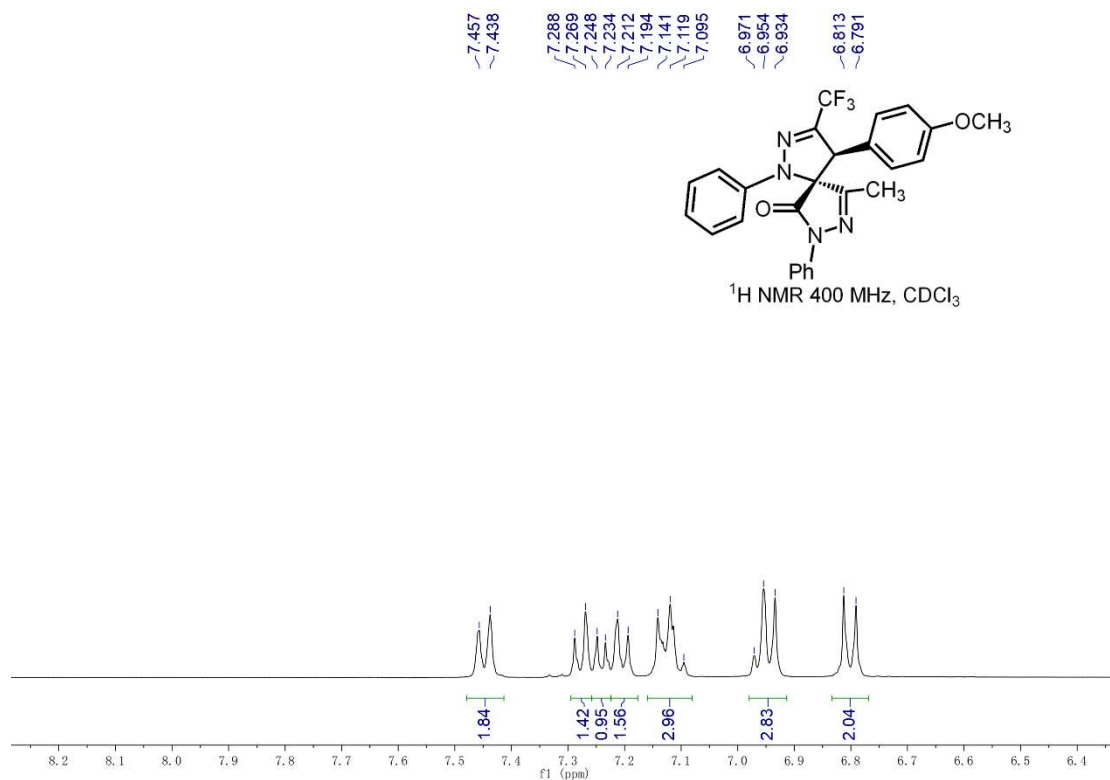

166.649  
 160.337  
 158.560  
 142.175  
 138.414  
 138.168  
 137.922  
 137.676  
 137.023  
 130.759  
 129.691  
 128.848  
 125.700  
 123.027  
 121.290  
 121.248  
 119.450  
 119.006  
 117.653  
 114.454  
 114.012  
 80.557

59.761  
 55.191

13.540

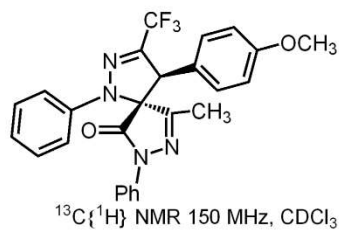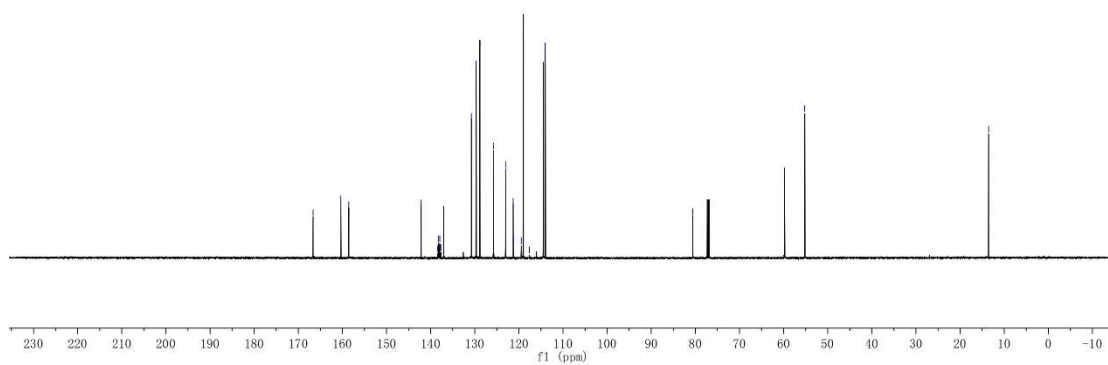

138.414  
 138.168  
 137.922  
 137.676  
 137.023

130.759  
 129.691  
 128.848

125.700

123.027

121.290  
 121.248

119.450  
 119.006

117.653

114.454  
 114.012

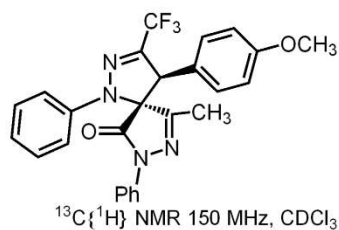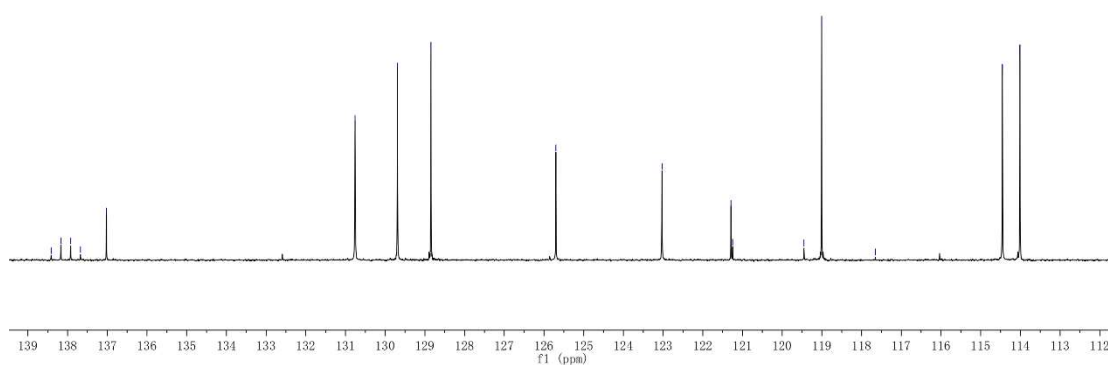

-62.083

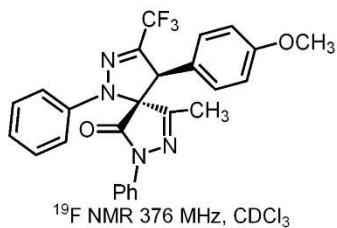

HRMS (ESI) copy of compound (*cis*)-6e:

### Mass Spectrum SmartFormula Report

#### Analysis Info

Analysis Name D:\Data\user\NWNW-fengyang 20230322-8.d  
Method tune\_low.m  
Sample Name A-421  
Comment

Acquisition Date 2023-3-22 9:33:02

Operator BDAL@DE  
Instrument / Ser# micrOTOF-Q 20453

#### Acquisition Parameter

|             |          |                       |           |                  |                   |
|-------------|----------|-----------------------|-----------|------------------|-------------------|
| Source Type | ESI      | Ion Polarity          | Positive  | Set Nebulizer    | 0.4 Bar           |
| Focus       | Active   | Set Capillary         | 4500 V    | Set Dry Heater   | 180 $\mu\text{C}$ |
| Scan Begin  | 50 m/z   | Set End Plate Offset  | -500 V    | Set Dry Gas      | 4.0 l/min         |
| Scan End    | 1000 m/z | Set Collision Cell RF | 400.0 Vpp | Set Divert Valve | Waste             |

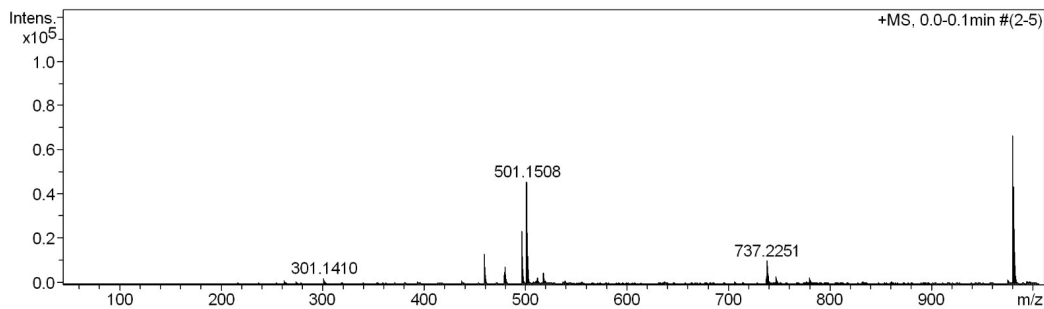

| Meas. #  | Formula                                                                          | m/z      | err [ppm] | Me an [ppm] | rdb  | N- ul e | e j % Con f | mSi gm a | Std l | St d | St d l | St d | Std Com b |
|----------|----------------------------------------------------------------------------------|----------|-----------|-------------|------|---------|-------------|----------|-------|------|--------|------|-----------|
| 501.1508 | 1 C <sub>26</sub> H <sub>21</sub> F <sub>3</sub> N <sub>4</sub> NaO <sub>2</sub> | 501.1509 | 0.3       | -0.2        | 16.5 | ok      | even        | 14.9     | 21.9  | 0.5  | 9.4    | 1.2  | 842.7     |

NMR copies of compound (*trans*)-6f:

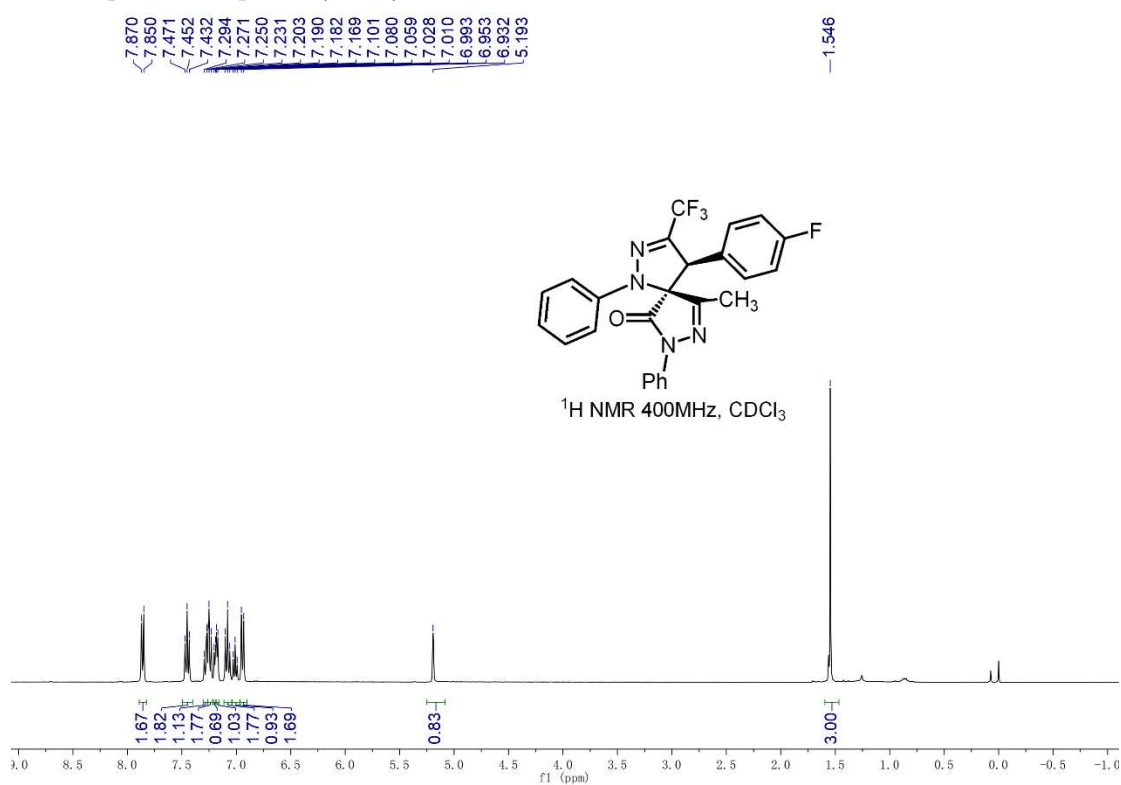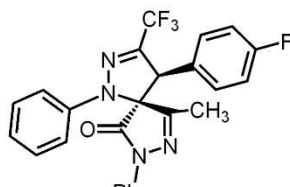

<sup>1</sup>H NMR 400MHz, CDCl<sub>3</sub>

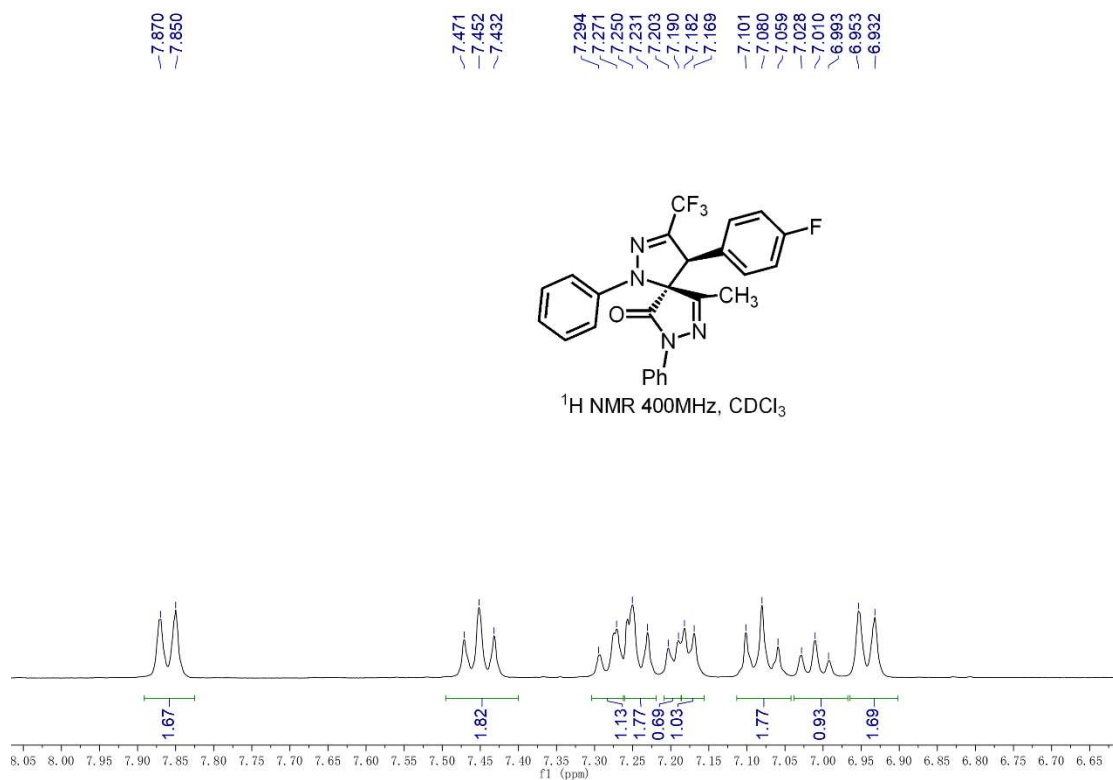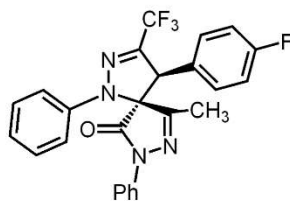

<sup>1</sup>H NMR 400MHz, CDCl<sub>3</sub>

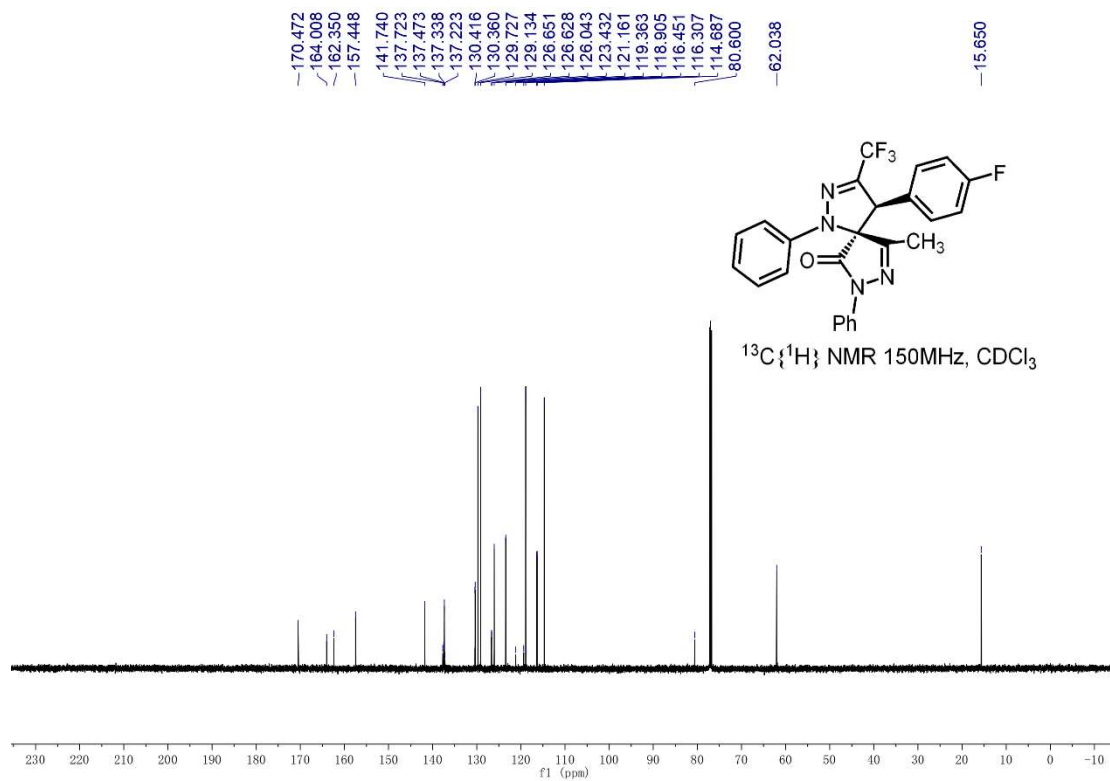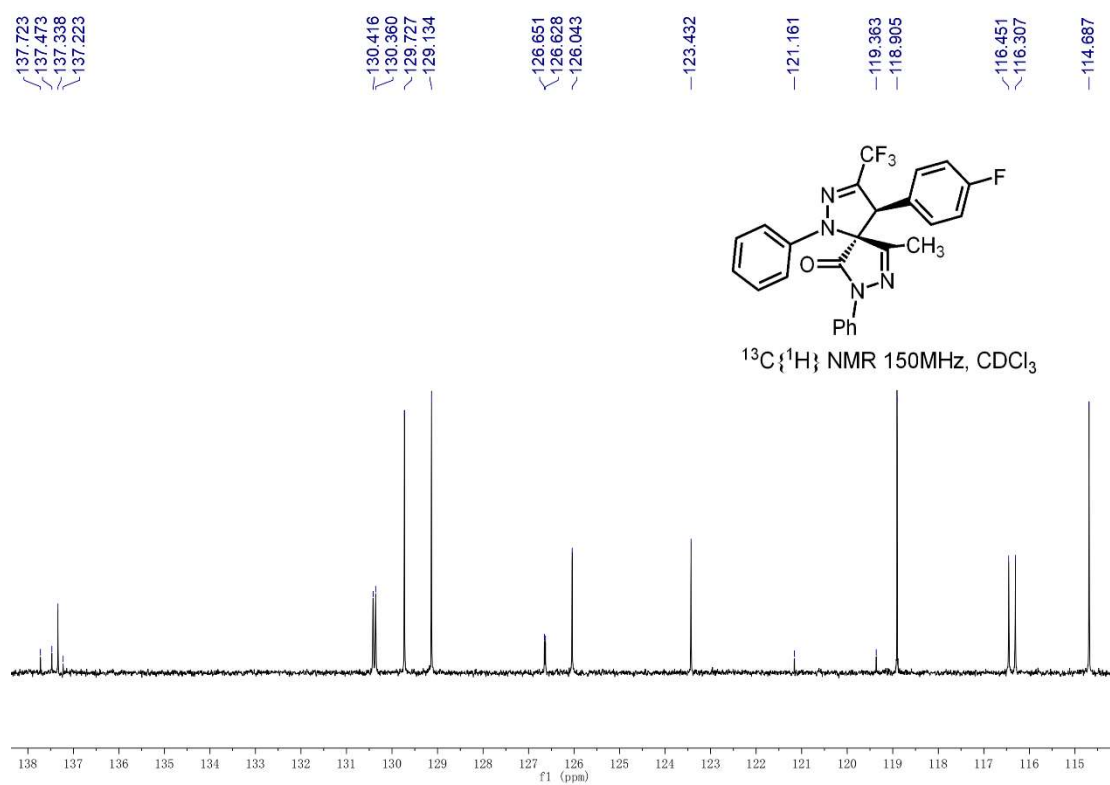

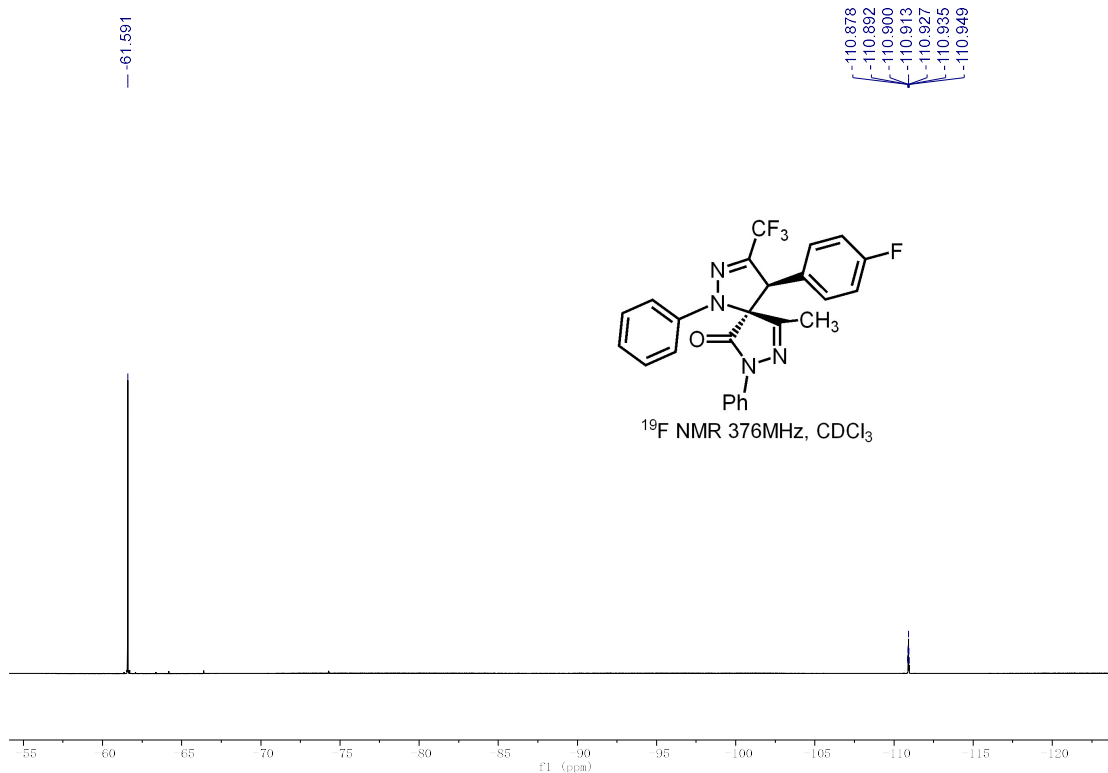

HRMS (ESI) copy of compound (*trans*)-6f:

### Mass Spectrum SmartFormula Report

#### Analysis Info

Analysis Name D:\Data\user\NWNW-fengyang 20230322-9.d  
 Method tune\_low.m  
 Sample Name A-43  
 Comment

Acquisition Date 2023-3-22 9:36:11  
 Operator BDAL@DE  
 Instrument / Ser# micrOTOF-Q 20453

#### Acquisition Parameter

|             |          |                       |           |                  |           |
|-------------|----------|-----------------------|-----------|------------------|-----------|
| Source Type | ESI      | Ion Polarity          | Positive  | Set Nebulizer    | 0.4 Bar   |
| Focus       | Active   | Set Capillary         | 4500 V    | Set Dry Heater   | 180 j°C   |
| Scan Begin  | 50 m/z   | Set End Plate Offset  | -500 V    | Set Dry Gas      | 4.0 l/min |
| Scan End    | 1000 m/z | Set Collision Cell RF | 400.0 Vpp | Set Divert Valve | Waste     |

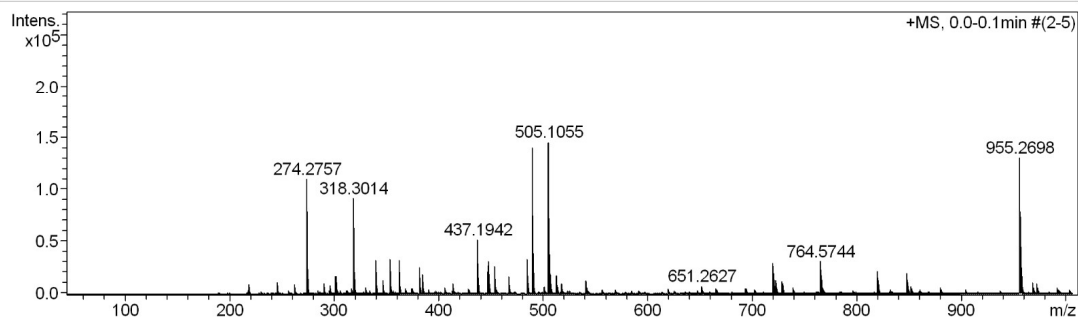

| Meas. #  | Formula                                                             | m/z      | err [ppm] | Me an err [ppm] | rdb  | N-R | ej%  | mS  | Std | Std | Std  | Std | Std   |
|----------|---------------------------------------------------------------------|----------|-----------|-----------------|------|-----|------|-----|-----|-----|------|-----|-------|
| m/z      |                                                                     |          |           |                 |      | ul  | Conf | ig  | l   | Me  | Std  | Std | Std   |
|          |                                                                     |          |           |                 |      | e   |      | ma  |     | m/  | l    | m/  | Com   |
|          |                                                                     |          |           |                 |      |     |      |     |     | z   | rN   | z   | Dev   |
|          |                                                                     |          |           |                 |      |     |      |     |     | or  | Diff |     |       |
|          |                                                                     |          |           |                 |      |     |      |     |     | m   |      |     |       |
| 489.1315 | 1 C <sub>25</sub> H <sub>18</sub> F <sub>4</sub> N <sub>4</sub> NaO | 489.1309 | -1.1      | -1.0            | 16.5 | ok  | even | 7.4 | 9.8 | 0.5 | 4.8  | 0.1 | 842.7 |



NMR copies of compound (*cis*)-**6f**:

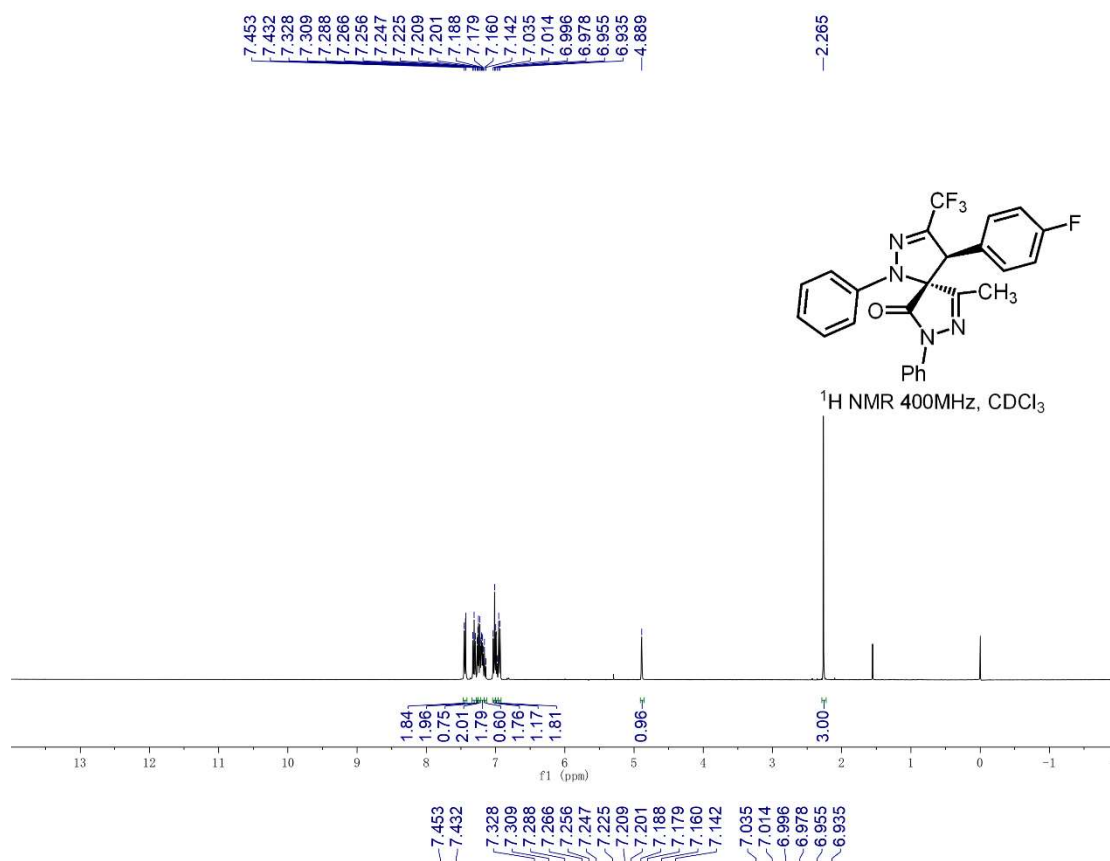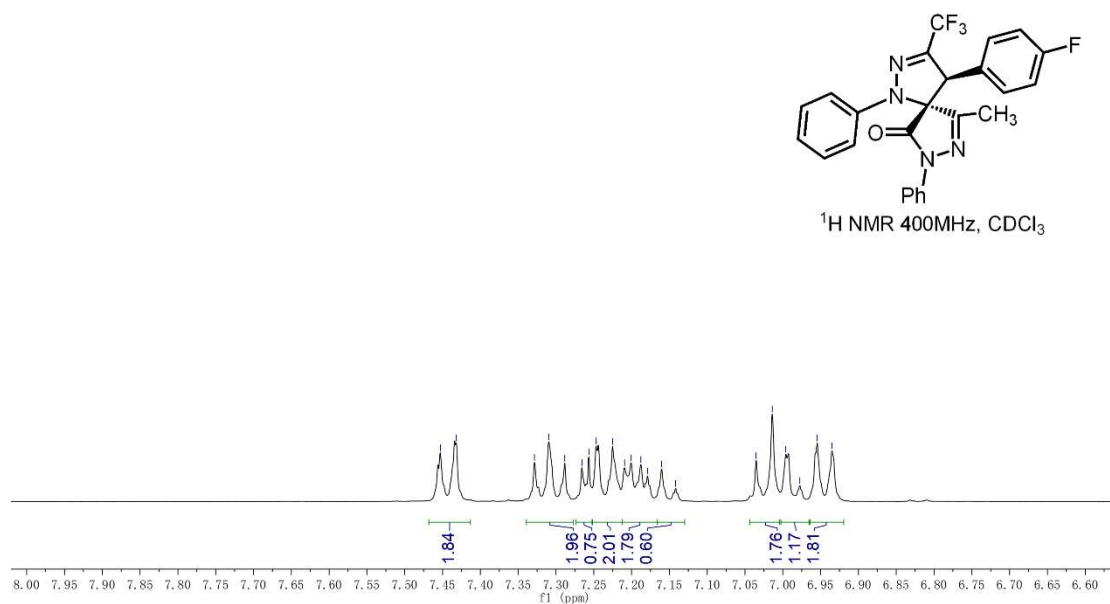

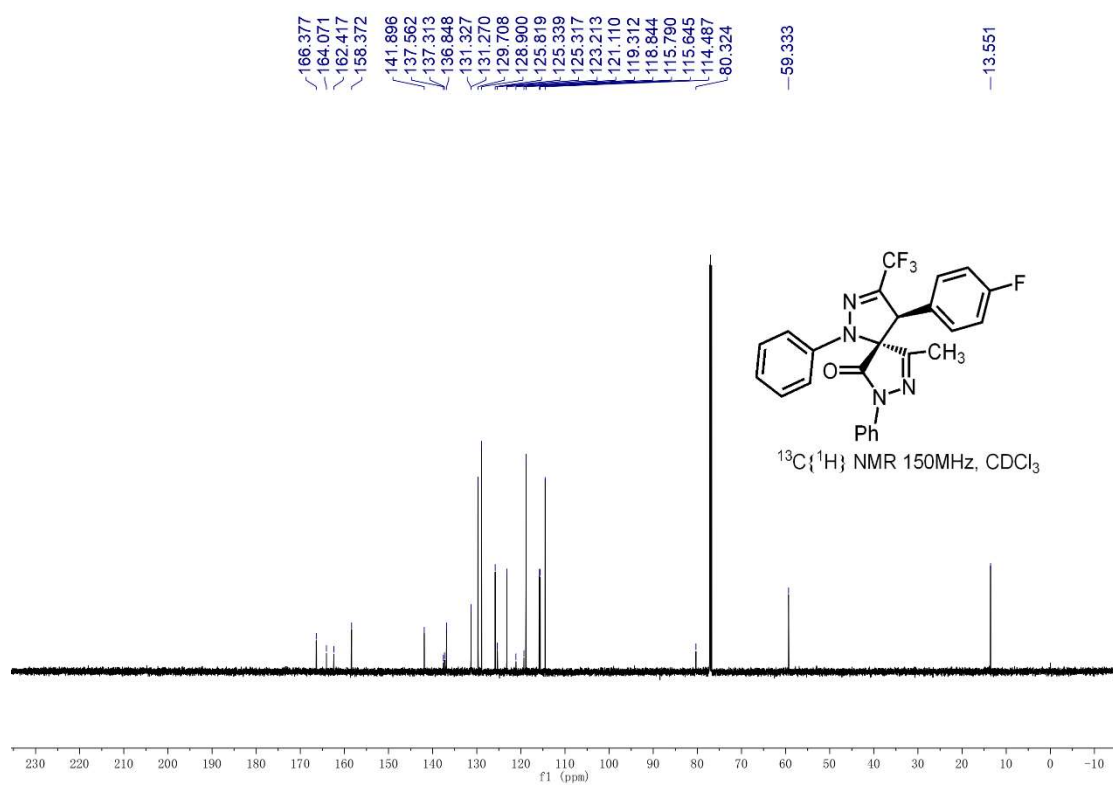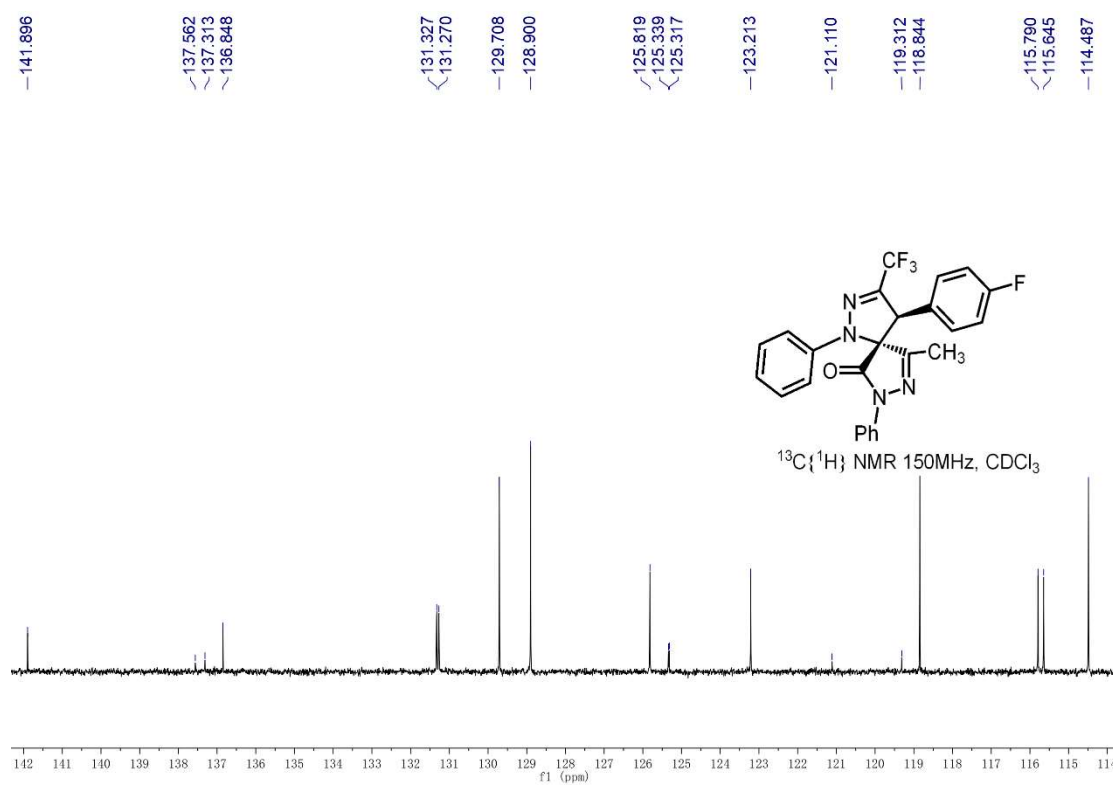

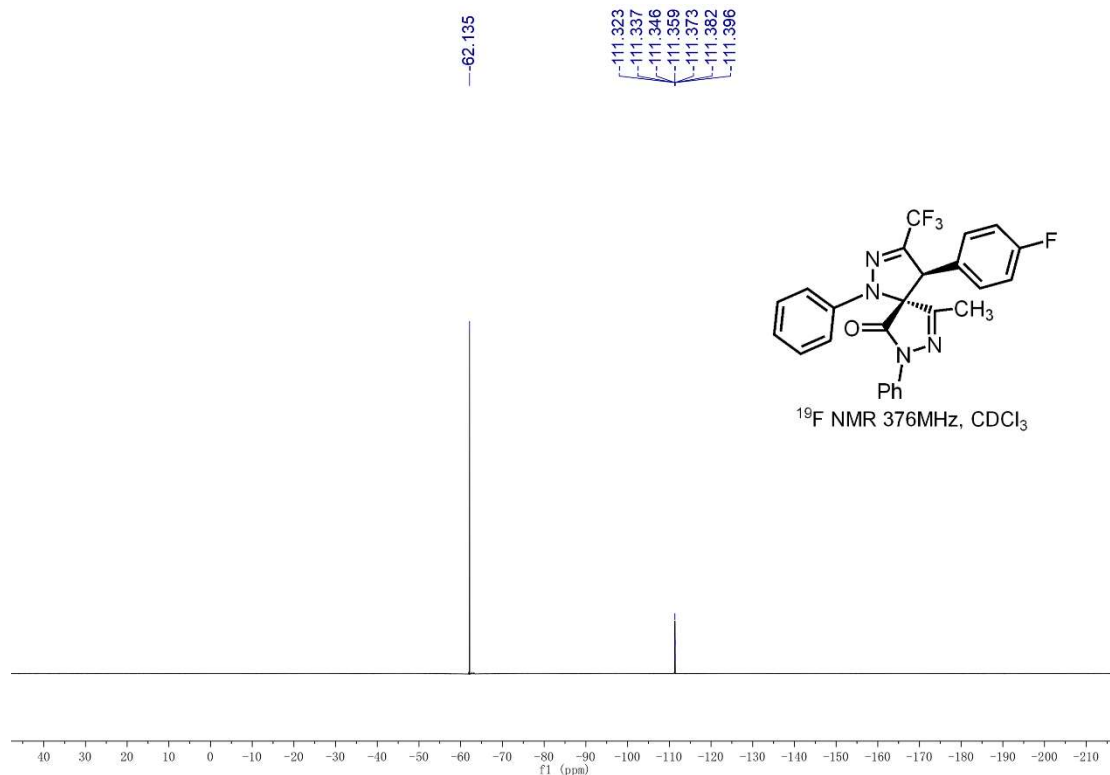

HRMS (ESI) copy of compound (*cis*)-6f:

### Mass Spectrum SmartFormula Report

**Analysis Info**

Analysis Name D:\Data\user\NWNNU-fengyang 20230322-10.d  
 Method tune\_low.m  
 Sample Name A-431  
 Comment

Acquisition Date 2023-3-22 9:38:19

Operator BDAL@DE  
 Instrument / Ser# micrOTOF-Q 20453

**Acquisition Parameter**

|             |          |                       |           |                  |           |
|-------------|----------|-----------------------|-----------|------------------|-----------|
| Source Type | ESI      | Ion Polarity          | Positive  | Set Nebulizer    | 0.4 Bar   |
| Focus       | Active   | Set Capillary         | 4500 V    | Set Dry Heater   | 180 j°C   |
| Scan Begin  | 50 m/z   | Set End Plate Offset  | -500 V    | Set Dry Gas      | 4.0 l/min |
| Scan End    | 1000 m/z | Set Collision Cell RF | 400.0 Vpp | Set Divert Valve | Waste     |

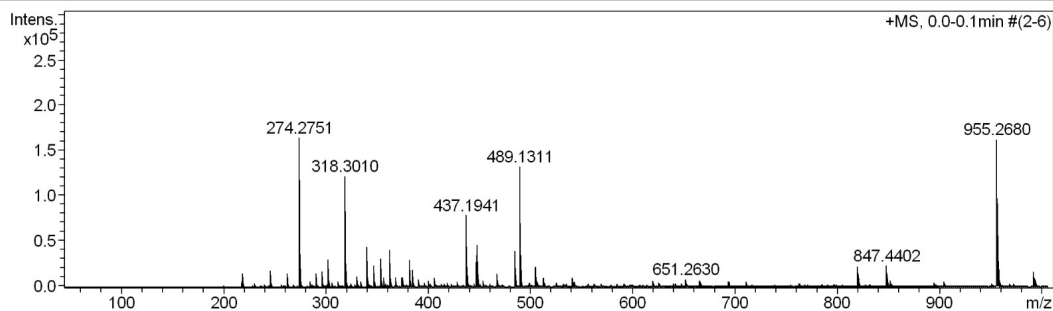

| Meas. #  | Formula                                                             | m/z      | err [ppm] | Me an err [ppm] | rdb  | N-R | e j % Conf | mSi gm a | Std l | St d l | St d l | St d l | Std Com b Dev |
|----------|---------------------------------------------------------------------|----------|-----------|-----------------|------|-----|------------|----------|-------|--------|--------|--------|---------------|
| 489.1311 | 1 C <sub>25</sub> H <sub>18</sub> F <sub>4</sub> N <sub>4</sub> NaO | 489.1309 | -0.5      | -0.7            | 16.5 | ok  | even       | 10.6     | 14.3  | 0.4    | 6.7    | 0.5    | 842.7         |

NMR copies of compound (*trans*)-6g:

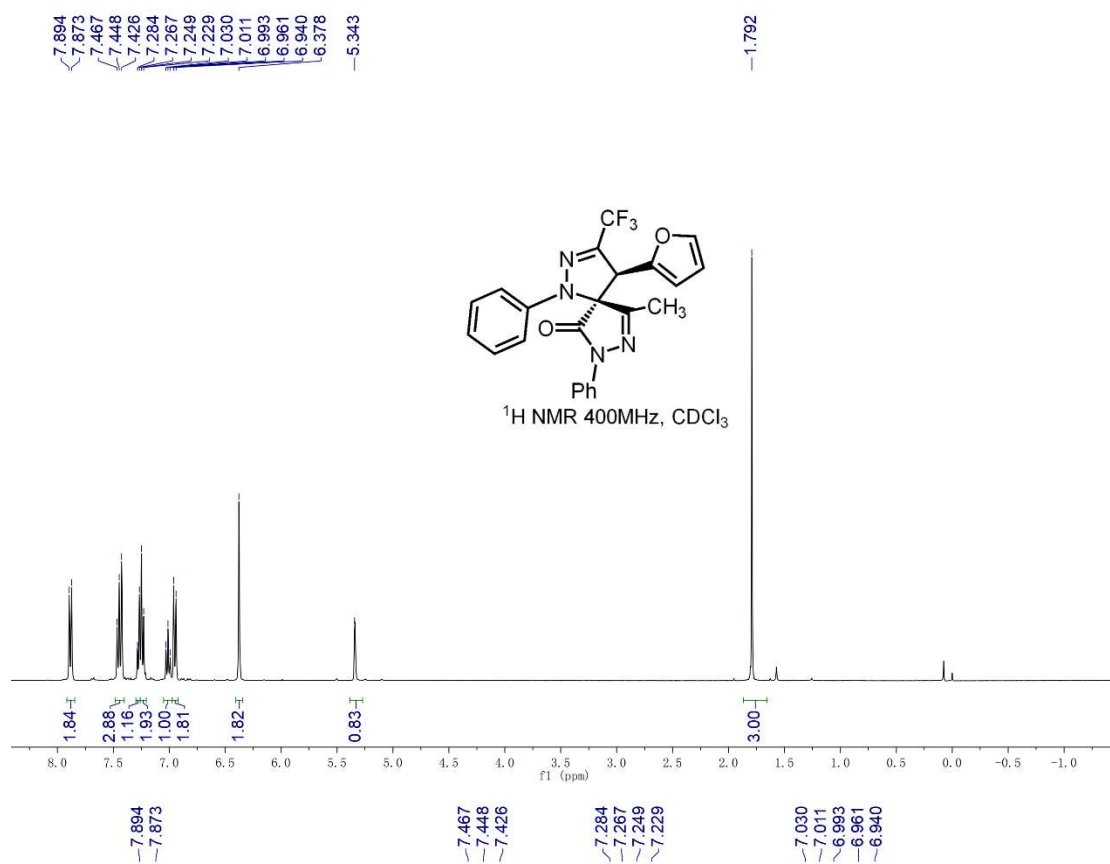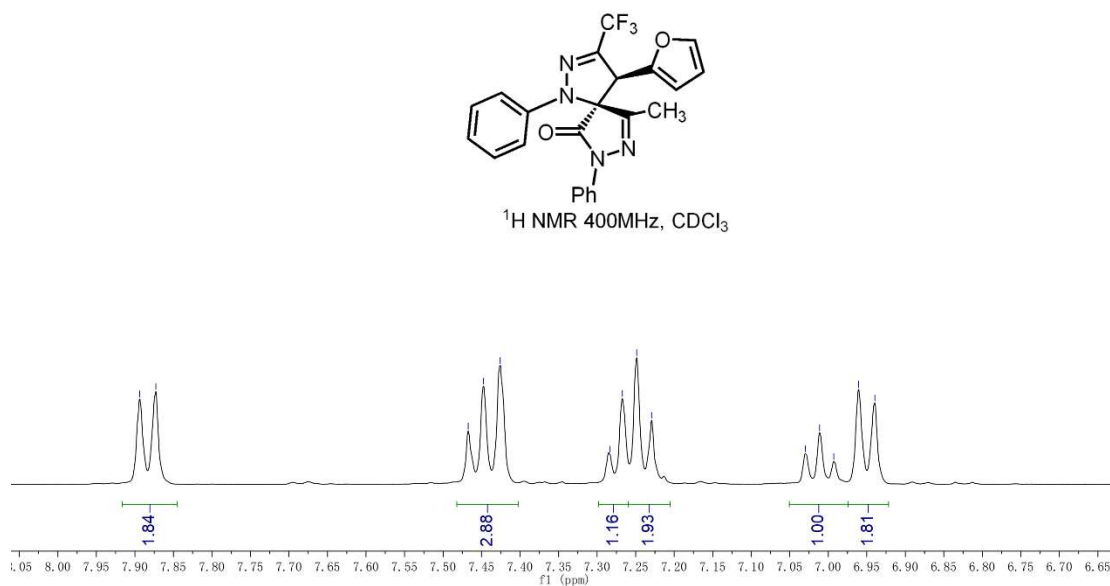

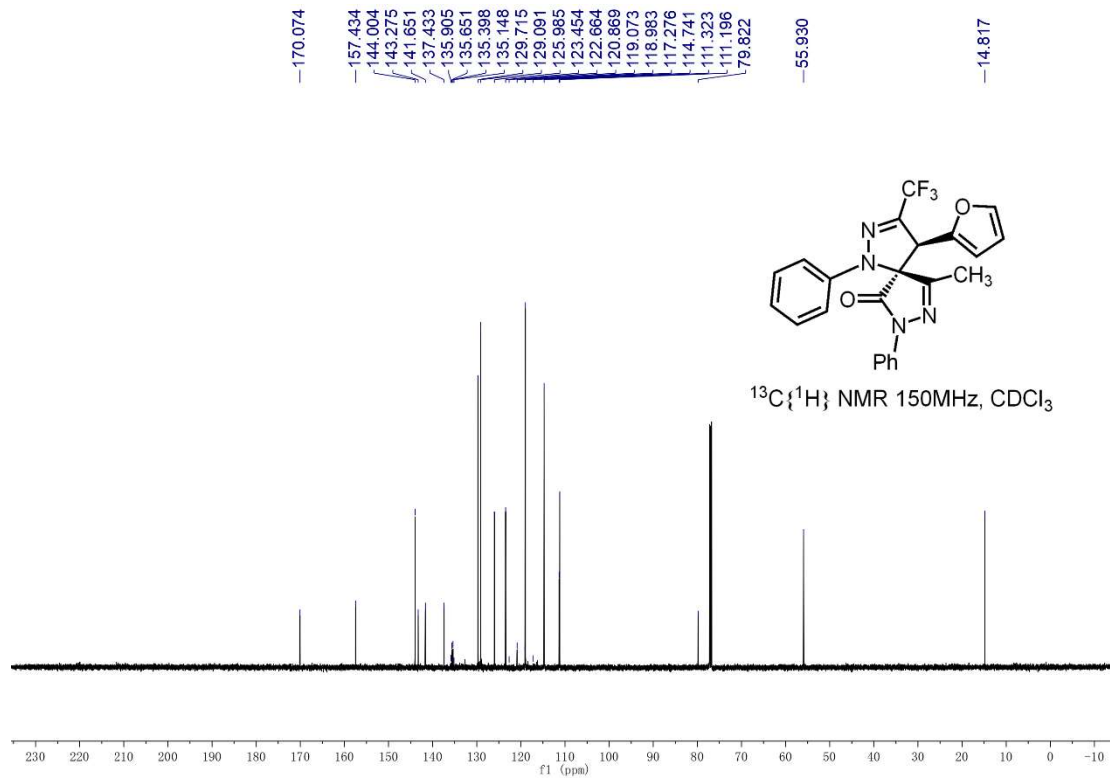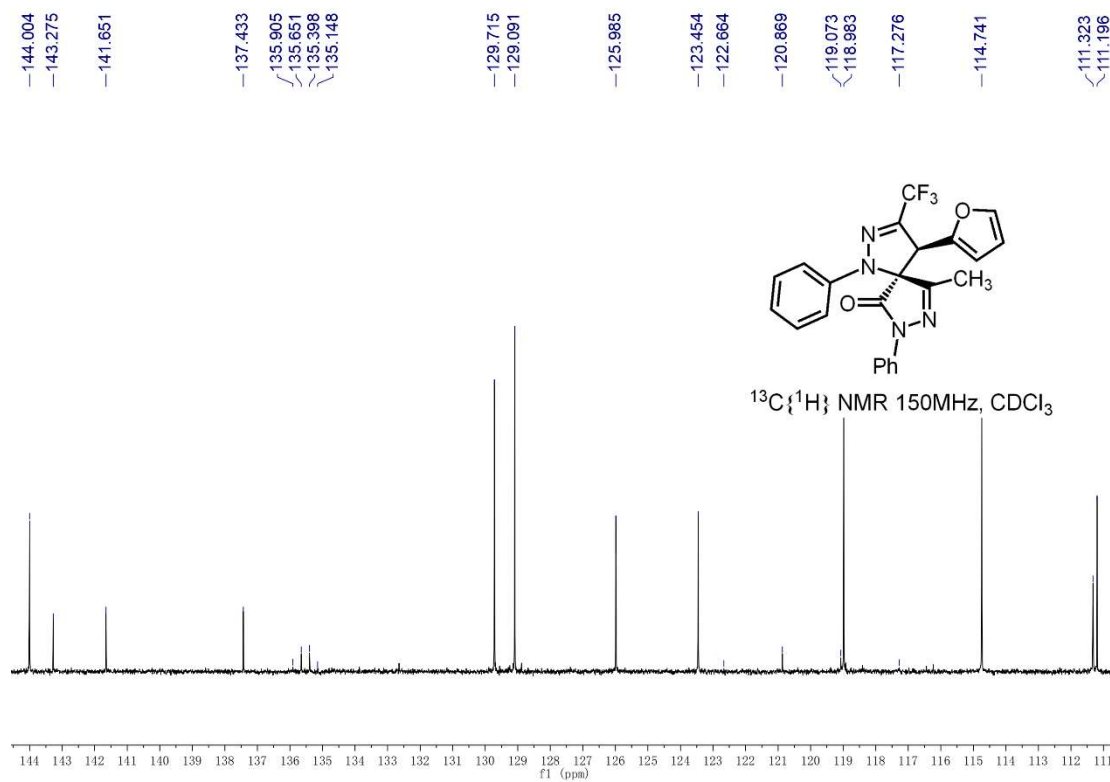

--63.314

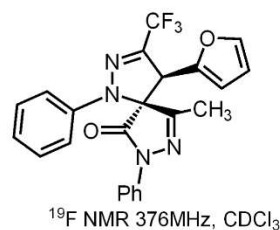

HRMS (ESI) copy of compound (*trans*)-6g:

### Mass Spectrum SmartFormula Report

#### Analysis Info

Analysis Name D:\Data\user\NWNNU-fengyang 20230322-11.d  
Method tune\_low.m  
Sample Name A-44  
Comment

Acquisition Date 2023-3-22 9:58:47  
Operator BDAL@DE  
Instrument / Ser# micrOTOF-Q 20453

#### Acquisition Parameter

|             |          |                       |           |                  |           |
|-------------|----------|-----------------------|-----------|------------------|-----------|
| Source Type | ESI      | Ion Polarity          | Positive  | Set Nebulizer    | 0.4 Bar   |
| Focus       | Active   | Set Capillary         | 4500 V    | Set Dry Heater   | 180 j°C   |
| Scan Begin  | 50 m/z   | Set End Plate Offset  | -500 V    | Set Dry Gas      | 4.0 l/min |
| Scan End    | 1000 m/z | Set Collision Cell RF | 400.0 Vpp | Set Divert Valve | Waste     |

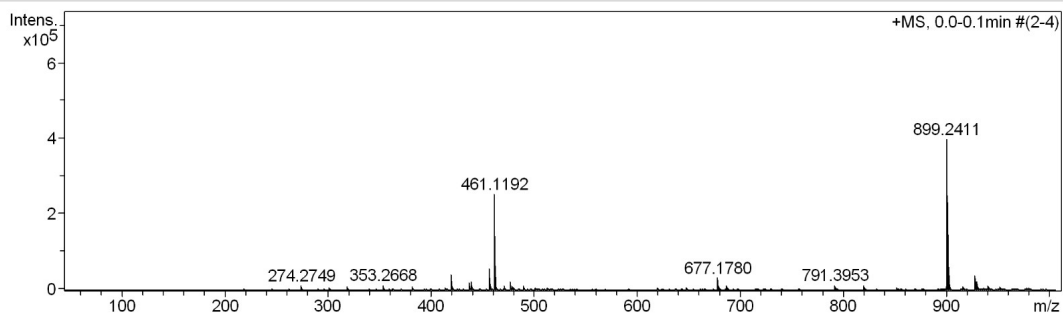

| Meas. #  | Formula                                                                        | m/z      | err [ppm] | Me an err [ppm] | rdb  | N-R | ei% Conf | m Sigma | Std l | St d l | St d l | St d l | Std Com b Dev |
|----------|--------------------------------------------------------------------------------|----------|-----------|-----------------|------|-----|----------|---------|-------|--------|--------|--------|---------------|
| 461.1192 | 1 C <sub>23</sub> H <sub>17</sub> F <sub>3</sub> N <sub>4</sub> O <sub>2</sub> | 461.1196 | 0.8       | 1.1             | 15.5 | ok  | even     | 7.8     | 13.2  | 0.5    | 5.9    | 0.4    | 842.7         |

NMR copies of compound (*cis*)-**6g**:

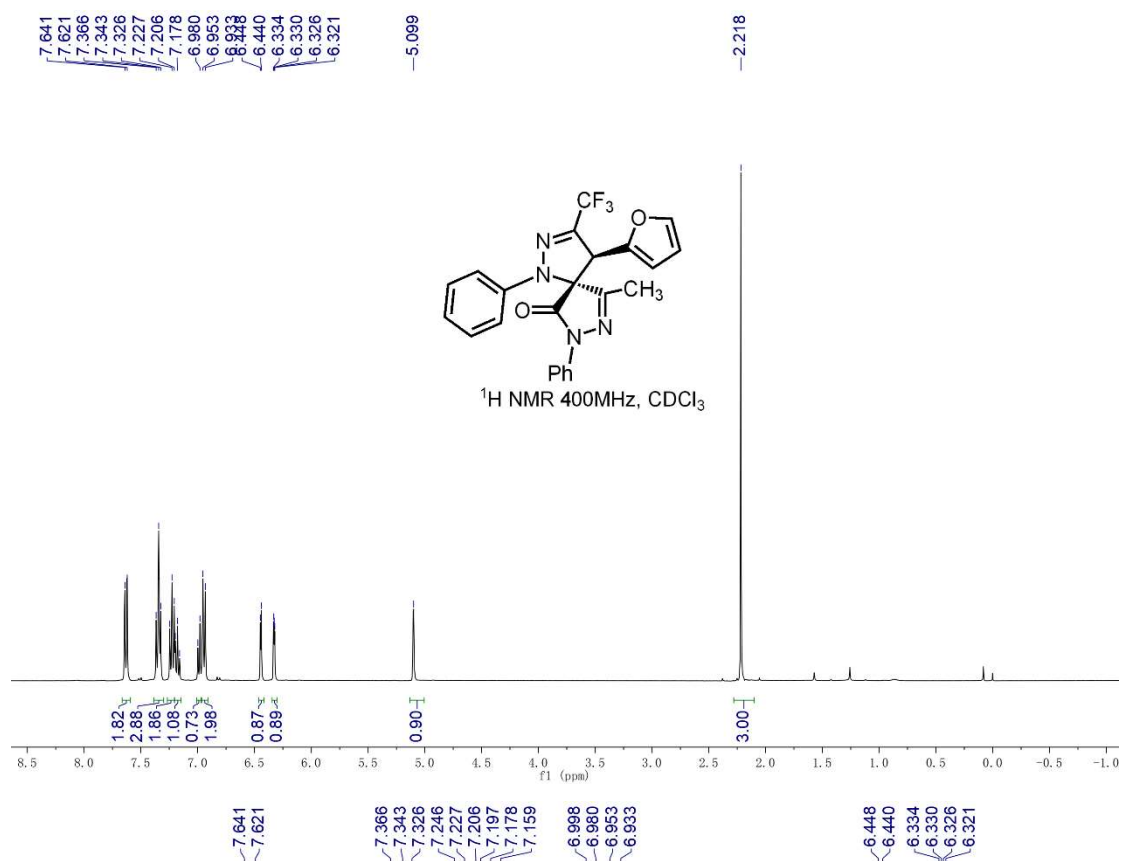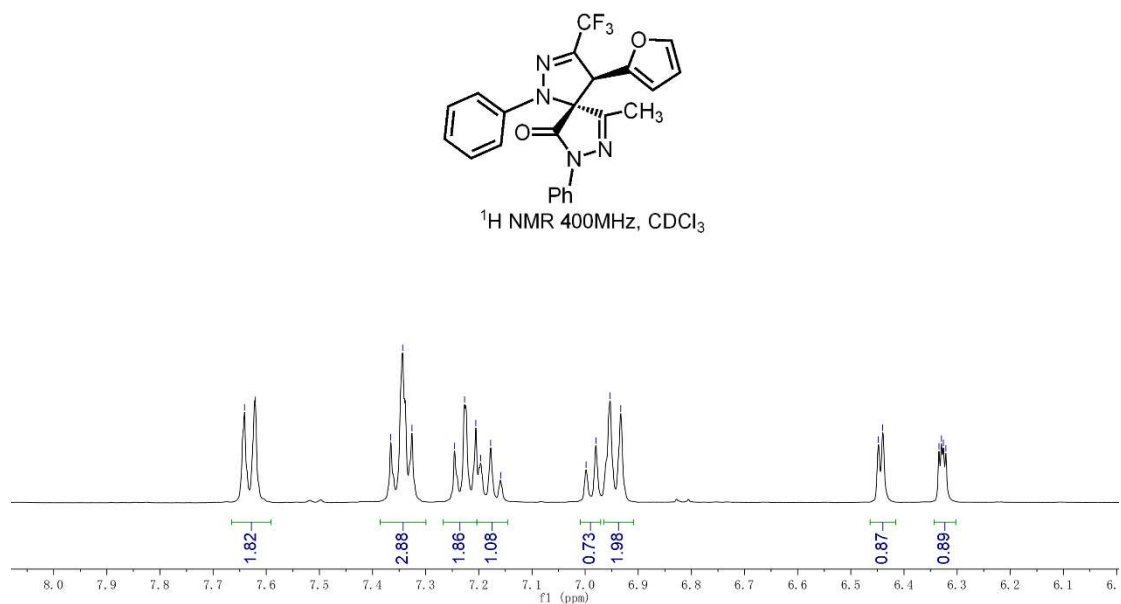

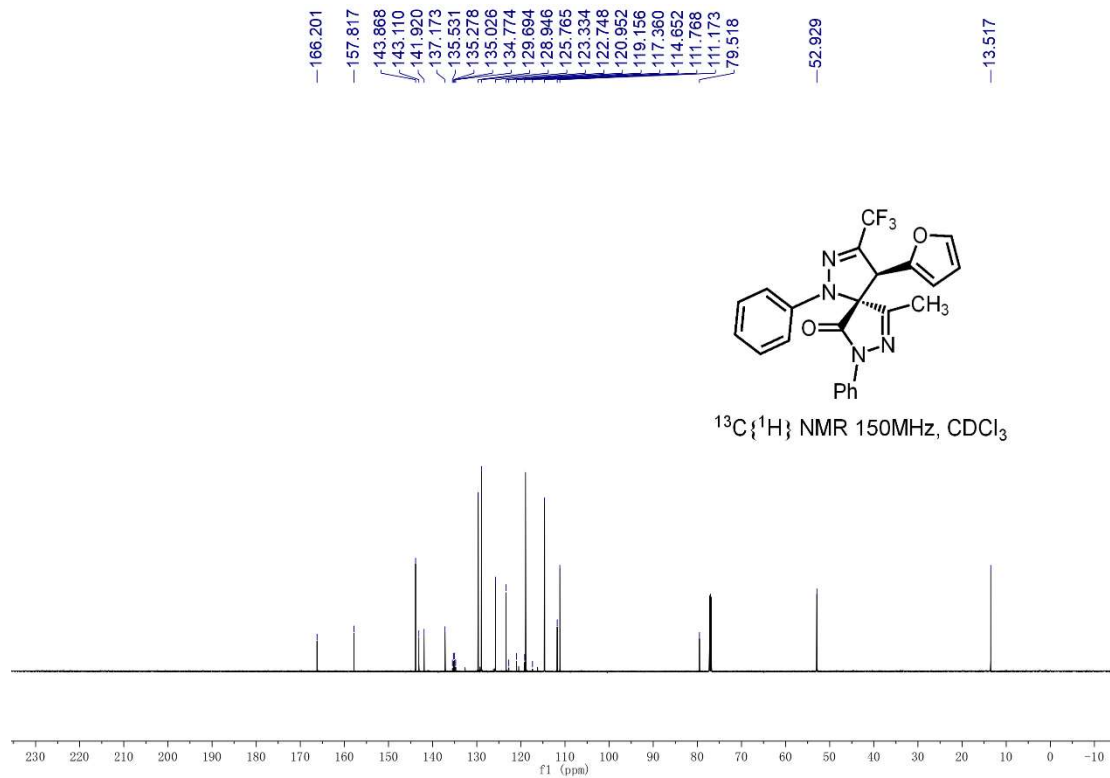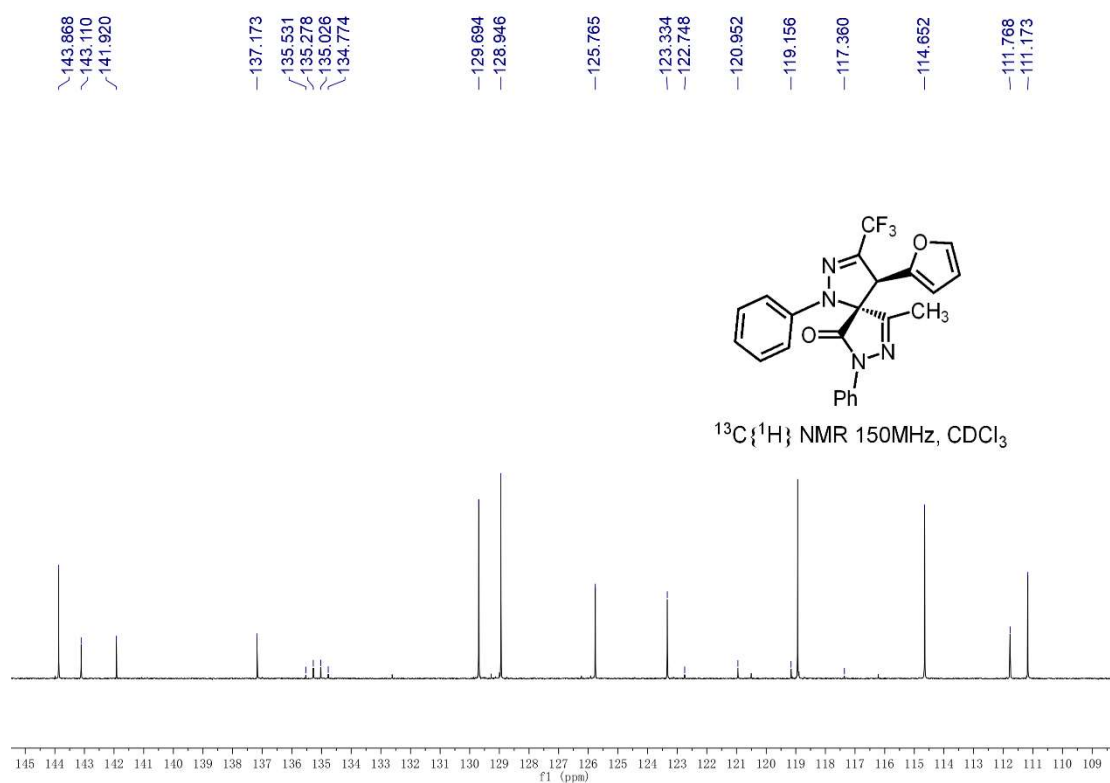



62.988

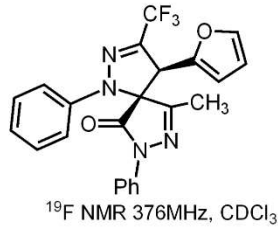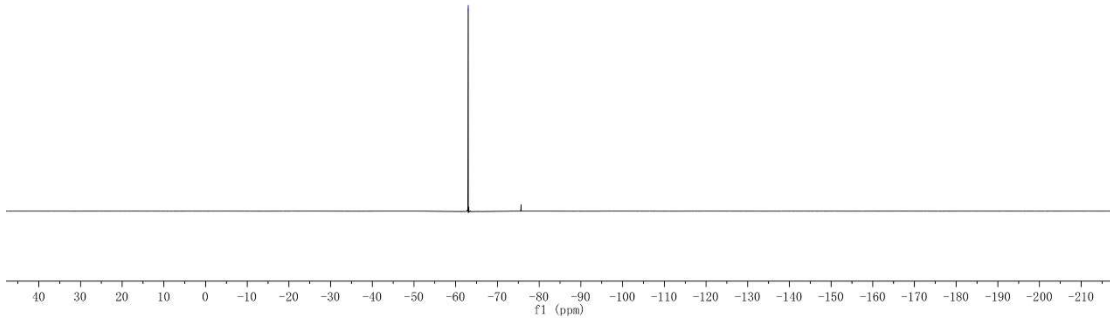

HRMS (ESI) copy of compound (*cis*)-6g:

### Mass Spectrum SmartFormula Report

#### Analysis Info

Analysis Name D:\Data\user\NWNW-fengyang 20230322-12.d  
Method tune\_low.m  
Sample Name A-441  
Comment

Acquisition Date 2023-3-22 10:01:12  
Operator BDAL@DE  
Instrument / Ser# micrOTOF-Q 20453

#### Acquisition Parameter

|             |          |                       |           |                  |           |
|-------------|----------|-----------------------|-----------|------------------|-----------|
| Source Type | ESI      | Ion Polarity          | Positive  | Set Nebulizer    | 0.4 Bar   |
| Focus       | Active   | Set Capillary         | 4500 V    | Set Dry Heater   | 180 j°C   |
| Scan Begin  | 50 m/z   | Set End Plate Offset  | -500 V    | Set Dry Gas      | 4.0 l/min |
| Scan End    | 1000 m/z | Set Collision Cell RF | 400.0 Vpp | Set Divert Valve | Waste     |

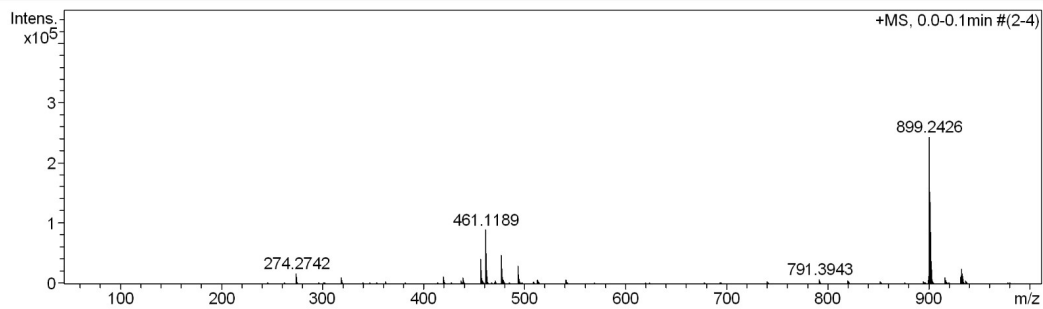

| Meas. #  | Formula                                                                          | m/z      | err [ppm] | Me an err [ppm] | rdb  | N-R | e <sub>j</sub> ¥ Conf | mS ig ma | Std l | Std Me an m/z | Std l Va rN or m | Std m/z Diff | Std Com b Dev |
|----------|----------------------------------------------------------------------------------|----------|-----------|-----------------|------|-----|-----------------------|----------|-------|---------------|------------------|--------------|---------------|
| 461.1189 | 1 C <sub>23</sub> H <sub>17</sub> F <sub>3</sub> N <sub>4</sub> NaO <sub>2</sub> | 461.1196 | 1.6       | 2.1             | 15.5 | ok  | even                  | 1.4      | 2.4   | 1.1           | 1.6              | 1.0          | 842.7         |

NMR copies of compound (*trans*)-6h:

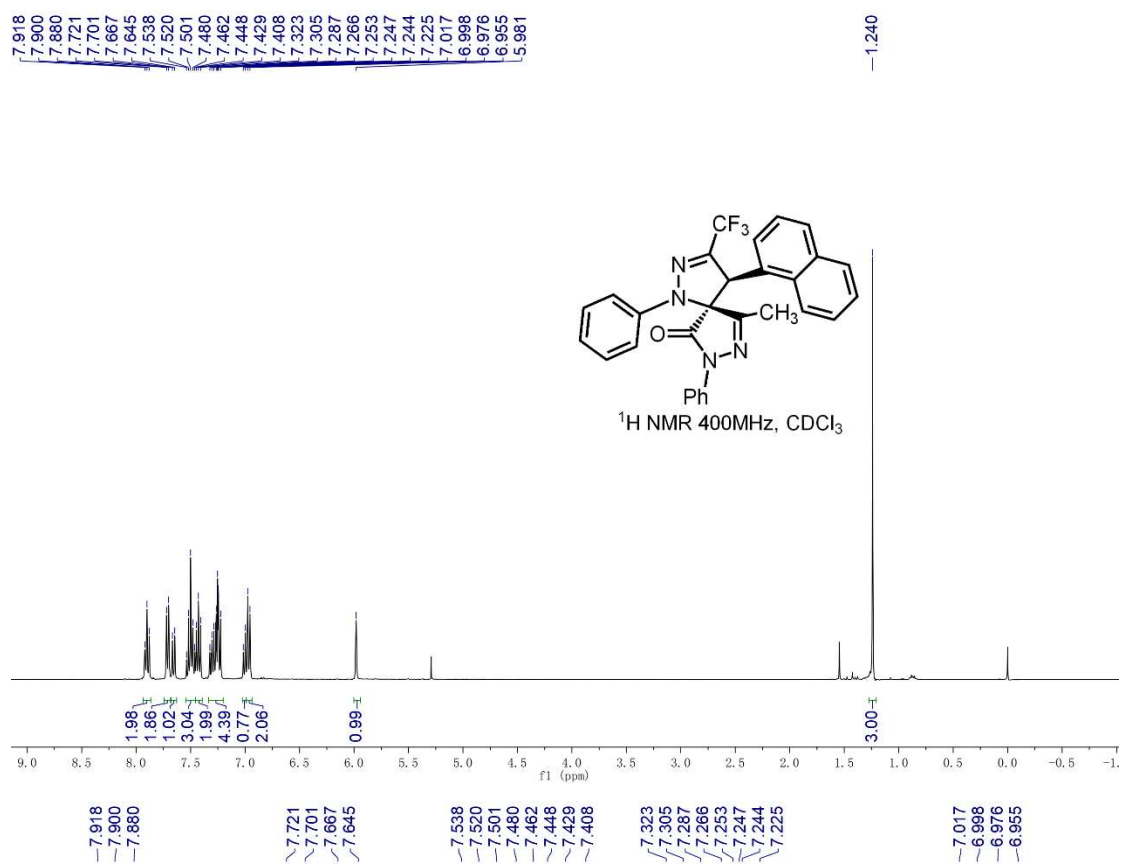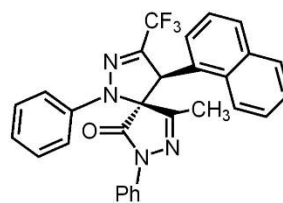

<sup>1</sup>H NMR 400MHz, CDCl<sub>3</sub>

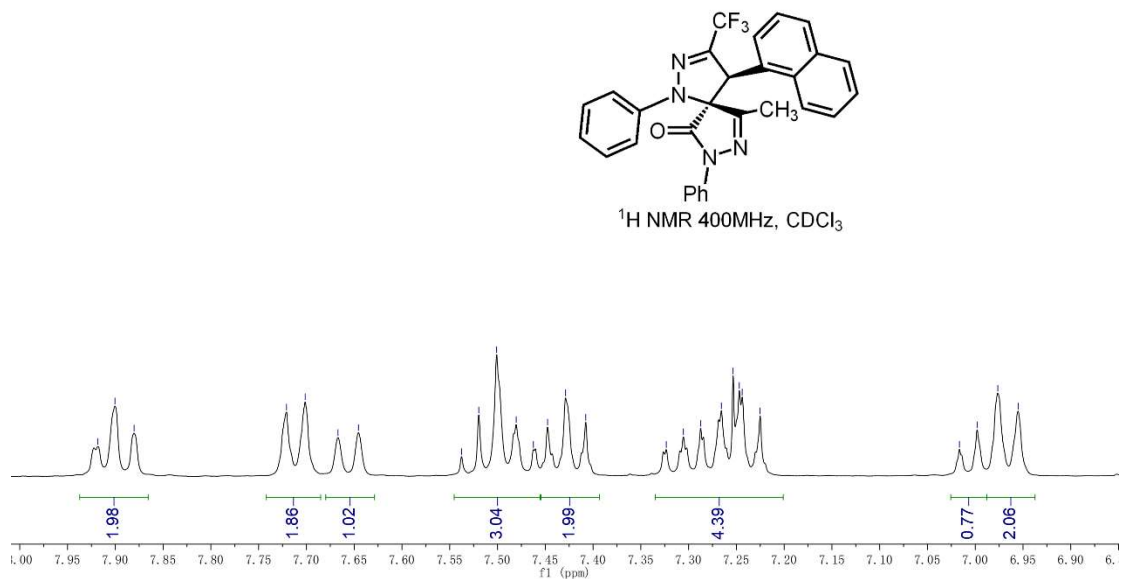

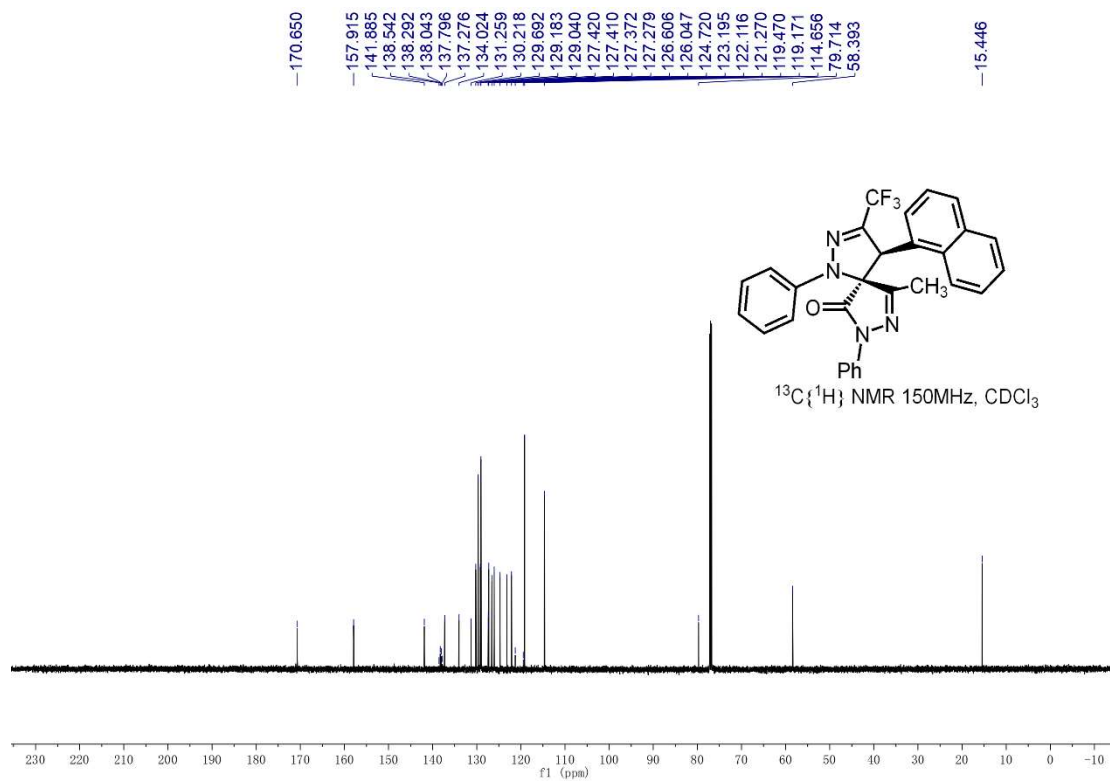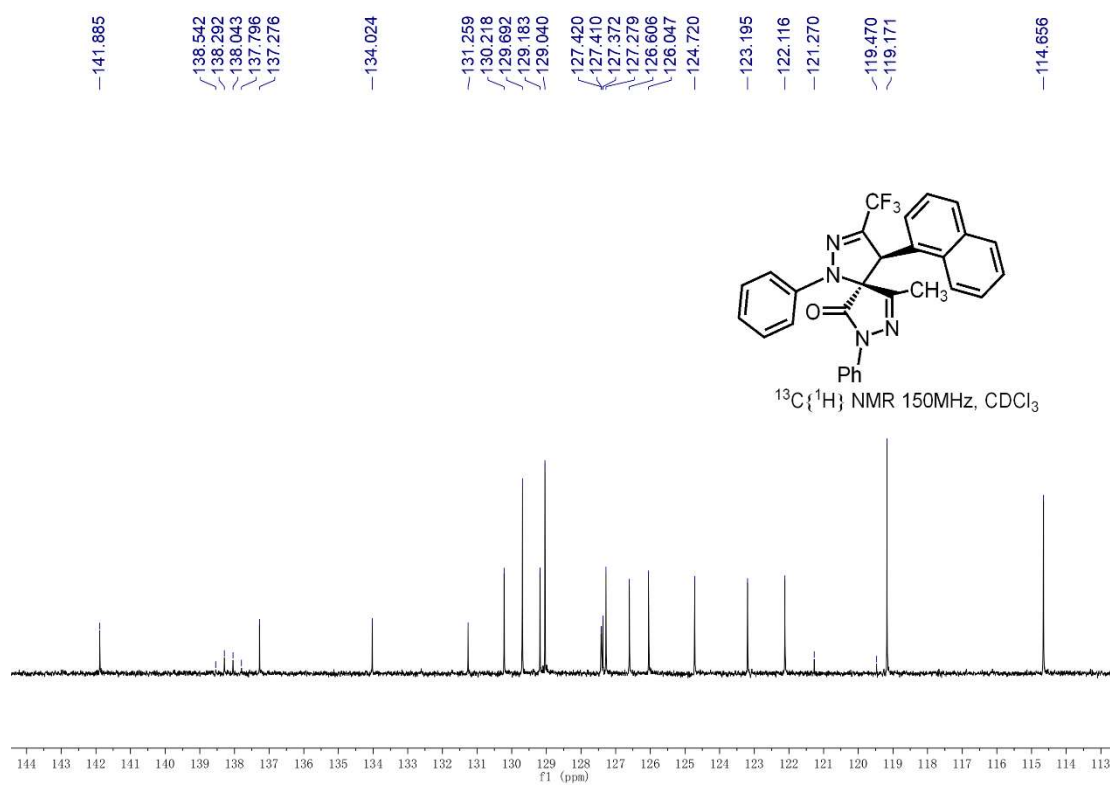

-61.024

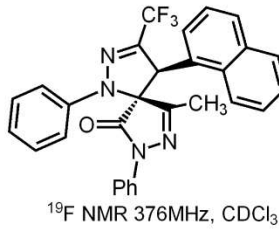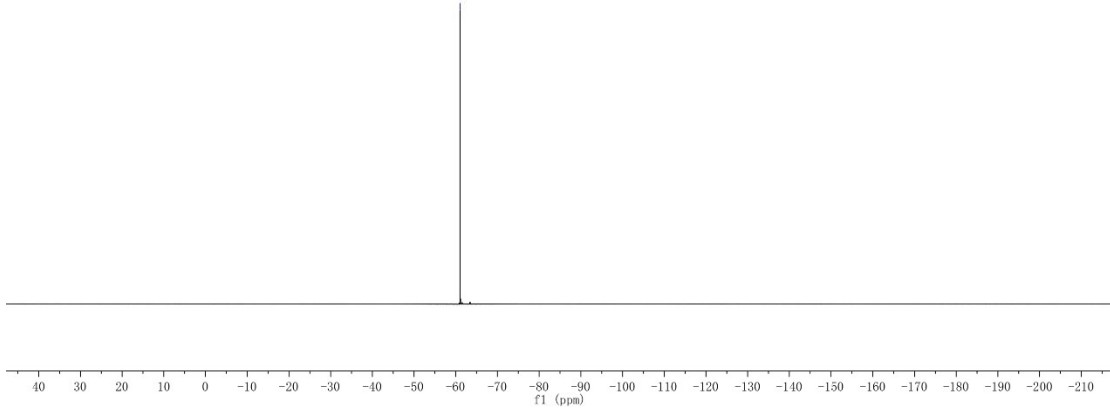

HRMS (ESI) copy of compound (*trans*)-6h:

### Mass Spectrum SmartFormula Report

#### Analysis Info

Analysis Name D:\Data\user\NWNNU-fengyang 20230322-13.d  
Method tune\_low.m  
Sample Name A-45  
Comment

Acquisition Date 2023-3-22 10:04:34

Operator BDAL@DE  
Instrument / Ser# micrOTOF-Q 20453

#### Acquisition Parameter

|             |          |                       |           |                  |           |
|-------------|----------|-----------------------|-----------|------------------|-----------|
| Source Type | ESI      | Ion Polarity          | Positive  | Set Nebulizer    | 0.4 Bar   |
| Focus       | Active   | Set Capillary         | 4500 V    | Set Dry Heater   | 180 i°C   |
| Scan Begin  | 50 m/z   | Set End Plate Offset  | -500 V    | Set Dry Gas      | 4.0 l/min |
| Scan End    | 1000 m/z | Set Collision Cell RF | 400.0 Vpp | Set Divert Valve | Waste     |

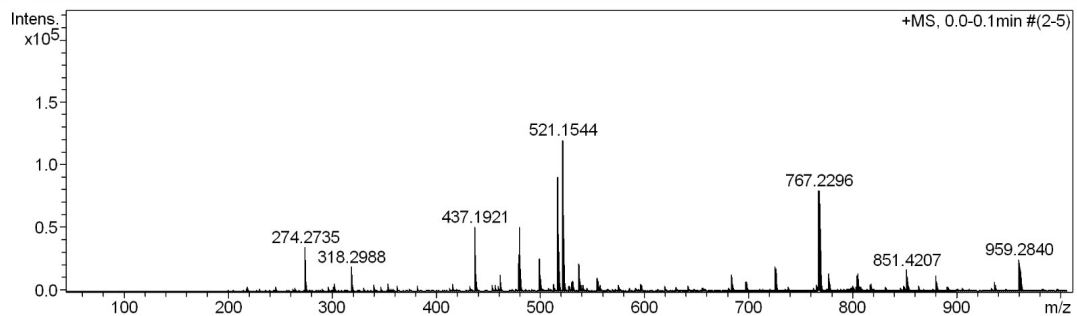

| Meas. #  | Formula | m/z                                                               | err [ppm] | Me an err [ppm] | rdb | N-R  | e <sub>j</sub> Conf | mS   | Std | Std  | Std | Std  | Std |       |
|----------|---------|-------------------------------------------------------------------|-----------|-----------------|-----|------|---------------------|------|-----|------|-----|------|-----|-------|
| m/z      |         |                                                                   |           |                 |     | ul   |                     | ig   | I   | Me   | I   | m/   | Com |       |
|          |         |                                                                   |           |                 |     | e    |                     | ma   |     | an   | Va  | z    | b   |       |
|          |         |                                                                   |           |                 |     |      |                     |      |     | m/   | rN  | Diff | Dev |       |
|          |         |                                                                   |           |                 |     |      |                     |      |     | z    | or  |      |     |       |
|          |         |                                                                   |           |                 |     |      |                     |      |     | m    |     |      |     |       |
| 521.1544 | 1       | C <sub>29</sub> H <sub>21</sub> F <sub>3</sub> N <sub>4</sub> NaO | 521.1560  | 3.0             | 3.3 | 19.5 | ok                  | even | 8.5 | 13.3 | 1.7 | 4.8  | 0.5 | 842.7 |

NMR copies of compound (*cis*)-**6h**:

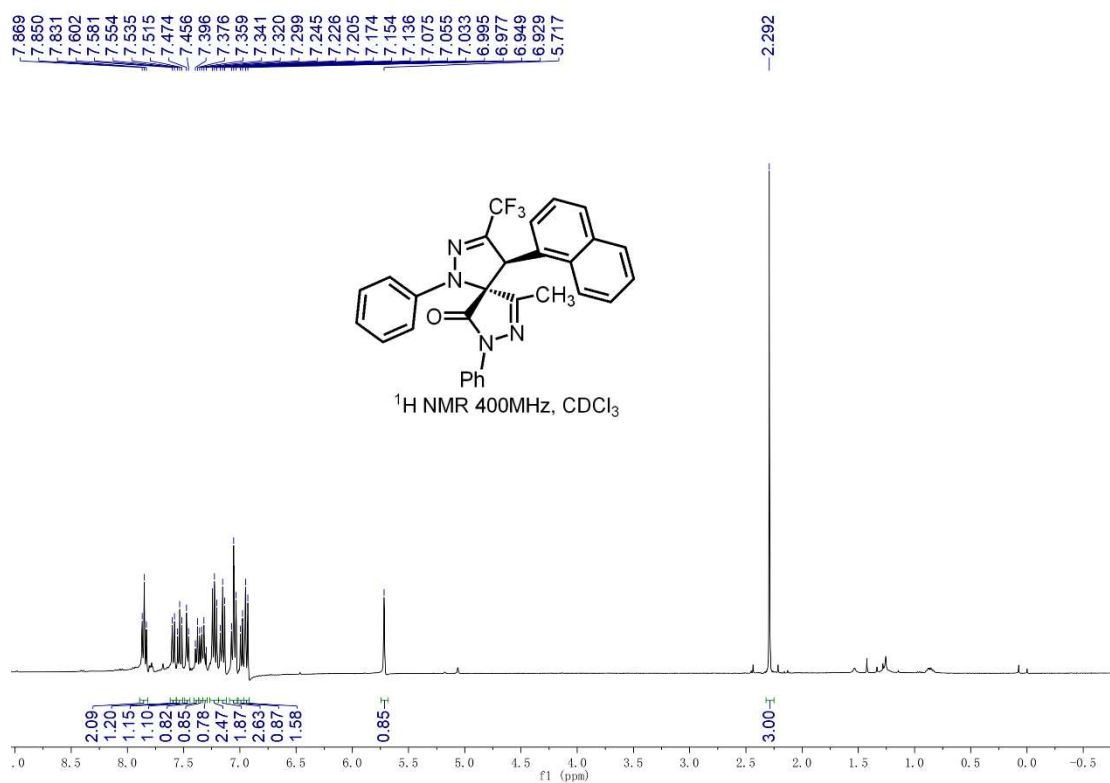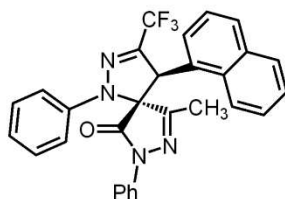

<sup>1</sup>H NMR 400MHz, CDCl<sub>3</sub>

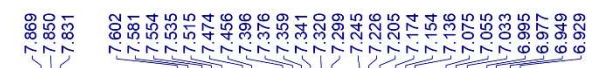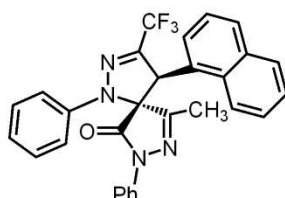

<sup>1</sup>H NMR 400MHz, CDCl<sub>3</sub>

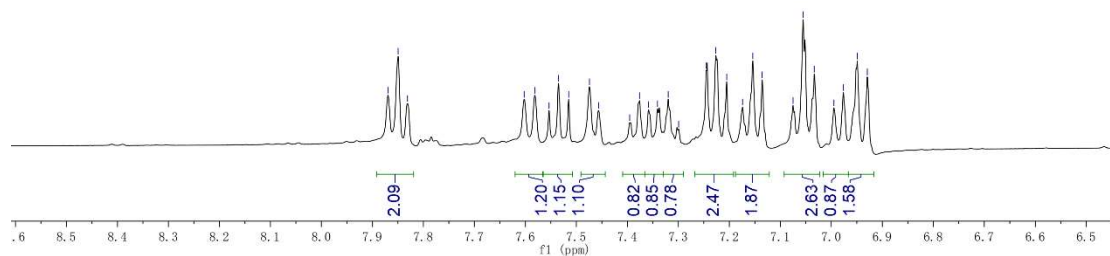

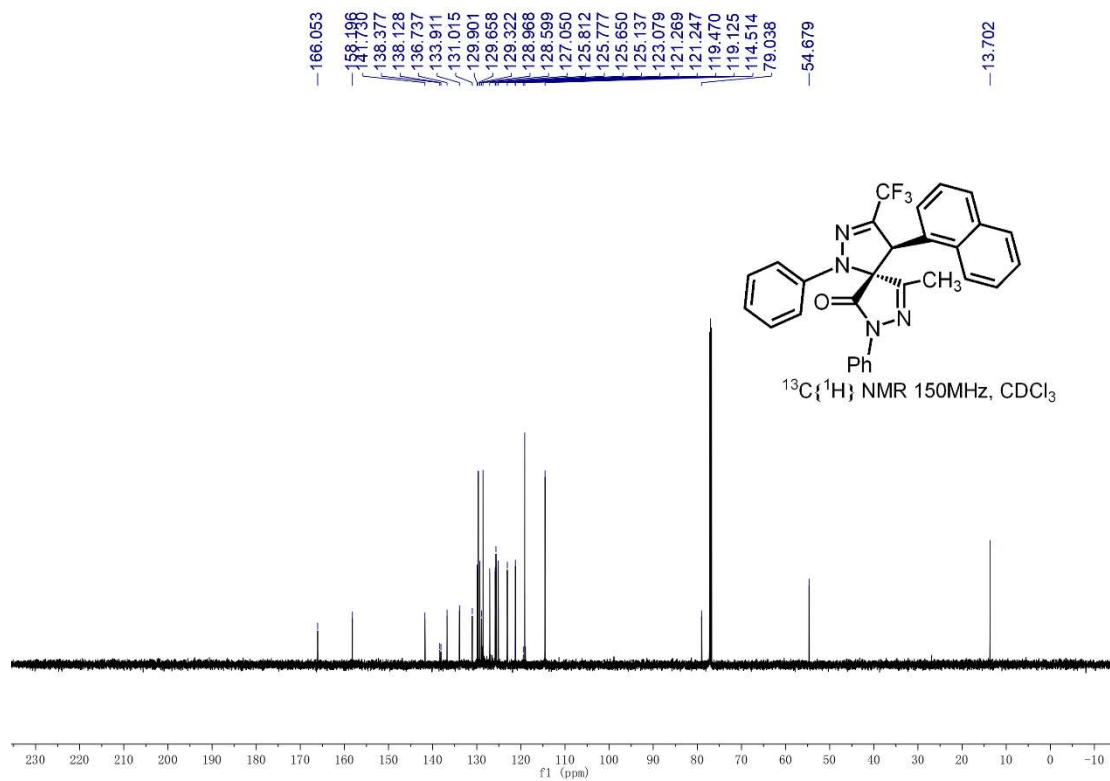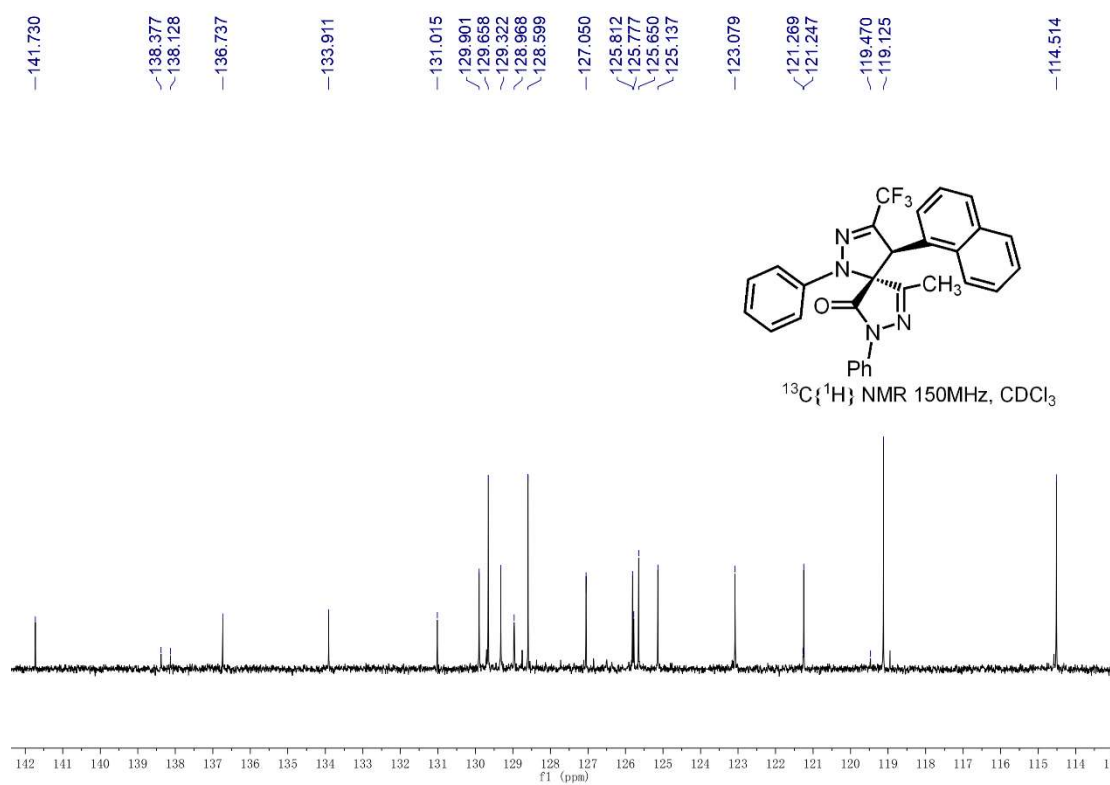

---61.753

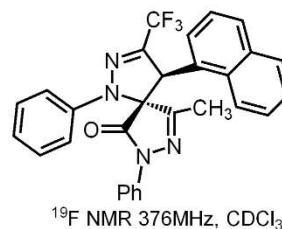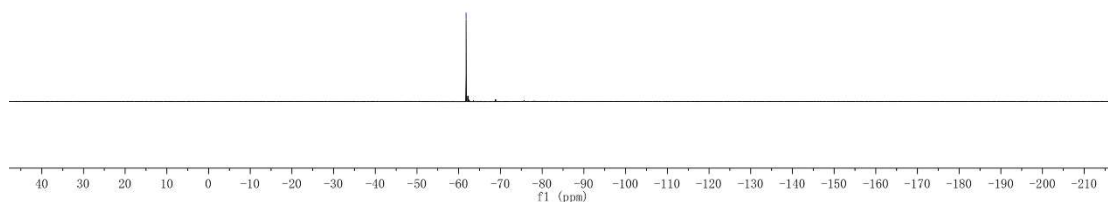

HRMS (ESI) copy of compound (*cis*)-**6h**:

### Mass Spectrum SmartFormula Report

#### Analysis Info

Analysis Name D:\Data\user\NWNU-fengyang 20230322-14.d  
Method tune\_low.m  
Sample Name A-451  
Comment

Acquisition Date 2023-3-22 10:07:10

Operator BDAL@DE  
Instrument / Ser# micrOTOF-Q 20453

#### Acquisition Parameter

|             |          |                       |           |                  |           |
|-------------|----------|-----------------------|-----------|------------------|-----------|
| Source Type | ESI      | Ion Polarity          | Positive  | Set Nebulizer    | 0.4 Bar   |
| Focus       | Active   | Set Capillary         | 4500 V    | Set Dry Heater   | 180 j°C   |
| Scan Begin  | 50 m/z   | Set End Plate Offset  | -500 V    | Set Dry Gas      | 4.0 l/min |
| Scan End    | 1000 m/z | Set Collision Cell RF | 400.0 Vpp | Set Divert Valve | Waste     |

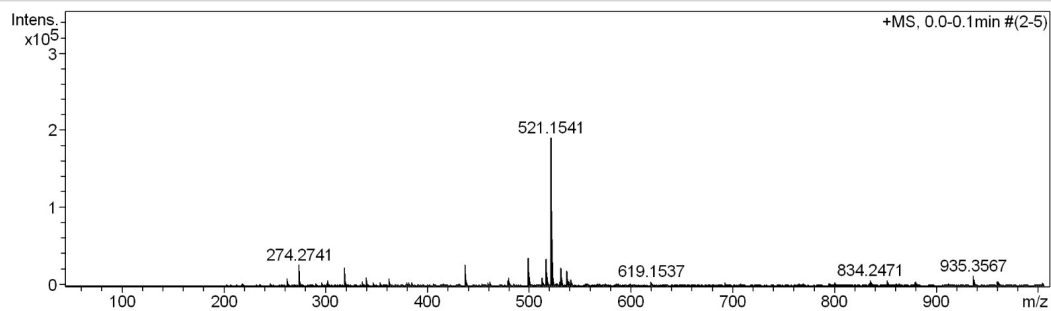

| Meas. #  | Formula | m/z                                                               | err [ppm] | Mean err [ppm] | rdb | N- R | ei % | Conf | mS  | Std  | Std | Std | Std  | Std   |
|----------|---------|-------------------------------------------------------------------|-----------|----------------|-----|------|------|------|-----|------|-----|-----|------|-------|
| m/z      |         |                                                                   |           |                |     | ul   |      |      | ig  | I    | Me  | I   | m/   | Com   |
|          |         |                                                                   |           |                |     | e    |      |      | ma  |      | an  | Va  | z    | b     |
|          |         |                                                                   |           |                |     |      |      |      |     |      | rN  | rN  | Diff | Dev   |
|          |         |                                                                   |           |                |     |      |      |      |     |      | z   | or  |      |       |
|          |         |                                                                   |           |                |     |      |      |      |     |      | m   |     |      |       |
| 521.1541 | 1       | C <sub>29</sub> H <sub>21</sub> F <sub>3</sub> N <sub>4</sub> NaO | 521.1560  | 3.5            | 3.2 | 19.5 | ok   | even | 7.4 | 10.8 | 1.7 | 4.4 | 0.5  | 842.7 |

NMR copies of compound (*trans*)-6i:

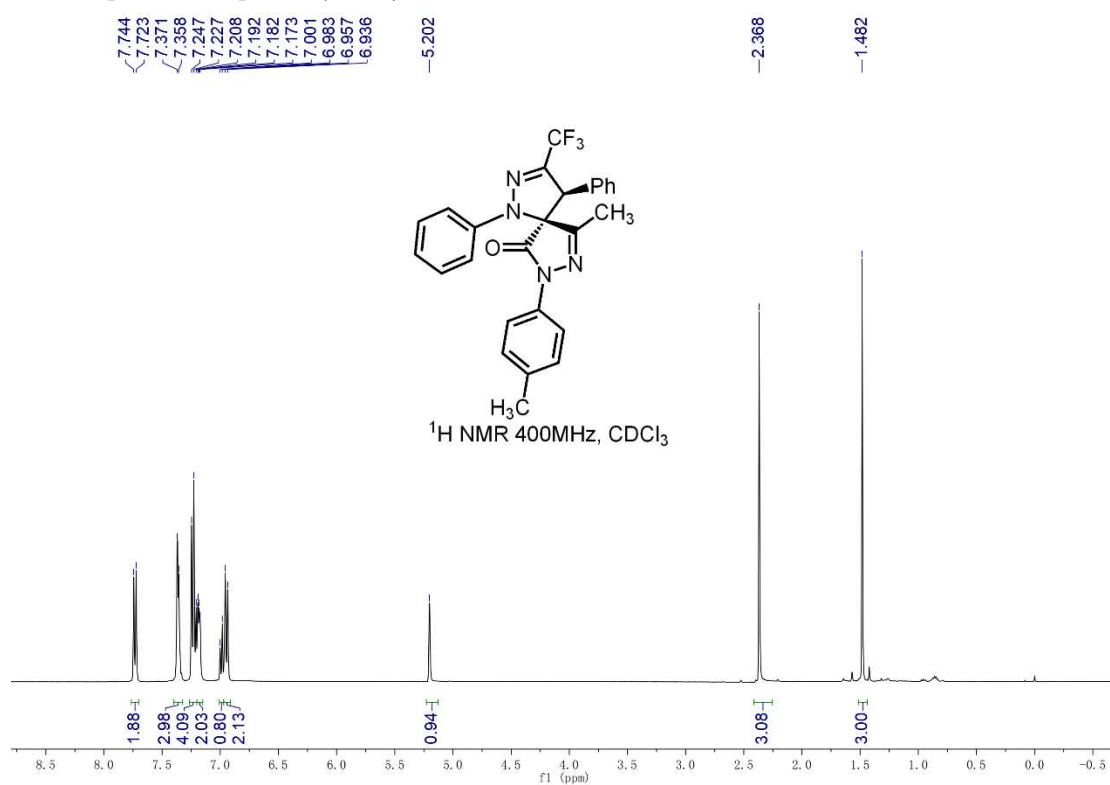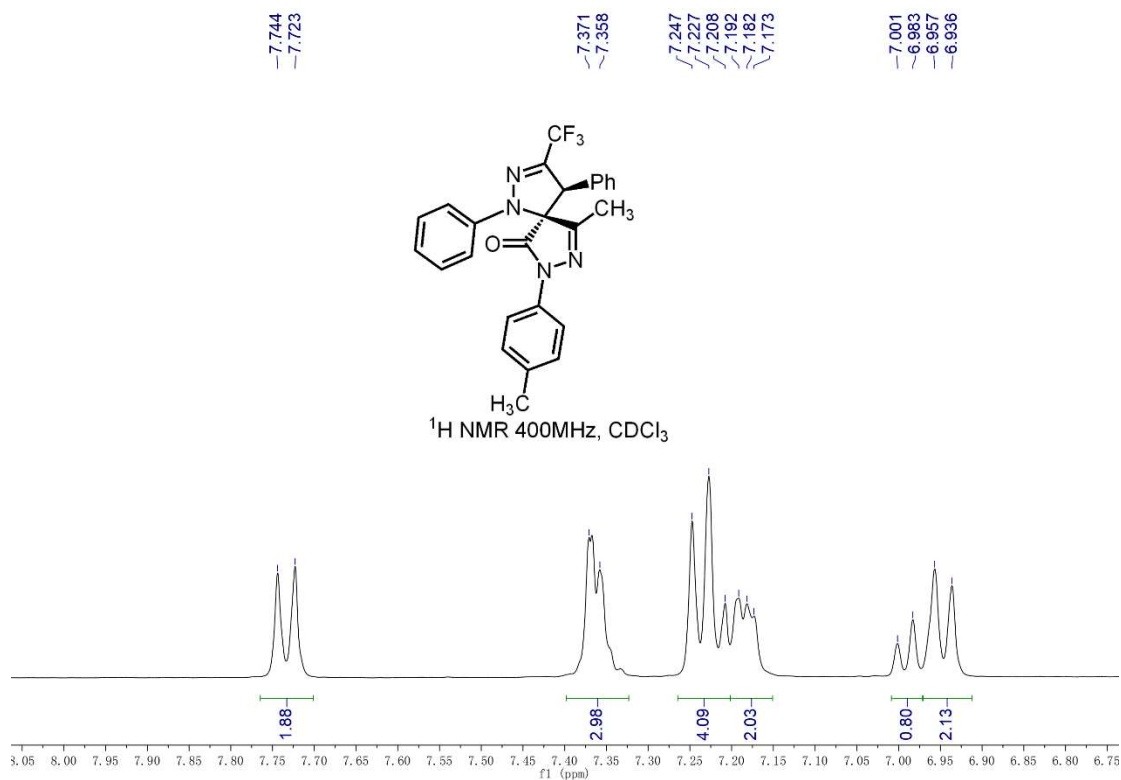



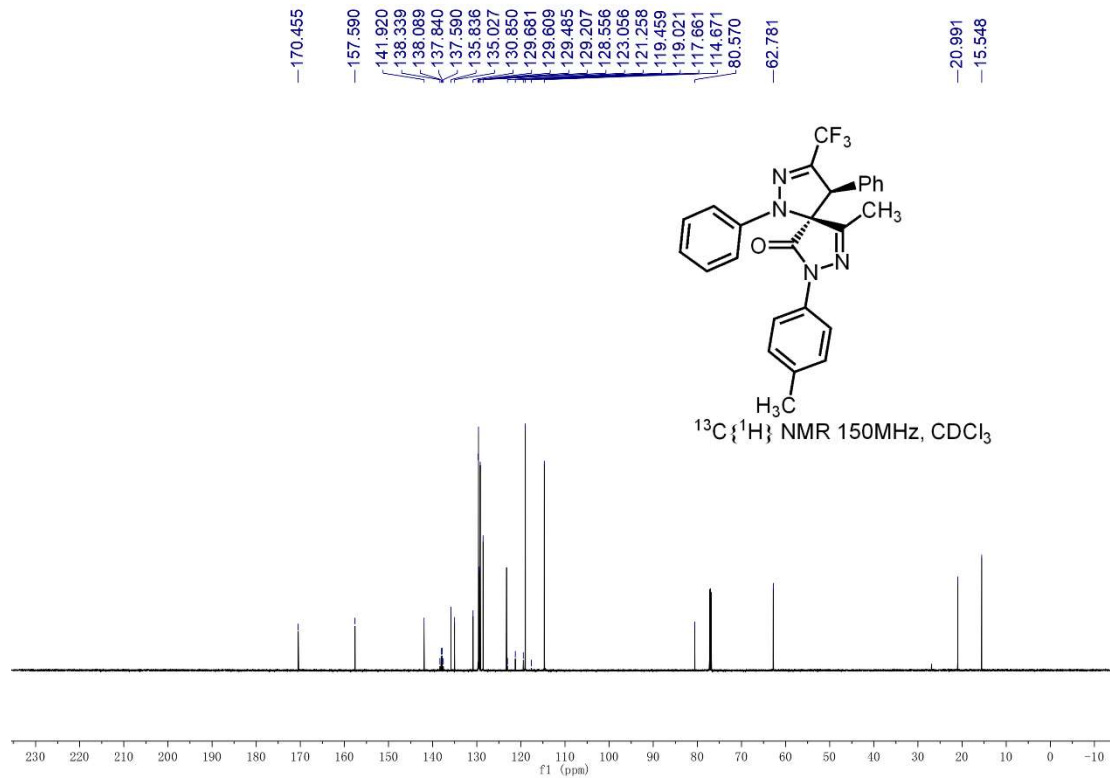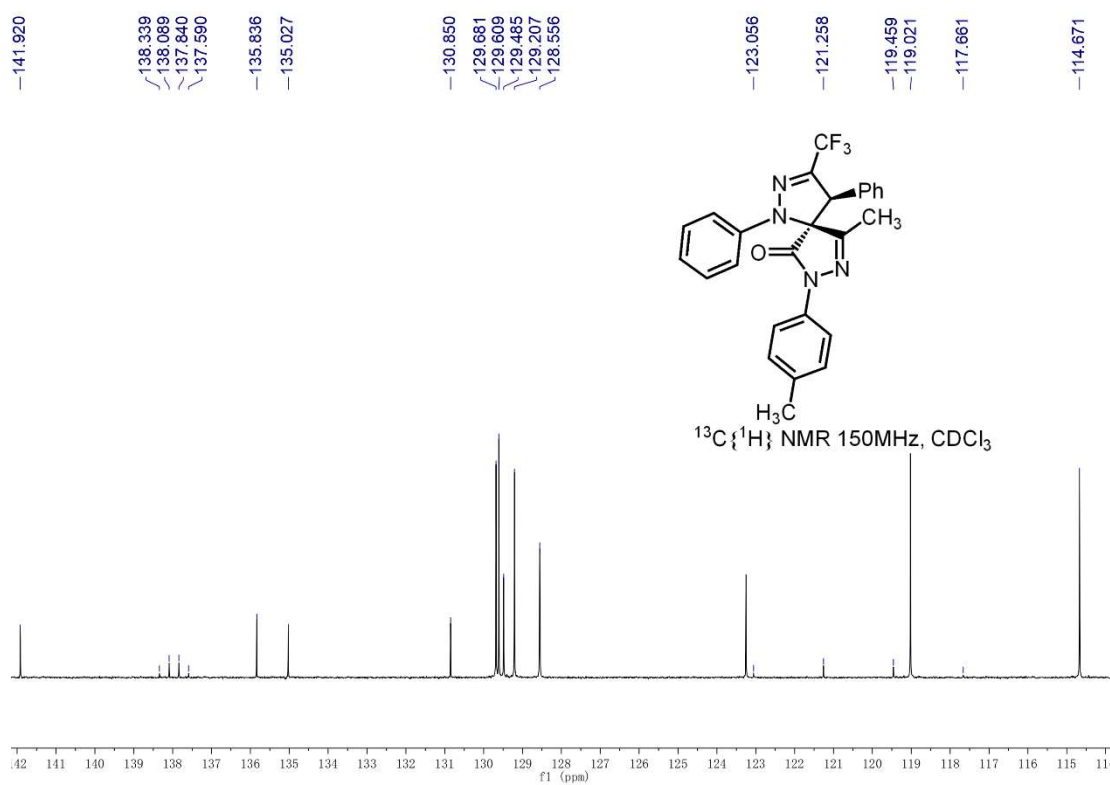

--61.552

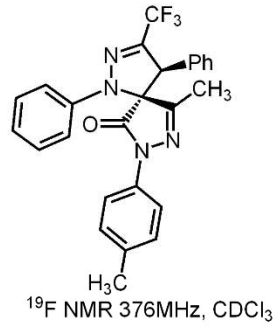

HRMS (ESI) copy of compound (*trans*)-6i:

### Mass Spectrum SmartFormula Report

#### Analysis Info

Analysis Name D:\Data\user\NWNNU-fengyang 20230322-15.d  
Method tune\_low.m  
Sample Name A-46  
Comment

Acquisition Date 2023-3-22 10:09:32  
Operator BDAL@DE  
Instrument / Ser# micrOTOF-Q 20453

#### Acquisition Parameter

|             |          |                       |           |                  |           |
|-------------|----------|-----------------------|-----------|------------------|-----------|
| Source Type | ESI      | Ion Polarity          | Positive  | Set Nebulizer    | 0.4 Bar   |
| Focus       | Active   | Set Capillary         | 4500 V    | Set Dry Heater   | 180 j°C   |
| Scan Begin  | 50 m/z   | Set End Plate Offset  | -500 V    | Set Dry Gas      | 4.0 l/min |
| Scan End    | 1000 m/z | Set Collision Cell RF | 400.0 Vpp | Set Divert Valve | Waste     |

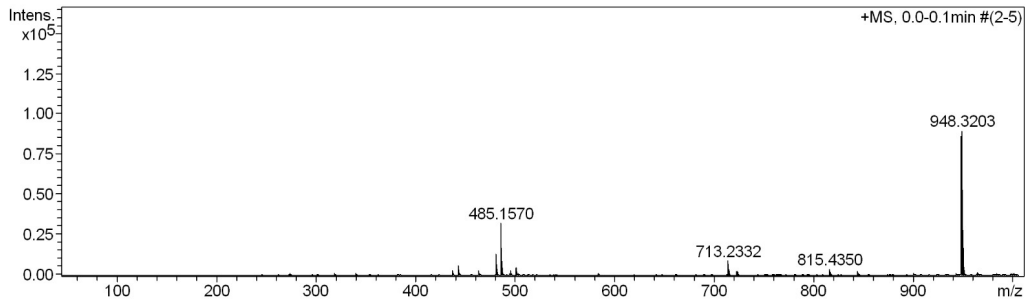

| Meas. #  | Formula                                                             | m/z      | err [ppm] | Me an err [ppm] | rdb  | N-R | e j % | Conf | m Sig | Std l | St d Me an m/z | St d Va rN or m | St d m/ z | St d Dif f | Std Com b Dev |
|----------|---------------------------------------------------------------------|----------|-----------|-----------------|------|-----|-------|------|-------|-------|----------------|-----------------|-----------|------------|---------------|
| 485.1570 | 1 C <sub>26</sub> H <sub>21</sub> F <sub>3</sub> N <sub>4</sub> NaO | 485.1560 | -2.1      | -1.8            | 16.5 | ok  | even  | 8.6  | 11.2  | 0.9   | 5.6            | 0.7             | 842.7     |            |               |

NMR copies of compound (*cis*)-**6i**:

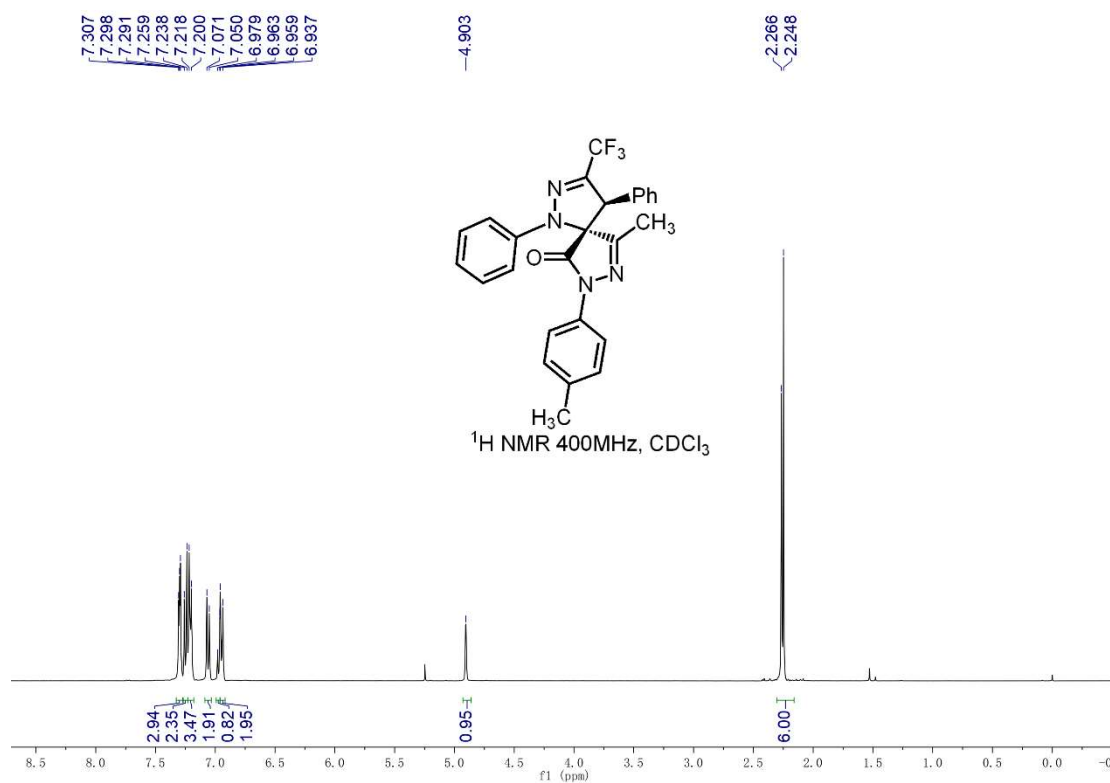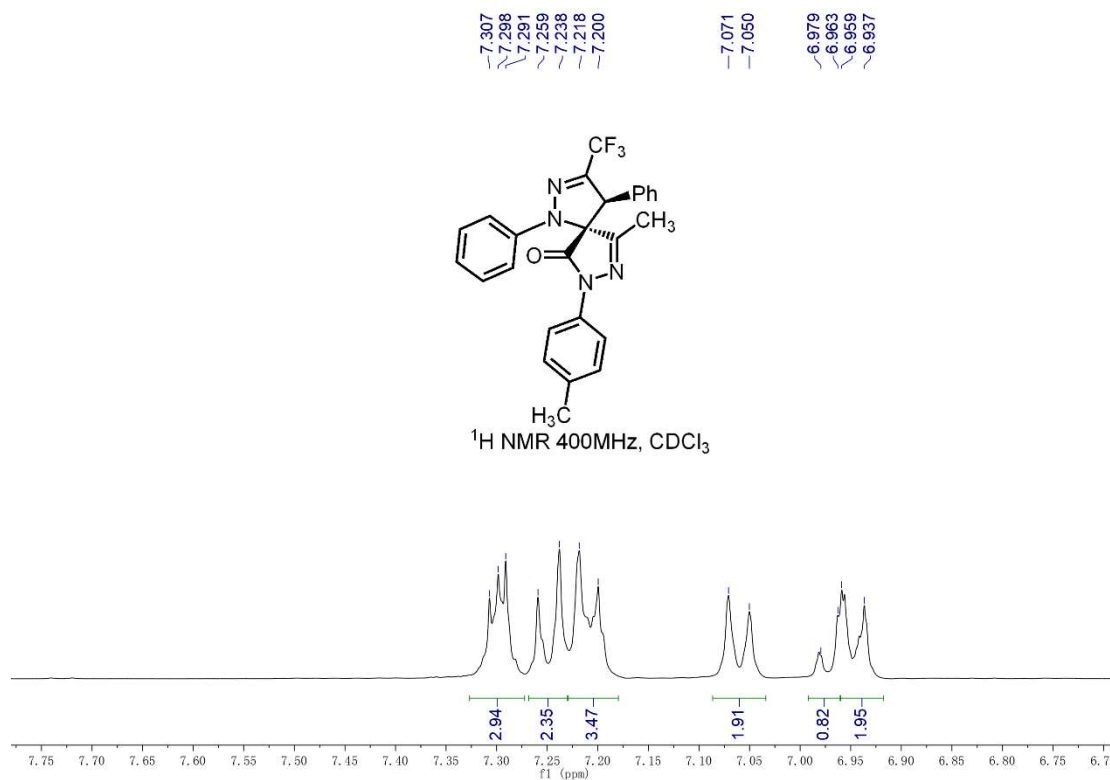

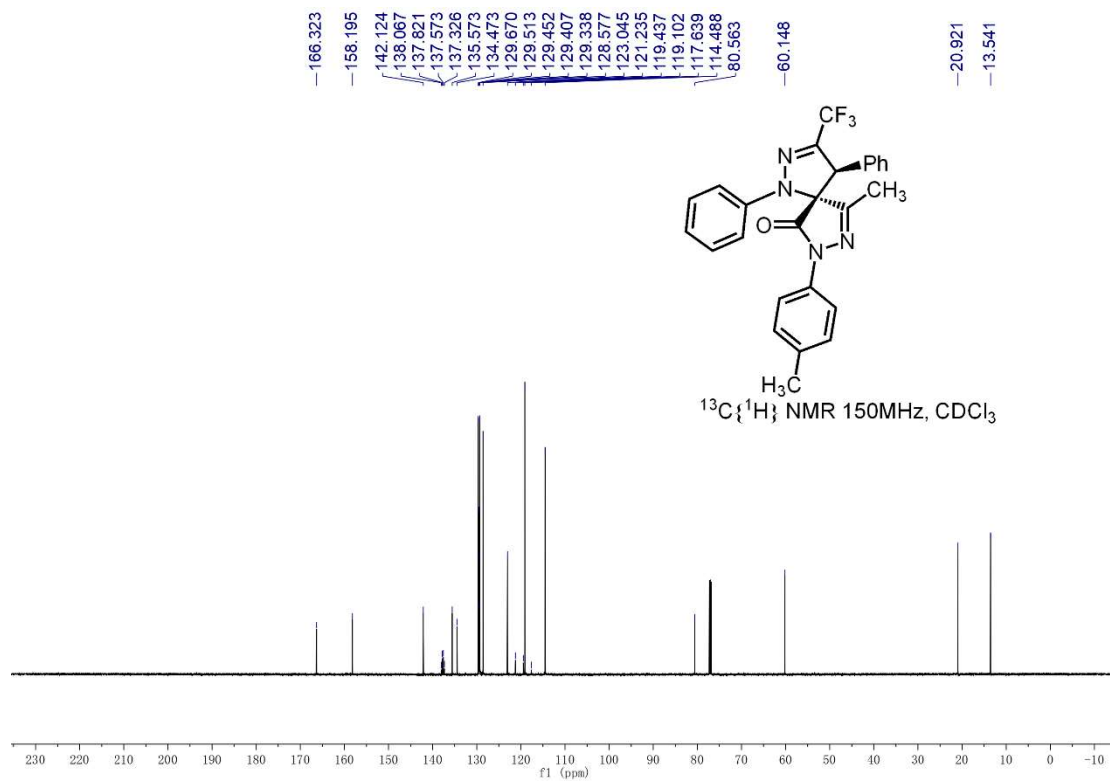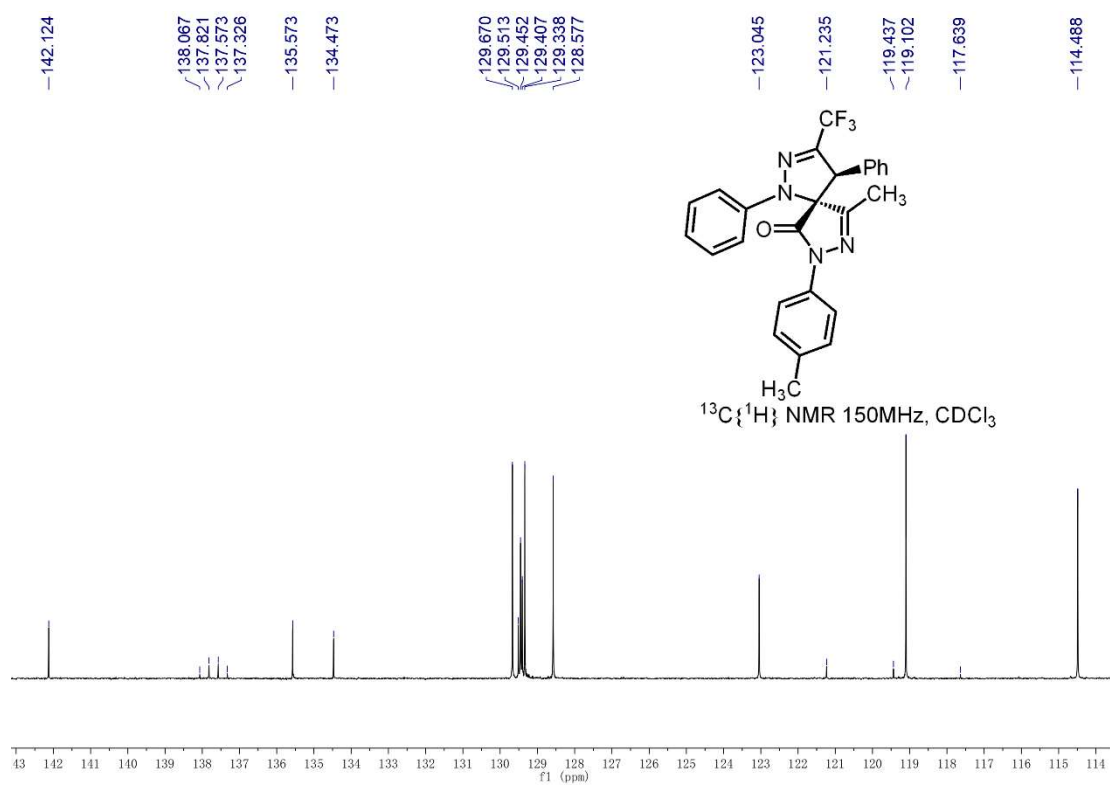

-62.033

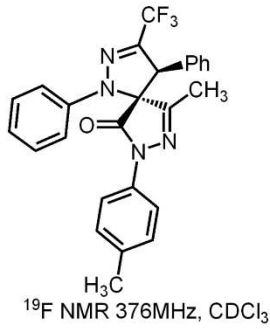

HRMS (ESI) copy of compound (*cis*)-6i:

### Mass Spectrum SmartFormula Report

#### Analysis Info

Analysis Name D:\Data\user\NWNNU-fengyang 20230322-16.d  
Method tune\_low.m  
Sample Name A-461  
Comment

Acquisition Date 2023-3-22 10:11:44

Operator BDAL@DE  
Instrument / Ser# micrOTOF-Q 20453

#### Acquisition Parameter

Source Type ESI  
Focus Active  
Scan Begin 50 m/z  
Scan End 1000 m/z  
Ion Polarity Positive  
Set Capillary 4500 V  
Set End Plate Offset -500 V  
Set Collision Cell RF 400.0 Vpp

Set Nebulizer 0.4 Bar  
Set Dry Heater 180 j°C  
Set Dry Gas 4.0 l/min  
Set Divert Valve Waste

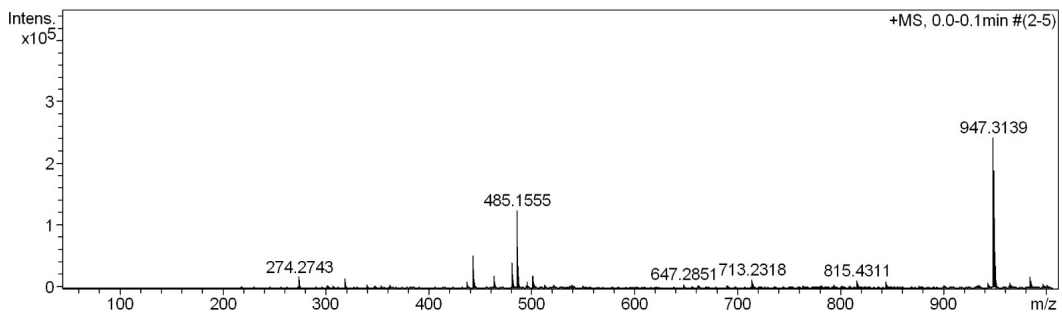

| Meas. #  | Formula                                                             | m/z      | err [ppm] | Mean err [ppm] | rdb  | N- R Conf | e <sub>i</sub> % | mS  | Std I | Std Me | Std I | Std m/ | Std rN | Std m/ | Std Com |
|----------|---------------------------------------------------------------------|----------|-----------|----------------|------|-----------|------------------|-----|-------|--------|-------|--------|--------|--------|---------|
| 485.1555 | 1 C <sub>26</sub> H <sub>21</sub> F <sub>3</sub> N <sub>4</sub> NaO | 485.1560 | 0.9       | 0.7            | 16.5 | ok        | even             | 8.8 | 11.6  | 0.4    | 5.6   | 0.5    | 842.7  |        |         |

NMR copies of compound (*trans*)-6j:

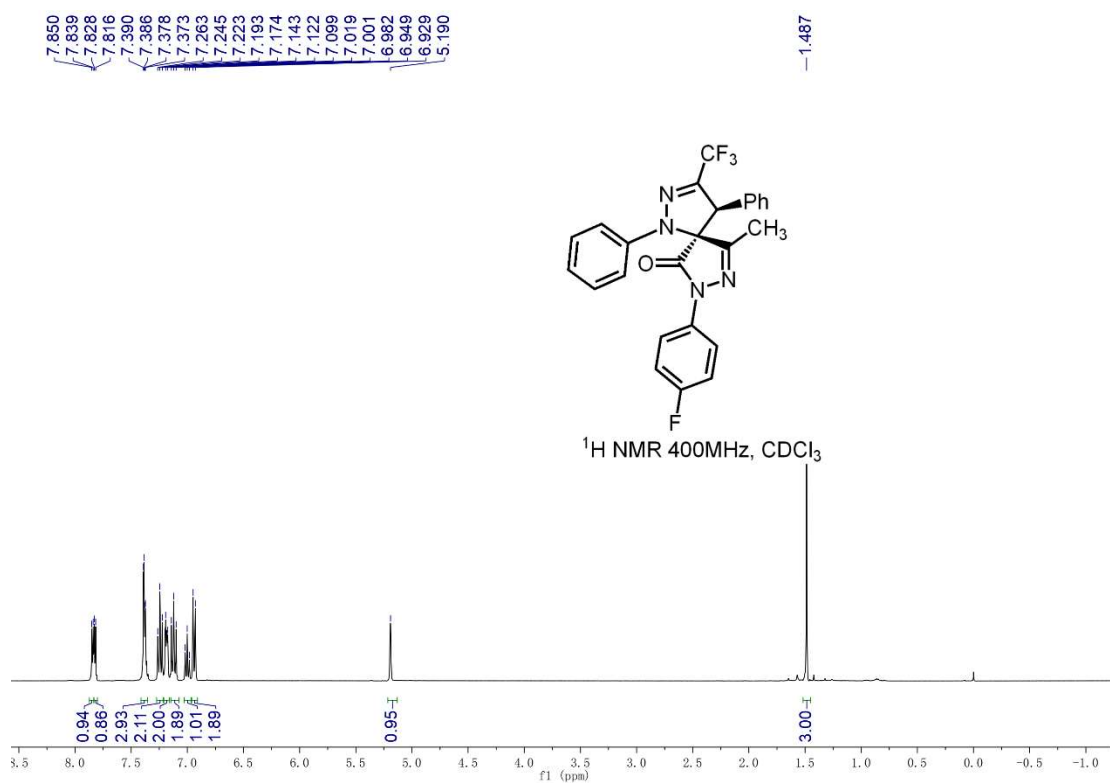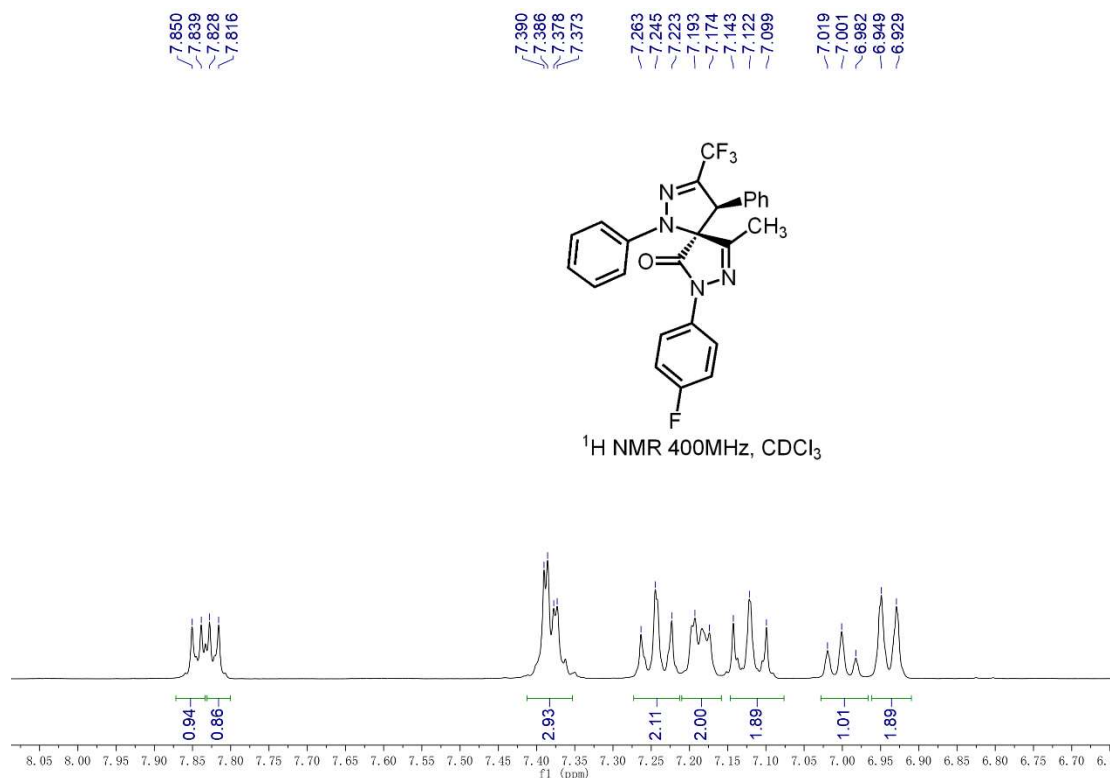

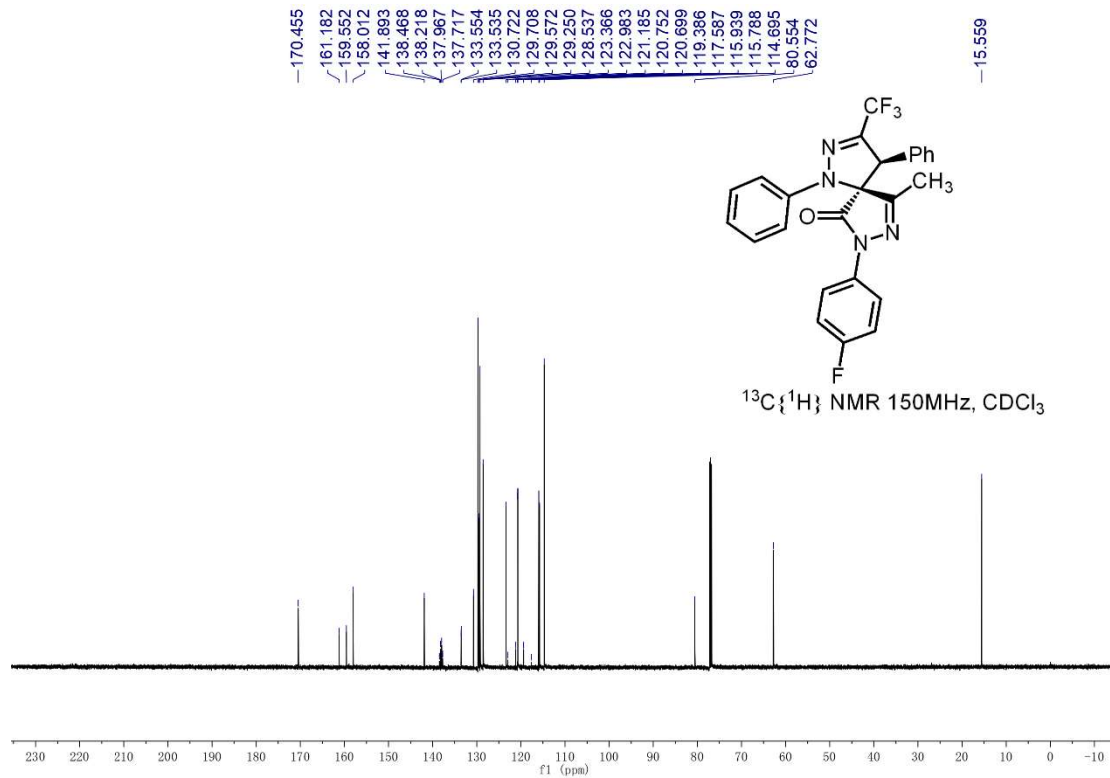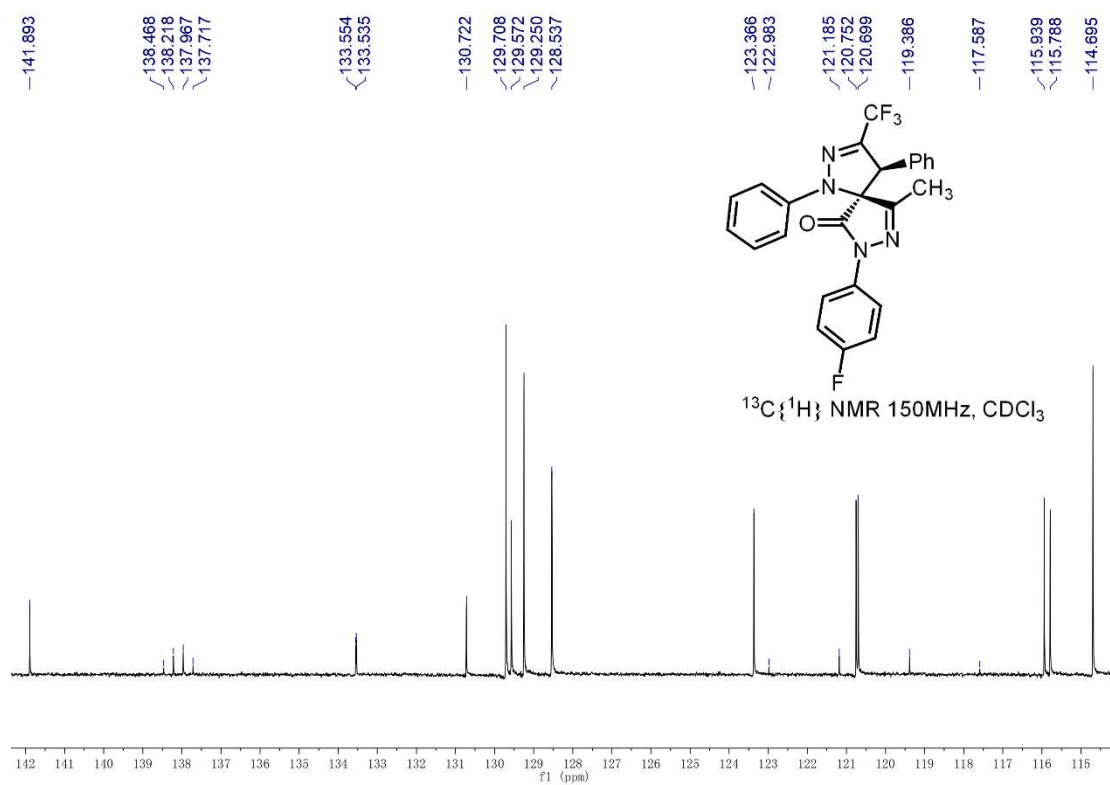

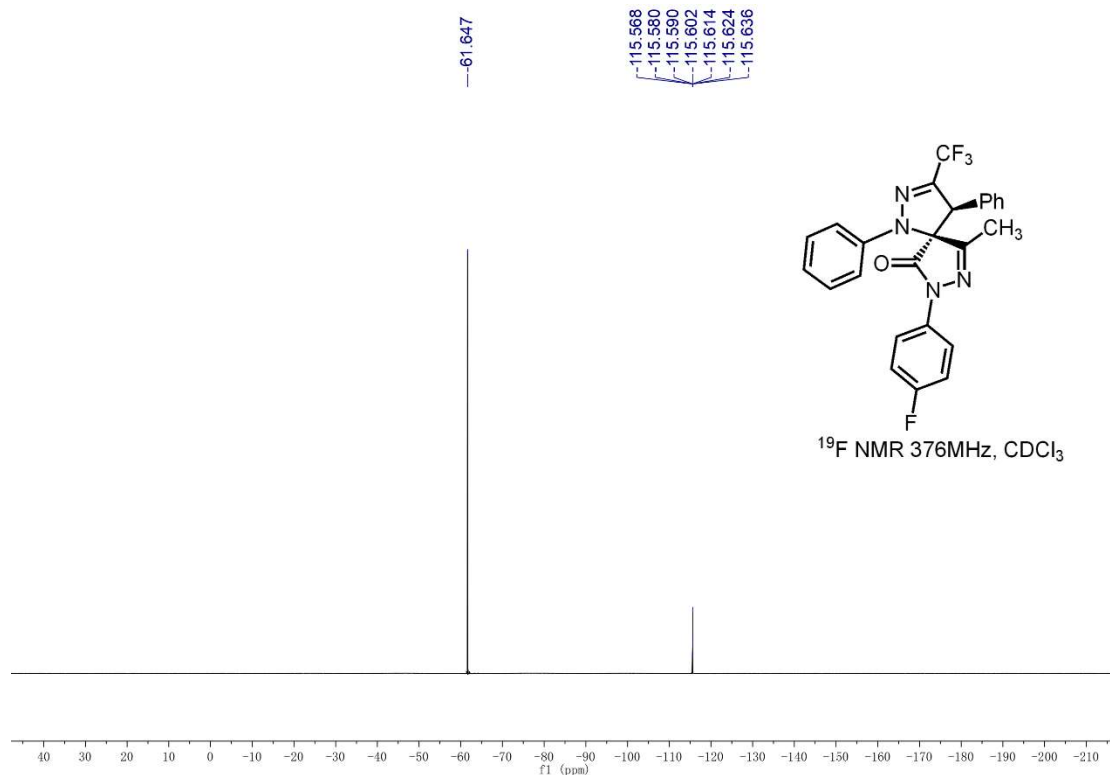

HRMS (ESI) copy of compound (*trans*)-6j:

### Mass Spectrum SmartFormula Report

**Analysis Info**

Analysis Name D:\Data\user\NWNNU-fengyang 20230322-17.d  
 Method tune\_low.m  
 Sample Name A-47  
 Comment

Acquisition Date 2023-3-22 10:13:53

Operator BDAL@DE  
 Instrument / Ser# micrOTOF-Q 20453

**Acquisition Parameter**

|             |          |                       |           |                  |           |
|-------------|----------|-----------------------|-----------|------------------|-----------|
| Source Type | ESI      | Ion Polarity          | Positive  | Set Nebulizer    | 0.4 Bar   |
| Focus       | Active   | Set Capillary         | 4500 V    | Set Dry Heater   | 180 j̄aC  |
| Scan Begin  | 50 m/z   | Set End Plate Offset  | -500 V    | Set Dry Gas      | 4.0 l/min |
| Scan End    | 1000 m/z | Set Collision Cell RF | 400.0 Vpp | Set Divert Valve | Waste     |

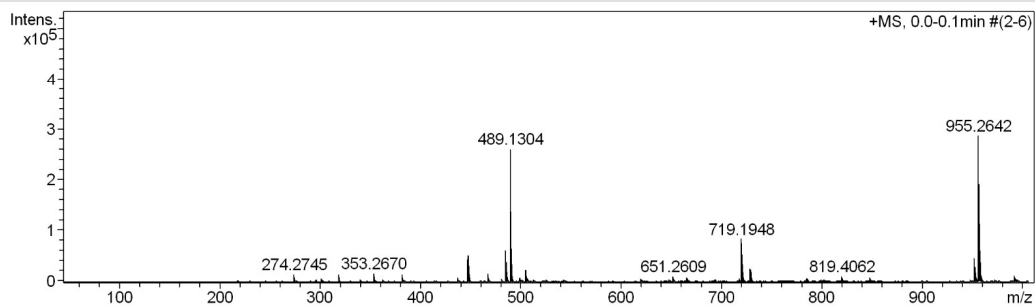

| Meas. #  | Formula                                                             | m/z      | err [ppm] | Me an err [ppm] | rdB  | N-R Conf | e <sub>i</sub> % | mSi gma | Std l | St d Me an z | Std Var Nor m | St d m/ z Dif f | Std Com b Dev |
|----------|---------------------------------------------------------------------|----------|-----------|-----------------|------|----------|------------------|---------|-------|--------------|---------------|-----------------|---------------|
| 489.1304 | 1 C <sub>25</sub> H <sub>18</sub> F <sub>4</sub> N <sub>4</sub> NaO | 489.1309 | 1.1       | 0.8             | 16.5 | ok       | even             | 22.8    | 33.5  | 0.5          | 14.3          | 0.8             | 842.7         |



NMR copies of compound (*cis*)-**6j**:

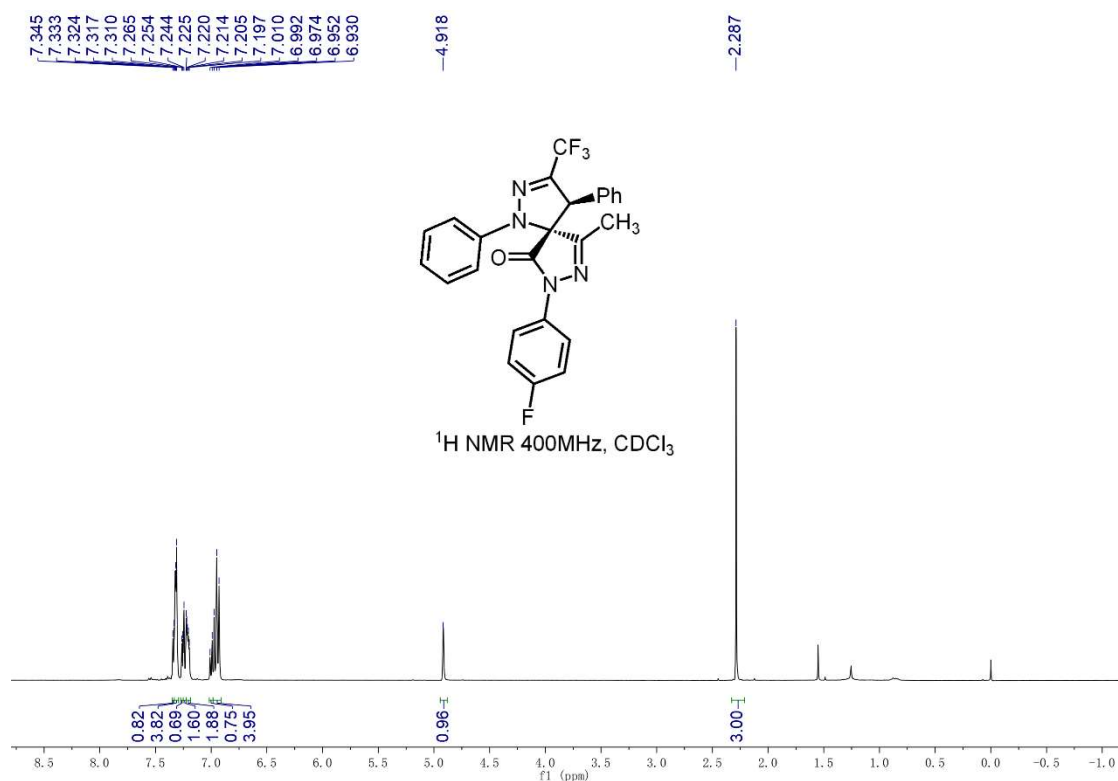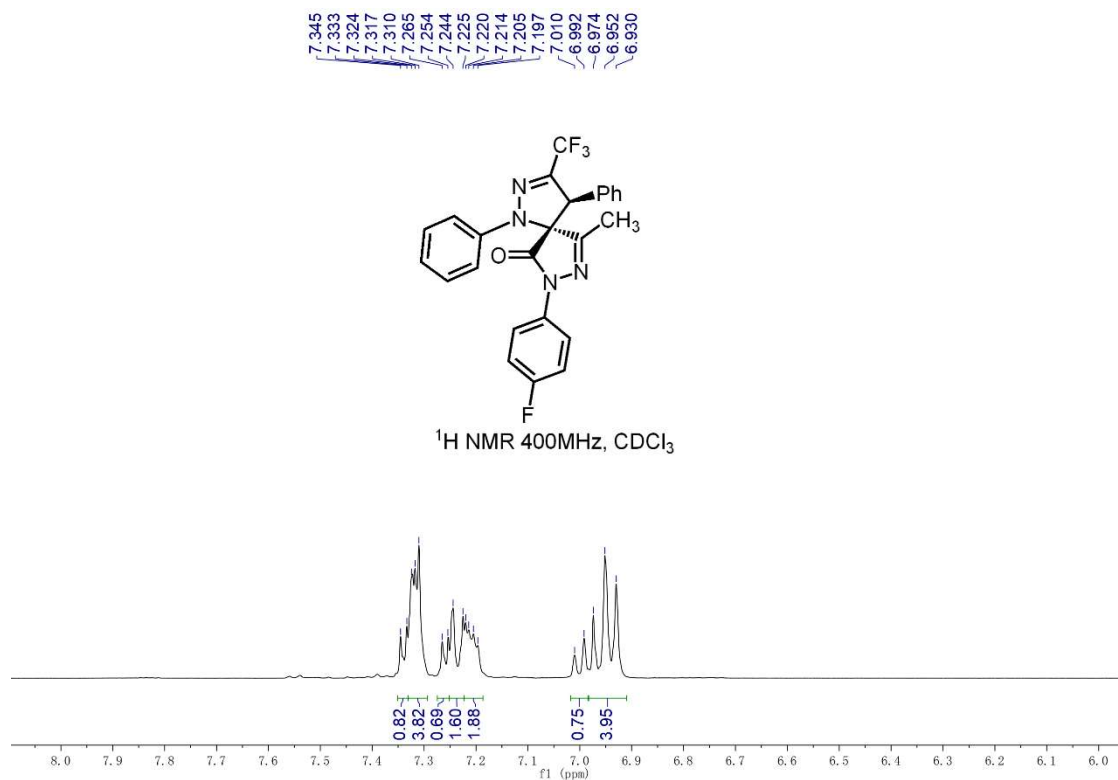

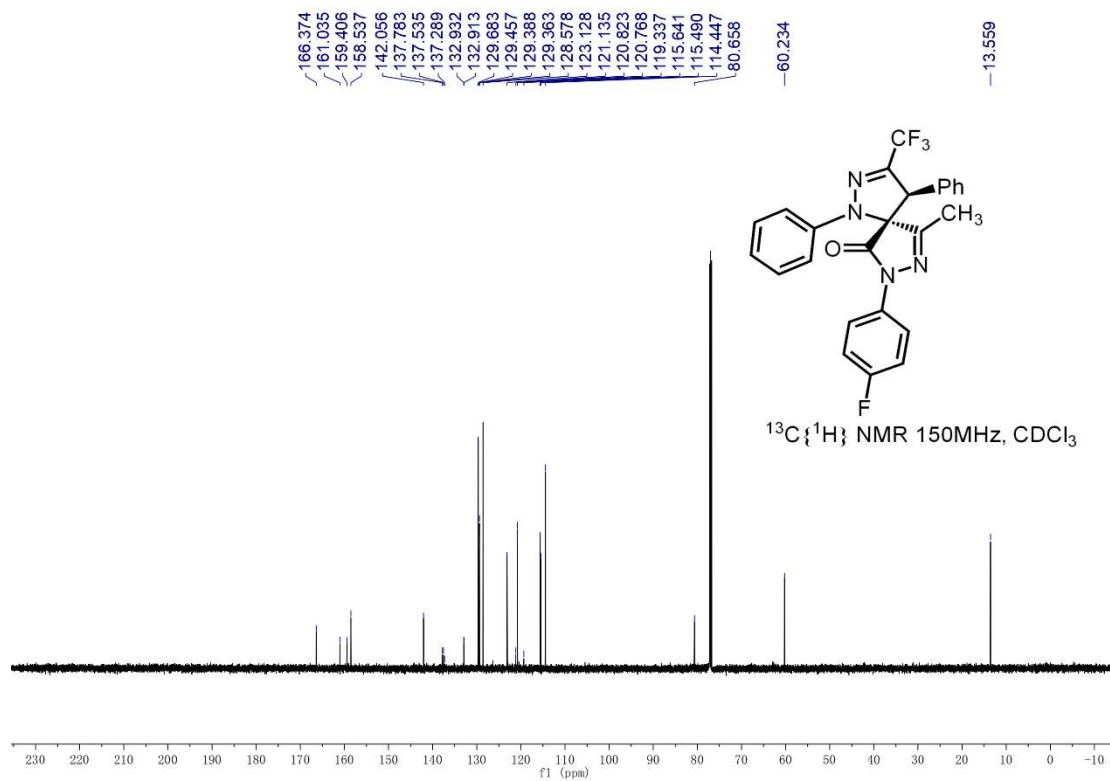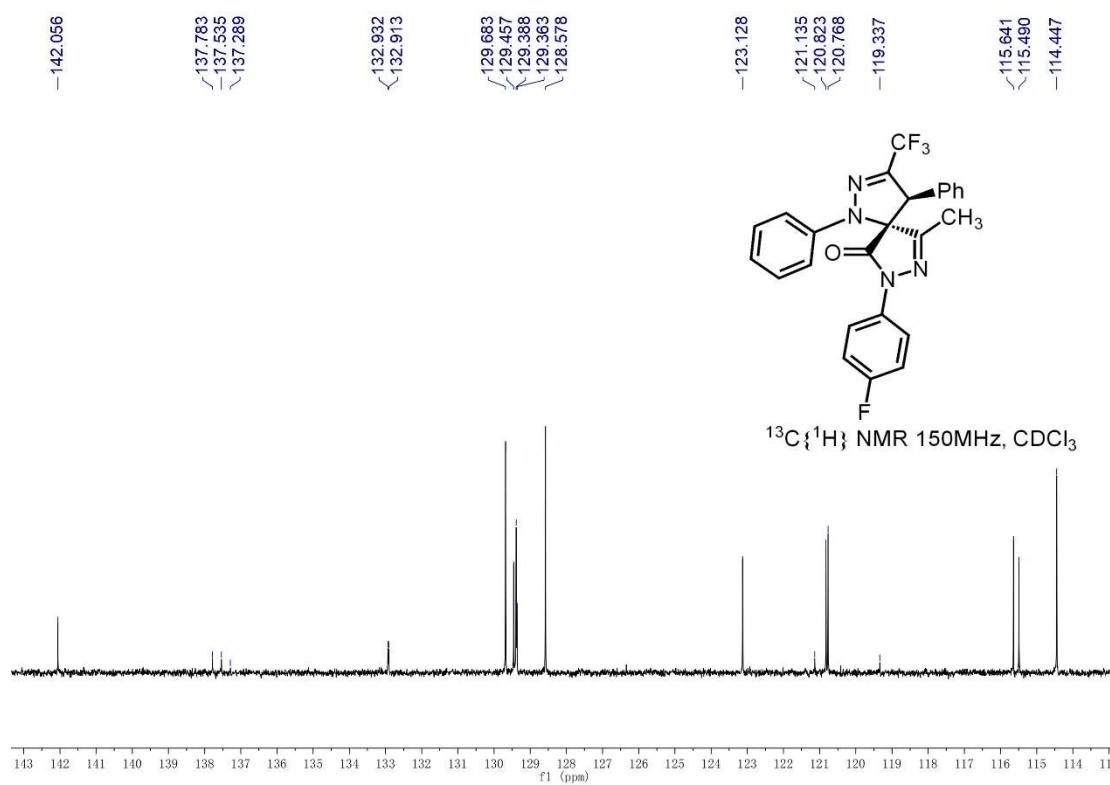

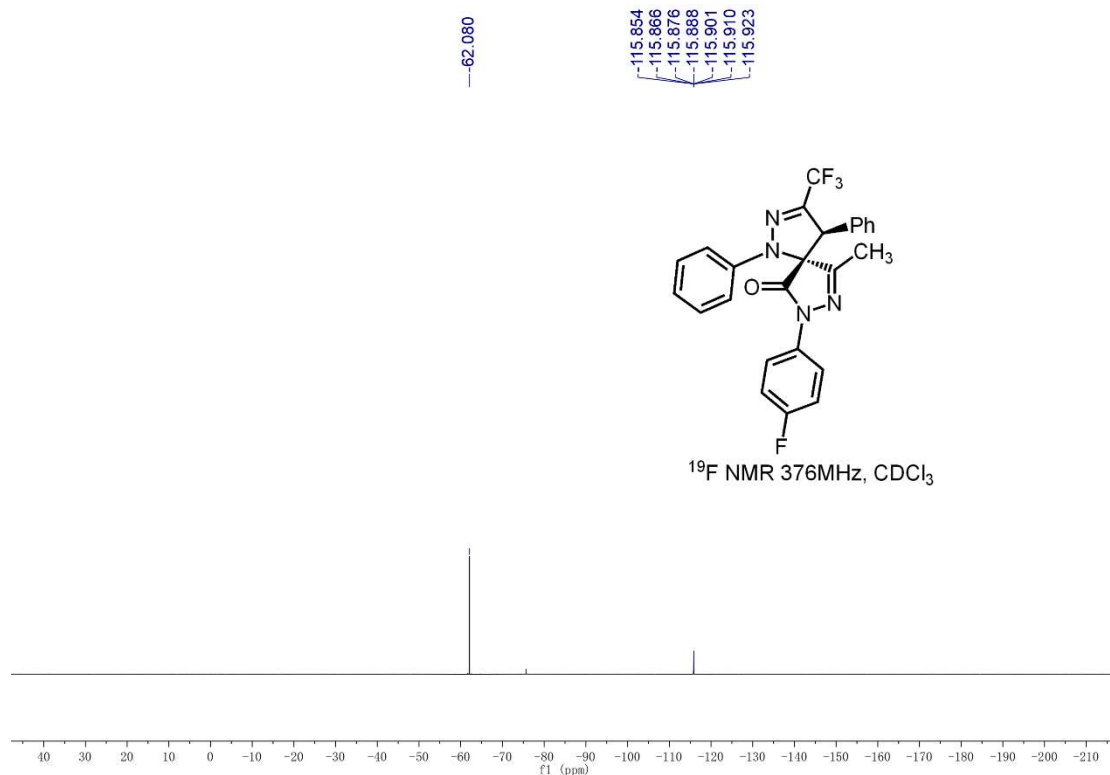

HRMS (ESI) copy of compound (*cis*)-6j:

### Mass Spectrum SmartFormula Report

**Analysis Info**

Analysis Name D:\Data\user\NWNNU-fengyang 20230322-18.d  
 Method tune\_low.m  
 Sample Name A-471  
 Comment

Acquisition Date 2023-3-22 10:15:51  
 Operator BDAL@DE  
 Instrument / Ser# micrOTOF-Q 20453

**Acquisition Parameter**

|             |          |                       |           |                  |           |
|-------------|----------|-----------------------|-----------|------------------|-----------|
| Source Type | ESI      | Ion Polarity          | Positive  | Set Nebulizer    | 0.4 Bar   |
| Focus       | Active   | Set Capillary         | 4500 V    | Set Dry Heater   | 180 j°C   |
| Scan Begin  | 50 m/z   | Set End Plate Offset  | -500 V    | Set Dry Gas      | 4.0 l/min |
| Scan End    | 1000 m/z | Set Collision Cell RF | 400.0 Vpp | Set Divert Valve | Waste     |

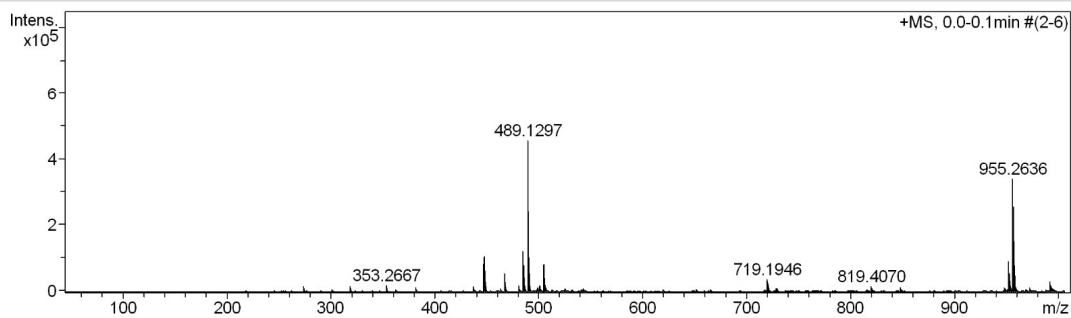

| Meas. #  | Formula                                                             | m/z      | err [ppm] | Me an err [ppm] | rdb  | N- R ul e | ej¥ Conf | mSi gma | Std l | St d Me an m/ z | Std l Var Nor m Dif f | St d m/ z | Std Com b Dev |
|----------|---------------------------------------------------------------------|----------|-----------|-----------------|------|-----------|----------|---------|-------|-----------------|-----------------------|-----------|---------------|
| 489.1297 | 1 C <sub>25</sub> H <sub>18</sub> F <sub>4</sub> N <sub>4</sub> NaO | 489.1309 | 2.4       | 1.7             | 16.5 | ok        | even     | 35.8    | 54.4  | 1.1             | 23.1                  | 2.0       | 842.7         |

NMR copies of compound (*trans*)-6k:

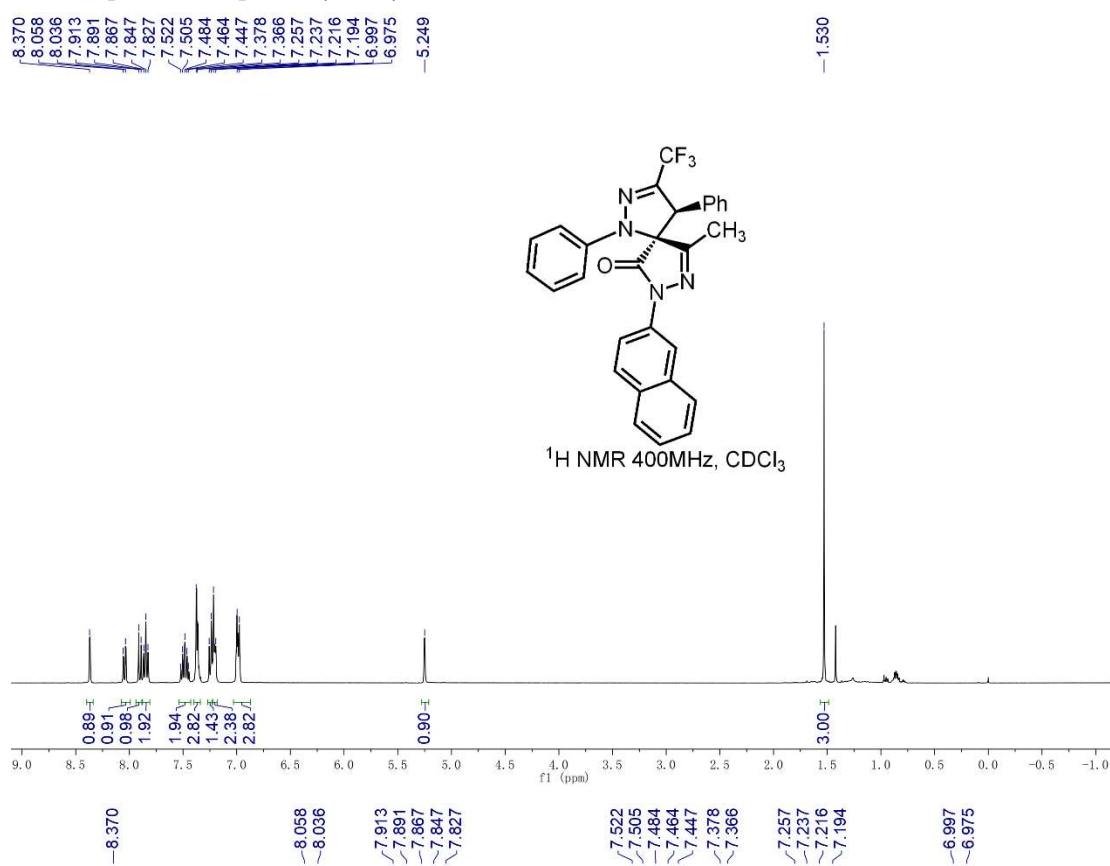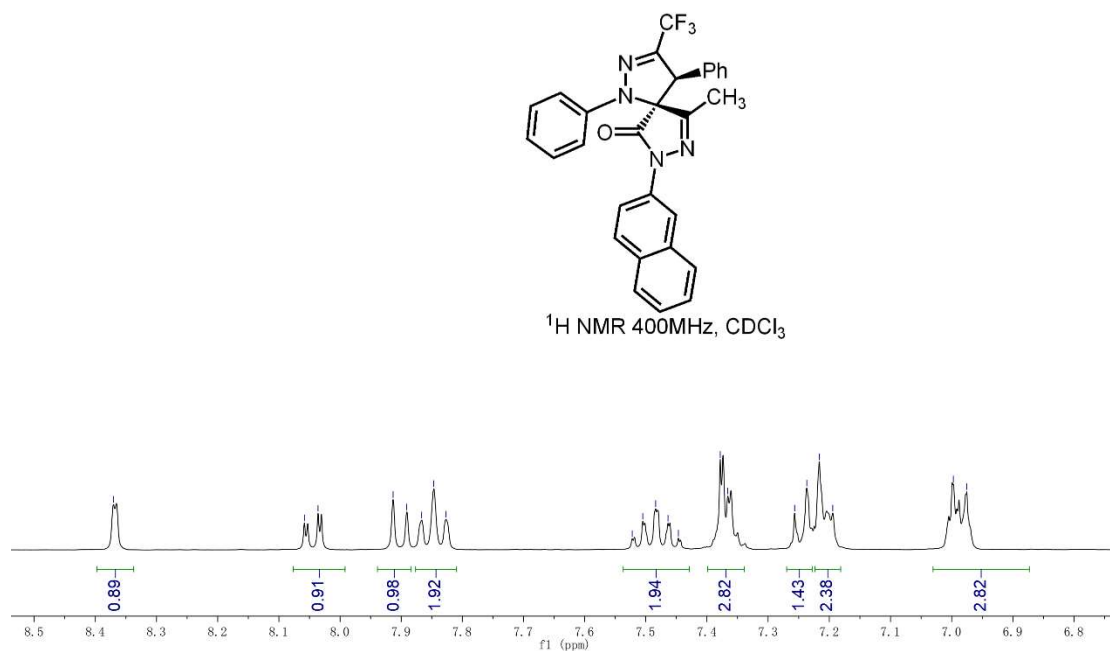

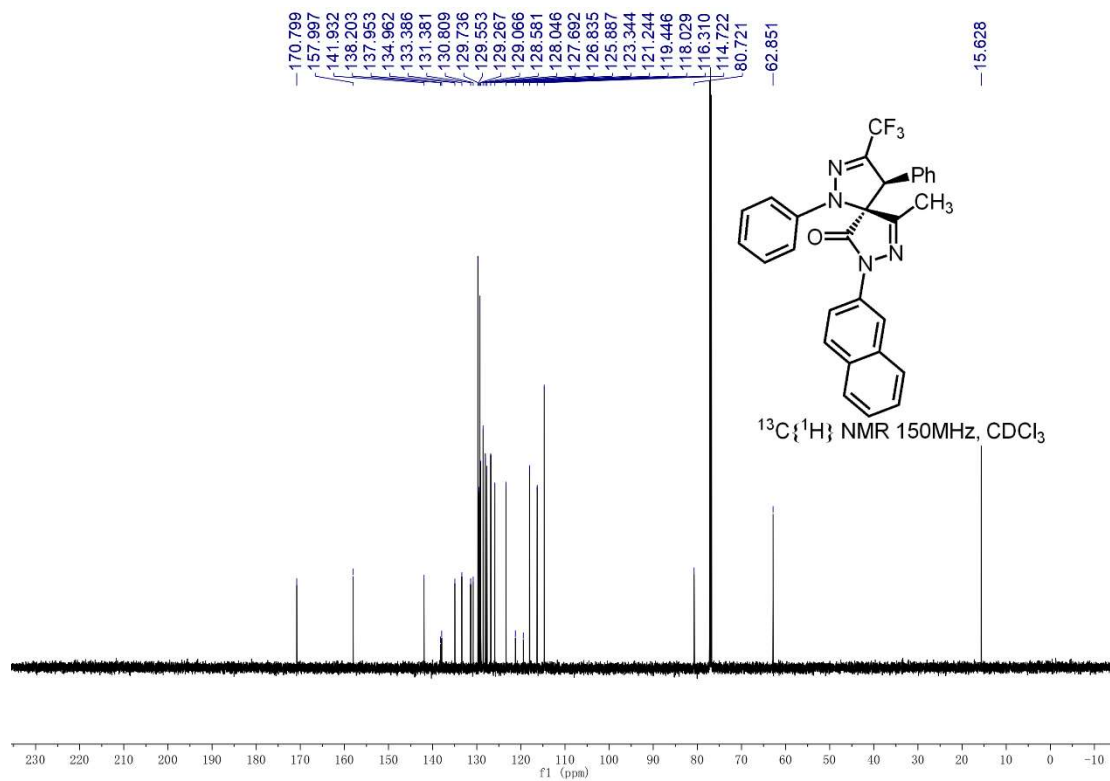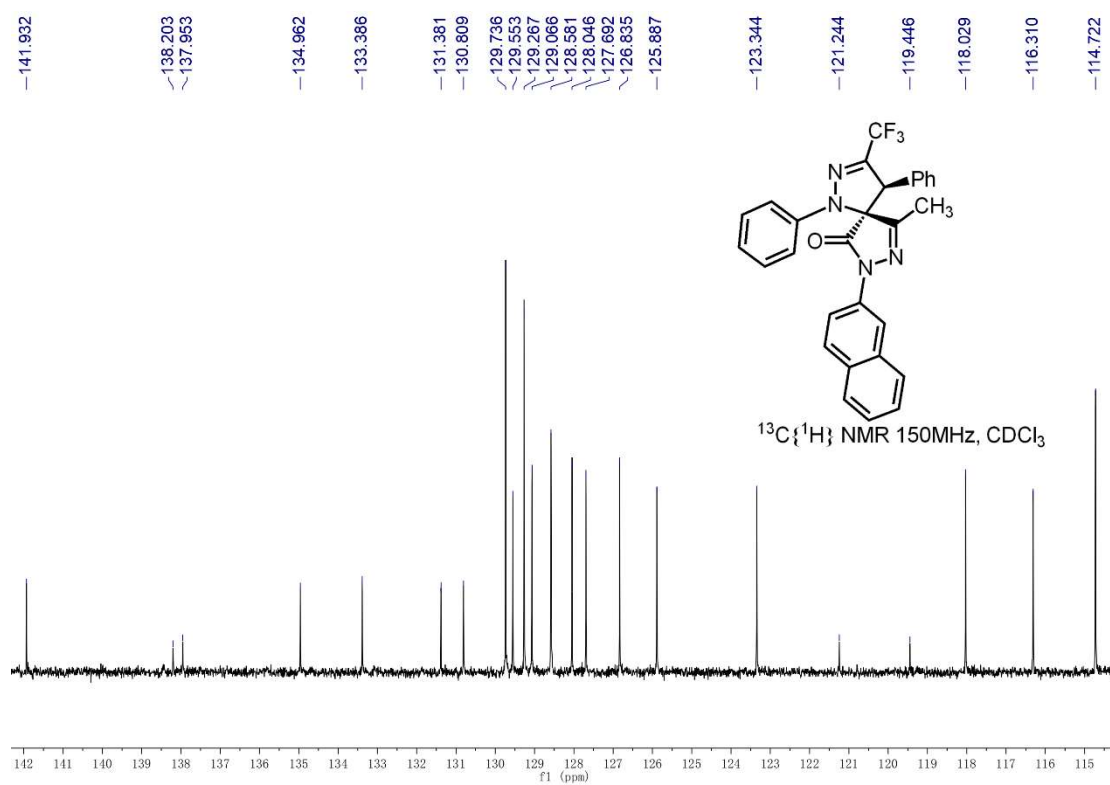

--61.565

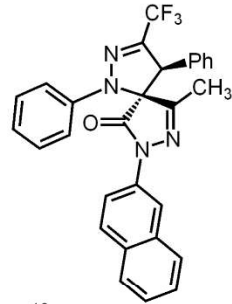

<sup>19</sup>F NMR 376MHz, CDCl<sub>3</sub>

HRMS (ESI) copy of compound (*trans*)-6k:

### Mass Spectrum SmartFormula Report

#### Analysis Info

Analysis Name D:\Data\user\NWNNU-fengyang 20230322-19.d  
Method tune\_low.m  
Sample Name A-59  
Comment

Acquisition Date 2023-3-22 10:19:17

Operator BDAL@DE  
Instrument / Ser# micrOTOF-Q 20453

#### Acquisition Parameter

Source Type ESI Ion Polarity Positive  
Focus Active Set Capillary 4500 V  
Scan Begin 50 m/z Set End Plate Offset -500 V  
Scan End 1000 m/z Set Collision Cell RF 400.0 Vpp

Set Nebulizer 0.4 Bar  
Set Dry Heater 180 j°C  
Set Dry Gas 4.0 l/min  
Set Divert Valve Waste

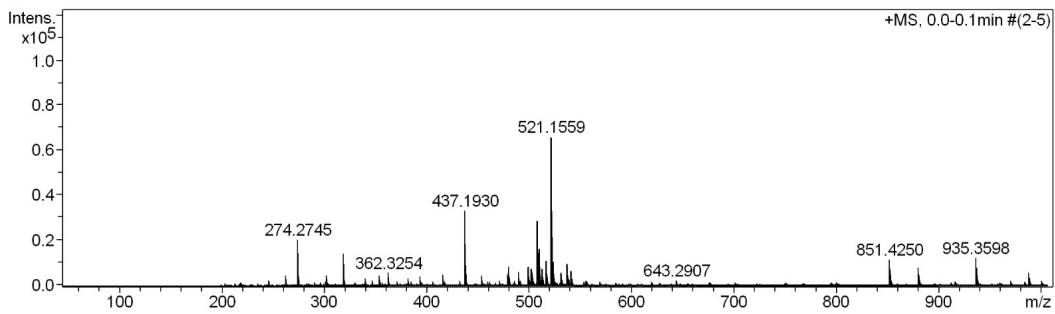

| Meas. #  | Formula                                                             | m/z      | err [ppm] | Me an err [ppm] | rdb  | N-R | e <sub>j</sub> Conf | mS    | Std | Std   | Std  | Std  | Std       |
|----------|---------------------------------------------------------------------|----------|-----------|-----------------|------|-----|---------------------|-------|-----|-------|------|------|-----------|
| m/z      |                                                                     |          |           |                 |      |     |                     | ig ma | l   | Me an | l Va | m/ z | Com b Dev |
| 521.1559 | 1 C <sub>29</sub> H <sub>21</sub> F <sub>3</sub> N <sub>4</sub> NaO | 521.1560 | 0.2       | 0.3             | 19.5 | ok  | even                | 6.0   | 9.5 | 0.6   | 5.0  | 1.6  | 842.7     |

NMR copies of compound (*cis*)-**6k**:

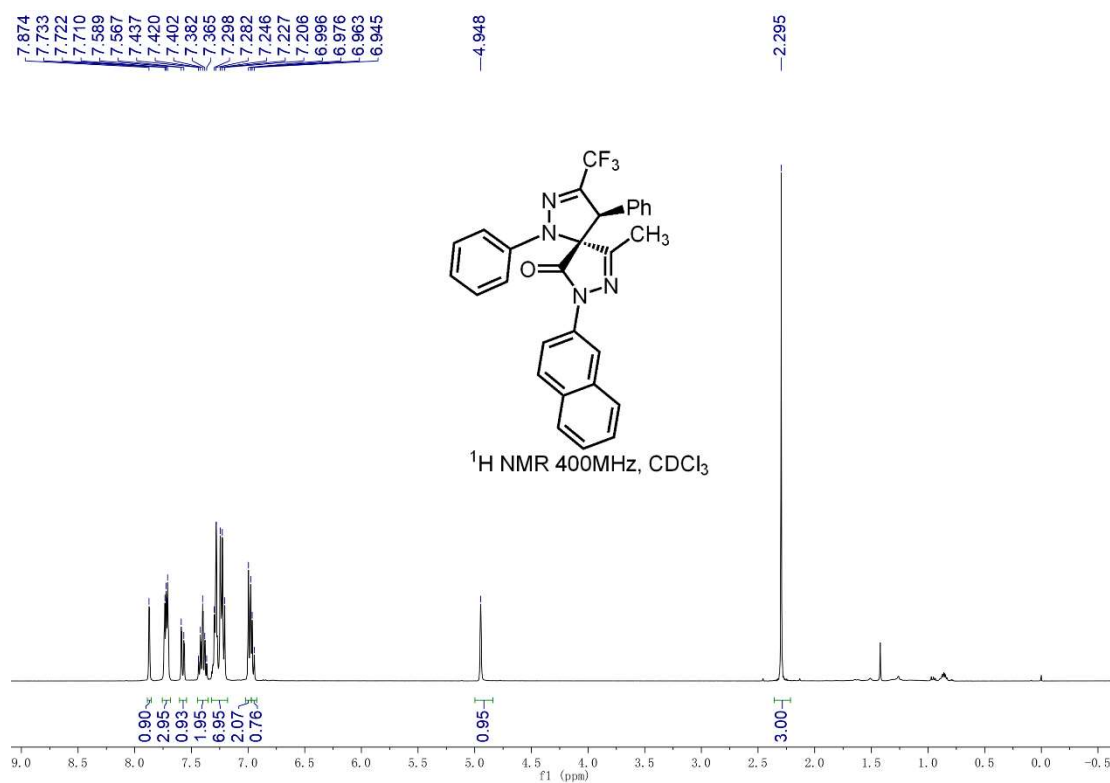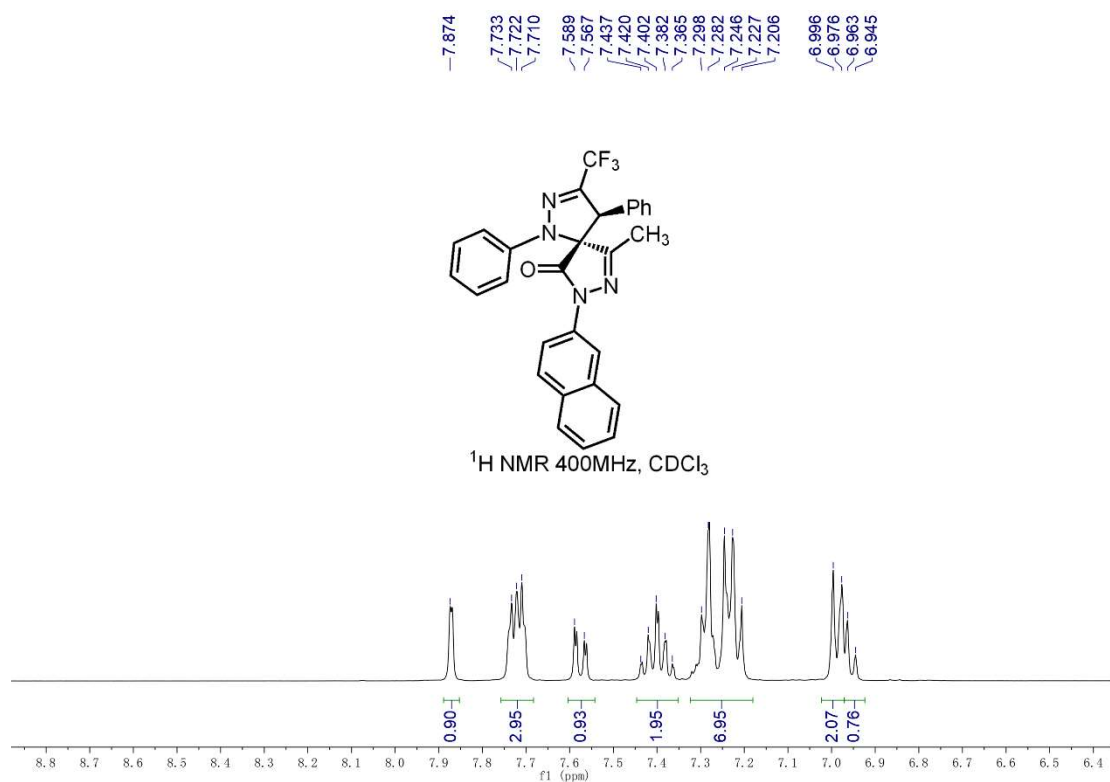

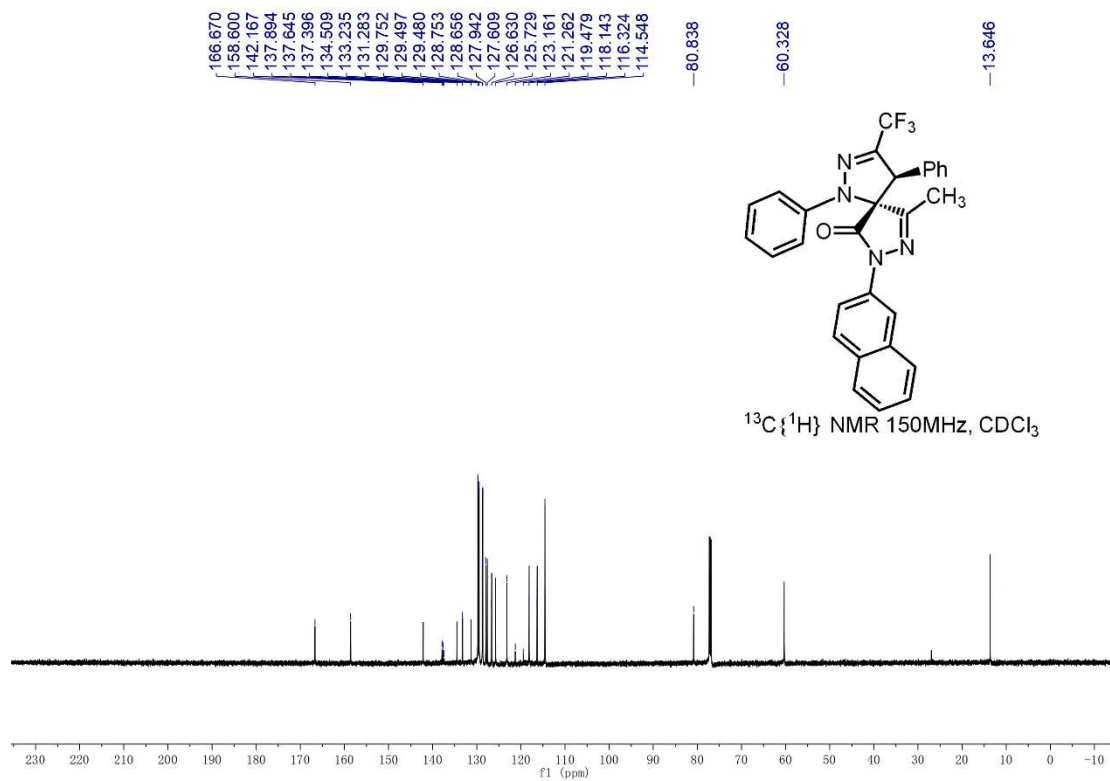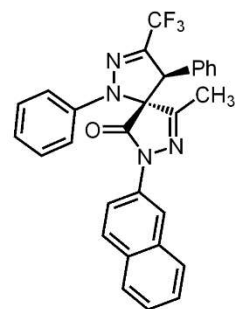

<sup>13</sup>C{<sup>1</sup>H} NMR 150MHz, CDCl<sub>3</sub>

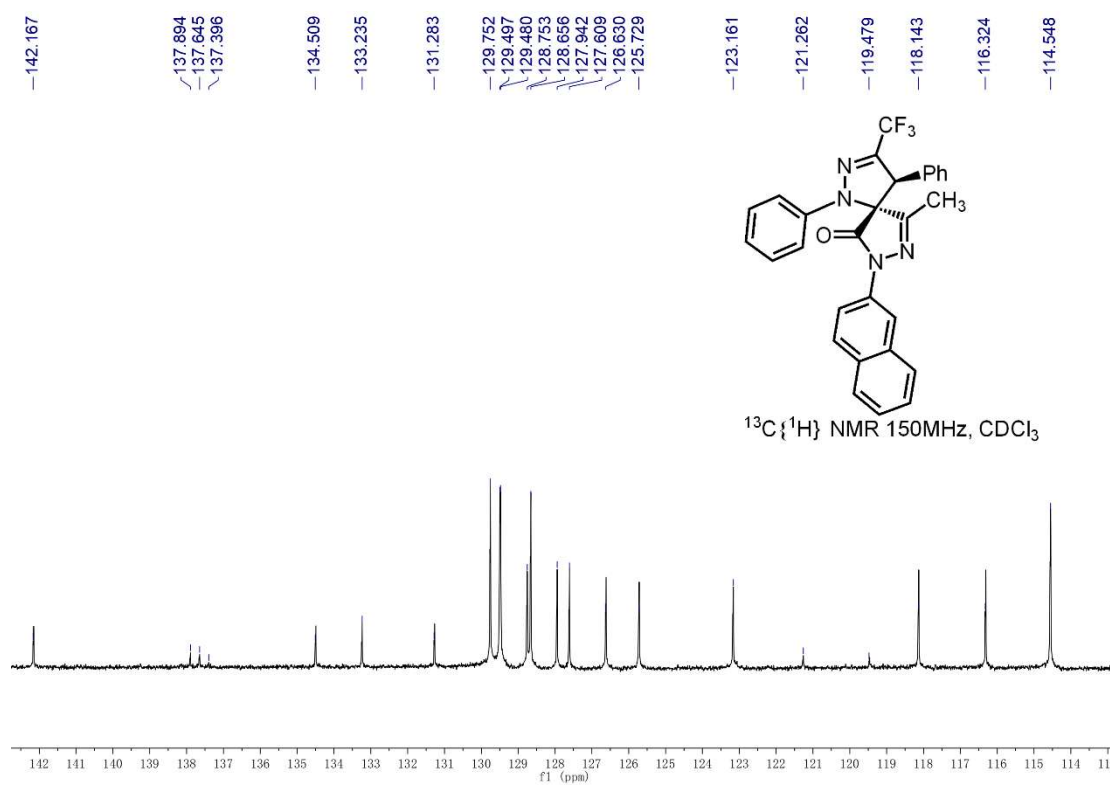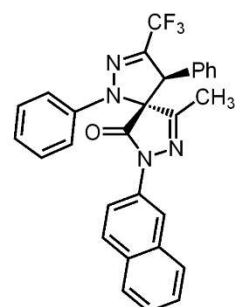

<sup>13</sup>C{<sup>1</sup>H} NMR 150MHz, CDCl<sub>3</sub>



-61.959

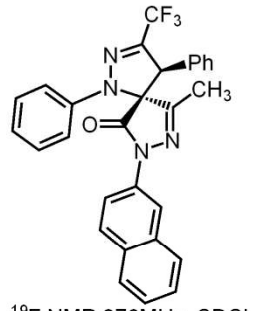

HRMS (ESI) copy of compound (*cis*)-**6k**:

### Mass Spectrum SmartFormula Report

#### Analysis Info

Analysis Name D:\Data\user\NWNW-fengyang 20230322-20.d  
Method tune\_low.m  
Sample Name A-591  
Comment

Acquisition Date 2023-3-22 10:21:29  
Operator BDAL@DE  
Instrument / Ser# micrOTOF-Q 20453

#### Acquisition Parameter

|             |          |                       |           |                  |                   |
|-------------|----------|-----------------------|-----------|------------------|-------------------|
| Source Type | ESI      | Ion Polarity          | Positive  | Set Nebulizer    | 0.4 Bar           |
| Focus       | Active   | Set Capillary         | 4500 V    | Set Dry Heater   | 180 $\mu\text{C}$ |
| Scan Begin  | 50 m/z   | Set End Plate Offset  | -500 V    | Set Dry Gas      | 4.0 l/min         |
| Scan End    | 1000 m/z | Set Collision Cell RF | 400.0 Vpp | Set Divert Valve | Waste             |

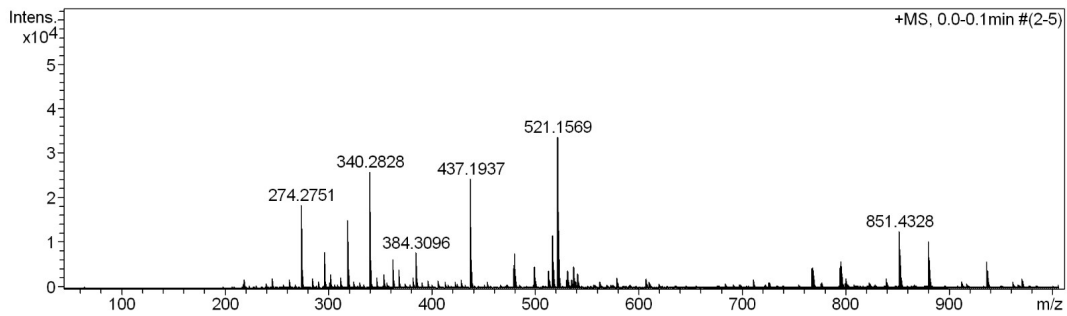

| Meas. #  | Formula                                                             | m/z      | err [ppm] | Me an err [ppm] | rdb  | N-R | e <sub>j</sub> Con | mSi gm a | Std l | St d Me an m/z | Std l Var m | Std l Nor m Dif | Std d Com b Dev |
|----------|---------------------------------------------------------------------|----------|-----------|-----------------|------|-----|--------------------|----------|-------|----------------|-------------|-----------------|-----------------|
| 521.1569 | 1 C <sub>29</sub> H <sub>21</sub> F <sub>3</sub> N <sub>4</sub> NaO | 521.1560 | -1.9      | -1.3            | 19.5 | ok  | even               | 25.0     | 39.3  | 0.9            | 12.5        | 1.2             | 842.7           |



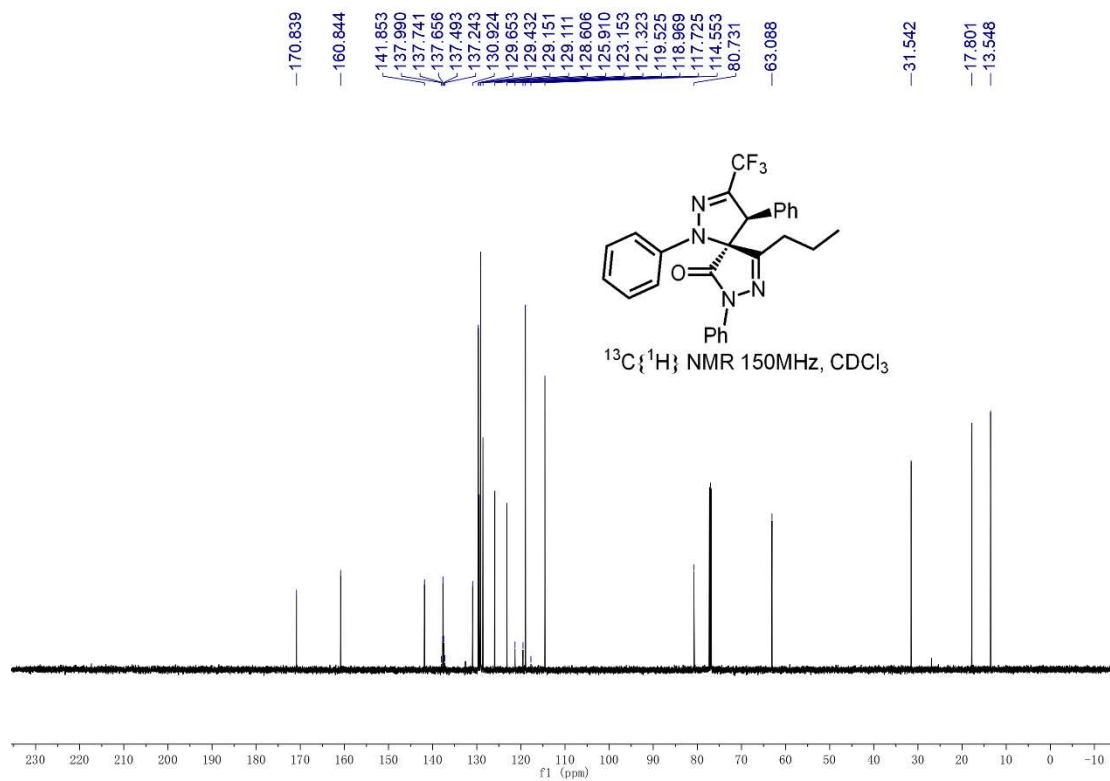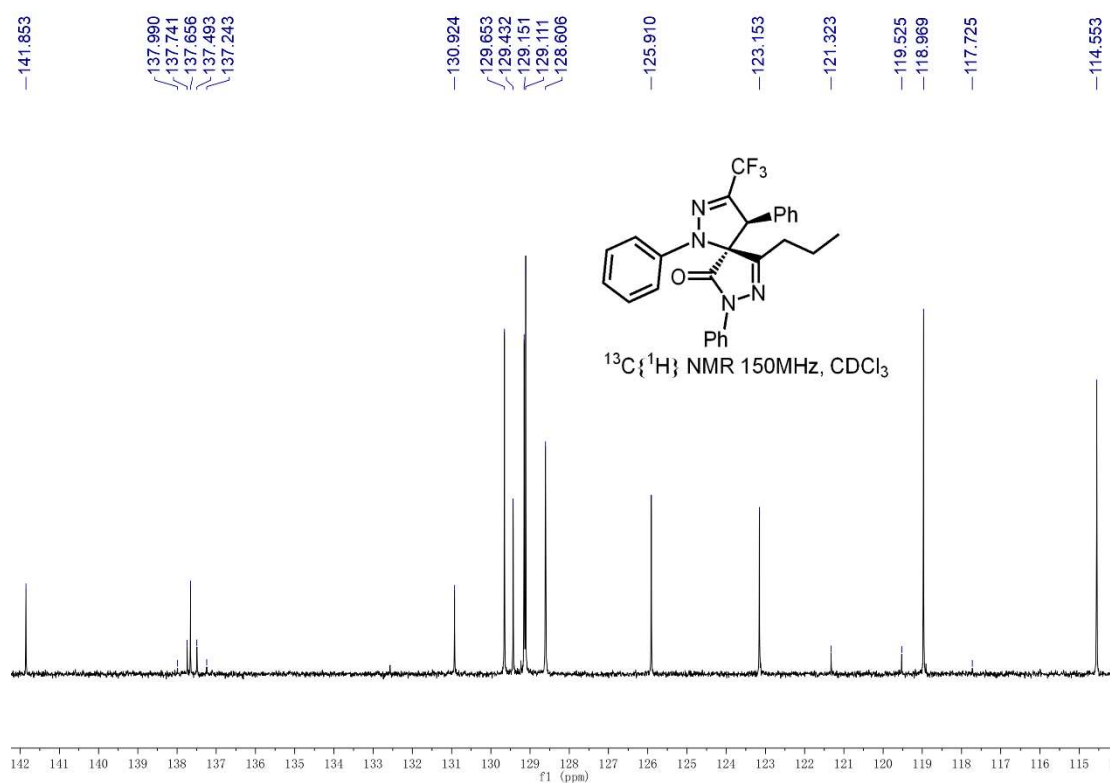

-61.364

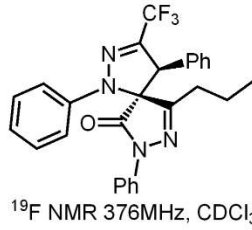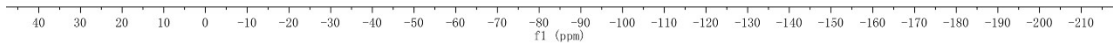

HRMS (ESI) copy of compound (*trans*)-**6l**:

### Mass Spectrum SmartFormula Report

#### Analysis Info

Analysis Name D:\Data\user\NWNW-fengyang 20230322-21.d  
Method tune\_low.m  
Sample Name A-48  
Comment

Acquisition Date 2023-3-22 10:24:09

Operator BDAL@DE  
Instrument / Ser# micrOTOF-Q 20453

#### Acquisition Parameter

|             |          |                       |           |                  |           |
|-------------|----------|-----------------------|-----------|------------------|-----------|
| Source Type | ESI      | Ion Polarity          | Positive  | Set Nebulizer    | 0.4 Bar   |
| Focus       | Active   | Set Capillary         | 4500 V    | Set Dry Heater   | 180 j°C   |
| Scan Begin  | 50 m/z   | Set End Plate Offset  | -500 V    | Set Dry Gas      | 4.0 l/min |
| Scan End    | 1000 m/z | Set Collision Cell RF | 400.0 Vpp | Set Divert Valve | Waste     |

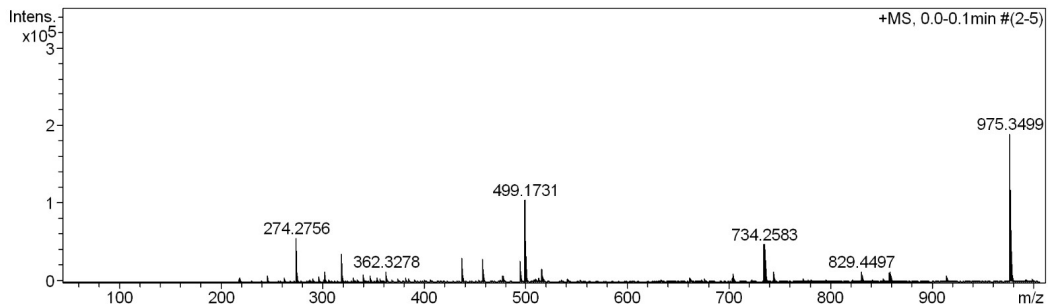

| Meas. #  | Formula                                                             | m/z      | err [ppm] | Me an err [ppm] | rdb  | N- R Conf | e; % | mS  | Std | Std | Std | Std | Std   | Std |
|----------|---------------------------------------------------------------------|----------|-----------|-----------------|------|-----------|------|-----|-----|-----|-----|-----|-------|-----|
| m/z      |                                                                     |          |           |                 |      |           |      |     |     |     |     |     |       |     |
| 499.1731 | 1 C <sub>27</sub> H <sub>23</sub> F <sub>3</sub> N <sub>4</sub> NaO | 499.1716 | -3.0      | -2.6            | 16.5 | ok        | even | 4.1 | 7.4 | 1.4 | 3.4 | 1.5 | 842.7 |     |

NMR copies of compound (*cis*)-**6l**

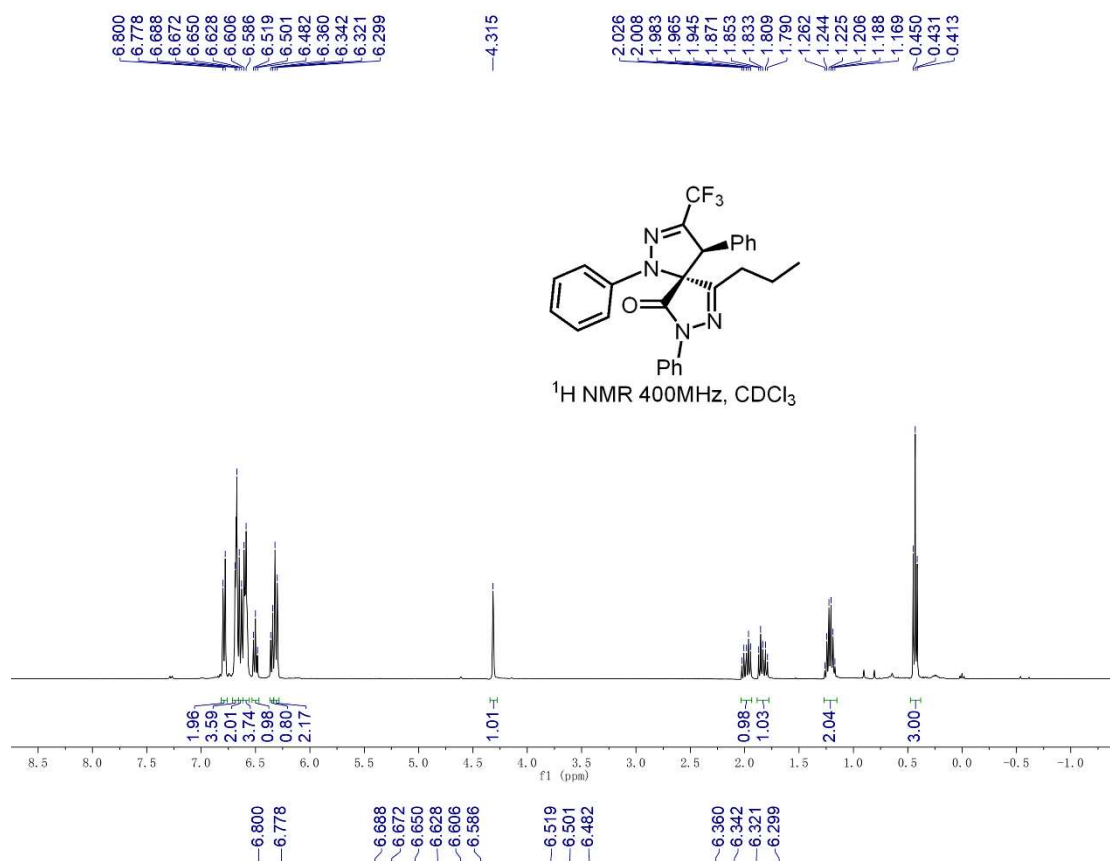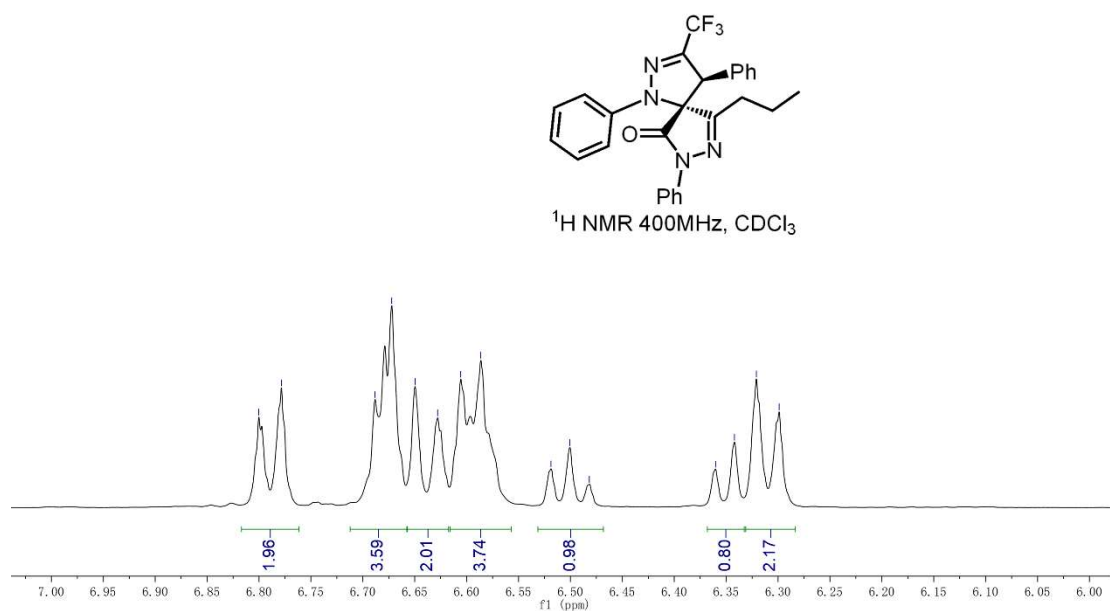

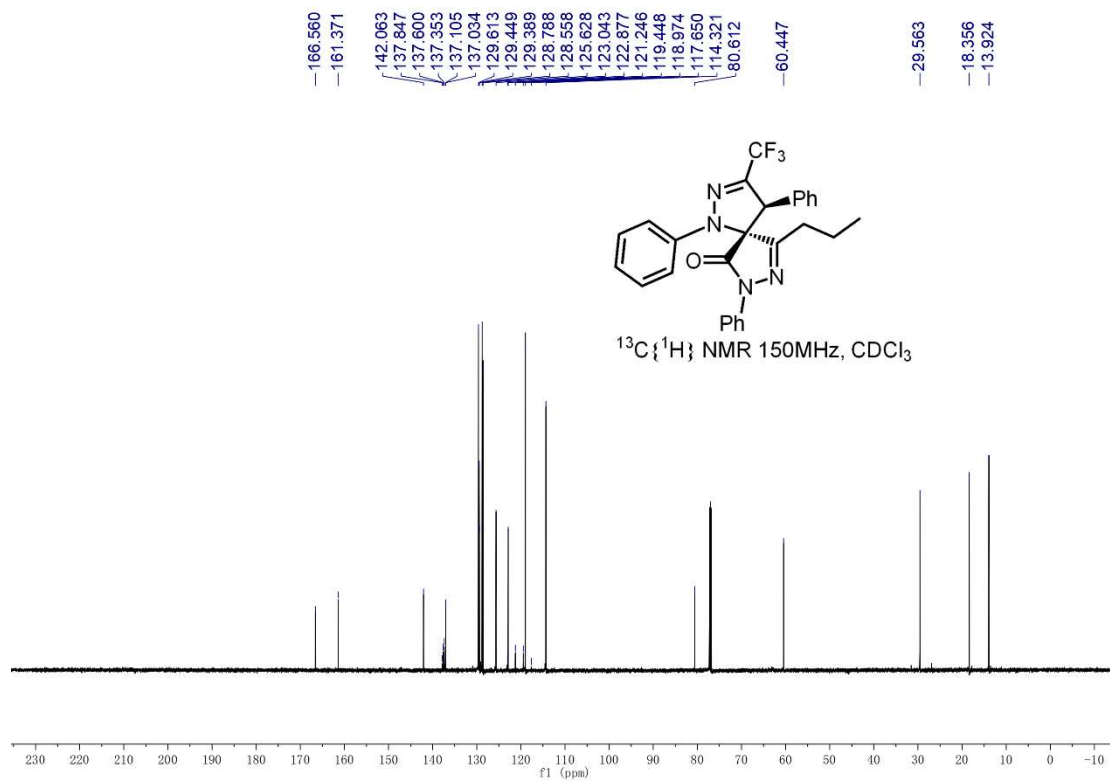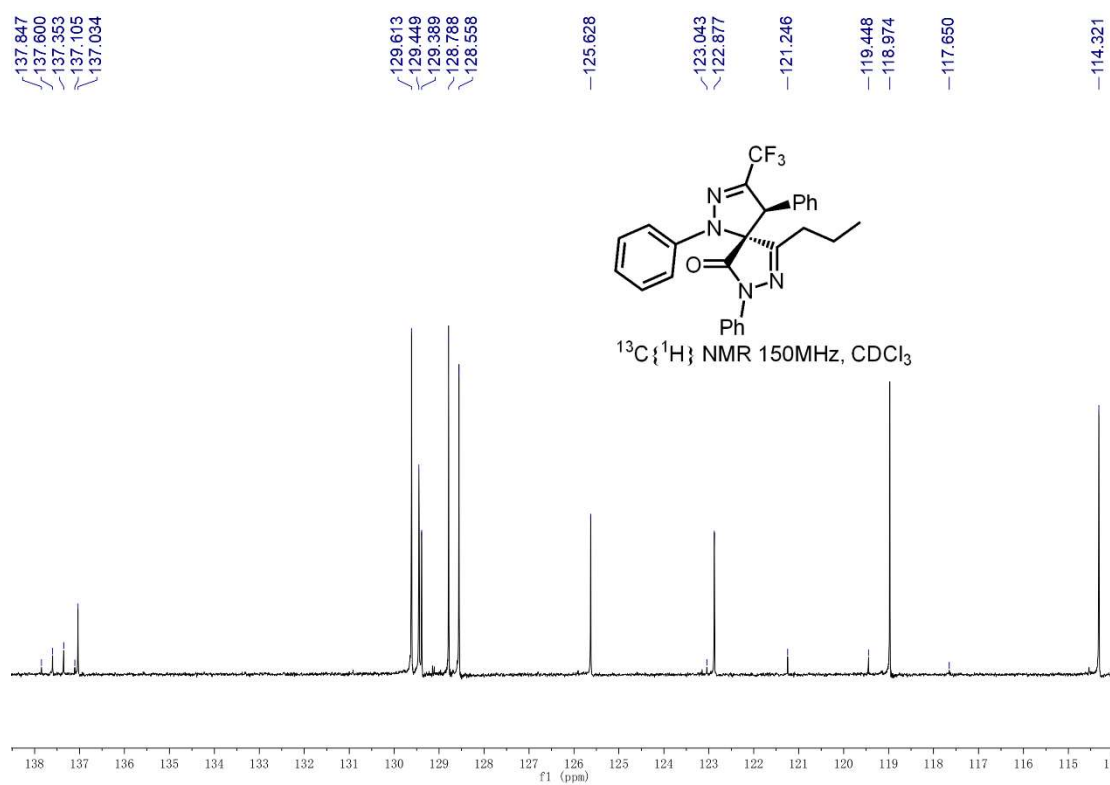

---61.975

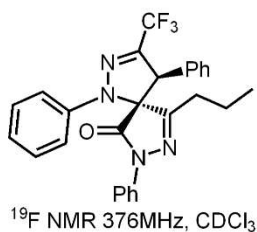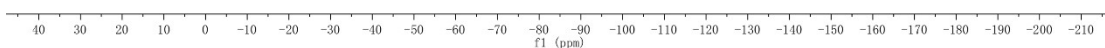

HRMS (ESI) copy of compound (*cis*)-**6l**:

### Mass Spectrum SmartFormula Report

#### Analysis Info

Analysis Name D:\Data\user\NWNNU-fengyang 20230322-22.d  
Method tune\_low.m  
Sample Name A-481  
Comment

Acquisition Date 2023-3-22 10:26:23  
Operator BDAL@DE  
Instrument / Ser# micrOTOF-Q 20453

#### Acquisition Parameter

|             |          |                       |           |                  |           |
|-------------|----------|-----------------------|-----------|------------------|-----------|
| Source Type | ESI      | Ion Polarity          | Positive  | Set Nebulizer    | 0.4 Bar   |
| Focus       | Active   | Set Capillary         | 4500 V    | Set Dry Heater   | 180 j°C   |
| Scan Begin  | 50 m/z   | Set End Plate Offset  | -500 V    | Set Dry Gas      | 4.0 l/min |
| Scan End    | 1000 m/z | Set Collision Cell RF | 400.0 Vpp | Set Divert Valve | Waste     |

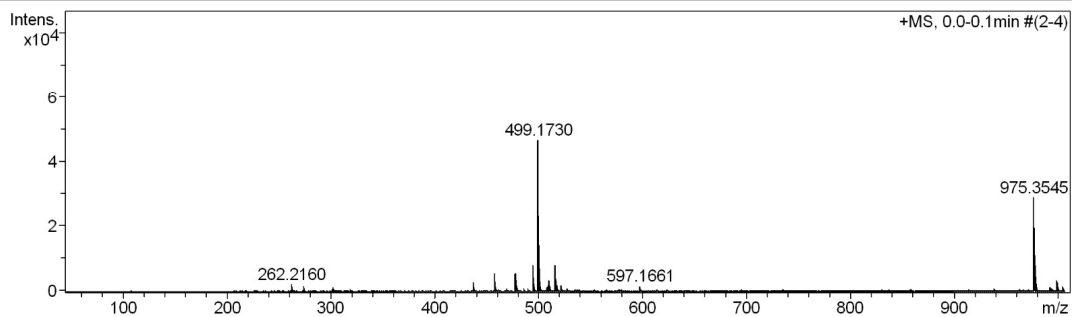

| Meas. #  | Formula                  | m/z      | err [ppm] | Me an err [ppm] | rdb  | N- R | e; % Conf | m Sig ma | Std l | St d Me an m/ z | St d Va rN or m | St d m/ Dif f | Std Com b Dev |
|----------|--------------------------|----------|-----------|-----------------|------|------|-----------|----------|-------|-----------------|-----------------|---------------|---------------|
| 499.1730 | 1 C 27 H 23 F 3 N 4 Na O | 499.1716 | -2.7      | -1.5            | 16.5 | ok   | even      | 8.8      | 15.9  | 2.5             | 7.6             | 7.4           | 842.7         |

## HPLC chromatogram of compounds 3a, 4c, 4f, 4g:

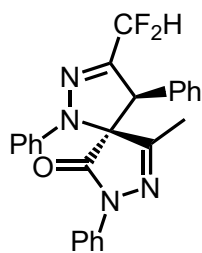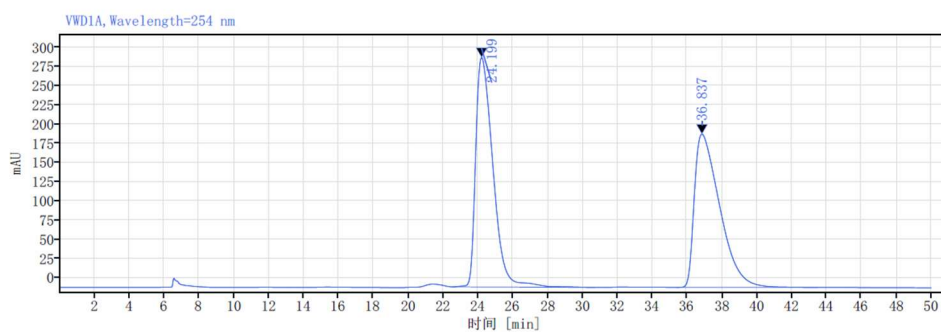

| Single VWD1A, Wavelength=254 nm |      |             |          |        |       |      |
|---------------------------------|------|-------------|----------|--------|-------|------|
| RetTime [min]                   | Type | Width [min] | Area     | Height | Area% | Name |
| 24.199                          | BB   | 8.15        | 20542.66 | 297.82 | 50.61 |      |
| 36.837                          | BB   | 8.11        | 20049.18 | 198.95 | 49.39 |      |
| Total                           |      |             | 40591.84 |        |       |      |

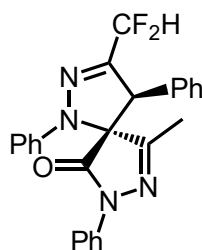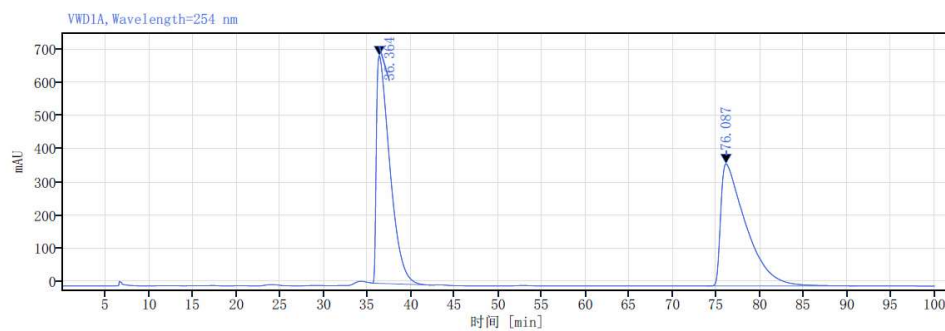

| Single: VWD1A, Wavelength=254 nm |      |             |           |        |       |      |
|----------------------------------|------|-------------|-----------|--------|-------|------|
| RetTime [min]                    | Type | Width [min] | Area      | Height | Area% | Name |
| 36.364                           | BB   | 6.65        | 73577.04  | 688.46 | 49.79 |      |
| 76.087                           | BB   | 17.27       | 74186.76  | 369.55 | 50.21 |      |
| Total                            |      |             | 147763.80 |        |       |      |



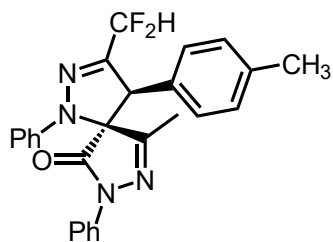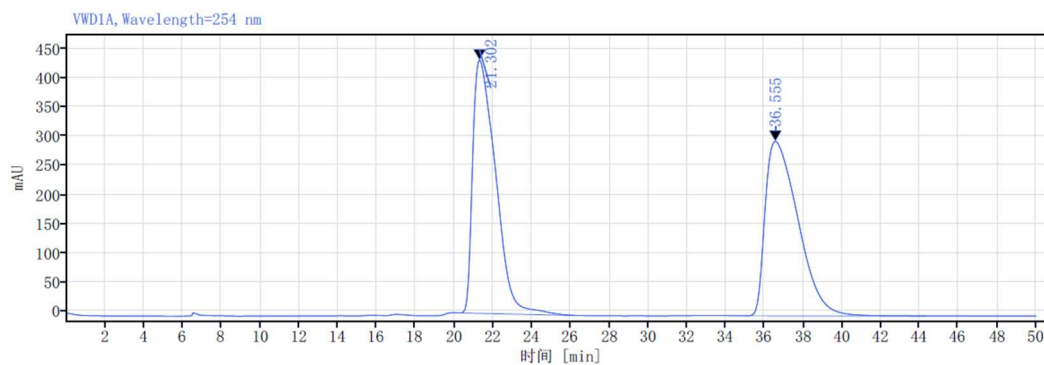

Single: VWD1A, Wavelength=254 nm

| RetTime [min] | Type | Width [min] | Area     | Height | Area% | Name |
|---------------|------|-------------|----------|--------|-------|------|
| 21.302        | BB   | 6.18        | 35504.28 | 432.90 | 50.25 |      |
| 36.555        | BB   | 9.36        | 35145.20 | 298.38 | 49.75 |      |
| Total         |      |             | 70649.48 |        |       |      |

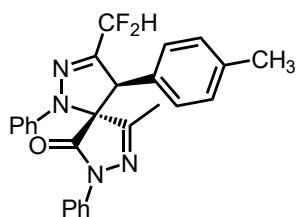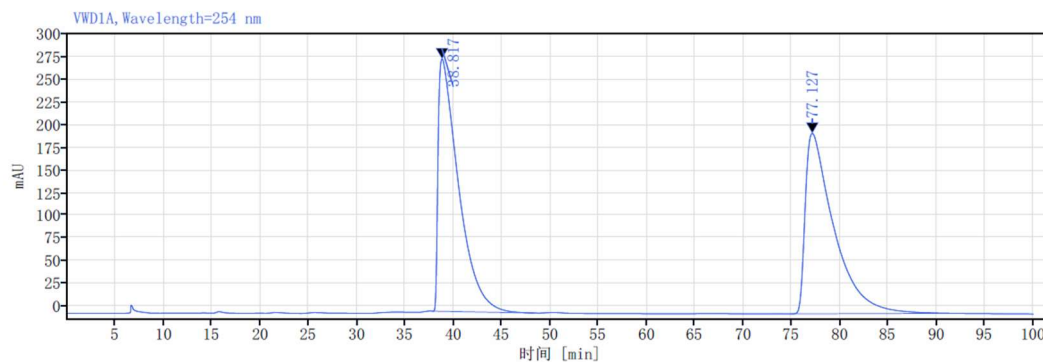

Single: VWD1A, Wavelength=254 nm

| RetTime [min] | Type | Width [min] | Area     | Height | Area% | Name |
|---------------|------|-------------|----------|--------|-------|------|
| 38.817        | BB   | 10.44       | 40717.95 | 278.39 | 49.85 |      |
| 77.127        | BB   | 16.73       | 40956.83 | 199.06 | 50.15 |      |
| Total         |      |             | 81674.78 |        |       |      |

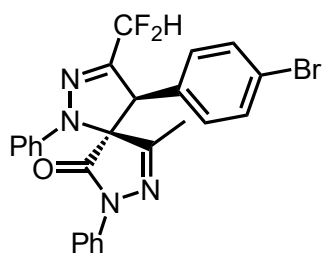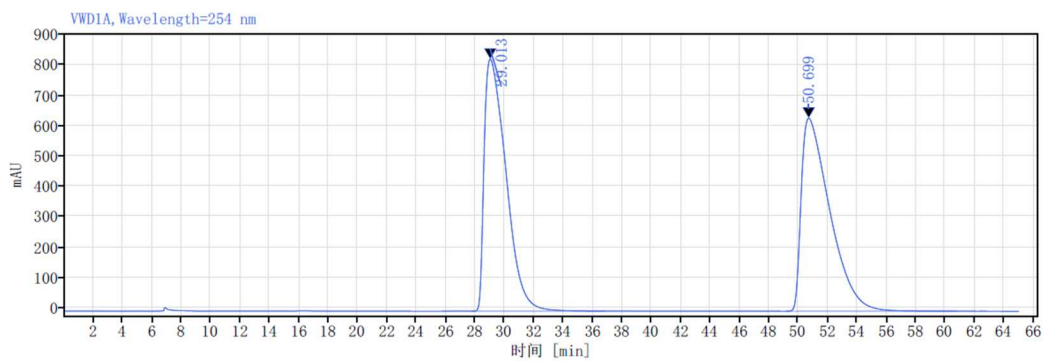

Single: VWD1A, Wavelength=254 nm

| RetTime [min] | Type | Width [min] | Area      | Height | Area% | Name |
|---------------|------|-------------|-----------|--------|-------|------|
| 29.013        | BB   | 9.06        | 85502.12  | 830.42 | 49.93 |      |
| 50.699        | BB   | 11.68       | 85739.51  | 636.02 | 50.07 |      |
| Total         |      |             | 171241.63 |        |       |      |

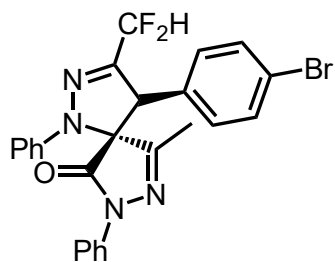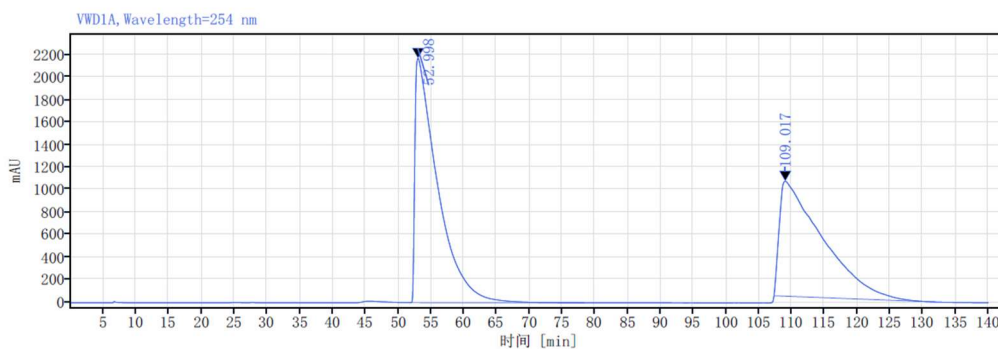

Single: VWD1A, Wavelength=254 nm

| RetTime [min] | Type | Width [min] | Area      | Height  | Area% | Name |
|---------------|------|-------------|-----------|---------|-------|------|
| 52.998        | BB   | 26.61       | 520039.08 | 2168.05 | 52.60 |      |
| 109.017       | BBA  | 24.77       | 468587.69 | 1019.58 | 47.40 |      |
| Total         |      |             | 988626.77 |         |       |      |

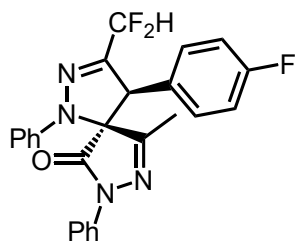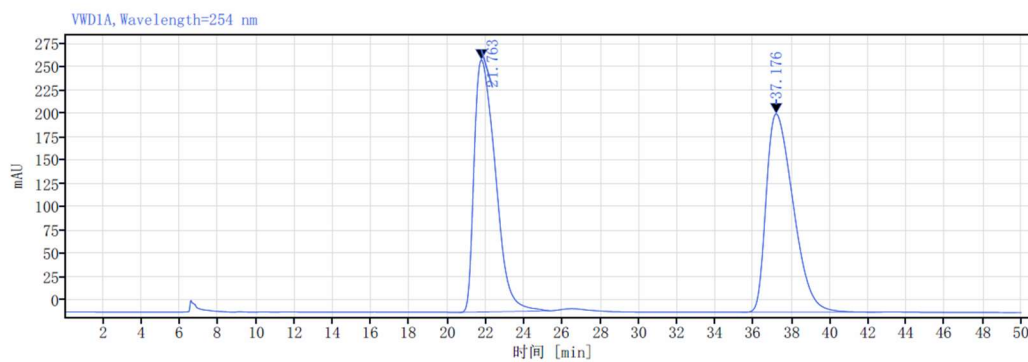

Single: VWD1A, Wavelength=254 nm

| RetTime [min] | Type | Width [min] | Area     | Height | Area% | Name |
|---------------|------|-------------|----------|--------|-------|------|
| 21.763        | BB   | 4.76        | 20835.25 | 270.09 | 50.03 |      |
| 37.176        | BB   | 6.97        | 20812.05 | 212.49 | 49.97 |      |
| Total         |      |             | 41647.30 |        |       |      |

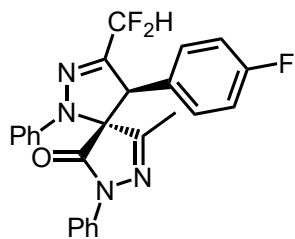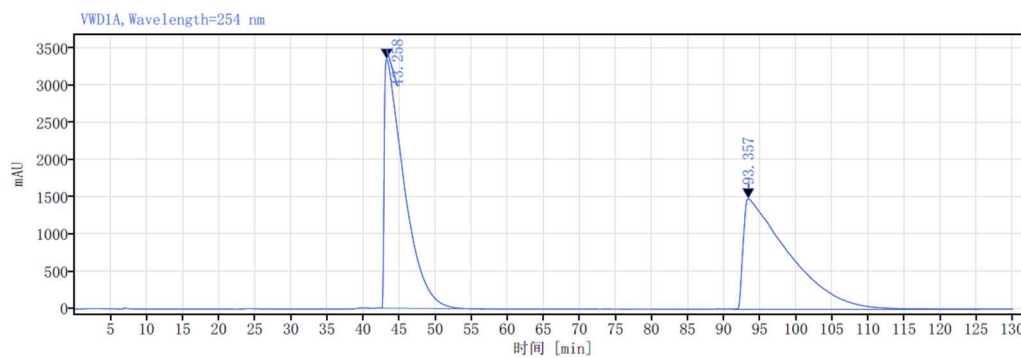

Single: VWD1A, Wavelength=254 nm

| RetTime [min] | Type | Width [min] | Area       | Height  | Area% | Name |
|---------------|------|-------------|------------|---------|-------|------|
| 43.258        | BB   | 14.29       | 634003.70  | 3350.71 | 49.52 |      |
| 93.357        | BB   | 34.23       | 646412.38  | 1483.98 | 50.48 |      |
| Total         |      |             | 1280416.08 |         |       |      |

## Crystallography data of compound (*cis*)-3a, (*cis*)-3j, (*trans*)-3j and (*cis*)-6a

### X-Ray Crystallographic Data of Compound (*cis*)-3a

Thermal ellipsoids are set at a 50% probability level. Crystal data have been deposited to CCDC, number 2178596.

#### Crystallization Details

The obtained compound (*cis*)-3a (35 mg) was dissolved in THF (0.2 mL) in a NMR tube at room temperature. Then petroleum ether (2 mL) was added to the solution slowly along the tube wall, resulting in a two-phase mixture. The colorless crystal of (*cis*)-3a was formed after the two-phase mixture has diffused.

#### Experimental

A suitable crystal was selected and placed on a ROD, Synergy Custom system, HyPix diffractometer. The crystal was kept at 301.78(10) K during data collection. Using Olex2 [1], the structure was solved with the SHELXT [2] structure solution program using Intrinsic Phasing and refined with the SHELXL [3] refinement package using Least Squares minimisation.

#### Crystal structure determination

Crystal Data for C<sub>25</sub>H<sub>20</sub>F<sub>2</sub>N<sub>4</sub>O (*M* = 430.45 g/mol): monoclinic, space group P2<sub>1</sub>/c (no. 14), *a* = 8.9 855(2) Å, *b* = 19.7009(3) Å, *c* = 12.8893(2) Å, β = 102.475(2)°, *V* = 2227.82(7) Å<sup>3</sup>, *Z* = 4, *T* = 301.78(10) K, μ(Cu Kα) = 0.764 mm<sup>-1</sup>, *D*<sub>calc</sub> = 1.283 g/cm<sup>3</sup>, 15574 reflections measured (8.336° ≤ 2θ ≤ 155.024°), 4439 unique (*R*<sub>int</sub> = 0.0273, *R*<sub>sigma</sub> = 0.0273) which were used in all calculations. The final *R*<sub>1</sub> was 0.0621 (*I* > 2σ(*I*)) and *wR*<sub>2</sub> was 0.1944 (all data).

#### Refinement model description

Number of restraints - 26, number of constraints - unknown.

Details:

##### 1. Fixed Uiso

At 1.2 times of:

All C(H) groups, All C(H,H) groups

At 1.5 times of:

All C(H,H,H) groups

2.a Ternary CH refined with riding coordinates:

C2(H2), C22(H22A), C22(H22)

3.b Aromatic/amide H refined with riding coordinates:

C9(H9), C10(H10), C11(H11), C12(H12), C13(H13), C14(H14), C16(H16),  
C17(H17),

C18(H18), C19(H19), C20(H20), C21(H21), C23(H23), C24(H24), C25(H25)

4.c Idealised Me refined as rotating group:

C15(H15A,H15B,H15C)

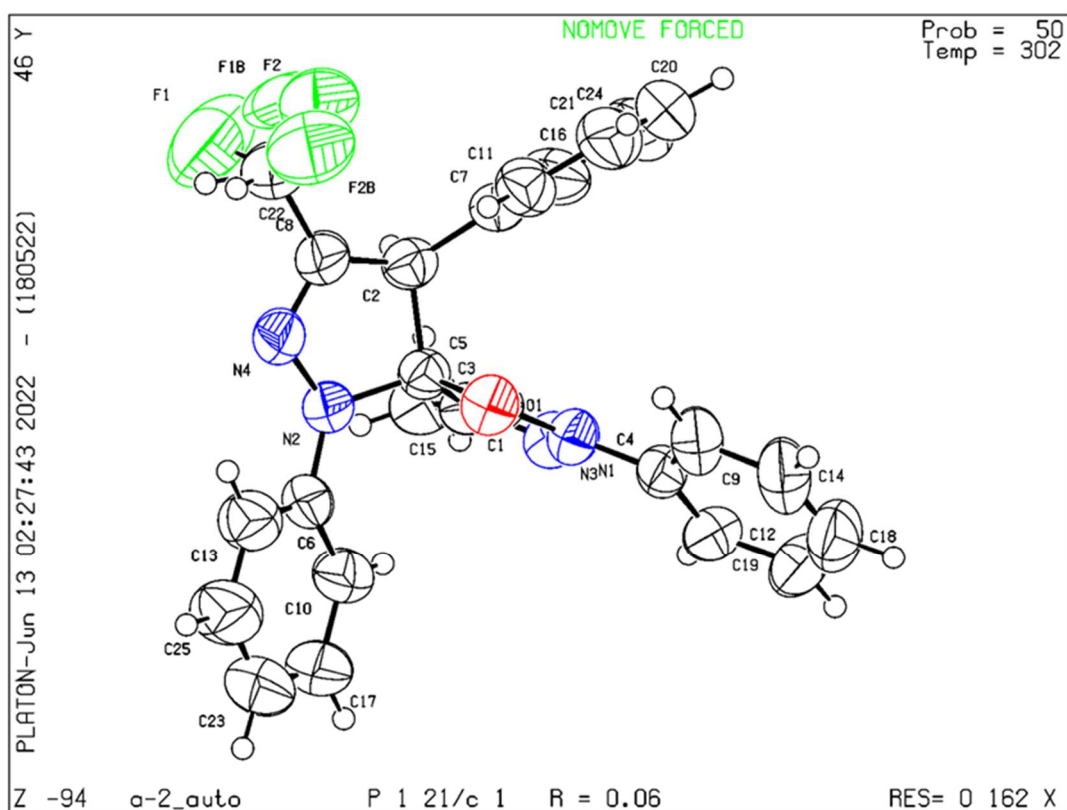

**Table S1 Crystallographic Data of Compound (*cis*)-3a**

|                                             |                                                                 |
|---------------------------------------------|-----------------------------------------------------------------|
| Identification code                         | A-2_auto                                                        |
| Empirical formula                           | C <sub>25</sub> H <sub>20</sub> F <sub>2</sub> N <sub>4</sub> O |
| Formula weight                              | 430.45                                                          |
| Temperature/K                               | 301.78(10)                                                      |
| Crystal system                              | monoclinic                                                      |
| Space group                                 | P2 <sub>1</sub> /c                                              |
| a/Å                                         | 8.9855(2)                                                       |
| b/Å                                         | 19.7009(3)                                                      |
| c/Å                                         | 12.8893(2)                                                      |
| α/°                                         | 90                                                              |
| β/°                                         | 102.475(2)                                                      |
| γ/°                                         | 90                                                              |
| Volume/Å <sup>3</sup>                       | 2227.82(7)                                                      |
| Z                                           | 4                                                               |
| ρ <sub>calc</sub> /g/cm <sup>3</sup>        | 1.283                                                           |
| μ/mm <sup>-1</sup>                          | 0.764                                                           |
| F(000)                                      | 896.0                                                           |
| Crystal size/mm <sup>3</sup>                | 0.11 × 0.09 × 0.05                                              |
| Radiation                                   | Cu Kα (λ = 1.54184)                                             |
| 2θ range for data collection/°              | 8.336 to 155.024                                                |
| Index ranges                                | -11 ≤ h ≤ 11, -24 ≤ k ≤ 17, -15 ≤ l ≤ 16                        |
| Reflections collected                       | 15574                                                           |
| Independent reflections                     | 4439 [R <sub>int</sub> = 0.0273, R <sub>sigma</sub> = 0.0273]   |
| Data/restraints/parameters                  | 4439/26/308                                                     |
| Goodness-of-fit on F <sup>2</sup>           | 1.072                                                           |
| Final R indexes [I >= 2σ (I)]               | R <sub>1</sub> = 0.0621, wR <sub>2</sub> = 0.1853               |
| Final R indexes [all data]                  | R <sub>1</sub> = 0.0711, wR <sub>2</sub> = 0.1944               |
| Largest diff. peak/hole / e Å <sup>-3</sup> | 0.50/-0.41                                                      |

**Table S2 Fractional Atomic Coordinates ( $\times 10^4$ ) and Equivalent Isotropic Displacement Parameters ( $\text{\AA}^2 \times 10^3$ ) for Compound (*cis*)-3a.  $U_{eq}$  is defined as  $1/3$  of the trace of the orthogonalised UIJ tensor.**

| Atom | <i>x</i>   | <i>y</i>   | <i>z</i>   | $U_{eq}$  |
|------|------------|------------|------------|-----------|
| F1   | 7962(7)    | 1574(5)    | 6948(5)    | 190(2)    |
| F1B  | 8383(6)    | 2140(3)    | 6932(4)    | 131.6(15) |
| F2   | 9029(6)    | 2235(3)    | 6149(7)    | 155.8(19) |
| F2B  | 9038(4)    | 1985(3)    | 5367(5)    | 135.7(15) |
| O1   | 5081.9(16) | 2686.2(7)  | 2929.3(11) | 65.1(4)   |
| N1   | 3263.0(18) | 3391.6(8)  | 3385.3(12) | 58.5(4)   |
| N2   | 4177.3(18) | 1812.2(8)  | 4556.9(13) | 62.1(4)   |
| N3   | 2381.1(19) | 3401.9(9)  | 4175.3(13) | 64.2(4)   |
| N4   | 5621(2)    | 1557.5(9)  | 4930.9(16) | 70.9(5)   |
| C1   | 4288(2)    | 2870.9(9)  | 3525.7(14) | 53.4(4)   |
| C2   | 5677(2)    | 2692.5(10) | 5474.5(15) | 60.3(5)   |
| C3   | 2853(2)    | 2922.9(10) | 4836.7(15) | 60.0(5)   |
| C4   | 2916(2)    | 3861.6(9)  | 2534.4(14) | 60.6(5)   |
| C5   | 4201(2)    | 2558.6(9)  | 4597.6(14) | 54.8(4)   |
| C6   | 3208(2)    | 1440.5(10) | 3745.8(16) | 63.2(5)   |
| C7   | 6455(2)    | 3358.9(10) | 5369.2(15) | 61.0(5)   |
| C8   | 6474(2)    | 2026.4(11) | 5415.7(18) | 69.7(5)   |
| C9   | 4020(3)    | 4026.7(11) | 1980.0(18) | 76.6(6)   |
| C10  | 1682(3)    | 1605.2(12) | 3449(2)    | 77.8(6)   |
| C11  | 7482(3)    | 3443.0(12) | 4720.9(18) | 74.3(6)   |
| C12  | 1494(3)    | 4157.5(12) | 2284(2)    | 79.9(6)   |
| C13  | 3760(3)    | 896.3(13)  | 3264(2)    | 84.1(7)   |
| C14  | 3663(4)    | 4488.4(12) | 1147(2)    | 92.1(8)   |
| C15  | 2173(3)    | 2790.3(15) | 5768(2)    | 83.8(7)   |

**Table S3 Anisotropic Displacement Parameters ( $\text{\AA}^2 \times 10^3$ ) for Compound (*cis*)-3a.**

The Anisotropic displacement factor exponent takes the form: -  
 $2\pi^2[h^2a^2U_{11}+2hka^*b^*U_{12}+\dots]$ .

| Atom | U <sub>11</sub> | U <sub>22</sub> | U <sub>33</sub> | U <sub>23</sub> | U <sub>13</sub> |
|------|-----------------|-----------------|-----------------|-----------------|-----------------|
| F1   | 141(3)          | 231(4)          | 182(4)          | 95(4)           | 4(3)            |
| F1B  | 104(2)          | 149(3)          | 112(3)          | -10(2)          | -45(2)          |
| F2   | 104(3)          | 146(3)          | 193(4)          | 30(3)           | -22(3)          |
| F2B  | 66.0(18)        | 165(3)          | 174(3)          | 5(3)            | 20(2)           |
| O1   | 71.3(8)         | 68.1(8)         | 59.7(7)         | -2.2(6)         | 22.5(7)         |
| N1   | 63.7(9)         | 57.8(8)         | 55.1(8)         | 1.5(6)          | 15.8(7)         |
| N2   | 55.3(8)         | 57.1(9)         | 70.1(9)         | 6.5(7)          | 5.2(7)          |
| N3   | 61.7(9)         | 70.0(10)        | 62.5(9)         | -3.6(8)         | 16.7(7)         |
| N4   | 59.6(9)         | 61.3(9)         | 87.8(12)        | 12.2(8)         | 7.0(8)          |
| C1   | 53.9(9)         | 54.8(9)         | 50.9(9)         | -2.8(7)         | 10.1(7)         |
| C2   | 56.0(10)        | 69.7(11)        | 54.1(10)        | 3.2(8)          | 9.7(8)          |
| C3   | 55.0(10)        | 69.5(11)        | 56.7(10)        | -2.4(8)         | 14.7(8)         |
| C4   | 76.4(12)        | 48.2(9)         | 53.0(9)         | -5.4(7)         | 4.6(8)          |
| C5   | 51.5(9)         | 57.3(10)        | 55.5(10)        | 1.7(7)          | 11.5(7)         |
| C6   | 65.1(11)        | 57.4(10)        | 65.9(11)        | 6.0(8)          | 11.4(9)         |
| C8   | 57.4(10)        | 67.4(12)        | 80.1(13)        | 11.0(10)        | 5.9(9)          |
| C9   | 103.1(17)       | 56.8(11)        | 73.3(13)        | 4.9(9)          | 26.8(12)        |
| C10  | 62.9(12)        | 74.6(13)        | 91.9(15)        | -2.4(11)        | 8.0(11)         |
| C11  | 75.7(13)        | 75.1(13)        | 72.9(13)        | 0.2(10)         | 17.7(10)        |
| C12  | 77.6(13)        | 74.2(13)        | 77.2(14)        | 1.1(11)         | -6.8(11)        |
| C13  | 82.7(15)        | 80.0(14)        | 86.1(15)        | -10.0(12)       | 10.6(12)        |
| C14  | 144(3)          | 60.2(13)        | 75.9(14)        | 6.6(11)         | 31.7(15)        |
| C15  | 71.0(13)        | 113.1(19)       | 73.2(14)        | 8.1(13)         | 28.8(11)        |
| C16  | 77.1(14)        | 89.1(16)        | 90.1(16)        | -29.3(13)       | 10.0(12)        |
| C17  | 70.9(14)        | 94.6(18)        | 104.4(19)       | 3.3(15)         | -0.8(13)        |
| C18  | 162(3)          | 71.5(15)        | 73.9(16)        | 12.0(12)        | 0.5(18)         |
| C19  | 111(2)          | 87.8(18)        | 93.9(19)        | 10.9(15)        | -18.2(17)       |
| C20  | 113(2)          | 69.9(16)        | 127(3)          | 7.9(16)         | -20(2)          |
| C21  | 94.8(18)        | 101(2)          | 90.6(17)        | 18.3(15)        | 10.2(14)        |
| C22  | 65.2(14)        | 96.5(19)        | 131(3)          | 19.4(18)        | -7.9(15)        |
| C23  | 111(2)          | 90.9(18)        | 98.1(19)        | -16.7(15)       | -1.9(16)        |
| C24  | 104(2)          | 72.0(16)        | 140(3)          | -34.2(17)       | -1(2)           |
| C25  | 114(2)          | 91.7(19)        | 108(2)          | -29.9(16)       | 1.7(18)         |



**Table S4 Bond Lengths for Compound (*cis*)-3a.**

| <b>Atom</b> | <b>Atom</b> | <b>Length/Å</b> | <b>Atom</b> | <b>Atom</b> |
|-------------|-------------|-----------------|-------------|-------------|
| F1          | C22         | 1.327(6)        | C4          | C9          |
| F1B         | C22         | 1.321(6)        | C4          | C12         |
| F2          | C22         | 1.187(5)        | C6          | C10         |
| F2B         | C22         | 1.380(6)        | C6          | C13         |
| O1          | C1          | 1.212(2)        | C7          | C11         |
| N1          | N3          | 1.419(2)        | C7          | C16         |
| N1          | C1          | 1.364(2)        | C8          | C22         |
| N1          | C4          | 1.418(2)        | C9          | C14         |
| N2          | N4          | 1.377(2)        | C10         | C17         |
| N2          | C5          | 1.471(2)        | C11         | C21         |
| N2          | C6          | 1.412(3)        | C12         | C19         |
| N3          | C3          | 1.281(3)        | C13         | C25         |
| N4          | C8          | 1.274(3)        | C14         | C18         |
| C1          | C5          | 1.530(2)        | C16         | C24         |
| C2          | C5          | 1.568(3)        | C17         | C23         |
| C2          | C7          | 1.507(3)        | C18         | C19         |
| C2          | C8          | 1.505(3)        | C20         | C21         |
| C3          | C5          | 1.496(3)        | C20         | C24         |
| C3          | C15         | 1.483(3)        | C23         | C25         |

**Table S5 Bond Angles for Compound (*cis*)-3a.**

| Atom | Atom | Atom | Angle/°    | Atom | Atom | Atom |
|------|------|------|------------|------|------|------|
| C1   | N1   | N3   | 112.41(14) | C13  | C6   | N2   |
| C1   | N1   | C4   | 128.54(16) | C11  | C7   | C2   |
| C4   | N1   | N3   | 118.82(15) | C16  | C7   | C2   |
| N4   | N2   | C5   | 110.26(14) | C16  | C7   | C11  |
| N4   | N2   | C6   | 117.00(17) | N4   | C8   | C2   |
| C6   | N2   | C5   | 123.13(15) | N4   | C8   | C22  |
| C3   | N3   | N1   | 108.12(15) | C22  | C8   | C2   |
| C8   | N4   | N2   | 109.19(17) | C4   | C9   | C14  |
| O1   | C1   | N1   | 127.93(17) | C6   | C10  | C17  |
| O1   | C1   | C5   | 127.14(16) | C7   | C11  | C21  |
| N1   | C1   | C5   | 104.93(14) | C4   | C12  | C19  |
| C7   | C2   | C5   | 114.72(16) | C25  | C13  | C6   |
| C8   | C2   | C5   | 98.89(16)  | C18  | C14  | C9   |
| C8   | C2   | C7   | 121.32(17) | C24  | C16  | C7   |
| N3   | C3   | C5   | 112.50(16) | C23  | C17  | C10  |
| N3   | C3   | C15  | 122.23(19) | C14  | C18  | C19  |
| C15  | C3   | C5   | 125.15(19) | C18  | C19  | C12  |
| C9   | C4   | N1   | 119.45(19) | C24  | C20  | C21  |
| C12  | C4   | N1   | 119.7(2)   | C20  | C21  | C11  |
| C12  | C4   | C9   | 120.8(2)   | F1   | C22  | C8   |
| N2   | C5   | C1   | 111.90(15) | F1B  | C22  | F2B  |
| N2   | C5   | C2   | 101.39(14) | F1B  | C22  | C8   |
| N2   | C5   | C3   | 118.72(15) | F2   | C22  | F1   |
| C1   | C5   | C2   | 112.54(14) | F2   | C22  | C8   |
| C3   | C5   | C1   | 101.22(15) | F2B  | C22  | C8   |
| C3   | C5   | C2   | 111.53(15) | C25  | C23  | C17  |
| C10  | C6   | N2   | 120.0(2)   | C20  | C24  | C16  |
| C10  | C6   | C13  | 119.2(2)   | C23  | C25  | C13  |

**Table S6 Torsion Angles for Compound (*cis*)-3a.**

| <b>A</b> | <b>B</b> | <b>C</b> | <b>D</b> | <b>Angle/°</b> | <b>A</b> | <b>B</b> | <b>C</b> | <b>D</b> | <b>Angle/°</b> |
|----------|----------|----------|----------|----------------|----------|----------|----------|----------|----------------|
| O1       | C1       | C5       | N2       | -42.9(2)       | C4       | C9       | C14      | C18      | 2.1(4)         |
| O1       | C1       | C5       | C2       | 70.5(2)        | C4       | C12      | C19      | C18      | 0.9(4)         |
| O1       | C1       | C5       | C3       | -170.32(18)    | C5       | N2       | N4       | C8       | 14.4(2)        |
| N1       | N3       | C3       | C5       | 3.8(2)         | C5       | N2       | C6       | C10      | -47.2(3)       |
| C5       | N2       | C6       | C10      | -47.2(3)       | C5       | N2       | C6       | C13      | 134.8(2)       |
| N1       | C1       | C5       | N2       | 136.14(15)     | C5       | C2       | C7       | C11      | -84.6(2)       |
| N1       | C1       | C5       | C2       | -110.46(17)    | C5       | C2       | C7       | C16      | 92.7(2)        |
| N1       | C1       | C5       | C3       | 8.71(18)       | C5       | C2       | C8       | N4       | -15.9(2)       |
| N1       | C4       | C9       | C14      | 179.99(19)     | C5       | C2       | C8       | C22      | 175.4(2)       |
| N1       | C4       | C12      | C19      | 178.6(2)       | C6       | N2       | N4       | C8       | 161.71(18)     |
| N2       | N4       | C8       | C2       | 2.1(3)         | C6       | N2       | C5       | C1       | -48.0(2)       |
| N2       | N4       | C8       | C22      | 172.1(2)       | C6       | N2       | C5       | C2       | -168.14(17)    |
| N2       | C6       | C10      | C17      | -176.9(2)      | C6       | N2       | C5       | C3       | 69.4(2)        |
| N2       | C6       | C13      | C25      | 175.9(2)       | C6       | C10      | C17      | C23      | 0.8(4)         |
| N3       | N1       | C1       | O1       | 171.60(18)     | C6       | C13      | C25      | C23      | 1.3(5)         |
| N3       | N1       | C1       | C5       | -7.43(19)      | C7       | C2       | C5       | N2       | 152.25(16)     |
| N3       | N1       | C4       | C9       | 157.70(18)     | C7       | C2       | C5       | C1       | 32.5(2)        |
| N3       | N1       | C4       | C12      | -21.0(3)       | C7       | C2       | C5       | C3       | -80.4(2)       |
| N3       | C3       | C5       | N2       | -130.71(18)    | C7       | C2       | C8       | N4       | -142.1(2)      |
| N3       | C3       | C5       | C1       | -7.9(2)        | C7       | C2       | C8       | C22      | 49.2(3)        |
| N3       | C3       | C5       | C2       | 112.02(19)     | C7       | C11      | C21      | C20      | -0.9(4)        |
| N4       | N2       | C5       | C1       | 96.97(18)      | C7       | C16      | C24      | C20      | -0.9(5)        |
| N4       | N2       | C5       | C2       | -23.19(19)     | C8       | C2       | C5       | N2       | 21.62(17)      |
| N4       | N2       | C5       | C3       | -145.69(17)    | C8       | C2       | C5       | C1       | -98.08(18)     |
| N4       | N2       | C6       | C10      | 170.01(19)     | C8       | C2       | C5       | C3       | 148.95(16)     |
| N4       | N2       | C6       | C13      | -8.0(3)        | C8       | C2       | C7       | C11      | 34.0(3)        |
| N4       | C8       | C22      | F1       | -81.8(5)       | C8       | C2       | C7       | C16      | -148.6(2)      |
| N4       | C8       | C22      | F1B      | -138.4(4)      | C9       | C4       | C12      | C19      | -0.2(3)        |
| N4       | C8       | C22      | F2       | 154.0(7)       | C9       | C14      | C18      | C19      | -1.4(4)        |
| N4       | C8       | C22      | F2B      | 99.2(4)        | C10      | C6       | C13      | C25      | -2.1(4)        |
| C1       | N1       | N3       | C3       | 2.6(2)         | C10      | C17      | C23      | C25      | -1.6(5)        |
| C1       | N1       | C4       | C9       | -28.2(3)       | C11      | C7       | C16      | C24      | 1.1(4)         |
| C1       | N1       | C4       | C12      | 153.1(2)       | C12      | C4       | C9       | C14      | -1.3(3)        |
| C2       | C7       | C11      | C21      | 177.2(2)       | C13      | C6       | C10      | C17      | 1.1(4)         |
| C2       | C7       | C16      | C24      | -176.4(2)      | C14      | C18      | C19      | C12      | -0.1(5)        |
| C2       | C8       | C22      | F1       | 86.7(5)        | C15      | C3       | C5       | N2       | 53.2(3)        |
| C2       | C8       | C22      | F1B      | 30.1(5)        | C15      | C3       | C5       | C1       | 176.1(2)       |
| C2       | C8       | C22      | F2       | -37.5(8)       | C15      | C3       | C5       | C2       | -64.0(3)       |
| C2       | C8       | C22      | F2B      | -92.3(4)       | C16      | C7       | C11      | C21      | -0.2(3)        |
| C4       | N1       | N3       | C3       | 177.64(17)     | C17      | C23      | C25      | C13      | 0.6(5)         |
| C4       | N1       | C1       | O1       | -2.8(3)        | C21      | C20      | C24      | C16      | -0.2(5)        |

|    |    |    |    |            |     |     |     |     |        |
|----|----|----|----|------------|-----|-----|-----|-----|--------|
| C4 | N1 | C1 | C5 | 178.13(17) | C24 | C20 | C21 | C11 | 1.1(5) |
|----|----|----|----|------------|-----|-----|-----|-----|--------|

**Table S7 Hydrogen Atom Coordinates ( $\text{\AA}\times 10^4$ ) and Isotropic Displacement Parameters ( $\text{\AA}^2\times 10^3$ ) for Compound (*cis*)-3a.**

| Atom | <i>x</i> | <i>y</i> | <i>z</i> | U(eq) |
|------|----------|----------|----------|-------|
| H2   | 5367.68  | 2701.73  | 6158.55  | 72    |
| H9   | 4984.71  | 3832.63  | 2160.46  | 92    |
| H10  | 1300.09  | 1974.49  | 3758     | 93    |
| H11  | 7751.32  | 3074.14  | 4350.43  | 89    |
| H12  | 753.77   | 4043.64  | 2658.91  | 96    |
| H13  | 4791.78  | 789.26   | 3439.47  | 101   |
| H14  | 4385.71  | 4593.08  | 752.42   | 111   |
| H15A | 2844.66  | 2955.69  | 6399.56  | 126   |
| H15B | 2024.95  | 2310.85  | 5832.79  | 126   |
| H15C | 1208.9   | 3018.35  | 5673.21  | 126   |
| H16  | 5409.18  | 3867.44  | 6358.39  | 104   |
| H17  | -306.83  | 1333.08  | 2481.07  | 112   |
| H18  | 2056.74  | 5101.85  | 356.13   | 127   |
| H19  | 233.72   | 4834.06  | 1298.09  | 124   |
| H20  | 8110.59  | 5052.02  | 5079.07  | 132   |
| H21  | 8812     | 4129.14  | 4192.14  | 116   |
| H22A | 8057.07  | 1335.01  | 6126.57  | 123   |
| H22  | 8365.4   | 1454.56  | 5602.65  | 123   |
| H23  | 620.33   | 403.32   | 1741.05  | 124   |
| H24  | 6419.72  | 4912.93  | 6159.38  | 131   |
| H25  | 3151.82  | 143.36   | 2212.81  | 130   |

## X-Ray Crystallographic Data of Compound (*trans*)-**3j**

Thermal ellipsoids are set at a 50% probability level. Crystal data have been deposited to CCDC, number 2253536.

### Crystallization Details

The obtained compound (*trans*)-**3j** (35 mg) was dissolved in THF (0.2 mL) in a NMR tube at room temperature. Then petroleum ether (2 mL) was added to the solution slowly along the tube wall, resulting in a two-phase mixture. The colorless crystal of (*trans*)-**3j** was formed after the two-phase mixture has diffused.

### Experimental

A suitable crystal was selected and placed on a ROD, Synergy Custom system, HyPix diffractometer. The crystal was kept at 301.71(10) K during data collection. Using Olex2 [1], the structure was solved with the SHELXT [2] structure solution program using Intrinsic Phasing and refined with the SHELXL [3] refinement package using Least Squares minimisation.

### Crystal structure determination

Crystal Data for  $C_{50}H_{36}Cl_4F_4N_8O_2$  ( $M=998.67$  g/mol): monoclinic, space group  $I2/a$  (no. 15),  $a = 18.9993(2)$  Å,  $b = 11.37225(15)$  Å,  $c = 43.5762(5)$  Å,  $\beta = 96.9104(11)^\circ$ ,  $V = 9346.9(2)$  Å<sup>3</sup>,  $Z = 8$ ,  $T = 301.71(10)$  K,  $\mu(\text{Cu K}\alpha) = 2.864$  mm<sup>-1</sup>,  $D_{\text{calc}} = 1.419$  g/cm<sup>3</sup>, 30745 reflections measured ( $4.086^\circ \leq 2\theta \leq 154.802^\circ$ ), 9322 unique ( $R_{\text{int}} = 0.0332$ ,  $R_{\text{sigma}} = 0.0372$ ) which were used in all calculations. The final  $R_1$  was 0.0644 ( $I > 2\sigma(I)$ ) and  $wR_2$  was 0.2087 (all data).

### Refinement model description

Number of restraints - 42, number of constraints - unknown.

Details:

#### 1. Fixed Uiso

At 1.2 times of:

All C(H) groups

At 1.5 times of:

All C(H,H,H) groups

2.a Ternary CH refined with riding coordinates:

C4(H4), C48(H48), C2(H2), C44(H44)

3.b Aromatic/amide H refined with riding coordinates:

C11(H11), C12(H12), C17(H17), C18(H18), C21(H21), C35(H35), C36(H36),  
C37(H37), C41(H41), C42(H42), C43(H43), C45(H45), C46(H46), C15(H15),  
C20(H20),

C23(H23), C25(H25), C29(H29), C30(H30), C33(H33), C38(H38), C39(H39),  
C40(H40), C47(H47), C49(H49), C50(H50)

4.c Idealised Me refined as rotating group:

C27(H27A,H27B,H27C), C28(H28A,H28B,H28C)

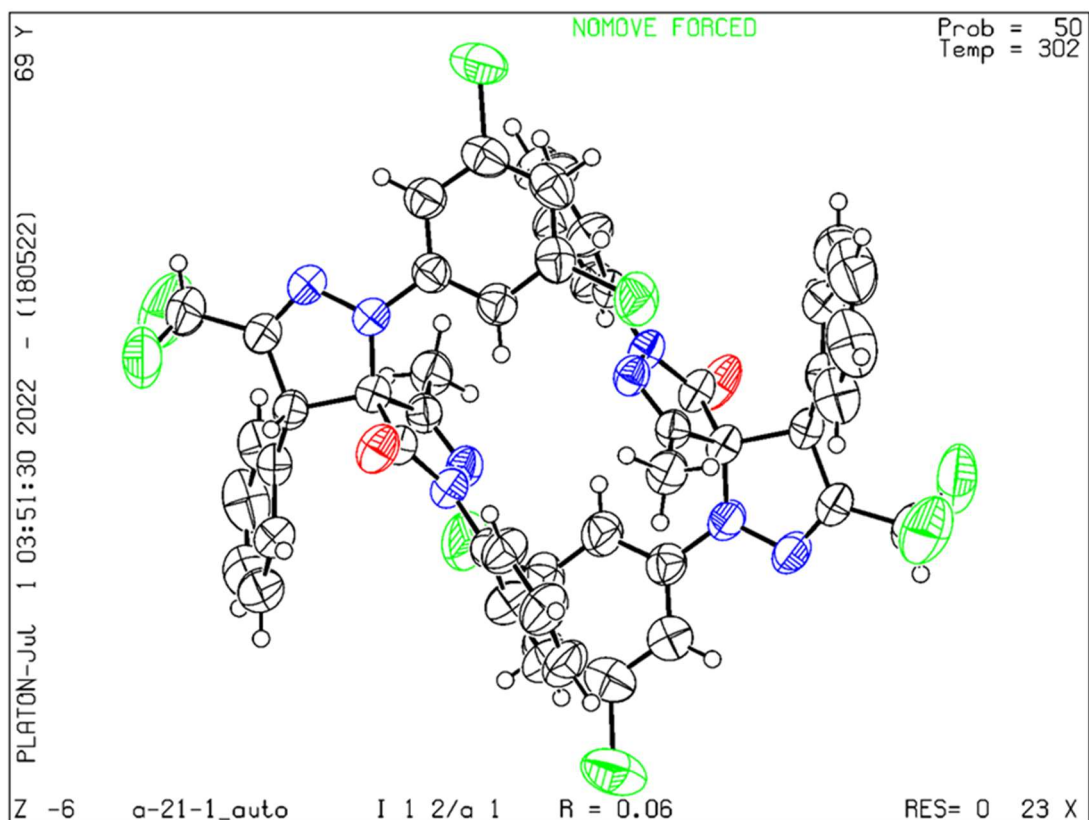

**Table S8 Crystal data and structure refinement for Compound (*trans*)-3j.**

|                                             |                                                                                              |
|---------------------------------------------|----------------------------------------------------------------------------------------------|
| Identification code                         | A-21-1_auto                                                                                  |
| Empirical formula                           | C <sub>50</sub> H <sub>36</sub> Cl <sub>4</sub> F <sub>4</sub> N <sub>8</sub> O <sub>2</sub> |
| Formula weight                              | 998.67                                                                                       |
| Temperature/K                               | 301.71(10)                                                                                   |
| Crystal system                              | monoclinic                                                                                   |
| Space group                                 | I2/a                                                                                         |
| a/Å                                         | 18.9993(2)                                                                                   |
| b/Å                                         | 11.37225(15)                                                                                 |
| c/Å                                         | 43.5762(5)                                                                                   |
| $\alpha$ /°                                 | 90                                                                                           |
| $\beta$ /°                                  | 96.9104(11)                                                                                  |
| $\gamma$ /°                                 | 90                                                                                           |
| Volume/Å <sup>3</sup>                       | 9346.9(2)                                                                                    |
| Z                                           | 8                                                                                            |
| $\rho_{\text{calc}}$ /cm <sup>3</sup>       | 1.419                                                                                        |
| $\mu$ /mm <sup>-1</sup>                     | 2.864                                                                                        |
| F(000)                                      | 4096.0                                                                                       |
| Crystal size/mm <sup>3</sup>                | 0.09 × 0.07 × 0.05                                                                           |
| Radiation                                   | Cu K $\alpha$ ( $\lambda$ = 1.54184)                                                         |
| 2 $\Theta$ range for data collection/°      | 4.086 to 154.802                                                                             |
| Index ranges                                | -23 ≤ h ≤ 23, -12 ≤ k ≤ 14, -54 ≤ l ≤ 39                                                     |
| Reflections collected                       | 30745                                                                                        |
| Independent reflections                     | 9322 [R <sub>int</sub> = 0.0332, R <sub>sigma</sub> = 0.0372]                                |
| Data/restraints/parameters                  | 9322/42/615                                                                                  |
| Goodness-of-fit on F <sup>2</sup>           | 1.083                                                                                        |
| Final R indexes [I ≥ 2 $\sigma$ (I)]        | R <sub>1</sub> = 0.0644, wR <sub>2</sub> = 0.1957                                            |
| Final R indexes [all data]                  | R <sub>1</sub> = 0.0760, wR <sub>2</sub> = 0.2087                                            |
| Largest diff. peak/hole / e Å <sup>-3</sup> | 0.80/-0.4                                                                                    |

**Table S9 Fractional Atomic Coordinates ( $\times 10^4$ ) and Equivalent Isotropic Displacement Parameters ( $\text{\AA}^2 \times 10^3$ ) for Compound (*trans*)-3j.  $U_{eq}$  is defined as 1/3 of the trace of the orthogonalised  $U_{ij}$  tensor.**

| Atom | <i>x</i>   | <i>y</i>   | <i>z</i>  | $U_{eq}$  |
|------|------------|------------|-----------|-----------|
| C11  | 5481.6(4)  | 8115.4(8)  | 6281.8(2) | 91.7(3)   |
| C12  | 4703.7(5)  | 11241.2(6) | 7096.2(2) | 96.9(3)   |
| F1   | 3393.5(13) | 5307(2)    | 7977.5(4) | 107.6(7)  |
| F4   | 2535.8(15) | 6359(3)    | 7803.5(6) | 147.4(10) |
| O1   | 5038.9(9)  | 4619.5(17) | 7129.4(4) | 67.5(4)   |
| N2   | 4287.1(9)  | 4522.5(16) | 6671.9(4) | 51.4(4)   |
| N4   | 4137.7(12) | 6875.8(17) | 7173.9(4) | 60.6(5)   |
| N5   | 3658.1(10) | 5080.1(17) | 6538.8(4) | 54.0(4)   |
| N8   | 3830.7(12) | 7142.9(18) | 7434.1(4) | 65.0(5)   |
| C3   | 3917.8(11) | 5729.6(18) | 7045.0(4) | 50.1(4)   |
| C4   | 3580.5(12) | 5158.4(19) | 7322.6(4) | 51.8(5)   |
| C5   | 3451.1(11) | 5777.9(19) | 6739.1(5) | 51.6(5)   |
| C7   | 2949.4(12) | 4366(2)    | 7233.2(5) | 55.3(5)   |
| C10  | 4613.1(11) | 3691.8(19) | 6491.0(4) | 51.0(5)   |
| C11  | 4192.6(14) | 3030(2)    | 6278.1(6) | 69.2(6)   |
| C12  | 3073.0(16) | 3197(2)    | 7168.3(5) | 68.7(6)   |
| C13  | 4438.1(12) | 7784(2)    | 7016.1(5) | 55.0(5)   |
| C17  | 5061.0(13) | 9578(2)    | 6704.0(6) | 69.3(7)   |
| C18  | 4424.4(13) | 8930(2)    | 7125.6(5) | 61.3(5)   |
| C19  | 5073.7(12) | 8434(2)    | 6606.0(5) | 62.5(6)   |
| C21  | 4765.3(12) | 7528(2)    | 6753.9(5) | 60.1(5)   |
| C22  | 3503.6(14) | 6239(2)    | 7515.7(5) | 61.7(6)   |
| C24  | 4513.1(11) | 4907.7(19) | 6963.6(4) | 50.6(5)   |
| C27  | 2842.4(14) | 6589(2)    | 6664.1(5) | 66.4(6)   |
| C31  | 4732.3(14) | 9802(2)    | 6966.5(6) | 66.3(6)   |
| C35  | 5643.2(16) | 2758(3)    | 6338.6(7) | 84.3(8)   |
| C36  | 5226.6(17) | 2103(3)    | 6125.5(6) | 80.1(8)   |
| C37  | 5339.3(13) | 3556(3)    | 6524.7(6) | 70.5(7)   |
| C41  | 4499.9(17) | 2238(3)    | 6095.4(6) | 80.3(8)   |
| C42  | 2255.5(14) | 4762(3)    | 7213.4(7) | 75.7(7)   |
| C43  | 2520(2)    | 2430(3)    | 7082.2(7) | 89.5(9)   |
| C45  | 1700.8(17) | 3955(4)    | 7124.6(8) | 95.2(11)  |
| C46  | 1849(2)    | 2807(4)    | 7059.3(8) | 96.9(10)  |
| C48  | 3211(2)    | 6286(3)    | 7820.1(7) | 84.9(9)   |
| C13  | 1806.0(7)  | 4356.7(11) | 6176.2(2) | 135.1(5)  |
| C14  | 2813.7(6)  | 1205.1(8)  | 5436.6(3) | 121.9(4)  |
| F2   | 4097.2(14) | 7168(2)    | 4523.6(5) | 128.4(9)  |



|     |            |            |           |           |
|-----|------------|------------|-----------|-----------|
| F3  | 4893.7(12) | 6017(3)    | 4712.5(5) | 123.6(8)  |
| O2  | 2405.3(8)  | 7925.5(19) | 5381.6(3) | 74.9(5)   |
| N1  | 3165.2(9)  | 7904.1(16) | 5835.8(3) | 49.3(4)   |
| N3  | 3783.0(9)  | 7288.3(16) | 5960.7(4) | 50.1(4)   |
| N6  | 3227.6(11) | 5608.3(18) | 5312.5(4) | 61.5(5)   |
| N7  | 3537.8(11) | 5335.4(19) | 5049.8(4) | 63.6(5)   |
| C1  | 4473.3(12) | 8058(2)    | 5262.3(5) | 57.1(5)   |
| C2  | 3830.7(11) | 7292.8(19) | 5172.9(4) | 50.2(5)   |
| C6  | 3491.1(11) | 6719.8(19) | 5449.6(4) | 50.0(4)   |
| C8  | 2875.9(10) | 8763.1(18) | 6019.6(4) | 46.3(4)   |
| C9  | 3965.6(11) | 6605.7(19) | 5752.3(4) | 49.6(4)   |
| C14 | 3884.8(12) | 6221(2)    | 4975.3(5) | 57.8(5)   |
| C15 | 3323.7(13) | 9408(2)    | 6229.3(5) | 66.6(6)   |
| C16 | 2953.9(12) | 4689(2)    | 5474.6(5) | 59.9(5)   |
| C20 | 4366(2)    | 9232(3)    | 5324.8(6) | 81.9(8)   |
| C23 | 2353.5(15) | 2883(3)    | 5793.0(7) | 80.3(8)   |
| C25 | 3030.4(13) | 3527(2)    | 5385.6(6) | 67.9(6)   |
| C26 | 2924.9(11) | 7570(2)    | 5541.6(4) | 51.6(5)   |
| C28 | 4557.9(14) | 5758(2)    | 5816.5(5) | 64.7(6)   |
| C29 | 1881.6(14) | 9796(3)    | 6171.3(6) | 69.8(6)   |
| C30 | 2583.3(15) | 4946(3)    | 5723.8(6) | 72.9(7)   |
| C32 | 2726.5(15) | 2655(3)    | 5544.5(7) | 77.2(7)   |
| C33 | 2153.0(12) | 8953(2)    | 5989.8(5) | 59.9(5)   |
| C34 | 2286.6(15) | 4041(3)    | 5874.4(6) | 78.9(8)   |
| C38 | 3044.2(16) | 10243(3)   | 6408.1(6) | 77.5(7)   |
| C39 | 2322.5(16) | 10443(3)   | 6379.5(6) | 71.9(7)   |
| C40 | 5154.5(14) | 7636(3)    | 5280.1(7) | 81.0(8)   |
| C44 | 4196.4(16) | 6162(3)    | 4674.7(6) | 75.2(7)   |
| C47 | 4925(3)    | 9983(4)    | 5407.1(8) | 115.9(14) |
| C49 | 5724(2)    | 8399(5)    | 5363.0(9) | 111.8(13) |
| C50 | 5593(3)    | 9556(5)    | 5424.0(9) | 131.4(19) |

**Table S10 Anisotropic Displacement Parameters ( $\text{\AA}^2 \times 10^3$ ) for Compound (*trans*)-  
3j. The Anisotropic displacement factor exponent takes the form: -  
 $2\pi^2[h^2a^{*2}U_{11}+2hka^*b^*U_{12}+\dots]$ .**

| Atom | U <sub>11</sub> | U <sub>22</sub> | U <sub>33</sub> | U <sub>23</sub> | U <sub>13</sub> | U <sub>12</sub> |
|------|-----------------|-----------------|-----------------|-----------------|-----------------|-----------------|
| C11  | 82.8(5)         | 110.3(6)        | 88.6(5)         | -5.5(4)         | 37.0(4)         | -31.0(4)        |
| Cl2  | 117.0(7)        | 55.2(4)         | 116.0(6)        | -1.4(4)         | 3.7(5)          | -5.8(4)         |
| F4   | 124.9(18)       | 213(3)          | 114.1(16)       | -8.7(16)        | 52.8(14)        | 47.7(18)        |
| O1   | 58.9(9)         | 90.3(12)        | 51.3(8)         | -5.6(8)         | -0.9(7)         | 12.5(8)         |
| N2   | 51.3(9)         | 58.5(10)        | 44.3(8)         | -3.5(7)         | 5.1(7)          | 7.0(8)          |
| N4   | 80.6(13)        | 53.4(11)        | 50.4(9)         | -6.1(8)         | 18.1(9)         | -5.5(9)         |
| N5   | 55.5(10)        | 62.1(11)        | 43.9(8)         | 2.4(7)          | 4.3(7)          | 6.8(8)          |
| N8   | 86.3(14)        | 59.1(11)        | 51.9(10)        | -7.5(8)         | 17.3(9)         | -0.1(10)        |
| C3   | 54.4(11)        | 51.5(11)        | 45.0(10)        | -0.7(8)         | 9.0(8)          | 0.0(9)          |
| C4   | 57.1(11)        | 55.0(12)        | 44.4(10)        | 2.4(8)          | 10.7(8)         | 5.6(9)          |
| C5   | 54.7(11)        | 53.6(11)        | 47.2(10)        | 4.6(8)          | 8.9(8)          | 3.5(9)          |
| C7   | 58.6(12)        | 61.9(13)        | 46.6(10)        | 5.4(9)          | 11.6(9)         | 0.2(10)         |
| C10  | 56.9(11)        | 54.5(12)        | 43.2(9)         | 1.3(8)          | 12.1(8)         | 2.9(9)          |
| C11  | 65.1(14)        | 76.7(17)        | 64.0(13)        | -14.4(12)       | 1.2(11)         | 5.0(12)         |
| C12  | 84.1(17)        | 65.2(15)        | 58.8(12)        | -8.5(11)        | 16.8(12)        | -3.8(12)        |
| C13  | 57.2(12)        | 56.0(12)        | 50.6(11)        | 2.2(9)          | 1.4(9)          | -3.7(9)         |
| C17  | 60.4(13)        | 70.4(16)        | 74.2(15)        | 13.2(12)        | -3.6(12)        | -14.8(12)       |
| C18  | 64.7(13)        | 60.1(13)        | 57.2(12)        | -0.3(10)        | -0.4(10)        | -2.4(10)        |
| C19  | 48.9(11)        | 78.0(16)        | 59.6(12)        | 5.2(11)         | 2.9(9)          | -11.4(11)       |
| C21  | 57.3(12)        | 64.2(14)        | 58.9(12)        | -0.7(10)        | 7.5(10)         | -7.0(10)        |
| C22  | 78.2(15)        | 58.7(13)        | 50.1(11)        | -2.9(9)         | 15.0(10)        | 3.9(11)         |
| C24  | 53.6(11)        | 55.6(12)        | 43.3(10)        | -0.1(8)         | 8.6(8)          | 0.6(9)          |
| C27  | 69.8(14)        | 68.1(15)        | 61.1(13)        | 8.1(11)         | 7.5(11)         | 18.1(12)        |
| C31  | 64.1(14)        | 56.9(13)        | 72.8(14)        | 4.9(11)         | -11.8(11)       | -6.3(11)        |
| C35  | 66.7(15)        | 105(2)          | 85.4(18)        | -15.1(16)       | 26.5(14)        | 13.3(15)        |
| C36  | 94(2)           | 84.8(19)        | 64.1(14)        | -12.7(13)       | 21.0(14)        | 23.4(16)        |
| C37  | 57.1(13)        | 84.8(18)        | 71.6(14)        | -18.7(13)       | 15.6(11)        | -1.0(12)        |
| C41  | 89.5(19)        | 82.7(19)        | 67.1(15)        | -22.8(13)       | 2.7(14)         | 8.1(15)         |
| C42  | 61.8(14)        | 86.1(19)        | 80.0(16)        | 17.6(14)        | 12.7(12)        | 9.2(13)         |
| C43  | 119(3)          | 81(2)           | 67.8(16)        | -13.0(14)       | 10.5(17)        | -24.5(19)       |
| C45  | 60.6(15)        | 131(3)          | 91(2)           | 30(2)           | 0.0(14)         | -10.3(18)       |
| C46  | 99(3)           | 109(3)          | 78.2(18)        | 5.1(18)         | -6.3(17)        | -31(2)          |
| C48  | 108(2)          | 85(2)           | 69.2(16)        | -1.0(14)        | 39.3(16)        | 6.4(17)         |
| Cl3  | 161.0(10)       | 147.7(9)        | 112.1(7)        | -28.5(6)        | 79.8(7)         | -74.2(8)        |
| Cl4  | 129.2(8)        | 65.6(5)         | 173.0(10)       | 4.4(5)          | 27.4(7)         | 6.0(5)          |
| F2   | 163(2)          | 150.4(19)       | 83.3(11)        | 38.2(12)        | 61.9(12)        | 56.9(16)        |
| F3   | 98.9(14)        | 171(2)          | 109.3(14)       | -13.3(13)       | 48.3(11)        | 36.5(14)        |

|     |           |           |           |           |           |           |
|-----|-----------|-----------|-----------|-----------|-----------|-----------|
| O2  | 51.8(8)   | 123.1(16) | 47.2(8)   | -17.9(9)  | -4.4(7)   | 24.1(9)   |
| N1  | 45.1(8)   | 62.7(11)  | 39.6(8)   | -4.7(7)   | 3.0(6)    | 8.4(7)    |
| N3  | 50.0(9)   | 59.0(10)  | 40.6(8)   | 1.4(7)    | 2.5(7)    | 7.7(7)    |
| N6  | 71.1(12)  | 66.5(12)  | 49.2(9)   | -11.4(8)  | 16.5(8)   | -8.2(9)   |
| N7  | 73.4(12)  | 70.3(13)  | 48.6(9)   | -11.6(8)  | 13.7(9)   | 1.0(10)   |
| C1  | 61.7(12)  | 68.9(14)  | 40.6(9)   | 5.1(9)    | 6.0(9)    | -1.4(10)  |
| C2  | 50.1(10)  | 61.3(12)  | 39.5(9)   | 0.8(8)    | 6.7(8)    | 9.5(9)    |
| C6  | 49.4(10)  | 59.7(12)  | 41.6(9)   | -4.4(8)   | 7.7(8)    | 3.9(9)    |
| C8  | 48.9(10)  | 52.2(11)  | 38.1(8)   | 0.8(7)    | 7.2(7)    | 2.2(8)    |
| C9  | 50.5(10)  | 53.5(11)  | 45.7(10)  | 3.4(8)    | 9.5(8)    | 4.9(9)    |
| C14 | 60.0(12)  | 69.7(14)  | 44.7(10)  | -4.8(9)   | 10.1(9)   | 8.0(10)   |
| C15 | 58.7(13)  | 79.5(17)  | 58.5(12)  | -16.7(11) | -6.0(10)  | 7.0(11)   |
| C16 | 58.9(12)  | 67.8(14)  | 51.7(11)  | -5.1(10)  | 1.5(9)    | -7.6(10)  |
| C20 | 112(2)    | 71.9(17)  | 64.2(14)  | -8.9(12)  | 22.5(14)  | -10.9(16) |
| C23 | 72.3(16)  | 86(2)     | 80.5(17)  | 11.7(14)  | 0.2(14)   | -20.8(14) |
| C25 | 60.9(13)  | 71.8(16)  | 69.6(14)  | -1.5(12)  | 2.6(11)   | 1.7(11)   |
| C26 | 43.8(10)  | 70.8(13)  | 40.3(9)   | -6.9(9)   | 4.9(8)    | 4.3(9)    |
| C28 | 71.4(14)  | 66.4(14)  | 56.3(12)  | 4.9(10)   | 7.6(10)   | 22.0(12)  |
| C29 | 56.2(13)  | 79.7(17)  | 76.8(15)  | -16.0(13) | 21.1(11)  | 5.5(12)   |
| C30 | 75.7(16)  | 80.7(17)  | 65.0(14)  | -10.4(12) | 19.3(12)  | -21.5(13) |
| C32 | 70.2(16)  | 67.0(16)  | 90.3(18)  | 6.6(13)   | -7.9(14)  | -3.9(12)  |
| C33 | 49.6(11)  | 68.6(14)  | 63.3(12)  | -15.3(10) | 13.7(9)   | -3.1(10)  |
| C34 | 73.5(16)  | 101(2)    | 63.5(14)  | -3.2(14)  | 13.0(12)  | -29.9(15) |
| C38 | 83.8(18)  | 80.8(18)  | 64.1(14)  | -23.9(13) | -6.1(13)  | 6.0(14)   |
| C39 | 84.1(17)  | 74.5(16)  | 58.5(13)  | -14.9(11) | 14.3(12)  | 14.8(13)  |
| C40 | 57.3(14)  | 105(2)    | 78.9(16)  | 19.1(15)  | -1.3(12)  | -1.9(14)  |
| C44 | 83.9(18)  | 87.5(19)  | 58.3(13)  | -6.7(13)  | 26.1(12)  | 12.3(14)  |
| C47 | 163(4)    | 109(3)    | 77(2)     | -17.1(18) | 18(2)     | -50(3)    |
| C49 | 76(2)     | 157(4)    | 96(2)     | 35(2)     | -12.0(17) | -31(2)    |
| C50 | 147(4)    | 164(4)    | 76(2)     | 12(2)     | -18(2)    | -79(4)    |
| F4  | 124.9(18) | 213(3)    | 114.1(16) | -8.7(16)  | 52.8(14)  | 47.7(18)  |

**Table S11 Bond Lengths for Compound (*trans*)-3j.**

| Atom | Atom | Length/Å | Atom | Atom | Length/Å |
|------|------|----------|------|------|----------|
| C11  | C19  | 1.730(3) | C13  | C34  | 1.727(3) |
| C12  | C31  | 1.734(3) | C14  | C32  | 1.728(3) |
| F1   | C48  | 1.331(4) | F2   | C44  | 1.322(4) |
| F4   | C48  | 1.279(4) | F3   | C44  | 1.325(4) |
| O1   | C24  | 1.206(3) | O2   | C26  | 1.208(3) |
| N2   | N5   | 1.414(2) | N1   | N3   | 1.418(2) |
| N2   | C10  | 1.420(3) | N1   | C8   | 1.416(2) |
| N2   | C24  | 1.364(3) | N1   | C26  | 1.362(2) |
| N4   | N8   | 1.370(3) | N3   | C9   | 1.274(3) |
| N4   | C3   | 1.460(3) | N6   | N7   | 1.384(3) |
| N4   | C13  | 1.400(3) | N6   | C6   | 1.461(3) |
| N5   | C5   | 1.277(3) | N6   | C16  | 1.397(3) |
| N8   | C22  | 1.274(3) | N7   | C14  | 1.267(3) |
| C3   | C4   | 1.576(3) | C1   | C2   | 1.512(3) |
| C3   | C5   | 1.510(3) | C1   | C20  | 1.383(4) |
| C3   | C24  | 1.541(3) | C1   | C40  | 1.374(4) |
| C4   | C7   | 1.513(3) | C2   | C6   | 1.575(3) |
| C4   | C22  | 1.506(3) | C2   | C14  | 1.503(3) |
| C5   | C27  | 1.485(3) | C6   | C9   | 1.511(3) |
| C7   | C12  | 1.385(4) | C6   | C26  | 1.535(3) |
| C7   | C42  | 1.386(4) | C8   | C15  | 1.382(3) |
| C10  | C11  | 1.374(3) | C8   | C33  | 1.381(3) |
| C10  | C37  | 1.378(3) | C9   | C28  | 1.482(3) |
| C11  | C41  | 1.377(4) | C14  | C44  | 1.503(3) |
| C12  | C43  | 1.382(4) | C15  | C38  | 1.376(4) |
| C13  | C18  | 1.389(3) | C16  | C25  | 1.389(4) |
| C13  | C21  | 1.396(3) | C16  | C30  | 1.394(3) |
| C17  | C19  | 1.370(4) | C20  | C47  | 1.377(5) |
| C17  | C31  | 1.391(4) | C23  | C32  | 1.388(4) |
| C18  | C31  | 1.380(4) | C23  | C34  | 1.373(4) |
| C19  | C21  | 1.383(3) | C25  | C32  | 1.376(4) |
| C22  | C48  | 1.500(3) | C29  | C33  | 1.382(3) |
| C35  | C36  | 1.366(4) | C29  | C39  | 1.372(4) |
| C35  | C37  | 1.388(4) | C30  | C34  | 1.378(4) |
| C36  | C41  | 1.380(4) | C38  | C39  | 1.380(4) |
| C42  | C45  | 1.416(5) | C40  | C49  | 1.401(5) |
| C43  | C46  | 1.336(5) | C47  | C50  | 1.353(7) |
| C45  | C46  | 1.373(6) | C49  | C50  | 1.371(7) |

**Table S12 Bond Angles for Compound (*trans*)-3j.**

| Atom | Atom | Atom | Angle/°    | Atom | Atom | Atom | Angle/°    |
|------|------|------|------------|------|------|------|------------|
| N5   | N2   | C10  | 118.31(16) | C8   | N1   | N3   | 118.91(15) |
| C24  | N2   | N5   | 113.21(16) | C26  | N1   | N3   | 113.06(16) |
| C24  | N2   | C10  | 128.44(18) | C26  | N1   | C8   | 128.03(17) |
| N8   | N4   | C3   | 112.68(18) | C9   | N3   | N1   | 108.13(15) |
| N8   | N4   | C13  | 118.83(19) | N7   | N6   | C6   | 111.92(18) |
| C13  | N4   | C3   | 125.75(17) | N7   | N6   | C16  | 118.15(19) |
| C5   | N5   | N2   | 108.22(16) | C16  | N6   | C6   | 124.82(17) |
| C22  | N8   | N4   | 108.82(19) | C14  | N7   | N6   | 108.66(19) |
| N4   | C3   | C4   | 101.34(15) | C20  | C1   | C2   | 118.2(2)   |
| N4   | C3   | C5   | 114.67(17) | C40  | C1   | C2   | 122.7(2)   |
| N4   | C3   | C24  | 116.49(18) | C40  | C1   | C20  | 119.1(3)   |
| C5   | C3   | C4   | 116.28(17) | C1   | C2   | C6   | 115.68(15) |
| C5   | C3   | C24  | 100.84(16) | C14  | C2   | C1   | 120.38(18) |
| C24  | C3   | C4   | 107.71(17) | C14  | C2   | C6   | 99.54(17)  |
| C7   | C4   | C3   | 115.52(16) | N6   | C6   | C2   | 101.34(15) |
| C22  | C4   | C3   | 99.68(17)  | N6   | C6   | C9   | 114.96(18) |
| C22  | C4   | C7   | 120.18(19) | N6   | C6   | C26  | 115.81(18) |
| N5   | C5   | C3   | 112.62(18) | C9   | C6   | C2   | 116.56(17) |
| N5   | C5   | C27  | 122.11(19) | C9   | C6   | C26  | 100.92(15) |
| C27  | C5   | C3   | 125.16(19) | C26  | C6   | C2   | 107.69(17) |
| C12  | C7   | C4   | 118.4(2)   | C15  | C8   | N1   | 119.36(19) |
| C12  | C7   | C42  | 118.8(3)   | C33  | C8   | N1   | 120.26(18) |
| C42  | C7   | C4   | 122.7(2)   | C33  | C8   | C15  | 120.4(2)   |
| C11  | C10  | N2   | 118.9(2)   | N3   | C9   | C6   | 112.63(17) |
| C11  | C10  | C37  | 120.2(2)   | N3   | C9   | C28  | 121.81(18) |
| C37  | C10  | N2   | 120.9(2)   | C28  | C9   | C6   | 125.48(18) |
| C10  | C11  | C41  | 119.7(2)   | N7   | C14  | C2   | 115.09(19) |
| C43  | C12  | C7   | 121.2(3)   | N7   | C14  | C44  | 117.3(2)   |
| C18  | C13  | N4   | 119.9(2)   | C44  | C14  | C2   | 126.7(2)   |
| C18  | C13  | C21  | 120.4(2)   | C38  | C15  | C8   | 119.5(2)   |
| C21  | C13  | N4   | 119.7(2)   | C25  | C16  | N6   | 120.9(2)   |
| C19  | C17  | C31  | 117.2(2)   | C25  | C16  | C30  | 119.8(2)   |
| C31  | C18  | C13  | 118.4(2)   | C30  | C16  | N6   | 119.4(2)   |
| C17  | C19  | C11  | 118.69(19) | C47  | C20  | C1   | 121.5(4)   |
| C17  | C19  | C21  | 122.6(2)   | C34  | C23  | C32  | 116.9(3)   |
| C21  | C19  | C11  | 118.7(2)   | C32  | C25  | C16  | 118.7(3)   |
| C19  | C21  | C13  | 118.8(2)   | O2   | C26  | N1   | 127.4(2)   |
| N8   | C22  | C4   | 114.8(2)   | O2   | C26  | C6   | 127.59(18) |
| N8   | C22  | C48  | 117.6(2)   | N1   | C26  | C6   | 104.80(16) |
| C48  | C22  | C4   | 126.4(2)   | C39  | C29  | C33  | 120.7(2)   |

|     |     |     |            |     |     |     |          |
|-----|-----|-----|------------|-----|-----|-----|----------|
| O1  | C24 | N2  | 128.0(2)   | C34 | C30 | C16 | 119.2(3) |
| O1  | C24 | C3  | 127.23(19) | C23 | C32 | C14 | 117.7(2) |
| N2  | C24 | C3  | 104.58(17) | C25 | C32 | C14 | 119.4(3) |
| C17 | C31 | C12 | 118.4(2)   | C25 | C32 | C23 | 122.9(3) |
| C18 | C31 | C12 | 118.9(2)   | C8  | C33 | C29 | 119.3(2) |
| C18 | C31 | C17 | 122.7(2)   | C23 | C34 | C13 | 118.0(2) |
| C36 | C35 | C37 | 120.4(3)   | C23 | C34 | C30 | 122.5(3) |
| C35 | C36 | C41 | 119.7(2)   | C30 | C34 | C13 | 119.5(3) |
| C10 | C37 | C35 | 119.5(2)   | C15 | C38 | C39 | 120.6(2) |
| C11 | C41 | C36 | 120.4(3)   | C29 | C39 | C38 | 119.5(2) |
| C7  | C42 | C45 | 118.5(3)   | C1  | C40 | C49 | 119.5(4) |
| C46 | C43 | C12 | 120.3(3)   | F2  | C44 | F3  | 104.5(3) |
| C46 | C45 | C42 | 120.5(3)   | F2  | C44 | C14 | 110.3(2) |
| C43 | C46 | C45 | 120.5(3)   | F3  | C44 | C14 | 112.9(2) |
| F1  | C48 | C22 | 108.9(2)   | C50 | C47 | C20 | 118.8(4) |
| F4  | C48 | F1  | 106.3(3)   | C50 | C49 | C40 | 119.5(4) |
| F4  | C48 | C22 | 115.4(3)   | C47 | C50 | C49 | 121.7(4) |

**Table S13 Torsion Angles for Compound (*trans*)-3j.**

| A   | B   | C   | D   | Angle/°     | A  | B   | C   | D   | Angle/°     |
|-----|-----|-----|-----|-------------|----|-----|-----|-----|-------------|
| C11 | C19 | C21 | C13 | 179.79(17)  | N1 | N3  | C9  | C6  | 2.1(2)      |
| N2  | N5  | C5  | C3  | -2.4(2)     | N1 | N3  | C9  | C28 | -174.6(2)   |
| N2  | N5  | C5  | C27 | 173.9(2)    | N1 | C8  | C15 | C38 | 180.0(2)    |
| N2  | C10 | C11 | C41 | 178.5(2)    | N1 | C8  | C33 | C29 | -179.9(2)   |
| N2  | C10 | C37 | C35 | -178.3(3)   | N3 | N1  | C8  | C15 | 32.4(3)     |
| N4  | N8  | C22 | C4  | 3.4(3)      | N3 | N1  | C8  | C33 | -147.5(2)   |
| N4  | N8  | C22 | C48 | 171.9(2)    | N3 | N1  | C26 | O2  | 178.4(2)    |
| N4  | C3  | C4  | C7  | 145.27(19)  | N3 | N1  | C26 | C6  | -6.1(2)     |
| N4  | C3  | C4  | C22 | 15.0(2)     | N6 | N7  | C14 | C2  | -3.2(3)     |
| N4  | C3  | C5  | N5  | 131.9(2)    | N6 | N7  | C14 | C44 | -173.2(2)   |
| N4  | C3  | C5  | C27 | -44.4(3)    | N6 | C6  | C9  | N3  | -130.8(2)   |
| N4  | C3  | C24 | O1  | 52.3(3)     | N6 | C6  | C9  | C28 | 45.7(3)     |
| N4  | C3  | C24 | N2  | -131.69(18) | N6 | C6  | C26 | O2  | -53.1(3)    |
| N4  | C13 | C18 | C31 | 179.3(2)    | N6 | C6  | C26 | N1  | 131.35(18)  |
| N4  | C13 | C21 | C19 | -178.4(2)   | N6 | C16 | C25 | C32 | -177.3(2)   |
| N5  | N2  | C10 | C11 | -32.0(3)    | N6 | C16 | C30 | C34 | 177.1(2)    |
| N5  | N2  | C10 | C37 | 147.3(2)    | N7 | N6  | C6  | C2  | 17.4(2)     |
| N5  | N2  | C24 | O1  | -177.7(2)   | N7 | N6  | C6  | C9  | -109.2(2)   |
| N5  | N2  | C24 | C3  | 6.3(2)      | N7 | N6  | C6  | C26 | 133.62(19)  |
| N8  | N4  | C3  | C4  | -15.3(2)    | N7 | N6  | C16 | C25 | 3.9(3)      |
| N8  | N4  | C3  | C5  | 110.8(2)    | N7 | N6  | C16 | C30 | -174.4(2)   |
| N8  | N4  | C3  | C24 | -131.8(2)   | N7 | C14 | C44 | F2  | 136.9(3)    |
| N8  | N4  | C13 | C18 | 0.4(3)      | N7 | C14 | C44 | F3  | -106.6(3)   |
| N8  | N4  | C13 | C21 | 178.8(2)    | C1 | C2  | C6  | N6  | -147.46(19) |
| N8  | C22 | C48 | F1  | -132.1(3)   | C1 | C2  | C6  | C9  | -21.9(3)    |
| N8  | C22 | C48 | F4  | 108.4(4)    | C1 | C2  | C6  | C26 | 90.5(2)     |
| C3  | N4  | N8  | C22 | 8.4(3)      | C1 | C2  | C14 | N7  | 140.9(2)    |
| C3  | N4  | C13 | C18 | 160.2(2)    | C1 | C2  | C14 | C44 | -50.3(3)    |
| C3  | N4  | C13 | C21 | -21.4(3)    | C1 | C20 | C47 | C50 | 0.6(5)      |
| C3  | C4  | C7  | C12 | 85.6(2)     | C1 | C40 | C49 | C50 | -0.2(5)     |
| C3  | C4  | C7  | C42 | -94.3(3)    | C2 | C1  | C20 | C47 | -179.9(3)   |
| C3  | C4  | C22 | N8  | -12.2(3)    | C2 | C1  | C40 | C49 | 179.7(2)    |
| C3  | C4  | C22 | C48 | -179.6(3)   | C2 | C6  | C9  | N3  | 110.8(2)    |
| C4  | C3  | C5  | N5  | -110.2(2)   | C2 | C6  | C9  | C28 | -72.6(3)    |
| C4  | C3  | C5  | C27 | 73.6(3)     | C2 | C6  | C26 | O2  | 59.4(3)     |
| C4  | C3  | C24 | O1  | -60.6(3)    | C2 | C6  | C26 | N1  | -116.11(19) |
| C4  | C3  | C24 | N2  | 115.37(18)  | C2 | C14 | C44 | F2  | -31.7(4)    |
| C4  | C7  | C12 | C43 | -179.3(2)   | C2 | C14 | C44 | F3  | 84.8(3)     |
| C4  | C7  | C42 | C45 | 179.3(2)    | C6 | N6  | N7  | C14 | -10.0(3)    |
| C4  | C22 | C48 | F1  | 34.9(4)     | C6 | N6  | C16 | C25 | -148.7(2)   |

|     |     |     |     |             |     |     |     |     |             |
|-----|-----|-----|-----|-------------|-----|-----|-----|-----|-------------|
| C4  | C22 | C48 | F4  | -84.6(4)    | C6  | N6  | C16 | C30 | 33.0(3)     |
| C5  | C3  | C4  | C7  | 20.3(3)     | C6  | C2  | C14 | N7  | 13.4(2)     |
| C5  | C3  | C4  | C22 | -110.0(2)   | C6  | C2  | C14 | C44 | -177.7(2)   |
| C5  | C3  | C24 | O1  | 177.1(2)    | C8  | N1  | N3  | C9  | -177.09(18) |
| C5  | C3  | C24 | N2  | -6.9(2)     | C8  | N1  | C26 | O2  | -1.8(4)     |
| C7  | C4  | C22 | N8  | -139.4(2)   | C8  | N1  | C26 | C6  | 173.74(19)  |
| C7  | C4  | C22 | C48 | 53.2(4)     | C8  | C15 | C38 | C39 | 0.0(4)      |
| C7  | C12 | C43 | C46 | 0.1(4)      | C9  | C6  | C26 | O2  | -177.9(3)   |
| C7  | C42 | C45 | C46 | -0.1(4)     | C9  | C6  | C26 | N1  | 6.5(2)      |
| C10 | N2  | N5  | C5  | 179.41(19)  | C14 | C2  | C6  | N6  | -16.93(19)  |
| C10 | N2  | C24 | O1  | -0.1(4)     | C14 | C2  | C6  | C9  | 108.6(2)    |
| C10 | N2  | C24 | C3  | -176.1(2)   | C14 | C2  | C6  | C26 | -138.94(17) |
| C10 | C11 | C41 | C36 | 0.2(5)      | C15 | C8  | C33 | C29 | 0.2(4)      |
| C11 | C10 | C37 | C35 | 1.0(4)      | C15 | C38 | C39 | C29 | 0.2(5)      |
| C12 | C7  | C42 | C45 | -0.5(4)     | C16 | N6  | N7  | C14 | -165.9(2)   |
| C12 | C43 | C46 | C45 | -0.8(5)     | C16 | N6  | C6  | C2  | 171.5(2)    |
| C13 | N4  | N8  | C22 | 170.7(2)    | C16 | N6  | C6  | C9  | 44.9(3)     |
| C13 | N4  | C3  | C4  | -176.2(2)   | C16 | N6  | C6  | C26 | -72.3(3)    |
| C13 | N4  | C3  | C5  | -50.1(3)    | C16 | C25 | C32 | C14 | 179.82(19)  |
| C13 | N4  | C3  | C24 | 67.3(3)     | C16 | C25 | C32 | C23 | -0.9(4)     |
| C13 | C18 | C31 | C12 | 178.75(18)  | C16 | C30 | C34 | C13 | -178.2(2)   |
| C13 | C18 | C31 | C17 | -0.7(4)     | C16 | C30 | C34 | C23 | 1.4(4)      |
| C17 | C19 | C21 | C13 | -1.1(4)     | C20 | C1  | C2  | C6  | -87.1(2)    |
| C18 | C13 | C21 | C19 | 0.0(3)      | C20 | C1  | C2  | C14 | 153.2(2)    |
| C19 | C17 | C31 | C12 | -179.78(18) | C20 | C1  | C40 | C49 | 0.4(4)      |
| C19 | C17 | C31 | C18 | -0.3(4)     | C20 | C47 | C50 | C49 | -0.4(6)     |
| C21 | C13 | C18 | C31 | 0.9(3)      | C25 | C16 | C30 | C34 | -1.2(4)     |
| C22 | C4  | C7  | C12 | -154.8(2)   | C26 | N1  | N3  | C9  | 2.7(3)      |
| C22 | C4  | C7  | C42 | 25.3(3)     | C26 | N1  | C8  | C15 | -147.4(2)   |
| C24 | N2  | N5  | C5  | -2.8(3)     | C26 | N1  | C8  | C33 | 32.7(3)     |
| C24 | N2  | C10 | C11 | 150.6(2)    | C26 | C6  | C9  | N3  | -5.5(2)     |
| C24 | N2  | C10 | C37 | -30.1(3)    | C26 | C6  | C9  | C28 | 171.1(2)    |
| C24 | C3  | C4  | C7  | -91.9(2)    | C30 | C16 | C25 | C32 | 0.9(4)      |
| C24 | C3  | C4  | C22 | 137.78(18)  | C32 | C23 | C34 | C13 | 178.4(2)    |
| C24 | C3  | C5  | N5  | 5.9(2)      | C32 | C23 | C34 | C30 | -1.2(4)     |
| C24 | C3  | C5  | C27 | -170.3(2)   | C33 | C8  | C15 | C38 | -0.2(4)     |
| C31 | C17 | C19 | C11 | -179.64(18) | C33 | C29 | C39 | C38 | -0.2(4)     |
| C31 | C17 | C19 | C21 | 1.2(4)      | C34 | C23 | C32 | C14 | -179.7(2)   |
| C35 | C36 | C41 | C11 | 0.1(5)      | C34 | C23 | C32 | C25 | 1.0(4)      |
| C36 | C35 | C37 | C10 | -0.7(5)     | C39 | C29 | C33 | C8  | 0.0(4)      |
| C37 | C10 | C11 | C41 | -0.8(4)     | C40 | C1  | C2  | C6  | 93.6(3)     |
| C37 | C35 | C36 | C41 | 0.1(5)      | C40 | C1  | C2  | C14 | -26.0(3)    |
| C42 | C7  | C12 | C43 | 0.6(4)      | C40 | C1  | C20 | C47 | -0.6(4)     |



|     |     |     |     |        |     |     |     |     |        |
|-----|-----|-----|-----|--------|-----|-----|-----|-----|--------|
| C42 | C45 | C46 | C43 | 0.8(5) | C40 | C49 | C50 | C47 | 0.2(6) |
|-----|-----|-----|-----|--------|-----|-----|-----|-----|--------|

**Table S14 Hydrogen Atom Coordinates ( $\text{\AA}\times 10^4$ ) and Isotropic Displacement Parameters ( $\text{\AA}^2\times 10^3$ ) for Compound (*trans*)-3j.**

| Atom | x       | y        | z       | U(eq) |
|------|---------|----------|---------|-------|
| H4   | 3949.34 | 4671.31  | 7436.52 | 62    |
| H11  | 3702.44 | 3115.86  | 6257.34 | 83    |
| H12  | 3536.98 | 2922.18  | 7182.8  | 82    |
| H17  | 5263.56 | 10178.95 | 6599.41 | 83    |
| H18  | 4212.98 | 9104.91  | 7301.78 | 74    |
| H21  | 4775.69 | 6761.85  | 6679.94 | 72    |
| H27A | 2654.65 | 6496.28  | 6450.95 | 100   |
| H27B | 2998.56 | 7385.89  | 6700    | 100   |
| H27C | 2480.58 | 6410.9   | 6792.89 | 100   |
| H35  | 6133.24 | 2669.47  | 6358.99 | 101   |
| H36  | 5431.94 | 1568.42  | 6001.41 | 96    |
| H37  | 5623.41 | 3995.48  | 6670.98 | 85    |
| H41  | 4215.62 | 1791     | 5950.81 | 96    |
| H42  | 2156.53 | 5540.43  | 7257.38 | 91    |
| H43  | 2614.41 | 1648.26  | 7040.04 | 107   |
| H45  | 1231.91 | 4205.09  | 7110.49 | 114   |
| H46  | 1480.41 | 2287.8   | 6998.56 | 116   |
| H48  | 3420.31 | 6959.95  | 7937.81 | 102   |
| H2   | 3466.72 | 7799.02  | 5062.68 | 60    |
| H15  | 3810.3  | 9277.35  | 6249.41 | 80    |
| H20  | 3905.27 | 9521.26  | 5310.96 | 98    |
| H23  | 2157.89 | 2279.99  | 5899.39 | 96    |
| H25  | 3282.18 | 3342.71  | 5221.8  | 81    |
| H28A | 4930.85 | 5961.91  | 5695.88 | 97    |
| H28B | 4391.23 | 4979.34  | 5763.05 | 97    |
| H28C | 4735.19 | 5784.98  | 6032.2  | 97    |
| H29  | 1395.12 | 9927.44  | 6152.12 | 84    |
| H30  | 2536.95 | 5719.95  | 5787.47 | 88    |
| H33  | 1851.75 | 8516.76  | 5849.04 | 72    |
| H38  | 3344.14 | 10678.42 | 6549.58 | 93    |
| H39  | 2136.58 | 11010.67 | 6500.53 | 86    |
| H40  | 5236.62 | 6850.43  | 5237.5  | 97    |
| H44  | 3973.13 | 5521.03  | 4547.72 | 90    |
| H47  | 4845.28 | 10769.34 | 5450.35 | 139   |
| H49  | 6187.94 | 8123.56  | 5376.53 | 134   |
| H50  | 5973.48 | 10060.36 | 5478.34 | 158   |

## X-Ray Crystallographic Data of Compound (*cis*)-**3j**

Thermal ellipsoids are set at a 50% probability level. Crystal data have been deposited to CCDC, number 2253537.

### Crystallization Details

The obtained compound (*cis*)-**3j** (35 mg) was dissolved in THF (0.2 mL) in a NMR tube at room temperature. Then petroleum ether (2 mL) was added to the solution slowly along the tube wall, resulting in a two-phase mixture. The colorless crystal of (*cis*)-**3j** was formed after the two-phase mixture has diffused.

### Experimental

A suitable crystal was selected and placed on a ROD, Synergy Custom system, HyPix diffractometer. The crystal was kept at 274.7(3) K during data collection. Using Olex2 [1], the structure was solved with the SHELXT [2] structure solution program using Intrinsic Phasing and refined with the SHELXL [3] refinement package using Least Squares minimisation.

### Crystal structure determination

Crystal Data for for for  $C_{25}H_{18}Cl_2F_2N_4O$  ( $M=499.33$  g/mol): monoclinic, space group  $P2_1/c$  (no. 14),  $a = 19.8243(4)$  Å,  $b = 7.18030(10)$  Å,  $c = 16.7155(3)$  Å,  $\beta = 104.020(2)^\circ$ ,  $V = 2308.48(7)$  Å<sup>3</sup>,  $Z = 4$ ,  $T = 274.7(3)$  K,  $\mu(\text{Cu K}\alpha) = 2.899$  mm<sup>-1</sup>,  $D_{\text{calc}} = 1.437$  g/cm<sup>3</sup>, 14610 reflections measured ( $10.764^\circ \leq 2\theta \leq 152.764^\circ$ ), 4553 unique ( $R_{\text{int}} = 0.0407$ ,  $R_{\text{sigma}} = 0.0266$ ) which were used in all calculations. The final  $R_1$  was 0.0533 ( $I > 2\sigma(I)$ ) and  $wR_2$  was 0.1410 (all data).

### Refinement model description

Number of restraints - 0, number of constraints - unknown.

Details:

#### 1. Fixed Uiso

At 1.2 times of:

All C(H) groups

At 1.5 times of:

All C(H,H,H) groups

2.a Ternary CH refined with riding coordinates:

C8(H8), C17(H17)

3.b Aromatic/amide H refined with riding coordinates:

C2(H2), C6(H6), C13(H13), C14(H14), C16(H16), C18(H18), C19(H19),  
C20(H20),

C21(H21), C22(H22), C23(H23), C24(H24), C25(H25)

4.c Idealised Me refined as rotating group:

C15(H15A,H15B,H15C)

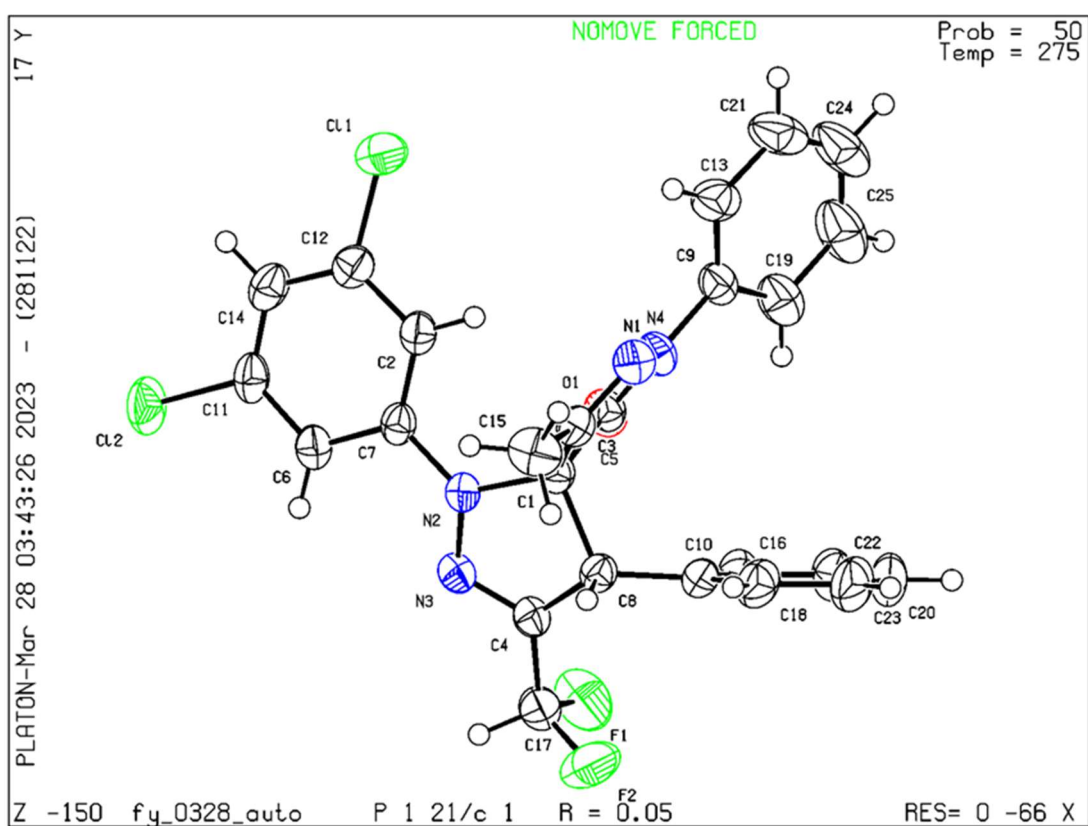

**Table S15 Crystal data and structure refinement for Compound (*cis*)-3j.**

|                                             |                                                                                 |
|---------------------------------------------|---------------------------------------------------------------------------------|
| Identification code                         | FY_0328_auto                                                                    |
| Empirical formula                           | C <sub>25</sub> H <sub>18</sub> Cl <sub>2</sub> F <sub>2</sub> N <sub>4</sub> O |
| Formula weight                              | 499.33                                                                          |
| Temperature/K                               | 274.7(3)                                                                        |
| Crystal system                              | monoclinic                                                                      |
| Space group                                 | P21/c                                                                           |
| a/Å                                         | 19.8243(4)                                                                      |
| b/Å                                         | 7.18030(10)                                                                     |
| c/Å                                         | 16.7155(3)                                                                      |
| α/°                                         | 90                                                                              |
| β/°                                         | 104.020(2)                                                                      |
| γ/°                                         | 90                                                                              |
| Volume/Å <sup>3</sup>                       | 2308.48(7)                                                                      |
| Z                                           | 4                                                                               |
| ρ <sub>calc</sub> /cm <sup>3</sup>          | 1.437                                                                           |
| μ/mm <sup>-1</sup>                          | 2.899                                                                           |
| F(000)                                      | 1024.0                                                                          |
| Crystal size/mm <sup>3</sup>                | 0.18 × 0.15 × 0.12                                                              |
| Radiation                                   | Cu Kα (λ = 1.54184)                                                             |
| 2θ range for data collection/°              | 10.764 to 152.764                                                               |
| Index ranges                                | -25 ≤ h ≤ 22, -8 ≤ k ≤ 8, -16 ≤ l ≤ 20                                          |
| Reflections collected                       | 14610                                                                           |
| Independent reflections                     | 4553 [R <sub>int</sub> = 0.0407, R <sub>sigma</sub> = 0.0266]                   |
| Data/restraints/parameters                  | 4553/0/308                                                                      |
| Goodness-of-fit on F <sup>2</sup>           | 1.074                                                                           |
| Final R indexes [I ≥ 2σ (I)]                | R <sub>1</sub> = 0.0533, wR <sub>2</sub> = 0.1391                               |
| Final R indexes [all data]                  | R <sub>1</sub> = 0.0551, wR <sub>2</sub> = 0.1410                               |
| Largest diff. peak/hole / e Å <sup>-3</sup> | 0.36/-0.56                                                                      |

**Table S16 Fractional Atomic Coordinates ( $\times 10^4$ ) and Equivalent Isotropic Displacement Parameters ( $\text{\AA}^2 \times 10^3$ ) for Compound (*cis*)-3j.  $U_{eq}$  is defined as 1/3 of the trace of the orthogonalised UIJ tensor.**

| Atom | x          | y          | z          | U(eq)     |
|------|------------|------------|------------|-----------|
| C11  | 4963.4(3)  | 3795.5(8)  | 4033.3(3)  | 57.60(18) |
| C12  | 4580.3(3)  | 3939.5(8)  | 740.4(3)   | 58.70(18) |
| F1   | 787.6(8)   | 6250(2)    | 818.8(9)   | 76.7(5)   |
| F2   | 816.0(8)   | 9263(3)    | 899.3(10)  | 81.3(5)   |
| O1   | 2189.2(7)  | 4168.5(16) | 2978.6(8)  | 40.9(3)   |
| N1   | 2949.5(8)  | 7782(2)    | 4283.8(9)  | 37.4(3)   |
| N2   | 2886.3(7)  | 7087(2)    | 2181.8(8)  | 33.7(3)   |
| N3   | 2384.5(7)  | 7010(2)    | 1442.0(8)  | 34.7(3)   |
| N4   | 2603.3(8)  | 6043.5(19) | 4118.8(9)  | 35.8(3)   |
| C1   | 2566.4(8)  | 7418(2)    | 2871.4(9)  | 29.8(3)   |
| C2   | 3893.4(9)  | 5513(2)    | 3017.4(11) | 36.3(4)   |
| C3   | 2418.6(8)  | 5625(2)    | 3297.9(10) | 31.7(3)   |
| C4   | 1815.7(9)  | 7651(2)    | 1561.2(10) | 34.9(3)   |
| C5   | 2961.1(8)  | 8545(2)    | 3597.3(10) | 33.6(3)   |
| C6   | 3709.9(9)  | 5581(2)    | 1533.9(11) | 36.3(4)   |
| C7   | 3495.8(8)  | 6044(2)    | 2245.2(10) | 32.5(3)   |
| C8   | 1873.8(8)  | 8408(2)    | 2418.3(10) | 32.8(3)   |
| C9   | 2554.4(10) | 4893(2)    | 4790.7(10) | 37.6(4)   |
| C10  | 1282.8(8)  | 8218(3)    | 2837.1(10) | 37.1(4)   |
| C11  | 4317.5(10) | 4571(2)    | 1622.4(11) | 40.1(4)   |
| C12  | 4496.4(9)  | 4497(2)    | 3064.8(11) | 39.4(4)   |
| C13  | 3099.1(12) | 4852(3)    | 5487.7(12) | 50.0(5)   |
| C14  | 4721.7(10) | 4004(3)    | 2377.6(12) | 43.0(4)   |
| C15  | 3301.5(11) | 10367(3)   | 3545.3(13) | 50.1(5)   |
| C16  | 860.0(10)  | 6649(3)    | 2743.4(12) | 47.4(4)   |
| C17  | 1200.0(10) | 7752(3)    | 834.7(12)  | 46.2(4)   |
| C18  | 1175.0(11) | 9630(3)    | 3355.4(12) | 50.7(5)   |
| C19  | 1958.6(13) | 3858(3)    | 4747.7(14) | 52.6(5)   |
| C20  | 245.5(11)  | 7922(5)    | 3687.9(14) | 68.1(7)   |
| C21  | 3032.5(17) | 3787(3)    | 6154.6(14) | 64.4(7)   |
| C22  | 342.4(11)  | 6513(4)    | 3171.5(14) | 61.2(6)   |
| C23  | 657.5(13)  | 9477(4)    | 3782.4(14) | 67.0(7)   |
| C24  | 2441.3(19) | 2766(3)    | 6122.5(15) | 72.1(8)   |
| C25  | 1912.9(17) | 2785(3)    | 5422.3(17) | 70.5(7)   |

**Table 17 Anisotropic Displacement Parameters ( $\text{\AA}^2 \times 10^3$ ) for Compound (*cis*)-3j. The Anisotropic displacement factor exponent takes the form:  $-2\pi^2[h^2a^2U_{11}+2hka*b*U_{12}+\dots]$**

| Atom | U11      | U22       | U33      | U23       | U13      | U12      |
|------|----------|-----------|----------|-----------|----------|----------|
| C11  | 51.7(3)  | 64.3(3)   | 53.4(3)  | 7.1(2)    | 6.0(2)   | 15.5(2)  |
| C12  | 67.0(3)  | 62.4(3)   | 57.9(3)  | -9.4(2)   | 37.0(3)  | 10.3(2)  |
| F1   | 62.8(8)  | 107.1(12) | 55.6(8)  | -1.0(7)   | 5.4(6)   | -40.4(8) |
| F2   | 59.0(8)  | 102.7(12) | 75.9(9)  | 7.6(8)    | 4.1(7)   | 35.2(8)  |
| O1   | 53.9(7)  | 29.5(6)   | 41.8(6)  | -5.8(5)   | 16.4(5)  | -3.8(5)  |
| N1   | 41.9(7)  | 32.0(7)   | 38.7(7)  | -5.9(6)   | 10.4(6)  | -2.3(6)  |
| N2   | 33.2(7)  | 38.0(7)   | 31.9(7)  | 0.7(5)    | 12.2(5)  | 3.9(5)   |
| N3   | 37.3(7)  | 35.9(7)   | 32.2(7)  | 2.4(5)    | 10.9(5)  | -2.3(6)  |
| N4   | 45.9(8)  | 31.5(7)   | 32.6(7)  | -2.6(5)   | 14.4(6)  | -3.6(6)  |
| C1   | 30.7(7)  | 27.5(7)   | 33.4(8)  | -1.9(6)   | 11.9(6)  | 1.6(6)   |
| C2   | 36.9(8)  | 35.5(8)   | 40.3(8)  | -0.5(7)   | 16.6(7)  | 1.1(7)   |
| C3   | 34.7(8)  | 30.5(8)   | 32.7(8)  | -2.1(6)   | 13.4(6)  | 2.2(6)   |
| C4   | 35.7(8)  | 36.0(8)   | 34.7(8)  | 3.0(6)    | 12.1(6)  | -1.8(6)  |
| C5   | 32.8(8)  | 30.7(8)   | 37.8(8)  | -4.4(6)   | 9.7(6)   | 0.4(6)   |
| C6   | 39.7(8)  | 33.0(8)   | 40.5(8)  | -0.5(7)   | 18.3(7)  | -1.5(7)  |
| C7   | 32.6(8)  | 27.9(7)   | 40.6(8)  | 0.1(6)    | 15.6(6)  | -2.0(6)  |
| C8   | 31.7(8)  | 30.6(7)   | 37.1(8)  | 0.5(6)    | 10.4(6)  | 1.8(6)   |
| C9   | 50.9(10) | 30.7(8)   | 35.0(8)  | 0.7(6)    | 17.9(7)  | 6.8(7)   |
| C10  | 30.2(8)  | 47.1(9)   | 34.8(8)  | 0.7(7)    | 9.2(6)   | 6.2(7)   |
| C11  | 45.1(9)  | 34.0(8)   | 48.7(10) | -6.2(7)   | 26.1(8)  | -1.1(7)  |
| C12  | 36.7(8)  | 34.4(8)   | 47.9(10) | 1.8(7)    | 11.9(7)  | 0.3(7)   |
| C13  | 60.7(12) | 45.2(10)  | 43.3(10) | 0.8(8)    | 10.8(8)  | 16.4(9)  |
| C14  | 39.6(9)  | 35.1(9)   | 58.2(11) | -2.7(7)   | 19.4(8)  | 5.6(7)   |
| C15  | 56.2(11) | 36.2(9)   | 54.1(11) | -0.9(8)   | 6.3(9)   | -12.6(8) |
| C16  | 38.6(9)  | 59.6(11)  | 46.1(10) | -3.2(9)   | 14.2(8)  | -4.7(8)  |
| C17  | 40.4(9)  | 59.5(11)  | 39.2(9)  | 4.4(8)    | 10.5(7)  | -2.4(8)  |
| C18  | 44.7(10) | 60.6(12)  | 47.9(10) | -10.2(9)  | 13.7(8)  | 9.7(9)   |
| C19  | 67.0(13) | 45.5(11)  | 49.6(11) | 2.9(8)    | 22.6(10) | -5.3(9)  |
| C20  | 41.5(11) | 120(2)    | 48.9(11) | 4.5(13)   | 22.4(9)  | 8.1(13)  |
| C21  | 99.7(19) | 48.6(12)  | 42.0(11) | 6.9(9)    | 11.9(11) | 29.5(12) |
| C22  | 38.6(10) | 93.1(18)  | 54.6(12) | 6.5(12)   | 16.8(9)  | -8.6(11) |
| C23  | 56.0(13) | 99.1(19)  | 50.2(12) | -13.7(12) | 21.6(10) | 19.6(13) |
| C24  | 132(3)   | 40.7(11)  | 53.6(13) | 16.2(10)  | 41.6(15) | 20.2(14) |
| C25  | 106(2)   | 46.5(12)  | 71.1(16) | 8.8(11)   | 45.6(15) | -9.1(12) |

**Table S18 Bond Lengths for Compound (*cis*)-3j.**

| Atom | Atom | Length/Å   | Atom | Atom | Length/Å |
|------|------|------------|------|------|----------|
| C11  | C12  | 1.7336(19) | C4   | C17  | 1.500(2) |
| C12  | C11  | 1.7386(17) | C5   | C15  | 1.484(2) |
| F1   | C17  | 1.350(2)   | C6   | C7   | 1.396(2) |
| F2   | C17  | 1.345(3)   | C6   | C11  | 1.383(3) |
| O1   | C3   | 1.211(2)   | C8   | C10  | 1.510(2) |
| N1   | N4   | 1.4191(19) | C9   | C13  | 1.384(3) |
| N1   | C5   | 1.277(2)   | C9   | C19  | 1.382(3) |
| N2   | N3   | 1.3878(19) | C10  | C16  | 1.390(3) |
| N2   | C1   | 1.4634(19) | C10  | C18  | 1.384(3) |
| N2   | C7   | 1.403(2)   | C11  | C14  | 1.382(3) |
| N3   | C4   | 1.278(2)   | C12  | C14  | 1.376(3) |
| N4   | C3   | 1.365(2)   | C13  | C21  | 1.385(3) |
| N4   | C9   | 1.416(2)   | C16  | C22  | 1.389(3) |
| C1   | C3   | 1.534(2)   | C18  | C23  | 1.389(3) |
| C1   | C5   | 1.510(2)   | C19  | C25  | 1.387(3) |
| C1   | C8   | 1.569(2)   | C20  | C22  | 1.373(4) |
| C2   | C7   | 1.393(2)   | C20  | C23  | 1.370(4) |
| C2   | C12  | 1.386(2)   | C21  | C24  | 1.372(4) |
| C4   | C8   | 1.511(2)   | C24  | C25  | 1.369(4) |

**Table S19 Bond Angles for Compound (*cis*)-3j.**

| Atom | Atom | Atom | Angle/°    | Atom | Atom | Atom | Angle/°    |
|------|------|------|------------|------|------|------|------------|
| C5   | N1   | N4   | 108.42(13) | C10  | C8   | C1   | 114.96(13) |
| N3   | N2   | C1   | 110.76(12) | C10  | C8   | C4   | 121.18(14) |
| N3   | N2   | C7   | 117.66(13) | C13  | C9   | N4   | 119.37(18) |
| C7   | N2   | C1   | 123.81(13) | C19  | C9   | N4   | 119.60(17) |
| C4   | N3   | N2   | 108.41(13) | C19  | C9   | C13  | 121.01(18) |
| C3   | N4   | N1   | 112.85(13) | C16  | C10  | C8   | 122.39(16) |
| C3   | N4   | C9   | 127.98(14) | C18  | C10  | C8   | 118.62(17) |
| C9   | N4   | N1   | 118.80(13) | C18  | C10  | C16  | 118.95(17) |
| N2   | C1   | C3   | 113.45(12) | C6   | C11  | C12  | 118.58(15) |
| N2   | C1   | C5   | 118.74(13) | C14  | C11  | C12  | 118.10(14) |
| N2   | C1   | C8   | 100.89(12) | C14  | C11  | C6   | 123.31(16) |
| C3   | C1   | C8   | 111.19(13) | C2   | C12  | C11  | 117.68(14) |
| C5   | C1   | C3   | 101.34(12) | C14  | C12  | C11  | 119.80(14) |
| C5   | C1   | C8   | 111.55(12) | C14  | C12  | C2   | 122.50(17) |
| C12  | C2   | C7   | 118.93(15) | C9   | C13  | C21  | 118.8(2)   |
| O1   | C3   | N4   | 127.85(15) | C12  | C14  | C11  | 116.95(16) |
| O1   | C3   | C1   | 127.83(14) | C22  | C16  | C10  | 120.0(2)   |
| N4   | C3   | C1   | 104.32(13) | F1   | C17  | C4   | 110.34(16) |
| N3   | C4   | C8   | 114.22(14) | F2   | C17  | F1   | 107.10(17) |
| N3   | C4   | C17  | 117.82(15) | F2   | C17  | C4   | 109.83(16) |
| C17  | C4   | C8   | 127.63(15) | C10  | C18  | C23  | 120.6(2)   |
| N1   | C5   | C1   | 111.93(14) | C9   | C19  | C25  | 118.7(2)   |
| N1   | C5   | C15  | 122.57(16) | C23  | C20  | C22  | 120.2(2)   |
| C15  | C5   | C1   | 125.45(15) | C24  | C21  | C13  | 120.7(2)   |
| C11  | C6   | C7   | 118.06(16) | C20  | C22  | C16  | 120.4(2)   |
| C2   | C7   | N2   | 119.99(14) | C20  | C23  | C18  | 120.0(2)   |
| C2   | C7   | C6   | 120.23(15) | C25  | C24  | C21  | 119.9(2)   |
| C6   | C7   | N2   | 119.77(15) | C24  | C25  | C19  | 120.9(3)   |
| C4   | C8   | C1   | 98.71(12)  |      |      |      |            |



**Table S20 Hydrogen Atom Coordinates ( $\text{\AA}\times 10^4$ ) and Isotropic Displacement Parameters ( $\text{\AA}^2\times 10^3$ ) for Compound (*cis*)-3j.**

| Atom | x       | y        | z       | U(eq) |
|------|---------|----------|---------|-------|
| H2   | 3756.5  | 5834.46  | 3493.46 | 44    |
| H6   | 3451.37 | 5941.31  | 1015.65 | 44    |
| H8   | 1976.86 | 9740.74  | 2401.35 | 39    |
| H13  | 3502.94 | 5528.89  | 5507.76 | 60    |
| H14  | 5127.26 | 3321.27  | 2419.12 | 52    |
| H15A | 3507.36 | 10813.42 | 4091.16 | 75    |
| H15B | 2961.31 | 11246.37 | 3263.29 | 75    |
| H15C | 3655.85 | 10219.44 | 3247.67 | 75    |
| H16  | 923.62  | 5691.47  | 2394.38 | 57    |
| H17  | 1357.78 | 7814.89  | 323.18  | 55    |
| H18  | 1451.57 | 10692.09 | 3418.46 | 61    |
| H19  | 1595.79 | 3880.96  | 4275.77 | 63    |
| H20  | -100.69 | 7819.46  | 3974.34 | 82    |
| H21  | 3392.39 | 3761.98  | 6629.39 | 77    |
| H22  | 59.96   | 5462.95  | 3107.8  | 73    |
| H23  | 590.72  | 10429.46 | 4132.29 | 80    |
| H24  | 2399.7  | 2064.08  | 6575.55 | 87    |
| H25  | 1517.82 | 2068.12  | 5398.61 | 85    |

## X-Ray Crystallographic Data of Compound (*cis*)-6a

Thermal ellipsoids are set at a 50% probability level. Crystal data have been deposited to CCDC, number 2253538.

### Crystallization Details

The obtained compound (*cis*)-6a (35 mg) was dissolved in THF (0.2 mL) in a NMR tube at room temperature. Then petroleum ether (2 mL) was added to the solution slowly along the tube wall, resulting in a two-phase mixture. The colorless crystal of (*cis*)-6a was formed after the two-phase mixture has diffused.

### Experimental

A suitable crystal was selected and placed on a ROD, Synergy Custom system, HyPix diffractometer. The crystal was kept at 287.3(2) K during data collection. Using Olex2 [1], the structure was solved with the SHELXT [2] structure solution program using Intrinsic Phasing and refined with the SHELXL [3] refinement package using Least Squares minimisation.

### Crystal structure determination

Crystal Data for C<sub>25</sub>H<sub>19</sub>F<sub>3</sub>N<sub>4</sub>O (M = 448.44 g/mol): monoclinic, space group P2<sub>1</sub>/c (no. 14), a = 9.01840(10) Å, b = 19.8009(3) Å, c = 12.6774(2) Å, β = 101.0820(10)°, V = 2221.62(5) Å<sup>3</sup>, Z = 4, T = 287.3(2) K, μ(Cu Kα) = 0.855 mm<sup>-1</sup>, D<sub>calc</sub> = 1.341 g/cm<sup>3</sup>, 17080 reflections measured (8.394° ≤ 2θ ≤ 154.578°), 4459 unique (R<sub>int</sub> = 0.0283, R<sub>sigma</sub> = 0.0235) which were used in all calculations. The final R<sub>1</sub> was 0.0531 (I > 2σ(I)) and wR<sub>2</sub> was 0.1555 (all data).

### Refinement model description

Number of restraints - 0, number of constraints - unknown.

Details:

#### 1. Fixed Uiso

At 1.2 times of:

All C(H) groups

At 1.5 times of:

All C(H,H,H) groups

2.a Ternary CH refined with riding coordinates:

C5(H5)

3.b Aromatic/amide H refined with riding coordinates:

C8(H8), C9(H9), C10(H10), C11(H11), C12(H12), C14(H14), C15(H15), C16(H16),  
C17(H17), C18(H18), C20(H20), C21(H21), C22(H22), C23(H23), C24(H24)

4.c Idealised Me refined as rotating group:

C4(H4A,H4B,H4C)

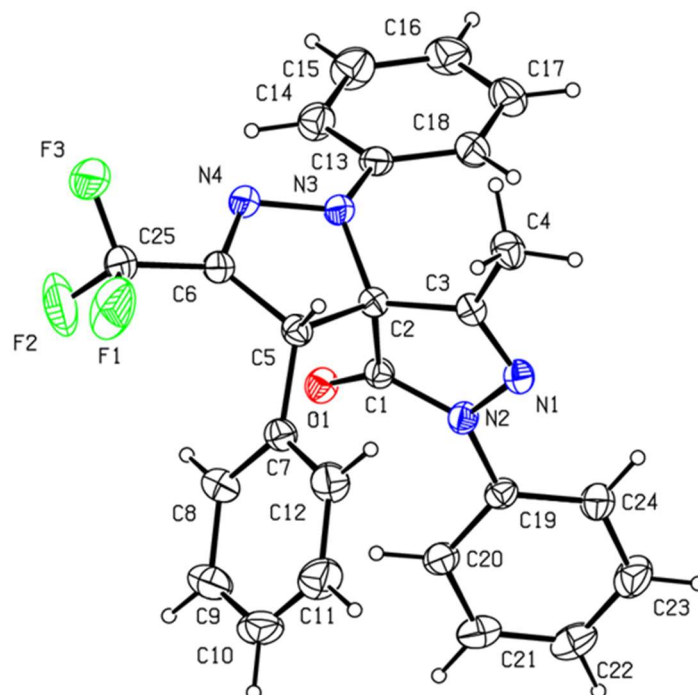

**Table S21 Crystal data and structure refinement for Compound (*cis*)-6a.**

|                                             |                                                                 |
|---------------------------------------------|-----------------------------------------------------------------|
| Identification code                         | Xray_1207_auto                                                  |
| Empirical formula                           | C <sub>25</sub> H <sub>19</sub> F <sub>3</sub> N <sub>4</sub> O |
| Formula weight                              | 448.44                                                          |
| Temperature/K                               | 287.3(2)                                                        |
| Crystal system                              | monoclinic                                                      |
| Space group                                 | P21/c                                                           |
| a/Å                                         | 9.01840(10)                                                     |
| b/Å                                         | 19.8009(3)                                                      |
| c/Å                                         | 12.6774(2)                                                      |
| $\alpha$ /°                                 | 90                                                              |
| $\beta$ /°                                  | 101.0820(10)                                                    |
| $\gamma$ /°                                 | 90                                                              |
| Volume/Å <sup>3</sup>                       | 2221.62(5)                                                      |
| Z                                           | 4                                                               |
| $\rho$ calc/g/cm <sup>3</sup>               | 1.341                                                           |
| $\mu$ /mm <sup>-1</sup>                     | 0.855                                                           |
| F(000)                                      | 928.0                                                           |
| Crystal size/mm <sup>3</sup>                | 0.19 × 0.11 × 0.09                                              |
| Radiation                                   | Cu K $\alpha$ ( $\lambda$ = 1.54184)                            |
| 2 $\Theta$ range for data collection/°      | 8.394 to 154.578                                                |
| Index ranges                                | -11 ≤ h ≤ 11, -23 ≤ k ≤ 24, -11 ≤ l ≤ 15                        |
| Reflections collected                       | 17080                                                           |
| Independent reflections                     | 4459 [Rint = 0.0283, Rsigma = 0.0235]                           |
| Data/restraints/parameters                  | 4459/0/300                                                      |
| Goodness-of-fit on F <sup>2</sup>           | 1.085                                                           |
| Final R indexes [ $I \geq 2\sigma(I)$ ]     | R1 = 0.0531, wR2 = 0.1510                                       |
| Final R indexes [all data]                  | R1 = 0.0581, wR2 = 0.1555                                       |
| Largest diff. peak/hole / e Å <sup>-3</sup> | 0.52/-0.32                                                      |

**Table S22 Fractional Atomic Coordinates ( $\times 10^4$ ) and Equivalent Isotropic Displacement Parameters ( $\text{\AA}^2 \times 10^3$ ) for Compound (*cis*)-6a.  $U_{eq}$  is defined as 1/3 of of the trace of the orthogonalised UIJ tensor.**

| Atom  | x          | y          | z          | $U_{eq}$  |
|-------|------------|------------|------------|-----------|
| F(1)  | 1607(2)    | 7715.4(10) | 3234.6(19) | 154.6(10) |
| F(2)  | 1116.1(17) | 8138.1(14) | 4594(2)    | 155.6(9)  |
| F(3)  | 2080.4(17) | 8732.5(10) | 3558(2)    | 144.2(9)  |
| O(1)  | 4955.9(13) | 7296.3(6)  | 7108.5(9)  | 55.1(3)   |
| N(1)  | 7663.6(15) | 6563.3(7)  | 5840.9(11) | 52.1(3)   |
| N(2)  | 6759.0(15) | 6583.2(7)  | 6638.8(11) | 48.8(3)   |
| N(3)  | 5913.8(15) | 8152.5(7)  | 5442.2(11) | 51.0(3)   |
| N(4)  | 4500.7(16) | 8412.2(7)  | 5067.0(13) | 57.7(4)   |
| C(25) | 2127(2)    | 8137.9(12) | 3999(2)    | 77.4(6)   |
| C(1)  | 5760.1(16) | 7106.5(8)  | 6500.8(12) | 44.7(3)   |
| C(2)  | 5879.1(16) | 7411.8(8)  | 5412.9(12) | 45.1(4)   |
| C(3)  | 7224.0(17) | 7039.8(9)  | 5168.5(13) | 48.6(4)   |
| C(4)  | 7929(2)    | 7170.5(11) | 4220.6(15) | 65.3(5)   |
| C(5)  | 4431.0(17) | 7275.9(8)  | 4533.9(12) | 48.3(4)   |
| C(6)  | 3656.0(19) | 7945.4(9)  | 4587.6(15) | 56.0(4)   |
| C(7)  | 3610.8(19) | 6625.0(9)  | 4665.0(13) | 51.5(4)   |
| C(8)  | 2560(2)    | 6565.6(11) | 5318.3(16) | 64.8(5)   |
| C(9)  | 1868(3)    | 5947.5(13) | 5426(2)    | 83.8(7)   |
| C(10) | 2240(3)    | 5391.8(13) | 4893(2)    | 92.7(8)   |
| C(11) | 3280(3)    | 5443.5(12) | 4251(2)    | 95.6(8)   |
| C(12) | 3959(3)    | 6057.1(11) | 4127.2(19) | 73.9(6)   |
| C(13) | 6888.5(19) | 8529.1(8)  | 6238.4(13) | 52.1(4)   |
| C(14) | 6336(2)    | 9065.9(10) | 6743.4(17) | 69.5(5)   |
| C(15) | 7312(3)    | 9460.1(12) | 7463(2)    | 87.3(7)   |
| C(16) | 8827(3)    | 9318.1(12) | 7696(2)    | 85.4(7)   |
| C(17) | 9376(2)    | 8774.9(13) | 7217.9(19) | 78.0(6)   |
| C(18) | 8413(2)    | 8379.9(10) | 6483.9(17) | 65.2(5)   |
| C(19) | 7042.1(19) | 6109.2(8)  | 7495.3(12) | 49.3(4)   |
| C(20) | 5880(2)    | 5923.5(9)  | 8006.7(15) | 60.6(4)   |
| C(21) | 6166(3)    | 5462.1(10) | 8841.3(17) | 73.7(6)   |
| C(22) | 7563(3)    | 5184.1(12) | 9147.9(18) | 83.4(7)   |
| C(23) | 8709(3)    | 5366.2(13) | 8630(2)    | 84.5(7)   |
| C(24) | 8462(2)    | 5834.7(11) | 7807.1(16) | 66.1(5)   |

**Table S23 Anisotropic Displacement Parameters ( $\text{\AA}^2 \times 10^3$ ) for Compound (*cis*)-6a. The Anisotropic displacement factor exponent takes the form: - $2\pi^2[h_2a^*2U_{11}+2hka^*b^*U_{12}+\dots]$ .**

| Atom  | U11       | U22       | U33       | U23       | U13       | U12       |
|-------|-----------|-----------|-----------|-----------|-----------|-----------|
| F(1)  | 110.3(13) | 128.8(16) | 181(2)    | -31.6(14) | -81.2(13) | 23.1(11)  |
| F(2)  | 52.8(8)   | 232(3)    | 184(2)    | 50.5(18)  | 26.7(10)  | 26.5(11)  |
| F(3)  | 71.4(9)   | 107.7(12) | 227(2)    | 81.6(14)  | -36.8(11) | -1.4(8)   |
| O(1)  | 58.3(7)   | 57.7(7)   | 51.8(6)   | -2.7(5)   | 17.0(5)   | 7.2(5)    |
| N(1)  | 46.8(7)   | 56.1(8)   | 54.9(7)   | -2.3(6)   | 13.3(6)   | 3.8(6)    |
| N(2)  | 47.8(7)   | 49.5(7)   | 50.0(7)   | 2.5(5)    | 11.8(5)   | 5.6(5)    |
| N(3)  | 44.2(7)   | 44.4(7)   | 61.1(8)   | 3.8(6)    | 2.1(6)    | -0.9(5)   |
| N(4)  | 46.6(7)   | 50.5(8)   | 72.8(9)   | 9.3(7)    | 3.4(6)    | 1.7(6)    |
| C(25) | 47.1(10)  | 69.0(13)  | 107.4(17) | 14.6(12)  | -6.7(10)  | -2.3(9)   |
| C(1)  | 42.8(7)   | 44.9(8)   | 45.4(8)   | -3.1(6)   | 6.4(6)    | -1.3(6)   |
| C(2)  | 41.7(7)   | 45.1(8)   | 48.1(8)   | -0.1(6)   | 8.0(6)    | -1.1(6)   |
| C(3)  | 42.6(8)   | 52.8(9)   | 50.7(8)   | -2.2(7)   | 9.5(6)    | -1.5(7)   |
| C(4)  | 57.2(10)  | 82.0(13)  | 61.0(10)  | 3.0(9)    | 21.8(8)   | 0.6(9)    |
| C(5)  | 44.5(8)   | 54.1(9)   | 45.4(8)   | 1.9(6)    | 6.6(6)    | -2.2(7)   |
| C(6)  | 46.9(9)   | 53.8(9)   | 64.5(10)  | 8.9(8)    | 3.2(7)    | -1.6(7)   |
| C(7)  | 48.4(8)   | 53.0(9)   | 49.8(8)   | -1.6(7)   | 0.8(6)    | -4.9(7)   |
| C(8)  | 63.0(11)  | 66.3(12)  | 65.6(11)  | 0.2(9)    | 13.8(9)   | -13.4(9)  |
| C(9)  | 78.3(14)  | 88.8(17)  | 81.5(14)  | 16.8(12)  | 8.9(11)   | -28.6(12) |
| C(10) | 91.4(17)  | 63.1(14)  | 109.3(19) | 12.1(13)  | -16.5(14) | -25.3(12) |
| C(11) | 96.7(18)  | 57.7(13)  | 122(2)    | -25.6(13) | -4.5(16)  | -6.2(12)  |
| C(12) | 69.1(12)  | 68.3(12)  | 82.5(13)  | -21.7(10) | 10.1(10)  | -5.4(10)  |
| C(13) | 52.7(9)   | 46.0(8)   | 55.4(9)   | 5.1(7)    | 4.9(7)    | -7.2(7)   |
| C(14) | 69.1(12)  | 61.2(11)  | 74.4(12)  | -7.3(9)   | 4.7(9)    | 1.9(9)    |
| C(15) | 99.2(17)  | 67.7(14)  | 87.4(15)  | -20.9(11) | -1.4(13)  | -1.7(12)  |
| C(16) | 91.7(16)  | 70.4(14)  | 84.2(14)  | -11.1(11) | -8.3(12)  | -22.5(12) |
| C(17) | 57.0(11)  | 82.3(15)  | 88.2(14)  | 0.1(12)   | -2.4(10)  | -16.7(10) |
| C(18) | 53.1(10)  | 61.9(11)  | 78.0(12)  | -4.4(9)   | 6.2(9)    | -7.4(8)   |
| C(19) | 55.5(9)   | 41.7(8)   | 48.4(8)   | -2.9(6)   | 4.2(7)    | -0.2(7)   |
| C(20) | 67.8(11)  | 49.8(9)   | 66.1(10)  | 4.7(8)    | 17.6(8)   | 2.4(8)    |
| C(21) | 102.1(16) | 52.6(11)  | 70.7(12)  | 6.3(9)    | 27.2(11)  | -3.3(10)  |
| C(22) | 116.7(19) | 60.9(12)  | 67.2(12)  | 15.7(10)  | 4.0(12)   | 6.5(12)   |
| C(23) | 81.2(14)  | 81.5(15)  | 81.0(14)  | 17.0(12)  | -9.2(11)  | 15.8(12)  |
| C(24) | 57.4(10)  | 68.1(12)  | 67.2(11)  | 7.3(9)    | -1.8(8)   | 2.0(9)    |

**Table S24 Bond Lengths for Compound (*cis*)-6a.**

| Atom  | Atom  | Length/Å   | Atom  | Atom  | Length/Å |
|-------|-------|------------|-------|-------|----------|
| F(1)  | C(25) | 1.298(3)   | C(7)  | C(8)  | 1.378(3) |
| F(2)  | C(25) | 1.291(3)   | C(7)  | C(12) | 1.382(3) |
| F(3)  | C(25) | 1.300(3)   | C(8)  | C(9)  | 1.393(3) |
| O(1)  | C(1)  | 1.2147(18) | C(9)  | C(10) | 1.366(4) |
| N(1)  | N(2)  | 1.4169(18) | C(10) | C(11) | 1.359(4) |
| N(1)  | C(3)  | 1.282(2)   | C(11) | C(12) | 1.383(3) |
| N(2)  | C(1)  | 1.362(2)   | C(13) | C(14) | 1.382(3) |
| N(2)  | C(19) | 1.421(2)   | C(13) | C(18) | 1.382(3) |
| N(3)  | N(4)  | 1.3717(19) | C(14) | C(15) | 1.381(3) |
| N(3)  | C(2)  | 1.467(2)   | C(15) | C(16) | 1.370(4) |
| N(3)  | C(13) | 1.416(2)   | C(16) | C(17) | 1.372(4) |
| N(4)  | C(6)  | 1.275(2)   | C(17) | C(18) | 1.386(3) |
| C(25) | C(6)  | 1.486(3)   | C(19) | C(20) | 1.384(2) |
| C(1)  | C(2)  | 1.528(2)   | C(19) | C(24) | 1.377(3) |
| C(2)  | C(3)  | 1.501(2)   | C(20) | C(21) | 1.384(3) |
| C(2)  | C(5)  | 1.569(2)   | C(21) | C(22) | 1.361(4) |
| C(3)  | C(4)  | 1.486(2)   | C(22) | C(23) | 1.375(4) |
| C(5)  | C(6)  | 1.506(2)   | C(23) | C(24) | 1.382(3) |
| C(5)  | C(7)  | 1.511(2)   |       |       |          |

**Table S25 Bond Angles for Compound (*cis*)-6a.**

| Atom  | Atom  | Atom  | Angle/°    | Atom  | Atom  | Atom  | Angle/°    |
|-------|-------|-------|------------|-------|-------|-------|------------|
| C(3)  | N(1)  | N(2)  | 107.89(13) | C(7)  | C(5)  | C(2)  | 115.25(13) |
| N(1)  | N(2)  | C(19) | 118.92(13) | N(4)  | C(6)  | C(25) | 117.72(17) |
| C(1)  | N(2)  | N(1)  | 112.76(12) | N(4)  | C(6)  | C(5)  | 114.81(15) |
| C(1)  | N(2)  | C(19) | 128.17(13) | C(25) | C(6)  | C(5)  | 126.65(17) |
| N(4)  | N(3)  | C(2)  | 110.62(12) | C(8)  | C(7)  | C(5)  | 123.12(16) |
| N(4)  | N(3)  | C(13) | 117.24(14) | C(8)  | C(7)  | C(12) | 118.36(18) |
| C(13) | N(3)  | C(2)  | 123.47(13) | C(12) | C(7)  | C(5)  | 118.50(17) |
| C(6)  | N(4)  | N(3)  | 108.88(14) | C(7)  | C(8)  | C(9)  | 120.4(2)   |
| F(1)  | C(25) | F(3)  | 106.6(2)   | C(10) | C(9)  | C(8)  | 120.1(2)   |
| F(1)  | C(25) | C(6)  | 112.2(2)   | C(11) | C(10) | C(9)  | 119.9(2)   |
| F(2)  | C(25) | F(1)  | 104.0(2)   | C(10) | C(11) | C(12) | 120.4(2)   |
| F(2)  | C(25) | F(3)  | 106.4(2)   | C(7)  | C(12) | C(11) | 120.7(2)   |
| F(2)  | C(25) | C(6)  | 113.4(2)   | C(14) | C(13) | N(3)  | 120.35(16) |
| F(3)  | C(25) | C(6)  | 113.47(17) | C(14) | C(13) | C(18) | 119.45(17) |
| O(1)  | C(1)  | N(2)  | 127.93(14) | C(18) | C(13) | N(3)  | 120.15(16) |
| O(1)  | C(1)  | C(2)  | 127.15(14) | C(15) | C(14) | C(13) | 120.0(2)   |
| N(2)  | C(1)  | C(2)  | 104.91(12) | C(16) | C(15) | C(14) | 120.6(2)   |
| N(3)  | C(2)  | C(1)  | 112.17(12) | C(15) | C(16) | C(17) | 119.6(2)   |
| N(3)  | C(2)  | C(3)  | 118.78(13) | C(16) | C(17) | C(18) | 120.4(2)   |
| N(3)  | C(2)  | C(5)  | 101.55(12) | C(13) | C(18) | C(17) | 119.9(2)   |
| C(1)  | C(2)  | C(5)  | 112.33(12) | C(20) | C(19) | N(2)  | 119.51(15) |
| C(3)  | C(2)  | C(1)  | 101.06(12) | C(24) | C(19) | N(2)  | 120.05(16) |
| C(3)  | C(2)  | C(5)  | 111.38(13) | C(24) | C(19) | C(20) | 120.44(17) |
| N(1)  | C(3)  | C(2)  | 112.50(14) | C(19) | C(20) | C(21) | 119.15(19) |
| N(1)  | C(3)  | C(4)  | 122.68(15) | C(22) | C(21) | C(20) | 120.8(2)   |
| C(4)  | C(3)  | C(2)  | 124.72(15) | C(21) | C(22) | C(23) | 119.8(2)   |
| C(6)  | C(5)  | C(2)  | 98.46(13)  | C(22) | C(23) | C(24) | 120.6(2)   |
| C(6)  | C(5)  | C(7)  | 120.30(14) | C(19) | C(24) | C(23) | 119.2(2)   |



**Table S26 Torsion Angles for Compound (*cis*)-6a.**

| A    | B     | C     | D     | Angle/°     | A     | B     | C     | D     | Angle/°     |
|------|-------|-------|-------|-------------|-------|-------|-------|-------|-------------|
| F(1) | C(25) | C(6)  | N(4)  | 155.3(2)    | C(2)  | N(3)  | C(13) | C(18) | 49.4(2)     |
| F(1) | C(25) | C(6)  | C(5)  | -13.7(3)    | C(2)  | C(5)  | C(6)  | N(4)  | 15.72(19)   |
| F(2) | C(25) | C(6)  | N(4)  | -87.2(3)    | C(2)  | C(5)  | C(6)  | C(25) | -174.99(18) |
| F(2) | C(25) | C(6)  | C(5)  | 103.8(3)    | C(2)  | C(5)  | C(7)  | C(8)  | 84.6(2)     |
| F(3) | C(25) | C(6)  | N(4)  | 34.4(3)     | C(2)  | C(5)  | C(7)  | C(12) | -93.54(19)  |
| F(3) | C(25) | C(6)  | C(5)  | -134.6(2)   | C(3)  | N(1)  | N(2)  | C(1)  | -2.96(18)   |
| O(1) | C(1)  | C(2)  | N(3)  | 42.9(2)     | C(3)  | N(1)  | N(2)  | C(19) | -178.90(14) |
| O(1) | C(1)  | C(2)  | C(3)  | 170.44(16)  | C(3)  | C(2)  | C(5)  | C(6)  | -148.79(14) |
| O(1) | C(1)  | C(2)  | C(5)  | -70.8(2)    | C(3)  | C(2)  | C(5)  | C(7)  | 81.85(17)   |
| N(1) | N(2)  | C(1)  | O(1)  | -171.57(15) | C(5)  | C(2)  | C(3)  | N(1)  | -111.50(16) |
| N(1) | N(2)  | C(1)  | C(2)  | 7.87(17)    | C(5)  | C(2)  | C(3)  | C(4)  | 64.9(2)     |
| N(1) | N(2)  | C(19) | C(20) | -153.32(15) | C(5)  | C(7)  | C(8)  | C(9)  | -178.45(18) |
| N(1) | N(2)  | C(19) | C(24) | 26.3(2)     | C(5)  | C(7)  | C(12) | C(11) | 177.7(2)    |
| N(2) | N(1)  | C(3)  | C(2)  | -3.68(18)   | C(6)  | C(5)  | C(7)  | C(8)  | -33.0(2)    |
| N(2) | N(1)  | C(3)  | C(4)  | 179.86(15)  | C(6)  | C(5)  | C(7)  | C(12) | 148.80(18)  |
| N(2) | C(1)  | C(2)  | N(3)  | -136.56(13) | C(7)  | C(5)  | C(6)  | N(4)  | 141.63(16)  |
| N(2) | C(1)  | C(2)  | C(3)  | -9.01(15)   | C(7)  | C(5)  | C(6)  | C(25) | -49.1(3)    |
| N(2) | C(1)  | C(2)  | C(5)  | 109.79(14)  | C(7)  | C(8)  | C(9)  | C(10) | 0.8(3)      |
| N(2) | C(19) | C(20) | C(21) | -179.91(16) | C(8)  | C(7)  | C(12) | C(11) | -0.6(3)     |
| N(2) | C(19) | C(24) | C(23) | -178.94(18) | C(8)  | C(9)  | C(10) | C(11) | -0.5(4)     |
| N(3) | N(4)  | C(6)  | C(25) | -172.44(17) | C(9)  | C(10) | C(11) | C(12) | -0.4(4)     |
| N(3) | N(4)  | C(6)  | C(5)  | -2.1(2)     | C(10) | C(11) | C(12) | C(7)  | 1.0(4)      |
| N(3) | C(2)  | C(3)  | N(1)  | 131.08(15)  | C(12) | C(7)  | C(8)  | C(9)  | -0.3(3)     |
| N(3) | C(2)  | C(3)  | C(4)  | -52.5(2)    | C(13) | N(3)  | N(4)  | C(6)  | -163.14(15) |
| N(3) | C(2)  | C(5)  | C(6)  | -21.36(14)  | C(13) | N(3)  | C(2)  | C(1)  | 49.53(19)   |
| N(3) | C(2)  | C(5)  | C(7)  | -150.72(14) | C(13) | N(3)  | C(2)  | C(3)  | -67.9(2)    |
| N(3) | C(13) | C(14) | C(15) | -175.41(19) | C(13) | N(3)  | C(2)  | C(5)  | 169.66(14)  |
| N(3) | C(13) | C(18) | C(17) | 176.23(18)  | C(13) | C(14) | C(15) | C(16) | -1.0(4)     |
| N(4) | N(3)  | C(2)  | C(1)  | -97.06(15)  | C(14) | C(13) | C(18) | C(17) | -1.1(3)     |
| N(4) | N(3)  | C(2)  | C(3)  | 145.54(14)  | C(14) | C(15) | C(16) | C(17) | -0.7(4)     |
| N(4) | N(3)  | C(2)  | C(5)  | 23.07(16)   | C(15) | C(16) | C(17) | C(18) | 1.5(4)      |
| N(4) | N(3)  | C(13) | C(14) | 11.3(2)     | C(16) | C(17) | C(18) | C(13) | -0.7(3)     |
| N(4) | N(3)  | C(13) | C(18) | -166.02(16) | C(18) | C(13) | C(14) | C(15) | 1.9(3)      |
| C(1) | N(2)  | C(19) | C(20) | 31.4(2)     | C(19) | N(2)  | C(1)  | O(1)  | 3.9(3)      |
| C(1) | N(2)  | C(19) | C(24) | -148.97(18) | C(19) | N(2)  | C(1)  | C(2)  | -176.66(14) |
| C(1) | C(2)  | C(3)  | N(1)  | 7.98(17)    | C(19) | C(20) | C(21) | C(22) | -1.1(3)     |
| C(1) | C(2)  | C(3)  | C(4)  | -175.64(16) | C(20) | C(19) | C(24) | C(23) | 0.6(3)      |
| C(1) | C(2)  | C(5)  | C(6)  | 98.66(15)   | C(20) | C(21) | C(22) | C(23) | 0.5(4)      |
| C(1) | C(2)  | C(5)  | C(7)  | -30.70(19)  | C(21) | C(22) | C(23) | C(24) | 0.7(4)      |
| C(2) | N(3)  | N(4)  | C(6)  | -14.24(19)  | C(22) | C(23) | C(24) | C(19) | -1.2(4)     |

|      |      |       |       |             |       |       |       |       |        |
|------|------|-------|-------|-------------|-------|-------|-------|-------|--------|
| C(2) | N(3) | C(13) | C(14) | -133.32(18) | C(24) | C(19) | C(20) | C(21) | 0.5(3) |
|------|------|-------|-------|-------------|-------|-------|-------|-------|--------|

**Table S27 Hydrogen Atom Coordinates ( $\text{\AA}\times 10^4$ ) and Isotropic Displacement Parameters ( $\text{\AA}^2\times 10^3$ ) for Compound (*cis*)-6a.**

| Atom  | x        | y       | z       | U(eq) |
|-------|----------|---------|---------|-------|
| H(4A) | 8867.74  | 6929.62 | 4300.91 | 98    |
| H(4B) | 8113.31  | 7645.69 | 4168.17 | 98    |
| H(4C) | 7261     | 7020.64 | 3580.43 | 98    |
| H(5)  | 4750.95  | 7254.79 | 3838.38 | 58    |
| H(8)  | 2311.74  | 6940.94 | 5689.86 | 78    |
| H(9)  | 1150.62  | 5912.88 | 5861.2  | 101   |
| H(10) | 1782.32  | 4978.62 | 4970.2  | 111   |
| H(11) | 3536.95  | 5064.07 | 3892.31 | 115   |
| H(12) | 4658.51  | 6087.98 | 3677.23 | 89    |
| H(14) | 5307.3   | 9161.62 | 6598.67 | 83    |
| H(15) | 6937.79  | 9825.02 | 7792.54 | 105   |
| H(16) | 9480.36  | 9588.5  | 8174.79 | 103   |
| H(17) | 10399.59 | 8671.22 | 7387.86 | 94    |
| H(18) | 8792.75  | 8015.13 | 6157.17 | 78    |
| H(20) | 4919.35  | 6106.25 | 7792.27 | 73    |
| H(21) | 5394.68  | 5340.73 | 9196.75 | 88    |
| H(22) | 7741.2   | 4871.83 | 9705.96 | 100   |
| H(23) | 9660.03  | 5172.26 | 8835.59 | 101   |
| H(24) | 9244.67  | 5963.14 | 7467.84 | 79    |
